# Supplementary material for: Rapid functionalization of multiple C–H bonds in unprotected alicyclic amines
Source: Springer Nature journal article supplement (doi:10.1038/s41557-020-0438-z), 2020-03-30
Supplement: 41557_2020_438_MOESM129_ESM.cif [file 41557_2020_438_MOESM129_ESM.cif]

data_weij1 

_audit_update_record
;
2019-03-19 # Formatted by publCIF

;

# publcif _publ_body_element loop start
loop_
_publ_body_element
_publ_body_title
_publ_body_contents

 section 
;
Introduction
; 
;

;
 section 
;
Experimental
; 
;

;
 subsection 
;
Synthesis and crystallization
; 
;

;
 subsection 
;
Refinement
;
;
Crystal data, data collection and structure refinement details are summarized
in Table 1.
;

 section 
;
Results and discussion
; 
;

;
# publcif _publ_body_element loop end
  
_audit_creation_method            'SHELXL-2014/7' 
_shelx_SHELXL_version_number      '2014/7' 
_chemical_name_systematic         ? 
_chemical_name_common             ? 
_chemical_melting_point           ? 
_chemical_formula_moiety          ? 
_chemical_formula_sum 
 'C18 H21 N' 
_chemical_formula_weight          251.36 
  
loop_ 
 _atom_type_symbol 
 _atom_type_description 
 _atom_type_scat_dispersion_real 
 _atom_type_scat_dispersion_imag 
 _atom_type_scat_source 
 'C'  'C'   0.0033   0.0016 
 'International Tables Vol C Tables 4.2.6.8 and 6.1.1.4' 
 'H'  'H'   0.0000   0.0000 
 'International Tables Vol C Tables 4.2.6.8 and 6.1.1.4' 
 'N'  'N'   0.0061   0.0033 
 'International Tables Vol C Tables 4.2.6.8 and 6.1.1.4' 
  
_space_group_crystal_system       monoclinic 
_space_group_IT_number            14 
_space_group_name_H-M_alt         'P 21/c' 
_space_group_name_Hall            '-P 2ybc' 
  
_shelx_space_group_comment 
; 
The symmetry employed for this shelxl refinement is uniquely defined 
by the following loop, which should always be used as a source of 
symmetry information in preference to the above space-group names. 
They are only intended as comments. 
; 
  
loop_ 
 _space_group_symop_operation_xyz 
 'x, y, z' 
 '-x, y+1/2, -z+1/2' 
 '-x, -y, -z' 
 'x, -y-1/2, z-1/2' 
  
_cell_length_a                    14.1447(3) 
_cell_length_b                    5.47770(10) 
_cell_length_c                    19.1702(4) 
_cell_angle_alpha                 90 
_cell_angle_beta                  110.0050(10) 
_cell_angle_gamma                 90 
_cell_volume                      1395.70(5) 
_cell_formula_units_Z             4 
_cell_measurement_temperature     100(2) 
_cell_measurement_reflns_used     8771 
_cell_measurement_theta_min       3.07 
_cell_measurement_theta_max       27.99 
  
_exptl_crystal_description        needle 
_exptl_crystal_colour             colourless 

_exptl_crystal_density_meas       . 
_exptl_crystal_density_method     ? 

_exptl_crystal_density_diffrn     1.196 
_exptl_crystal_F_000              544 

_exptl_transmission_factor_min    0.6971   
_exptl_transmission_factor_max    0.7456 

_exptl_crystal_size_max           0.486 
_exptl_crystal_size_mid           0.182 
_exptl_crystal_size_min           0.088 
_exptl_absorpt_coefficient_mu     0.069 
_shelx_estimated_absorpt_T_min    0.967 
_shelx_estimated_absorpt_T_max    0.994 
_exptl_absorpt_correction_type    integration 
_exptl_absorpt_correction_T_min   0.9813 
_exptl_absorpt_correction_T_max   0.9943 

_exptl_absorpt_process_details    
'based on measured indexed crystal faces, Bruker SHELXTL2014 (Sheldrick, 2014)'

_diffrn_ambient_temperature       100(2) 
_diffrn_radiation_wavelength      0.71073 
_diffrn_radiation_type            MoK\a 
_diffrn_source               'fine-focus sealed tube' 
_diffrn_measurement_device_type   'Bruker APEX-II DUO' 
_diffrn_measurement_method        'phi and omega scans'
_diffrn_detector_area_resol_mean  ? 

_diffrn_reflns_number             24221 
_diffrn_reflns_av_unetI/netI      0.0173 
_diffrn_reflns_av_R_equivalents   0.0347 
_diffrn_reflns_limit_h_min        -18 
_diffrn_reflns_limit_h_max        18 
_diffrn_reflns_limit_k_min        -7 
_diffrn_reflns_limit_k_max        7 
_diffrn_reflns_limit_l_min        -25 
_diffrn_reflns_limit_l_max        25 
_diffrn_reflns_theta_min          1.532 
_diffrn_reflns_theta_max          28.009 
_diffrn_reflns_theta_full         25.000 
_diffrn_measured_fraction_theta_max   0.996 
_diffrn_measured_fraction_theta_full  0.997 
_diffrn_reflns_Laue_measured_fraction_max    0.996 
_diffrn_reflns_Laue_measured_fraction_full   0.997 
_diffrn_reflns_point_group_measured_fraction_max   0.996 
_diffrn_reflns_point_group_measured_fraction_full  0.997 
_reflns_number_total              3358 
_reflns_number_gt                 2911 
_reflns_threshold_expression      'I > 2\s(I)' 
_reflns_Friedel_coverage          0.000 
_reflns_Friedel_fraction_max      . 
_reflns_Friedel_fraction_full     . 
  
_reflns_special_details 
; 
 Reflections were merged by SHELXL according to the crystal 
 class for the calculation of statistics and refinement. 
  
 _reflns_Friedel_fraction is defined as the number of unique 
 Friedel pairs measured divided by the number that would be 
 possible theoretically, ignoring centric projections and 
 systematic absences. 
; 
  
_computing_data_collection        'Bruker APEX3 (Bruker, 2014)' 
_computing_cell_refinement        'Bruker APEX3 (Bruker, 2014)' 
_computing_data_reduction         'Bruker Apex3 SAINT (Bruker, 2014)' 
_computing_structure_solution     'SHELXL2014/7, Sheldrick G. M. 2014' 
_computing_structure_refinement   'SHELXL2014/7, Sheldrick G. M. 2014'
_computing_molecular_graphics     'XP in SHELXTL-plus, Bruker 2014' 
_computing_publication_material   'SHELXL2014/7, Sheldrick, G. M. 2014' 

_refine_special_details           
;
All H atoms were positioned geometrically ( C---H = 0.93/1.00 \%A) and   
allowed to ride with <i>U</i>~iso~(H)= 1.2/1.5<i>U</i>~eq~(C).
Methyl ones were allowed to rotate around the corresponding C---C.
;

_refine_ls_structure_factor_coef  Fsqd 
_refine_ls_matrix_type            full 
_refine_ls_weighting_scheme       calc 
_refine_ls_weighting_details 
'w=1/[\s^2^(Fo^2^)+(0.0508P)^2^+0.4340P] where P=(Fo^2^+2Fc^2^)/3' 

_atom_sites_solution_primary      direct 
_atom_sites_solution_secondary    difmap

_atom_sites_solution_hydrogens    mixed 
_refine_ls_hydrogen_treatment     mixed 
_refine_ls_extinction_method      none 
_refine_ls_extinction_coef        . 
_refine_ls_number_reflns          3358 
_refine_ls_number_parameters      176 
_refine_ls_number_restraints      0 
_refine_ls_R_factor_all           0.0440 
_refine_ls_R_factor_gt            0.0382 
_refine_ls_wR_factor_ref          0.1062 
_refine_ls_wR_factor_gt           0.1022 
_refine_ls_goodness_of_fit_ref    1.074 
_refine_ls_restrained_S_all       1.074 
_refine_ls_shift/su_max           0.000 
_refine_ls_shift/su_mean          0.000 
  
loop_ 
 _atom_site_label 
 _atom_site_type_symbol 
 _atom_site_fract_x 
 _atom_site_fract_y 
 _atom_site_fract_z 
 _atom_site_U_iso_or_equiv 
 _atom_site_adp_type 
 _atom_site_occupancy 
 _atom_site_site_symmetry_order 
 _atom_site_calc_flag 
 _atom_site_refinement_flags_posn 
 _atom_site_refinement_flags_adp 
 _atom_site_refinement_flags_occupancy 
 _atom_site_disorder_assembly 
 _atom_site_disorder_group 
N1 N 0.06398(8) 0.9628(2) 0.44532(5) 0.0281(2) Uani 1 1 d . . . . . 
C2 C 0.12809(7) 0.74511(18) 0.46859(5) 0.01577(19) Uani 1 1 d . . . . . 
H2A H 0.0840 0.5973 0.4555 0.019 Uiso 1 1 calc R U . . . 
C3 C 0.20344(7) 0.73227(17) 0.42633(5) 0.01381(19) Uani 1 1 d . . . . . 
H3A H 0.2458 0.8831 0.4383 0.017 Uiso 1 1 calc R U . . . 
C4 C 0.14534(7) 0.73101(19) 0.34273(5) 0.0178(2) Uani 1 1 d . . . . . 
H4A H 0.1936 0.7349 0.3156 0.021 Uiso 1 1 calc R U . . . 
H4B H 0.1060 0.5781 0.3292 0.021 Uiso 1 1 calc R U . . . 
C5 C 0.07439(7) 0.9488(2) 0.31921(5) 0.0198(2) Uani 1 1 d . . . . . 
H5A H 0.0332 0.9337 0.2660 0.024 Uiso 1 1 calc R U . . . 
H5B H 0.1141 1.1013 0.3259 0.024 Uiso 1 1 calc R U . . . 
C6 C 0.00554(8) 0.9610(2) 0.36548(6) 0.0247(2) Uani 1 1 d . . . . . 
H6A H -0.0361 1.1106 0.3524 0.030 Uiso 1 1 calc R U . . . 
H6B H -0.0402 0.8185 0.3538 0.030 Uiso 1 1 calc R U . . . 
C7 C 0.18076(7) 0.74843(18) 0.55205(5) 0.0155(2) Uani 1 1 d . . . . . 
C8 C 0.24535(8) 0.93974(19) 0.58619(5) 0.0189(2) Uani 1 1 d . . . . . 
H8A H 0.2541 1.0724 0.5571 0.023 Uiso 1 1 calc R U . . . 
C9 C 0.29695(8) 0.9382(2) 0.66230(6) 0.0207(2) Uani 1 1 d . . . . . 
H9A H 0.3408 1.0692 0.6848 0.025 Uiso 1 1 calc R U . . . 
C10 C 0.28455(7) 0.7454(2) 0.70570(5) 0.0195(2) Uani 1 1 d . . . . . 
H10A H 0.3202 0.7438 0.7576 0.023 Uiso 1 1 calc R U . . . 
C11 C 0.21978(8) 0.55552(19) 0.67252(5) 0.0198(2) Uani 1 1 d . . . . . 
H11A H 0.2105 0.4242 0.7019 0.024 Uiso 1 1 calc R U . . . 
C12 C 0.16822(7) 0.55712(19) 0.59606(5) 0.0178(2) Uani 1 1 d . . . . . 
H12A H 0.1241 0.4264 0.5738 0.021 Uiso 1 1 calc R U . . . 
C13 C 0.27379(7) 0.51094(18) 0.44967(5) 0.01575(19) Uani 1 1 d . . . . . 
H13A H 0.3046 0.5088 0.5045 0.019 Uiso 1 1 calc R U . . . 
H13B H 0.2336 0.3599 0.4343 0.019 Uiso 1 1 calc R U . . . 
C14 C 0.35666(7) 0.51146(18) 0.41631(5) 0.0156(2) Uani 1 1 d . . . . . 
C15 C 0.36666(8) 0.32278(19) 0.37054(5) 0.0193(2) Uani 1 1 d . . . . . 
H15A H 0.3193 0.1928 0.3585 0.023 Uiso 1 1 calc R U . . . 
C16 C 0.44541(8) 0.3224(2) 0.34214(6) 0.0235(2) Uani 1 1 d . . . . . 
H16A H 0.4519 0.1914 0.3117 0.028 Uiso 1 1 calc R U . . . 
C17 C 0.51400(8) 0.5130(2) 0.35839(6) 0.0241(2) Uani 1 1 d . . . . . 
H17A H 0.5675 0.5133 0.3390 0.029 Uiso 1 1 calc R U . . . 
C18 C 0.50415(8) 0.7033(2) 0.40314(6) 0.0221(2) Uani 1 1 d . . . . . 
H18A H 0.5505 0.8354 0.4138 0.027 Uiso 1 1 calc R U . . . 
C19 C 0.42670(7) 0.70156(19) 0.43243(5) 0.0182(2) Uani 1 1 d . . . . . 
H19A H 0.4214 0.8313 0.4638 0.022 Uiso 1 1 calc R U . . . 
H1 H 0.039(2) 1.005(5) 0.4702(14) 0.104(9) Uiso 1 1 d . . . . . 
  
loop_ 
 _atom_site_aniso_label 
 _atom_site_aniso_U_11 
 _atom_site_aniso_U_22 
 _atom_site_aniso_U_33 
 _atom_site_aniso_U_23 
 _atom_site_aniso_U_13 
 _atom_site_aniso_U_12 
N1 0.0282(5) 0.0392(6) 0.0174(4) 0.0036(4) 0.0084(4) 0.0201(4) 
C2 0.0135(4) 0.0197(5) 0.0146(4) 0.0009(3) 0.0054(3) 0.0006(3) 
C3 0.0130(4) 0.0155(4) 0.0130(4) 0.0008(3) 0.0046(3) 0.0012(3) 
C4 0.0175(5) 0.0219(5) 0.0133(4) 0.0004(3) 0.0041(3) 0.0028(4) 
C5 0.0174(4) 0.0256(5) 0.0149(4) 0.0037(4) 0.0036(3) 0.0042(4) 
C6 0.0169(5) 0.0362(6) 0.0204(5) 0.0065(4) 0.0055(4) 0.0095(4) 
C7 0.0142(4) 0.0187(5) 0.0152(4) 0.0000(3) 0.0069(3) 0.0029(3) 
C8 0.0216(5) 0.0176(5) 0.0188(5) 0.0009(4) 0.0088(4) 0.0003(4) 
C9 0.0214(5) 0.0210(5) 0.0198(5) -0.0043(4) 0.0071(4) -0.0016(4) 
C10 0.0193(5) 0.0259(5) 0.0140(4) -0.0008(4) 0.0068(4) 0.0044(4) 
C11 0.0218(5) 0.0220(5) 0.0179(5) 0.0036(4) 0.0099(4) 0.0025(4) 
C12 0.0175(4) 0.0196(5) 0.0181(4) -0.0004(4) 0.0082(4) -0.0008(4) 
C13 0.0160(4) 0.0163(4) 0.0152(4) 0.0023(3) 0.0057(3) 0.0023(3) 
C14 0.0148(4) 0.0180(5) 0.0132(4) 0.0039(3) 0.0036(3) 0.0044(3) 
C15 0.0215(5) 0.0177(5) 0.0180(4) 0.0016(4) 0.0058(4) 0.0032(4) 
C16 0.0291(5) 0.0237(5) 0.0200(5) 0.0024(4) 0.0114(4) 0.0105(4) 
C17 0.0203(5) 0.0311(6) 0.0243(5) 0.0096(4) 0.0120(4) 0.0103(4) 
C18 0.0154(5) 0.0251(5) 0.0248(5) 0.0063(4) 0.0055(4) 0.0021(4) 
C19 0.0160(4) 0.0196(5) 0.0175(4) 0.0004(4) 0.0039(3) 0.0032(4) 
  
_geom_special_details 
; 
 All esds (except the esd in the dihedral angle between two l.s. planes) 
 are estimated using the full covariance matrix.  The cell esds are taken 
 into account individually in the estimation of esds in distances, angles 
 and torsion angles; correlations between esds in cell parameters are only 
 used when they are defined by crystal symmetry.  An approximate (isotropic) 
 treatment of cell esds is used for estimating esds involving l.s. planes. 
; 
  
loop_ 
 _geom_bond_atom_site_label_1 
 _geom_bond_atom_site_label_2 
 _geom_bond_distance 
 _geom_bond_site_symmetry_2 
 _geom_bond_publ_flag 
N1 C6 1.4698(13) . ? 
N1 C2 1.4720(13) . ? 
N1 H1 0.72(3) . ? 
C2 C7 1.5165(12) . ? 
C2 C3 1.5452(12) . ? 
C2 H2A 1.0000 . ? 
C3 C4 1.5307(12) . ? 
C3 C13 1.5348(13) . ? 
C3 H3A 1.0000 . ? 
C4 C5 1.5246(14) . ? 
C4 H4A 0.9900 . ? 
C4 H4B 0.9900 . ? 
C5 C6 1.5266(14) . ? 
C5 H5A 0.9900 . ? 
C5 H5B 0.9900 . ? 
C6 H6A 0.9900 . ? 
C6 H6B 0.9900 . ? 
C7 C12 1.3942(14) . ? 
C7 C8 1.3971(14) . ? 
C8 C9 1.3903(14) . ? 
C8 H8A 0.9500 . ? 
C9 C10 1.3919(15) . ? 
C9 H9A 0.9500 . ? 
C10 C11 1.3883(15) . ? 
C10 H10A 0.9500 . ? 
C11 C12 1.3961(14) . ? 
C11 H11A 0.9500 . ? 
C12 H12A 0.9500 . ? 
C13 C14 1.5152(12) . ? 
C13 H13A 0.9900 . ? 
C13 H13B 0.9900 . ? 
C14 C15 1.3939(14) . ? 
C14 C19 1.3971(14) . ? 
C15 C16 1.3970(14) . ? 
C15 H15A 0.9500 . ? 
C16 C17 1.3862(17) . ? 
C16 H16A 0.9500 . ? 
C17 C18 1.3873(16) . ? 
C17 H17A 0.9500 . ? 
C18 C19 1.3915(14) . ? 
C18 H18A 0.9500 . ? 
C19 H19A 0.9500 . ? 
  
loop_ 
 _geom_angle_atom_site_label_1 
 _geom_angle_atom_site_label_2 
 _geom_angle_atom_site_label_3 
 _geom_angle 
 _geom_angle_site_symmetry_1 
 _geom_angle_site_symmetry_3 
 _geom_angle_publ_flag 
C6 N1 C2 112.26(9) . . ? 
C6 N1 H1 117(2) . . ? 
C2 N1 H1 117(2) . . ? 
N1 C2 C7 109.84(8) . . ? 
N1 C2 C3 109.99(8) . . ? 
C7 C2 C3 112.06(7) . . ? 
N1 C2 H2A 108.3 . . ? 
C7 C2 H2A 108.3 . . ? 
C3 C2 H2A 108.3 . . ? 
C4 C3 C13 111.35(7) . . ? 
C4 C3 C2 109.24(7) . . ? 
C13 C3 C2 112.20(7) . . ? 
C4 C3 H3A 108.0 . . ? 
C13 C3 H3A 108.0 . . ? 
C2 C3 H3A 108.0 . . ? 
C5 C4 C3 111.68(8) . . ? 
C5 C4 H4A 109.3 . . ? 
C3 C4 H4A 109.3 . . ? 
C5 C4 H4B 109.3 . . ? 
C3 C4 H4B 109.3 . . ? 
H4A C4 H4B 107.9 . . ? 
C4 C5 C6 110.41(8) . . ? 
C4 C5 H5A 109.6 . . ? 
C6 C5 H5A 109.6 . . ? 
C4 C5 H5B 109.6 . . ? 
C6 C5 H5B 109.6 . . ? 
H5A C5 H5B 108.1 . . ? 
N1 C6 C5 111.23(8) . . ? 
N1 C6 H6A 109.4 . . ? 
C5 C6 H6A 109.4 . . ? 
N1 C6 H6B 109.4 . . ? 
C5 C6 H6B 109.4 . . ? 
H6A C6 H6B 108.0 . . ? 
C12 C7 C8 118.59(9) . . ? 
C12 C7 C2 120.74(9) . . ? 
C8 C7 C2 120.65(9) . . ? 
C9 C8 C7 120.76(9) . . ? 
C9 C8 H8A 119.6 . . ? 
C7 C8 H8A 119.6 . . ? 
C8 C9 C10 120.24(10) . . ? 
C8 C9 H9A 119.9 . . ? 
C10 C9 H9A 119.9 . . ? 
C11 C10 C9 119.53(9) . . ? 
C11 C10 H10A 120.2 . . ? 
C9 C10 H10A 120.2 . . ? 
C10 C11 C12 120.14(9) . . ? 
C10 C11 H11A 119.9 . . ? 
C12 C11 H11A 119.9 . . ? 
C7 C12 C11 120.74(9) . . ? 
C7 C12 H12A 119.6 . . ? 
C11 C12 H12A 119.6 . . ? 
C14 C13 C3 113.17(8) . . ? 
C14 C13 H13A 108.9 . . ? 
C3 C13 H13A 108.9 . . ? 
C14 C13 H13B 108.9 . . ? 
C3 C13 H13B 108.9 . . ? 
H13A C13 H13B 107.8 . . ? 
C15 C14 C19 118.35(9) . . ? 
C15 C14 C13 121.60(9) . . ? 
C19 C14 C13 120.03(8) . . ? 
C14 C15 C16 120.83(10) . . ? 
C14 C15 H15A 119.6 . . ? 
C16 C15 H15A 119.6 . . ? 
C17 C16 C15 120.10(10) . . ? 
C17 C16 H16A 119.9 . . ? 
C15 C16 H16A 119.9 . . ? 
C16 C17 C18 119.62(9) . . ? 
C16 C17 H17A 120.2 . . ? 
C18 C17 H17A 120.2 . . ? 
C17 C18 C19 120.25(10) . . ? 
C17 C18 H18A 119.9 . . ? 
C19 C18 H18A 119.9 . . ? 
C18 C19 C14 120.84(9) . . ? 
C18 C19 H19A 119.6 . . ? 
C14 C19 H19A 119.6 . . ? 
  
_refine_diff_density_max    0.335 
_refine_diff_density_min   -0.202 
_refine_diff_density_rms    0.038 
  
_shelx_res_file 
; 
  
    weij1.res created by SHELXL-2014/7 
  
  
TITL face.res in P2(1)/c 
CELL 0.71073 14.1447 5.4777 19.1702 90.000 110.005 90.000 
ZERR 4.00 0.0003 0.0001 0.0004 0.000 0.001 0.000 
LATT 1 
SYMM -x, y+1/2, -z+1/2 
SFAC C H N 
UNIT 72 84 4 
TEMP -173.140 
SIZE 0.088 0.182 0.486 
  
ACTA 50 
L.S. 8 
list 4 
FMAP 2 
PLAN 20 
BOND $H 
  
WGHT    0.050800    0.434000 
FVAR       0.34299 
N1    3    0.063979    0.962833    0.445321    11.00000    0.02824    0.03924 = 
         0.01741    0.00362    0.00840    0.02010 
C2    1    0.128090    0.745108    0.468586    11.00000    0.01347    0.01968 = 
         0.01461    0.00085    0.00540    0.00055 
AFIX  13 
H2A   2    0.084042    0.597269    0.455485    11.00000   -1.20000 
AFIX   0 
C3    1    0.203441    0.732271    0.426333    11.00000    0.01296    0.01554 = 
         0.01302    0.00077    0.00458    0.00117 
AFIX  13 
H3A   2    0.245760    0.883149    0.438283    11.00000   -1.20000 
AFIX   0 
C4    1    0.145337    0.731015    0.342728    11.00000    0.01748    0.02189 = 
         0.01325    0.00036    0.00415    0.00277 
AFIX  23 
H4A   2    0.193605    0.734905    0.315595    11.00000   -1.20000 
H4B   2    0.105959    0.578113    0.329215    11.00000   -1.20000 
AFIX   0 
C5    1    0.074394    0.948838    0.319212    11.00000    0.01738    0.02558 = 
         0.01488    0.00369    0.00365    0.00418 
AFIX  23 
H5A   2    0.033221    0.933742    0.266000    11.00000   -1.20000 
H5B   2    0.114107    1.101280    0.325855    11.00000   -1.20000 
AFIX   0 
C6    1    0.005545    0.961046    0.365477    11.00000    0.01685    0.03623 = 
         0.02043    0.00650    0.00550    0.00948 
AFIX  23 
H6A   2   -0.036107    1.110614    0.352410    11.00000   -1.20000 
H6B   2   -0.040228    0.818466    0.353803    11.00000   -1.20000 
AFIX   0 
C7    1    0.180762    0.748430    0.552050    11.00000    0.01420    0.01868 = 
         0.01521   -0.00001    0.00692    0.00295 
C8    1    0.245347    0.939738    0.586191    11.00000    0.02163    0.01762 = 
         0.01880    0.00092    0.00881    0.00030 
AFIX  43 
H8A   2    0.254105    1.072405    0.557066    11.00000   -1.20000 
AFIX   0 
C9    1    0.296947    0.938178    0.662302    11.00000    0.02145    0.02097 = 
         0.01980   -0.00432    0.00709   -0.00162 
AFIX  43 
H9A   2    0.340823    1.069151    0.684772    11.00000   -1.20000 
AFIX   0 
C10   1    0.284555    0.745419    0.705696    11.00000    0.01934    0.02594 = 
         0.01403   -0.00075    0.00676    0.00438 
AFIX  43 
H10A  2    0.320168    0.743820    0.757650    11.00000   -1.20000 
AFIX   0 
C11   1    0.219783    0.555517    0.672519    11.00000    0.02176    0.02201 = 
         0.01792    0.00364    0.00990    0.00251 
AFIX  43 
H11A  2    0.210529    0.424190    0.701908    11.00000   -1.20000 
AFIX   0 
C12   1    0.168217    0.557122    0.596055    11.00000    0.01747    0.01961 = 
         0.01806   -0.00043    0.00822   -0.00084 
AFIX  43 
H12A  2    0.124087    0.426397    0.573763    11.00000   -1.20000 
AFIX   0 
C13   1    0.273795    0.510935    0.449672    11.00000    0.01600    0.01631 = 
         0.01522    0.00228    0.00574    0.00230 
AFIX  23 
H13A  2    0.304595    0.508818    0.504463    11.00000   -1.20000 
H13B  2    0.233610    0.359852    0.434331    11.00000   -1.20000 
AFIX   0 
C14   1    0.356663    0.511456    0.416313    11.00000    0.01480    0.01797 = 
         0.01324    0.00386    0.00364    0.00444 
C15   1    0.366663    0.322775    0.370541    11.00000    0.02148    0.01773 = 
         0.01801    0.00163    0.00578    0.00319 
AFIX  43 
H15A  2    0.319341    0.192801    0.358506    11.00000   -1.20000 
AFIX   0 
C16   1    0.445406    0.322417    0.342144    11.00000    0.02909    0.02370 = 
         0.01998    0.00243    0.01137    0.01053 
AFIX  43 
H16A  2    0.451949    0.191363    0.311657    11.00000   -1.20000 
AFIX   0 
C17   1    0.514004    0.513000    0.358386    11.00000    0.02029    0.03115 = 
         0.02429    0.00961    0.01198    0.01027 
AFIX  43 
H17A  2    0.567456    0.513264    0.338979    11.00000   -1.20000 
AFIX   0 
C18   1    0.504150    0.703342    0.403143    11.00000    0.01540    0.02514 = 
         0.02484    0.00630    0.00553    0.00209 
AFIX  43 
H18A  2    0.550457    0.835408    0.413841    11.00000   -1.20000 
AFIX   0 
C19   1    0.426699    0.701560    0.432425    11.00000    0.01597    0.01962 = 
         0.01754    0.00044    0.00395    0.00319 
AFIX  43 
H19A  2    0.421376    0.831261    0.463772    11.00000   -1.20000 
AFIX   0 
H1    2    0.038771    1.005349    0.470179    11.00000    0.10398 
  
HKLF 4 1 1 0 0 0 1 0 0 0 1 
  
REM  face.res in P2(1)/c 
REM R1 =  0.0382 for    2911 Fo > 4sig(Fo)  and  0.0440 for all    3358 data 
REM    176 parameters refined using      0 restraints 
  
END 
  
WGHT      0.0507      0.4344 
  
REM Highest difference peak  0.335,  deepest hole -0.202,  1-sigma level  0.038 
Q1    1   0.1006  1.1156  0.4628  11.00000  0.05    0.33 
Q2    1   0.1568  0.7513  0.5131  11.00000  0.05    0.33 
Q3    1   0.1696  0.7320  0.4496  11.00000  0.05    0.33 
Q4    1   0.1773  0.7334  0.3863  11.00000  0.05    0.31 
Q5    1   0.2412  0.6269  0.4384  11.00000  0.05    0.30 
Q6    1   0.3159  0.5119  0.4307  11.00000  0.05    0.29 
Q7    1   0.3776  0.6246  0.4137  11.00000  0.05    0.28 
Q8    1   0.1812  0.6519  0.5737  11.00000  0.05    0.27 
Q9    1   0.5011  0.6045  0.3764  11.00000  0.05    0.27 
Q10   1   0.2207  0.8312  0.5697  11.00000  0.05    0.27 
Q11   1   0.0393  0.9535  0.3430  11.00000  0.05    0.27 
Q12   1   0.2922  0.8376  0.6804  11.00000  0.05    0.26 
Q13   1   0.1102  0.8371  0.3339  11.00000  0.05    0.25 
Q14   1   0.1951  0.5711  0.6357  11.00000  0.05    0.25 
Q15   1   0.4583  0.7051  0.4102  11.00000  0.05    0.25 
Q16   1   0.3696  0.4098  0.3994  11.00000  0.05    0.25 
Q17   1   0.2625  0.9516  0.6258  11.00000  0.05    0.24 
Q18   1   0.4107  0.3320  0.3587  11.00000  0.05    0.24 
Q19   1   0.4682  0.4412  0.3420  11.00000  0.05    0.23 
Q20   1   0.0998  0.8618  0.4567  11.00000  0.05    0.21 
; 
_shelx_res_checksum   19657 
  
_shelx_hkl_file 
; 
   0   0   1    0.00    0.03 
   0   0  -2  406.72    2.07 
   0   0   2  410.16    2.14 
   0   0  -3   -0.02    0.10 
   0   0   3    0.01    0.10 
   0   0   5    0.42    0.14 
   0   0   6   -0.01    0.14 
   0   0   7    0.06    0.15 
   0   0   8  785.01    4.52 
   0   0  10  275.10    1.64 
   0   0  12   48.41    0.79 
   0   0  13    0.67    0.22 
   0   0  13    0.28    0.25 
   0   0  14   16.30    0.57 
   0   0  14   15.99    0.64 
   0   0 -15    0.16    0.29 
   0   0  15    0.50    0.24 
   0   0  15    0.21    0.27 
   0   0 -16    7.29    0.52 
   0   0 -16    7.83    0.61 
   0   0  16    7.74    0.50 
   0   0  16    7.66    0.59 
   0   0 -17    0.11    0.27 
   0   0 -17    0.09    0.26 
   0   0 -17   -0.20    0.32 
   0   0  17    0.02    0.26 
   0   0  17    0.19    0.32 
   0   0  17    0.23    0.33 
   0   0 -18    0.41    0.34 
   0   0 -18    0.42    0.30 
   0   0 -18    0.25    0.34 
   0   0  18    0.17    0.32 
   0   0 -19   -0.38    0.27 
   0   0 -19   -0.02    0.29 
   0   0 -19   -0.42    0.34 
   0   0  19   -0.15    0.32 
   0   0 -20    1.76    0.45 
   0   0 -20    2.38    0.43 
   0   0 -20    2.26    0.48 
   0   0  20    2.65    0.49 
   0   0 -21   -0.11    0.30 
   0   0 -21    0.07    0.32 
   0   0 -21    0.18    0.40 
   0   0  21   -0.23    0.36 
   0   0 -22    6.05    0.71 
   0   0 -22    6.78    0.65 
   0   0 -22    6.58    0.77 
   0   0  22    6.45    0.73 
   0   0 -23    0.13    0.40 
   0   0 -23    0.11    0.44 
   0   0  23   -0.05    0.43 
   0   1  -2   23.71    0.40 
   0  -1  -3    0.54    0.12 
   0   1  -3    0.46    0.17 
   0  -1   4  431.54    2.84 
   0   1  -4  421.97    2.44 
   0   1   4  424.96    2.28 
   0  -1   5   82.33    0.85 
   0   1  -5   81.05    0.83 
   0   1   5   82.23    0.55 
   0  -1   6   33.94    0.61 
   0   1   6   33.69    0.40 
   0  -1   7    0.67    0.20 
   0  -1   7    0.76    0.19 
   0   1   7    0.66    0.14 
   0  -1   8    0.28    0.20 
   0   1   8    0.19    0.13 
   0  -1   9    8.41    0.44 
   0   1   9    8.78    0.30 
   0  -1  10   21.41    0.60 
   0  -1  10   23.52    0.70 
   0   1  10   22.34    0.45 
   0  -1  11    4.60    0.39 
   0  -1  11    4.85    0.47 
   0   1  11    4.61    0.29 
   0  -1  12    0.15    0.23 
   0  -1  12    0.33    0.27 
   0  -1  12    0.09    0.26 
   0   1 -12    0.22    0.24 
   0   1  12    0.23    0.16 
   0  -1  13    7.44    0.50 
   0  -1  13    7.53    0.57 
   0  -1  13    7.23    0.54 
   0   1 -13    8.39    0.53 
   0   1  13    7.77    0.37 
   0  -1 -14   18.36    0.70 
   0  -1  14   17.30    0.67 
   0  -1  14   18.39    0.78 
   0  -1  14   18.33    0.74 
   0   1 -14   17.85    0.71 
   0   1 -14   17.70    0.79 
   0   1  14   17.25    0.51 
   0   1  14   18.49    0.67 
   0  -1 -15    1.50    0.35 
   0  -1 -15    1.58    0.35 
   0  -1  15    1.88    0.35 
   0  -1  15    1.51    0.39 
   0  -1  15    1.42    0.37 
   0   1 -15    1.48    0.37 
   0   1  15    1.51    0.26 
   0   1  15    1.85    0.35 
   0   1  15    1.26    0.59 
   0  -1 -16    1.73    0.36 
   0  -1 -16    1.50    0.36 
   0  -1  16    1.52    0.35 
   0  -1  16    1.46    0.38 
   0  -1  16    1.38    0.38 
   0   1 -16    0.90    0.34 
   0   1  16    2.21    0.38 
   0   1  16    1.50    0.38 
   0  -1 -17    8.83    0.55 
   0  -1 -17    8.87    0.62 
   0  -1 -17    8.59    0.64 
   0  -1  17    8.56    0.60 
   0  -1  17    9.53    0.70 
   0   1 -17    7.99    0.61 
   0   1 -17    8.80    0.68 
   0   1  17    8.71    0.63 
   0   1  17    8.64    0.66 
   0  -1 -18    7.49    0.62 
   0  -1 -18    7.38    0.65 
   0  -1  18    7.28    0.61 
   0  -1  18    8.97    0.71 
   0   1 -18    7.18    0.61 
   0   1 -18    6.99    0.66 
   0   1  18    7.62    0.61 
   0   1  18    7.55    0.67 
   0  -1 -19    1.67    0.40 
   0  -1 -19    1.57    0.43 
   0  -1  19    1.92    0.41 
   0  -1  19    2.24    0.47 
   0   1 -19    2.33    0.46 
   0   1 -19    1.14    0.42 
   0   1  19    1.94    0.42 
   0   1  19    1.62    0.41 
   0  -1 -20    1.65    0.43 
   0  -1 -20    1.63    0.46 
   0  -1 -20    2.30    0.46 
   0  -1  20    1.57    0.48 
   0   1 -20    1.55    0.43 
   0   1 -20    1.28    0.45 
   0   1  20    1.48    0.42 
   0   1  20    1.71    0.45 
   0  -1 -21    0.73    0.40 
   0  -1 -21    0.77    0.41 
   0  -1  21    0.76    0.44 
   0   1 -21    1.03    0.42 
   0   1 -21    0.88    0.46 
   0   1  21    1.16    0.41 
   0   1  21    0.74    0.41 
   0  -1 -22   -0.14    0.35 
   0  -1 -22   -0.02    0.40 
   0  -1  22    0.39    0.45 
   0   1 -22   -0.13    0.38 
   0   1 -22    0.09    0.42 
   0   1  22    0.22    0.42 
   0  -1 -23   -0.24    0.39 
   0  -1 -23    0.47    0.40 
   0  -1 -23    0.08    0.43 
   0  -1  23    0.39    0.49 
   0   1 -23    0.27    0.44 
   0   1 -23    0.61    0.48 
   0   2   0   30.12    0.54 
   0   2  -1   24.11    0.52 
   0   2   1   23.97    0.47 
   0  -2   2    0.52    0.18 
   0   2  -2    0.32    0.19 
   0   2   2    0.66    0.16 
   0  -2   3    4.07    0.28 
   0   2  -3    3.64    0.34 
   0   2   3    4.06    0.24 
   0  -2   4   81.78    0.79 
   0   2  -4   77.65    0.97 
   0  -2   5   37.98    0.57 
   0   2  -5   37.31    0.73 
   0  -2   6    5.17    0.40 
   0  -2   6    4.93    0.29 
   0   2  -6    4.61    0.39 
   0  -2   7    6.63    0.45 
   0  -2   7    6.79    0.32 
   0   2  -7    6.00    0.42 
   0  -2   8    0.45    0.24 
   0  -2   8    0.45    0.18 
   0  -2   8    0.30    0.25 
   0  -2   9   21.63    0.69 
   0  -2   9   23.66    0.51 
   0  -2   9   23.82    0.72 
   0  -2  10    0.11    0.25 
   0  -2  10    0.41    0.17 
   0  -2  10    0.24    0.28 
   0  -2  10    0.57    0.27 
   0   2 -10    0.67    0.28 
   0  -2  11    3.36    0.39 
   0  -2  11    3.46    0.33 
   0  -2  11    3.57    0.44 
   0  -2  11    3.18    0.39 
   0   2 -11    3.58    0.40 
   0   2  11    3.31    0.24 
   0  -2 -12   19.74    0.73 
   0  -2  12   19.73    0.73 
   0  -2  12   20.43    0.76 
   0  -2  12   20.71    0.77 
   0   2 -12   20.37    0.74 
   0   2  12   19.81    0.43 
   0  -2 -13    2.01    0.38 
   0  -2  13    2.04    0.38 
   0  -2  13    2.70    0.44 
   0  -2  13    2.01    0.37 
   0   2 -13    1.94    0.36 
   0   2 -13    1.58    0.39 
   0   2  13    2.25    0.53 
   0   2  13    1.96    0.36 
   0  -2 -14    7.56    0.58 
   0  -2  14    9.11    0.66 
   0  -2  14    8.27    0.68 
   0  -2  14    7.89    0.63 
   0   2 -14    8.17    0.61 
   0   2 -14    8.56    0.62 
   0   2  14    8.81    0.53 
   0   2  14    8.17    0.60 
   0  -2 -15   14.85    0.74 
   0  -2 -15   15.94    0.72 
   0  -2  15   15.55    0.75 
   0  -2  15   15.86    0.84 
   0  -2  15   15.29    0.80 
   0   2 -15   14.97    0.76 
   0   2 -15   15.45    0.77 
   0   2  15   15.55    0.66 
   0  -2 -16    2.61    0.45 
   0  -2 -16    2.95    0.42 
   0  -2  16    2.35    0.44 
   0  -2  16    2.56    0.45 
   0  -2  16    3.21    0.51 
   0   2 -16    2.78    0.44 
   0   2 -16    2.88    0.47 
   0   2 -16    2.37    0.44 
   0   2  16    2.84    0.40 
   0   2  16    2.73    0.45 
   0  -2 -17   -0.06    0.32 
   0  -2 -17    0.13    0.30 
   0  -2 -17    0.36    0.32 
   0  -2  17    0.15    0.34 
   0  -2  17   -0.36    0.39 
   0  -2  17    0.38    0.37 
   0   2 -17    0.13    0.32 
   0   2 -17   -0.01    0.33 
   0   2 -17   -0.36    0.32 
   0   2 -17   -0.06    0.30 
   0   2  17    0.08    0.28 
   0   2  17    0.34    0.36 
   0  -2 -18   -0.01    0.32 
   0  -2 -18   -0.04    0.32 
   0  -2 -18   -0.19    0.31 
   0  -2  18   -0.28    0.34 
   0  -2  18   -0.30    0.40 
   0  -2  18    0.32    0.40 
   0   2 -18    0.04    0.33 
   0   2 -18    0.32    0.36 
   0   2 -18    0.40    0.38 
   0   2 -18    0.05    0.31 
   0   2  18    0.00    0.29 
   0   2  18    0.16    0.36 
   0  -2 -19    0.31    0.35 
   0  -2 -19    0.46    0.38 
   0  -2 -19    0.40    0.34 
   0  -2 -19    0.37    0.35 
   0  -2  19    0.14    0.36 
   0  -2  19    0.05    0.44 
   0  -2  19    0.47    0.44 
   0   2 -19   -0.06    0.33 
   0   2 -19    0.16    0.40 
   0   2 -19    0.68    0.36 
   0   2  19    0.42    0.40 
   0  -2 -20   -0.14    0.34 
   0  -2 -20   -0.12    0.37 
   0  -2 -20   -0.11    0.35 
   0  -2 -20    0.01    0.34 
   0  -2  20   -0.07    0.37 
   0  -2  20    0.36    0.48 
   0  -2  20   -0.42    0.40 
   0   2 -20    0.03    0.35 
   0   2 -20    0.27    0.43 
   0   2  20   -0.04    0.37 
   0  -2 -21    0.95    0.44 
   0  -2 -21    1.15    0.43 
   0  -2 -21    1.05    0.42 
   0  -2  21    1.58    0.47 
   0  -2  21    1.04    0.50 
   0   2 -21    1.53    0.47 
   0   2 -21    1.39    0.49 
   0   2  21    1.70    0.49 
   0  -2 -22   83.60    1.87 
   0  -2 -22   83.89    1.86 
   0  -2 -22   80.56    1.74 
   0  -2  22   86.95    1.97 
   0   2 -22   82.35    1.89 
   0   2 -22   80.65    1.94 
   0   2  22   85.03    1.81 
   0   3   0   -0.06    0.18 
   0   3  -1   32.24    0.70 
   0   3   1   33.40    0.66 
   0  -3   2   50.31    0.81 
   0   3  -2   48.89    0.86 
   0   3   2   49.32    0.75 
   0  -3   3   32.60    0.66 
   0   3  -3   31.83    0.75 
   0   3   3   32.30    0.60 
   0  -3   4   20.20    0.53 
   0   3  -4   19.96    0.64 
   0   3   4   19.66    0.47 
   0  -3   5    4.99    0.34 
   0   3  -5    4.74    0.45 
   0   3   5    4.98    0.29 
   0  -3   6   38.62    0.89 
   0  -3   6   39.67    0.70 
   0  -3   6   40.86    0.88 
   0   3  -6   38.42    0.89 
   0   3  -6   38.97    0.87 
   0   3   6   38.78    0.55 
   0  -3   7    1.59    0.32 
   0  -3   7    1.83    0.24 
   0  -3   7    1.55    0.32 
   0   3  -7    2.01    0.35 
   0   3  -7    1.73    0.32 
   0   3   7    1.69    0.21 
   0  -3   8    1.20    0.32 
   0  -3   8    1.31    0.23 
   0  -3   8    1.23    0.33 
   0   3  -8    0.84    0.26 
   0  -3  -9    3.45    0.44 
   0  -3   9    3.27    0.41 
   0  -3   9    3.57    0.34 
   0  -3   9    3.75    0.45 
   0   3  -9    3.58    0.42 
   0   3   9    3.16    0.45 
   0  -3 -10   47.77    1.08 
   0  -3  10   45.32    1.07 
   0  -3  10   48.42    0.80 
   0  -3  10   48.30    1.09 
   0   3 -10   46.46    1.08 
   0   3  10   45.89    1.06 
   0  -3 -11    2.05    0.37 
   0  -3  11    1.77    0.38 
   0  -3  11    2.59    0.30 
   0  -3  11    2.47    0.43 
   0   3 -11    2.04    0.37 
   0   3  11    2.12    0.40 
   0  -3 -12   12.14    0.65 
   0  -3  12   13.23    0.74 
   0  -3  12   12.80    0.70 
   0  -3  12   12.86    0.73 
   0   3 -12   13.07    0.73 
   0   3 -12   11.91    0.67 
   0   3  12   13.27    0.57 
   0   3  12   12.78    0.72 
   0  -3 -13    0.85    0.33 
   0  -3  13    0.81    0.39 
   0  -3  13    1.16    0.38 
   0  -3  13    0.65    0.37 
   0   3 -13    1.28    0.39 
   0   3 -13    1.11    0.37 
   0   3 -13    0.95    0.34 
   0   3  13    1.15    0.29 
   0   3  13    1.32    0.38 
   0  -3 -14  177.68    2.24 
   0  -3 -14  184.02    2.04 
   0  -3  14  184.32    2.27 
   0  -3  14  193.26    2.37 
   0  -3  14  184.31    2.30 
   0   3 -14  179.51    2.39 
   0   3 -14  182.98    2.28 
   0   3 -14  177.39    2.20 
   0   3 -14  183.52    2.23 
   0   3  14  184.25    1.89 
   0   3  14  182.32    2.24 
   0  -3 -15    3.06    0.49 
   0  -3 -15    3.05    0.42 
   0  -3  15    2.90    0.49 
   0  -3  15    2.76    0.51 
   0  -3  15    2.18    0.49 
   0   3 -15    2.89    0.45 
   0   3 -15    2.37    0.47 
   0   3 -15    2.48    0.45 
   0   3 -15    2.80    0.48 
   0   3  15    2.77    0.47 
   0  -3 -16    0.39    0.38 
   0  -3 -16    0.31    0.30 
   0  -3  16    0.13    0.37 
   0  -3  16    0.06    0.37 
   0  -3  16   -0.13    0.39 
   0   3 -16   -0.08    0.29 
   0   3 -16    0.17    0.38 
   0   3 -16   -0.23    0.34 
   0   3 -16    0.09    0.34 
   0   3  16   -0.39    0.34 
   0  -3 -17    3.71    0.55 
   0  -3 -17    3.96    0.51 
   0  -3  17    3.29    0.55 
   0  -3  17    2.89    0.57 
   0  -3  17    3.49    0.57 
   0   3 -17    3.31    0.48 
   0   3 -17    3.72    0.57 
   0   3 -17    3.37    0.56 
   0   3 -17    3.47    0.53 
   0   3  17    3.68    0.55 
   0  -3 -18    1.40    0.44 
   0  -3 -18    1.43    0.40 
   0  -3 -18    1.79    0.46 
   0  -3  18    1.40    0.47 
   0  -3  18    2.27    0.59 
   0  -3  18    1.41    0.51 
   0   3 -18    1.10    0.41 
   0   3 -18    1.91    0.50 
   0   3 -18    1.70    0.49 
   0   3 -18    1.87    0.47 
   0   3  18    0.81    0.45 
   0  -3 -19    0.29    0.41 
   0  -3 -19    0.21    0.39 
   0  -3 -19   -0.16    0.31 
   0  -3 -19    0.28    0.37 
   0  -3  19    0.00    0.42 
   0  -3  19   -0.41    0.43 
   0  -3  19   -0.14    0.44 
   0   3 -19    0.06    0.34 
   0   3 -19    0.52    0.43 
   0   3 -19    0.25    0.41 
   0   3 -19   -0.04    0.37 
   0   3  19    0.08    0.42 
   0  -3 -20    0.18    0.42 
   0  -3 -20    0.12    0.44 
   0  -3 -20    0.56    0.39 
   0  -3 -20    0.08    0.40 
   0  -3  20   -0.01    0.42 
   0  -3  20    0.44    0.51 
   0  -3  20   -0.10    0.48 
   0   3 -20    0.27    0.38 
   0   3 -20    0.99    0.48 
   0   3 -20    0.56    0.44 
   0   3 -20    0.31    0.39 
   0   3  20    0.04    0.44 
   0  -3 -21    9.11    0.87 
   0  -3 -21    8.25    0.82 
   0  -3 -21    8.04    0.75 
   0  -3 -21    8.02    0.75 
   0  -3  21    8.59    0.88 
   0  -3  21    8.18    0.97 
   0  -3  21    7.93    0.92 
   0   3 -21    7.98    0.77 
   0   3 -21    8.46    0.86 
   0   3 -21    7.44    0.91 
   0   3 -21    7.91    0.78 
   0   3  21    7.50    0.90 
   0   4   0  433.84    2.68 
   0   4   0  441.30    2.79 
   0  -4   1    6.92    0.50 
   0   4  -1    6.46    0.52 
   0   4  -1    6.61    0.51 
   0   4   1    6.87    0.48 
   0   4   1    6.17    0.49 
   0  -4   2   40.71    0.87 
   0   4  -2   38.58    0.92 
   0   4  -2   39.25    0.93 
   0   4   2   37.83    0.81 
   0   4   2   37.95    0.86 
   0  -4   3    8.05    0.48 
   0   4  -3    7.76    0.58 
   0   4  -3    7.07    0.54 
   0   4   3    8.51    0.46 
   0   4   3    8.38    0.52 
   0  -4   4    2.36    0.33 
   0   4  -4    1.65    0.36 
   0   4  -4    2.25    0.39 
   0   4   4    1.94    0.28 
   0   4   4    1.78    0.31 
   0  -4   5   14.44    0.56 
   0   4  -5   13.48    0.69 
   0   4  -5   14.27    0.67 
   0   4   5   14.58    0.51 
   0   4   5   13.68    0.59 
   0  -4   6    6.41    0.58 
   0  -4   6    7.39    0.46 
   0  -4   6    8.05    0.58 
   0   4  -6    7.33    0.58 
   0   4   6    7.13    0.40 
   0   4   6    7.30    0.47 
   0  -4   7    1.60    0.39 
   0  -4   7    1.80    0.30 
   0  -4   7    0.97    0.31 
   0   4  -7    1.55    0.38 
   0   4   7    1.68    0.31 
   0  -4   8   46.54    1.17 
   0  -4   8   48.85    0.91 
   0  -4   8   48.15    1.14 
   0   4  -8   46.66    1.15 
   0   4   8   46.46    0.96 
   0  -4   9   29.33    1.00 
   0  -4   9   29.73    0.74 
   0  -4   9   29.78    0.97 
   0   4  -9   27.84    0.96 
   0   4   9   27.39    0.78 
   0  -4 -10   21.10    0.86 
   0  -4  10   20.88    0.90 
   0  -4  10   21.60    0.90 
   0   4 -10   20.66    0.89 
   0   4 -10   20.93    0.82 
   0   4 -10   21.61    0.90 
   0   4  10   22.51    0.74 
   0  -4 -11    0.20    0.31 
   0  -4  11   -0.30    0.33 
   0  -4  11   -0.14    0.34 
   0   4 -11    0.00    0.35 
   0   4 -11    0.02    0.32 
   0   4 -11    0.11    0.36 
   0   4  11    0.01    0.26 
   0  -4 -12    0.46    0.36 
   0  -4  12    1.04    0.42 
   0  -4  12    1.45    0.46 
   0   4 -12    1.11    0.35 
   0   4 -12    1.36    0.43 
   0   4 -12    1.30    0.39 
   0   4 -12    0.81    0.39 
   0   4  12    0.48    0.35 
   0  -4 -13    4.24    0.57 
   0  -4 -13    4.81    0.66 
   0  -4  13    4.23    0.59 
   0  -4  13    4.71    0.62 
   0   4 -13    4.55    0.53 
   0   4 -13    4.62    0.58 
   0   4 -13    4.12    0.53 
   0   4 -13    4.19    0.56 
   0   4  13    4.35    0.56 
   0  -4 -14    7.23    0.69 
   0  -4 -14    6.90    0.72 
   0  -4  14    5.94    0.73 
   0  -4  14    6.40    0.76 
   0  -4  14    6.48    0.74 
   0   4 -14    5.46    0.57 
   0   4 -14    6.47    0.73 
   0   4 -14    6.65    0.66 
   0   4 -14    6.10    0.67 
   0   4  14    5.71    0.56 
   0  -4 -15   13.87    0.86 
   0  -4 -15   14.37    0.87 
   0  -4  15   13.96    0.91 
   0  -4  15   14.03    0.95 
   0  -4  15   13.55    0.93 
   0   4 -15   12.50    0.75 
   0   4 -15   14.56    0.92 
   0   4 -15   14.06    0.85 
   0   4 -15   13.29    0.86 
   0   4  15   12.95    0.79 
   0  -4 -16    2.42    0.54 
   0  -4 -16    2.93    0.51 
   0  -4  16    2.29    0.52 
   0  -4  16    2.92    0.61 
   0  -4  16    2.29    0.56 
   0   4 -16    2.40    0.47 
   0   4 -16    2.52    0.55 
   0   4 -16    2.43    0.52 
   0   4 -16    2.34    0.52 
   0  -4 -17    0.17    0.37 
   0  -4 -17    0.49    0.39 
   0  -4  17    0.46    0.46 
   0  -4  17    0.38    0.48 
   0  -4  17    0.17    0.47 
   0   4 -17    0.12    0.36 
   0   4 -17    0.24    0.46 
   0   4 -17    0.14    0.41 
   0   4 -17    0.08    0.39 
   0  -4 -18    0.95    0.48 
   0  -4 -18    1.31    0.51 
   0  -4  18    0.37    0.49 
   0  -4  18    0.94    0.54 
   0  -4  18    1.02    0.52 
   0   4 -18    0.65    0.43 
   0   4 -18    0.66    0.48 
   0   4 -18    0.82    0.46 
   0   4 -18    0.95    0.47 
   0  -4 -19    2.21    0.58 
   0  -4 -19    2.23    0.56 
   0  -4 -19    1.66    0.51 
   0  -4  19    1.42    0.56 
   0  -4  19    2.40    0.64 
   0  -4  19    2.81    0.66 
   0   4 -19    1.86    0.49 
   0   4 -19    2.67    0.63 
   0   4 -19    2.38    0.57 
   0   4 -19    2.65    0.58 
   0  -5   0    0.08    0.34 
   0   5   0    0.23    0.33 
   0  -5   1   98.07    1.53 
   0   5  -1   95.52    1.56 
   0   5   1   94.37    1.51 
   0  -5   2    9.25    0.61 
   0   5  -2    7.56    0.65 
   0   5   2    8.87    0.63 
   0  -5   3   10.32    0.63 
   0  -5   3   10.92    0.64 
   0   5  -3   10.67    0.71 
   0   5   3   10.15    0.67 
   0  -5   4    1.88    0.42 
   0  -5   4    2.15    0.38 
   0   5  -4    2.11    0.45 
   0   5  -4    1.23    0.40 
   0   5   4    1.72    0.36 
   0  -5   5   17.86    0.85 
   0  -5   5   18.33    0.73 
   0  -5   5   19.05    0.76 
   0   5  -5   17.60    0.84 
   0   5  -5   17.17    0.82 
   0   5   5   17.60    0.73 
   0  -5   6    0.49    0.37 
   0  -5   6    0.40    0.30 
   0  -5   6    0.28    0.33 
   0   5  -6    0.57    0.38 
   0   5  -6    0.44    0.36 
   0   5   6    0.79    0.33 
   0  -5   7    2.94    0.51 
   0  -5   7    3.43    0.42 
   0  -5   7    2.75    0.47 
   0   5  -7    2.54    0.44 
   0   5  -7    3.13    0.53 
   0   5  -7    3.84    0.49 
   0   5  -7    2.44    0.50 
   0   5   7    2.27    0.42 
   0   5   7    2.81    0.42 
   0  -5   8   26.50    1.05 
   0  -5   8   28.26    1.05 
   0   5  -8   25.53    0.91 
   0   5  -8   27.07    1.05 
   0   5  -8   27.51    0.93 
   0   5  -8   26.01    1.02 
   0   5   8   24.17    0.92 
   0   5   8   27.16    0.88 
   0  -5  -9   13.82    0.81 
   0  -5   9   13.08    0.86 
   0  -5   9   12.64    0.82 
   0   5  -9   12.32    0.71 
   0   5  -9   13.46    0.85 
   0   5  -9   13.36    0.76 
   0   5  -9   13.18    0.84 
   0   5   9   11.65    0.72 
   0   5   9   13.08    0.70 
   0  -5 -10    3.62    0.54 
   0  -5  10    3.78    0.56 
   0  -5  10    4.95    0.62 
   0   5 -10    4.47    0.53 
   0   5 -10    4.67    0.62 
   0   5 -10    4.80    0.56 
   0   5 -10    4.14    0.61 
   0   5  10    3.45    0.50 
   0  -5 -11   -0.17    0.38 
   0  -5  11   -0.07    0.38 
   0  -5  11   -0.13    0.42 
   0   5 -11    0.02    0.33 
   0   5 -11    0.13    0.41 
   0   5 -11   -0.08    0.35 
   0   5 -11    0.02    0.35 
   0   5  11   -0.02    0.35 
   0  -5 -12   11.70    0.83 
   0  -5  12   12.90    0.92 
   0  -5  12   11.82    0.90 
   0   5 -12   10.29    0.74 
   0   5 -12   10.77    0.80 
   0   5 -12    9.75    0.78 
   0   5 -12   11.34    0.86 
   0   5  12   10.18    0.75 
   0  -5 -13   19.51    1.00 
   0  -5  13   20.68    1.11 
   0  -5  13   20.31    1.07 
   0   5 -13   19.47    0.91 
   0   5 -13   20.17    1.07 
   0   5 -13   19.27    0.95 
   0   5 -13   20.32    1.05 
   0   5  13   17.31    0.92 
   0  -5 -14    4.83    0.67 
   0  -5  14    4.63    0.68 
   0  -5  14    4.97    0.71 
   0  -5  14    4.22    0.67 
   0   5 -14    4.39    0.57 
   0   5 -14    4.60    0.68 
   0   5 -14    4.66    0.62 
   0   5 -14    4.32    0.64 
   0   5  14    3.13    0.55 
   0  -5 -15    0.14    0.45 
   0  -5  15    0.47    0.49 
   0  -5  15    0.17    0.51 
   0  -5  15    0.34    0.48 
   0   5 -15    0.42    0.40 
   0   5 -15    0.48    0.49 
   0   5 -15    0.67    0.44 
   0   5 -15    0.22    0.43 
   0   5  15    0.52    0.40 
   0  -5 -16    5.64    0.72 
   0  -5  16    4.73    0.70 
   0  -5  16    4.68    0.71 
   0  -5  16    4.51    0.72 
   0   5 -16    3.92    0.59 
   0   5 -16    4.46    0.68 
   0   5 -16    4.98    0.67 
   0   5 -16    4.54    0.69 
   0   5  16    4.14    0.62 
   0  -5 -17    4.59    0.71 
   0  -5 -17    4.73    0.74 
   0  -5  17    4.13    0.71 
   0  -5  17    5.01    0.75 
   0  -5  17    5.27    0.78 
   0   5 -17    4.61    0.64 
   0   5 -17    5.08    0.78 
   0   5 -17    4.29    0.66 
   0   5 -17    4.52    0.72 
   0  -6   0    9.94    0.77 
   0  -6   0    9.28    0.72 
   0   6   0    9.18    0.78 
   0   6   0    9.88    0.69 
   0  -6  -1   -0.16    0.37 
   0  -6   1    0.04    0.34 
   0  -6   1   -0.08    0.35 
   0  -6   1    0.03    0.33 
   0   6  -1   -0.43    0.36 
   0   6  -1   -0.10    0.35 
   0   6   1    0.20    0.38 
   0  -6  -2    0.02    0.39 
   0  -6   2   -0.03    0.35 
   0  -6   2    0.32    0.36 
   0   6  -2    0.08    0.40 
   0   6  -2    0.37    0.38 
   0   6   2    0.03    0.38 
   0  -6   3   15.65    0.89 
   0  -6   3   14.15    0.80 
   0   6  -3   14.71    0.88 
   0   6  -3   13.67    0.83 
   0   6   3   14.99    0.82 
   0  -6   4    7.05    0.75 
   0  -6   4    6.76    0.64 
   0   6  -4    6.68    0.78 
   0   6  -4    6.80    0.75 
   0   6   4    6.72    0.66 
   0  -6   5   11.18    0.82 
   0  -6   5   11.37    0.72 
   0   6  -5   10.68    0.83 
   0   6  -5   10.05    0.79 
   0   6   5    9.87    0.71 
   0   6   5   10.59    0.76 
   0  -6   6   -0.02    0.41 
   0  -6   6   -0.15    0.40 
   0   6  -6    0.18    0.40 
   0   6  -6    0.03    0.41 
   0   6   6   -0.02    0.35 
   0   6   6    0.16    0.37 
   0  -6   7    2.93    0.56 
   0  -6   7    2.31    0.53 
   0   6  -7    2.60    0.56 
   0   6  -7    1.92    0.50 
   0   6   7    2.68    0.51 
   0   6   7    2.31    0.46 
   0  -6  -8   16.93    0.96 
   0  -6   8   16.37    1.02 
   0  -6   8   18.38    1.04 
   0   6  -8   16.02    0.98 
   0   6  -8   16.60    0.98 
   0   6   8   15.38    0.87 
   0  -6  -9    3.73    0.59 
   0  -6   9    3.02    0.61 
   0  -6   9    3.59    0.63 
   0   6  -9    2.61    0.55 
   0   6  -9    2.42    0.54 
   0   6   9    3.27    0.56 
   0  -6 -10    2.89    0.56 
   0  -6  10    3.08    0.62 
   0  -6  10    3.76    0.66 
   0   6 -10    3.80    0.66 
   0   6 -10    3.69    0.95 
   0   6 -10    1.47    0.50 
   0   6  10    2.50    0.52 
   0  -6 -11    8.47    0.82 
   0  -6  11    8.46    0.91 
   0  -6  11    8.50    0.90 
   0   6 -11    7.51    0.74 
   0   6 -11    8.01    0.88 
   0   6 -11    7.90    0.81 
   0   6 -11    8.06    0.85 
   0   6  11    6.98    0.72 
   0  -6 -12    2.10    0.55 
   0  -6  12    2.32    0.61 
   0  -6  12    2.02    0.62 
   0   6 -12    1.19    0.48 
   0   6 -12    1.83    0.55 
   0   6 -12    2.41    0.53 
   0   6 -12    1.49    0.54 
   0   6  12    0.81    0.44 
   0  -6 -13    0.50    0.52 
   0  -6 -13    0.25    0.46 
   0  -6  13   -0.30    0.48 
   0  -6  13    0.37    0.51 
   0   6 -13    0.20    0.40 
   0   6 -13    0.36    0.50 
   0   6 -13   -0.25    0.41 
   0   6 -13    0.20    0.48 
   0   6  13    0.25    0.43 
   0  -7   0   -0.18    0.35 
   0  -7   0    0.06    0.43 
   0   7   0    0.32    0.43 
   0  -7  -1    0.05    0.43 
   0  -7  -1   -0.11    0.42 
   0  -7   1   -0.49    0.33 
   0  -7   1    0.58    0.44 
   0   7  -1   -0.11    0.43 
   0   7   1    0.05    0.43 
   0  -7  -2    0.89    0.51 
   0  -7  -2    1.05    0.50 
   0  -7   2    1.28    0.44 
   0  -7   2    1.81    0.51 
   0   7  -2    0.80    0.48 
   0   7  -2    0.74    0.45 
   0   7   2    1.34    0.48 
   0  -7  -3   -0.13    0.45 
   0  -7  -3   -0.41    0.44 
   0  -7   3   -0.03    0.38 
   0  -7   3   -0.11    0.39 
   0   7  -3    0.02    0.45 
   0   7  -3   -0.19    0.39 
   0   7   3   -0.13    0.38 
   0  -7  -4    2.56    0.62 
   0  -7  -4    2.81    0.62 
   0  -7   4    2.04    0.53 
   0   7  -4    2.35    0.58 
   0   7  -4    1.83    0.53 
   0   7   4    1.91    0.52 
   0   7   4    2.59    0.54 
   0  -7  -5    0.24    0.54 
   0  -7  -5    1.06    0.53 
   0  -7  -5   -0.02    0.44 
   0  -7   5    0.29    0.45 
   0   7  -5    0.35    0.47 
   0   7  -5    0.39    0.45 
   0   7   5    0.39    0.43 
   0  -7  -6   11.51    1.09 
   0  -7   6   10.14    0.95 
  -1   0  24    7.50    0.88 
   1   0 -24    6.18    0.76 
   1   0 -24    7.10    0.74 
   1   0 -24    6.18    0.75 
  -1   0  23    0.07    0.44 
   1   0 -23    0.04    0.39 
   1   0 -23    0.30    0.38 
   1   0 -23    0.21    0.42 
  -1   0  22   11.99    0.86 
   1   0 -22   11.54    0.78 
   1   0 -22   12.06    0.79 
   1   0 -22   11.25    0.86 
  -1   0  21   -0.04    0.39 
   1   0 -21    0.22    0.36 
   1   0 -21    0.24    0.34 
   1   0 -21   -0.23    0.37 
  -1   0  20    0.54    0.40 
   1   0 -20    0.38    0.37 
   1   0 -20    0.46    0.33 
   1   0 -20    0.28    0.37 
  -1   0  19    0.16    0.36 
   1   0 -19   -0.05    0.27 
   1   0 -19   -0.09    0.29 
   1   0 -19   -0.04    0.34 
  -1   0  18    7.81    0.55 
  -1   0  18    7.78    0.64 
   1   0 -18    7.07    0.60 
   1   0 -18    7.41    0.57 
   1   0 -18    7.00    0.65 
  -1   0  17    0.02    0.25 
  -1   0  17    0.09    0.31 
   1   0 -17   -0.04    0.26 
   1   0 -17    0.06    0.32 
  -1   0  16    2.17    0.33 
  -1   0  16    1.90    0.36 
   1   0 -16    2.14    0.36 
   1   0 -16    2.46    0.43 
  -1   0  15    0.04    0.23 
  -1   0  15    0.16    0.28 
   1   0 -15    0.27    0.37 
  -1   0  14    7.08    0.46 
  -1   0  14    7.41    0.51 
  -1   0  13    0.09    0.20 
  -1   0  13    0.08    0.22 
  -1   0  12    9.22    0.43 
  -1   0  11    0.11    0.18 
  -1   0  10   64.35    0.85 
  -1   0   9   -0.13    0.17 
  -1   0   8  345.73    1.69 
  -1   0   7    0.03    0.16 
  -1   0   6   11.14    0.35 
  -1   0   5    0.07    0.15 
  -1   0   4   31.31    0.43 
  -1   0   3   -0.04    0.12 
  -1   0   2    1.15    0.14 
   1   0  -2    0.88    0.10 
  -1   0   1   -0.11    0.06 
  -1   0   0    5.34    0.11 
   1   0   4  997.78    4.79 
   1   0   5   -0.08    0.13 
  -1   0  -6   80.46    0.66 
   1   0   6   81.47    0.69 
   1   0   7   -0.09    0.14 
   1   0   8    7.93    0.33 
   1   0   9    0.09    0.16 
   1   0  10   12.49    0.42 
   1   0  10   11.92    0.53 
   1   0  11    0.11    0.18 
   1   0  12  149.15    1.31 
  -1   0 -14   78.18    1.39 
   1   0  14   81.67    1.08 
   1   0  14   80.82    1.26 
  -1   0 -15    0.68    0.32 
   1   0  15    0.73    0.29 
  -1   0 -16   15.37    0.72 
  -1   0 -16   17.03    0.68 
  -1   0 -16   16.90    0.80 
   1   0  16   16.59    0.61 
   1   0  16   16.48    0.72 
   1   0  16   16.16    0.72 
  -1   0 -17   -0.03    0.29 
  -1   0 -17    0.25    0.28 
  -1   0 -17    0.25    0.33 
   1   0  17    0.16    0.31 
   1   0  17    0.28    0.31 
  -1   0 -18   40.10    1.18 
  -1   0 -18   40.19    1.04 
  -1   0 -18   38.16    1.18 
   1   0  18   41.43    1.12 
   1   0  18   39.93    1.05 
  -1   0 -19    0.48    0.32 
  -1   0 -19    0.30    0.30 
  -1   0 -19    0.31    0.37 
   1   0  19    0.77    0.38 
   1   0  19    0.37    0.37 
  -1   0 -20    3.65    0.55 
  -1   0 -20    4.62    0.53 
  -1   0 -20    4.62    0.63 
   1   0  20    4.86    0.58 
  -1   0 -21   -0.03    0.36 
  -1   0 -21    0.12    0.41 
   1   0  21   -0.11    0.38 
  -1   0 -22    1.82    0.50 
  -1   0 -22    2.24    0.55 
   1   0  22    2.73    0.54 
  -1   0 -23    0.39    0.44 
  -1   0 -23   -0.07    0.43 
   1   0  23   -0.05    0.64 
  -1  -1  23    2.74    0.59 
  -1   1  23    1.73    0.50 
   1  -1 -23    2.45    0.52 
   1  -1 -23    1.66    0.50 
   1   1 -23    1.56    0.48 
   1   1 -23    2.55    0.59 
  -1  -1  22   31.17    1.21 
  -1   1  22   29.59    1.12 
   1  -1 -22   30.08    1.13 
   1  -1 -22   30.50    1.19 
   1   1 -22   28.73    1.14 
   1   1 -22   30.74    1.24 
  -1  -1  21    5.75    0.66 
  -1   1  21    6.78    0.71 
   1  -1 -21    5.07    0.59 
   1  -1 -21    5.99    0.70 
   1  -1 -21    6.38    0.60 
   1   1 -21    6.22    0.61 
   1   1 -21    6.30    0.74 
  -1  -1  20    1.39    0.40 
  -1  -1  20    1.11    0.41 
  -1   1  20    1.48    0.42 
  -1   1  20    1.11    0.41 
   1  -1 -20    1.70    0.42 
   1  -1 -20    1.13    0.41 
   1  -1 -20    2.08    0.40 
   1   1 -20    1.51    0.41 
   1   1 -20    0.87    0.44 
  -1  -1  19   14.85    0.78 
  -1  -1  19   16.37    0.88 
  -1   1  19   15.03    0.79 
  -1   1  19   16.51    0.80 
   1  -1 -19   16.29    0.81 
   1  -1 -19   15.67    0.82 
   1   1 -19   15.05    0.79 
   1   1 -19   15.73    0.74 
   1   1 -19   15.21    0.84 
  -1  -1  18   -0.07    0.29 
  -1  -1  18    0.28    0.36 
  -1   1  18    0.17    0.31 
  -1   1  18   -0.15    0.30 
   1  -1 -18    0.01    0.32 
   1  -1 -18   -0.02    0.32 
   1   1 -18   -0.08    0.26 
   1   1 -18   -0.03    0.25 
   1   1 -18   -0.05    0.32 
  -1  -1  17    0.78    0.32 
  -1  -1  17    1.10    0.40 
  -1   1  17    0.71    0.32 
  -1   1  17    0.75    0.32 
   1  -1 -17    0.64    0.28 
   1  -1 -17    0.58    0.33 
   1  -1 -17    0.22    0.31 
   1   1 -17    0.43    0.31 
   1   1 -17    0.87    0.29 
   1   1 -17    1.04    0.38 
  -1  -1  16    2.60    0.39 
  -1  -1  16    2.67    0.47 
  -1  -1  16    2.40    0.42 
  -1   1  16    2.55    0.31 
  -1   1  16    2.70    0.41 
   1  -1 -16    2.82    0.36 
   1  -1 -16    2.89    0.42 
   1  -1 -16    2.82    0.40 
   1   1 -16    2.23    0.42 
  -1  -1  15   80.06    1.29 
  -1  -1  15   79.42    1.41 
  -1  -1  15   82.11    1.41 
  -1   1  15   82.22    1.06 
  -1   1  15   81.01    1.30 
   1  -1 -15   82.07    1.21 
   1  -1 -15   80.08    1.36 
   1   1 -15   78.41    1.40 
  -1  -1  14    2.64    0.36 
  -1  -1  14    2.49    0.41 
  -1  -1  14    2.81    0.41 
  -1   1  14    2.24    0.28 
  -1   1  14    2.36    0.35 
   1  -1 -14    2.51    0.32 
   1  -1 -14    2.02    0.37 
  -1  -1  13    0.99    0.29 
  -1  -1  13    1.11    0.32 
  -1  -1  13    0.98    0.31 
  -1   1  13    0.80    0.21 
  -1   1  13    0.96    0.32 
   1   1 -13    0.68    0.27 
  -1  -1  12    0.20    0.23 
  -1  -1  12    0.31    0.28 
  -1  -1  12    0.29    0.26 
  -1   1  12    0.25    0.18 
   1   1 -12    0.32    0.24 
  -1  -1  11  143.47    1.45 
  -1  -1  11  151.32    1.60 
  -1   1  11  147.29    1.18 
  -1  -1  10    1.41    0.26 
  -1  -1  10    1.52    0.34 
  -1   1  10    1.82    0.21 
  -1  -1   9   34.48    0.70 
  -1   1   9   34.47    0.55 
  -1  -1   8    3.51    0.34 
  -1   1   8    3.79    0.26 
  -1  -1   7    5.94    0.37 
  -1   1   7    6.12    0.29 
  -1  -1   6   32.72    0.60 
  -1   1   6   32.34    0.46 
  -1  -1   5    2.47    0.30 
  -1   1   5    2.04    0.22 
  -1  -1   4  181.49    1.15 
  -1   1   4  180.79    1.12 
  -1  -1   3    0.69    0.18 
  -1  -1   2  249.74    1.58 
  -1  -1   1  718.85    4.12 
  -1   1  -1  412.14    2.71 
  -1   1  -2    0.22    0.16 
  -1  -1  -3  610.73    2.10 
  -1   1  -3  617.00    3.73 
  -1  -1  -4  457.30    1.53 
  -1  -1  -5  102.89    0.45 
  -1   1  -5  100.40    0.94 
   1  -1   5  103.03    0.85 
   1   1   5   98.72    0.44 
  -1  -1  -6    9.78    0.21 
  -1   1  -6    9.32    0.40 
   1  -1   6    9.05    0.40 
   1  -1   6   10.03    0.35 
   1   1   6    9.40    0.20 
  -1   1  -7   30.38    0.60 
   1  -1   7   30.35    0.62 
   1  -1   7   31.84    0.56 
   1   1   7   30.61    0.35 
  -1   1  -8  748.67    4.99 
   1  -1   8  762.60    4.90 
   1   1   8  775.81    3.65 
   1  -1   9   29.51    0.66 
   1  -1   9   31.15    0.89 
   1   1   9   29.38    0.43 
   1  -1  10   31.94    0.71 
   1  -1  10   33.36    0.82 
   1   1  10   33.00    0.48 
   1  -1  11    2.49    0.31 
   1  -1  11    2.57    0.37 
   1   1  11    2.37    0.24 
  -1   1 -12   20.59    0.68 
   1  -1  12   19.74    0.64 
   1  -1  12   20.66    0.76 
   1  -1  12   19.61    0.69 
   1   1  12   19.69    0.45 
  -1   1 -13   16.15    0.65 
   1  -1  13   15.97    0.62 
   1  -1  13   15.84    0.69 
   1  -1  13   16.64    0.68 
   1   1  13   16.00    0.44 
  -1  -1 -14    0.10    0.25 
  -1  -1 -14    0.05    0.26 
  -1   1 -14   -0.02    0.25 
  -1   1 -14    0.04    0.26 
   1  -1  14   -0.05    0.25 
   1  -1  14   -0.15    0.31 
   1  -1  14    0.15    0.29 
   1   1  14    0.11    0.25 
   1   1  14   -0.01    0.30 
  -1  -1 -15    1.41    0.34 
  -1  -1 -15    0.86    0.33 
  -1   1 -15    0.85    0.35 
   1  -1  15    1.09    0.32 
   1  -1  15    1.02    0.39 
   1  -1  15    0.95    0.34 
   1   1  15    0.96    0.31 
   1   1  15    1.01    0.33 
  -1  -1 -16    8.96    0.60 
  -1  -1 -16    8.56    0.64 
  -1   1 -16    8.67    0.61 
  -1   1 -16    8.54    0.66 
   1  -1  16    9.21    0.59 
   1  -1  16    8.29    0.70 
   1  -1  16    9.92    0.70 
   1   1  16    9.44    0.60 
   1   1  16    9.12    0.63 
  -1  -1 -17    0.19    0.30 
  -1  -1 -17    0.06    0.30 
  -1   1 -17    0.13    0.30 
  -1   1 -17    0.02    0.32 
   1  -1  17   -0.05    0.29 
   1  -1  17   -0.13    0.32 
   1  -1  17    0.37    0.35 
   1   1  17    0.18    0.31 
   1   1  17    0.37    0.34 
  -1  -1 -18    1.60    0.39 
  -1  -1 -18    1.66    0.42 
  -1   1 -18    2.26    0.45 
  -1   1 -18    1.74    0.44 
   1  -1  18    1.59    0.37 
   1  -1  18    1.53    0.45 
   1   1  18    1.80    0.40 
   1   1  18    1.81    0.43 
  -1  -1 -19    1.19    0.38 
  -1  -1 -19    0.90    0.39 
  -1   1 -19    0.78    0.38 
  -1   1 -19    0.56    0.39 
   1  -1  19    1.26    0.44 
   1   1  19    1.04    0.39 
   1   1  19    0.92    0.42 
  -1  -1 -20    0.14    0.35 
  -1  -1 -20    0.46    0.41 
  -1   1 -20    0.79    0.40 
  -1   1 -20    0.44    0.41 
   1  -1  20    0.59    0.43 
   1   1  20    0.70    0.42 
  -1  -1 -21    7.41    0.71 
  -1  -1 -21    8.69    0.72 
  -1  -1 -21    7.47    0.78 
  -1   1 -21    7.99    0.75 
  -1   1 -21    8.29    0.82 
   1  -1  21    9.08    0.80 
   1   1  21    9.23    0.81 
  -1  -1 -22    0.68    0.44 
  -1  -1 -22    0.24    0.40 
  -1  -1 -22    0.10    0.41 
  -1   1 -22    0.20    0.41 
  -1   1 -22    0.41    0.45 
   1  -1  22    0.76    0.47 
   1   1  22    0.09    0.42 
  -1  -1 -23   19.67    1.02 
  -1  -1 -23   19.32    1.11 
  -1   1 -23   19.33    1.12 
   1  -1  23   19.69    1.11 
  -1  -2  23   13.22    1.04 
  -1   2  23   12.88    0.95 
   1  -2 -23   12.73    0.91 
   1  -2 -23   12.13    0.89 
   1  -2 -23   12.30    0.85 
   1   2 -23   13.29    0.90 
   1   2 -23   12.76    1.02 
  -1  -2  22    5.27    0.64 
  -1  -2  22    6.55    0.79 
  -1   2  22    5.61    0.67 
   1  -2 -22    5.50    0.68 
   1  -2 -22    5.09    0.64 
   1  -2 -22    5.29    0.66 
   1   2 -22    5.63    0.68 
   1   2 -22    5.55    0.73 
  -1  -2  21    0.43    0.42 
  -1  -2  21    0.09    0.46 
  -1   2  21   -0.02    0.36 
  -1   2  21    0.57    0.44 
   1  -2 -21    0.40    0.39 
   1  -2 -21    0.47    0.41 
   1  -2 -21    1.03    0.40 
   1   2 -21    0.46    0.40 
   1   2 -21    0.28    0.44 
  -1  -2  20    0.03    0.38 
  -1  -2  20   -0.22    0.42 
  -1  -2  20   -0.36    0.40 
  -1   2  20    0.04    0.33 
  -1   2  20    0.13    0.36 
   1  -2 -20    0.07    0.34 
   1  -2 -20    0.07    0.37 
   1  -2 -20    0.07    0.36 
   1  -2 -20    0.01    0.33 
   1   2 -20    0.15    0.35 
   1   2 -20   -0.41    0.37 
   1   2 -20   -0.10    0.33 
  -1  -2  19    0.38    0.38 
  -1  -2  19    0.24    0.43 
  -1  -2  19    0.30    0.42 
  -1   2  19    0.27    0.33 
  -1   2  19    0.27    0.37 
   1  -2 -19    0.40    0.35 
   1  -2 -19    0.27    0.37 
   1  -2 -19    0.35    0.35 
   1  -2 -19    0.64    0.37 
   1   2 -19    0.28    0.35 
   1   2 -19    0.75    0.43 
   1   2 -19    0.35    0.35 
  -1  -2  18   19.61    0.90 
  -1  -2  18   20.16    0.99 
  -1  -2  18   18.50    0.93 
  -1   2  18   18.75    0.81 
  -1   2  18   18.73    0.84 
   1  -2 -18   19.31    0.84 
   1  -2 -18   18.04    0.86 
   1  -2 -18   18.41    0.82 
   1  -2 -18   19.12    0.83 
   1   2 -18   18.03    0.83 
   1   2 -18   18.12    0.91 
   1   2 -18   18.80    0.84 
  -1  -2  17    0.83    0.38 
  -1  -2  17    0.35    0.40 
  -1  -2  17    0.31    0.38 
  -1   2  17   -0.11    0.29 
  -1   2  17    0.37    0.33 
   1  -2 -17    0.36    0.32 
   1  -2 -17    0.56    0.35 
   1  -2 -17    0.15    0.29 
   1  -2 -17    0.00    0.30 
   1   2 -17    0.05    0.30 
   1   2 -17    0.28    0.34 
   1   2 -17    0.00    0.35 
   1   2 -17    0.11    0.30 
  -1  -2  16   37.84    1.06 
  -1  -2  16   37.70    1.11 
  -1  -2  16   37.59    1.13 
  -1   2  16   38.39    0.97 
  -1   2  16   37.46    1.04 
   1  -2 -16   38.57    1.03 
   1  -2 -16   36.67    1.05 
   1  -2 -16   37.42    1.02 
   1   2 -16   39.12    1.12 
   1   2 -16   36.51    1.09 
  -1  -2  15    1.18    0.36 
  -1  -2  15    0.86    0.40 
  -1  -2  15    0.74    0.37 
  -1   2  15    0.64    0.30 
  -1   2  15    0.91    0.34 
   1  -2 -15    0.64    0.34 
   1   2 -15    0.89    0.36 
   1   2 -15    0.65    0.35 
  -1  -2  14   87.75    1.44 
  -1  -2  14   85.37    1.48 
  -1  -2  14   86.19    1.48 
  -1   2  14   83.44    1.26 
  -1   2  14   87.74    1.31 
  -1   2  14   86.81    1.39 
   1  -2 -14   87.57    1.47 
   1   2 -14   87.10    1.48 
   1   2 -14   84.26    1.45 
  -1  -2  13    1.24    0.36 
  -1  -2  13    0.73    0.33 
  -1  -2  13    1.07    0.35 
  -1   2  13    1.36    0.21 
  -1   2  13    1.09    0.28 
   1  -2 -13    0.92    0.31 
   1   2 -13    1.25    0.34 
  -1  -2  12    0.38    0.29 
  -1  -2  12    0.83    0.33 
  -1  -2  12    0.36    0.30 
  -1   2  12    0.43    0.17 
   1  -2 -12    0.45    0.26 
   1   2 -12    0.44    0.29 
  -1  -2  11    5.34    0.49 
  -1  -2  11    6.26    0.52 
  -1  -2  11    5.63    0.51 
  -1   2  11    5.25    0.30 
   1   2 -11    5.75    0.50 
  -1  -2  10    0.77    0.26 
  -1  -2  10    1.05    0.18 
  -1  -2  10    1.04    0.30 
  -1  -2  10    0.60    0.25 
  -1   2  10    0.83    0.18 
   1   2 -10    0.67    0.25 
  -1  -2   9   17.81    0.62 
  -1  -2   9   19.38    0.41 
  -1  -2   9   19.88    0.65 
  -1  -2   8    2.50    0.32 
  -1  -2   8    2.29    0.26 
  -1  -2   7    0.97    0.24 
  -1  -2   6  285.43    1.92 
  -1   2   6  273.29    1.21 
  -1  -2   5    8.63    0.44 
  -1   2   5    9.09    0.28 
  -1   2   4   94.96    0.77 
  -1  -2   3    5.16    0.37 
  -1  -2   3    5.93    0.33 
  -1   2   3    5.41    0.28 
  -1   2   2  119.84    0.94 
  -1   2   1   20.99    0.46 
  -1   2   0  120.94    1.03 
   1  -2   0  129.76    1.09 
   1   2   0  126.71    0.98 
   1  -2   1    6.52    0.34 
  -1   2  -2  206.74    1.45 
   1  -2   2  215.11    1.35 
  -1   2  -3   48.78    0.77 
   1  -2   3   52.08    0.70 
  -1   2  -4    0.14    0.19 
   1  -2   4    0.09    0.17 
  -1   2  -5   27.17    0.63 
   1  -2   5   29.18    0.56 
  -1   2  -6   42.98    0.81 
   1  -2   6   45.16    0.68 
  -1   2  -7   15.23    0.56 
   1  -2   7   15.90    0.46 
   1  -2   7   16.68    0.72 
  -1   2  -8   41.49    0.85 
   1  -2   8   41.01    0.87 
   1  -2   8   42.93    0.71 
   1  -2   8   43.89    0.88 
  -1   2  -9   22.67    0.68 
  -1   2  -9   22.90    0.70 
   1  -2   9   23.65    0.72 
   1  -2   9   23.80    0.58 
   1  -2   9   25.41    0.76 
  -1   2 -10   47.36    0.98 
   1  -2  10   45.09    0.95 
   1  -2  10   46.99    0.79 
   1  -2  10   47.56    1.02 
  -1   2 -11    1.86    0.33 
   1  -2  11    1.81    0.34 
   1  -2  11    2.30    0.29 
   1  -2  11    2.32    0.38 
   1  -2  11    1.91    0.34 
  -1  -2 -12    2.22    0.37 
  -1   2 -12    2.63    0.38 
   1  -2  12    2.38    0.38 
   1  -2  12    2.17    0.40 
   1  -2  12    2.60    0.39 
   1   2  12    1.92    0.36 
  -1  -2 -13    0.14    0.28 
  -1   2 -13    0.24    0.30 
  -1   2 -13    0.12    0.28 
   1  -2  13   -0.24    0.29 
   1  -2  13    0.16    0.33 
   1  -2  13   -0.03    0.32 
   1   2  13   -0.22    0.29 
  -1  -2 -14  128.66    1.80 
  -1  -2 -14  127.62    1.74 
  -1   2 -14  124.74    1.76 
  -1   2 -14  124.50    1.79 
   1  -2  14  125.98    1.72 
   1  -2  14  126.42    1.84 
   1  -2  14  128.50    1.80 
   1   2  14  129.59    1.50 
   1   2  14  126.39    1.76 
  -1  -2 -15    6.61    0.58 
  -1  -2 -15    6.44    0.57 
  -1   2 -15    6.07    0.52 
  -1   2 -15    5.98    0.63 
  -1   2 -15    6.02    0.60 
   1  -2  15    6.21    0.63 
   1  -2  15    6.40    0.63 
   1  -2  15    6.69    0.64 
   1   2  15    6.32    0.61 
   1   2  15    7.17    0.63 
  -1  -2 -16    5.13    0.57 
  -1  -2 -16    5.56    0.56 
  -1   2 -16    4.95    0.55 
  -1   2 -16    5.03    0.59 
  -1   2 -16    5.61    0.62 
  -1   2 -16    4.81    0.55 
   1  -2  16    5.34    0.63 
   1  -2  16    5.12    0.62 
   1  -2  16    4.89    0.56 
   1   2  16    5.77    0.62 
  -1  -2 -17    1.53    0.43 
  -1  -2 -17    1.36    0.38 
  -1   2 -17    1.65    0.41 
  -1   2 -17    1.68    0.42 
  -1   2 -17    1.57    0.44 
  -1   2 -17    1.92    0.41 
   1  -2  17    1.67    0.41 
   1  -2  17    1.42    0.43 
   1  -2  17    1.44    0.45 
   1   2  17    1.78    0.43 
  -1  -2 -18   -0.09    0.33 
  -1  -2 -18   -0.14    0.32 
  -1  -2 -18    0.02    0.31 
  -1   2 -18   -0.27    0.28 
  -1   2 -18   -0.04    0.35 
  -1   2 -18    0.00    0.35 
  -1   2 -18    0.08    0.31 
   1  -2  18   -0.16    0.35 
   1  -2  18   -0.41    0.42 
   1  -2  18    0.16    0.38 
   1   2  18   -0.08    0.36 
  -1  -2 -19    0.33    0.37 
  -1  -2 -19    0.27    0.36 
  -1  -2 -19    0.30    0.36 
  -1   2 -19   -0.05    0.36 
  -1   2 -19    0.20    0.36 
  -1   2 -19    0.17    0.34 
   1  -2  19    0.10    0.36 
   1  -2  19    0.51    0.48 
   1  -2  19    0.27    0.42 
   1   2  19    0.30    0.40 
  -1  -2 -20    0.06    0.36 
  -1  -2 -20    0.03    0.36 
  -1  -2 -20   -0.21    0.33 
  -1   2 -20    0.26    0.35 
  -1   2 -20    0.02    0.41 
   1  -2  20    0.29    0.38 
   1  -2  20   -0.07    0.47 
   1  -2  20    0.03    0.44 
   1   2  20    0.01    0.41 
  -1  -2 -21    0.16    0.39 
  -1  -2 -21    0.01    0.38 
  -1  -2 -21   -0.19    0.36 
  -1   2 -21    0.27    0.40 
  -1   2 -21    0.63    0.44 
   1  -2  21    0.10    0.50 
   1  -2  21    0.36    0.48 
   1   2  21   -0.23    0.43 
  -1  -2 -22   30.80    1.23 
  -1  -2 -22   31.79    1.29 
  -1  -2 -22   32.76    1.18 
  -1   2 -22   32.29    1.28 
  -1   2 -22   32.56    1.35 
   1  -2  22   34.12    1.34 
   1   2  22   33.57    1.31 
  -1  -3  22   48.92    1.52 
  -1  -3  22   49.97    1.65 
  -1  -3  22   51.29    1.65 
  -1   3  22   49.42    1.52 
   1  -3 -22   49.00    1.49 
   1  -3 -22   47.85    1.56 
   1  -3 -22   47.45    1.43 
   1  -3 -22   46.51    1.45 
   1   3 -22   47.92    1.60 
   1   3 -22   48.11    1.44 
  -1  -3  21    4.54    0.65 
  -1  -3  21    4.54    0.72 
  -1  -3  21    5.93    0.77 
  -1   3  21    4.94    0.68 
   1  -3 -21    4.43    0.63 
   1  -3 -21    4.92    0.67 
   1  -3 -21    4.98    0.61 
   1  -3 -21    4.83    0.63 
   1   3 -21    5.39    0.67 
   1   3 -21    4.46    0.68 
   1   3 -21    5.05    0.63 
  -1  -3  20    0.48    0.45 
  -1  -3  20    0.66    0.51 
  -1  -3  20    1.48    0.56 
  -1   3  20    0.61    0.46 
   1  -3 -20    1.00    0.46 
   1  -3 -20    1.21    0.49 
   1  -3 -20    0.86    0.39 
   1  -3 -20    1.84    0.48 
   1   3 -20    0.90    0.41 
   1   3 -20    0.71    0.47 
   1   3 -20    1.05    0.49 
   1   3 -20    1.03    0.44 
  -1  -3  19   20.10    1.03 
  -1  -3  19   21.99    1.13 
  -1  -3  19   21.36    1.10 
  -1   3  19   21.44    1.05 
   1  -3 -19   22.57    1.01 
   1  -3 -19   19.27    0.95 
   1  -3 -19   21.43    0.92 
   1  -3 -19   20.31    0.95 
   1   3 -19   19.32    0.95 
   1   3 -19   20.29    1.05 
   1   3 -19   20.20    1.04 
   1   3 -19   20.85    1.00 
  -1  -3  18    9.85    0.83 
  -1  -3  18   11.80    0.91 
  -1  -3  18   11.06    0.88 
  -1   3  18   11.24    1.11 
  -1   3  18   10.56    0.79 
   1  -3 -18   10.58    0.78 
   1  -3 -18   11.07    0.80 
   1  -3 -18   11.02    0.72 
   1  -3 -18   10.71    0.74 
   1   3 -18    9.71    0.70 
   1   3 -18   10.95    0.84 
   1   3 -18    9.78    0.81 
   1   3 -18   10.84    0.80 
  -1  -3  17    3.06    0.52 
  -1  -3  17    1.86    0.52 
  -1  -3  17    3.25    0.56 
  -1   3  17    1.81    0.39 
  -1   3  17    2.61    0.49 
   1  -3 -17    2.33    0.47 
   1  -3 -17    2.31    0.48 
   1  -3 -17    2.48    0.42 
   1  -3 -17    2.02    0.47 
   1   3 -17    2.82    0.45 
   1   3 -17    2.29    0.49 
   1   3 -17    2.21    0.48 
   1   3 -17    2.48    0.46 
  -1  -3  16   13.07    0.83 
  -1  -3  16   13.55    0.86 
  -1  -3  16   13.18    0.87 
  -1   3  16   13.38    0.69 
  -1   3  16   12.72    0.79 
   1  -3 -16   13.06    0.79 
   1  -3 -16   13.37    0.69 
   1  -3 -16   13.70    0.76 
   1   3 -16   12.12    0.70 
   1   3 -16   13.13    0.84 
   1   3 -16   12.60    0.81 
   1   3 -16   12.96    0.78 
  -1  -3  15   10.79    0.77 
  -1  -3  15   10.78    0.79 
  -1  -3  15    9.51    0.71 
  -1   3  15    9.64    0.60 
  -1   3  15   10.19    0.73 
   1  -3 -15   10.00    0.71 
   1  -3 -15   10.16    0.62 
   1   3 -15    9.57    0.61 
   1   3 -15    9.50    0.68 
   1   3 -15   10.06    0.72 
   1   3 -15    9.58    0.70 
  -1  -3  14   63.45    1.38 
  -1  -3  14   66.26    1.42 
  -1  -3  14   63.69    1.41 
  -1   3  14   63.37    1.19 
  -1   3  14   61.90    1.34 
   1  -3 -14   61.59    1.36 
   1   3 -14   62.75    1.39 
   1   3 -14   62.89    1.36 
   1   3 -14   63.52    1.36 
  -1  -3  13    0.56    0.36 
  -1  -3  13    0.69    0.38 
  -1  -3  13    1.13    0.40 
  -1   3  13    0.98    0.30 
  -1   3  13    1.05    0.37 
   1  -3 -13    0.65    0.34 
   1   3 -13    1.06    0.39 
   1   3 -13    1.17    0.37 
   1   3 -13    0.80    0.36 
  -1  -3  12   27.53    0.95 
  -1  -3  12   29.21    0.94 
  -1  -3  12   27.90    0.94 
  -1   3  12   28.66    0.79 
  -1   3  12   28.11    0.92 
   1  -3 -12   27.14    0.89 
   1   3 -12   28.56    0.94 
   1   3 -12   28.06    0.90 
  -1  -3  11    6.28    0.57 
  -1  -3  11    6.60    0.58 
  -1   3  11    5.51    0.45 
  -1   3  11    5.51    0.50 
   1  -3 -11    6.46    0.50 
   1   3 -11    5.52    0.56 
  -1  -3  10   -0.11    0.26 
  -1  -3  10    0.03    0.18 
  -1  -3  10   -0.29    0.27 
  -1   3  10    0.02    0.24 
   1  -3 -10    0.00    0.25 
   1   3 -10    0.01    0.25 
  -1  -3   9   17.42    0.71 
  -1  -3   9   18.68    0.48 
  -1  -3   9   18.87    0.70 
   1   3  -9   16.82    0.69 
  -1  -3   8    0.95    0.30 
  -1  -3   8    0.80    0.20 
  -1  -3   8    0.70    0.29 
  -1   3   8    0.75    0.16 
   1   3  -8    0.78    0.30 
  -1  -3   7    0.31    0.27 
  -1  -3   7    0.39    0.18 
  -1  -3   7    0.34    0.25 
  -1   3   7    0.38    0.16 
   1   3  -7    0.01    0.22 
  -1  -3   6   13.88    0.60 
  -1  -3   6   14.72    0.44 
  -1  -3   6   14.21    0.56 
  -1   3   6   14.58    0.41 
   1   3  -6   14.30    0.71 
  -1  -3   5   68.79    1.10 
  -1  -3   5   70.72    0.87 
  -1   3   5   66.82    0.80 
  -1  -3   4   28.12    0.72 
  -1  -3   4   29.17    0.60 
  -1   3   4   27.55    0.57 
  -1  -3   3    1.80    0.24 
  -1   3   3    1.27    0.22 
  -1   3   2    0.16    0.18 
  -1   3   1    0.99    0.22 
  -1   3   0    0.82    0.23 
   1  -3   0    1.19    0.26 
  -1   3  -1   33.97    0.74 
   1  -3   1   35.99    0.73 
  -1   3  -2   19.66    0.61 
   1  -3   2   20.29    0.57 
  -1   3  -3    1.40    0.29 
   1  -3   3    0.95    0.23 
  -1   3  -4  114.49    1.38 
   1  -3   4  122.59    1.24 
  -1   3  -5   10.36    0.55 
  -1   3  -5   10.04    0.54 
   1  -3   5    9.74    0.44 
  -1   3  -6    0.25    0.23 
  -1   3  -6    0.10    0.23 
   1  -3   6    0.29    0.20 
   1  -3   6    0.02    0.25 
  -1   3  -7   -0.03    0.26 
  -1   3  -7   -0.07    0.25 
   1  -3   7    0.06    0.19 
   1  -3   7   -0.03    0.27 
  -1   3  -8   10.15    0.59 
  -1   3  -8   10.22    0.59 
   1  -3   8   11.13    0.61 
   1  -3   8   11.34    0.48 
   1  -3   8   10.78    0.58 
  -1   3  -9    0.31    0.29 
  -1   3  -9    0.17    0.25 
   1  -3   9    0.17    0.29 
   1  -3   9    0.08    0.22 
   1  -3   9    0.38    0.32 
   1   3   9    0.28    0.29 
  -1   3 -10   26.30    0.87 
   1  -3  10   26.73    0.89 
   1  -3  10   27.98    0.70 
   1  -3  10   27.52    0.91 
   1   3  10   26.17    0.87 
  -1  -3 -11    8.34    0.61 
  -1   3 -11    8.96    0.64 
   1  -3  11    8.20    0.64 
   1  -3  11    9.14    0.50 
   1  -3  11    8.14    0.67 
   1   3  11    8.90    0.63 
  -1  -3 -12   67.58    1.35 
  -1   3 -12   68.64    1.38 
  -1   3 -12   66.84    1.30 
  -1   3 -12   68.46    1.42 
   1  -3  12   69.88    1.39 
   1  -3  12   73.20    1.10 
   1  -3  12   72.10    1.44 
   1   3  12   70.05    1.39 
  -1  -3 -13    0.53    0.35 
  -1  -3 -13    0.68    0.31 
  -1   3 -13    0.63    0.50 
  -1   3 -13    0.78    0.38 
  -1   3 -13    0.92    0.36 
  -1   3 -13    0.57    0.36 
   1  -3  13    0.76    0.39 
   1  -3  13    1.22    0.43 
   1  -3  13    0.82    0.39 
   1   3  13    0.81    0.38 
  -1  -3 -14    0.46    0.35 
  -1  -3 -14    0.41    0.32 
  -1   3 -14    0.37    0.32 
  -1   3 -14    0.67    0.36 
  -1   3 -14    0.42    0.34 
  -1   3 -14    0.09    0.35 
   1  -3  14    0.36    0.38 
   1  -3  14    1.11    0.44 
   1  -3  14    0.16    0.35 
   1   3  14    0.76    0.38 
  -1  -3 -15    1.88    0.40 
  -1  -3 -15    1.81    0.40 
  -1   3 -15    1.58    0.36 
  -1   3 -15    2.12    0.45 
  -1   3 -15    1.95    0.44 
  -1   3 -15    1.91    0.45 
   1  -3  15    1.56    0.45 
   1  -3  15    1.71    0.49 
   1  -3  15    1.91    0.46 
   1   3  15    1.50    0.42 
  -1  -3 -16    0.38    0.34 
  -1  -3 -16    0.25    0.32 
  -1   3 -16    0.60    0.35 
  -1   3 -16    0.03    0.36 
  -1   3 -16   -0.25    0.36 
  -1   3 -16   -0.10    0.35 
   1  -3  16    0.17    0.39 
   1  -3  16    0.14    0.41 
   1  -3  16   -0.03    0.39 
   1   3  16    0.33    0.38 
  -1  -3 -17    1.43    0.41 
  -1  -3 -17    1.17    0.39 
  -1   3 -17    1.81    0.40 
  -1   3 -17    1.27    0.46 
  -1   3 -17    1.05    0.44 
  -1   3 -17    1.24    0.42 
   1  -3  17    1.57    0.47 
   1  -3  17    1.60    0.51 
   1  -3  17    1.09    0.47 
   1   3  17    1.49    0.47 
  -1  -3 -18    1.54    0.45 
  -1  -3 -18    1.84    0.44 
  -1   3 -18    1.95    0.47 
  -1   3 -18    1.77    0.49 
  -1   3 -18    1.34    0.46 
  -1   3 -18    2.42    0.50 
   1  -3  18    1.79    0.51 
   1  -3  18    1.32    0.56 
   1  -3  18    1.41    0.52 
   1   3  18    1.37    0.49 
  -1  -3 -19    0.04    0.36 
  -1  -3 -19    0.01    0.35 
  -1  -3 -19    0.07    0.37 
  -1   3 -19    0.05    0.37 
  -1   3 -19    0.36    0.43 
  -1   3 -19    0.43    0.44 
  -1   3 -19   -0.24    0.36 
   1  -3  19   -0.04    0.43 
   1  -3  19    0.53    0.49 
   1  -3  19    0.16    0.47 
   1   3  19   -0.07    0.42 
  -1  -3 -20    1.30    0.48 
  -1  -3 -20    1.58    0.47 
  -1  -3 -20    1.78    0.48 
  -1   3 -20    1.49    0.48 
  -1   3 -20    1.59    0.51 
  -1   3 -20    0.94    0.50 
  -1   3 -20    1.77    0.49 
   1  -3  20    1.42    0.51 
   1  -3  20    1.99    0.62 
   1  -3  20    1.51    0.56 
   1   3  20    2.06    0.55 
  -1  -3 -21    5.75    0.70 
  -1  -3 -21    4.64    0.68 
  -1  -3 -21    3.82    0.59 
  -1  -3 -21    4.06    0.62 
  -1   3 -21    4.48    0.66 
  -1   3 -21    4.91    0.70 
  -1   3 -21    3.72    0.66 
  -1   3 -21    3.92    0.59 
   1  -3  21    5.35    0.70 
   1  -3  21    3.85    0.70 
   1  -3  21    3.61    0.69 
   1   3  21    3.75    0.65 
  -1  -4  20    0.24    0.49 
  -1  -4  20    0.28    0.51 
  -1  -4  20    0.68    0.55 
   1  -4 -20    0.17    0.45 
   1  -4 -20    0.47    0.50 
   1  -4 -20    0.24    0.43 
   1   4 -20    0.25    0.41 
   1   4 -20    0.65    0.51 
   1   4 -20    0.31    0.46 
   1   4 -20    0.08    0.44 
  -1  -4  19    0.13    0.46 
  -1  -4  19    0.02    0.50 
  -1  -4  19    0.34    0.52 
   1  -4 -19    0.66    0.45 
   1  -4 -19    0.17    0.44 
   1  -4 -19    0.06    0.41 
   1   4 -19   -0.35    0.35 
   1   4 -19   -0.43    0.44 
   1   4 -19    0.22    0.44 
   1   4 -19    0.01    0.42 
  -1  -4  18    0.29    0.46 
  -1  -4  18   -0.27    0.45 
  -1  -4  18    0.48    0.51 
   1  -4 -18    0.27    0.44 
   1  -4 -18   -0.12    0.40 
   1  -4 -18   -0.03    0.38 
   1   4 -18    0.49    0.38 
   1   4 -18    0.04    0.46 
   1   4 -18    0.32    0.44 
   1   4 -18    0.80    0.46 
  -1  -4  17    1.34    0.52 
  -1  -4  17    1.59    0.51 
  -1  -4  17    1.90    0.56 
   1  -4 -17    1.89    0.53 
   1  -4 -17    1.43    0.49 
   1  -4 -17    1.24    0.44 
   1   4 -17    1.72    0.44 
   1   4 -17    1.67    0.53 
   1   4 -17    1.14    0.47 
   1   4 -17    1.33    0.46 
  -1  -4  16    0.07    0.41 
  -1  -4  16    0.15    0.43 
  -1  -4  16   -0.24    0.42 
  -1   4  16    0.13    0.35 
   1  -4 -16    0.30    0.40 
   1  -4 -16   -0.32    0.37 
   1   4 -16   -0.23    0.31 
   1   4 -16    0.27    0.42 
   1   4 -16    0.12    0.38 
   1   4 -16    0.08    0.38 
  -1  -4  15    0.34    0.40 
  -1  -4  15    0.70    0.45 
  -1  -4  15    0.04    0.42 
  -1   4  15   -0.05    0.31 
   1  -4 -15    0.21    0.38 
   1   4 -15    0.38    0.34 
   1   4 -15    0.48    0.43 
   1   4 -15    0.11    0.37 
   1   4 -15    0.46    0.40 
  -1  -4  14   27.45    1.10 
  -1  -4  14   28.24    1.10 
  -1  -4  14   26.24    1.08 
  -1   4  14   24.54    0.97 
  -1   4  14   27.33    0.90 
   1  -4 -14   26.79    1.05 
   1   4 -14   25.98    0.93 
   1   4 -14   28.58    1.10 
   1   4 -14   26.50    1.01 
   1   4 -14   26.82    1.06 
  -1  -4  13    5.82    0.69 
  -1  -4  13    5.36    0.61 
  -1  -4  13    4.69    0.57 
  -1   4  13    4.85    0.50 
  -1   4  13    5.21    0.54 
   1  -4 -13    5.55    0.62 
   1   4 -13    4.93    0.52 
   1   4 -13    4.85    0.58 
   1   4 -13    5.50    0.62 
   1   4 -13    6.21    0.69 
  -1  -4  12    0.34    0.39 
  -1  -4  12    0.54    0.39 
  -1   4  12    0.58    0.30 
  -1   4  12    0.75    0.31 
   1  -4 -12    0.66    0.37 
   1   4 -12    0.52    0.38 
   1   4 -12    0.80    0.35 
   1   4 -12    0.38    0.38 
  -1  -4  11    0.86    0.37 
  -1  -4  11    1.30    0.42 
  -1   4  11    1.00    0.33 
   1  -4 -11    0.66    0.37 
   1   4 -11    1.04    0.41 
   1   4 -11    1.37    0.38 
   1   4 -11    1.13    0.37 
  -1  -4  10   -0.23    0.32 
  -1  -4  10   -0.25    0.31 
  -1   4  10   -0.42    0.24 
   1  -4 -10    0.16    0.31 
   1   4 -10    0.14    0.34 
   1   4 -10    0.02    0.31 
   1   4 -10   -0.17    0.32 
  -1  -4   9    2.20    0.42 
  -1  -4   9    2.09    0.40 
  -1   4   9    2.16    0.35 
   1  -4  -9    2.43    0.43 
   1   4  -9    1.89    0.40 
   1   4  -9    2.53    0.46 
  -1  -4   8    5.97    0.62 
  -1  -4   8    5.56    0.43 
  -1  -4   8    5.85    0.55 
  -1   4   8    5.40    0.46 
   1  -4  -8    5.90    0.54 
   1   4  -8    6.06    0.57 
  -1  -4   7   -0.03    0.30 
  -1  -4   7    0.01    0.22 
  -1  -4   7    0.06    0.27 
  -1   4   7   -0.06    0.19 
  -1   4   7    0.10    0.25 
   1   4  -7   -0.06    0.28 
  -1  -4   6    1.79    0.38 
  -1  -4   6    2.30    0.30 
  -1  -4   6    2.32    0.37 
  -1   4   6    2.69    0.30 
  -1   4   6    2.01    0.33 
   1   4  -6    2.23    0.39 
  -1  -4   5   35.13    0.96 
  -1  -4   5   35.49    0.78 
  -1   4   5   33.65    0.72 
  -1   4   5   34.00    0.86 
   1   4  -5   33.43    0.90 
  -1  -4   4   18.88    0.74 
  -1  -4   4   19.36    0.62 
  -1   4   4   17.85    0.58 
  -1   4   4   18.32    0.66 
   1   4  -4   18.13    0.70 
  -1  -4   3    4.02    0.45 
  -1  -4   3    4.57    0.42 
  -1   4   3    4.10    0.41 
  -1   4   3    4.50    0.44 
   1   4  -3    4.23    0.47 
  -1   4   2    2.80    0.33 
  -1   4   2    3.35    0.38 
   1   4  -2    2.78    0.38 
  -1   4   1   62.77    1.07 
  -1   4   1   65.91    1.16 
   1  -4  -1   65.89    1.16 
   1   4  -1   66.44    1.13 
  -1   4   0    4.57    0.45 
  -1   4   0    4.82    0.48 
   1  -4   0    4.52    0.48 
   1   4   0    4.75    0.47 
  -1   4  -1   28.90    0.81 
  -1   4  -1   27.83    0.82 
   1  -4   1   28.58    0.80 
   1  -4   1   28.38    0.70 
  -1   4  -2   26.59    0.81 
  -1   4  -2   26.54    0.82 
   1  -4   2   27.42    0.76 
  -1   4  -3    1.78    0.37 
  -1   4  -3    1.36    0.35 
   1  -4   3    1.74    0.32 
  -1   4  -4   43.86    1.04 
  -1   4  -4   44.83    1.05 
   1  -4   4   47.46    0.95 
  -1   4  -5   36.35    0.99 
  -1   4  -5   35.00    0.97 
   1  -4   5   36.23    0.85 
  -1   4  -6   12.64    0.70 
  -1   4  -6   11.73    0.67 
   1  -4   6   12.85    0.58 
   1  -4   6   12.88    0.69 
  -1   4  -7   35.83    1.03 
  -1   4  -7   35.23    1.02 
   1  -4   7   37.77    0.87 
   1  -4   7   37.47    1.03 
  -1   4  -8    1.46    0.41 
  -1   4  -8    1.30    0.40 
  -1   4  -8    1.26    0.38 
   1  -4   8    1.54    0.40 
   1  -4   8    1.88    0.33 
   1  -4   8    1.75    0.41 
   1   4   8    1.43    0.35 
  -1   4  -9   42.55    1.15 
  -1   4  -9   41.47    1.13 
   1  -4   9   41.48    1.15 
   1  -4   9   43.50    0.93 
   1  -4   9   42.44    1.16 
   1   4   9   40.24    1.12 
  -1   4 -10   36.24    1.08 
  -1   4 -10   35.92    0.99 
  -1   4 -10   35.23    1.09 
   1  -4  10   34.56    1.10 
   1  -4  10   38.10    0.89 
   1  -4  10   35.02    1.11 
   1   4  10   34.53    1.08 
  -1  -4 -11    6.93    0.64 
  -1  -4 -11    6.63    0.56 
  -1   4 -11    6.30    0.57 
  -1   4 -11    5.85    0.66 
  -1   4 -11    6.87    0.63 
  -1   4 -11    6.53    0.66 
   1  -4  11    6.96    0.70 
   1  -4  11    6.80    0.72 
   1   4  11    6.89    0.90 
   1   4  11    6.35    0.66 
  -1  -4 -12   10.29    0.74 
  -1  -4 -12   10.68    0.65 
  -1   4 -12   10.07    0.63 
  -1   4 -12    9.51    0.76 
  -1   4 -12   10.13    0.69 
  -1   4 -12    9.46    0.74 
   1  -4  12    9.58    0.77 
   1  -4  12    9.49    0.80 
   1   4  12    9.18    0.62 
   1   4  12    9.43    0.75 
  -1  -4 -13   15.86    0.87 
  -1  -4 -13   17.98    0.80 
  -1   4 -13   16.62    0.81 
  -1   4 -13   17.37    0.87 
  -1   4 -13   17.27    0.84 
  -1   4 -13   16.25    0.90 
   1  -4  13   17.70    0.94 
   1  -4  13   17.01    0.96 
   1   4  13   15.47    0.81 
   1   4  13   16.46    0.91 
  -1  -4 -14    0.38    0.39 
  -1  -4 -14    0.39    0.35 
  -1   4 -14    0.31    0.35 
  -1   4 -14    0.15    0.38 
  -1   4 -14    0.34    0.37 
  -1   4 -14    0.80    0.41 
   1  -4  14    0.10    0.40 
   1  -4  14    0.19    0.46 
   1  -4  14    0.51    0.42 
   1   4  14    0.53    0.39 
   1   4  14    0.31    0.41 
  -1  -4 -15    2.49    0.54 
  -1  -4 -15    2.79    0.48 
  -1   4 -15    2.35    0.48 
  -1   4 -15    2.20    0.52 
  -1   4 -15    2.37    0.50 
  -1   4 -15    2.90    0.54 
   1  -4  15    2.70    0.56 
   1  -4  15    2.49    0.58 
   1  -4  15    2.01    0.50 
   1   4  15    2.01    0.53 
  -1  -4 -16    0.23    0.40 
  -1  -4 -16    0.55    0.36 
  -1   4 -16    0.30    0.37 
  -1   4 -16    0.39    0.43 
  -1   4 -16    0.40    0.40 
  -1   4 -16    0.60    0.44 
   1  -4  16    0.34    0.45 
   1  -4  16    0.64    0.46 
   1  -4  16    0.50    0.46 
   1   4  16    0.81    0.47 
  -1  -4 -17    1.58    0.47 
  -1  -4 -17    1.15    0.41 
  -1   4 -17    1.34    0.46 
  -1   4 -17    1.29    0.52 
  -1   4 -17    1.20    0.49 
  -1   4 -17    1.31    0.49 
   1  -4  17    1.42    0.52 
   1  -4  17    1.01    0.51 
   1  -4  17    1.44    0.55 
   1   4  17    1.44    0.49 
  -1  -4 -18    8.46    0.84 
  -1  -4 -18    9.27    0.76 
  -1   4 -18    8.83    0.78 
  -1   4 -18    9.32    0.91 
  -1   4 -18    9.20    0.89 
  -1   4 -18    7.69    0.82 
   1  -4  18    9.06    0.88 
   1  -4  18    8.05    0.94 
   1  -4  18    7.83    0.91 
   1   4  18    8.33    0.89 
  -1  -4 -19    0.01    0.45 
  -1  -4 -19    0.23    0.37 
  -1   4 -19    0.12    0.41 
  -1   4 -19    0.07    0.46 
  -1   4 -19    0.35    0.45 
  -1   4 -19    0.12    0.44 
   1  -4  19    0.15    0.48 
   1  -4  19    0.04    0.53 
   1  -4  19    0.08    0.53 
   1   4  19    0.46    0.51 
  -1  -5  17   -0.11    0.49 
  -1  -5  17    0.03    0.52 
  -1  -5  17   -0.02    0.48 
  -1   5  17   -0.14    0.40 
   1  -5 -17    0.19    0.50 
   1  -5 -17    0.01    0.47 
   1  -5 -17    0.46    0.46 
   1   5 -17    0.44    0.41 
   1   5 -17    0.15    0.51 
   1   5 -17    0.46    0.46 
   1   5 -17    0.15    0.46 
  -1  -5  16    9.45    0.93 
  -1  -5  16    9.74    1.01 
  -1  -5  16    9.19    0.95 
  -1   5  16    7.96    0.76 
   1  -5 -16    9.39    0.91 
   1  -5 -16    9.16    0.86 
   1   5 -16    9.77    0.76 
   1   5 -16    9.86    0.95 
   1   5 -16    8.19    0.82 
   1   5 -16    9.17    0.89 
  -1  -5  15    1.12    0.50 
  -1  -5  15    1.42    0.54 
  -1  -5  15    1.86    0.56 
  -1   5  15    0.89    0.45 
   1  -5 -15    1.56    0.52 
   1  -5 -15    1.69    0.53 
   1   5 -15    0.67    0.41 
   1   5 -15    1.62    0.55 
   1   5 -15    1.09    0.49 
   1   5 -15    1.00    0.47 
  -1  -5  14    1.42    0.53 
  -1  -5  14    1.37    0.54 
  -1  -5  14    1.14    0.50 
  -1   5  14    1.51    0.44 
   1  -5 -14    1.90    0.56 
   1  -5 -14    1.36    0.50 
   1   5 -14    1.41    0.42 
   1   5 -14    1.26    0.49 
   1   5 -14    1.36    0.48 
   1   5 -14    1.45    0.50 
  -1  -5  13    0.66    0.45 
  -1  -5  13    0.47    0.46 
  -1   5  13    0.18    0.38 
   1  -5 -13    0.36    0.42 
   1   5 -13    0.30    0.37 
   1   5 -13    0.80    0.47 
   1   5 -13    0.63    0.42 
   1   5 -13    1.12    0.47 
  -1  -5  12    8.56    0.81 
  -1  -5  12    9.37    0.82 
  -1   5  12    7.11    0.67 
  -1   5  12    8.58    0.71 
   1  -5 -12    7.55    0.72 
   1   5 -12    7.97    0.63 
   1   5 -12    8.46    0.80 
   1   5 -12    8.28    0.73 
   1   5 -12    7.92    0.78 
  -1  -5  11    8.25    0.79 
  -1  -5  11    7.29    0.74 
  -1   5  11    6.40    0.63 
  -1   5  11    6.76    0.61 
   1  -5 -11    8.27    0.71 
   1   5 -11    7.07    0.60 
   1   5 -11    8.33    0.78 
   1   5 -11    6.90    0.71 
   1   5 -11    6.92    0.68 
  -1  -5  10    3.49    0.57 
  -1  -5  10    3.34    0.53 
  -1   5  10    2.70    0.48 
  -1   5  10    3.07    0.44 
   1  -5 -10    3.05    0.49 
   1   5 -10    2.39    0.44 
   1   5 -10    3.37    0.52 
   1   5 -10    3.48    0.51 
   1   5 -10    2.54    0.50 
  -1  -5   9    1.89    0.48 
  -1  -5   9    1.58    0.43 
  -1   5   9    1.74    0.42 
  -1   5   9    2.01    0.40 
   1  -5  -9    1.68    0.43 
   1   5  -9    1.89    0.39 
   1   5  -9    2.33    0.50 
   1   5  -9    2.06    0.43 
   1   5  -9    1.67    0.44 
  -1  -5   8   11.87    0.79 
  -1  -5   8   11.62    0.76 
  -1   5   8   11.40    0.70 
  -1   5   8   11.05    0.66 
   1  -5  -8   11.67    0.72 
   1   5  -8   10.01    0.79 
   1   5  -8   11.97    0.78 
   1   5  -8   12.11    0.75 
   1   5  -8   11.99    0.79 
  -1  -5   7    0.18    0.37 
  -1  -5   7    0.14    0.43 
  -1  -5   7    0.29    0.34 
  -1   5   7   -0.06    0.27 
  -1   5   7    0.08    0.30 
   1  -5  -7   -0.12    0.33 
   1   5  -7   -0.11    0.35 
   1   5  -7    0.19    0.34 
   1   5  -7   -0.08    0.31 
  -1  -5   6    7.74    0.67 
  -1  -5   6    7.83    0.55 
  -1   5   6    8.16    0.63 
   1   5  -6    7.52    0.67 
   1   5  -6    8.41    0.64 
   1   5  -6    8.18    0.68 
  -1  -5   5    5.50    0.61 
  -1  -5   5    5.73    0.52 
  -1   5   5    5.20    0.48 
  -1   5   5    4.72    0.57 
   1   5  -5    5.46    0.61 
   1   5  -5    4.87    0.58 
  -1  -5   4   23.30    0.90 
  -1  -5   4   24.27    0.80 
  -1   5   4   23.11    0.76 
  -1   5   4   21.58    0.82 
   1   5  -4   22.80    0.89 
   1   5  -4   23.43    0.89 
  -1  -5   3    4.12    0.48 
  -1  -5   3    3.85    0.44 
  -1   5   3    4.34    0.52 
  -1   5   3    4.25    0.48 
   1   5  -3    4.05    0.48 
  -1  -5   2    8.01    0.59 
  -1  -5   2    7.48    0.59 
  -1   5   2    7.50    0.60 
  -1   5   2    8.16    0.63 
   1  -5  -2    8.00    0.70 
   1   5  -2    8.17    0.63 
  -1  -5   1   83.25    1.41 
  -1  -5   1   86.17    1.44 
  -1   5   1   83.65    1.40 
  -1   5   1   83.08    1.49 
   1  -5  -1   84.16    1.50 
   1  -5  -1   86.23    1.42 
   1   5  -1   83.76    1.44 
  -1   5   0  282.85    2.54 
  -1   5   0  284.89    2.65 
   1  -5   0  288.70    2.63 
   1  -5   0  295.49    2.48 
   1   5   0  287.60    2.54 
  -1   5  -1   11.12    0.69 
  -1   5  -1   11.67    0.72 
   1  -5   1   11.09    0.70 
   1  -5   1   12.42    0.64 
   1   5   1   11.39    0.65 
  -1   5  -2    0.88    0.38 
  -1   5  -2    0.33    0.36 
   1  -5   2    1.02    0.36 
   1  -5   2    0.76    0.30 
   1   5   2    0.65    0.34 
  -1   5  -3   52.85    1.27 
  -1   5  -3   53.24    1.27 
  -1   5  -3   51.21    1.20 
   1  -5   3   53.82    1.16 
   1   5   3   50.79    1.10 
  -1   5  -4    7.31    0.67 
  -1   5  -4    7.05    0.66 
  -1   5  -4    7.26    0.65 
   1  -5   4    8.15    0.60 
   1  -5   4    7.54    0.60 
   1   5   4    7.46    0.59 
  -1   5  -5   34.13    1.09 
  -1   5  -5   32.55    1.08 
  -1   5  -5   32.21    1.04 
   1  -5   5   33.64    0.94 
   1  -5   5   34.58    0.98 
   1   5   5   32.35    0.91 
  -1   5  -6    9.05    0.74 
  -1   5  -6    9.06    0.73 
  -1   5  -6    9.38    0.71 
   1  -5   6    9.94    0.78 
   1  -5   6    9.94    0.65 
   1  -5   6   10.07    0.65 
   1   5   6    9.18    0.60 
  -1   5  -7    0.27    0.31 
  -1   5  -7    0.67    0.39 
  -1   5  -7    0.62    0.34 
  -1   5  -7    1.20    0.42 
   1  -5   7    0.92    0.41 
   1  -5   7    0.77    0.33 
   1  -5   7    0.93    0.40 
   1  -5   7    0.37    0.44 
   1   5   7    0.89    0.39 
  -1   5  -8   58.58    1.33 
  -1   5  -8   63.97    1.50 
  -1   5  -8   63.21    1.29 
  -1   5  -8   59.37    1.41 
   1  -5   8   63.07    1.50 
   1  -5   8   67.20    1.26 
   1  -5   8   66.43    1.51 
   1   5   8   57.86    1.35 
  -1   5  -9   -0.21    0.33 
  -1   5  -9    0.37    0.41 
  -1   5  -9    0.49    0.35 
  -1   5  -9    0.20    0.40 
   1  -5   9    0.36    0.40 
   1  -5   9    0.05    0.40 
   1   5   9    0.24    0.34 
  -1   5 -10    1.58    0.43 
  -1   5 -10    1.77    0.51 
  -1   5 -10    2.03    0.45 
  -1   5 -10    1.88    0.49 
   1  -5  10    2.00    0.50 
   1  -5  10    1.54    0.45 
   1   5  10    1.44    0.41 
  -1  -5 -11    3.11    0.56 
  -1   5 -11    2.79    0.51 
  -1   5 -11    2.88    0.55 
  -1   5 -11    3.45    0.53 
  -1   5 -11    2.75    0.55 
   1  -5  11    3.25    0.55 
   1  -5  11    2.79    0.53 
   1   5  11    2.86    0.51 
  -1  -5 -12    4.84    0.65 
  -1   5 -12    5.33    0.62 
  -1   5 -12    5.80    0.70 
  -1   5 -12    6.22    0.70 
  -1   5 -12    6.24    0.72 
   1  -5  12    5.20    0.66 
   1  -5  12    5.98    0.72 
   1   5  12    4.21    0.58 
  -1  -5 -13    9.19    0.82 
  -1   5 -13    9.35    0.73 
  -1   5 -13    8.63    0.84 
  -1   5 -13    8.65    0.74 
  -1   5 -13    8.63    0.84 
   1  -5  13    9.21    0.88 
   1  -5  13    9.82    0.93 
   1   5  13    7.07    0.71 
  -1  -5 -14    0.03    0.41 
  -1   5 -14    0.10    0.38 
  -1   5 -14    0.63    0.47 
  -1   5 -14   -0.05    0.38 
  -1   5 -14    0.10    0.46 
   1  -5  14    0.28    0.46 
   1  -5  14    0.10    0.50 
   1   5  14    0.23    0.41 
  -1  -5 -15    1.00    0.49 
  -1   5 -15    0.87    0.43 
  -1   5 -15    0.86    0.53 
  -1   5 -15    0.52    0.44 
  -1   5 -15    0.69    0.47 
   1  -5  15    1.11    0.54 
   1  -5  15    0.42    0.55 
   1  -5  15    0.99    0.55 
   1   5  15    0.60    0.44 
  -1  -5 -16    5.80    0.75 
  -1   5 -16    5.12    0.66 
  -1   5 -16    5.10    0.72 
  -1   5 -16    6.58    0.81 
  -1   5 -16    4.76    0.68 
   1  -5  16    6.09    0.78 
   1  -5  16    5.81    0.81 
   1  -5  16    4.81    0.72 
  -1  -6  13    0.20    0.50 
  -1  -6  13    0.16    0.50 
  -1   6  13    0.14    0.44 
   1  -6 -13   -0.11    0.46 
   1  -6 -13   -0.01    0.46 
   1   6 -13    0.44    0.43 
   1   6 -13    0.44    0.48 
   1   6 -13    0.44    0.45 
   1   6 -13    0.36    0.49 
  -1  -6  12   -0.08    0.46 
  -1  -6  12   -0.13    0.48 
  -1   6  12    0.02    0.42 
   1  -6 -12   -0.02    0.45 
   1  -6 -12   -0.19    0.44 
   1   6 -12   -0.07    0.39 
   1   6 -12    0.11    0.46 
   1   6 -12   -0.17    0.42 
   1   6 -12   -0.34    0.43 
  -1  -6  11    2.36    0.59 
  -1  -6  11    2.56    0.59 
  -1   6  11    1.93    0.50 
   1  -6 -11    1.70    0.55 
   1  -6 -11    2.31    0.54 
   1   6 -11    1.72    0.54 
   1   6 -11    2.04    0.53 
   1   6 -11    1.79    0.53 
  -1  -6  10   13.16    0.96 
  -1  -6  10   14.08    0.94 
  -1   6  10   12.01    0.83 
   1  -6 -10   13.20    0.98 
   1  -6 -10   13.12    0.89 
   1   6 -10   13.90    0.97 
   1   6 -10   12.16    0.87 
   1   6 -10   13.86    0.96 
  -1  -6   9    1.34    0.51 
  -1  -6   9    1.29    0.49 
  -1   6   9    1.21    0.46 
  -1   6   9    1.18    0.43 
   1  -6  -9    1.01    0.49 
   1  -6  -9    0.86    0.44 
   1   6  -9    1.19    0.51 
   1   6  -9    1.26    0.46 
   1   6  -9    0.98    0.47 
  -1  -6   8    2.95    0.56 
  -1  -6   8    2.98    0.57 
  -1   6   8    2.64    0.49 
  -1   6   8    2.96    0.51 
   1  -6  -8    3.51    0.60 
   1  -6  -8    3.44    0.55 
   1   6  -8    3.04    0.56 
   1   6  -8    3.18    0.53 
   1   6  -8    3.12    0.59 
  -1  -6   7    2.52    0.54 
  -1  -6   7    2.92    0.53 
  -1   6   7    2.73    0.52 
  -1   6   7    2.49    0.49 
   1  -6  -7    2.43    0.54 
   1  -6  -7    3.36    0.54 
   1   6  -7    2.09    0.52 
   1   6  -7    2.51    0.71 
   1   6  -7    2.87    0.54 
  -1  -6   6    3.98    0.58 
  -1  -6   6    4.68    0.61 
  -1   6   6    3.57    0.53 
  -1   6   6    3.82    0.54 
   1  -6  -6    3.96    0.60 
   1  -6  -6    4.51    0.57 
   1   6  -6    3.94    0.59 
   1   6  -6    3.62    0.57 
  -1  -6   5    2.42    0.49 
  -1  -6   5    2.54    0.50 
  -1   6   5    2.75    0.50 
   1  -6  -5    2.46    0.53 
   1  -6  -5    3.27    0.52 
   1   6  -5    2.54    0.52 
   1   6  -5    2.52    0.51 
  -1  -6   4    3.11    0.51 
  -1  -6   4    3.46    0.48 
  -1   6   4    2.91    0.52 
   1  -6  -4    3.55    0.59 
   1  -6  -4    2.97    0.54 
   1   6  -4    2.29    0.50 
   1   6  -4    3.20    0.54 
  -1  -6   3   10.65    0.77 
  -1  -6   3    9.79    0.70 
  -1   6   3   11.20    0.78 
   1  -6  -3    9.42    0.81 
   1  -6  -3   11.98    0.83 
   1   6  -3    9.88    0.77 
   1   6  -3    9.07    0.73 
  -1  -6   2   45.66    1.23 
  -1  -6   2   47.66    1.23 
  -1   6   2   46.31    1.30 
   1  -6  -2   46.70    1.35 
   1  -6  -2   46.46    1.25 
   1   6  -2   45.45    1.26 
   1   6  -2   44.21    1.22 
  -1  -6   1    1.89    0.42 
  -1  -6   1    1.78    0.43 
  -1   6   1    2.14    0.49 
   1  -6  -1    1.65    0.45 
   1  -6  -1    1.46    0.45 
   1   6  -1    2.15    0.48 
   1   6  -1    1.83    0.44 
  -1  -6   0   56.87    1.32 
  -1  -6   0   54.50    1.34 
  -1   6   0   53.70    1.41 
  -1   6   0   54.75    1.28 
   1  -6   0   55.00    1.40 
   1  -6   0   56.08    1.30 
   1   6   0   53.82    1.32 
  -1  -6  -1   27.66    0.97 
  -1  -6  -1   27.43    1.04 
  -1   6  -1   26.61    1.07 
  -1   6  -1   26.35    0.99 
   1  -6   1   27.65    1.03 
   1  -6   1   27.39    1.01 
   1   6   1   25.15    1.00 
  -1  -6  -2   14.83    0.77 
  -1   6  -2   12.81    0.85 
  -1   6  -2   12.89    0.81 
   1  -6   2   14.50    0.82 
   1   6   2   13.18    0.80 
  -1   6  -3   20.25    0.99 
  -1   6  -3   19.72    0.97 
   1  -6   3   21.70    0.94 
   1   6   3   20.54    0.90 
  -1   6  -4   15.90    0.94 
  -1   6  -4   15.95    0.92 
   1  -6   4   17.10    0.96 
   1  -6   4   17.11    0.86 
   1  -6   4   18.33    0.90 
   1   6   4   14.45    0.79 
   1   6   4   16.39    0.83 
  -1   6  -5    0.26    0.41 
  -1   6  -5    0.09    0.40 
   1  -6   5    0.19    0.41 
   1  -6   5    0.19    0.36 
   1  -6   5    0.34    0.38 
   1   6   5    0.01    0.35 
  -1   6  -6    0.29    0.45 
  -1   6  -6    0.33    0.44 
   1  -6   6    0.04    0.41 
   1  -6   6    0.41    0.36 
   1  -6   6    0.18    0.42 
   1   6   6    0.11    0.36 
  -1   6  -7    4.53    0.65 
  -1   6  -7    4.01    0.61 
   1  -6   7    6.25    0.78 
   1  -6   7    4.93    0.64 
   1   6   7    4.78    0.60 
  -1   6  -8    0.53    0.45 
  -1   6  -8    0.33    0.45 
   1  -6   8    0.50    0.47 
   1  -6   8    0.53    0.48 
   1   6   8    0.41    0.40 
  -1  -6  -9    8.80    0.81 
  -1   6  -9    8.45    0.87 
  -1   6  -9    9.34    0.87 
   1  -6   9    9.57    0.93 
   1  -6   9    9.98    0.92 
   1   6   9    8.90    0.77 
  -1  -6 -10    0.97    0.48 
  -1   6 -10    0.68    0.48 
  -1   6 -10    1.27    0.51 
   1  -6  10    1.30    0.53 
   1  -6  10    1.21    0.55 
   1   6  10    0.93    0.45 
  -1  -6 -11    0.25    0.46 
  -1   6 -11    0.01    0.40 
  -1   6 -11   -0.05    0.46 
  -1   6 -11   -0.23    0.45 
   1  -6  11   -0.08    0.48 
   1  -6  11    0.33    0.53 
   1   6  11    0.50    0.41 
  -1  -6 -12    2.32    0.60 
  -1   6 -12    2.55    0.55 
  -1   6 -12    2.65    0.63 
  -1   6 -12    2.69    0.61 
   1  -6  12    2.26    0.59 
   1  -6  12    2.85    0.65 
   1   6  12    2.46    0.55 
  -1  -7   6    2.96    0.60 
  -1  -7   6    2.15    0.56 
  -1   7   6    2.87    0.56 
   1  -7  -6    3.54    0.70 
   1  -7  -6    2.65    0.63 
   1   7  -6    2.52    0.59 
   1   7  -6    1.80    0.55 
  -1  -7   5    0.81    0.48 
  -1  -7   5    0.35    0.45 
  -1   7   5    0.50    0.42 
  -1   7   5    0.67    0.45 
   1  -7  -5    0.34    0.54 
   1  -7  -5    1.19    0.53 
   1   7  -5    0.56    0.48 
   1   7  -5    0.40    0.47 
  -1  -7   4    7.55    0.82 
  -1   7   4    7.54    0.82 
   1  -7  -4    7.55    0.91 
   1  -7  -4    8.83    0.86 
   1   7  -4    8.49    0.89 
   1   7  -4    7.13    0.79 
  -1  -7   3    1.27    0.46 
  -1   7   3    0.97    0.48 
   1  -7  -3    1.08    0.52 
   1  -7  -3    1.28    0.53 
   1   7  -3    0.87    0.49 
   1   7  -3    0.83    0.46 
  -1  -7   2    0.14    0.37 
  -1  -7   2    0.29    0.41 
  -1   7   2    0.21    0.44 
   1  -7  -2    0.41    0.47 
   1  -7  -2    0.31    0.44 
   1   7  -2    0.26    0.44 
   1   7  -2    0.41    0.43 
  -1  -7   1    0.53    0.39 
  -1  -7   1    0.54    0.42 
  -1   7   1    0.15    0.43 
   1  -7  -1    0.34    0.41 
   1  -7  -1    0.18    0.46 
   1  -7  -1    0.27    0.44 
   1   7  -1    0.26    0.45 
  -1  -7   0    1.96    0.51 
  -1  -7   0    1.45    0.50 
  -1   7   0    1.59    0.52 
   1  -7   0    1.93    0.50 
   1  -7   0    1.79    0.53 
   1   7   0    2.00    0.52 
  -1  -7  -1    0.71    0.47 
  -1  -7  -1    0.28    0.46 
  -1   7  -1    0.94    0.50 
  -1   7  -1    1.43    0.48 
   1  -7   1    1.10    0.47 
   1  -7   1    0.64    0.46 
   1   7   1    0.45    0.44 
  -1  -7  -2    0.15    0.45 
  -1  -7  -2    0.11    0.44 
  -1   7  -2    0.35    0.47 
  -1   7  -2    0.67    0.46 
   1  -7   2    0.36    0.43 
   1  -7   2    0.72    0.44 
   1   7   2    0.52    0.45 
  -1  -7  -3    0.58    0.49 
  -1   7  -3    0.48    0.47 
  -1   7  -3    0.12    0.45 
   1  -7   3    0.62    0.45 
   1  -7   3    0.26    0.40 
   1  -7   3   -0.15    0.44 
   1   7   3    0.31    0.41 
  -1  -7  -4    0.86    0.54 
  -1   7  -4    1.10    0.53 
  -1   7  -4    0.67    0.48 
   1  -7   4    1.17    0.50 
   1  -7   4    0.96    0.69 
   1   7   4    0.71    0.44 
  -1   7  -5    1.16    0.54 
  -1   7  -5    1.06    0.52 
   1  -7   5    0.70    0.48 
   1   7   5    0.69    0.46 
  -2   0  24    5.25    0.70 
   2   0 -24    4.20    0.63 
   2   0 -24    4.05    0.60 
   2   0 -24    5.02    0.71 
  -2   0  23    0.10    0.44 
   2   0 -23    0.31    0.40 
   2   0 -23   -0.10    0.34 
   2   0 -23    0.59    0.43 
  -2   0  22    7.04    0.81 
   2   0 -22    5.51    0.66 
   2   0 -22    6.55    0.69 
   2   0 -22    5.96    0.72 
  -2   0  21    0.05    0.39 
   2   0 -21   -0.04    0.30 
   2   0 -21   -0.03    0.31 
   2   0 -21    0.20    0.37 
  -2   0  20    1.65    0.46 
   2   0 -20    1.77    0.42 
   2   0 -20    1.54    0.40 
   2   0 -20    1.35    0.44 
  -2   0  19    0.06    0.28 
  -2   0  19    0.04    0.35 
   2   0 -19    0.18    0.30 
   2   0 -19    0.30    0.34 
  -2   0  18    2.08    0.36 
  -2   0  18    2.19    0.44 
   2   0 -18    2.00    0.38 
   2   0 -18    1.78    0.40 
  -2   0  17    0.22    0.27 
  -2   0  17    0.13    0.31 
   2   0 -17    0.20    0.28 
   2   0 -17    0.02    0.30 
  -2   0  16   16.50    0.65 
  -2   0  16   15.78    0.72 
   2   0 -16   16.47    0.67 
   2   0 -16   15.94    0.72 
  -2   0  15   -0.12    0.23 
  -2   0  15    0.30    0.28 
  -2   0  14    0.21    0.22 
  -2   0  14    0.08    0.27 
  -2   0  13    0.02    0.21 
  -2   0  13   -0.25    0.23 
  -2   0  12   56.29    0.90 
  -2   0  11    0.02    0.19 
  -2   0  10   38.93    0.71 
  -2   0   9    0.03    0.18 
  -2   0   8   11.27    0.40 
  -2   0   7   -0.06    0.17 
  -2   0   6   24.04    0.48 
  -2   0   5    0.12    0.17 
  -2   0   4   42.28    0.53 
  -2   0   3    0.12    0.14 
  -2   0   2    1.20    0.15 
  -2   0   1    0.12    0.10 
  -2   0   0  116.99    0.60 
   2   0   0  105.30    0.67 
   2   0   1   -0.11    0.12 
  -2   0  -5    0.00    0.12 
  -2   0  -6  355.65    1.43 
   2   0   6  358.37    1.42 
  -2   0  -7    0.09    0.14 
   2   0   7    0.01    0.14 
  -2   0  -8  699.62    3.83 
   2   0   8  692.16    3.83 
   2   0   9   -0.19    0.15 
   2   0  10   22.62    0.51 
   2   0  10   23.29    0.66 
   2   0  11    0.08    0.18 
   2   0  11   -0.16    0.23 
   2   0  12    0.54    0.20 
   2   0  13    0.09    0.19 
   2   0  13    0.07    0.29 
  -2   0 -14    5.05    0.53 
   2   0  14    5.03    0.40 
   2   0  14    4.71    0.49 
  -2   0 -15    0.12    0.36 
  -2   0 -15   -0.12    0.29 
   2   0  15    0.23    0.23 
   2   0  15   -0.19    0.25 
   2   0  15    0.03    0.30 
  -2   0 -16    0.12    0.24 
  -2   0 -16    0.28    0.27 
  -2   0 -16    0.31    0.33 
   2   0  16    0.33    0.30 
   2   0  16    0.26    0.33 
  -2   0 -17   -0.14    0.23 
  -2   0 -17   -0.22    0.27 
  -2   0 -17   -0.05    0.32 
   2   0  17   -0.01    0.30 
   2   0  17   -0.02    0.33 
  -2   0 -18   13.79    0.75 
  -2   0 -18   13.51    0.70 
  -2   0 -18   12.78    0.81 
   2   0  18   14.71    0.77 
   2   0  18   13.33    0.77 
  -2   0 -19    0.10    0.32 
  -2   0 -19    0.38    0.38 
   2   0  19   -0.19    0.34 
   2   0  19   -0.07    0.35 
  -2   0 -20    4.16    0.58 
  -2   0 -20    4.01    0.60 
   2   0  20    4.57    0.58 
   2   0  20    4.40    0.57 
  -2   0 -21   -0.09    0.34 
  -2   0 -21    0.23    0.42 
  -2   0 -22    2.52    0.50 
  -2   0 -22    1.90    0.56 
  -2  -1  24   25.21    1.25 
  -2   1  24   24.75    1.11 
   2  -1 -24   23.37    1.12 
   2  -1 -24   24.67    1.15 
   2   1 -24   23.17    1.10 
   2   1 -24   23.53    1.19 
  -2  -1  23    2.19    0.57 
  -2   1  23    2.97    0.55 
   2  -1 -23    1.99    0.51 
   2  -1 -23    1.89    0.52 
   2   1 -23    2.19    0.51 
   2   1 -23    1.81    0.52 
  -2  -1  22    5.11    0.67 
  -2   1  22    5.33    0.63 
   2  -1 -22    4.44    0.59 
   2  -1 -22    4.02    0.60 
   2  -1 -22    4.48    0.55 
   2   1 -22    4.54    0.60 
   2   1 -22    4.54    0.66 
  -2  -1  21   13.19    0.79 
  -2  -1  21   12.69    0.87 
  -2   1  21   13.48    0.81 
   2  -1 -21   13.00    0.80 
   2  -1 -21   13.41    0.86 
   2  -1 -21   11.99    0.72 
   2   1 -21   12.73    0.79 
   2   1 -21   12.25    0.73 
   2   1 -21   12.02    0.85 
  -2  -1  20    0.34    0.36 
  -2  -1  20    0.20    0.39 
  -2   1  20    0.82    0.39 
   2  -1 -20    0.57    0.37 
   2  -1 -20    0.56    0.38 
   2  -1 -20    0.32    0.32 
   2   1 -20    0.69    0.37 
   2   1 -20    0.66    0.32 
   2   1 -20    0.56    0.38 
  -2  -1  19    0.39    0.35 
  -2  -1  19    0.33    0.37 
  -2   1  19    0.57    0.34 
  -2   1  19    0.37    0.44 
   2  -1 -19    0.60    0.34 
   2  -1 -19    0.28    0.35 
   2   1 -19    0.72    0.34 
   2   1 -19    0.08    0.29 
   2   1 -19    0.58    0.37 
  -2  -1  18    5.50    0.59 
  -2  -1  18    5.40    0.64 
  -2   1  18    4.92    0.56 
  -2   1  18    5.31    0.54 
   2  -1 -18    5.61    0.50 
   2  -1 -18    5.25    0.52 
   2  -1 -18    4.82    0.57 
   2   1 -18    5.21    0.53 
   2   1 -18    5.51    0.52 
   2   1 -18    4.68    0.54 
  -2  -1  17   49.42    1.12 
  -2  -1  17   49.66    1.22 
  -2   1  17   50.32    0.96 
  -2   1  17   50.48    1.15 
  -2   1  17   51.72    1.30 
   2  -1 -17   49.31    1.02 
   2  -1 -17   51.13    1.20 
   2  -1 -17   49.09    1.16 
   2   1 -17   50.02    1.07 
   2   1 -17   45.45    1.17 
  -2  -1  16   11.14    0.64 
  -2  -1  16   10.85    0.70 
  -2   1  16   10.28    0.52 
  -2   1  16   10.40    0.64 
   2  -1 -16   10.56    0.56 
   2  -1 -16    9.73    0.61 
   2  -1 -16   10.18    0.61 
   2   1 -16    9.34    0.64 
  -2  -1  15    8.42    0.57 
  -2  -1  15    8.42    0.62 
  -2  -1  15    9.35    0.64 
  -2   1  15    8.25    0.47 
  -2   1  15    8.90    0.57 
   2  -1 -15    8.69    0.51 
   2  -1 -15    8.68    0.57 
   2   1 -15    8.01    0.58 
  -2  -1  14   27.44    0.79 
  -2  -1  14   28.01    0.85 
  -2  -1  14   27.78    0.86 
  -2   1  14   27.59    0.67 
  -2   1  14   28.18    0.80 
   2  -1 -14   27.92    0.72 
   2  -1 -14   30.59    1.08 
  -2  -1  13   89.84    1.27 
  -2  -1  13   93.91    1.38 
  -2  -1  13   93.82    1.38 
  -2   1  13   90.01    1.08 
  -2   1  13   91.47    1.28 
   2  -1 -13   92.03    1.22 
  -2  -1  12    2.81    0.34 
  -2  -1  12    2.35    0.32 
  -2  -1  12    3.37    0.40 
  -2   1  12    2.95    0.32 
  -2  -1  11    5.74    0.43 
  -2  -1  11    6.34    0.46 
  -2   1  11    5.58    0.35 
  -2  -1  10   60.69    0.95 
  -2   1  10   60.76    0.80 
  -2  -1   9   17.27    0.56 
  -2   1   9   16.97    0.45 
  -2  -1   8   38.29    0.72 
  -2   1   8   38.75    0.61 
  -2  -1   7   92.04    1.01 
  -2   1   7   91.55    0.86 
  -2  -1   6  170.03    1.28 
  -2   1   6  166.76    1.09 
  -2  -1   5    9.44    0.39 
  -2   1   5    9.40    0.33 
  -2   1   4   20.95    0.42 
  -2   1   3  181.01    1.04 
  -2  -1   2  473.12    2.95 
  -2   1   2  461.52    2.50 
  -2  -1   1  131.72    0.78 
  -2   1   1  127.91    0.86 
  -2  -1   0  771.61    3.78 
  -2   1   0  732.39    3.61 
  -2  -1  -1  840.25    3.40 
  -2   1  -1  819.58    4.68 
   2   1   1  779.92    3.22 
  -2  -1  -2   67.63    0.32 
  -2   1  -2   66.21    0.72 
   2  -1   2   69.65    0.73 
  -2   1  -3  367.07    1.68 
   2  -1   3  380.32    1.64 
  -2   1  -4  190.31    1.27 
   2  -1   4  200.38    1.26 
  -2   1  -5   58.00    0.76 
   2  -1   5   62.05    0.77 
  -2   1  -6   16.33    0.46 
   2  -1   6   17.50    0.49 
  -2   1  -7    2.61    0.29 
   2  -1   7    2.74    0.30 
  -2   1  -8   33.66    0.67 
   2  -1   8   34.09    0.68 
   2  -1   8   34.92    0.68 
   2   1   8   34.58    0.36 
  -2   1  -9   95.46    1.11 
   2  -1   9   96.62    1.12 
   2  -1   9  103.71    1.32 
   2   1   9   98.20    0.65 
  -2   1 -10   46.46    0.82 
   2  -1  10   47.56    0.85 
   2  -1  10   49.44    0.99 
   2   1  10   47.41    0.51 
   2  -1  11   41.22    0.83 
   2  -1  11   41.98    0.97 
   2   1  11   42.06    0.53 
  -2   1 -12    9.56    0.52 
   2  -1  12    9.03    0.52 
   2  -1  12    9.60    0.62 
   2  -1  12    8.92    0.54 
   2   1  12    9.38    0.32 
  -2  -1 -13   12.85    1.00 
  -2   1 -13   10.96    0.57 
  -2   1 -13   12.63    0.66 
   2  -1  13   10.99    0.57 
   2  -1  13   12.13    0.69 
   2  -1  13   11.87    0.64 
   2   1  13   11.08    0.62 
  -2  -1 -14   -0.07    0.24 
  -2  -1 -14   -0.06    0.28 
  -2   1 -14   -0.18    0.25 
  -2   1 -14    0.20    0.30 
   2  -1  14    0.28    0.27 
   2  -1  14    0.04    0.31 
   2  -1  14    0.07    0.29 
   2   1  14    0.35    0.30 
   2   1  14    0.42    0.30 
  -2  -1 -15    0.22    0.28 
  -2  -1 -15    0.35    0.30 
  -2   1 -15   -0.12    0.24 
  -2   1 -15    0.04    0.28 
  -2   1 -15    0.08    0.31 
   2  -1  15   -0.21    0.27 
   2  -1  15   -0.47    0.28 
   2  -1  15    0.28    0.31 
   2   1  15   -0.03    0.26 
   2   1  15    0.19    0.30 
  -2  -1 -16    3.79    0.47 
  -2  -1 -16    2.93    0.44 
  -2   1 -16    3.21    0.46 
  -2   1 -16    3.20    0.50 
   2  -1  16    3.48    0.43 
   2  -1  16    2.96    0.47 
   2  -1  16    2.89    0.45 
   2  -1  16    4.02    0.45 
   2   1  16    3.46    0.67 
   2   1  16    3.55    0.47 
  -2  -1 -17   22.12    0.87 
  -2  -1 -17   22.54    0.94 
  -2   1 -17   20.52    0.89 
  -2   1 -17   22.46    0.96 
   2  -1  17   23.13    0.82 
   2  -1  17   22.61    1.00 
   2  -1  17   22.17    0.89 
   2  -1  17   22.59    0.96 
   2   1  17   22.45    0.90 
  -2  -1 -18    3.71    0.49 
  -2  -1 -18    3.45    0.55 
  -2   1 -18    3.72    0.52 
  -2   1 -18    3.31    0.53 
   2  -1  18    4.05    0.54 
   2   1  18    3.76    0.52 
  -2  -1 -19    0.05    0.32 
  -2  -1 -19    0.21    0.37 
  -2   1 -19    0.23    0.35 
  -2   1 -19   -0.06    0.36 
   2  -1  19    0.10    0.38 
   2   1  19   -0.01    0.38 
  -2  -1 -20   -0.01    0.31 
  -2  -1 -20    0.29    0.36 
  -2  -1 -20    0.31    0.39 
  -2   1 -20    0.50    0.40 
  -2   1 -20    0.45    0.42 
   2  -1  20    0.01    0.39 
   2   1  20   -0.14    0.41 
  -2  -1 -21    0.11    0.37 
  -2  -1 -21   -0.03    0.36 
  -2  -1 -21    0.45    0.43 
  -2   1 -21    0.09    0.34 
  -2   1 -21   -0.26    0.38 
   2  -1  21    0.22    0.44 
   2   1  21    0.37    0.46 
  -2  -1 -22    0.37    0.42 
  -2  -1 -22    0.20    0.40 
  -2  -1 -22    0.08    0.43 
  -2   1 -22    0.56    0.44 
  -2   1 -22    0.52    0.47 
   2  -1  22   -0.09    0.46 
   2   1  22    0.15    0.46 
  -2  -2  23    3.90    0.62 
  -2  -2  23    3.82    0.68 
  -2   2  23    4.80    0.62 
   2  -2 -23    4.54    0.67 
   2  -2 -23    5.38    0.67 
   2  -2 -23    4.30    0.61 
   2   2 -23    4.42    0.62 
   2   2 -23    4.09    0.66 
  -2  -2  22   15.66    0.96 
  -2  -2  22   14.24    1.02 
  -2   2  22   15.50    0.90 
  -2   2  22   14.42    0.90 
   2  -2 -22   14.53    0.93 
   2  -2 -22   14.03    0.87 
   2  -2 -22   13.95    0.85 
   2   2 -22   14.70    0.87 
   2   2 -22   13.95    0.98 
  -2  -2  21    0.44    0.42 
  -2  -2  21   -0.05    0.45 
  -2   2  21    0.11    0.37 
  -2   2  21    0.19    0.39 
   2  -2 -21    0.09    0.36 
   2  -2 -21    0.25    0.39 
   2  -2 -21    0.28    0.36 
   2  -2 -21   -0.26    0.32 
   2   2 -21    0.40    0.37 
   2   2 -21    0.23    0.44 
   2   2 -21    0.46    0.41 
  -2  -2  20    6.58    0.72 
  -2  -2  20    6.55    0.78 
  -2   2  20    5.69    0.62 
  -2   2  20    6.34    0.70 
   2  -2 -20    5.89    0.65 
   2  -2 -20    5.55    0.67 
   2  -2 -20    5.41    0.64 
   2  -2 -20    5.64    0.59 
   2   2 -20    5.22    0.60 
   2   2 -20    5.65    0.68 
   2   2 -20    6.02    0.63 
  -2  -2  19    3.72    0.53 
  -2  -2  19    3.33    0.58 
  -2  -2  19    3.46    0.59 
  -2   2  19    3.30    0.49 
  -2   2  19    3.77    0.52 
   2  -2 -19    3.31    0.48 
   2  -2 -19    2.95    0.50 
   2  -2 -19    3.18    0.48 
   2  -2 -19    2.82    0.47 
   2   2 -19    3.60    0.50 
   2   2 -19    2.98    0.51 
   2   2 -19    4.49    0.54 
  -2  -2  18   59.28    1.37 
  -2  -2  18   57.26    1.43 
  -2  -2  18   57.87    1.43 
  -2   2  18   58.55    1.30 
  -2   2  18   58.20    1.30 
   2  -2 -18   57.49    1.28 
   2  -2 -18   58.49    1.40 
   2  -2 -18   59.42    1.31 
   2  -2 -18   54.77    1.29 
   2   2 -18   57.08    1.31 
   2   2 -18   55.22    1.40 
   2   2 -18   59.40    1.29 
  -2  -2  17    2.91    0.47 
  -2  -2  17    2.42    0.48 
  -2  -2  17    2.24    0.45 
  -2   2  17    2.49    0.42 
  -2   2  17    2.64    0.44 
   2  -2 -17    2.71    0.43 
   2  -2 -17    2.66    0.44 
   2  -2 -17    3.30    0.44 
   2  -2 -17    2.65    0.43 
   2   2 -17    2.84    0.44 
   2   2 -17    2.93    0.50 
   2   2 -17    1.82    0.40 
  -2  -2  16   94.78    1.59 
  -2  -2  16   96.27    1.67 
  -2  -2  16   96.51    1.67 
  -2   2  16   95.37    1.49 
  -2   2  16   93.45    1.50 
   2  -2 -16   92.80    1.50 
   2  -2 -16   94.11    1.62 
   2  -2 -16   91.95    1.49 
   2   2 -16   93.64    1.63 
   2   2 -16   90.84    1.62 
  -2  -2  15   26.67    0.92 
  -2  -2  15   28.36    0.97 
  -2  -2  15   26.98    0.96 
  -2   2  15   26.62    0.66 
  -2   2  15   26.73    0.83 
  -2   2  15   26.46    0.85 
   2  -2 -15   28.52    0.87 
   2  -2 -15   27.17    0.91 
   2   2 -15   26.65    0.93 
   2   2 -15   26.47    0.93 
  -2  -2  14  211.06    2.18 
  -2  -2  14  211.47    2.21 
  -2  -2  14  211.81    2.25 
  -2   2  14  208.80    1.61 
  -2   2  14  209.08    2.03 
  -2   2  14  203.93    2.45 
   2  -2 -14  209.51    2.08 
   2  -2 -14  206.71    2.20 
   2   2 -14  208.68    2.22 
   2   2 -14  204.95    2.20 
  -2  -2  13    2.53    0.37 
  -2  -2  13    2.51    0.38 
  -2   2  13    2.58    0.32 
  -2   2  13    2.74    0.35 
   2  -2 -13    3.31    0.40 
   2  -2 -13    2.77    0.39 
   2   2 -13    2.80    0.38 
  -2  -2  12   18.08    0.71 
  -2  -2  12   19.56    0.75 
  -2   2  12   18.14    0.51 
  -2   2  12   18.87    0.63 
   2  -2 -12   19.05    0.68 
   2   2 -12   18.47    0.72 
  -2  -2  11    6.59    0.50 
  -2  -2  11    6.45    0.51 
  -2  -2  11    6.78    0.52 
  -2   2  11    6.38    0.36 
   2  -2 -11    6.74    0.48 
   2   2 -11    6.90    0.51 
  -2  -2  10   32.55    0.82 
  -2  -2  10   34.44    0.81 
  -2  -2  10   34.32    0.85 
  -2   2  10   31.50    0.61 
   2   2 -10   32.96    0.82 
  -2  -2   9    1.83    0.31 
  -2   2   9    1.83    0.22 
  -2  -2   8   21.02    0.66 
  -2   2   8   21.39    0.41 
  -2  -2   7   35.90    0.77 
  -2   2   7   34.42    0.50 
  -2  -2   6   20.71    0.60 
  -2   2   6   20.27    0.41 
  -2  -2   5    2.02    0.28 
  -2   2   5    2.42    0.24 
  -2  -2   4   59.01    0.84 
  -2   2   4   57.67    0.69 
  -2  -2   3   70.02    0.86 
  -2   2   3   67.89    0.76 
  -2  -2   2   34.98    0.60 
  -2   2   2   33.35    0.58 
  -2  -2   1    0.23    0.16 
  -2   2   1    0.12    0.16 
   2  -2  -1    0.25    0.21 
  -2  -2   0    3.47    0.27 
  -2   2   0    3.34    0.31 
   2  -2   0    3.72    0.34 
  -2  -2  -1   66.02    0.66 
  -2   2  -1   61.14    0.83 
   2  -2   1   64.87    0.82 
  -2  -2  -2   32.97    0.45 
  -2   2  -2   30.66    0.64 
   2  -2   2   34.01    0.62 
  -2  -2  -3   52.37    0.49 
  -2   2  -3   50.70    0.82 
   2  -2   3   54.62    0.77 
  -2   2  -4    1.53    0.27 
   2  -2   4    1.57    0.24 
  -2  -2  -5   18.09    0.23 
  -2   2  -5   16.64    0.55 
   2  -2   5   18.67    0.52 
   2  -2   6   17.78    0.52 
  -2   2  -7  107.11    1.30 
   2  -2   7  112.10    1.16 
   2  -2   7  113.57    1.37 
  -2   2  -8   64.39    1.05 
   2  -2   8   66.97    0.94 
   2  -2   8   66.96    1.10 
  -2   2  -9    9.03    0.52 
  -2   2  -9    9.62    0.53 
   2  -2   9    8.89    0.52 
   2  -2   9    9.66    0.46 
   2  -2   9   10.08    0.59 
  -2   2 -10   14.97    0.61 
  -2   2 -10   15.96    0.64 
   2  -2  10   15.69    0.67 
   2  -2  10   16.04    0.56 
   2  -2  10   16.44    0.71 
  -2  -2 -11   17.84    0.70 
  -2   2 -11   17.06    0.67 
  -2   2 -11   18.19    0.70 
   2  -2  11   17.54    0.72 
   2  -2  11   18.52    0.61 
   2   2  11   17.75    0.72 
  -2  -2 -12  179.17    2.01 
  -2   2 -12  178.20    1.97 
   2  -2  12  173.87    1.90 
   2  -2  12  179.54    2.08 
   2  -2  12  178.60    1.98 
   2   2  12  178.24    2.00 
  -2  -2 -13    0.09    0.29 
  -2  -2 -13   -0.35    0.26 
  -2   2 -13    0.06    0.29 
  -2   2 -13    0.11    0.28 
   2  -2  13   -0.03    0.30 
   2  -2  13   -0.03    0.35 
   2  -2  13   -0.09    0.31 
   2   2  13    0.07    0.31 
  -2  -2 -14    3.32    0.46 
  -2  -2 -14    2.25    0.39 
  -2   2 -14    2.77    0.41 
  -2   2 -14    3.40    0.44 
  -2   2 -14    2.99    0.46 
   2  -2  14    3.42    0.45 
   2  -2  14    2.54    0.44 
   2  -2  14    3.02    0.45 
   2   2  14    3.05    0.47 
  -2  -2 -15    1.33    0.37 
  -2  -2 -15    0.97    0.35 
  -2   2 -15    1.23    0.37 
  -2   2 -15    1.00    0.37 
  -2   2 -15    0.63    0.36 
  -2   2 -15    0.95    0.48 
   2  -2  15    0.82    0.37 
   2  -2  15    0.60    0.37 
   2  -2  15    0.72    0.40 
   2   2  15    0.83    0.37 
  -2  -2 -16    2.14    0.42 
  -2  -2 -16    2.09    0.41 
  -2   2 -16    2.89    0.47 
  -2   2 -16    2.33    0.44 
  -2   2 -16    2.16    0.45 
  -2   2 -16    2.34    0.43 
   2  -2  16    2.76    0.46 
   2  -2  16    1.78    0.49 
   2  -2  16    2.74    0.50 
   2   2  16    2.40    0.49 
  -2  -2 -17    2.36    0.45 
  -2  -2 -17    2.78    0.49 
  -2   2 -17    2.46    0.47 
  -2   2 -17    2.64    0.47 
  -2   2 -17    2.35    0.46 
  -2   2 -17    3.17    0.49 
   2  -2  17    3.25    0.50 
   2  -2  17    3.29    0.58 
   2  -2  17    2.55    0.50 
   2   2  17    3.24    0.52 
  -2  -2 -18    2.12    0.45 
  -2  -2 -18    1.77    0.46 
  -2   2 -18    1.72    0.45 
  -2   2 -18    1.50    0.43 
  -2   2 -18    1.53    0.46 
  -2   2 -18    2.22    0.45 
   2  -2  18    1.52    0.45 
   2  -2  18    1.59    0.54 
   2  -2  18    1.55    0.48 
   2   2  18    1.45    0.46 
  -2  -2 -19    0.26    0.38 
  -2  -2 -19    0.08    0.35 
  -2  -2 -19    0.09    0.34 
  -2   2 -19    0.22    0.37 
  -2   2 -19    0.31    0.39 
  -2   2 -19   -0.20    0.37 
   2  -2  19    0.21    0.40 
   2  -2  19    0.06    0.43 
   2  -2  19    0.06    0.41 
   2   2  19    0.31    0.41 
  -2  -2 -20    2.86    0.53 
  -2  -2 -20    2.41    0.52 
  -2  -2 -20    2.89    0.51 
  -2   2 -20    3.66    0.60 
  -2   2 -20    3.88    0.64 
   2  -2  20    2.83    0.58 
   2  -2  20    3.44    0.60 
   2   2  20    3.54    0.60 
  -2  -2 -21    0.49    0.42 
  -2  -2 -21    0.36    0.43 
  -2  -2 -21    0.52    0.40 
  -2   2 -21    0.50    0.44 
  -2   2 -21    0.62    0.46 
   2  -2  21    0.38    0.49 
   2  -2  21    0.44    0.49 
   2   2  21    0.48    0.48 
  -2  -3  22    0.42    0.48 
  -2  -3  22   -0.04    0.50 
  -2  -3  22    0.04    0.52 
   2  -3 -22   -0.21    0.43 
   2  -3 -22   -0.16    0.42 
   2  -3 -22   -0.18    0.36 
   2  -3 -22   -0.35    0.36 
   2   3 -22    0.15    0.39 
   2   3 -22    0.06    0.47 
   2   3 -22   -0.29    0.39 
  -2  -3  21    3.03    0.59 
  -2  -3  21    4.46    0.71 
  -2  -3  21    3.84    0.67 
   2  -3 -21    4.33    0.63 
   2  -3 -21    2.79    0.56 
   2  -3 -21    4.30    0.58 
   2  -3 -21    4.11    0.60 
   2   3 -21    3.66    0.56 
   2   3 -21    3.58    0.66 
   2   3 -21    3.78    0.58 
  -2  -3  20    1.49    0.49 
  -2  -3  20    1.08    0.52 
  -2  -3  20    1.37    0.52 
  -2   3  20    1.46    0.43 
   2  -3 -20    1.04    0.47 
   2  -3 -20    1.58    0.48 
   2  -3 -20    1.29    0.41 
   2  -3 -20    0.98    0.43 
   2   3 -20    1.16    0.41 
   2   3 -20    1.12    0.47 
   2   3 -20    1.41    0.52 
   2   3 -20    1.65    0.48 
  -2  -3  19   15.42    0.93 
  -2  -3  19   15.48    0.99 
  -2  -3  19   15.35    0.98 
  -2   3  19   14.81    0.82 
   2  -3 -19   16.33    0.90 
   2  -3 -19   14.73    0.91 
   2  -3 -19   17.03    0.81 
   2  -3 -19   13.24    0.81 
   2   3 -19   15.63    0.82 
   2   3 -19   15.44    0.95 
   2   3 -19   15.76    0.96 
   2   3 -19   15.02    0.87 
  -2  -3  18   12.40    0.88 
  -2  -3  18   13.27    0.91 
  -2  -3  18   12.84    0.91 
  -2   3  18   11.93    0.72 
   2  -3 -18   11.94    0.80 
   2  -3 -18   12.59    0.83 
   2  -3 -18   11.04    0.69 
   2  -3 -18   11.23    0.74 
   2   3 -18   10.90    0.70 
   2   3 -18   12.72    0.87 
   2   3 -18   11.43    0.83 
   2   3 -18   11.78    0.79 
  -2  -3  17   33.30    1.15 
  -2  -3  17   33.30    1.17 
  -2  -3  17   34.42    1.17 
  -2   3  17   33.86    1.01 
   2  -3 -17   32.84    1.09 
   2  -3 -17   32.94    1.14 
   2  -3 -17   33.91    0.99 
   2  -3 -17   30.52    1.06 
   2   3 -17   31.77    1.02 
   2   3 -17   32.43    1.16 
   2   3 -17   31.33    1.12 
   2   3 -17   34.36    1.12 
  -2  -3  16    8.59    0.77 
  -2  -3  16    8.62    0.75 
  -2  -3  16    8.45    0.77 
  -2   3  16    8.67    0.63 
   2  -3 -16    8.48    0.69 
   2  -3 -16    7.66    0.68 
   2  -3 -16    8.88    0.59 
   2  -3 -16    8.29    0.64 
   2   3 -16    8.53    0.60 
   2   3 -16    8.82    0.74 
   2   3 -16    7.73    0.70 
   2   3 -16    8.31    0.68 
  -2  -3  15    2.87    0.50 
  -2  -3  15    2.41    0.47 
  -2  -3  15    3.05    0.53 
  -2   3  15    2.76    0.50 
  -2   3  15    2.62    0.41 
   2  -3 -15    2.75    0.45 
   2  -3 -15    2.88    0.48 
   2  -3 -15    2.77    0.45 
   2   3 -15    2.83    0.49 
   2   3 -15    3.08    0.49 
   2   3 -15    2.60    0.46 
  -2  -3  14   20.38    0.92 
  -2  -3  14   22.36    0.91 
  -2  -3  14   20.26    0.90 
  -2   3  14   21.43    0.78 
   2  -3 -14   20.52    0.85 
   2  -3 -14   20.39    0.85 
   2   3 -14   21.07    0.89 
   2   3 -14   19.92    0.85 
   2   3 -14   19.78    0.84 
  -2  -3  13   30.83    1.00 
  -2  -3  13   32.49    0.99 
  -2  -3  13   31.54    1.01 
  -2   3  13   29.72    0.86 
   2  -3 -13   30.94    0.97 
   2  -3 -13   29.78    0.93 
   2   3 -13   30.24    0.98 
   2   3 -13   29.41    0.95 
   2   3 -13   30.50    1.13 
  -2  -3  12    0.23    0.31 
  -2  -3  12    0.05    0.30 
  -2  -3  12   -0.29    0.30 
  -2   3  12   -0.02    0.24 
   2  -3 -12    0.15    0.27 
   2  -3 -12    0.32    0.27 
   2   3 -12    0.12    0.31 
   2   3 -12    0.02    0.28 
  -2  -3  11    1.47    0.37 
  -2  -3  11    1.42    0.33 
  -2  -3  11    1.36    0.37 
  -2   3  11    1.52    0.31 
   2  -3 -11    1.29    0.34 
   2   3 -11    1.64    0.37 
  -2  -3  10    0.17    0.29 
  -2  -3  10    0.32    0.28 
  -2   3  10    0.19    0.23 
   2  -3 -10    0.50    0.28 
   2   3 -10    0.31    0.30 
  -2  -3   9    1.80    0.33 
  -2  -3   9    1.79    0.21 
  -2  -3   9    1.74    0.31 
  -2   3   9    1.77    0.20 
  -2   3   9    1.68    0.30 
   2   3  -9    1.77    0.33 
  -2  -3   8    9.46    0.56 
  -2  -3   8    9.20    0.35 
  -2  -3   8    9.79    0.52 
  -2   3   8    9.10    0.35 
   2   3  -8    9.35    0.55 
  -2  -3   7   33.85    0.85 
  -2  -3   7   36.04    0.59 
  -2  -3   7   36.35    0.80 
  -2   3   7   33.53    0.59 
   2   3  -7   34.72    0.84 
  -2  -3   6   71.93    1.14 
  -2  -3   6   75.04    0.83 
  -2   3   6   69.46    0.85 
  -2  -3   5   42.96    0.88 
  -2  -3   5   44.75    0.68 
  -2   3   5   42.57    0.71 
  -2  -3   4    9.02    0.48 
  -2   3   4    8.20    0.40 
  -2  -3   3    3.74    0.38 
  -2   3   3    3.50    0.33 
  -2  -3   2   25.06    0.63 
  -2   3   2   23.86    0.61 
   2  -3  -2   25.10    0.68 
  -2  -3   1   30.57    0.66 
  -2   3   1   29.40    0.68 
   2  -3  -1   30.37    0.72 
  -2  -3   0   11.19    0.44 
  -2   3   0   10.76    0.48 
   2  -3   0   10.59    0.49 
  -2  -3  -1  102.11    1.04 
  -2   3  -1   98.14    1.22 
   2  -3   1  102.07    1.21 
  -2   3  -2  203.61    1.78 
   2  -3   2  213.84    1.71 
  -2   3  -3   12.76    0.56 
   2  -3   3   13.41    0.51 
  -2   3  -4    4.07    0.43 
  -2   3  -4    4.03    0.43 
   2  -3   4    4.42    0.39 
  -2   3  -5   10.90    0.57 
  -2   3  -5   10.87    0.53 
   2  -3   5   12.31    0.51 
  -2   3  -6    1.67    0.34 
  -2   3  -6    1.29    0.29 
   2  -3   6    1.50    0.27 
   2  -3   6    1.24    0.32 
  -2   3  -7    0.13    0.28 
  -2   3  -7    0.17    0.27 
   2  -3   7    0.17    0.22 
   2  -3   7    0.19    0.29 
  -2   3  -8   17.37    0.72 
  -2   3  -8   16.81    0.70 
   2  -3   8   17.73    0.60 
   2  -3   8   17.56    0.75 
   2   3   8   16.81    0.70 
  -2   3  -9   56.52    1.18 
  -2   3  -9   56.27    1.17 
   2  -3   9   55.56    1.17 
   2  -3   9   57.52    0.99 
   2  -3   9   58.50    1.22 
   2   3   9   54.41    1.14 
  -2   3 -10  126.15    1.74 
  -2   3 -10  126.80    1.73 
   2  -3  10  129.97    1.77 
   2  -3  10  133.81    1.49 
   2  -3  10  133.39    1.83 
   2   3  10  128.81    1.77 
  -2   3 -11    1.92    0.40 
  -2   3 -11    1.53    0.39 
  -2   3 -11    1.59    0.43 
   2  -3  11    1.95    0.43 
   2  -3  11    1.81    0.34 
   2  -3  11    1.30    0.38 
   2   3  11    1.40    0.39 
  -2  -3 -12    0.56    0.36 
  -2  -3 -12    0.77    0.32 
  -2   3 -12    0.87    0.36 
  -2   3 -12    0.27    0.31 
  -2   3 -12    0.38    0.36 
   2  -3  12    0.44    0.36 
   2  -3  12    0.42    0.29 
   2  -3  12    0.67    0.42 
   2   3  12    0.35    0.35 
  -2  -3 -13    2.94    0.48 
  -2  -3 -13    3.23    0.46 
  -2   3 -13    3.11    0.46 
  -2   3 -13    2.34    0.43 
  -2   3 -13    2.74    0.44 
  -2   3 -13    2.88    0.46 
   2  -3  13    3.27    0.50 
   2  -3  13    2.94    0.39 
   2  -3  13    3.28    0.54 
   2  -3  13    2.67    0.45 
   2   3  13    2.39    0.45 
  -2  -3 -14   28.94    1.00 
  -2  -3 -14   29.76    0.98 
  -2   3 -14   28.50    0.99 
  -2   3 -14   30.50    1.06 
  -2   3 -14   29.68    1.01 
  -2   3 -14   29.24    1.02 
   2  -3  14   30.52    1.05 
   2  -3  14   30.68    1.13 
   2  -3  14   32.07    1.10 
   2   3  14   29.61    1.06 
  -2  -3 -15    1.77    0.45 
  -2  -3 -15    1.70    0.41 
  -2   3 -15    1.37    0.40 
  -2   3 -15    1.93    0.45 
  -2   3 -15    1.79    0.46 
  -2   3 -15    2.12    0.46 
   2  -3  15    2.25    0.48 
   2  -3  15    2.11    0.55 
   2  -3  15    1.52    0.45 
   2   3  15    1.71    0.45 
  -2  -3 -16   12.26    0.80 
  -2  -3 -16   12.11    0.75 
  -2   3 -16   11.80    0.76 
  -2   3 -16   12.51    0.82 
  -2   3 -16   12.38    0.81 
  -2   3 -16   12.11    0.80 
   2  -3  16   12.50    0.82 
   2  -3  16   12.38    0.92 
   2  -3  16   12.63    0.87 
   2   3  16   12.85    0.89 
  -2  -3 -17    0.70    0.41 
  -2  -3 -17    0.86    0.39 
  -2   3 -17    1.14    0.42 
  -2   3 -17    0.55    0.41 
  -2   3 -17    1.05    0.44 
  -2   3 -17    0.81    0.41 
   2  -3  17    0.82    0.45 
   2  -3  17    1.11    0.53 
   2  -3  17    1.11    0.47 
   2   3  17    0.56    0.43 
  -2  -3 -18    6.87    0.74 
  -2  -3 -18    6.86    0.72 
  -2   3 -18    7.10    0.70 
  -2   3 -18    7.40    0.77 
  -2   3 -18    6.88    0.76 
  -2   3 -18    7.46    0.77 
   2  -3  18    6.91    0.80 
   2  -3  18    6.81    0.79 
   2  -3  18    7.24    0.82 
   2   3  18    7.02    0.81 
  -2  -3 -19    0.68    0.45 
  -2  -3 -19    0.37    0.37 
  -2   3 -19    0.48    0.41 
  -2   3 -19    0.73    0.46 
  -2   3 -19    0.54    0.46 
  -2   3 -19    0.18    0.39 
   2  -3  19    0.90    0.48 
   2  -3  19    0.45    0.53 
   2  -3  19    0.54    0.50 
   2   3  19    0.56    0.46 
  -2  -3 -20    3.95    0.65 
  -2  -3 -20    3.49    0.58 
  -2  -3 -20    3.76    0.59 
  -2   3 -20    4.06    0.62 
  -2   3 -20    4.25    0.64 
  -2   3 -20    4.88    0.71 
  -2   3 -20    5.05    0.66 
   2  -3  20    4.76    0.65 
   2  -3  20    4.66    0.75 
   2  -3  20    4.00    0.67 
   2   3  20    4.41    0.68 
  -2  -4  20    6.81    0.80 
  -2  -4  20    6.26    0.82 
  -2  -4  20    4.72    0.74 
   2  -4 -20    6.29    0.77 
   2  -4 -20    5.62    0.75 
   2  -4 -20    5.38    0.68 
   2   4 -20    5.84    0.67 
   2   4 -20    4.97    0.73 
   2   4 -20    4.62    0.70 
   2   4 -20    4.46    0.65 
  -2  -4  19    8.70    0.94 
  -2  -4  19    7.83    0.89 
  -2  -4  19    9.59    0.95 
   2  -4 -19    9.48    0.92 
   2  -4 -19    7.98    0.83 
   2  -4 -19    7.67    0.73 
   2   4 -19    8.47    0.71 
   2   4 -19    9.45    0.92 
   2   4 -19    7.85    0.85 
   2   4 -19    8.24    0.82 
  -2  -4  18    1.36    0.53 
  -2  -4  18    1.38    0.53 
  -2  -4  18    1.09    0.51 
   2  -4 -18    1.44    0.50 
   2  -4 -18    1.42    0.50 
   2  -4 -18    1.52    0.46 
   2   4 -18    1.45    0.44 
   2   4 -18    1.97    0.53 
   2   4 -18    0.93    0.49 
   2   4 -18    1.47    0.51 
  -2  -4  17    1.76    0.53 
  -2  -4  17    1.85    0.54 
  -2  -4  17    1.53    0.52 
  -2   4  17    1.93    0.47 
  -2   4  17    2.35    0.44 
   2  -4 -17    2.16    0.53 
   2  -4 -17    2.79    0.57 
   2  -4 -17    1.65    0.48 
   2   4 -17    2.04    0.44 
   2   4 -17    2.21    0.54 
   2   4 -17    2.95    0.57 
   2   4 -17    1.99    0.50 
  -2  -4  16    0.16    0.42 
  -2  -4  16    0.01    0.43 
  -2  -4  16    0.33    0.43 
  -2   4  16    0.34    0.36 
  -2   4  16    0.04    0.33 
   2  -4 -16   -0.14    0.39 
   2  -4 -16    0.36    0.42 
   2  -4 -16    0.41    0.40 
   2   4 -16    0.48    0.34 
   2   4 -16    1.03    0.44 
   2   4 -16    0.17    0.38 
   2   4 -16    0.34    0.40 
  -2  -4  15    2.82    0.57 
  -2  -4  15    3.00    0.55 
  -2  -4  15    2.93    0.56 
  -2   4  15    2.14    0.46 
  -2   4  15    3.11    0.47 
   2  -4 -15    2.57    0.50 
   2  -4 -15    3.53    0.57 
   2  -4 -15    2.81    0.49 
   2   4 -15    2.76    0.45 
   2   4 -15    2.89    0.55 
   2   4 -15    2.32    0.51 
   2   4 -15    2.96    0.54 
  -2  -4  14    1.65    0.46 
  -2  -4  14    1.83    0.47 
  -2  -4  14    1.73    0.49 
  -2   4  14    1.32    0.38 
  -2   4  14    2.09    0.40 
   2  -4 -14    1.88    0.48 
   2  -4 -14    1.44    0.45 
   2   4 -14    2.03    0.40 
   2   4 -14    1.65    0.48 
   2   4 -14    1.27    0.42 
   2   4 -14    2.00    0.49 
  -2  -4  13    3.77    0.55 
  -2  -4  13    4.80    0.58 
  -2  -4  13    5.10    0.61 
  -2   4  13    4.12    0.49 
  -2   4  13    4.49    0.55 
   2  -4 -13    3.66    0.50 
   2  -4 -13    4.86    0.57 
   2   4 -13    4.95    0.60 
   2   4 -13    4.75    0.57 
   2   4 -13    3.53    0.50 
  -2  -4  12    0.02    0.35 
  -2  -4  12    0.08    0.34 
  -2  -4  12   -0.15    0.36 
  -2   4  12    0.05    0.26 
  -2   4  12    0.25    0.28 
   2  -4 -12    0.32    0.37 
   2  -4 -12   -0.33    0.33 
   2   4 -12    0.31    0.37 
   2   4 -12   -0.17    0.33 
   2   4 -12    0.22    0.36 
  -2  -4  11    7.46    0.68 
  -2  -4  11    8.48    0.66 
  -2   4  11    7.14    0.55 
   2  -4 -11    8.45    0.69 
   2  -4 -11    7.22    0.61 
   2   4 -11    7.31    0.65 
   2   4 -11    6.96    0.66 
   2   4 -11    7.72    0.67 
  -2  -4  10    6.16    0.64 
  -2  -4  10    5.69    0.57 
  -2   4  10    4.90    0.53 
   2  -4 -10    5.00    0.55 
   2  -4 -10    6.08    0.57 
   2   4 -10    5.06    0.54 
   2   4 -10    5.53    0.58 
   2   4 -10    5.31    0.61 
  -2  -4   9   17.33    0.80 
  -2  -4   9   15.49    0.72 
  -2   4   9   17.29    0.69 
   2  -4  -9   15.93    0.72 
   2   4  -9   14.92    0.74 
   2   4  -9   16.02    0.77 
   2   4  -9   15.86    0.77 
  -2  -4   8    0.81    0.34 
  -2  -4   8    0.85    0.32 
  -2   4   8    0.77    0.24 
  -2   4   8    0.76    0.30 
   2  -4  -8    1.25    0.34 
   2   4  -8    0.77    0.33 
  -2  -4   7    0.17    0.30 
  -2  -4   7    0.16    0.21 
  -2  -4   7    0.11    0.27 
  -2   4   7    0.16    0.21 
  -2   4   7    0.33    0.27 
   2  -4  -7    0.37    0.28 
   2   4  -7    0.20    0.29 
  -2  -4   6    3.23    0.41 
  -2  -4   6    3.50    0.38 
  -2  -4   6    3.92    0.45 
  -2   4   6    3.64    0.37 
  -2   4   6    3.64    0.44 
   2   4  -6    3.55    0.42 
  -2  -4   5   23.02    0.79 
  -2  -4   5   23.51    0.65 
  -2   4   5   22.66    0.65 
  -2   4   5   23.29    0.77 
   2  -4  -5   22.26    0.78 
   2   4  -5   23.60    0.78 
  -2  -4   4    0.17    0.27 
  -2  -4   4    0.45    0.23 
  -2   4   4    0.26    0.23 
  -2   4   4    0.52    0.28 
   2  -4  -4    0.42    0.28 
   2   4  -4    0.09    0.27 
  -2  -4   3    6.18    0.48 
  -2   4   3    7.01    0.47 
  -2   4   3    7.12    0.52 
   2  -4  -3    6.95    0.52 
   2   4  -3    6.47    0.50 
  -2  -4   2   14.09    0.60 
  -2   4   2   13.53    0.57 
  -2   4   2   13.92    0.63 
   2  -4  -2   14.27    0.66 
   2  -4  -2   14.88    0.62 
   2   4  -2   14.11    0.62 
  -2  -4   1   27.51    0.75 
  -2   4   1   25.98    0.75 
  -2   4   1   25.58    0.80 
   2  -4  -1   26.90    0.81 
   2  -4  -1   28.28    0.76 
  -2  -4   0   17.47    0.61 
  -2   4   0   16.96    0.66 
  -2   4   0   17.19    0.70 
   2  -4   0   17.90    0.69 
   2  -4   0   18.08    0.61 
  -2  -4  -1    0.40    0.23 
  -2   4  -1    0.41    0.27 
  -2   4  -1    0.22    0.29 
   2  -4   1    0.03    0.26 
   2  -4   1    0.59    0.24 
  -2  -4  -2    0.83    0.23 
  -2   4  -2    1.00    0.32 
  -2   4  -2    1.01    0.33 
   2  -4   2    0.67    0.29 
  -2  -4  -3   42.36    0.79 
  -2   4  -3   39.91    1.00 
  -2   4  -3   39.69    1.00 
   2  -4   3   42.11    0.94 
  -2   4  -4   48.17    1.11 
  -2   4  -4   47.73    1.11 
   2  -4   4   49.69    1.00 
  -2   4  -5    3.81    0.47 
  -2   4  -5    3.91    0.47 
   2  -4   5    4.08    0.47 
  -2   4  -6    3.30    0.46 
  -2   4  -6    3.33    0.47 
   2  -4   6    3.79    0.41 
   2  -4   6    3.69    0.48 
   2   4   6    3.13    0.41 
  -2   4  -7    9.42    0.68 
  -2   4  -7    9.71    0.66 
   2  -4   7    9.71    0.57 
   2  -4   7   10.96    0.71 
   2   4   7   10.03    0.66 
  -2   4  -8   75.25    1.48 
  -2   4  -8   76.45    1.48 
  -2   4  -8   73.18    1.41 
   2  -4   8   80.84    1.28 
   2  -4   8   80.49    1.52 
   2   4   8   75.37    1.46 
  -2   4  -9    0.69    0.50 
  -2   4  -9    0.42    0.36 
  -2   4  -9    1.00    0.38 
  -2   4  -9    0.22    0.34 
   2  -4   9    0.74    0.39 
   2  -4   9    0.58    0.30 
   2  -4   9    0.65    0.41 
   2   4   9    0.54    0.36 
  -2  -4 -10    6.88    0.57 
  -2   4 -10    7.24    0.59 
  -2   4 -10    7.77    0.70 
  -2   4 -10    7.36    0.67 
  -2   4 -10    7.46    0.61 
  -2   4 -10    6.38    0.65 
   2  -4  10    7.37    0.74 
   2  -4  10    7.65    0.58 
   2  -4  10    6.89    0.72 
   2   4  10    6.82    0.68 
  -2  -4 -11    5.62    0.58 
  -2   4 -11    4.74    0.55 
  -2   4 -11    4.46    0.55 
  -2   4 -11    5.30    0.59 
  -2   4 -11    5.62    0.64 
   2  -4  11    5.39    0.61 
   2  -4  11    5.56    0.61 
   2  -4  11    6.30    0.74 
   2   4  11    5.04    0.51 
   2   4  11    5.26    0.60 
  -2  -4 -12    0.38    0.40 
  -2  -4 -12    0.79    0.34 
  -2   4 -12    0.49    0.36 
  -2   4 -12    0.49    0.40 
  -2   4 -12    0.29    0.35 
  -2   4 -12    0.38    0.40 
   2  -4  12    0.73    0.41 
   2  -4  12    0.85    0.46 
   2   4  12    0.45    0.36 
   2   4  12    0.49    0.39 
  -2  -4 -13    0.45    0.36 
  -2  -4 -13    0.05    0.32 
  -2   4 -13   -0.09    0.33 
  -2   4 -13    0.27    0.39 
  -2   4 -13    0.14    0.35 
  -2   4 -13    0.04    0.39 
   2  -4  13    0.35    0.42 
   2  -4  13   -0.28    0.43 
   2   4  13    0.62    0.42 
  -2  -4 -14    0.29    0.38 
  -2  -4 -14    0.22    0.34 
  -2   4 -14    0.03    0.35 
  -2   4 -14    0.16    0.39 
  -2   4 -14    0.02    0.36 
  -2   4 -14    0.11    0.39 
   2  -4  14    0.39    0.44 
   2  -4  14   -0.07    0.40 
   2   4  14    0.20    0.41 
  -2  -4 -15    3.75    0.59 
  -2  -4 -15    4.05    0.55 
  -2   4 -15    3.56    0.55 
  -2   4 -15    3.28    0.55 
  -2   4 -15    3.27    0.56 
  -2   4 -15    3.23    0.54 
   2  -4  15    2.95    0.58 
   2  -4  15    3.05    0.64 
   2  -4  15    3.44    0.58 
   2   4  15    3.03    0.54 
  -2  -4 -16    2.00    0.55 
  -2  -4 -16    2.05    0.48 
  -2   4 -16    2.00    0.48 
  -2   4 -16    2.27    0.53 
  -2   4 -16    2.47    0.53 
  -2   4 -16    2.18    0.52 
   2  -4  16    2.33    0.55 
   2  -4  16    1.42    0.58 
   2  -4  16    1.58    0.52 
   2   4  16    1.90    0.56 
  -2  -4 -17   -0.19    0.42 
  -2  -4 -17    0.07    0.34 
  -2   4 -17   -0.08    0.36 
  -2   4 -17    0.03    0.44 
  -2   4 -17    0.17    0.43 
  -2   4 -17    0.01    0.41 
   2  -4  17    0.54    0.47 
   2  -4  17   -0.54    0.49 
   2  -4  17   -0.23    0.47 
   2   4  17    0.05    0.43 
  -2  -4 -18    6.04    0.75 
  -2  -4 -18    6.04    0.71 
  -2   4 -18    4.16    0.62 
  -2   4 -18    5.66    0.73 
  -2   4 -18    4.98    0.69 
  -2   4 -18    5.66    0.73 
   2  -4  18    5.88    0.73 
   2  -4  18    6.30    0.82 
   2  -4  18    5.75    0.75 
   2   4  18    5.61    0.75 
  -2  -5  17    0.07    0.46 
  -2  -5  17   -0.08    0.51 
  -2  -5  17    0.76    0.54 
  -2   5  17    0.13    0.39 
   2  -5 -17    0.02    0.50 
   2  -5 -17    0.39    0.47 
   2  -5 -17   -0.19    0.41 
   2   5 -17   -0.04    0.39 
   2   5 -17    0.58    0.54 
   2   5 -17   -0.01    0.46 
   2   5 -17   -0.18    0.46 
  -2  -5  16    2.48    0.59 
  -2  -5  16    3.41    0.64 
  -2  -5  16    3.18    0.66 
  -2   5  16    2.45    0.52 
   2  -5 -16    3.15    0.62 
   2  -5 -16    2.73    0.60 
   2  -5 -16    2.60    0.56 
   2   5 -16    3.18    0.53 
   2   5 -16    3.77    0.67 
   2   5 -16    3.37    0.61 
   2   5 -16    2.58    0.58 
  -2  -5  15    1.55    0.54 
  -2  -5  15    1.67    0.55 
  -2  -5  15    1.68    0.57 
  -2   5  15    1.53    0.47 
   2  -5 -15    1.80    0.55 
   2  -5 -15    1.45    0.52 
   2  -5 -15    1.29    0.51 
   2   5 -15    1.44    0.42 
   2   5 -15    1.74    0.57 
   2   5 -15    1.28    0.48 
   2   5 -15    0.96    0.48 
  -2  -5  14    5.66    0.70 
  -2  -5  14    5.42    0.66 
  -2  -5  14    5.91    0.73 
  -2   5  14    4.98    0.62 
  -2   5  14    6.03    0.66 
   2  -5 -14    5.23    0.66 
   2  -5 -14    6.11    0.70 
   2   5 -14    5.55    0.59 
   2   5 -14    5.90    0.71 
   2   5 -14    6.01    0.73 
   2   5 -14    5.31    0.70 
  -2  -5  13    0.60    0.44 
  -2  -5  13    1.30    0.48 
  -2  -5  13    0.95    0.48 
  -2   5  13    0.79    0.38 
  -2   5  13    0.94    0.39 
   2  -5 -13    0.82    0.47 
   2  -5 -13    0.65    0.42 
   2   5 -13    0.78    0.37 
   2   5 -13    1.11    0.47 
   2   5 -13    1.07    0.45 
   2   5 -13    0.64    0.45 
  -2  -5  12    1.25    0.47 
  -2  -5  12    0.78    0.42 
  -2   5  12    0.75    0.37 
  -2   5  12    0.64    0.35 
   2  -5 -12    0.98    0.46 
   2  -5 -12    0.72    0.41 
   2   5 -12    0.98    0.37 
   2   5 -12    1.33    0.46 
   2   5 -12    0.73    0.42 
   2   5 -12    0.70    0.43 
  -2  -5  11   -0.04    0.40 
  -2  -5  11    0.15    0.37 
  -2   5  11   -0.01    0.33 
  -2   5  11   -0.02    0.31 
   2  -5 -11    0.33    0.39 
   2  -5 -11    0.26    0.37 
   2   5 -11    0.03    0.30 
   2   5 -11    0.05    0.39 
   2   5 -11   -0.14    0.35 
   2   5 -11   -0.35    0.37 
  -2  -5  10   11.06    0.81 
  -2  -5  10   12.88    0.79 
  -2   5  10    9.76    0.68 
  -2   5  10   11.07    0.71 
   2  -5 -10   11.46    0.83 
   2  -5 -10   11.01    0.74 
   2   5 -10    9.71    0.64 
   2   5 -10   10.94    0.79 
   2   5 -10   11.76    0.79 
   2   5 -10   11.13    0.81 
  -2  -5   9    0.66    0.39 
  -2  -5   9    0.58    0.38 
  -2   5   9    0.32    0.33 
  -2   5   9    0.32    0.33 
   2  -5  -9    0.76    0.40 
   2  -5  -9    0.95    0.38 
   2   5  -9    0.42    0.39 
   2   5  -9    0.66    0.39 
   2   5  -9    0.50    0.38 
  -2  -5   8    5.29    0.60 
  -2  -5   8    5.88    0.61 
  -2   5   8    5.27    0.52 
  -2   5   8    5.48    0.57 
   2  -5  -8    6.35    0.63 
   2  -5  -8    6.59    0.60 
   2   5  -8    5.93    0.64 
   2   5  -8    6.12    0.66 
   2   5  -8    5.81    0.66 
  -2  -5   7    1.49    0.41 
  -2  -5   7    1.60    0.38 
  -2   5   7    1.65    0.39 
   2  -5  -7    1.56    0.44 
   2  -5  -7    1.98    0.41 
   2   5  -7    1.47    0.42 
   2   5  -7    2.21    0.43 
   2   5  -7    1.57    0.43 
  -2  -5   6    0.22    0.35 
  -2  -5   6    0.12    0.26 
  -2  -5   6   -0.01    0.30 
  -2   5   6   -0.18    0.26 
  -2   5   6    0.06    0.31 
   2  -5  -6    0.00    0.35 
   2  -5  -6    0.12    0.31 
   2   5  -6   -0.27    0.32 
   2   5  -6    0.16    0.35 
   2   5  -6    0.26    0.34 
  -2  -5   5    1.07    0.37 
  -2  -5   5    1.53    0.33 
  -2   5   5    1.43    0.34 
  -2   5   5    1.15    0.37 
   2  -5  -5    1.47    0.43 
   2  -5  -5    1.32    0.36 
   2   5  -5    0.83    0.37 
   2   5  -5    1.15    0.39 
   2   5  -5    1.52    0.40 
  -2  -5   4    6.57    0.59 
  -2  -5   4    5.87    0.51 
  -2   5   4    6.24    0.54 
  -2   5   4    5.81    0.58 
   2  -5  -4    5.85    0.65 
   2  -5  -4    5.48    0.60 
   2  -5  -4    5.40    0.53 
   2   5  -4    5.71    0.62 
   2   5  -4    6.17    0.60 
  -2  -5   3    0.98    0.34 
  -2  -5   3    1.03    0.33 
  -2   5   3    1.14    0.35 
  -2   5   3    0.69    0.36 
   2  -5  -3    0.69    0.37 
   2  -5  -3    0.91    0.37 
   2   5  -3    0.79    0.37 
  -2  -5   2  135.62    1.78 
  -2   5   2  131.06    1.72 
  -2   5   2  133.01    1.87 
   2  -5  -2  134.96    1.91 
   2  -5  -2  138.62    1.81 
   2   5  -2  132.65    1.76 
  -2  -5   1    0.37    0.30 
  -2   5   1    0.34    0.32 
  -2   5   1    0.23    0.36 
   2  -5  -1    0.39    0.37 
   2  -5  -1    0.44    0.33 
   2   5  -1    0.14    0.32 
  -2  -5   0   35.12    0.93 
  -2   5   0   34.56    1.02 
  -2   5   0   33.19    1.03 
   2  -5   0   35.40    1.04 
   2  -5   0   35.17    0.93 
   2   5   0   33.45    0.94 
  -2  -5  -1    3.91    0.47 
  -2   5  -1    3.97    0.51 
  -2   5  -1    3.89    0.50 
   2  -5   1    3.99    0.50 
   2  -5   1    3.85    0.43 
   2   5   1    4.02    0.46 
  -2  -5  -2   21.82    0.73 
  -2   5  -2   21.64    0.88 
  -2   5  -2   21.11    0.90 
  -2   5  -2   21.98    0.91 
   2  -5   2   22.39    0.87 
   2  -5   2   22.02    0.73 
   2   5   2   22.16    0.76 
  -2  -5  -3   38.99    0.90 
  -2   5  -3   37.15    1.10 
  -2   5  -3   37.45    1.12 
  -2   5  -3   36.25    1.06 
   2  -5   3   39.40    1.06 
   2  -5   3   40.31    1.09 
   2   5   3   37.32    0.94 
  -2   5  -4   13.17    0.79 
  -2   5  -4   13.84    0.80 
  -2   5  -4   14.14    0.77 
   2  -5   4   14.06    0.74 
   2  -5   4   14.53    0.76 
   2   5   4   13.19    0.65 
   2   5   4   11.89    1.03 
  -2   5  -5    6.91    0.69 
  -2   5  -5    6.01    0.67 
  -2   5  -5    7.15    0.66 
   2  -5   5    7.67    0.63 
   2  -5   5    6.87    0.63 
   2   5   5    5.75    0.54 
  -2   5  -6    0.13    0.32 
  -2   5  -6    0.28    0.39 
  -2   5  -6   -0.07    0.35 
  -2   5  -6    0.29    0.37 
   2  -5   6    0.56    0.34 
   2  -5   6    0.33    0.34 
  -2  -5  -7    8.10    0.60 
  -2   5  -7    7.74    0.62 
  -2   5  -7    7.92    0.74 
  -2   5  -7    7.54    0.72 
  -2   5  -7    7.75    0.71 
   2  -5   7    8.50    0.64 
   2  -5   7    8.67    0.76 
   2  -5   7    8.60    0.62 
   2   5   7    7.69    0.61 
  -2  -5  -8   22.75    0.86 
  -2   5  -8   19.97    0.88 
  -2   5  -8   22.49    1.02 
  -2   5  -8   22.22    1.01 
  -2   5  -8   22.23    0.99 
   2  -5   8   22.58    1.02 
   2  -5   8   23.79    0.86 
   2  -5   8   22.55    1.03 
   2  -5   8   23.18    1.20 
   2   5   8   18.59    0.84 
  -2  -5  -9    3.51    0.49 
  -2   5  -9    3.90    0.53 
  -2   5  -9    3.11    0.52 
  -2   5  -9    3.61    0.53 
  -2   5  -9    2.98    0.54 
   2  -5   9    3.97    0.58 
   2  -5   9    4.04    0.62 
   2  -5   9    2.94    0.52 
   2   5   9    2.84    0.46 
  -2  -5 -10   -0.18    0.35 
  -2   5 -10   -0.13    0.35 
  -2   5 -10   -0.16    0.37 
  -2   5 -10    0.15    0.35 
  -2   5 -10    0.02    0.40 
   2  -5  10    0.52    0.43 
   2  -5  10    0.35    0.45 
   2   5  10    0.12    0.36 
  -2  -5 -11    6.24    0.82 
  -2   5 -11    6.31    0.64 
  -2   5 -11    5.23    0.65 
  -2   5 -11    6.54    0.66 
  -2   5 -11    5.61    0.69 
   2  -5  11    6.53    0.78 
   2  -5  11    6.26    0.74 
   2   5  11    5.80    0.64 
  -2  -5 -12   -0.09    0.44 
  -2   5 -12    0.27    0.36 
  -2   5 -12    0.12    0.41 
  -2   5 -12    0.23    0.37 
  -2   5 -12    0.35    0.45 
   2  -5  12    0.20    0.44 
   2  -5  12    0.51    0.51 
   2   5  12    0.18    0.39 
  -2  -5 -13    8.49    0.83 
  -2   5 -13    8.33    0.73 
  -2   5 -13    9.81    0.88 
  -2   5 -13    9.43    0.79 
  -2   5 -13    8.51    0.84 
   2  -5  13    8.30    0.88 
   2  -5  13    9.95    0.97 
   2   5  13    8.47    0.75 
  -2  -5 -14   14.07    0.96 
  -2   5 -14   13.30    0.87 
  -2   5 -14   14.23    1.00 
  -2   5 -14   13.82    0.90 
  -2   5 -14   13.25    0.97 
   2  -5  14   15.11    1.03 
   2  -5  14   14.06    1.07 
  -2  -5 -15    0.28    0.44 
  -2   5 -15    0.31    0.42 
  -2   5 -15    0.05    0.47 
  -2   5 -15   -0.03    0.40 
  -2   5 -15    0.05    0.46 
   2  -5  15   -0.07    0.45 
   2  -5  15   -0.04    0.53 
   2  -5  15    0.31    0.49 
  -2  -5 -16    0.06    0.45 
  -2   5 -16    0.05    0.49 
  -2   5 -16   -0.28    0.40 
  -2   5 -16   -0.14    0.44 
   2  -5  16    0.01    0.50 
   2  -5  16    0.10    0.56 
   2  -5  16    0.34    0.52 
  -2  -6  13    5.94    0.77 
  -2  -6  13    5.63    0.73 
  -2  -6  13    5.60    0.77 
  -2   6  13    4.03    0.62 
   2  -6 -13    4.58    0.69 
   2  -6 -13    5.43    0.69 
   2   6 -13    4.53    0.59 
   2   6 -13    5.43    0.74 
   2   6 -13    5.45    0.72 
   2   6 -13    4.91    0.73 
  -2  -6  12    1.81    0.56 
  -2  -6  12    2.08    0.55 
  -2   6  12    1.25    0.48 
  -2   6  12    1.73    0.50 
   2  -6 -12    1.63    0.57 
   2  -6 -12    1.41    0.53 
   2   6 -12    2.31    0.59 
   2   6 -12    1.72    0.54 
   2   6 -12    2.14    0.59 
  -2  -6  11    4.32    0.66 
  -2  -6  11    4.98    0.66 
  -2   6  11    3.98    0.61 
  -2   6  11    3.89    0.56 
   2  -6 -11    4.26    0.69 
   2  -6 -11    4.73    0.64 
   2   6 -11    4.35    0.67 
   2   6 -11    4.65    0.64 
   2   6 -11    4.64    0.68 
  -2  -6  10    0.39    0.45 
  -2  -6  10    0.75    0.46 
  -2   6  10    0.32    0.41 
  -2   6  10   -0.05    0.37 
   2  -6 -10    0.39    0.47 
   2  -6 -10    0.35    0.41 
   2   6 -10    0.21    0.46 
   2   6 -10    0.18    0.42 
   2   6 -10    0.12    0.44 
  -2  -6   9    0.14    0.43 
  -2  -6   9    0.07    0.40 
  -2   6   9    0.02    0.38 
  -2   6   9    0.41    0.38 
   2  -6  -9   -0.26    0.42 
   2  -6  -9    0.00    0.41 
   2   6  -9   -0.60    0.40 
   2   6  -9   -0.23    0.39 
   2   6  -9   -0.09    0.40 
  -2  -6   8    0.05    0.41 
  -2  -6   8    0.39    0.42 
  -2   6   8   -0.07    0.37 
  -2   6   8    0.30    0.38 
   2  -6  -8   -0.02    0.43 
   2  -6  -8    0.53    0.41 
   2   6  -8   -0.14    0.41 
   2   6  -8    0.36    0.41 
   2   6  -8    0.58    0.43 
  -2  -6   7    1.57    0.48 
  -2  -6   7    2.26    0.48 
  -2   6   7    1.56    0.46 
  -2   6   7    1.60    0.45 
   2  -6  -7    2.28    0.57 
   2  -6  -7    1.76    0.52 
   2  -6  -7    1.81    0.46 
   2   6  -7    2.02    0.49 
   2   6  -7    2.33    0.50 
   2   6  -7    1.50    0.46 
  -2  -6   6    0.55    0.42 
  -2  -6   6    0.37    0.39 
  -2   6   6    0.65    0.40 
   2  -6  -6    1.17    0.50 
   2  -6  -6    0.57    0.43 
   2  -6  -6    0.95    0.42 
   2   6  -6    0.91    0.42 
   2   6  -6    0.66    0.40 
   2   6  -6    0.78    0.43 
  -2  -6   5    0.64    0.39 
  -2   6   5    0.63    0.39 
   2  -6  -5    0.53    0.45 
   2  -6  -5    0.51    0.42 
   2  -6  -5    0.46    0.40 
   2   6  -5    0.16    0.39 
   2   6  -5    0.69    0.41 
  -2  -6   4   13.72    0.81 
  -2  -6   4   13.93    0.75 
  -2   6   4   13.48    0.79 
  -2   6   4   13.06    0.86 
   2  -6  -4   12.54    0.88 
   2  -6  -4   13.12    0.84 
   2   6  -4   12.07    0.84 
   2   6  -4   12.45    0.81 
  -2  -6   3   12.49    0.79 
  -2  -6   3   12.92    0.74 
  -2   6   3   12.32    0.77 
  -2   6   3   11.25    0.80 
   2  -6  -3   11.96    0.90 
   2  -6  -3   12.34    0.83 
   2   6  -3   12.17    0.79 
   2   6  -3   11.95    0.80 
  -2  -6   2   12.93    0.78 
  -2  -6   2   12.28    0.75 
  -2   6   2   11.69    0.78 
  -2   6   2   11.95    0.82 
   2  -6  -2   10.75    0.83 
   2  -6  -2   13.50    0.83 
   2   6  -2   11.49    0.77 
   2   6  -2   12.18    0.79 
  -2  -6   1    0.42    0.34 
  -2  -6   1    0.53    0.38 
  -2   6   1    0.19    0.38 
  -2   6   1    0.20    0.40 
  -2   6   1    0.19    0.36 
   2  -6  -1    0.46    0.43 
   2  -6  -1    0.33    0.38 
   2   6  -1    0.38    0.39 
   2   6  -1   -0.17    0.35 
  -2  -6   0   42.18    1.13 
  -2   6   0   38.39    1.18 
  -2   6   0   41.31    1.27 
  -2   6   0   40.80    1.16 
   2  -6   0   42.08    1.26 
   2  -6   0   41.73    1.15 
   2   6   0   41.10    1.17 
   2   6   0   38.80    1.09 
  -2  -6  -1    2.22    0.42 
  -2   6  -1    2.25    0.48 
  -2   6  -1    2.11    0.53 
  -2   6  -1    2.33    0.47 
   2  -6   1    2.08    0.49 
   2   6   1    1.36    0.43 
   2   6   1    2.52    0.44 
  -2   6  -2   32.56    1.14 
  -2   6  -2   33.44    1.19 
  -2   6  -2   32.59    1.11 
   2  -6   2   35.12    1.15 
   2   6   2   29.12    1.00 
   2   6   2   34.44    1.06 
   2   6   2   32.20    1.04 
  -2   6  -3    2.00    0.52 
  -2   6  -3    1.36    0.48 
  -2   6  -3    2.09    0.50 
   2  -6   3    2.21    0.47 
   2  -6   3    1.83    0.48 
   2   6   3    1.80    0.44 
  -2   6  -4    3.91    0.59 
  -2   6  -4    4.89    0.66 
  -2   6  -4    4.84    0.63 
   2  -6   4    5.47    0.68 
   2  -6   4    5.24    0.61 
   2   6   4    4.21    0.54 
  -2   6  -5   -0.13    0.41 
  -2   6  -5   -0.29    0.41 
  -2   6  -5   -0.09    0.41 
   2  -6   5   -0.53    0.35 
   2  -6   5    0.16    0.39 
   2   6   5    0.18    0.36 
  -2   6  -6    0.57    0.44 
  -2   6  -6    0.74    0.46 
   2  -6   6    0.67    0.46 
   2  -6   6    1.10    0.41 
   2  -6   6    0.64    0.49 
   2  -6   6    0.01    0.38 
   2   6   6    0.47    0.37 
  -2   6  -7   23.38    1.14 
  -2   6  -7   24.85    1.13 
   2  -6   7   26.04    1.18 
   2  -6   7   25.68    1.17 
   2   6   7   20.74    0.95 
  -2   6  -8    8.14    0.87 
  -2   6  -8    7.68    0.83 
   2  -6   8    8.06    0.87 
   2  -6   8    8.78    0.89 
   2   6   8    6.62    0.68 
  -2   6  -9    1.67    0.53 
  -2   6  -9    1.93    0.54 
   2  -6   9    3.75    0.65 
   2  -6   9    3.02    0.64 
   2   6   9    2.24    0.50 
  -2   6 -10    0.00    0.39 
  -2   6 -10    0.28    0.49 
  -2   6 -10   -0.20    0.44 
   2  -6  10   -0.11    0.45 
   2  -6  10    0.09    0.52 
   2   6  10    0.18    0.40 
  -2  -6 -11    4.20    0.67 
  -2   6 -11    4.49    0.64 
  -2   6 -11    2.92    0.63 
  -2   6 -11    3.43    0.64 
   2  -6  11    3.75    0.66 
   2  -6  11    4.11    0.71 
   2   6  11    3.98    0.62 
  -2  -6 -12    6.54    0.81 
  -2   6 -12    5.96    0.78 
  -2   6 -12    5.66    0.79 
   2  -6  12    5.58    0.77 
   2  -6  12    5.75    0.80 
  -2  -7   6    0.93    0.46 
  -2  -7   6    0.80    0.49 
  -2   7   6    0.89    0.48 
   2  -7  -6    0.65    0.56 
   2  -7  -6    1.01    0.54 
   2   7  -6    0.77    0.50 
   2   7  -6    0.83    0.47 
  -2  -7   5    9.15    0.85 
  -2  -7   5    7.80    0.79 
  -2   7   5    8.05    0.85 
   2  -7  -5    8.92    0.96 
   2  -7  -5    6.47    0.75 
   2   7  -5    8.15    0.88 
   2   7  -5    7.46    0.84 
  -2  -7   4    2.14    0.51 
  -2   7   4    1.43    0.51 
   2  -7  -4    1.56    0.60 
   2  -7  -4    2.48    0.58 
   2   7  -4    1.86    0.52 
   2   7  -4    1.76    0.52 
  -2  -7   3    1.17    0.45 
  -2   7   3    0.97    0.48 
   2  -7  -3    1.10    0.54 
   2  -7  -3    1.15    0.51 
   2   7  -3    0.34    0.45 
   2   7  -3    0.96    0.47 
  -2  -7   2    0.05    0.38 
  -2  -7   2    0.02    0.38 
  -2   7   2    0.38    0.46 
   2  -7  -2    0.39    0.48 
   2  -7  -2   -0.02    0.44 
   2   7  -2   -0.03    0.41 
  -2  -7   1    3.86    0.58 
  -2   7   1    2.61    0.57 
   2  -7  -1    3.01    0.62 
   2   7  -1    3.27    0.58 
  -2  -7   0   -0.44    0.38 
  -2   7   0    0.13    0.44 
   2  -7   0    0.03    0.44 
   2   7   0   -0.18    0.40 
  -2  -7  -1    1.89    0.52 
  -2   7  -1    1.63    0.56 
  -2   7  -1    1.35    0.49 
   2  -7   1    1.57    0.51 
   2  -7   1    0.78    0.51 
   2   7   1    0.70    0.41 
  -2  -7  -2   39.29    1.36 
  -2   7  -2   37.17    1.39 
  -2   7  -2   34.47    1.26 
   2  -7   2   37.03    1.35 
   2  -7   2   39.59    1.35 
   2  -7   2   38.80    1.38 
   2   7   2   32.18    1.17 
  -2   7  -3    7.48    0.89 
  -2   7  -3    6.08    0.72 
   2  -7   3    7.02    0.86 
   2  -7   3    7.88    0.83 
   2  -7   3    8.22    0.84 
   2   7   3    5.76    0.68 
  -2   7  -4    7.74    0.91 
  -2   7  -4    9.65    0.91 
   2  -7   4    6.99    0.85 
   2  -7   4    8.88    0.83 
   2  -7   4    8.31    0.84 
   2   7   4    6.88    0.70 
  -3   0  24   14.83    1.01 
   3   0 -24   14.45    0.92 
   3   0 -24   16.70    0.96 
   3   0 -24   15.31    0.99 
  -3   0  23    0.54    0.45 
   3   0 -23    0.35    0.40 
   3   0 -23    0.15    0.36 
   3   0 -23    0.11    0.41 
  -3   0  22   23.57    1.07 
   3   0 -22   23.29    1.01 
   3   0 -22   22.48    0.97 
   3   0 -22   22.26    1.02 
  -3   0  21    0.18    0.52 
  -3   0  21    0.29    0.39 
   3   0 -21    0.31    0.34 
   3   0 -21   -0.08    0.32 
   3   0 -21    0.09    0.35 
  -3   0  20   19.66    0.81 
  -3   0  20   18.32    0.91 
   3   0 -20   19.17    0.85 
   3   0 -20   19.05    0.90 
  -3   0  19   -0.07    0.29 
  -3   0  19   -0.13    0.34 
   3   0 -19    0.16    0.30 
   3   0 -19   -0.29    0.30 
  -3   0  18    2.91    0.41 
  -3   0  18    3.21    0.49 
   3   0 -18    2.88    0.41 
   3   0 -18    2.58    0.42 
  -3   0  17    0.12    0.27 
  -3   0  17   -0.06    0.32 
   3   0 -17    0.10    0.27 
   3   0 -17   -0.07    0.26 
  -3   0  16   80.83    1.27 
  -3   0  16   82.02    1.41 
   3   0 -16   81.67    1.35 
   3   0 -16   80.64    1.41 
  -3   0  15    0.04    0.24 
  -3   0  15   -0.34    0.27 
  -3   0  14    1.36    0.29 
  -3   0  14    1.23    0.31 
  -3   0  13    0.11    0.22 
  -3   0  13    0.04    0.25 
  -3   0  12   95.03    1.18 
  -3   0  11    0.06    0.19 
  -3   0  10   99.06    1.12 
  -3   0   9   -0.11    0.18 
  -3   0   8   -0.03    0.18 
  -3   0   7   -0.16    0.17 
  -3   0   6   95.69    0.91 
  -3   0   5    0.00    0.17 
  -3   0   4  271.92    1.64 
  -3   0   3   -0.01    0.15 
  -3   0   1   -0.03    0.14 
  -3   0   0  238.73    1.22 
  -3   0  -2  565.19    3.40 
   3   0   2  591.46    3.23 
  -3   0  -3   -0.05    0.13 
   3   0   3    0.12    0.17 
  -3   0  -4    5.23    0.25 
  -3   0  -5   -0.11    0.12 
  -3   0  -6  168.78    1.08 
  -3   0  -7   -0.01    0.14 
   3   0   7   -0.07    0.14 
  -3   0  -8  164.10    1.16 
   3   0   8  163.31    1.12 
  -3   0  -9   -0.17    0.14 
   3   0   9   -0.13    0.15 
   3   0   9   -0.09    0.20 
  -3   0 -10   45.83    0.69 
   3   0  10   47.20    0.70 
   3   0  10   47.62    0.95 
   3   0  11   -0.11    0.17 
   3   0  11    0.15    0.25 
   3   0  12   25.94    0.60 
  -3   0 -13   -0.03    0.27 
   3   0  13    0.00    0.20 
   3   0  13   -0.22    0.28 
   3   0  13   -0.10    0.31 
   3   0  14   37.37    0.90 
   3   0  14   36.92    0.90 
   3   0  14   36.86    0.99 
  -3   0 -15    0.07    0.28 
  -3   0 -15    0.04    0.31 
   3   0  15   -0.06    0.28 
   3   0  15    0.33    0.32 
  -3   0 -16   22.33    0.87 
  -3   0 -16   24.05    0.80 
  -3   0 -16   22.99    0.94 
   3   0  16   24.88    0.83 
   3   0  16   24.68    0.92 
  -3   0 -17   -0.06    0.30 
  -3   0 -17    0.02    0.32 
   3   0  17    0.09    0.31 
   3   0  17    0.30    0.36 
  -3   0 -18    1.92    0.45 
  -3   0 -18    1.79    0.47 
   3   0  18    2.08    0.46 
  -3   0 -19    0.15    0.35 
  -3   0 -19   -0.27    0.38 
   3   0  19   -0.02    0.39 
  -3   0 -20    2.90    0.54 
  -3   0 -20    3.40    0.59 
   3   0  20    2.87    0.54 
  -3   0 -21    0.30    0.39 
  -3   0 -21   -0.22    0.41 
   3   0  21    0.09    0.42 
  -3   0 -22    2.66    0.58 
  -3  -1  24    1.24    0.54 
  -3   1  24    1.03    0.46 
   3  -1 -24    1.10    0.45 
   3  -1 -24    0.84    0.45 
   3  -1 -24    0.49    0.39 
   3   1 -24    0.73    0.44 
   3   1 -24    0.44    0.49 
  -3  -1  23   17.60    1.05 
  -3   1  23   16.36    0.94 
   3  -1 -23   16.67    0.94 
   3  -1 -23   16.34    0.94 
   3  -1 -23   15.86    0.84 
   3   1 -23   15.78    0.90 
   3   1 -23   17.51    0.90 
   3   1 -23   16.64    1.02 
  -3  -1  22   11.41    0.78 
  -3  -1  22   11.84    0.90 
  -3   1  22   12.00    0.83 
   3  -1 -22   11.04    0.80 
   3  -1 -22   11.67    0.82 
   3  -1 -22   11.26    0.71 
   3   1 -22   11.71    0.78 
   3   1 -22   10.41    0.71 
   3   1 -22   10.78    0.86 
  -3  -1  21    1.39    0.41 
  -3  -1  21    0.81    0.45 
  -3   1  21    1.32    0.42 
   3  -1 -21    1.29    0.42 
   3  -1 -21    1.42    0.43 
   3  -1 -21    1.63    0.40 
   3   1 -21    1.23    0.38 
   3   1 -21    1.60    0.40 
   3   1 -21    1.27    0.46 
  -3  -1  20    2.06    0.44 
  -3  -1  20    1.81    0.46 
  -3   1  20    1.74    0.44 
   3  -1 -20    1.65    0.43 
   3  -1 -20    2.27    0.45 
   3  -1 -20    1.84    0.41 
   3   1 -20    1.74    0.41 
   3   1 -20    2.14    0.40 
   3   1 -20    1.78    0.45 
  -3  -1  19   10.37    0.72 
  -3  -1  19   11.05    0.76 
  -3   1  19    9.84    0.70 
   3  -1 -19   10.61    0.70 
   3  -1 -19   10.39    0.69 
   3  -1 -19   10.10    0.76 
   3   1 -19    9.38    0.64 
   3   1 -19   10.37    0.62 
   3   1 -19    9.59    0.73 
  -3  -1  18    1.10    0.37 
  -3  -1  18    0.60    0.37 
  -3   1  18    0.55    0.28 
  -3   1  18    1.05    0.35 
   3  -1 -18    0.77    0.30 
   3  -1 -18    0.50    0.31 
   3  -1 -18    0.44    0.31 
   3   1 -18    0.53    0.30 
   3   1 -18    0.91    0.38 
  -3  -1  17    0.80    0.34 
  -3  -1  17    0.70    0.38 
  -3   1  17    0.69    0.28 
  -3   1  17    0.78    0.33 
   3  -1 -17    0.69    0.29 
   3  -1 -17    0.50    0.31 
   3  -1 -17    0.57    0.32 
   3   1 -17    0.82    0.29 
   3   1 -17    0.75    0.36 
  -3  -1  16   14.98    0.69 
  -3  -1  16   15.29    0.76 
  -3   1  16   15.13    0.61 
  -3   1  16   14.81    0.69 
   3  -1 -16   14.94    0.62 
   3  -1 -16   14.46    0.70 
   3   1 -16   15.36    0.74 
  -3  -1  15    3.76    0.42 
  -3  -1  15    3.25    0.44 
  -3   1  15    3.87    0.41 
  -3   1  15    3.92    0.43 
   3  -1 -15    4.01    0.42 
   3  -1 -15    3.85    0.44 
   3   1 -15    3.22    0.49 
  -3  -1  14   34.68    0.89 
  -3  -1  14   34.46    0.93 
  -3   1  14   34.33    0.76 
  -3   1  14   34.97    0.88 
   3  -1 -14   35.36    0.81 
   3  -1 -14   35.79    0.97 
  -3  -1  13   22.21    0.72 
  -3  -1  13   22.55    0.73 
  -3  -1  13   24.60    0.79 
  -3   1  13   21.54    0.61 
  -3   1  13   22.27    0.71 
   3  -1 -13   21.72    0.65 
  -3  -1  12   12.05    0.55 
  -3  -1  12   11.76    0.55 
  -3  -1  12   11.60    0.59 
  -3   1  12   11.29    0.48 
  -3  -1  11    0.34    0.24 
  -3  -1  11    0.47    0.24 
  -3   1  11    0.44    0.19 
  -3  -1  10   25.82    0.67 
  -3   1  10   26.31    0.60 
  -3  -1   9   10.52    0.48 
  -3   1   9   10.95    0.42 
  -3  -1   8    3.27    0.36 
  -3   1   8    3.09    0.32 
  -3  -1   7   10.94    0.45 
  -3   1   7   11.28    0.40 
  -3  -1   6    2.82    0.32 
  -3   1   6    3.14    0.29 
  -3  -1   5  122.97    1.07 
  -3   1   5  118.43    1.00 
  -3  -1   4   97.98    0.91 
  -3   1   4   95.55    0.88 
   3  -1  -4   97.66    0.87 
  -3  -1   3 1064.55    6.41 
  -3   1   3 1044.16    6.35 
   3  -1  -3 1082.21    4.97 
  -3  -1   2   11.28    0.34 
   3  -1  -2   11.39    0.38 
  -3  -1   1   44.69    0.51 
  -3   1   1   44.22    0.61 
   3  -1  -1   44.83    0.62 
  -3  -1   0   81.52    0.60 
  -3   1   0   79.64    0.80 
   3  -1   0   81.58    0.80 
  -3  -1  -1  414.67    1.97 
  -3   1  -1  390.60    1.74 
   3  -1   1  422.18    2.13 
  -3  -1  -2  485.67    2.04 
  -3   1  -2  468.99    2.64 
   3  -1   2  492.28    2.01 
   3   1   2  456.61    1.80 
  -3   1  -3   90.76    0.92 
   3  -1   3   94.57    0.95 
  -3   1  -4   36.04    0.63 
   3  -1   4   38.04    0.66 
  -3   1  -5   65.86    0.85 
   3  -1   5   69.22    0.89 
  -3   1  -6   14.93    0.47 
   3  -1   6   15.23    0.50 
  -3   1  -7  183.85    1.47 
   3  -1   7  192.53    1.55 
  -3   1  -8    3.23    0.32 
   3  -1   8    3.06    0.35 
   3  -1   8    3.62    0.42 
  -3   1  -9   17.26    0.55 
   3  -1   9   17.60    0.56 
   3  -1   9   18.56    0.67 
   3   1   9   17.57    0.28 
  -3   1 -10    2.26    0.29 
   3  -1  10    2.30    0.30 
   3  -1  10    1.92    0.35 
   3   1  10    2.12    0.18 
  -3   1 -11   16.40    0.57 
  -3   1 -11   17.17    0.70 
   3  -1  11   15.66    0.58 
   3  -1  11   17.09    0.71 
   3  -1  11   17.02    0.76 
   3   1  11   14.86    0.35 
  -3   1 -12    0.29    0.23 
  -3   1 -12    0.51    0.27 
   3  -1  12    0.87    0.28 
   3  -1  12    0.31    0.32 
   3  -1  12    0.26    0.28 
   3   1  12    0.71    0.32 
  -3  -1 -13    0.01    0.25 
  -3  -1 -13    0.07    0.27 
  -3   1 -13    0.07    0.25 
  -3   1 -13    0.48    0.29 
   3  -1  13    0.14    0.26 
   3  -1  13    0.17    0.34 
   3  -1  13    0.48    0.30 
   3   1  13    0.34    0.31 
  -3  -1 -14    0.13    0.27 
  -3  -1 -14    0.02    0.29 
  -3   1 -14   -0.15    0.29 
  -3   1 -14    0.20    0.28 
  -3   1 -14   -0.04    0.30 
   3  -1  14   -0.06    0.27 
   3  -1  14    0.04    0.30 
   3  -1  14   -0.03    0.31 
   3  -1  14    0.00    0.28 
   3   1  14   -0.04    0.31 
  -3  -1 -15   24.80    0.86 
  -3  -1 -15   23.05    0.90 
  -3   1 -15   22.47    0.84 
  -3   1 -15   23.70    0.82 
  -3   1 -15   23.94    0.93 
   3  -1  15   24.03    0.79 
   3  -1  15   24.68    0.97 
   3  -1  15   24.77    0.86 
   3  -1  15   24.36    0.86 
   3   1  15   22.98    0.89 
  -3  -1 -16   18.19    0.80 
  -3  -1 -16   19.12    0.88 
  -3   1 -16   19.32    0.84 
  -3   1 -16   18.34    0.88 
   3  -1  16   19.93    0.76 
   3  -1  16   18.83    0.92 
   3  -1  16   19.26    0.81 
   3  -1  16   19.34    0.80 
   3   1  16   19.37    0.87 
  -3  -1 -17    3.02    0.46 
  -3  -1 -17    2.97    0.51 
  -3   1 -17    2.58    0.46 
  -3   1 -17    3.39    0.53 
   3  -1  17    3.48    0.56 
   3  -1  17    3.66    0.51 
   3  -1  17    3.55    0.49 
   3   1  17    3.89    0.54 
  -3  -1 -18   -0.08    0.34 
  -3  -1 -18   -0.01    0.31 
  -3  -1 -18    0.57    0.39 
  -3   1 -18    0.30    0.33 
  -3   1 -18    0.26    0.39 
   3  -1  18   -0.10    0.38 
   3  -1  18    0.08    0.35 
   3   1  18    0.00    0.37 
  -3  -1 -19    0.11    0.33 
  -3  -1 -19   -0.10    0.33 
  -3  -1 -19    0.07    0.37 
  -3   1 -19   -0.07    0.32 
  -3   1 -19   -0.12    0.38 
   3  -1  19    0.01    0.37 
   3   1  19    0.10    0.39 
  -3  -1 -20    0.15    0.39 
  -3  -1 -20    0.42    0.35 
  -3  -1 -20    0.34    0.41 
  -3   1 -20    0.01    0.32 
  -3   1 -20    0.26    0.42 
   3  -1  20    0.13    0.42 
   3   1  20    0.64    0.44 
  -3  -1 -21    1.63    0.52 
  -3  -1 -21    1.85    0.48 
  -3  -1 -21    2.28    0.58 
  -3   1 -21    1.64    0.50 
  -3   1 -21    1.63    0.52 
   3  -1  21    2.49    0.55 
   3   1  21    2.05    0.56 
  -3  -2  23    3.59    0.61 
  -3  -2  23    3.43    0.66 
  -3   2  23    3.94    0.60 
   3  -2 -23    2.96    0.58 
   3  -2 -23    3.53    0.58 
   3  -2 -23    3.42    0.55 
   3   2 -23    3.79    0.58 
   3   2 -23    3.20    0.63 
  -3  -2  22    1.07    0.47 
  -3  -2  22    0.90    0.52 
  -3   2  22    1.24    0.44 
   3  -2 -22    0.91    0.44 
   3  -2 -22    1.03    0.43 
   3  -2 -22    1.00    0.42 
   3   2 -22    0.95    0.41 
   3   2 -22    0.72    0.46 
  -3  -2  21    0.58    0.43 
  -3  -2  21    1.00    0.50 
  -3   2  21    0.63    0.39 
   3  -2 -21    0.26    0.37 
   3  -2 -21    0.30    0.38 
   3  -2 -21    0.26    0.35 
   3  -2 -21    0.23    0.35 
   3   2 -21    0.50    0.37 
   3   2 -21    0.04    0.41 
   3   2 -21    0.43    0.38 
  -3  -2  20    5.43    0.62 
  -3  -2  20    5.00    0.63 
  -3   2  20    5.30    0.62 
   3  -2 -20    5.22    0.63 
   3  -2 -20    6.48    0.69 
   3  -2 -20    5.86    0.64 
   3  -2 -20    5.18    0.62 
   3   2 -20    5.51    0.62 
   3   2 -20    5.75    0.70 
   3   2 -20    5.50    0.59 
  -3  -2  19   -0.32    0.35 
  -3  -2  19    0.03    0.38 
  -3  -2  19   -0.10    0.40 
  -3   2  19   -0.01    0.32 
   3  -2 -19    0.17    0.33 
   3  -2 -19    0.11    0.35 
   3  -2 -19   -0.01    0.31 
   3  -2 -19    0.11    0.32 
   3   2 -19   -0.07    0.30 
   3   2 -19   -0.04    0.35 
   3   2 -19   -0.19    0.31 
  -3  -2  18    5.64    0.67 
  -3  -2  18    5.98    0.69 
  -3  -2  18    6.33    0.72 
  -3   2  18    5.64    0.61 
   3  -2 -18    6.28    0.58 
   3  -2 -18    6.50    0.64 
   3  -2 -18    6.11    0.58 
   3  -2 -18    5.25    0.56 
   3   2 -18    5.59    0.53 
   3   2 -18    6.37    0.64 
   3   2 -18    5.05    0.62 
   3   2 -18    5.99    0.63 
  -3  -2  17   43.27    1.18 
  -3  -2  17   45.12    1.22 
  -3  -2  17   44.47    1.25 
  -3   2  17   43.34    1.10 
   3  -2 -17   40.74    1.06 
   3  -2 -17   41.22    1.16 
   3  -2 -17   44.90    1.06 
   3  -2 -17   41.04    1.10 
   3   2 -17   42.77    0.99 
   3   2 -17   40.35    1.16 
   3   2 -17   42.58    1.10 
  -3  -2  16    0.04    0.33 
  -3  -2  16    0.14    0.30 
  -3  -2  16   -0.02    0.35 
  -3   2  16    0.01    0.22 
  -3   2  16    0.05    0.27 
   3  -2 -16    0.09    0.29 
   3  -2 -16   -0.08    0.30 
   3   2 -16    0.01    0.29 
  -3  -2  15    2.53    0.43 
  -3  -2  15    2.21    0.40 
  -3  -2  15    3.16    0.47 
  -3   2  15    2.94    0.33 
  -3   2  15    3.30    0.42 
   3  -2 -15    3.06    0.43 
   3  -2 -15    2.95    0.44 
   3   2 -15    3.44    0.48 
   3   2 -15    2.54    0.42 
  -3  -2  14   20.59    0.82 
  -3  -2  14   21.33    0.81 
  -3  -2  14   22.00    0.82 
  -3   2  14   21.14    0.63 
  -3   2  14   20.64    0.75 
   3  -2 -14   21.13    0.75 
   3  -2 -14   20.23    0.78 
   3   2 -14   20.96    0.81 
   3   2 -14   20.15    0.79 
  -3  -2  13   57.02    1.17 
  -3  -2  13   57.90    1.14 
  -3  -2  13   58.01    1.19 
  -3   2  13   54.88    0.90 
  -3   2  13   55.67    1.07 
   3  -2 -13   56.55    1.10 
   3  -2 -13   55.91    1.14 
   3   2 -13   57.41    1.18 
  -3  -2  12    0.19    0.26 
  -3  -2  12    0.22    0.27 
  -3  -2  12    0.20    0.29 
  -3   2  12    0.19    0.19 
  -3   2  12    0.20    0.23 
   3  -2 -12    0.10    0.26 
   3   2 -12    0.42    0.29 
  -3  -2  11   -0.03    0.25 
  -3  -2  11    0.05    0.23 
  -3  -2  11    0.22    0.28 
  -3   2  11   -0.07    0.17 
  -3   2  11    0.29    0.22 
   3  -2 -11    0.30    0.25 
   3   2 -11    0.28    0.26 
  -3  -2  10    4.38    0.44 
  -3  -2  10    4.99    0.43 
  -3  -2  10    4.86    0.47 
  -3   2  10    4.14    0.34 
   3  -2 -10    4.34    0.43 
   3   2 -10    4.58    0.45 
  -3  -2   9   -0.03    0.23 
  -3   2   9    0.14    0.17 
   3  -2  -9    0.09    0.23 
  -3  -2   8   23.39    0.67 
  -3   2   8   22.89    0.56 
  -3  -2   7    8.15    0.47 
  -3   2   7    8.65    0.34 
  -3  -2   6    2.56    0.31 
  -3   2   6    2.38    0.26 
  -3  -2   5   32.23    0.68 
  -3   2   5   31.38    0.57 
  -3  -2   4    1.08    0.22 
  -3   2   4    1.37    0.21 
  -3  -2   3    8.90    0.40 
  -3   2   3    9.07    0.39 
  -3  -2   2  149.54    1.16 
  -3   2   2  145.88    1.21 
   3  -2  -2  151.58    1.31 
  -3  -2   1   10.86    0.38 
   3  -2  -1   11.47    0.46 
  -3  -2   0  442.73    2.27 
  -3   2   0  413.54    2.11 
   3  -2   0  444.38    2.19 
  -3  -2  -1    3.60    0.24 
  -3   2  -1    3.11    0.34 
   3  -2   1    3.09    0.35 
  -3  -2  -2  283.08    1.16 
  -3   2  -2  270.80    1.82 
   3  -2   2  290.38    1.80 
  -3  -2  -3   54.39    0.46 
  -3   2  -3   50.65    0.85 
   3  -2   3   54.13    0.84 
  -3   2  -4    0.39    0.22 
   3  -2   4    0.47    0.22 
  -3   2  -5    8.96    0.47 
   3  -2   5    9.49    0.44 
   3  -2   6   29.27    0.68 
   3  -2   6   29.36    0.76 
   3  -2   7   44.61    0.84 
   3  -2   7   44.95    0.94 
  -3   2  -8  133.43    1.52 
  -3   2  -8  139.63    1.60 
   3  -2   8  142.34    1.45 
   3  -2   8  141.84    1.62 
  -3   2  -9   11.14    0.56 
  -3   2  -9   10.96    0.55 
   3  -2   9   10.98    0.52 
   3  -2   9   11.76    0.64 
  -3   2 -10  195.03    1.93 
  -3   2 -10  198.46    1.96 
   3  -2  10  190.11    1.90 
   3  -2  10  199.71    1.80 
   3  -2  10  200.69    2.09 
   3   2  10  193.18    2.02 
  -3   2 -11   14.27    0.66 
  -3   2 -11   14.74    0.67 
   3  -2  11   15.55    0.69 
   3  -2  11   16.42    0.65 
   3  -2  11   16.44    0.78 
   3   2  11   16.80    0.74 
  -3  -2 -12   37.34    1.00 
  -3  -2 -12   35.60    0.99 
  -3   2 -12   35.02    0.94 
  -3   2 -12   36.87    0.99 
  -3   2 -12   36.04    0.98 
   3  -2  12   36.16    0.97 
   3  -2  12   37.60    1.08 
   3  -2  12   36.66    1.00 
   3   2  12   37.21    1.03 
  -3  -2 -13    2.26    0.40 
  -3  -2 -13    1.97    0.41 
  -3   2 -13    1.63    0.41 
  -3   2 -13    1.92    0.37 
  -3   2 -13    2.17    0.39 
  -3   2 -13    2.26    0.41 
   3  -2  13    2.07    0.40 
   3  -2  13    2.27    0.47 
   3  -2  13    2.37    0.41 
   3   2  13    2.07    0.40 
  -3  -2 -14   12.62    0.70 
  -3  -2 -14   12.29    0.73 
  -3   2 -14   12.88    0.71 
  -3   2 -14   13.42    0.71 
  -3   2 -14   12.59    0.73 
   3  -2  14   12.75    0.73 
   3  -2  14   13.17    0.82 
   3  -2  14   12.78    0.77 
   3  -2  14   13.53    0.69 
   3   2  14   12.14    0.75 
  -3  -2 -15    0.60    0.32 
  -3  -2 -15    0.63    0.34 
  -3   2 -15    0.78    0.34 
  -3   2 -15    0.73    0.36 
  -3   2 -15    0.54    0.34 
  -3   2 -15    0.60    0.36 
   3  -2  15    0.38    0.35 
   3  -2  15    0.55    0.43 
   3  -2  15    0.61    0.37 
   3  -2  15    1.02    0.35 
   3   2  15    0.84    0.40 
  -3  -2 -16    8.39    0.66 
  -3  -2 -16    7.72    0.68 
  -3   2 -16    7.25    0.60 
  -3   2 -16    8.18    0.66 
  -3   2 -16    7.90    0.70 
  -3   2 -16    8.13    0.65 
   3  -2  16    7.73    0.68 
   3  -2  16    7.71    0.80 
   3  -2  16    8.11    0.76 
   3   2  16    8.36    0.73 
  -3  -2 -17    0.34    0.36 
  -3  -2 -17    0.86    0.39 
  -3   2 -17    1.00    0.36 
  -3   2 -17    0.48    0.37 
  -3   2 -17    0.77    0.39 
  -3   2 -17    0.90    0.39 
   3  -2  17    0.48    0.39 
   3  -2  17    0.03    0.39 
   3  -2  17    0.54    0.42 
   3   2  17    1.43    0.46 
  -3  -2 -18   24.58    1.02 
  -3  -2 -18   23.67    1.05 
  -3   2 -18   24.36    1.05 
  -3   2 -18   26.23    1.03 
  -3   2 -18   23.97    1.07 
  -3   2 -18   25.29    0.99 
   3  -2  18   24.84    0.99 
   3  -2  18   26.23    1.20 
   3  -2  18   24.84    1.06 
   3   2  18   25.26    1.10 
  -3  -2 -19    0.40    0.38 
  -3  -2 -19    0.21    0.39 
  -3   2 -19    0.12    0.38 
  -3   2 -19    0.10    0.37 
  -3   2 -19    0.19    0.41 
   3  -2  19   -0.22    0.46 
   3  -2  19    0.08    0.43 
   3   2  19   -0.28    0.43 
  -3  -2 -20    4.03    0.59 
  -3  -2 -20    4.11    0.62 
  -3  -2 -20    4.67    0.60 
  -3   2 -20    4.09    0.62 
  -3   2 -20    3.94    0.63 
   3  -2  20    3.86    0.67 
   3  -2  20    5.20    0.69 
   3   2  20    3.87    0.65 
  -3  -2 -21    3.08    0.57 
  -3  -2 -21    2.48    0.57 
  -3   2 -21    2.52    0.54 
  -3   2 -21    2.85    0.61 
   3  -2  21    2.73    0.64 
   3  -2  21    2.87    0.62 
   3   2  21    3.55    0.65 
  -3  -3  22    1.98    0.57 
  -3  -3  22    1.49    0.59 
  -3  -3  22    1.31    0.57 
  -3   3  22    1.93    0.50 
   3  -3 -22    1.62    0.53 
   3  -3 -22    1.31    0.52 
   3  -3 -22    1.72    0.50 
   3   3 -22    2.03    0.49 
   3   3 -22    1.89    0.58 
   3   3 -22    1.60    0.51 
  -3  -3  21    1.82    0.54 
  -3  -3  21    0.67    0.50 
  -3  -3  21    1.46    0.57 
  -3   3  21    1.18    0.45 
   3  -3 -21    1.38    0.49 
   3  -3 -21    0.91    0.49 
   3  -3 -21    1.21    0.47 
   3   3 -21    1.03    0.43 
   3   3 -21    1.13    0.51 
   3   3 -21    0.74    0.44 
  -3  -3  20    0.21    0.42 
  -3  -3  20   -0.15    0.44 
  -3  -3  20    0.32    0.48 
  -3   3  20    0.11    0.36 
   3  -3 -20   -0.18    0.37 
   3  -3 -20   -0.03    0.39 
   3  -3 -20    0.24    0.38 
   3   3 -20   -0.02    0.34 
   3   3 -20    0.34    0.42 
   3   3 -20   -0.31    0.36 
  -3  -3  19    5.10    0.64 
  -3  -3  19    6.04    0.70 
  -3  -3  19    4.58    0.65 
  -3   3  19    5.15    0.59 
   3  -3 -19    5.58    0.68 
   3  -3 -19    4.23    0.59 
   3  -3 -19    4.20    0.55 
   3   3 -19    4.66    0.56 
   3   3 -19    4.41    0.61 
   3   3 -19    5.88    0.73 
   3   3 -19    4.83    0.59 
  -3  -3  18    0.39    0.42 
  -3  -3  18    0.96    0.47 
  -3  -3  18    0.62    0.47 
  -3   3  18    0.80    0.37 
   3  -3 -18    0.70    0.40 
   3  -3 -18    0.36    0.35 
   3  -3 -18    0.70    0.39 
   3   3 -18    0.53    0.33 
   3   3 -18    0.92    0.45 
   3   3 -18    0.50    0.41 
   3   3 -18    0.82    0.39 
  -3  -3  17    5.29    0.62 
  -3  -3  17    6.25    0.71 
  -3  -3  17    6.16    0.75 
  -3   3  17    5.49    0.58 
   3  -3 -17    4.94    0.57 
   3  -3 -17    5.56    0.64 
   3  -3 -17    5.63    0.60 
   3   3 -17    6.08    0.55 
   3   3 -17    6.53    0.72 
   3   3 -17    5.90    0.68 
   3   3 -17    5.79    0.66 
  -3  -3  16   56.67    1.39 
  -3  -3  16   60.68    1.41 
  -3  -3  16   60.02    1.45 
  -3   3  16   53.58    1.32 
  -3   3  16   58.93    1.29 
   3  -3 -16   59.48    1.37 
   3  -3 -16   58.71    1.40 
   3  -3 -16   53.28    1.30 
   3   3 -16   59.79    1.44 
   3   3 -16   55.42    1.36 
   3   3 -16   55.94    1.33 
  -3  -3  15   21.96    0.94 
  -3  -3  15   23.60    0.93 
  -3  -3  15   22.98    0.97 
  -3   3  15   22.57    0.85 
   3  -3 -15   22.87    0.92 
   3  -3 -15   22.17    0.90 
   3  -3 -15   20.56    0.84 
   3   3 -15   23.21    0.96 
   3   3 -15   21.85    0.92 
   3   3 -15   21.82    0.90 
  -3  -3  14   30.59    1.02 
  -3  -3  14   30.63    0.98 
  -3  -3  14   31.32    1.04 
  -3   3  14   28.43    0.88 
   3  -3 -14   30.98    0.99 
   3  -3 -14   30.17    0.98 
   3  -3 -14   26.34    1.11 
   3   3 -14   29.79    1.01 
   3   3 -14   28.87    0.98 
   3   3 -14   29.49    0.99 
  -3  -3  13    3.99    0.51 
  -3  -3  13    4.82    0.52 
  -3  -3  13    3.64    0.50 
  -3   3  13    3.88    0.44 
   3  -3 -13    3.42    0.45 
   3  -3 -13    3.62    0.47 
   3   3 -13    3.67    0.49 
   3   3 -13    3.35    0.45 
   3   3 -13    4.15    0.57 
  -3  -3  12    4.53    0.56 
  -3  -3  12    4.94    0.54 
  -3  -3  12    5.08    0.54 
  -3   3  12    4.04    0.45 
   3  -3 -12    4.87    0.55 
   3  -3 -12    4.30    0.46 
   3   3 -12    5.65    0.58 
   3   3 -12    4.34    0.53 
  -3  -3  11    0.45    0.32 
  -3  -3  11    0.59    0.31 
  -3  -3  11    0.39    0.29 
  -3   3  11    0.45    0.26 
   3  -3 -11    0.53    0.30 
   3  -3 -11    0.67    0.31 
   3   3 -11    0.20    0.28 
  -3  -3  10    0.12    0.28 
  -3  -3  10    0.07    0.24 
  -3  -3  10    0.01    0.28 
  -3   3  10   -0.07    0.16 
  -3   3  10    0.27    0.24 
   3  -3 -10    0.05    0.28 
   3  -3 -10   -0.10    0.27 
   3   3 -10    0.02    0.27 
  -3  -3   9    1.72    0.35 
  -3  -3   9    1.85    0.31 
  -3  -3   9    1.67    0.33 
  -3   3   9    1.86    0.23 
  -3   3   9    1.71    0.31 
   3  -3  -9    1.84    0.35 
   3   3  -9    1.90    0.34 
  -3  -3   8   33.98    0.88 
  -3  -3   8   36.34    0.54 
  -3  -3   8   37.00    0.81 
  -3   3   8   33.52    0.64 
  -3   3   8   33.96    0.82 
   3  -3  -8   34.49    0.88 
   3   3  -8   35.78    0.87 
  -3  -3   7    8.22    0.53 
  -3  -3   7    8.43    0.33 
  -3   3   7    7.56    0.38 
  -3   3   7    7.91    0.57 
   3  -3  -7    8.23    0.53 
   3   3  -7    8.15    0.51 
  -3  -3   6    2.66    0.35 
  -3  -3   6    2.55    0.27 
  -3   3   6    2.54    0.30 
   3  -3  -6    3.27    0.39 
  -3  -3   5    1.44    0.27 
  -3   3   5    1.45    0.23 
   3  -3  -5    1.10    0.29 
  -3  -3   4   29.85    0.72 
  -3   3   4   28.21    0.64 
   3  -3  -4   29.61    0.77 
   3  -3  -4   30.61    0.75 
  -3  -3   3  202.61    1.67 
  -3   3   3  192.74    1.60 
   3  -3  -3  198.79    1.79 
  -3  -3   2   73.61    0.99 
  -3   3   2   69.90    1.01 
  -3  -3   1   97.03    1.08 
  -3   3   1   93.49    1.18 
   3  -3  -1   96.87    1.24 
  -3  -3   0    0.62    0.20 
  -3   3   0    0.64    0.25 
   3  -3   0    0.69    0.25 
  -3  -3  -1   50.85    0.73 
  -3   3  -1   48.58    0.92 
   3  -3   1   50.85    0.92 
  -3  -3  -2  205.50    1.33 
  -3   3  -2  191.39    1.79 
  -3   3  -2  200.10    2.23 
   3  -3   2  202.75    1.75 
  -3  -3  -3    4.12    0.28 
  -3   3  -3    3.80    0.39 
   3  -3   3    3.81    0.39 
  -3  -3  -4    0.76    0.16 
  -3   3  -4    0.88    0.29 
  -3   3  -4    0.70    0.29 
   3  -3   4    0.77    0.26 
  -3  -3  -5    2.99    0.22 
  -3   3  -5    2.43    0.32 
  -3   3  -5    2.99    0.38 
   3  -3   5    3.16    0.39 
  -3  -3  -6    1.82    0.17 
  -3   3  -6    1.55    0.34 
  -3   3  -6    2.03    0.36 
   3  -3   6    1.91    0.32 
   3  -3   6    1.46    0.35 
  -3   3  -7  110.09    1.55 
  -3   3  -7  114.22    1.56 
   3  -3   7  119.37    1.43 
   3  -3   7  119.12    1.62 
   3   3   7  114.82    1.57 
  -3   3  -8    0.88    0.33 
  -3   3  -8    0.73    0.32 
   3  -3   8    0.94    0.30 
   3  -3   8    0.54    0.35 
   3   3   8    0.84    0.32 
  -3   3  -9   15.94    0.75 
  -3   3  -9   15.90    0.73 
   3  -3   9   16.83    0.67 
   3  -3   9   17.01    0.80 
   3   3   9   17.45    0.77 
  -3  -3 -10    9.14    0.68 
  -3   3 -10    8.51    0.65 
  -3   3 -10    9.34    0.64 
   3  -3  10    9.41    0.69 
   3  -3  10    9.88    0.59 
   3  -3  10    9.10    0.71 
   3   3  10    8.83    0.66 
  -3  -3 -11   69.36    1.33 
  -3   3 -11   60.53    2.05 
  -3   3 -11   67.73    1.37 
  -3   3 -11   68.77    1.38 
  -3   3 -11   67.83    1.30 
  -3   3 -11   66.66    1.36 
   3  -3  11   70.01    1.39 
   3  -3  11   71.77    1.22 
   3  -3  11   70.06    1.45 
   3   3  11   67.18    1.40 
  -3  -3 -12   33.95    1.03 
  -3   3 -12   32.59    1.01 
  -3   3 -12   34.17    1.05 
  -3   3 -12   34.41    1.05 
  -3   3 -12   33.98    1.02 
  -3   3 -12   33.20    1.04 
   3  -3  12   32.93    1.05 
   3  -3  12   35.95    0.93 
   3  -3  12   35.64    1.15 
   3  -3  12   36.49    0.95 
   3   3  12   35.17    1.10 
  -3  -3 -13   37.90    1.14 
  -3  -3 -13   36.88    1.10 
  -3   3 -13   35.80    1.09 
  -3   3 -13   36.83    1.10 
  -3   3 -13   38.58    1.16 
  -3   3 -13   35.78    1.06 
  -3   3 -13   36.45    1.10 
   3  -3  13   36.86    1.14 
   3  -3  13   38.71    0.99 
   3  -3  13   37.25    1.21 
   3   3  13   36.19    1.11 
  -3  -3 -14    1.91    0.42 
  -3  -3 -14    2.01    0.43 
  -3   3 -14    1.35    0.37 
  -3   3 -14    1.71    0.43 
  -3   3 -14    2.03    0.42 
  -3   3 -14    1.79    0.45 
   3  -3  14    1.60    0.45 
   3  -3  14    2.09    0.44 
   3  -3  14    1.73    0.49 
   3  -3  14    2.07    0.46 
   3   3  14    2.00    0.48 
  -3  -3 -15    0.86    0.40 
  -3  -3 -15    0.96    0.40 
  -3   3 -15    0.41    0.36 
  -3   3 -15    1.09    0.42 
  -3   3 -15    1.15    0.42 
  -3   3 -15    1.02    0.42 
   3  -3  15    1.08    0.42 
   3  -3  15    0.91    0.49 
   3  -3  15    1.12    0.45 
   3   3  15    0.76    0.44 
  -3  -3 -16    0.82    0.42 
  -3  -3 -16    0.65    0.40 
  -3   3 -16    0.90    0.39 
  -3   3 -16    0.98    0.41 
  -3   3 -16    0.96    0.43 
  -3   3 -16    0.54    0.41 
   3  -3  16    0.52    0.42 
   3  -3  16    0.73    0.52 
   3  -3  16    0.69    0.45 
   3   3  16    0.46    0.42 
  -3  -3 -17    0.19    0.37 
  -3  -3 -17    0.06    0.35 
  -3   3 -17   -0.19    0.34 
  -3   3 -17    0.07    0.39 
  -3   3 -17    0.24    0.40 
  -3   3 -17    0.12    0.38 
   3  -3  17    0.00    0.41 
   3  -3  17   -0.47    0.45 
   3  -3  17   -0.10    0.42 
   3   3  17    0.39    0.44 
  -3  -3 -18    2.10    0.51 
  -3  -3 -18    1.87    0.48 
  -3   3 -18    2.01    0.50 
  -3   3 -18    2.19    0.53 
  -3   3 -18    2.27    0.53 
  -3   3 -18    1.87    0.49 
   3  -3  18    1.56    0.51 
   3  -3  18    1.27    0.52 
   3  -3  18    2.57    0.59 
   3   3  18    2.04    0.56 
  -3  -3 -19    2.30    0.56 
  -3  -3 -19    1.58    0.48 
  -3   3 -19    1.56    0.49 
  -3   3 -19    1.71    0.51 
  -3   3 -19    1.40    0.51 
  -3   3 -19    1.71    0.50 
   3  -3  19    1.31    0.52 
   3  -3  19    2.05    0.62 
   3  -3  19    1.55    0.57 
   3   3  19    1.28    0.55 
  -3  -4  20    0.36    0.49 
  -3  -4  20    0.55    0.54 
  -3  -4  20    0.43    0.51 
  -3   4  20    0.54    0.42 
   3  -4 -20    1.25    0.52 
   3  -4 -20    0.52    0.47 
   3  -4 -20    0.84    0.44 
   3   4 -20    0.96    0.43 
   3   4 -20    0.75    0.51 
   3   4 -20    0.92    0.50 
   3   4 -20    0.67    0.48 
  -3  -4  19    0.04    0.46 
  -3  -4  19   -0.03    0.45 
  -3  -4  19    0.42    0.50 
  -3   4  19   -0.10    0.36 
   3  -4 -19   -0.09    0.42 
   3  -4 -19   -0.42    0.40 
   3  -4 -19    0.19    0.40 
   3   4 -19   -0.07    0.34 
   3   4 -19    0.54    0.45 
   3   4 -19   -0.21    0.43 
   3   4 -19    0.02    0.43 
  -3  -4  18    0.54    0.46 
  -3  -4  18    0.98    0.50 
  -3  -4  18    0.29    0.49 
  -3   4  18    0.33    0.43 
  -3   4  18    0.63    0.39 
   3  -4 -18    0.61    0.46 
   3  -4 -18    0.75    0.47 
   3  -4 -18    0.49    0.42 
   3   4 -18    0.37    0.36 
   3   4 -18    0.60    0.48 
   3   4 -18    0.26    0.44 
   3   4 -18    0.51    0.46 
  -3  -4  17   63.27    1.64 
  -3  -4  17   64.47    1.60 
  -3  -4  17   64.48    1.67 
  -3   4  17   55.70    1.47 
  -3   4  17   62.89    1.42 
   3  -4 -17   64.46    1.61 
   3  -4 -17   63.25    1.60 
   3  -4 -17   60.10    1.54 
   3   4 -17   61.65    1.40 
   3   4 -17   64.53    1.65 
   3   4 -17   60.57    1.56 
   3   4 -17   63.30    1.59 
  -3  -4  16    0.35    0.43 
  -3  -4  16    0.68    0.44 
  -3  -4  16    0.26    0.46 
  -3   4  16    0.76    0.42 
  -3   4  16    0.49    0.36 
   3  -4 -16    0.49    0.43 
   3  -4 -16    0.64    0.38 
   3  -4 -16    0.15    0.37 
   3   4 -16    0.61    0.34 
   3   4 -16    0.80    0.47 
   3   4 -16    0.75    0.44 
   3   4 -16    0.48    0.40 
  -3  -4  15   -0.08    0.40 
  -3  -4  15   -0.30    0.36 
  -3  -4  15    0.12    0.42 
  -3   4  15    0.14    0.35 
  -3   4  15   -0.10    0.31 
   3  -4 -15   -0.05    0.39 
   3  -4 -15    0.27    0.39 
   3  -4 -15   -0.02    0.36 
   3   4 -15    0.03    0.30 
   3   4 -15    0.07    0.39 
   3   4 -15   -0.19    0.37 
   3   4 -15    0.16    0.40 
  -3  -4  14   -0.03    0.37 
  -3  -4  14    0.05    0.37 
  -3  -4  14    0.55    0.43 
  -3   4  14    0.09    0.30 
  -3   4  14   -0.12    0.31 
   3  -4 -14    0.26    0.38 
   3  -4 -14   -0.12    0.35 
   3  -4 -14    0.12    0.35 
   3   4 -14    0.03    0.39 
   3   4 -14    0.11    0.38 
   3   4 -14    0.01    0.37 
  -3  -4  13   59.69    1.44 
  -3  -4  13   61.59    1.36 
  -3  -4  13   61.43    1.44 
  -3   4  13   52.91    1.29 
  -3   4  13   59.67    1.29 
   3  -4 -13   60.44    1.41 
   3  -4 -13   59.57    1.38 
   3  -4 -13   57.16    1.36 
   3   4 -13   60.69    1.43 
   3   4 -13   60.57    1.39 
   3   4 -13   59.24    1.39 
  -3  -4  12    3.33    0.53 
  -3  -4  12    3.17    0.48 
  -3  -4  12    2.53    0.47 
  -3   4  12    2.71    0.46 
  -3   4  12    3.30    0.45 
   3  -4 -12    2.53    0.47 
   3  -4 -12    3.35    0.50 
   3  -4 -12    3.05    0.46 
   3   4 -12    2.48    0.46 
   3   4 -12    3.22    0.49 
   3   4 -12    2.47    0.44 
  -3  -4  11   -0.01    0.34 
  -3  -4  11   -0.22    0.28 
  -3  -4  11    0.23    0.34 
  -3   4  11    0.23    0.29 
   3  -4 -11   -0.12    0.35 
   3  -4 -11    0.01    0.30 
   3   4 -11   -0.12    0.32 
   3   4 -11    0.09    0.31 
   3   4 -11    0.09    0.34 
  -3  -4  10   16.73    0.82 
  -3  -4  10   18.92    0.76 
  -3   4  10   17.17    0.73 
   3  -4 -10   17.60    0.83 
   3  -4 -10   18.61    0.78 
   3   4 -10   18.36    0.81 
   3   4 -10   17.01    0.79 
   3   4 -10   18.14    0.83 
  -3  -4   9    0.94    0.36 
  -3  -4   9    1.10    0.33 
  -3   4   9    0.75    0.31 
  -3   4   9    0.82    0.31 
   3  -4  -9    1.00    0.37 
   3  -4  -9    0.65    0.32 
   3   4  -9    0.79    0.34 
   3   4  -9    0.94    0.36 
   3   4  -9    0.98    0.39 
  -3  -4   8    0.37    0.32 
  -3  -4   8    0.36    0.28 
  -3   4   8    0.58    0.24 
  -3   4   8    0.28    0.29 
   3  -4  -8    0.81    0.36 
   3  -4  -8    0.51    0.29 
   3   4  -8   -0.01    0.28 
  -3  -4   7    0.63    0.32 
  -3  -4   7    1.01    0.25 
  -3  -4   7    0.95    0.29 
  -3   4   7    0.87    0.26 
  -3   4   7    0.83    0.30 
   3  -4  -7    0.95    0.31 
   3   4  -7    0.79    0.30 
  -3  -4   6   24.09    0.83 
  -3  -4   6   25.72    0.64 
  -3  -4   6   25.77    0.75 
  -3   4   6   24.33    0.69 
  -3   4   6   24.01    0.79 
   3  -4  -6   24.40    0.83 
   3   4  -6   24.11    0.80 
  -3  -4   5   14.80    0.68 
  -3  -4   5   15.02    0.55 
  -3   4   5   14.35    0.58 
  -3   4   5   13.76    0.64 
   3  -4  -5   14.86    0.69 
   3   4  -5   14.47    0.64 
  -3  -4   4    5.22    0.49 
  -3   4   4    5.15    0.44 
  -3   4   4    5.36    0.50 
   3  -4  -4    5.20    0.54 
   3  -4  -4    5.42    0.51 
   3   4  -4    5.55    0.50 
  -3  -4   3    9.81    0.54 
  -3   4   3    9.76    0.53 
  -3   4   3    9.28    0.57 
   3  -4  -3    9.68    0.61 
   3  -4  -3   10.37    0.58 
   3   4  -3    9.31    0.52 
  -3  -4   2   20.47    0.67 
  -3   4   2   19.82    0.70 
  -3   4   2   19.88    0.73 
   3  -4  -2   20.00    0.76 
   3  -4  -2   22.11    0.72 
  -3  -4   1   10.19    0.52 
  -3   4   1    9.28    0.55 
  -3   4   1    9.49    0.59 
   3  -4  -1    9.96    0.60 
   3  -4  -1   10.00    0.53 
  -3  -4   0   20.79    0.64 
  -3   4   0   19.85    0.72 
  -3   4   0   19.45    0.72 
   3  -4   0   20.74    0.75 
   3  -4   0   21.55    0.68 
  -3  -4  -1   25.61    0.67 
  -3   4  -1   23.60    0.79 
  -3   4  -1   23.74    0.78 
   3  -4   1   23.72    0.79 
   3  -4   1   25.12    0.69 
  -3  -4  -2    0.73    0.24 
  -3   4  -2    0.54    0.30 
  -3   4  -2    0.43    0.28 
   3  -4   2    0.12    0.27 
  -3  -4  -3   41.73    0.75 
  -3   4  -3   39.58    1.02 
  -3   4  -3   39.90    1.00 
   3  -4   3   42.58    0.99 
   3   4   3   40.48    1.00 
  -3  -4  -4    1.83    0.25 
  -3   4  -4    1.48    0.37 
  -3   4  -4    1.07    0.36 
   3  -4   4    1.65    0.35 
   3   4   4    1.65    0.36 
  -3   4  -5    5.01    0.57 
  -3   4  -5    5.54    0.58 
   3  -4   5    6.06    0.51 
   3   4   5    5.54    0.55 
  -3   4  -6    0.65    0.35 
  -3   4  -6    0.80    0.35 
  -3   4  -6    0.84    0.35 
   3  -4   6    0.70    0.30 
   3  -4   6    0.61    0.36 
   3  -4   6    0.57    0.37 
   3   4   6    0.62    0.33 
  -3   4  -7   21.16    0.89 
  -3   4  -7   20.64    0.87 
  -3   4  -7   21.66    0.87 
   3  -4   7   22.99    0.80 
   3  -4   7   21.79    0.91 
   3  -4   7   23.41    0.82 
   3   4   7   21.34    0.83 
  -3  -4  -8    0.05    0.28 
  -3   4  -8    0.11    0.30 
  -3   4  -8    0.03    0.35 
  -3   4  -8    0.02    0.32 
  -3   4  -8   -0.03    0.29 
   3  -4   8   -0.10    0.29 
   3  -4   8   -0.14    0.36 
   3  -4   8    0.47    0.32 
   3   4   8    0.26    0.35 
   3   4   8    0.11    0.32 
  -3  -4  -9   49.53    1.15 
  -3   4  -9   45.86    1.18 
  -3   4  -9   47.81    1.26 
  -3   4  -9   45.92    1.20 
  -3   4  -9   47.36    1.24 
   3  -4   9   51.84    1.12 
   3  -4   9   48.69    1.26 
   3  -4   9   50.82    1.12 
   3   4   9   46.58    1.24 
   3   4   9   42.82    1.17 
  -3  -4 -10   15.56    0.76 
  -3   4 -10   15.97    0.79 
  -3   4 -10   16.35    0.87 
  -3   4 -10   16.11    0.81 
  -3   4 -10   16.34    0.76 
  -3   4 -10   16.37    0.85 
   3  -4  10   15.58    0.86 
   3  -4  10   17.04    0.76 
   3  -4  10   16.24    0.92 
   3  -4  10   16.54    0.76 
   3   4  10   16.04    0.86 
  -3  -4 -11    0.85    0.37 
  -3   4 -11    0.72    0.37 
  -3   4 -11    0.61    0.40 
  -3   4 -11    1.02    0.40 
  -3   4 -11    1.44    0.39 
  -3   4 -11    0.60    0.36 
   3  -4  11    1.00    0.44 
   3  -4  11    0.98    0.37 
   3  -4  11    0.82    0.45 
   3   4  11    0.98    0.38 
   3   4  11    0.77    0.41 
  -3  -4 -12    0.86    0.36 
  -3   4 -12    0.63    0.38 
  -3   4 -12    0.41    0.40 
  -3   4 -12    0.78    0.43 
  -3   4 -12    0.44    0.36 
  -3   4 -12    0.72    0.41 
   3  -4  12    0.49    0.43 
   3  -4  12    0.75    0.46 
   3   4  12    0.33    0.41 
  -3  -4 -13    1.65    0.48 
  -3  -4 -13    1.67    0.42 
  -3   4 -13    2.10    0.44 
  -3   4 -13    1.58    0.45 
  -3   4 -13    2.20    0.46 
  -3   4 -13    2.11    0.51 
   3  -4  13    1.74    0.49 
   3  -4  13    1.58    0.55 
   3   4  13    2.02    0.51 
  -3  -4 -14    1.88    0.52 
  -3  -4 -14    1.36    0.43 
  -3   4 -14    0.95    0.38 
  -3   4 -14    1.72    0.49 
  -3   4 -14    1.62    0.46 
  -3   4 -14    0.87    0.45 
   3  -4  14    1.56    0.50 
   3  -4  14    1.49    0.55 
   3   4  14    1.71    0.52 
  -3  -4 -15    5.45    0.67 
  -3  -4 -15    6.27    0.72 
  -3   4 -15    5.08    0.63 
  -3   4 -15    5.97    0.72 
  -3   4 -15    5.22    0.63 
  -3   4 -15    4.43    0.62 
   3  -4  15    5.35    0.66 
   3  -4  15    5.99    0.78 
   3  -4  15    5.01    0.68 
   3   4  15    4.90    0.66 
  -3  -4 -16    2.44    0.54 
  -3  -4 -16    2.60    0.52 
  -3   4 -16    3.09    0.54 
  -3   4 -16    3.62    0.63 
  -3   4 -16    2.62    0.55 
  -3   4 -16    3.33    0.59 
   3  -4  16    3.27    0.62 
   3  -4  16    3.65    0.68 
   3  -4  16    3.35    0.62 
   3   4  16    3.00    0.62 
  -3  -4 -17    5.73    0.74 
  -3  -4 -17    6.36    0.73 
  -3   4 -17    4.46    0.64 
  -3   4 -17    5.39    0.70 
  -3   4 -17    6.46    0.77 
  -3   4 -17    5.97    0.74 
   3  -4  17    6.36    0.76 
   3  -4  17    4.39    0.72 
   3  -4  17    5.65    0.74 
   3   4  17    5.62    0.77 
  -3  -4 -18    2.44    0.62 
  -3  -4 -18    1.91    0.49 
  -3   4 -18    2.11    0.57 
  -3   4 -18    2.10    0.56 
  -3   4 -18    1.92    0.57 
   3  -4  18    2.65    0.61 
   3  -4  18    2.33    0.67 
   3  -4  18    1.79    0.61 
   3   4  18    1.97    0.62 
  -3  -5  18    1.28    0.57 
  -3  -5  18    1.99    0.60 
  -3  -5  18    1.96    0.66 
  -3   5  18    1.77    0.53 
   3  -5 -18    1.39    0.56 
   3  -5 -18    1.83    0.55 
   3  -5 -18    1.47    0.50 
   3   5 -18    2.54    0.65 
   3   5 -18    1.92    0.57 
   3   5 -18    1.39    0.53 
  -3  -5  17    0.20    0.47 
  -3  -5  17   -0.32    0.47 
  -3  -5  17   -0.09    0.48 
  -3   5  17    0.34    0.42 
  -3   5  17    0.37    0.40 
   3  -5 -17    0.22    0.50 
   3  -5 -17    0.33    0.46 
   3  -5 -17   -0.62    0.38 
   3   5 -17   -0.46    0.47 
   3   5 -17   -0.32    0.42 
   3   5 -17    0.07    0.46 
  -3  -5  16    1.64    0.56 
  -3  -5  16    2.15    0.59 
  -3  -5  16    1.50    0.55 
  -3   5  16    1.35    0.43 
  -3   5  16    1.97    0.48 
   3  -5 -16    1.05    0.51 
   3  -5 -16    1.80    0.53 
   3  -5 -16    1.56    0.51 
   3   5 -16    2.17    0.57 
   3   5 -16    1.75    0.52 
   3   5 -16    1.17    0.50 
  -3  -5  15    6.02    0.72 
  -3  -5  15    6.49    0.80 
  -3  -5  15    4.74    0.66 
  -3   5  15    4.86    0.63 
  -3   5  15    5.61    0.69 
   3  -5 -15    6.08    0.76 
   3  -5 -15    6.06    0.73 
   3  -5 -15    4.61    0.63 
   3   5 -15    4.81    0.68 
   3   5 -15    6.11    0.73 
   3   5 -15    6.23    0.75 
  -3  -5  14   27.93    1.20 
  -3  -5  14   29.62    1.15 
  -3  -5  14   29.62    1.21 
  -3   5  14   25.83    1.07 
  -3   5  14   29.98    1.08 
   3  -5 -14   30.37    1.24 
   3  -5 -14   29.68    1.16 
   3  -5 -14   26.90    1.10 
   3   5 -14   29.28    1.20 
   3   5 -14   27.18    1.15 
   3   5 -14   29.09    1.20 
  -3  -5  13    7.76    0.81 
  -3  -5  13    8.43    0.76 
  -3  -5  13    8.22    0.81 
  -3   5  13    6.67    0.64 
  -3   5  13    7.13    0.66 
   3  -5 -13    8.54    0.83 
   3  -5 -13    7.63    0.73 
   3  -5 -13    7.10    0.70 
   3   5 -13    8.76    0.81 
   3   5 -13    7.88    0.80 
   3   5 -13    7.99    0.80 
  -3  -5  12    1.54    0.48 
  -3  -5  12    1.50    0.45 
  -3  -5  12    1.98    0.50 
  -3   5  12    1.88    0.43 
  -3   5  12    1.71    0.42 
   3  -5 -12    1.77    0.50 
   3  -5 -12    2.00    0.47 
   3  -5 -12    2.08    0.49 
   3   5 -12    1.21    0.45 
   3   5 -12    1.63    0.47 
   3   5 -12    2.11    0.53 
  -3  -5  11    3.57    0.57 
  -3  -5  11    3.97    0.52 
  -3   5  11    3.36    0.50 
  -3   5  11    2.67    0.46 
   3  -5 -11    4.15    0.61 
   3  -5 -11    4.13    0.57 
   3   5 -11    3.19    0.53 
   3   5 -11    4.45    0.59 
   3   5 -11    3.45    0.53 
  -3  -5  10    2.78    0.52 
  -3  -5  10    2.97    0.49 
  -3   5  10    2.05    0.44 
  -3   5  10    2.55    0.46 
   3  -5 -10    2.87    0.56 
   3  -5 -10    3.10    0.50 
   3   5 -10    2.65    0.49 
   3   5 -10    3.31    0.52 
   3   5 -10    3.28    0.57 
  -3  -5   9    2.39    0.48 
  -3  -5   9    2.77    0.47 
  -3   5   9    2.62    0.45 
  -3   5   9    2.60    0.45 
   3  -5  -9    3.23    0.55 
   3  -5  -9    2.67    0.46 
   3   5  -9    2.69    0.50 
   3   5  -9    2.82    0.51 
   3   5  -9    2.98    0.53 
  -3  -5   8    0.10    0.36 
  -3  -5   8    0.70    0.35 
  -3   5   8    0.13    0.27 
  -3   5   8    0.49    0.35 
   3  -5  -8    0.34    0.39 
   3  -5  -8    0.53    0.34 
   3   5  -8    0.68    0.39 
   3   5  -8    0.47    0.38 
   3   5  -8   -0.14    0.37 
  -3  -5   7    0.49    0.37 
  -3  -5   7    0.40    0.32 
  -3   5   7    0.25    0.27 
  -3   5   7    0.39    0.34 
   3  -5  -7    0.55    0.39 
   3  -5  -7    0.31    0.33 
   3   5  -7    0.38    0.36 
   3   5  -7    0.24    0.35 
   3   5  -7    0.30    0.33 
  -3  -5   6    1.69    0.40 
  -3  -5   6    1.69    0.38 
  -3   5   6    1.34    0.34 
  -3   5   6    1.42    0.40 
   3  -5  -6    1.98    0.47 
   3  -5  -6    1.50    0.43 
   3  -5  -6    1.55    0.36 
   3   5  -6    1.45    0.41 
   3   5  -6    1.76    0.43 
   3   5  -6    1.57    0.42 
  -3  -5   5    7.56    0.62 
  -3  -5   5    7.87    0.55 
  -3   5   5    6.97    0.56 
  -3   5   5    6.84    0.62 
   3  -5  -5    7.95    0.71 
   3  -5  -5    8.43    0.68 
   3  -5  -5    7.33    0.56 
   3   5  -5    6.29    0.63 
   3   5  -5    7.10    0.65 
   3   5  -5    6.65    0.62 
  -3  -5   4   16.77    0.79 
  -3  -5   4   18.71    0.72 
  -3   5   4   16.85    0.73 
  -3   5   4   17.07    0.81 
   3  -5  -4   17.91    0.89 
   3  -5  -4   17.69    0.81 
   3   5  -4   16.11    0.75 
   3   5  -4   17.40    0.80 
   3   5  -4   17.42    0.82 
  -3  -5   3    0.35    0.30 
  -3   5   3    0.75    0.34 
  -3   5   3    0.65    0.36 
   3  -5  -3    0.29    0.36 
   3  -5  -3    0.75    0.36 
   3   5  -3    0.42    0.33 
  -3  -5   2    3.89    0.45 
  -3   5   2    3.96    0.48 
  -3   5   2    3.40    0.50 
   3  -5  -2    3.13    0.49 
   3  -5  -2    3.29    0.46 
   3   5  -2    3.61    0.46 
  -3  -5   1    8.44    0.59 
  -3   5   1    7.92    0.66 
  -3   5   1    8.30    0.67 
   3  -5  -1    8.77    0.69 
   3  -5  -1    8.64    0.60 
   3   5  -1    8.22    0.60 
  -3  -5   0    1.28    0.33 
  -3   5   0    1.25    0.38 
  -3   5   0    1.46    0.42 
   3  -5   0    1.29    0.41 
   3  -5   0    1.05    0.34 
   3   5   0    0.89    0.33 
  -3  -5  -1    1.20    0.31 
  -3   5  -1    1.09    0.38 
  -3   5  -1    0.83    0.39 
  -3   5  -1    0.86    0.36 
   3  -5   1    0.73    0.38 
   3  -5   1    1.14    0.33 
   3   5   1    0.83    0.32 
  -3  -5  -2    0.23    0.27 
  -3   5  -2    0.44    0.36 
  -3   5  -2    0.50    0.36 
  -3   5  -2    0.61    0.36 
   3  -5   2    0.50    0.35 
   3  -5   2    0.76    0.37 
  -3   5  -3    6.51    0.69 
  -3   5  -3    5.47    0.65 
  -3   5  -3    5.63    0.62 
   3  -5   3    5.46    0.62 
   3  -5   3    6.17    0.62 
   3   5   3    4.50    0.52 
  -3   5  -4    7.90    0.72 
  -3   5  -4    8.18    0.72 
  -3   5  -4    7.04    0.66 
   3  -5   4    7.94    0.67 
   3  -5   4    7.70    0.65 
   3   5   4    7.37    0.58 
  -3   5  -5    1.65    0.44 
  -3   5  -5    1.57    0.41 
  -3   5  -5    2.32    0.45 
   3  -5   5    2.06    0.42 
   3  -5   5    2.27    0.42 
   3   5   5    2.11    0.41 
  -3   5  -6   10.56    0.69 
  -3   5  -6   11.28    0.81 
  -3   5  -6   11.52    0.81 
  -3   5  -6   11.14    0.77 
   3  -5   6   12.04    0.73 
   3  -5   6   12.01    0.85 
   3  -5   6   12.91    0.76 
   3   5   6   10.94    0.70 
  -3  -5  -7    7.54    0.62 
  -3   5  -7    6.59    0.58 
  -3   5  -7    7.45    0.75 
  -3   5  -7    8.31    0.75 
  -3   5  -7    6.84    0.65 
   3  -5   7    7.56    0.66 
   3  -5   7    7.57    0.78 
   3  -5   7    8.45    0.68 
   3   5   7    5.73    0.59 
   3   5   7    6.24    0.61 
  -3  -5  -8   12.20    0.72 
  -3   5  -8   12.02    0.76 
  -3   5  -8   11.92    0.85 
  -3   5  -8   11.84    0.85 
  -3   5  -8   10.73    0.80 
   3  -5   8   12.95    0.76 
   3  -5   8   12.23    0.89 
   3  -5   8   12.39    0.77 
   3   5   8   10.93    0.70 
  -3  -5  -9   -0.01    0.32 
  -3   5  -9    0.37    0.36 
  -3   5  -9    0.11    0.40 
  -3   5  -9    0.22    0.42 
  -3   5  -9    0.09    0.39 
   3  -5   9    0.03    0.42 
   3  -5   9    0.19    0.34 
   3  -5   9    0.64    0.48 
   3  -5   9    0.40    0.44 
   3   5   9   -0.16    0.33 
  -3  -5 -10    5.32    0.60 
  -3   5 -10    4.69    0.60 
  -3   5 -10    4.47    0.64 
  -3   5 -10    5.04    0.63 
  -3   5 -10    6.00    0.73 
   3  -5  10    5.00    0.65 
   3  -5  10    6.51    0.74 
   3   5  10    4.43    0.57 
  -3  -5 -11    1.08    0.40 
  -3   5 -11    0.38    0.39 
  -3   5 -11    0.63    0.46 
  -3   5 -11    0.59    0.43 
   3  -5  11    0.44    0.46 
   3  -5  11    0.64    0.53 
   3   5  11   -0.09    0.35 
   3   5  11    0.46    0.45 
  -3  -5 -12    6.41    0.68 
  -3   5 -12    5.31    0.66 
  -3   5 -12    6.16    0.74 
  -3   5 -12    5.79    0.67 
  -3   5 -12    5.39    0.71 
   3  -5  12    5.38    0.70 
   3  -5  12    5.64    0.75 
   3   5  12    5.21    0.64 
   3   5  12    5.81    0.70 
  -3  -5 -13    0.20    0.45 
  -3  -5 -13   -0.11    0.35 
  -3   5 -13    0.03    0.38 
  -3   5 -13    0.44    0.48 
  -3   5 -13   -0.03    0.38 
  -3   5 -13    0.09    0.43 
   3  -5  13   -0.02    0.45 
   3  -5  13    0.31    0.53 
   3   5  13   -0.16    0.45 
  -3  -5 -14    2.24    0.58 
  -3  -5 -14    2.52    0.50 
  -3   5 -14    2.41    0.56 
  -3   5 -14    2.39    0.61 
  -3   5 -14    2.53    0.53 
  -3   5 -14    1.81    0.57 
   3  -5  14    2.16    0.60 
   3  -5  14    2.77    0.67 
   3   5  14    1.93    0.58 
  -3  -5 -15    8.67    0.88 
  -3  -5 -15    9.62    0.79 
  -3   5 -15    8.93    0.82 
  -3   5 -15    9.67    0.95 
  -3   5 -15    8.49    0.82 
  -3   5 -15    8.70    0.90 
   3  -5  15    8.33    0.98 
   3  -5  15    9.51    1.05 
   3   5  15    8.84    0.95 
  -3  -6  14    1.71    0.58 
  -3  -6  14    2.16    0.57 
  -3  -6  14    1.73    0.59 
  -3   6  14    2.00    0.52 
   3  -6 -14    2.25    0.62 
   3  -6 -14    2.34    0.58 
   3  -6 -14    1.47    0.55 
   3   6 -14    2.23    0.61 
   3   6 -14    1.85    0.59 
   3   6 -14    1.79    0.59 
  -3  -6  13   26.91    1.29 
  -3  -6  13   26.43    1.21 
  -3  -6  13   25.19    1.22 
  -3   6  13   22.38    1.10 
  -3   6  13   24.71    1.06 
   3  -6 -13   25.47    1.26 
   3  -6 -13   24.89    1.17 
   3  -6 -13   22.59    1.10 
   3   6 -13   23.93    1.23 
   3   6 -13   26.01    1.21 
   3   6 -13   23.60    1.20 
  -3  -6  12    2.25    0.58 
  -3  -6  12    2.29    0.53 
  -3  -6  12    2.54    0.60 
  -3   6  12    1.45    0.48 
  -3   6  12    2.01    0.50 
   3  -6 -12    1.91    0.59 
   3  -6 -12    2.14    0.53 
   3  -6 -12    1.67    0.52 
   3   6 -12    2.18    0.57 
   3   6 -12    2.78    0.57 
   3   6 -12    1.25    0.51 
  -3  -6  11   -0.03    0.45 
  -3  -6  11    0.25    0.42 
  -3   6  11    0.69    0.44 
  -3   6  11    0.57    0.41 
   3  -6 -11    0.52    0.51 
   3  -6 -11    0.73    0.45 
   3  -6 -11    0.43    0.43 
   3   6 -11    0.56    0.48 
   3   6 -11    0.01    0.43 
   3   6 -11    0.30    0.47 
  -3  -6  10    0.90    0.47 
  -3  -6  10    0.91    0.45 
  -3   6  10    0.48    0.38 
  -3   6  10    0.84    0.41 
   3  -6 -10    0.57    0.50 
   3  -6 -10    0.67    0.42 
   3  -6 -10    0.45    0.42 
   3   6 -10    0.88    0.47 
   3   6 -10    0.74    0.46 
   3   6 -10    0.57    0.47 
  -3  -6   9    0.34    0.42 
  -3  -6   9    0.13    0.39 
  -3   6   9    0.16    0.39 
  -3   6   9   -0.03    0.38 
   3  -6  -9    0.12    0.44 
   3  -6  -9   -0.12    0.46 
   3  -6  -9    0.34    0.41 
   3  -6  -9   -0.20    0.38 
   3   6  -9    0.21    0.43 
   3   6  -9    0.26    0.42 
   3   6  -9   -0.13    0.41 
  -3  -6   8    0.23    0.39 
  -3  -6   8    0.19    0.38 
  -3   6   8    0.44    0.35 
  -3   6   8    0.35    0.39 
   3  -6  -8    0.36    0.47 
   3  -6  -8    0.43    0.42 
   3  -6  -8    0.27    0.39 
   3   6  -8    0.49    0.43 
   3   6  -8    0.18    0.42 
   3   6  -8    0.02    0.41 
  -3  -6   7   -0.13    0.37 
  -3  -6   7   -0.07    0.34 
  -3   6   7   -0.30    0.36 
   3  -6  -7    0.02    0.45 
   3  -6  -7    0.16    0.43 
   3  -6  -7   -0.12    0.34 
   3   6  -7    0.16    0.39 
   3   6  -7   -0.44    0.35 
   3   6  -7    0.09    0.39 
  -3  -6   6    0.25    0.37 
  -3  -6   6    0.20    0.35 
  -3   6   6    0.25    0.39 
   3  -6  -6    0.15    0.43 
   3  -6  -6   -0.18    0.40 
   3   6  -6   -0.29    0.36 
   3   6  -6    0.24    0.39 
   3   6  -6    0.48    0.41 
  -3  -6   5    4.16    0.56 
  -3   6   5    4.25    0.79 
  -3   6   5    3.80    0.55 
   3  -6  -5    3.81    0.63 
   3  -6  -5    3.50    0.56 
   3   6  -5    3.90    0.56 
   3   6  -5    3.26    0.53 
  -3  -6   4    1.71    0.43 
  -3   6   4    1.66    0.43 
  -3   6   4    1.93    0.47 
   3  -6  -4    1.06    0.47 
   3  -6  -4    1.46    0.47 
   3   6  -4    1.49    0.45 
   3   6  -4    1.25    0.43 
  -3  -6   3    0.19    0.33 
  -3  -6   3    0.05    0.32 
  -3   6   3   -0.01    0.36 
  -3   6   3   -0.25    0.38 
   3  -6  -3    0.08    0.42 
   3  -6  -3    0.31    0.39 
   3   6  -3    0.24    0.37 
   3   6  -3   -0.36    0.34 
  -3  -6   2   36.71    1.10 
  -3  -6   2   38.43    1.12 
  -3   6   2   36.71    1.15 
  -3   6   2   38.54    1.25 
   3  -6  -2   38.44    1.29 
   3  -6  -2   37.95    1.17 
   3   6  -2   36.19    1.10 
   3   6  -2   35.86    1.11 
   3   6  -2   34.33    1.56 
  -3  -6   1    4.62    0.53 
  -3   6   1    4.31    0.57 
  -3   6   1    4.69    0.62 
  -3   6   1    5.11    0.58 
   3  -6  -1    4.61    0.61 
   3  -6  -1    4.61    0.55 
   3   6  -1    4.89    0.56 
   3   6  -1    3.73    0.49 
  -3  -6   0   24.44    1.17 
  -3   6   0   24.63    1.04 
  -3   6   0   24.88    1.08 
  -3   6   0   23.67    0.99 
   3  -6   0   24.04    1.06 
   3  -6   0   24.91    0.95 
   3   6   0   23.29    0.93 
   3   6   0   22.41    0.90 
  -3   6  -1    0.98    0.45 
  -3   6  -1    0.21    0.41 
  -3   6  -1    0.35    0.38 
   3  -6   1    0.27    0.40 
   3  -6   1    0.76    0.44 
   3   6   1    0.40    0.34 
   3   6   1    0.65    0.37 
  -3   6  -2   12.02    0.84 
  -3   6  -2   11.57    0.87 
  -3   6  -2   11.16    0.80 
   3  -6   2   12.51    0.83 
   3  -6   2   13.53    0.90 
   3   6   2    9.98    0.69 
   3   6   2   10.63    0.70 
  -3   6  -3   11.44    0.85 
  -3   6  -3   10.83    0.87 
  -3   6  -3   11.39    0.82 
   3  -6   3   11.56    0.83 
   3  -6   3   11.67    0.82 
   3   6   3   10.87    0.70 
   3   6   3   10.05    0.70 
  -3   6  -4   -0.07    0.41 
  -3   6  -4   -0.33    0.41 
  -3   6  -4   -0.04    0.40 
   3  -6   4    0.42    0.40 
   3  -6   4   -0.32    0.39 
   3   6   4    0.24    0.36 
   3   6   4   -0.16    0.35 
  -3   6  -5    5.62    0.67 
  -3   6  -5    7.85    0.82 
  -3   6  -5    7.27    0.78 
   3  -6   5    7.22    0.74 
   3  -6   5    7.10    0.72 
   3   6   5    6.44    0.62 
  -3   6  -6   41.18    1.38 
  -3   6  -6   42.26    1.41 
  -3   6  -6   42.94    1.38 
   3  -6   6   44.20    1.27 
   3  -6   6   44.86    1.46 
   3  -6   6   45.72    1.29 
   3   6   6   39.94    1.22 
  -3   6  -7    2.69    0.58 
  -3   6  -7    2.98    0.62 
  -3   6  -7    2.99    0.60 
   3  -6   7    2.46    0.58 
   3  -6   7    3.30    0.53 
   3  -6   7    2.99    0.57 
   3  -6   7    3.21    0.54 
   3   6   7    2.33    0.49 
  -3   6  -8    7.46    0.87 
  -3   6  -8    7.30    0.81 
   3  -6   8    7.80    0.88 
   3  -6   8    7.37    0.82 
   3   6   8    7.46    0.73 
  -3   6  -9    8.02    0.77 
  -3   6  -9    8.58    0.90 
  -3   6  -9    7.89    0.87 
   3  -6   9    7.73    0.89 
   3  -6   9    8.40    0.94 
   3   6   9    6.37    0.73 
  -3   6 -10    1.22    0.49 
  -3   6 -10    1.57    0.56 
  -3   6 -10    0.68    0.51 
   3  -6  10    0.98    0.55 
   3  -6  10    0.94    0.58 
   3   6  10    1.27    0.47 
  -3   6 -11    0.42    0.45 
  -3   6 -11    0.23    0.51 
  -3   6 -11    0.36    0.49 
   3  -6  11    0.88    0.53 
   3  -6  11    1.02    0.61 
   3   6  11    0.37    0.45 
  -3  -7   6    1.15    0.48 
  -3  -7   6    1.97    0.51 
   3  -7  -6    1.47    0.61 
   3   7  -6    1.06    0.50 
  -3  -7   5    1.48    0.48 
  -3  -7   5    2.66    0.54 
  -3   7   5    1.77    0.55 
   3  -7  -5    1.96    0.61 
   3  -7  -5    1.80    0.57 
   3   7  -5    1.27    0.51 
   3   7  -5    1.38    0.52 
  -3  -7   4    1.99    0.49 
  -3   7   4    2.15    0.56 
   3  -7  -4    2.53    0.65 
   3  -7  -4    2.51    0.59 
   3   7  -4    1.29    0.49 
   3   7  -4    1.78    0.53 
  -3  -7   3    1.27    0.64 
  -3   7   3    1.26    0.50 
   3  -7  -3    1.03    0.59 
   3  -7  -3    1.36    0.52 
   3   7  -3    1.11    0.47 
   3   7  -3    1.51    0.51 
  -3   7   2    3.84    0.62 
  -3   7   2    3.78    0.64 
   3  -7  -2    3.81    0.69 
   3  -7  -2    3.92    0.62 
   3   7  -2    4.44    0.69 
  -3  -7   1   20.19    1.00 
  -3   7   1   17.95    1.03 
  -3   7   1   18.74    1.08 
   3  -7  -1   18.72    1.10 
  -3  -7   0    0.59    0.45 
  -3   7   0    0.31    0.47 
  -3   7   0    0.65    0.50 
  -3   7   0    0.38    0.44 
   3  -7   0    0.49    0.48 
   3  -7   0    0.64    0.53 
  -3  -7  -1   21.66    1.09 
  -3   7  -1   20.48    1.09 
  -3   7  -1   21.63    1.15 
  -3   7  -1   21.11    1.08 
   3  -7   1   21.98    1.15 
   3  -7   1   22.19    1.19 
   3   7   1   17.09    0.94 
  -3   7  -2    2.45    0.61 
  -3   7  -2    2.85    0.58 
   3  -7   2    3.42    0.63 
   3  -7   2    3.26    0.64 
   3   7   2    2.34    0.52 
  -3   7  -3    0.60    0.51 
  -3   7  -3    0.52    0.48 
   3  -7   3    0.97    0.51 
   3  -7   3    0.66    0.49 
  -4   0  25    0.39    0.47 
   4   0 -25    0.02    0.41 
   4   0 -25    0.33    0.47 
  -4   0  24  135.97    2.37 
   4   0 -24  124.89    2.23 
   4   0 -24  133.21    2.24 
   4   0 -24  128.36    2.31 
  -4   0  23    0.22    0.43 
   4   0 -23    0.14    0.36 
   4   0 -23    0.18    0.37 
   4   0 -23    0.06    0.40 
  -4   0  22    0.95    0.62 
  -4   0  22    1.10    0.48 
   4   0 -22    0.83    0.39 
   4   0 -22    1.53    0.42 
   4   0 -22    1.05    0.43 
  -4   0  21    0.00    0.31 
  -4   0  21    0.18    0.40 
   4   0 -21    0.36    0.35 
   4   0 -21    0.07    0.34 
   4   0 -21    0.01    0.31 
  -4   0  20  118.37    1.74 
  -4   0  20  118.06    1.95 
   4   0 -20  116.13    1.86 
   4   0 -20  116.04    1.89 
  -4   0  19    0.19    0.31 
  -4   0  19    0.12    0.35 
   4   0 -19    0.11    0.32 
   4   0 -19   -0.22    0.31 
  -4   0  18    0.24    0.29 
  -4   0  18    0.03    0.35 
   4   0 -18    0.23    0.28 
   4   0 -18    0.16    0.31 
  -4   0  17    0.27    0.29 
  -4   0  17    0.04    0.32 
   4   0 -17    0.22    0.27 
   4   0 -17    0.07    0.29 
  -4   0  16   89.29    1.37 
  -4   0  16   92.17    1.51 
   4   0 -16   91.86    1.43 
  -4   0  15    0.05    0.24 
  -4   0  15    0.09    0.29 
   4   0 -15    0.30    0.27 
  -4   0  14  138.13    1.57 
  -4   0  14  136.80    1.66 
  -4   0  13   -0.08    0.22 
  -4   0  13   -0.30    0.25 
  -4   0  12   16.79    0.60 
  -4   0  12   17.26    0.62 
  -4   0  11    0.00    0.20 
  -4   0  10    5.08    0.39 
  -4   0   9    0.06    0.20 
  -4   0   7   -0.14    0.19 
  -4   0   6   68.53    0.84 
  -4   0   5   -0.10    0.18 
  -4   0   4  586.99    3.71 
  -4   0   3   -0.18    0.17 
  -4   0   2  146.12    1.01 
  -4   0   1   -0.08    0.15 
   4   0  -1    0.06    0.17 
  -4   0   0  169.97    1.01 
   4   0   0  173.35    1.14 
   4   0   1    0.08    0.18 
   4   0   2    1.01    0.21 
  -4   0  -3   -0.08    0.14 
   4   0   3    0.16    0.20 
  -4   0  -4   33.51    0.53 
  -4   0  -5    0.06    0.13 
  -4   0  -6    2.36    0.25 
  -4   0  -7    0.06    0.15 
  -4   0  -8    5.36    0.31 
   4   0   8    5.32    0.30 
  -4   0  -9   -0.11    0.14 
   4   0   9    0.01    0.17 
   4   0   9    0.00    0.23 
  -4   0 -10    2.84    0.29 
   4   0  10    3.22    0.32 
   4   0  10    3.24    0.38 
  -4   0 -11   -0.05    0.17 
   4   0  11    0.18    0.19 
   4   0  11    0.06    0.24 
  -4   0 -12   11.89    0.45 
  -4   0 -12   12.65    0.66 
   4   0  12   12.95    0.48 
   4   0  12   11.42    0.64 
   4   0  12   11.85    0.64 
  -4   0 -13   -0.05    0.28 
   4   0  13    0.03    0.29 
   4   0  13    0.19    0.29 
  -4   0 -14    3.17    0.42 
  -4   0 -14    2.61    0.44 
   4   0  14    3.59    0.60 
   4   0  14    3.05    0.44 
  -4   0 -15   -0.10    0.30 
  -4   0 -15   -0.09    0.29 
   4   0  15    0.03    0.33 
  -4   0 -16   30.95    1.04 
  -4   0 -16   31.80    1.11 
   4   0  16   32.92    1.06 
  -4   0 -17   -0.23    0.33 
  -4   0 -17    0.10    0.33 
   4   0  17   -0.08    0.35 
  -4   0 -18    0.88    0.41 
  -4   0 -18    1.00    0.44 
   4   0  18    1.05    0.43 
  -4   0 -19    0.08    0.36 
  -4   0 -19   -0.14    0.38 
   4   0  19   -0.37    0.38 
  -4   0 -20    8.34    0.72 
  -4   0 -20    9.33    0.86 
   4   0  20    8.95    0.81 
  -4   0 -21    0.02    0.34 
  -4   0 -21   -0.02    0.45 
   4   0  21   -0.01    0.44 
  -4  -1  24   39.09    1.43 
  -4   1  24   38.88    1.35 
   4  -1 -24   38.60    1.34 
   4  -1 -24   39.49    1.33 
   4  -1 -24   36.66    1.21 
   4   1 -24   38.38    1.30 
   4   1 -24   38.34    1.25 
   4   1 -24   38.14    1.41 
  -4  -1  23    1.03    0.42 
  -4  -1  23    0.64    0.48 
  -4   1  23    0.76    0.43 
   4  -1 -23    0.54    0.43 
   4  -1 -23    1.15    0.45 
   4  -1 -23    1.45    0.42 
   4   1 -23    0.91    0.40 
   4   1 -23    0.56    0.38 
   4   1 -23    0.71    0.47 
  -4  -1  22    2.07    0.46 
  -4  -1  22    2.97    0.58 
  -4   1  22    2.24    0.50 
   4  -1 -22    1.52    0.45 
   4  -1 -22    1.90    0.46 
   4  -1 -22    2.31    0.45 
   4   1 -22    1.35    0.41 
   4   1 -22    1.93    0.44 
   4   1 -22    2.13    0.52 
  -4  -1  21    3.56    0.52 
  -4  -1  21    3.54    0.60 
  -4   1  21    3.55    0.54 
   4  -1 -21    2.72    0.48 
   4  -1 -21    3.81    0.53 
   4  -1 -21    3.43    0.49 
   4   1 -21    2.98    0.47 
   4   1 -21    3.31    0.48 
   4   1 -21    3.06    0.54 
  -4  -1  20    0.22    0.34 
  -4  -1  20    0.21    0.38 
  -4   1  20   -0.15    0.35 
   4  -1 -20    0.26    0.34 
   4  -1 -20   -0.03    0.32 
   4  -1 -20    0.14    0.29 
   4   1 -20   -0.01    0.29 
   4   1 -20   -0.11    0.30 
   4   1 -20   -0.05    0.37 
  -4  -1  19   36.76    1.09 
  -4  -1  19   37.97    1.19 
  -4   1  19   37.26    0.97 
  -4   1  19   35.89    1.10 
   4  -1 -19   37.70    0.97 
   4  -1 -19   35.80    1.10 
   4  -1 -19   37.77    1.07 
   4  -1 -19   35.21    1.02 
   4   1 -19   37.21    1.05 
   4   1 -19   37.46    1.04 
   4   1 -19   36.21    1.14 
  -4  -1  18    8.32    0.64 
  -4  -1  18    8.00    0.68 
  -4   1  18    7.57    0.56 
  -4   1  18    8.07    0.64 
   4  -1 -18    7.76    0.56 
   4  -1 -18    7.85    0.58 
   4  -1 -18    7.38    0.61 
   4   1 -18    7.49    0.57 
   4   1 -18    7.53    0.66 
  -4  -1  17   62.48    1.29 
  -4  -1  17   64.63    1.37 
  -4   1  17   62.77    1.14 
  -4   1  17   61.72    1.29 
   4  -1 -17   65.67    1.17 
   4  -1 -17   63.38    1.32 
   4  -1 -17   61.01    1.32 
   4   1 -17   63.72    1.23 
   4   1 -17   62.46    1.33 
  -4  -1  16   13.83    0.72 
  -4  -1  16   15.12    0.75 
  -4   1  16   14.34    0.63 
  -4   1  16   14.99    0.71 
   4  -1 -16   15.21    0.64 
   4  -1 -16   14.67    0.70 
   4   1 -16   15.16    0.65 
   4   1 -16   15.07    0.73 
  -4  -1  15   19.91    0.77 
  -4  -1  15   20.39    0.79 
  -4   1  15   20.48    0.68 
  -4   1  15   19.96    0.76 
   4  -1 -15   20.26    0.67 
   4  -1 -15   20.26    0.76 
  -4  -1  14   42.67    0.99 
  -4  -1  14   42.62    1.02 
  -4   1  14   41.43    0.87 
  -4   1  14   42.11    0.98 
   4  -1 -14   43.14    0.89 
   4  -1 -14   41.80    0.98 
  -4  -1  13   95.11    1.35 
  -4  -1  13   99.62    1.43 
  -4   1  13   93.43    1.21 
  -4   1  13   96.14    1.36 
   4  -1 -13   96.06    1.24 
  -4  -1  12    3.99    0.43 
  -4  -1  12    4.96    0.48 
  -4   1  12    4.43    0.39 
  -4   1  12    4.61    0.44 
   4  -1 -12    6.00    0.50 
  -4  -1  11   17.45    0.62 
  -4   1  11   17.41    0.56 
  -4  -1  10   49.78    0.91 
  -4   1  10   51.43    0.84 
  -4  -1   9   47.48    0.86 
  -4   1   9   47.16    0.79 
  -4  -1   8   11.94    0.50 
  -4   1   8   12.18    0.47 
  -4  -1   7   48.44    0.80 
  -4   1   7   47.92    0.76 
  -4  -1   6    3.31    0.35 
  -4   1   6    2.88    0.32 
   4  -1  -6    2.66    0.31 
  -4  -1   5  529.93    3.46 
  -4   1   5  508.33    2.98 
   4  -1  -5  525.89    2.69 
  -4  -1   4  123.93    1.06 
  -4   1   4  120.33    1.07 
   4  -1  -4  121.60    1.03 
  -4  -1   3    5.43    0.33 
  -4   1   3    5.11    0.34 
   4  -1  -3    4.95    0.33 
  -4  -1   2  256.86    1.33 
   4  -1  -2  258.07    1.48 
  -4  -1   1  146.50    0.95 
  -4   1   1  147.31    1.15 
   4  -1  -1  151.20    1.16 
  -4  -1   0   45.11    0.51 
  -4   1   0   44.32    0.68 
   4  -1   0   46.95    0.71 
  -4  -1  -1    7.05    0.25 
  -4   1  -1    6.84    0.36 
   4  -1   1    7.11    0.39 
  -4  -1  -2  218.03    0.87 
  -4   1  -2  212.46    1.45 
   4  -1   2  222.79    1.52 
   4  -1   3    8.79    0.42 
   4   1   3    8.43    0.21 
  -4   1  -4   15.45    0.47 
   4  -1   4   16.70    0.53 
  -4   1  -5   26.37    0.60 
   4  -1   5   28.66    0.67 
  -4   1  -6  299.98    1.90 
   4  -1   6  310.23    2.04 
  -4   1  -7    0.15    0.19 
   4  -1   7    0.11    0.21 
  -4  -1  -8   98.42    0.85 
  -4   1  -8   99.44    1.17 
   4  -1   8  103.58    1.29 
   4  -1   8  106.01    1.34 
  -4   1  -9   22.12    0.61 
   4  -1   9   24.10    0.75 
  -4   1 -10    1.72    0.28 
   4  -1  10    1.43    0.29 
   4  -1  10    1.69    0.35 
  -4   1 -11    3.64    0.40 
  -4   1 -11    3.90    0.42 
   4  -1  11    3.98    0.44 
   4  -1  11    4.10    0.47 
   4  -1  11    3.51    0.42 
   4   1  11    4.06    0.50 
  -4  -1 -12    0.25    0.28 
  -4   1 -12    0.26    0.25 
  -4   1 -12    0.28    0.25 
  -4   1 -12    0.12    0.28 
   4  -1  12    0.17    0.26 
   4  -1  12    0.37    0.35 
   4  -1  12    0.30    0.29 
   4  -1  12    0.32    0.31 
   4   1  12    0.36    0.33 
  -4  -1 -13    0.40    0.27 
  -4  -1 -13    0.08    0.28 
  -4   1 -13    0.13    0.25 
  -4   1 -13    0.30    0.27 
  -4   1 -13    0.65    0.34 
   4  -1  13    0.12    0.27 
   4  -1  13    0.23    0.34 
   4  -1  13    0.14    0.29 
   4  -1  13    0.15    0.30 
   4   1  13    0.24    0.34 
  -4  -1 -14    1.26    0.33 
  -4  -1 -14    0.78    0.36 
  -4   1 -14    1.25    0.35 
  -4   1 -14    1.12    0.33 
  -4   1 -14    0.78    0.36 
   4  -1  14    1.22    0.33 
   4  -1  14    1.01    0.39 
   4  -1  14    0.90    0.35 
   4  -1  14    0.96    0.36 
   4   1  14    1.01    0.39 
  -4  -1 -15    2.77    0.42 
  -4  -1 -15    2.66    0.45 
  -4   1 -15    2.66    0.41 
  -4   1 -15    2.98    0.43 
  -4   1 -15    2.86    0.46 
   4  -1  15    2.87    0.41 
   4  -1  15    2.50    0.45 
   4  -1  15    2.79    0.44 
   4  -1  15    3.38    0.48 
   4   1  15    3.20    0.50 
  -4  -1 -16    8.81    0.69 
  -4  -1 -16    8.70    0.64 
  -4  -1 -16    9.03    0.73 
  -4   1 -16    9.12    0.66 
  -4   1 -16    9.37    0.73 
   4  -1  16   10.16    0.79 
   4  -1  16    8.84    0.65 
   4  -1  16    9.82    0.70 
   4   1  16    9.05    0.74 
  -4  -1 -17    1.43    0.41 
  -4  -1 -17    2.26    0.42 
  -4  -1 -17    2.36    0.50 
  -4   1 -17    2.27    0.47 
  -4   1 -17    2.62    0.52 
   4  -1  17    2.62    0.53 
   4  -1  17    2.24    0.47 
   4  -1  17    2.37    0.47 
   4   1  17    2.76    0.52 
  -4  -1 -18    8.13    0.72 
  -4  -1 -18    7.71    0.64 
  -4  -1 -18    7.19    0.75 
  -4   1 -18    6.73    0.67 
  -4   1 -18    8.19    0.77 
   4  -1  18    8.54    0.74 
   4  -1  18    7.74    0.74 
   4   1  18    7.28    0.74 
  -4  -1 -19    2.38    0.51 
  -4  -1 -19    2.67    0.49 
  -4  -1 -19    3.25    0.59 
  -4   1 -19    2.95    0.55 
  -4   1 -19    3.31    0.58 
   4  -1  19    3.42    0.55 
   4   1  19    3.25    0.57 
  -4  -1 -20   11.73    0.87 
  -4  -1 -20   12.16    0.81 
  -4  -1 -20   13.85    0.97 
  -4   1 -20   12.69    0.87 
  -4   1 -20   12.54    0.95 
   4   1  20   13.51    0.98 
  -4  -1 -21    0.10    0.42 
  -4  -1 -21   -0.10    0.43 
  -4   1 -21    0.01    0.35 
  -4   1 -21    0.22    0.46 
   4   1  21    0.18    0.48 
  -4  -2  24    0.60    0.44 
  -4  -2  24    0.56    0.54 
  -4   2  24    0.52    0.46 
   4  -2 -24    0.85    0.49 
   4  -2 -24    0.35    0.42 
   4  -2 -24    0.15    0.39 
   4   2 -24    0.70    0.42 
   4   2 -24    0.63    0.52 
  -4  -2  23   -0.06    0.44 
  -4  -2  23   -0.23    0.49 
  -4   2  23    0.21    0.41 
   4  -2 -23    0.24    0.41 
   4  -2 -23   -0.21    0.36 
   4  -2 -23    0.00    0.37 
   4   2 -23    0.31    0.38 
   4   2 -23   -0.05    0.44 
  -4  -2  22    3.49    0.59 
  -4  -2  22    3.67    0.66 
  -4   2  22    4.40    0.60 
   4  -2 -22    3.77    0.56 
   4  -2 -22    3.30    0.57 
   4  -2 -22    3.67    0.54 
   4  -2 -22    2.91    0.51 
   4   2 -22    3.93    0.55 
   4   2 -22    4.27    0.66 
   4   2 -22    4.44    0.59 
  -4  -2  21    0.79    0.44 
  -4  -2  21    0.25    0.47 
  -4   2  21    0.75    0.40 
   4  -2 -21    1.02    0.42 
   4  -2 -21    0.38    0.38 
   4  -2 -21    0.76    0.39 
   4  -2 -21    0.93    0.39 
   4   2 -21    0.65    0.37 
   4   2 -21    0.50    0.41 
   4   2 -21    0.62    0.41 
  -4  -2  20    2.41    0.51 
  -4  -2  20    2.62    0.55 
  -4   2  20    2.82    0.51 
   4  -2 -20    3.11    0.50 
   4  -2 -20    1.93    0.48 
   4  -2 -20    2.94    0.47 
   4  -2 -20    2.53    0.47 
   4   2 -20    2.44    0.44 
   4   2 -20    2.65    0.44 
   4   2 -20    2.14    0.49 
   4   2 -20    2.90    0.50 
  -4  -2  19    1.50    0.45 
  -4  -2  19    1.39    0.47 
  -4   2  19    1.81    0.43 
   4  -2 -19    1.57    0.41 
   4  -2 -19    1.04    0.40 
   4  -2 -19    1.41    0.38 
   4  -2 -19    1.61    0.41 
   4   2 -19    1.10    0.35 
   4   2 -19    1.74    0.37 
   4   2 -19    1.29    0.43 
   4   2 -19    1.40    0.41 
  -4  -2  18    0.27    0.37 
  -4  -2  18    0.41    0.37 
  -4  -2  18    0.03    0.34 
  -4   2  18    0.11    0.32 
   4  -2 -18    0.44    0.34 
   4  -2 -18    0.23    0.33 
   4  -2 -18    0.53    0.32 
   4  -2 -18    0.67    0.35 
   4   2 -18    0.36    0.29 
   4   2 -18    0.95    0.40 
   4   2 -18    0.19    0.34 
  -4  -2  17    8.23    0.71 
  -4  -2  17    8.71    0.69 
  -4  -2  17    7.85    0.72 
  -4   2  17    8.37    0.53 
  -4   2  17    8.71    0.63 
   4  -2 -17    8.78    0.62 
   4  -2 -17    8.64    0.67 
   4  -2 -17    8.43    0.58 
   4   2 -17    9.01    0.58 
   4   2 -17    8.39    0.69 
   4   2 -17    9.20    0.65 
  -4  -2  16    4.11    0.52 
  -4  -2  16    3.97    0.48 
  -4  -2  16    4.34    0.54 
  -4   2  16    4.17    0.43 
  -4   2  16    4.05    0.47 
   4  -2 -16    4.22    0.51 
   4  -2 -16    3.65    0.48 
   4   2 -16    4.38    0.45 
   4   2 -16    4.21    0.51 
  -4  -2  15    0.23    0.31 
  -4  -2  15    0.41    0.33 
  -4  -2  15    0.63    0.37 
  -4   2  15    0.73    0.26 
  -4   2  15    0.37    0.30 
   4  -2 -15    0.46    0.31 
   4  -2 -15    0.46    0.31 
   4   2 -15    0.50    0.32 
  -4  -2  14    0.08    0.30 
  -4  -2  14   -0.10    0.29 
  -4  -2  14    0.00    0.32 
  -4   2  14   -0.01    0.21 
  -4   2  14    0.12    0.25 
   4  -2 -14    0.14    0.28 
   4  -2 -14    0.14    0.27 
   4   2 -14    0.02    0.30 
   4   2 -14    0.03    0.28 
  -4  -2  13    2.17    0.37 
  -4  -2  13    2.15    0.36 
  -4  -2  13    2.29    0.40 
  -4   2  13    1.97    0.29 
  -4   2  13    2.14    0.35 
   4  -2 -13    2.00    0.35 
   4  -2 -13    1.98    0.33 
   4   2 -13    2.81    0.41 
  -4  -2  12   11.26    0.61 
  -4  -2  12   12.17    0.58 
  -4  -2  12   11.91    0.60 
  -4   2  12   11.23    0.50 
  -4   2  12   11.82    0.58 
   4  -2 -12   11.87    0.59 
   4   2 -12   11.98    0.59 
  -4  -2  11    0.09    0.25 
  -4  -2  11    0.03    0.22 
  -4  -2  11    0.01    0.26 
  -4   2  11    0.18    0.20 
  -4   2  11   -0.01    0.21 
   4  -2 -11    0.04    0.24 
   4   2 -11    0.06    0.26 
  -4  -2  10   42.06    0.92 
  -4  -2  10   42.75    0.92 
  -4   2  10   40.66    0.78 
  -4   2  10   40.45    1.03 
   4  -2 -10   43.83    0.92 
   4   2 -10   42.43    0.91 
  -4  -2   9    2.08    0.33 
  -4   2   9    2.30    0.28 
   4  -2  -9    2.43    0.34 
  -4  -2   8   50.68    0.94 
  -4   2   8   51.07    0.84 
   4  -2  -8   51.77    0.93 
  -4  -2   7    5.95    0.42 
  -4   2   6   23.58    0.54 
   4  -2  -6   23.92    0.63 
  -4  -2   5    0.76    0.22 
  -4   2   5    0.70    0.19 
   4  -2  -5    0.65    0.23 
  -4  -2   4   44.14    0.75 
  -4   2   4   42.68    0.71 
   4  -2  -4   43.34    0.79 
  -4  -2   3   59.21    0.81 
  -4   2   3   56.39    0.82 
   4  -2  -3   58.79    0.89 
  -4  -2   2  337.43    1.75 
  -4   2   2  324.72    1.92 
   4  -2  -2  337.31    2.02 
  -4  -2   1   26.70    0.51 
  -4   2   1   25.83    0.62 
   4  -2  -1   26.43    0.64 
  -4  -2   0  177.62    1.12 
  -4   2   0  169.73    1.46 
   4  -2   0  178.59    1.49 
  -4  -2  -1   58.79    0.61 
   4  -2   1   58.84    0.90 
  -4  -2  -2  505.06    2.00 
  -4   2  -2  477.95    2.53 
   4  -2   2  510.24    2.54 
  -4  -2  -3    1.30    0.12 
  -4   2  -3    1.32    0.27 
   4  -2   3    1.32    0.27 
  -4   2  -4    2.09    0.30 
   4  -2   4    1.77    0.28 
  -4   2  -5    3.53    0.35 
   4  -2   5    3.82    0.39 
   4  -2   5    3.82    0.43 
  -4   2  -6  243.84    2.00 
   4  -2   6  256.62    1.97 
   4  -2   6  258.44    2.08 
  -4   2  -7   77.93    1.19 
   4  -2   7   83.20    1.18 
   4  -2   7   84.15    1.28 
  -4   2  -8    8.25    0.52 
  -4   2  -8    8.77    0.51 
   4  -2   8    8.30    0.53 
   4  -2   8    8.97    0.59 
  -4   2  -9   18.11    0.69 
  -4   2  -9   19.23    0.69 
   4  -2   9   20.29    0.69 
   4  -2   9   19.62    0.77 
   4   2   9   19.21    0.74 
  -4   2 -10  346.83    2.62 
  -4   2 -10  362.42    2.67 
   4  -2  10  366.70    2.60 
   4  -2  10  370.47    2.88 
   4   2  10  357.78    2.83 
  -4  -2 -11   29.45    0.92 
  -4   2 -11   28.63    0.87 
  -4   2 -11   30.05    0.88 
   4  -2  11   28.57    0.88 
   4  -2  11   29.90    0.86 
   4  -2  11   29.12    0.93 
   4   2  11   29.17    0.94 
  -4  -2 -12   35.53    1.03 
  -4   2 -12   33.47    1.50 
  -4   2 -12   34.63    0.95 
  -4   2 -12   34.28    0.97 
  -4   2 -12   33.79    0.98 
   4  -2  12   35.30    0.97 
   4  -2  12   34.53    1.07 
   4  -2  12   34.35    0.98 
   4  -2  12   36.42    0.98 
   4   2  12   35.17    1.04 
  -4  -2 -13    1.86    0.41 
  -4  -2 -13    1.69    0.41 
  -4   2 -13    1.45    0.36 
  -4   2 -13    1.89    0.37 
  -4   2 -13    1.60    0.38 
  -4   2 -13    1.44    0.38 
   4  -2  13    1.76    0.40 
   4  -2  13    1.46    0.46 
   4  -2  13    1.39    0.39 
   4  -2  13    1.83    0.38 
   4   2  13    1.52    0.40 
  -4  -2 -14    0.75    0.34 
  -4  -2 -14    0.77    0.36 
  -4   2 -14    1.24    0.35 
  -4   2 -14    0.88    0.35 
  -4   2 -14    0.83    0.34 
  -4   2 -14    0.78    0.36 
  -4   2 -14    1.14    0.35 
   4  -2  14    0.73    0.36 
   4  -2  14    0.38    0.41 
   4  -2  14    0.47    0.36 
   4  -2  14    0.65    0.35 
   4   2  14    0.76    0.39 
  -4  -2 -15    0.21    0.32 
  -4  -2 -15    0.21    0.35 
  -4   2 -15    0.05    0.27 
  -4   2 -15   -0.32    0.29 
  -4   2 -15    0.01    0.31 
  -4   2 -15    0.09    0.34 
   4  -2  15    0.13    0.35 
   4  -2  15   -0.12    0.39 
   4  -2  15    0.35    0.37 
   4  -2  15   -0.19    0.33 
   4   2  15    0.29    0.38 
  -4  -2 -16    5.78    0.62 
  -4  -2 -16    6.12    0.67 
  -4   2 -16    5.37    0.58 
  -4   2 -16    6.30    0.66 
  -4   2 -16    5.51    0.65 
  -4   2 -16    5.56    0.66 
   4  -2  16    5.33    0.57 
   4  -2  16    5.89    0.70 
   4  -2  16    6.15    0.73 
   4  -2  16    6.34    0.68 
   4   2  16    6.18    0.73 
  -4  -2 -17    8.17    0.70 
  -4  -2 -17    7.15    0.73 
  -4   2 -17    7.22    0.67 
  -4   2 -17    8.52    0.70 
  -4   2 -17    7.53    0.74 
  -4   2 -17    8.04    0.68 
   4  -2  17    7.67    0.72 
   4  -2  17    8.10    0.87 
   4  -2  17    8.43    0.77 
   4   2  17    8.87    0.86 
  -4  -2 -18    0.89    0.40 
  -4  -2 -18    1.03    0.45 
  -4   2 -18    0.85    0.38 
  -4   2 -18    0.82    0.42 
  -4   2 -18    1.17    0.47 
   4  -2  18    0.98    0.53 
   4  -2  18    0.54    0.45 
   4   2  18    0.61    0.48 
  -4  -2 -19    3.03    0.55 
  -4  -2 -19    3.69    0.62 
  -4   2 -19    3.94    0.61 
  -4   2 -19    3.65    0.57 
  -4   2 -19    3.46    0.61 
   4  -2  19    3.07    0.61 
   4  -2  19    3.71    0.61 
   4   2  19    3.64    0.63 
  -4  -2 -20    0.64    0.42 
  -4  -2 -20    0.27    0.42 
  -4   2 -20    0.00    0.38 
  -4   2 -20    0.22    0.45 
   4  -2  20    0.58    0.54 
   4  -2  20    0.96    0.52 
   4   2  20    0.53    0.50 
  -4  -3  22    0.44    0.48 
  -4  -3  22    0.32    0.52 
  -4   3  22    0.40    0.43 
   4  -3 -22    0.93    0.48 
   4  -3 -22    0.51    0.45 
   4  -3 -22    0.50    0.41 
   4   3 -22    0.22    0.37 
   4   3 -22   -0.09    0.45 
   4   3 -22    0.69    0.46 
  -4  -3  21    1.87    0.55 
  -4  -3  21    2.60    0.58 
  -4  -3  21    3.35    0.65 
  -4   3  21    2.40    0.51 
   4  -3 -21    2.11    0.53 
   4  -3 -21    2.37    0.54 
   4  -3 -21    1.95    0.50 
   4   3 -21    2.40    0.48 
   4   3 -21    2.00    0.54 
   4   3 -21    2.76    0.56 
  -4  -3  20   -0.20    0.41 
  -4  -3  20    0.04    0.43 
  -4  -3  20   -0.08    0.44 
  -4   3  20   -0.04    0.36 
   4  -3 -20   -0.01    0.40 
   4  -3 -20    0.07    0.41 
   4  -3 -20    0.18    0.37 
   4   3 -20    0.31    0.34 
   4   3 -20   -0.38    0.38 
   4   3 -20   -0.22    0.37 
  -4  -3  19    1.16    0.48 
  -4  -3  19    0.79    0.46 
  -4  -3  19    1.71    0.54 
  -4   3  19    1.42    0.43 
   4  -3 -19    0.89    0.44 
   4  -3 -19    0.89    0.42 
   4  -3 -19    1.27    0.42 
   4   3 -19    0.92    0.37 
   4   3 -19    0.63    0.42 
   4   3 -19    0.75    0.40 
  -4  -3  18    0.19    0.41 
  -4  -3  18    0.11    0.41 
  -4  -3  18   -0.14    0.41 
  -4   3  18   -0.08    0.33 
   4  -3 -18    0.17    0.37 
   4  -3 -18    0.02    0.37 
   4  -3 -18    0.42    0.38 
   4   3 -18   -0.10    0.30 
   4   3 -18    0.16    0.39 
   4   3 -18    0.47    0.40 
   4   3 -18    0.19    0.36 
  -4  -3  17   32.49    1.14 
  -4  -3  17   33.85    1.13 
  -4  -3  17   32.65    1.18 
  -4   3  17   30.38    1.03 
  -4   3  17   31.31    1.02 
   4  -3 -17   31.66    1.10 
   4  -3 -17   30.69    1.10 
   4  -3 -17   30.41    1.05 
   4   3 -17   32.11    1.15 
   4   3 -17   29.61    1.09 
   4   3 -17   31.62    1.09 
  -4  -3  16   27.30    1.04 
  -4  -3  16   29.05    1.02 
  -4  -3  16   30.93    1.11 
  -4   3  16   27.36    0.98 
  -4   3  16   28.63    0.98 
   4  -3 -16   29.10    1.03 
   4  -3 -16   29.00    1.00 
   4  -3 -16   28.10    0.99 
   4   3 -16   28.80    1.06 
   4   3 -16   30.02    1.07 
   4   3 -16   29.02    1.02 
  -4  -3  15    2.86    0.49 
  -4  -3  15    4.29    0.53 
  -4  -3  15    3.73    0.55 
  -4   3  15    3.07    0.44 
   4  -3 -15    3.44    0.49 
   4  -3 -15    3.82    0.50 
   4  -3 -15    3.22    0.46 
   4   3 -15    4.39    0.57 
   4   3 -15    3.77    0.53 
   4   3 -15    4.47    0.57 
  -4  -3  14    0.85    0.40 
  -4  -3  14    0.44    0.34 
  -4  -3  14    0.69    0.38 
  -4   3  14    0.47    0.31 
   4  -3 -14    0.40    0.34 
   4  -3 -14    0.30    0.32 
   4  -3 -14    0.47    0.34 
   4   3 -14    0.64    0.36 
   4   3 -14    0.48    0.34 
   4   3 -14    0.63    0.38 
  -4  -3  13   14.30    0.78 
  -4  -3  13   16.46    0.74 
  -4  -3  13   15.99    0.79 
  -4   3  13   15.19    0.69 
   4  -3 -13   15.43    0.76 
   4  -3 -13   15.11    0.73 
   4   3 -13   15.41    0.77 
   4   3 -13   14.97    0.75 
   4   3 -13   14.41    0.77 
  -4  -3  12    0.93    0.36 
  -4  -3  12    0.12    0.28 
  -4  -3  12    0.30    0.33 
  -4   3  12    0.76    0.29 
   4  -3 -12    0.56    0.31 
   4  -3 -12    0.53    0.31 
   4   3 -12    0.68    0.34 
   4   3 -12    0.50    0.33 
  -4  -3  11    1.38    0.34 
  -4  -3  11    1.53    0.33 
  -4  -3  11    2.17    0.40 
  -4   3  11    1.95    0.26 
  -4   3  11    1.97    0.35 
   4  -3 -11    1.97    0.39 
   4  -3 -11    1.76    0.35 
   4   3 -11    2.07    0.39 
  -4  -3  10    2.23    0.37 
  -4  -3  10    2.67    0.35 
  -4  -3  10    3.33    0.43 
  -4   3  10    2.52    0.31 
  -4   3  10    2.11    0.33 
   4  -3 -10    2.67    0.40 
   4   3 -10    2.35    0.39 
  -4  -3   9   12.24    0.63 
  -4  -3   9   12.80    0.54 
  -4  -3   9   12.51    0.61 
  -4   3   9   12.56    0.47 
  -4   3   9   12.19    0.58 
   4  -3  -9   12.37    0.63 
   4   3  -9   11.98    0.60 
  -4  -3   8    6.14    0.51 
  -4  -3   8    5.62    0.49 
  -4   3   8    5.34    0.36 
  -4   3   8    5.44    0.46 
   4  -3  -8    5.82    0.47 
   4   3  -8    6.19    0.48 
  -4  -3   7   25.76    0.77 
  -4  -3   7   26.84    0.48 
  -4   3   7   24.94    0.62 
  -4   3   7   26.23    0.75 
   4  -3  -7   27.05    0.79 
  -4  -3   6    7.49    0.51 
  -4   3   6    7.47    0.40 
  -4   3   6    7.34    0.45 
   4  -3  -6    8.33    0.53 
   4  -3  -6    7.43    0.50 
  -4  -3   5   50.81    0.95 
  -4   3   5   48.01    0.84 
  -4   3   5   48.04    0.95 
   4  -3  -5   49.46    0.98 
   4  -3  -5   51.96    0.98 
  -4  -3   4    9.11    0.48 
  -4   3   4    9.06    0.46 
  -4   3   4    9.20    0.60 
   4  -3  -4    8.54    0.52 
   4  -3  -4    9.13    0.50 
  -4  -3   3   50.24    0.86 
  -4   3   3   48.12    0.87 
   4  -3  -3   50.63    0.98 
   4  -3  -3   50.83    0.92 
  -4  -3   2   27.03    0.64 
  -4   3   2   26.51    0.70 
   4  -3  -2   27.58    0.75 
  -4  -3   1   29.99    0.63 
  -4   3   1   29.04    0.74 
  -4   3   1   29.64    0.92 
   4  -3  -1   30.00    0.77 
  -4  -3   0  119.52    1.13 
  -4   3   0  112.66    1.37 
  -4   3   0  115.88    1.46 
   4  -3   0  118.17    1.41 
  -4  -3  -1   31.62    0.59 
  -4   3  -1   29.48    0.78 
  -4   3  -1   30.17    0.77 
   4  -3   1   30.79    0.78 
  -4  -3  -2   46.52    0.64 
  -4   3  -2   44.56    0.95 
  -4   3  -2   44.88    0.94 
   4  -3   2   45.53    0.92 
  -4  -3  -3   13.34    0.36 
  -4   3  -3   11.81    0.58 
  -4   3  -3   12.44    0.59 
   4  -3   3   12.81    0.58 
  -4  -3  -4    0.24    0.13 
  -4   3  -4    0.20    0.24 
  -4   3  -4    0.22    0.26 
   4  -3   4    0.31    0.25 
  -4  -3  -5    8.59    0.29 
  -4   3  -5    8.59    0.55 
  -4   3  -5    8.71    0.56 
   4  -3   5    9.29    0.55 
   4  -3   5    8.79    0.59 
  -4   3  -6    2.63    0.39 
  -4   3  -6    3.41    0.42 
   4  -3   6    2.90    0.37 
   4  -3   6    2.18    0.37 
   4   3   6    2.18    0.37 
  -4   3  -7   21.87    0.80 
  -4   3  -7   21.58    0.78 
   4  -3   7   22.94    0.76 
   4  -3   7   22.09    0.80 
   4   3   7   21.73    0.79 
  -4   3  -8  105.99    1.60 
  -4   3  -8  109.62    1.60 
   4  -3   8  112.28    1.51 
   4  -3   8  114.00    1.70 
   4   3   8  110.11    1.64 
  -4  -3  -9   27.69    0.91 
  -4   3  -9   28.04    0.93 
  -4   3  -9   28.55    0.92 
   4  -3   9   31.15    0.89 
   4  -3   9   29.57    1.00 
   4  -3   9   30.71    1.12 
   4   3   9   28.21    0.91 
  -4  -3 -10  215.26    2.31 
  -4   3 -10  202.50    2.79 
  -4   3 -10  212.63    2.33 
  -4   3 -10  214.48    2.32 
  -4   3 -10  211.60    2.33 
   4  -3  10  221.27    2.15 
   4  -3  10  220.60    2.45 
   4  -3  10  224.11    2.19 
   4   3  10  212.55    2.38 
  -4  -3 -11  119.95    1.80 
  -4   3 -11  113.71    1.79 
  -4   3 -11  118.72    1.82 
  -4   3 -11  116.89    1.78 
  -4   3 -11  114.43    1.67 
  -4   3 -11  117.91    1.81 
   4  -3  11  116.53    1.78 
   4  -3  11  122.43    1.65 
   4  -3  11  123.15    1.92 
   4  -3  11  124.30    1.69 
   4   3  11  117.47    1.86 
   4   3  11  103.98    1.69 
  -4  -3 -12    4.44    0.53 
  -4   3 -12    4.25    0.51 
  -4   3 -12    4.30    0.54 
  -4   3 -12    4.46    0.54 
  -4   3 -12    5.02    0.58 
  -4   3 -12    3.55    0.48 
   4  -3  12    4.66    0.55 
   4  -3  12    5.10    0.57 
   4  -3  12    3.75    0.54 
   4  -3  12    5.21    0.59 
   4   3  12    4.49    0.54 
  -4  -3 -13    1.53    0.42 
  -4   3 -13    1.31    0.38 
  -4   3 -13    1.93    0.45 
  -4   3 -13    1.88    0.44 
  -4   3 -13    1.69    0.41 
  -4   3 -13    1.22    0.40 
   4  -3  13    1.67    0.45 
   4  -3  13    1.67    0.40 
   4  -3  13    1.57    0.51 
   4  -3  13    1.33    0.38 
   4   3  13    1.70    0.45 
  -4  -3 -14   16.72    0.88 
  -4  -3 -14   15.93    0.85 
  -4   3 -14   15.81    0.82 
  -4   3 -14   15.75    0.84 
  -4   3 -14   16.72    0.87 
  -4   3 -14   16.16    0.83 
  -4   3 -14   15.99    0.86 
   4  -3  14   16.79    0.87 
   4  -3  14   17.01    0.80 
   4  -3  14   17.86    1.00 
   4  -3  14   16.66    0.89 
   4  -3  14   16.88    0.84 
   4   3  14   15.43    0.91 
  -4  -3 -15   31.62    1.14 
  -4  -3 -15   32.82    1.15 
  -4   3 -15   29.62    1.10 
  -4   3 -15   33.35    1.14 
  -4   3 -15   29.38    1.09 
  -4   3 -15   31.80    1.15 
   4  -3  15   31.58    1.15 
   4  -3  15   32.90    1.27 
   4  -3  15   32.80    1.20 
   4   3  15   32.74    1.21 
  -4  -3 -16    6.22    0.70 
  -4  -3 -16    5.58    0.66 
  -4   3 -16    5.64    0.65 
  -4   3 -16    6.34    0.70 
  -4   3 -16    5.91    0.71 
  -4   3 -16    6.60    0.76 
   4  -3  16    5.82    0.65 
   4  -3  16    5.94    0.73 
   4  -3  16    6.11    0.76 
   4   3  16    6.08    0.72 
  -4  -3 -17    4.03    0.59 
  -4  -3 -17    4.59    0.62 
  -4   3 -17    4.55    0.61 
  -4   3 -17    5.22    0.63 
  -4   3 -17    4.50    0.62 
  -4   3 -17    4.43    0.61 
   4  -3  17    4.97    0.64 
   4  -3  17    4.46    0.71 
   4  -3  17    5.37    0.68 
   4   3  17    4.62    0.65 
  -4  -3 -18   25.36    1.15 
  -4  -3 -18   24.95    1.13 
  -4   3 -18   23.84    1.12 
  -4   3 -18   22.44    1.07 
  -4   3 -18   22.59    1.12 
  -4   3 -18   22.66    1.09 
   4  -3  18   24.30    1.12 
   4  -3  18   23.09    1.24 
   4  -3  18   23.68    1.16 
   4   3  18   22.27    1.16 
  -4  -3 -19    0.46    0.43 
  -4  -3 -19    1.11    0.47 
  -4   3 -19    0.85    0.47 
  -4   3 -19    1.16    0.49 
  -4   3 -19    1.73    0.54 
  -4   3 -19    1.47    0.49 
   4  -3  19    1.29    0.55 
   4  -3  19    0.98    0.55 
   4   3  19    1.48    0.57 
  -4  -4  21    0.31    0.52 
  -4  -4  21    1.09    0.55 
  -4  -4  20   11.54    1.01 
  -4  -4  20   12.66    1.02 
  -4  -4  20   11.73    1.01 
  -4   4  20   11.54    0.87 
   4  -4 -20   13.36    0.98 
   4  -4 -20   10.79    0.84 
   4  -4 -20   11.21    0.86 
   4   4 -20   12.16    0.98 
   4   4 -20   11.45    0.96 
   4   4 -20   11.22    0.96 
  -4  -4  19   23.95    1.20 
  -4  -4  19   22.58    1.11 
  -4  -4  19   23.51    1.21 
  -4   4  19   19.98    1.02 
  -4   4  19   22.49    1.03 
   4  -4 -19   23.37    1.14 
   4  -4 -19   21.87    1.10 
   4  -4 -19   20.47    1.04 
   4   4 -19   22.05    1.16 
   4   4 -19   21.45    1.12 
   4   4 -19   21.44    1.08 
  -4  -4  18    2.80    0.58 
  -4  -4  18    2.24    0.56 
  -4  -4  18    2.74    0.59 
  -4   4  18    2.62    0.55 
  -4   4  18    2.40    0.48 
   4  -4 -18    2.48    0.56 
   4  -4 -18    2.14    0.50 
   4  -4 -18    2.31    0.52 
   4   4 -18    2.58    0.59 
   4   4 -18    2.24    0.56 
   4   4 -18    2.68    0.55 
  -4  -4  17   11.62    0.91 
  -4  -4  17   10.61    0.87 
  -4  -4  17   11.43    0.92 
  -4   4  17    9.69    0.72 
  -4   4  17   11.20    0.79 
   4  -4 -17   10.47    0.86 
   4  -4 -17   10.54    0.82 
   4  -4 -17   10.91    0.78 
   4   4 -17   11.10    0.89 
   4   4 -17   10.92    0.87 
   4   4 -17   10.37    0.85 
  -4  -4  16   58.96    1.54 
  -4  -4  16   60.59    1.46 
  -4  -4  16   58.85    1.55 
  -4   4  16   54.77    1.45 
  -4   4  16   59.77    1.41 
   4  -4 -16   59.27    1.52 
   4  -4 -16   58.56    1.49 
   4  -4 -16   54.11    1.43 
   4   4 -16   59.49    1.55 
   4   4 -16   57.77    1.50 
   4   4 -16   58.44    1.51 
  -4  -4  15   65.40    1.59 
  -4  -4  15   67.63    1.48 
  -4  -4  15   67.43    1.58 
  -4   4  15   57.16    1.43 
  -4   4  15   64.87    1.43 
   4  -4 -15   66.00    1.53 
   4  -4 -15   66.11    1.53 
   4  -4 -15   62.10    1.48 
   4   4 -15   67.06    1.57 
   4   4 -15   64.65    1.53 
   4   4 -15   66.35    1.53 
  -4  -4  14   22.24    1.01 
  -4  -4  14   23.73    0.95 
  -4  -4  14   23.98    1.02 
  -4   4  14   19.30    0.88 
  -4   4  14   22.19    0.89 
   4  -4 -14   22.03    0.99 
   4  -4 -14   22.13    0.95 
   4  -4 -14   20.05    0.89 
   4   4 -14   22.55    0.99 
   4   4 -14   22.68    0.99 
   4   4 -14   20.80    0.92 
  -4  -4  13    4.39    0.55 
  -4  -4  13    5.14    0.56 
  -4  -4  13    5.46    0.61 
  -4   4  13    3.83    0.48 
  -4   4  13    5.19    0.57 
   4  -4 -13    5.21    0.62 
   4  -4 -13    5.44    0.61 
   4  -4 -13    4.96    0.56 
   4   4 -13    5.92    0.67 
   4   4 -13    5.45    0.66 
   4   4 -13    4.46    0.57 
  -4  -4  12    4.73    0.57 
  -4  -4  12    5.58    0.61 
  -4  -4  12    5.70    0.62 
  -4   4  12    4.86    0.59 
  -4   4  12    4.73    0.58 
   4  -4 -12    5.66    0.65 
   4  -4 -12    5.10    0.57 
   4  -4 -12    4.28    0.52 
   4   4 -12    5.14    0.63 
   4   4 -12    5.11    0.63 
   4   4 -12    5.05    0.58 
  -4  -4  11   18.78    0.87 
  -4  -4  11   18.37    0.76 
  -4  -4  11   19.45    0.86 
  -4   4  11   17.66    0.78 
   4  -4 -11   18.28    0.87 
   4  -4 -11   19.05    0.81 
   4  -4 -11   16.70    0.77 
   4   4 -11   18.52    0.84 
   4   4 -11   17.32    0.83 
   4   4 -11   17.73    0.85 
  -4  -4  10    0.00    0.33 
  -4  -4  10    0.39    0.28 
  -4  -4  10   -0.27    0.31 
  -4   4  10   -0.07    0.30 
   4  -4 -10    0.54    0.36 
   4  -4 -10   -0.06    0.30 
   4   4 -10    0.19    0.33 
   4   4 -10   -0.13    0.32 
   4   4 -10    0.07    0.32 
  -4  -4   9    1.27    0.37 
  -4  -4   9    1.13    0.31 
  -4   4   9    1.02    0.27 
  -4   4   9    1.16    0.35 
   4  -4  -9    0.78    0.33 
   4  -4  -9    1.17    0.33 
   4   4  -9    0.92    0.35 
   4   4  -9    0.67    0.33 
   4   4  -9    1.13    0.39 
  -4  -4   8    5.70    0.58 
  -4  -4   8    5.56    0.50 
  -4   4   8    5.43    0.45 
  -4   4   8    5.35    0.52 
   4  -4  -8    5.09    0.57 
   4  -4  -8    4.91    0.48 
   4   4  -8    5.26    0.56 
   4   4  -8    5.49    0.58 
  -4  -4   7    3.83    0.46 
  -4  -4   7    4.15    0.43 
  -4   4   7    4.25    0.42 
  -4   4   7    3.41    0.43 
   4  -4  -7    3.18    0.45 
   4  -4  -7    3.22    0.45 
   4   4  -7    4.23    0.46 
  -4  -4   6    1.23    0.34 
  -4  -4   6    1.22    0.26 
  -4  -4   6    1.38    0.28 
  -4   4   6    1.26    0.30 
  -4   4   6    1.28    0.34 
   4  -4  -6    1.23    0.38 
   4  -4  -6    1.32    0.36 
   4   4  -6    1.12    0.33 
  -4  -4   5    1.06    0.31 
  -4   4   5    1.09    0.29 
  -4   4   5    0.84    0.31 
   4  -4  -5    0.96    0.35 
   4  -4  -5    0.94    0.32 
   4   4  -5    1.18    0.31 
  -4  -4   4   31.68    0.85 
  -4   4   4   29.81    0.83 
  -4   4   4   28.35    0.86 
   4  -4  -4   29.66    0.92 
   4  -4  -4   31.28    0.88 
   4   4  -4   29.66    0.80 
  -4  -4   3   34.48    0.85 
  -4   4   3   32.75    0.86 
  -4   4   3   32.48    0.92 
   4  -4  -3   33.76    0.95 
   4  -4  -3   33.05    0.88 
  -4  -4   2   19.13    0.66 
  -4   4   2   19.15    0.71 
  -4   4   2   19.27    0.76 
   4  -4  -2   19.68    0.77 
   4  -4  -2   20.31    0.71 
  -4  -4   1   13.64    0.56 
  -4   4   1   13.72    0.65 
  -4   4   1   13.39    0.67 
   4  -4  -1   13.73    0.68 
   4  -4  -1   14.87    0.63 
  -4  -4   0    0.96    0.25 
  -4   4   0    0.99    0.33 
  -4   4   0    0.83    0.33 
   4  -4   0    0.50    0.30 
   4  -4   0    0.88    0.28 
  -4  -4  -1    2.71    0.31 
  -4   4  -1    2.37    0.39 
  -4   4  -1    1.64    0.36 
   4  -4   1    2.01    0.38 
   4  -4   1    2.45    0.34 
   4  -4   1    2.61    0.41 
  -4  -4  -2   -0.03    0.19 
  -4   4  -2   -0.12    0.25 
  -4   4  -2   -0.23    0.25 
   4  -4   2    0.06    0.29 
   4  -4   2    0.30    0.24 
   4  -4   2   -0.18    0.28 
  -4  -4  -3   49.47    0.78 
  -4   4  -3   47.51    1.13 
  -4   4  -3   46.30    1.10 
   4  -4   3   48.94    1.09 
   4  -4   3   50.26    1.10 
   4   4   3   47.53    1.07 
  -4   4  -4    0.99    0.33 
  -4   4  -4    1.53    0.38 
   4  -4   4    1.34    0.37 
   4  -4   4    1.07    0.36 
   4   4   4    1.35    0.36 
  -4   4  -5   22.37    0.88 
  -4   4  -5   22.60    0.88 
  -4   4  -5   22.66    0.87 
   4  -4   5   24.31    0.83 
   4  -4   5   24.35    0.84 
   4   4   5   22.83    0.84 
  -4   4  -6    0.03    0.32 
  -4   4  -6    0.24    0.32 
  -4   4  -6    0.38    0.34 
   4  -4   6    0.40    0.33 
   4  -4   6    0.16    0.37 
   4  -4   6   -0.07    0.30 
   4   4   6   -0.03    0.30 
  -4  -4  -7   21.42    0.81 
  -4   4  -7   18.80    0.77 
  -4   4  -7   20.00    0.88 
  -4   4  -7   19.49    0.87 
  -4   4  -7   21.20    0.88 
   4  -4   7   22.44    0.84 
   4  -4   7   21.01    0.93 
   4  -4   7   21.73    0.85 
   4   4   7   21.20    0.88 
   4   4   7   18.36    0.77 
  -4  -4  -8   19.10    0.80 
  -4   4  -8   17.57    0.80 
  -4   4  -8   17.81    0.88 
  -4   4  -8   18.18    0.85 
  -4   4  -8   16.75    0.84 
   4  -4   8   19.51    0.82 
   4  -4   8   18.68    0.93 
   4  -4   8   19.59    0.80 
   4   4   8   17.39    0.84 
   4   4   8   15.26    0.76 
  -4  -4  -9   21.89    0.87 
  -4   4  -9   19.77    0.83 
  -4   4  -9   19.86    0.93 
  -4   4  -9   21.34    0.93 
  -4   4  -9   21.40    0.96 
  -4   4  -9   20.96    0.93 
   4  -4   9   23.15    0.88 
   4  -4   9   21.73    0.95 
   4  -4   9   22.08    0.84 
   4   4   9   21.99    0.94 
   4   4   9   18.50    0.84 
  -4  -4 -10   -0.06    0.32 
  -4   4 -10    0.13    0.33 
  -4   4 -10   -0.19    0.36 
  -4   4 -10   -0.07    0.35 
  -4   4 -10    0.29    0.31 
  -4   4 -10   -0.18    0.35 
   4  -4  10    0.11    0.34 
   4  -4  10    0.20    0.45 
   4  -4  10    0.34    0.36 
   4   4  10   -0.04    0.37 
   4   4  10    0.22    0.34 
  -4  -4 -11    1.14    0.40 
  -4   4 -11    0.94    0.40 
  -4   4 -11    1.49    0.45 
  -4   4 -11    1.27    0.43 
  -4   4 -11    1.16    0.37 
  -4   4 -11    1.33    0.45 
   4  -4  11    1.17    0.46 
   4  -4  11    1.24    0.39 
   4  -4  11    1.13    0.50 
   4  -4  11    0.97    0.40 
   4   4  11    0.98    0.44 
  -4  -4 -12   14.52    0.82 
  -4   4 -12   15.54    0.82 
  -4   4 -12   14.29    0.89 
  -4   4 -12   13.64    0.89 
  -4   4 -12   16.42    0.84 
  -4   4 -12   13.18    0.86 
   4  -4  12   15.04    0.91 
   4  -4  12   15.78    0.82 
   4  -4  12   14.90    0.98 
   4  -4  12   15.85    1.17 
   4   4  12   14.60    0.91 
  -4  -4 -13    0.87    0.40 
  -4   4 -13    1.02    0.43 
  -4   4 -13    0.98    0.44 
  -4   4 -13    1.00    0.45 
  -4   4 -13    1.32    0.43 
  -4   4 -13    1.17    0.47 
   4  -4  13    1.17    0.48 
   4  -4  13    0.97    0.53 
   4   4  13    1.22    0.50 
  -4  -4 -14    0.27    0.44 
  -4  -4 -14    0.08    0.38 
  -4   4 -14    0.59    0.39 
  -4   4 -14    0.30    0.41 
  -4   4 -14    0.59    0.40 
  -4   4 -14    0.13    0.38 
   4  -4  14    0.28    0.43 
   4  -4  14    0.31    0.51 
   4   4  14    0.34    0.43 
  -4  -4 -15    9.48    0.83 
  -4  -4 -15   10.81    0.85 
  -4   4 -15    8.83    0.78 
  -4   4 -15    9.37    0.85 
  -4   4 -15    9.90    0.81 
  -4   4 -15    9.13    0.84 
   4  -4  15    9.80    0.93 
   4  -4  15   10.48    0.98 
   4  -4  15    9.46    0.89 
   4   4  15    9.41    0.90 
  -4  -4 -16    0.94    0.49 
  -4  -4 -16    1.40    0.49 
  -4   4 -16    0.34    0.39 
  -4   4 -16    0.82    0.47 
  -4   4 -16    1.25    0.48 
  -4   4 -16    1.24    0.50 
   4  -4  16    0.83    0.52 
   4  -4  16    1.28    0.61 
   4  -4  16    1.60    0.53 
   4   4  16    1.55    0.57 
  -4  -4 -17    1.89    0.55 
  -4  -4 -17    0.92    0.47 
  -4   4 -17    0.80    0.42 
  -4   4 -17    0.74    0.49 
  -4   4 -17    0.71    0.47 
  -4   4 -17    0.82    0.49 
   4  -4  17    0.90    0.52 
   4  -4  17    1.06    0.61 
   4  -4  17    1.08    0.55 
   4   4  17    0.89    0.55 
  -4  -5  18    0.42    0.51 
  -4  -5  18    0.17    0.46 
  -4  -5  18    0.26    0.52 
  -4   5  18    0.20    0.43 
  -4   5  18   -0.26    0.40 
   4  -5 -18    0.29    0.51 
   4  -5 -18   -0.28    0.42 
   4  -5 -18    0.56    0.44 
   4   5 -18    0.23    0.49 
   4   5 -18   -0.18    0.47 
   4   5 -18    0.48    0.47 
  -4  -5  17    0.54    0.50 
  -4  -5  17    0.30    0.48 
  -4  -5  17   -0.22    0.49 
  -4   5  17    0.29    0.44 
  -4   5  17    0.46    0.42 
   4  -5 -17    0.05    0.49 
   4  -5 -17    0.65    0.48 
   4  -5 -17    0.26    0.42 
   4   5 -17    0.42    0.50 
   4   5 -17    0.44    0.48 
   4   5 -17    0.21    0.49 
  -4  -5  16    2.54    0.58 
  -4  -5  16    3.29    0.60 
  -4  -5  16    3.36    0.64 
  -4   5  16    2.55    0.54 
  -4   5  16    3.22    0.55 
   4  -5 -16    3.22    0.66 
   4  -5 -16    2.44    0.58 
   4  -5 -16    2.99    0.58 
   4   5 -16    2.65    0.60 
   4   5 -16    3.07    0.60 
   4   5 -16    2.52    0.60 
  -4  -5  15    0.28    0.48 
  -4  -5  15   -0.02    0.41 
  -4  -5  15   -0.07    0.44 
  -4   5  15   -0.28    0.34 
  -4   5  15    0.02    0.37 
   4  -5 -15    0.41    0.49 
   4  -5 -15   -0.11    0.40 
   4  -5 -15    0.02    0.40 
   4   5 -15   -0.09    0.44 
   4   5 -15   -0.44    0.40 
   4   5 -15    0.06    0.44 
  -4  -5  14    8.00    0.84 
  -4  -5  14    9.18    0.83 
  -4  -5  14    8.07    0.84 
  -4   5  14    6.41    0.66 
  -4   5  14    7.67    0.72 
   4  -5 -14    8.54    0.86 
   4  -5 -14    7.83    0.73 
   4  -5 -14    7.20    0.70 
   4   5 -14    8.15    0.82 
   4   5 -14    7.87    0.79 
   4   5 -14    8.37    0.84 
  -4  -5  13    0.19    0.42 
  -4  -5  13    0.10    0.38 
  -4  -5  13    0.09    0.40 
  -4   5  13    0.35    0.35 
  -4   5  13    0.33    0.37 
   4  -5 -13    0.22    0.43 
   4  -5 -13    0.19    0.37 
   4  -5 -13   -0.21    0.35 
   4   5 -13    0.04    0.41 
   4   5 -13    0.09    0.39 
   4   5 -13    0.19    0.43 
  -4  -5  12   26.49    1.12 
  -4  -5  12   26.27    1.02 
  -4  -5  12   26.12    1.11 
  -4   5  12   22.31    0.97 
  -4   5  12   25.60    0.99 
   4  -5 -12   25.79    1.12 
   4  -5 -12   26.23    1.05 
   4  -5 -12   22.75    0.97 
   4   5 -12   24.43    1.05 
   4   5 -12   25.75    1.07 
   4   5 -12   24.42    1.08 
  -4  -5  11   11.33    0.84 
  -4  -5  11   11.62    0.77 
  -4  -5  11   11.41    0.81 
  -4   5  11    9.93    0.69 
  -4   5  11   10.24    0.72 
   4  -5 -11   12.02    0.86 
   4  -5 -11   11.43    0.74 
   4  -5 -11   10.31    0.72 
   4   5 -11   12.08    0.81 
   4   5 -11   11.30    0.81 
   4   5 -11   11.01    0.82 
  -4  -5  10    4.06    0.58 
  -4  -5  10    3.77    0.50 
  -4   5  10    2.85    0.46 
  -4   5  10    3.98    0.53 
   4  -5 -10    3.98    0.59 
   4  -5 -10    4.70    0.58 
   4  -5 -10    4.53    0.56 
   4   5 -10    3.51    0.53 
   4   5 -10    3.89    0.55 
   4   5 -10    2.96    0.52 
  -4  -5   9    2.01    0.46 
  -4  -5   9    2.17    0.42 
  -4   5   9    1.79    0.37 
  -4   5   9    2.44    0.46 
   4  -5  -9    2.25    0.48 
   4  -5  -9    2.36    0.47 
   4  -5  -9    2.81    0.45 
   4  -5  -9    2.61    0.48 
   4   5  -9    2.55    0.47 
   4   5  -9    1.92    0.48 
   4   5  -9    2.18    0.47 
  -4  -5   8    1.62    0.44 
  -4  -5   8    1.83    0.39 
  -4   5   8    2.06    0.52 
  -4   5   8    1.72    0.43 
   4  -5  -8    1.35    0.44 
   4  -5  -8    2.19    0.48 
   4  -5  -8    1.61    0.39 
   4  -5  -8    1.64    0.40 
   4   5  -8    1.96    0.44 
   4   5  -8    1.47    0.43 
   4   5  -8    1.54    0.44 
  -4  -5   7    0.13    0.33 
  -4  -5   7    0.02    0.29 
  -4   5   7    0.03    0.29 
  -4   5   7    0.17    0.33 
   4  -5  -7    0.09    0.39 
   4  -5  -7   -0.04    0.35 
   4  -5  -7    0.32    0.31 
   4   5  -7   -0.06    0.32 
   4   5  -7   -0.01    0.34 
   4   5  -7   -0.27    0.35 
  -4  -5   6    0.59    0.35 
  -4  -5   6    0.70    0.31 
  -4   5   6    0.34    0.31 
  -4   5   6    0.34    0.34 
   4  -5  -6    0.56    0.40 
   4  -5  -6    0.43    0.36 
   4  -5  -6    0.32    0.30 
   4   5  -6    0.49    0.36 
   4   5  -6    0.15    0.36 
   4   5  -6    0.78    0.38 
  -4  -5   5    1.15    0.37 
  -4  -5   5    1.05    0.35 
  -4   5   5    1.09    0.34 
  -4   5   5    0.78    0.36 
   4  -5  -5    0.94    0.43 
   4  -5  -5    1.51    0.41 
   4   5  -5    0.90    0.36 
   4   5  -5    1.24    0.41 
   4   5  -5    1.41    0.41 
  -4  -5   4   15.31    0.75 
  -4   5   4   15.80    0.73 
  -4   5   4   15.94    0.80 
   4  -5  -4   15.11    0.84 
   4  -5  -4   15.38    0.81 
   4   5  -4   14.45    0.73 
   4   5  -4   15.49    0.76 
  -4  -5   3    5.99    0.56 
  -4   5   3    6.00    0.60 
  -4   5   3    5.26    0.62 
   4  -5  -3    5.93    0.67 
   4  -5  -3    5.61    0.59 
   4   5  -3    5.67    0.56 
  -4  -5   2   39.37    1.00 
  -4   5   2   37.58    1.05 
  -4   5   2   38.60    1.14 
   4  -5  -2   40.00    1.18 
   4  -5  -2   41.56    1.08 
   4   5  -2   40.03    0.99 
  -4  -5   1   13.33    0.64 
  -4   5   1   11.78    0.71 
  -4   5   1   12.49    0.77 
   4  -5  -1   13.57    0.79 
   4  -5  -1   13.49    0.69 
   4   5  -1   12.49    0.64 
  -4  -5   0    1.10    0.31 
  -4   5   0    0.95    0.37 
  -4   5   0    0.74    0.40 
  -4   5   0    1.08    0.37 
   4  -5   0    1.38    0.41 
   4  -5   0    0.81    0.35 
  -4  -5  -1    1.36    0.31 
  -4   5  -1    1.27    0.39 
  -4   5  -1    1.43    0.44 
  -4   5  -1    1.45    0.39 
   4  -5   1    1.68    0.43 
   4  -5   1    1.62    0.36 
   4  -5   1    1.54    0.42 
  -4   5  -2    0.28    0.35 
  -4   5  -2    0.19    0.36 
  -4   5  -2    0.07    0.32 
   4  -5   2   -0.32    0.35 
   4  -5   2    0.01    0.35 
   4   5   2   -0.06    0.30 
  -4   5  -3    0.55    0.38 
  -4   5  -3    0.23    0.37 
  -4   5  -3    0.20    0.35 
   4  -5   3    0.12    0.36 
   4  -5   3    0.03    0.35 
   4   5   3    0.22    0.31 
  -4   5  -4    0.12    0.38 
  -4   5  -4    0.32    0.38 
  -4   5  -4    0.31    0.36 
   4  -5   4   -0.04    0.35 
   4  -5   4   -0.33    0.31 
   4   5   4    0.50    0.34 
  -4   5  -5   -0.12    0.32 
  -4   5  -5    0.18    0.37 
  -4   5  -5   -0.04    0.38 
  -4   5  -5   -0.19    0.35 
   4  -5   5   -0.03    0.36 
   4  -5   5    0.20    0.35 
   4   5   5   -0.31    0.31 
  -4   5  -6   16.79    0.81 
  -4   5  -6   17.42    0.93 
  -4   5  -6   17.62    0.94 
  -4   5  -6   17.56    0.90 
   4  -5   6   18.41    0.85 
   4  -5   6   18.52    0.92 
   4  -5   6   20.48    0.88 
   4   5   6   16.91    0.84 
  -4  -5  -7    9.00    0.69 
  -4   5  -7    8.20    0.69 
  -4   5  -7    7.86    0.76 
  -4   5  -7    9.20    0.80 
  -4   5  -7    8.36    0.74 
   4  -5   7    8.78    0.73 
   4  -5   7    9.08    0.84 
   4  -5   7    9.07    0.74 
   4   5   7    6.73    0.58 
   4   5   7    7.99    0.73 
   4   5   7    7.76    0.67 
  -4  -5  -8    1.56    0.41 
  -4   5  -8    1.95    0.47 
  -4   5  -8    1.95    0.48 
  -4   5  -8    1.26    0.45 
  -4   5  -8    1.37    0.45 
   4  -5   8    1.63    0.44 
   4  -5   8    1.70    0.54 
   4  -5   8    1.71    0.45 
   4   5   8    1.53    0.42 
   4   5   8    1.51    0.47 
   4   5   8    1.35    0.44 
  -4  -5  -9   -0.03    0.34 
  -4   5  -9    0.42    0.35 
  -4   5  -9   -0.11    0.40 
  -4   5  -9    0.23    0.42 
  -4   5  -9    0.10    0.40 
   4  -5   9   -0.12    0.36 
   4  -5   9    0.30    0.48 
   4  -5   9    0.39    0.37 
   4   5   9    0.23    0.37 
   4   5   9    0.11    0.40 
   4   5   9   -0.07    0.33 
  -4  -5 -10    0.38    0.37 
  -4   5 -10    0.80    0.41 
  -4   5 -10    0.20    0.44 
  -4   5 -10    0.62    0.45 
  -4   5 -10    0.65    0.46 
   4  -5  10    0.17    0.43 
   4  -5  10    0.26    0.39 
   4  -5  10    0.98    0.54 
   4  -5  10    0.61    0.47 
   4   5  10    0.13    0.37 
   4   5  10    0.44    0.43 
  -4  -5 -11    8.67    0.76 
  -4   5 -11    8.29    0.75 
  -4   5 -11    8.71    0.87 
  -4   5 -11    7.40    0.81 
  -4   5 -11    6.73    0.79 
   4  -5  11    8.24    0.87 
   4  -5  11    8.14    0.92 
   4   5  11    7.85    0.84 
  -4  -5 -12    0.10    0.39 
  -4   5 -12    0.23    0.36 
  -4   5 -12    0.13    0.46 
  -4   5 -12    0.15    0.44 
  -4   5 -12    0.52    0.47 
   4  -5  12    0.44    0.49 
   4  -5  12    0.50    0.49 
   4   5  12    0.14    0.46 
  -4  -5 -13    0.09    0.38 
  -4   5 -13    0.31    0.43 
  -4   5 -13    0.37    0.47 
  -4   5 -13    0.41    0.48 
   4  -5  13    0.30    0.47 
   4  -5  13    0.89    0.60 
   4   5  13    0.32    0.47 
  -4  -5 -14    6.70    0.82 
  -4  -5 -14    6.06    0.75 
  -4   5 -14    6.51    0.76 
  -4   5 -14    6.09    0.78 
  -4   5 -14    6.69    0.75 
  -4   5 -14    5.67    0.72 
   4  -5  14    6.12    0.79 
   4  -5  14    6.58    0.83 
   4   5  14    6.16    0.77 
  -4  -6  14    6.50    0.81 
  -4  -6  14    6.36    0.74 
  -4  -6  14    5.76    0.76 
  -4   6  14    5.66    0.68 
   4  -6 -14    6.78    0.85 
   4  -6 -14    6.08    0.74 
   4  -6 -14    6.38    0.76 
   4   6 -14    6.67    0.80 
   4   6 -14    7.87    0.86 
   4   6 -14    6.17    0.79 
  -4  -6  13    0.17    0.47 
  -4  -6  13    0.03    0.44 
  -4  -6  13    0.04    0.47 
  -4   6  13    0.20    0.41 
  -4   6  13    0.39    0.43 
   4  -6 -13    0.48    0.52 
   4  -6 -13    0.14    0.49 
   4  -6 -13   -0.29    0.43 
   4  -6 -13    0.10    0.42 
   4   6 -13    0.01    0.44 
   4   6 -13    0.68    0.48 
   4   6 -13   -0.35    0.44 
  -4  -6  12    0.70    0.51 
  -4  -6  12    0.82    0.46 
  -4  -6  12    0.53    0.47 
  -4   6  12    0.35    0.40 
  -4   6  12    0.60    0.44 
   4  -6 -12    0.57    0.51 
   4  -6 -12    0.68    0.53 
   4  -6 -12    1.44    0.49 
   4  -6 -12    1.26    0.48 
   4   6 -12    1.18    0.51 
   4   6 -12    0.36    0.48 
   4   6 -12    1.28    0.52 
  -4  -6  11    0.79    0.50 
  -4  -6  11    1.07    0.47 
  -4  -6  11    0.54    0.46 
  -4   6  11    1.11    0.44 
  -4   6  11    0.94    0.47 
   4  -6 -11    0.53    0.50 
   4  -6 -11    0.62    0.52 
   4  -6 -11    0.90    0.45 
   4  -6 -11    1.26    0.48 
   4   6 -11    0.45    0.46 
   4   6 -11    0.75    0.48 
   4   6 -11    1.25    0.51 
  -4  -6  10   16.72    1.03 
  -4  -6  10   14.93    0.91 
  -4   6  10   13.49    0.87 
  -4   6  10   13.44    0.88 
   4  -6 -10   15.29    1.03 
   4  -6 -10   14.18    0.99 
   4  -6 -10   14.60    0.85 
   4  -6 -10   13.74    0.87 
   4   6 -10   15.37    0.95 
   4   6 -10   15.71    0.98 
   4   6 -10   13.84    0.95 
  -4  -6   9    3.08    0.56 
  -4  -6   9    2.74    0.51 
  -4   6   9    2.46    0.51 
  -4   6   9    2.45    0.52 
   4  -6  -9    2.37    0.56 
   4  -6  -9    3.01    0.59 
   4  -6  -9    2.05    0.48 
   4  -6  -9    2.66    0.51 
   4   6  -9    2.11    0.52 
   4   6  -9    2.42    0.53 
   4   6  -9    2.41    0.53 
  -4  -6   8    3.27    0.54 
  -4  -6   8    2.66    0.49 
  -4   6   8    3.39    0.55 
   4  -6  -8    3.61    0.65 
   4  -6  -8    2.68    0.55 
   4  -6  -8    2.98    0.50 
   4  -6  -8    3.41    0.53 
   4   6  -8    2.80    0.54 
   4   6  -8    2.71    0.53 
   4   6  -8    2.70    0.55 
  -4  -6   7   -0.03    0.36 
  -4  -6   7    0.28    0.37 
  -4   6   7    0.28    0.42 
   4  -6  -7   -0.12    0.45 
   4  -6  -7    0.28    0.42 
   4  -6  -7   -0.25    0.34 
   4   6  -7    0.28    0.40 
   4   6  -7    0.27    0.41 
   4   6  -7    0.00    0.41 
  -4  -6   6    7.42    0.73 
  -4  -6   6    7.89    0.68 
  -4   6   6    6.83    0.77 
   4  -6  -6    7.54    0.83 
   4  -6  -6    7.18    0.76 
   4  -6  -6    6.69    0.60 
   4   6  -6    8.13    0.76 
   4   6  -6    7.04    0.73 
  -4  -6   5    4.09    0.53 
  -4   6   5    3.49    0.51 
  -4   6   5    2.81    0.52 
   4  -6  -5    3.71    0.62 
   4  -6  -5    3.98    0.59 
   4   6  -5    3.49    0.54 
   4   6  -5    3.20    0.54 
  -4  -6   4    2.79    0.47 
  -4   6   4    3.56    0.53 
  -4   6   4    2.70    0.54 
   4  -6  -4    2.81    0.57 
   4  -6  -4    2.59    0.53 
   4   6  -4    2.26    0.48 
   4   6  -4    2.42    0.49 
  -4  -6   3   18.92    0.87 
  -4  -6   3   19.81    0.87 
  -4   6   3   18.57    0.92 
  -4   6   3   18.11    0.98 
   4  -6  -3   17.72    1.03 
   4  -6  -3   18.78    0.91 
   4   6  -3   17.66    0.87 
   4   6  -3   19.23    0.90 
   4   6  -3   17.50    0.83 
  -4  -6   2    0.18    0.32 
  -4   6   2    0.16    0.38 
  -4   6   2   -0.23    0.40 
  -4   6   2    0.49    0.39 
   4  -6  -2    0.06    0.42 
   4  -6  -2    0.14    0.40 
   4   6  -2    0.08    0.42 
   4   6  -2    0.52    0.39 
   4   6  -2    0.14    0.34 
  -4   6   1   13.68    0.88 
  -4   6   1   13.18    0.90 
  -4   6   1   12.92    0.79 
   4  -6  -1   14.44    0.91 
   4  -6  -1   13.86    0.83 
   4   6  -1   11.27    0.69 
  -4   6   0    0.13    0.39 
  -4   6   0    0.20    0.43 
  -4   6   0    0.31    0.39 
   4  -6   0    0.24    0.42 
   4  -6   0    0.07    0.43 
   4   6   0    0.17    0.33 
  -4   6  -1   22.10    1.05 
  -4   6  -1   22.47    1.08 
  -4   6  -1   23.22    1.00 
   4  -6   1   23.67    1.08 
   4  -6   1   22.46    1.05 
   4   6   1   20.42    0.91 
  -4   6  -2    5.85    0.73 
  -4   6  -2    4.65    0.62 
  -4   6  -2    4.52    0.60 
   4  -6   2    5.76    0.66 
   4  -6   2    5.42    0.63 
   4   6   2    5.38    0.57 
   4   6   2    5.60    0.61 
  -4   6  -3    0.53    0.45 
  -4   6  -3    0.04    0.43 
  -4   6  -3    1.20    0.47 
   4  -6   3    0.52    0.44 
   4  -6   3    0.69    0.45 
   4   6   3    0.39    0.34 
   4   6   3    0.74    0.38 
  -4   6  -4    2.26    0.55 
  -4   6  -4    2.48    0.57 
  -4   6  -4    2.91    0.57 
   4  -6   4    2.62    0.54 
   4  -6   4    2.40    0.52 
   4   6   4    2.54    0.46 
   4   6   4    2.03    0.46 
  -4   6  -5    0.24    0.45 
  -4   6  -5    0.24    0.49 
  -4   6  -5    0.45    0.46 
   4  -6   5    0.47    0.43 
   4  -6   5    0.52    0.44 
   4   6   5    0.06    0.35 
   4   6   5    0.23    0.38 
  -4   6  -6    7.70    0.89 
  -4   6  -6    7.71    0.87 
  -4   6  -6    7.00    0.80 
   4  -6   6    8.49    0.80 
   4  -6   6    7.33    0.89 
   4  -6   6    7.55    0.77 
   4   6   6    7.19    0.68 
   4   6   6    7.96    0.73 
  -4  -6  -7   16.77    0.90 
  -4   6  -7   15.68    1.03 
  -4   6  -7   15.29    1.03 
  -4   6  -7   15.38    1.00 
   4  -6   7   18.58    0.98 
   4  -6   7   16.97    1.10 
   4  -6   7   18.59    1.00 
   4   6   7   14.78    0.86 
  -4  -6  -8    0.27    0.38 
  -4   6  -8    0.30    0.48 
  -4   6  -8   -0.30    0.44 
  -4   6  -8    0.02    0.45 
   4  -6   8    0.04    0.47 
   4  -6   8    0.52    0.47 
   4  -6   8    0.16    0.52 
   4  -6   8    0.53    0.47 
   4   6   8    0.27    0.38 
  -4  -6  -9   24.49    1.53 
  -4   6  -9   22.03    1.09 
  -4   6  -9   23.79    1.22 
  -4   6  -9   24.91    1.24 
  -4   6  -9   23.88    1.20 
   4  -6   9   23.30    1.21 
   4  -6   9   25.82    1.29 
   4   6   9   20.90    1.01 
  -4   6 -10    9.96    0.84 
  -4   6 -10    9.78    0.97 
  -4   6 -10    9.42    0.94 
   4  -6  10   10.19    0.98 
   4  -6  10   10.54    1.05 
   4   6  10    8.64    0.80 
  -4  -7   5    6.90    0.77 
   4  -7  -5    5.99    0.82 
   4   7  -5    5.23    0.66 
  -4   7   4    1.00    0.52 
   4  -7  -4    1.22    0.57 
   4  -7  -4    1.66    0.56 
   4   7  -4    1.42    0.52 
  -4   7   3    3.13    0.58 
  -4   7   3    3.35    0.63 
   4  -7  -3    4.16    0.72 
   4  -7  -3    4.25    0.66 
  -4   7   2   11.57    0.88 
  -4   7   2   10.59    0.94 
   4  -7  -2   11.63    0.98 
  -4   7   1    1.52    0.54 
  -4   7   1    1.28    0.54 
   4  -7  -1    1.41    0.56 
   4  -7  -1    1.03    0.57 
   4   7  -1    0.98    0.46 
  -4   7   0   11.66    0.96 
  -4   7   0   11.74    0.99 
  -4   7   0   11.69    0.92 
   4  -7   0   12.89    0.99 
   4  -7   0   13.46    1.08 
   4   7   0   10.08    0.77 
  -4   7  -1    4.39    0.68 
  -4   7  -1    4.73    0.73 
  -4   7  -1    5.56    0.71 
   4  -7   1    5.80    0.74 
   4  -7   1    4.92    0.74 
   4   7   1    3.78    0.58 
  -5   0  25   -0.24    0.45 
   5   0 -25   -0.11    0.36 
   5   0 -25   -0.07    0.39 
   5   0 -25   -0.01    0.44 
  -5   0  24   10.00    0.91 
   5   0 -24    9.17    0.76 
   5   0 -24   10.30    0.81 
   5   0 -24    9.62    0.90 
  -5   0  23   -0.02    0.46 
  -5   0  23    0.02    0.45 
   5   0 -23    0.02    0.36 
   5   0 -23    0.06    0.38 
   5   0 -23    0.26    0.41 
  -5   0  22   48.87    1.27 
  -5   0  22   50.37    1.45 
   5   0 -22   48.47    1.35 
   5   0 -22   47.73    1.36 
   5   0 -22   48.16    1.22 
  -5   0  21   -0.21    0.33 
  -5   0  21    0.06    0.38 
   5   0 -21   -0.18    0.32 
   5   0 -21   -0.04    0.37 
   5   0 -21    0.17    0.31 
  -5   0  20  113.66    1.75 
  -5   0  20  114.95    1.95 
   5   0 -20  114.88    1.86 
   5   0 -20  112.63    1.85 
  -5   0  19   -0.05    0.30 
  -5   0  19    0.05    0.36 
   5   0 -19    0.12    0.30 
   5   0 -19   -0.23    0.32 
  -5   0  18    5.29    0.56 
  -5   0  18    5.20    0.62 
   5   0 -18    5.44    0.51 
   5   0 -18    5.17    0.57 
  -5   0  17   -0.01    0.27 
  -5   0  17    0.08    0.32 
   5   0 -17    0.19    0.29 
   5   0 -17   -0.23    0.29 
  -5   0  16  226.56    2.17 
  -5   0  16  230.36    2.35 
   5   0 -16  235.01    1.87 
   5   0 -16  226.97    2.27 
  -5   0  15    0.16    0.27 
  -5   0  15   -0.04    0.30 
   5   0 -15    0.25    0.26 
  -5   0  14  207.01    1.96 
  -5   0  14  212.95    2.10 
  -5   0  13   -0.02    0.23 
  -5   0  13    0.18    0.27 
  -5   0  12   55.86    1.00 
  -5   0  12   56.04    1.04 
  -5   0  11   -0.04    0.20 
  -5   0  10   23.57    0.65 
  -5   0   9   -0.08    0.19 
  -5   0   8    7.12    0.42 
  -5   0   7    0.19    0.22 
  -5   0   6  788.49    6.36 
  -5   0   5   -0.10    0.18 
  -5   0   4  374.14    2.34 
   5   0  -4  394.24    2.25 
  -5   0   3   -0.08    0.18 
   5   0  -3    0.26    0.17 
  -5   0   2  110.22    0.97 
   5   0  -2  113.75    0.96 
  -5   0   1    0.02    0.16 
   5   0  -1   -0.06    0.17 
  -5   0   0   15.20    0.41 
   5   0   0   15.74    0.46 
   5   0   1    0.02    0.18 
   5   0   2    3.24    0.34 
  -5   0  -3   -0.05    0.15 
   5   0   3   -0.17    0.20 
  -5   0  -4   15.20    0.42 
  -5   0  -5    0.07    0.15 
  -5   0  -6    3.35    0.28 
  -5   0  -7   -0.12    0.14 
  -5   0  -8    4.74    0.31 
   5   0   8    5.25    0.43 
  -5   0  -9    0.03    0.17 
   5   0   9   -0.12    0.16 
   5   0   9   -0.12    0.23 
  -5   0 -10   21.37    0.55 
   5   0  10   21.01    0.53 
   5   0  10   22.61    0.73 
   5   0  10   19.61    0.89 
  -5   0 -11    0.01    0.18 
  -5   0 -11    0.14    0.28 
   5   0  11   -0.06    0.19 
   5   0  11   -0.28    0.26 
   5   0  11    0.18    0.29 
  -5   0 -12    1.33    0.35 
   5   0  12    1.20    0.35 
   5   0  12    1.46    0.37 
  -5   0 -13    0.17    0.31 
  -5   0 -13   -0.04    0.31 
   5   0  13   -0.08    0.32 
  -5   0 -14    3.84    0.50 
  -5   0 -14    3.20    0.48 
   5   0  14    3.42    0.50 
  -5   0 -15   -0.37    0.30 
  -5   0 -15   -0.36    0.30 
   5   0  15   -0.06    0.34 
  -5   0 -16    1.26    0.38 
  -5   0 -16    1.43    0.43 
   5   0  16    1.68    0.45 
  -5   0 -17   -0.33    0.34 
  -5   0 -17   -0.17    0.36 
   5   0  17    0.16    0.38 
  -5   0 -18   -0.12    0.31 
  -5   0 -18    0.03    0.38 
   5   0  18   -0.15    0.39 
  -5   0 -19   -0.12    0.37 
  -5   0 -19    0.32    0.43 
   5   0  19   -0.19    0.43 
  -5   0 -20    1.04    0.48 
  -5   0 -20    1.06    0.50 
   5   0  20    0.96    0.52 
  -5  -1  24   13.03    0.89 
  -5  -1  24   14.36    1.08 
  -5   1  24   14.14    0.99 
   5  -1 -24   13.49    0.92 
   5  -1 -24   13.59    0.92 
   5  -1 -24   12.77    0.80 
   5   1 -24   14.86    0.87 
   5   1 -24   13.82    0.86 
   5   1 -24   13.77    0.98 
  -5  -1  23    0.44    0.40 
  -5  -1  23    0.45    0.49 
  -5   1  23    0.64    0.44 
   5  -1 -23    0.21    0.39 
   5  -1 -23    0.48    0.38 
   5  -1 -23   -0.12    0.34 
   5   1 -23    0.59    0.38 
   5   1 -23    0.54    0.38 
   5   1 -23    0.69    0.47 
  -5  -1  22    0.00    0.35 
  -5  -1  22    0.18    0.42 
  -5   1  22   -0.21    0.37 
   5  -1 -22   -0.31    0.35 
   5  -1 -22   -0.12    0.34 
   5  -1 -22    0.05    0.33 
   5   1 -22   -0.15    0.31 
   5   1 -22   -0.08    0.34 
   5   1 -22   -0.02    0.40 
  -5  -1  21   45.41    1.27 
  -5  -1  21   46.74    1.40 
  -5   1  21   42.81    1.50 
  -5   1  21   45.01    1.31 
   5  -1 -21   44.29    1.30 
   5  -1 -21   44.59    1.22 
   5  -1 -21   42.28    1.19 
   5   1 -21   44.23    1.20 
   5   1 -21   44.02    1.21 
   5   1 -21   43.47    1.31 
  -5  -1  20   -0.19    0.31 
  -5  -1  20    0.24    0.42 
  -5   1  20    0.16    0.30 
  -5   1  20    0.46    0.38 
   5  -1 -20    0.21    0.35 
   5  -1 -20   -0.21    0.31 
   5  -1 -20    0.33    0.33 
   5   1 -20    0.28    0.31 
   5   1 -20    0.07    0.31 
   5   1 -20    0.44    0.38 
  -5  -1  19   10.98    0.72 
  -5  -1  19   12.19    0.82 
  -5   1  19   10.08    0.65 
  -5   1  19   11.80    0.75 
   5  -1 -19   11.05    0.64 
   5  -1 -19   10.03    0.70 
   5  -1 -19   11.34    0.68 
   5  -1 -19   10.82    0.65 
   5   1 -19   11.35    0.67 
   5   1 -19   11.25    0.75 
  -5  -1  18    1.76    0.40 
  -5  -1  18    1.78    0.43 
  -5   1  18    2.02    0.38 
  -5   1  18    2.53    0.46 
   5  -1 -18    1.73    0.35 
   5  -1 -18    2.03    0.42 
   5  -1 -18    1.52    0.36 
   5   1 -18    1.70    0.37 
   5   1 -18    1.57    0.39 
  -5  -1  17   55.64    1.23 
  -5  -1  17   55.42    1.27 
  -5   1  17   56.18    1.14 
  -5   1  17   55.07    1.26 
   5  -1 -17   56.15    1.11 
   5  -1 -17   53.77    1.24 
   5   1 -17   54.08    1.18 
   5   1 -17   53.28    1.23 
  -5  -1  16  223.89    2.28 
  -5  -1  16  216.38    2.33 
  -5   1  16  221.38    2.08 
  -5   1  16  225.98    2.33 
   5  -1 -16  226.83    2.08 
   5  -1 -16  219.05    2.31 
   5   1 -16  218.68    2.18 
   5   1 -16  213.41    2.25 
  -5  -1  15   81.07    1.39 
  -5  -1  15   82.09    1.42 
  -5   1  15   81.19    1.27 
  -5   1  15   78.57    1.37 
   5  -1 -15   81.17    1.25 
   5  -1 -15   79.15    1.37 
   5   1 -15   78.57    1.33 
  -5  -1  14    4.83    0.50 
  -5  -1  14    4.97    0.51 
  -5   1  14    4.84    0.46 
  -5   1  14    4.34    0.44 
   5  -1 -14    4.67    0.43 
   5  -1 -14    4.85    0.47 
  -5  -1  13    1.69    0.33 
  -5  -1  13    1.01    0.28 
  -5   1  13    1.41    0.29 
  -5   1  13    1.41    0.33 
   5  -1 -13    1.38    0.28 
  -5  -1  12   61.09    1.09 
  -5  -1  12   63.85    1.12 
  -5   1  12   62.79    1.03 
  -5   1  12   62.12    1.10 
   5  -1 -12   64.08    1.04 
  -5  -1  11  100.58    1.33 
  -5  -1  11  106.04    1.57 
  -5   1  11   98.70    1.24 
   5  -1 -11  105.79    1.53 
  -5  -1  10    2.97    0.35 
  -5   1  10    2.19    0.29 
  -5  -1   9   32.57    0.75 
  -5   1   9   31.76    0.71 
   5  -1  -9   31.97    0.63 
  -5  -1   8   51.13    0.88 
  -5   1   8   51.13    0.85 
   5  -1  -8   50.80    0.75 
  -5  -1   7    1.23    0.27 
  -5   1   7    1.00    0.23 
   5  -1  -7    0.89    0.21 
  -5  -1   6   18.65    0.57 
  -5   1   6   18.32    0.54 
   5  -1  -6   18.12    0.49 
  -5  -1   5    1.14    0.24 
   5  -1  -5    1.08    0.22 
  -5  -1   4   34.59    0.63 
  -5   1   4   32.90    0.65 
   5  -1  -4   34.53    0.63 
  -5  -1   3  113.88    1.02 
  -5   1   3  110.59    1.10 
   5  -1  -3  113.59    1.07 
  -5  -1   2   13.19    0.39 
   5  -1  -2   13.88    0.47 
  -5  -1   1   45.78    0.60 
   5  -1  -1   44.81    0.73 
  -5  -1   0    9.62    0.33 
  -5   1   0    9.23    0.39 
   5  -1   0    9.12    0.43 
  -5  -1  -1   24.56    0.41 
  -5   1  -1   24.65    0.58 
   5  -1   1   25.14    0.61 
  -5  -1  -2    1.35    0.15 
  -5   1  -2    1.06    0.21 
   5  -1   2    1.11    0.24 
  -5   1  -3    6.80    0.38 
   5  -1   3    7.15    0.41 
  -5   1  -4   18.86    0.54 
   5  -1   4   19.72    0.61 
  -5  -1  -5   62.13    0.65 
  -5   1  -5   60.34    0.91 
   5  -1   5   63.47    1.01 
  -5  -1  -6   67.61    0.67 
  -5   1  -6   65.20    0.96 
   5  -1   6   66.83    1.06 
  -5  -1  -7   65.31    0.66 
  -5   1  -7   64.50    0.98 
   5  -1   7   67.40    1.10 
   5  -1   7   68.21    1.08 
  -5  -1  -8    4.37    0.25 
  -5   1  -8    3.96    0.38 
   5  -1   8    4.87    0.46 
   5  -1   8    4.71    0.47 
  -5   1  -9   32.57    0.76 
   5  -1   9   34.77    0.89 
   5   1   9   33.65    1.08 
  -5   1 -10   49.09    0.93 
   5  -1  10   51.48    1.10 
   5   1  10   50.40    1.09 
  -5  -1 -11   60.27    1.25 
  -5   1 -11   59.22    1.04 
  -5   1 -11   60.85    1.07 
  -5   1 -11   58.41    1.20 
   5  -1  11   59.52    1.03 
   5  -1  11   63.04    1.25 
   5  -1  11   61.28    1.09 
   5  -1  11   61.50    1.21 
   5   1  11   61.69    1.26 
  -5  -1 -12    1.99    0.37 
  -5  -1 -12    1.92    0.40 
  -5   1 -12    1.90    0.33 
  -5   1 -12    1.85    0.33 
  -5   1 -12    1.90    0.38 
   5  -1  12    1.52    0.32 
   5  -1  12    1.89    0.43 
   5  -1  12    1.51    0.34 
   5  -1  12    2.41    0.42 
   5   1  12    2.16    0.42 
  -5  -1 -13    2.28    0.41 
  -5  -1 -13    2.94    0.40 
  -5  -1 -13    2.89    0.48 
  -5   1 -13    1.73    0.36 
  -5   1 -13    2.42    0.37 
  -5   1 -13    2.57    0.38 
  -5   1 -13    2.16    0.41 
   5  -1  13    2.55    0.37 
   5  -1  13    2.79    0.48 
   5  -1  13    2.24    0.39 
   5  -1  13    2.27    0.42 
   5   1  13    2.45    0.45 
  -5  -1 -14   12.66    0.69 
  -5  -1 -14   13.37    0.67 
  -5  -1 -14   12.94    0.77 
  -5   1 -14   11.55    0.68 
  -5   1 -14   12.68    0.63 
  -5   1 -14   12.74    0.66 
  -5   1 -14   12.26    0.75 
   5  -1  14   12.65    0.72 
   5  -1  14   13.00    0.79 
   5  -1  14   13.33    0.70 
   5  -1  14   14.14    0.77 
   5   1  14   12.67    0.78 
  -5  -1 -15    3.24    0.48 
  -5  -1 -15    3.48    0.46 
  -5  -1 -15    3.15    0.49 
  -5   1 -15    3.36    0.50 
  -5   1 -15    3.55    0.45 
  -5   1 -15    3.28    0.51 
   5  -1  15    3.76    0.56 
   5  -1  15    3.67    0.48 
   5  -1  15    3.75    0.52 
   5   1  15    3.83    0.54 
  -5  -1 -16    0.30    0.37 
  -5  -1 -16    0.98    0.35 
  -5  -1 -16    0.87    0.41 
  -5   1 -16    0.80    0.38 
  -5   1 -16    0.75    0.40 
   5  -1  16    0.66    0.44 
   5  -1  16    0.51    0.52 
   5  -1  16    0.97    0.42 
   5   1  16    0.89    0.44 
  -5  -1 -17   -0.04    0.37 
  -5  -1 -17    0.11    0.32 
  -5  -1 -17    0.11    0.39 
  -5   1 -17    0.63    0.38 
  -5   1 -17    0.15    0.39 
   5  -1  17    0.07    0.44 
   5  -1  17   -0.15    0.39 
   5   1  17   -0.08    0.39 
  -5  -1 -18   11.86    0.79 
  -5  -1 -18   12.75    0.76 
  -5  -1 -18   12.15    0.90 
  -5   1 -18   12.49    0.85 
  -5   1 -18   12.66    0.90 
   5  -1  18   14.63    0.88 
   5   1  18   12.78    0.91 
  -5  -1 -19    1.97    0.51 
  -5  -1 -19    1.56    0.51 
  -5   1 -19    1.93    0.51 
  -5   1 -19    1.63    0.53 
   5  -1  19    2.58    0.55 
   5   1  19    1.82    0.53 
  -5  -1 -20   28.86    1.24 
  -5  -1 -20   29.15    1.29 
  -5   1 -20   27.92    1.22 
  -5   1 -20   29.01    1.28 
   5  -1  20   30.27    1.22 
   5   1  20   32.85    1.33 
  -5  -2  24    1.09    0.50 
  -5  -2  24    1.51    0.59 
  -5   2  24    1.42    0.51 
   5  -2 -24    1.01    0.49 
   5  -2 -24    1.61    0.51 
   5  -2 -24    1.42    0.47 
   5   2 -24    1.23    0.44 
   5   2 -24    2.04    0.59 
  -5  -2  23   -0.22    0.38 
  -5  -2  23    0.63    0.52 
  -5   2  23    0.01    0.38 
   5  -2 -23    0.02    0.42 
   5  -2 -23   -0.07    0.35 
   5  -2 -23    0.00    0.36 
   5   2 -23    0.21    0.36 
   5   2 -23    0.24    0.45 
   5   2 -23    0.02    0.60 
  -5  -2  22    3.88    0.61 
  -5  -2  22    4.85    0.71 
  -5   2  22    3.61    0.57 
   5  -2 -22    3.90    0.56 
   5  -2 -22    3.72    0.59 
   5  -2 -22    4.03    0.56 
   5  -2 -22    3.78    0.55 
   5   2 -22    4.33    0.55 
   5   2 -22    3.60    0.52 
   5   2 -22    3.59    0.59 
   5   2 -22    4.14    0.58 
  -5  -2  21    2.53    0.54 
  -5  -2  21    2.57    0.57 
  -5   2  21    2.39    0.50 
   5  -2 -21    2.30    0.48 
   5  -2 -21    2.10    0.46 
   5  -2 -21    2.61    0.48 
   5  -2 -21    1.97    0.45 
   5   2 -21    2.50    0.45 
   5   2 -21    2.72    0.46 
   5   2 -21    2.48    0.53 
   5   2 -21    2.78    0.51 
  -5  -2  20    0.49    0.41 
  -5  -2  20    0.00    0.42 
  -5   2  20    0.32    0.37 
   5  -2 -20    0.52    0.37 
   5  -2 -20    0.49    0.36 
   5  -2 -20    0.98    0.39 
   5  -2 -20    0.44    0.36 
   5   2 -20    0.49    0.33 
   5   2 -20    0.43    0.33 
   5   2 -20    0.36    0.41 
   5   2 -20    0.67    0.40 
  -5  -2  19    1.79    0.47 
  -5  -2  19    1.27    0.42 
  -5   2  19    1.43    0.42 
   5  -2 -19    1.16    0.40 
   5  -2 -19    1.56    0.39 
   5  -2 -19    1.42    0.52 
   5  -2 -19    1.71    0.42 
   5   2 -19    1.70    0.39 
   5   2 -19    1.47    0.38 
   5   2 -19    1.19    0.40 
   5   2 -19    1.50    0.43 
  -5  -2  18    3.35    0.54 
  -5  -2  18    3.61    0.55 
  -5   2  18    3.57    0.43 
  -5   2  18    3.07    0.47 
   5  -2 -18    3.43    0.48 
   5  -2 -18    3.45    0.51 
   5  -2 -18    3.19    0.47 
   5   2 -18    3.23    0.43 
   5   2 -18    2.45    0.46 
   5   2 -18    3.24    0.50 
  -5  -2  17   31.90    1.06 
  -5  -2  17   32.17    1.10 
  -5   2  17   31.03    0.87 
  -5   2  17   30.89    1.00 
   5  -2 -17   31.89    0.98 
   5  -2 -17   31.94    1.04 
   5  -2 -17   30.13    0.98 
   5   2 -17   31.43    0.91 
   5   2 -17   29.87    1.02 
   5   2 -17   32.82    1.03 
  -5  -2  16    8.94    0.71 
  -5  -2  16    8.56    0.66 
  -5  -2  16    9.63    0.72 
  -5   2  16    8.83    0.56 
  -5   2  16    8.93    0.63 
   5  -2 -16    8.76    0.62 
   5  -2 -16    8.15    0.59 
   5   2 -16    8.99    0.58 
   5   2 -16    8.45    0.65 
  -5  -2  15   10.94    0.71 
  -5  -2  15   10.77    0.64 
  -5  -2  15   11.58    0.71 
  -5   2  15   10.52    0.57 
  -5   2  15   10.78    0.63 
   5  -2 -15   10.53    0.64 
   5  -2 -15   11.43    0.67 
   5   2 -15   11.22    0.60 
   5   2 -15   10.56    0.66 
  -5  -2  14    0.37    0.32 
  -5  -2  14    0.61    0.29 
  -5  -2  14    0.80    0.36 
  -5   2  14    0.68    0.27 
  -5   2  14    0.29    0.27 
   5  -2 -14    0.49    0.30 
   5  -2 -14    0.31    0.29 
   5   2 -14    0.43    0.31 
  -5  -2  13   26.15    0.86 
  -5  -2  13   27.99    0.80 
  -5  -2  13   28.23    0.89 
  -5   2  13   26.70    0.75 
  -5   2  13   28.29    0.85 
   5  -2 -13   27.04    0.82 
   5  -2 -13   26.73    0.81 
  -5  -2  12    9.96    0.59 
  -5  -2  12    9.47    0.52 
  -5  -2  12    9.90    0.60 
  -5   2  12   10.10    0.51 
  -5   2  12    9.57    0.55 
   5  -2 -12    9.52    0.55 
   5  -2 -12   10.72    0.85 
   5   2 -12    9.78    0.55 
  -5  -2  11    9.03    0.56 
  -5  -2  11   10.32    0.50 
  -5  -2  11    9.84    0.58 
  -5   2  11    9.39    0.50 
  -5   2  11   10.57    0.55 
   5  -2 -11    9.64    0.55 
   5   2 -11    9.82    0.56 
  -5  -2  10   22.35    0.73 
  -5  -2  10   22.93    0.72 
  -5   2  10   21.38    0.65 
  -5   2  10   22.12    0.69 
   5  -2 -10   23.21    0.72 
   5   2 -10   22.16    0.70 
  -5  -2   9    3.09    0.36 
  -5   2   9    3.08    0.36 
  -5   2   9    3.05    0.37 
   5  -2  -9    2.92    0.36 
  -5  -2   8   12.29    0.54 
  -5   2   8   11.05    0.49 
   5  -2  -8   11.81    0.52 
   5  -2  -8   11.65    0.51 
  -5  -2   7    3.57    0.41 
   5  -2  -7    4.18    0.39 
   5  -2  -7    4.06    0.41 
  -5  -2   6   17.89    0.58 
   5  -2  -6   18.12    0.59 
  -5  -2   5   71.75    0.99 
  -5   2   5   67.42    0.94 
   5  -2  -5   69.96    1.02 
  -5  -2   4    8.76    0.43 
  -5   2   4    8.52    0.43 
   5  -2  -4    8.78    0.47 
  -5  -2   3    2.01    0.25 
  -5   2   3    1.97    0.28 
   5  -2  -3    2.12    0.30 
  -5  -2   2   99.48    0.99 
  -5   2   2   94.36    1.14 
   5  -2  -2   97.82    1.18 
  -5  -2   1  172.41    1.22 
  -5   2   1  164.45    1.50 
   5  -2  -1  171.92    1.54 
  -5  -2   0   38.81    0.57 
  -5   2   0   37.18    0.77 
   5  -2   0   38.28    0.79 
  -5  -2  -1    1.34    0.17 
  -5   2  -1    1.13    0.23 
   5  -2   1    1.61    0.30 
  -5  -2  -2   24.33    0.39 
   5  -2   2   24.39    0.67 
  -5  -2  -3   45.53    0.44 
  -5   2  -3   44.08    0.87 
   5  -2   3   44.37    0.87 
  -5   2  -4    3.20    0.39 
   5  -2   4    4.11    0.42 
   5  -2   4    3.89    0.39 
  -5   2  -5   23.06    0.69 
   5  -2   5   24.57    0.73 
   5  -2   5   25.40    0.74 
  -5   2  -6   10.70    0.54 
   5  -2   6   10.62    0.55 
   5  -2   6   11.32    0.60 
  -5   2  -7    0.26    0.24 
  -5   2  -7    0.29    0.24 
   5  -2   7    0.65    0.29 
   5  -2   7    0.25    0.28 
  -5   2  -8  125.08    1.58 
  -5   2  -8  129.50    1.55 
   5  -2   8  131.64    1.61 
   5  -2   8  130.56    1.67 
   5   2   8  126.11    1.67 
  -5  -2  -9   26.79    0.89 
  -5   2  -9   26.50    0.81 
  -5   2  -9   26.96    0.80 
   5  -2   9   28.13    0.86 
   5  -2   9   26.92    0.89 
   5   2   9   27.79    0.87 
  -5  -2 -10  222.81    2.32 
  -5   2 -10  210.17    2.12 
  -5   2 -10  223.30    2.14 
   5  -2  10  220.07    2.16 
   5  -2  10  224.55    2.33 
   5  -2  10  227.80    2.20 
   5   2  10  224.52    2.35 
  -5  -2 -11    5.53    0.59 
  -5   2 -11    5.89    0.54 
  -5   2 -11    5.24    0.51 
  -5   2 -11    5.97    0.55 
   5  -2  11    6.07    0.59 
   5  -2  11    5.81    0.65 
   5  -2  11    5.11    0.57 
   5   2  11    4.89    0.54 
  -5  -2 -12    0.53    0.36 
  -5   2 -12    0.62    0.31 
  -5   2 -12    0.89    0.34 
  -5   2 -12    1.13    0.34 
  -5   2 -12    1.03    0.36 
  -5   2 -12    0.83    0.41 
   5  -2  12    1.39    0.38 
   5  -2  12    1.08    0.43 
   5  -2  12    0.84    0.35 
   5   2  12    0.63    0.38 
  -5  -2 -13    0.03    0.31 
  -5   2 -13    0.11    0.29 
  -5   2 -13    0.54    0.34 
  -5   2 -13    0.58    0.33 
  -5   2 -13   -0.09    0.30 
  -5   2 -13    0.12    0.32 
   5  -2  13    0.32    0.34 
   5  -2  13    0.19    0.39 
   5  -2  13    0.38    0.33 
   5  -2  13    0.19    0.33 
   5   2  13    0.23    0.36 
  -5  -2 -14   40.92    1.15 
  -5  -2 -14   39.38    1.20 
  -5   2 -14   38.60    1.16 
  -5   2 -14   41.04    1.10 
  -5   2 -14   41.15    1.12 
  -5   2 -14   39.67    1.17 
  -5   2 -14   38.54    1.10 
   5  -2  14   39.70    1.10 
   5  -2  14   41.82    1.28 
   5  -2  14   41.75    1.14 
   5  -2  14   41.67    1.15 
   5   2  14   38.81    1.21 
  -5  -2 -15   10.60    0.72 
  -5  -2 -15   10.38    0.78 
  -5   2 -15    9.43    0.70 
  -5   2 -15   10.69    0.73 
  -5   2 -15    9.73    0.74 
  -5   2 -15   10.54    0.71 
   5  -2  15   10.53    0.74 
   5  -2  15   10.94    0.87 
   5  -2  15   10.52    0.78 
   5  -2  15   11.13    0.79 
   5   2  15    9.75    0.79 
  -5  -2 -16   71.68    1.56 
  -5  -2 -16   72.05    1.66 
  -5   2 -16   65.20    1.56 
  -5   2 -16   73.54    1.53 
  -5   2 -16   68.08    1.59 
  -5   2 -16   72.65    1.52 
   5  -2  16   68.56    1.64 
   5  -2  16   73.19    1.72 
   5  -2  16   71.97    1.53 
   5  -2  16   75.17    1.56 
   5   2  16   70.47    1.65 
  -5  -2 -17    0.24    0.36 
  -5  -2 -17    0.11    0.37 
  -5   2 -17    0.15    0.32 
  -5   2 -17    0.26    0.38 
  -5   2 -17    0.02    0.39 
  -5   2 -17   -0.02    0.37 
   5  -2  17   -0.35    0.45 
   5  -2  17    0.05    0.43 
   5  -2  17    0.27    0.41 
   5   2  17   -0.18    0.43 
  -5  -2 -18   33.98    1.19 
  -5  -2 -18   34.94    1.31 
  -5   2 -18   32.97    1.24 
  -5   2 -18   36.42    1.21 
  -5   2 -18   34.30    1.28 
   5  -2  18   36.40    1.39 
   5  -2  18   36.12    1.27 
   5  -2  18   35.35    1.38 
   5   2  18   33.25    1.33 
  -5  -2 -19    4.18    0.64 
  -5  -2 -19    4.58    0.62 
  -5  -2 -19    4.87    0.68 
  -5   2 -19    4.10    0.63 
  -5   2 -19    4.26    0.61 
  -5   2 -19    3.59    0.61 
   5  -2  19    4.59    0.74 
   5  -2  19    4.86    0.66 
   5   2  19    4.89    0.73 
  -5  -3  23    0.17    0.50 
  -5  -3  22    4.45    0.69 
  -5  -3  22    4.12    0.69 
  -5   3  22    5.13    0.65 
   5  -3 -22    4.90    0.67 
   5  -3 -22    4.89    0.70 
   5  -3 -22    4.33    0.64 
   5   3 -22    4.22    0.67 
   5   3 -22    4.98    0.67 
  -5  -3  21    0.44    0.49 
  -5  -3  21    0.17    0.47 
  -5   3  21    0.06    0.39 
   5  -3 -21    0.44    0.43 
   5  -3 -21   -0.43    0.39 
   5  -3 -21   -0.24    0.35 
   5   3 -21   -0.26    0.43 
   5   3 -21   -0.04    0.42 
  -5  -3  20    1.02    0.48 
  -5  -3  20    0.36    0.44 
  -5  -3  20    0.55    0.50 
  -5   3  20    0.77    0.41 
   5  -3 -20    0.38    0.42 
   5  -3 -20    0.56    0.38 
   5  -3 -20    0.87    0.41 
   5   3 -20    0.89    0.44 
   5   3 -20    1.14    0.45 
  -5  -3  19   16.33    0.97 
  -5  -3  19   17.03    0.93 
  -5  -3  19   15.82    1.00 
  -5   3  19   16.25    0.90 
   5  -3 -19   15.76    0.93 
   5  -3 -19   15.74    0.91 
   5  -3 -19   14.81    0.85 
   5   3 -19   15.32    0.92 
   5   3 -19   17.10    0.92 
  -5  -3  18    2.25    0.52 
  -5  -3  18    2.36    0.50 
  -5  -3  18    2.11    0.54 
  -5   3  18    1.90    0.42 
  -5   3  18    1.97    0.44 
   5  -3 -18    1.85    0.48 
   5  -3 -18    2.05    0.47 
   5  -3 -18    1.65    0.42 
   5   3 -18    1.50    0.46 
   5   3 -18    2.46    0.51 
  -5  -3  17    0.65    0.43 
  -5  -3  17    0.91    0.41 
  -5  -3  17    0.99    0.45 
  -5   3  17    0.63    0.38 
  -5   3  17    0.99    0.38 
   5  -3 -17    0.79    0.40 
   5  -3 -17    1.40    0.42 
   5  -3 -17    0.34    0.32 
   5   3 -17    1.23    0.35 
   5   3 -17    0.70    0.41 
   5   3 -17    0.81    0.42 
  -5  -3  16   17.18    0.91 
  -5  -3  16   17.50    0.84 
  -5  -3  16   17.17    0.90 
  -5   3  16   16.59    0.76 
  -5   3  16   16.82    0.83 
   5  -3 -16   16.09    0.83 
   5  -3 -16   16.32    0.79 
   5  -3 -16   16.75    0.82 
   5   3 -16   17.29    0.89 
   5   3 -16   17.38    0.73 
   5   3 -16   16.65    0.87 
   5   3 -16   17.62    0.87 
  -5  -3  15   23.33    0.96 
  -5  -3  15   23.56    0.88 
  -5  -3  15   21.58    0.95 
  -5   3  15   21.06    0.85 
   5  -3 -15   22.02    0.90 
   5  -3 -15   21.20    0.88 
   5  -3 -15   21.11    0.86 
   5   3 -15   22.34    0.94 
   5   3 -15   22.07    0.78 
   5   3 -15   21.64    0.92 
   5   3 -15   23.51    0.94 
  -5  -3  14    5.09    0.62 
  -5  -3  14    5.59    0.56 
  -5  -3  14    5.79    0.64 
  -5   3  14    5.37    0.55 
   5  -3 -14    5.02    0.60 
   5  -3 -14    4.98    0.56 
   5  -3 -14    4.64    0.52 
   5   3 -14    5.76    0.63 
   5   3 -14    4.65    0.48 
   5   3 -14    5.09    0.61 
   5   3 -14    5.28    0.62 
  -5  -3  13    0.38    0.34 
  -5  -3  13    0.71    0.32 
  -5  -3  13    0.56    0.35 
  -5   3  13    0.07    0.36 
  -5   3  13    0.56    0.31 
   5  -3 -13    0.22    0.29 
   5  -3 -13    0.31    0.29 
   5   3 -13    0.13    0.32 
   5   3 -13    0.44    0.34 
   5   3 -13    0.52    0.32 
  -5  -3  12    0.92    0.36 
  -5  -3  12    1.08    0.32 
  -5  -3  12    0.72    0.34 
  -5   3  12    0.99    0.24 
  -5   3  12    0.59    0.28 
   5  -3 -12    0.95    0.32 
   5  -3 -12    1.21    0.35 
   5   3 -12    1.17    0.36 
   5   3 -12    0.61    0.32 
  -5  -3  11    0.65    0.33 
  -5  -3  11    0.94    0.29 
  -5  -3  11    1.02    0.35 
  -5   3  11    0.97    0.24 
  -5   3  11    0.68    0.29 
   5  -3 -11    0.98    0.34 
   5  -3 -11    0.54    0.31 
   5   3 -11    1.02    0.34 
   5   3 -11    0.93    0.36 
  -5  -3  10    0.09    0.29 
  -5  -3  10    0.54    0.25 
  -5  -3  10    0.69    0.30 
  -5   3  10    0.24    0.21 
  -5   3  10    0.38    0.28 
   5  -3 -10    0.25    0.29 
   5   3 -10    0.20    0.27 
  -5  -3   9    2.01    0.35 
  -5  -3   9    3.25    0.39 
  -5  -3   9    2.82    0.39 
  -5   3   9    2.78    0.31 
  -5   3   9    2.90    0.39 
   5  -3  -9    2.24    0.38 
   5   3  -9    3.08    0.39 
  -5  -3   8    1.65    0.33 
  -5  -3   8    1.87    0.32 
  -5   3   8    2.28    0.29 
  -5   3   8    1.78    0.31 
   5  -3  -8    1.98    0.35 
   5  -3  -8    1.56    0.32 
   5   3  -8    1.43    0.31 
  -5  -3   7    0.15    0.24 
  -5   3   7    0.23    0.21 
  -5   3   7    0.00    0.23 
   5  -3  -7    0.05    0.26 
   5  -3  -7    0.14    0.23 
  -5  -3   6    2.53    0.33 
  -5   3   6    2.67    0.31 
  -5   3   6    3.05    0.38 
   5  -3  -6    1.96    0.33 
   5  -3  -6    2.98    0.39 
  -5  -3   5    2.51    0.33 
  -5   3   5    2.20    0.29 
  -5   3   5    2.46    0.33 
   5  -3  -5    1.79    0.31 
   5  -3  -5    2.87    0.38 
  -5  -3   4    1.79    0.28 
  -5   3   4    1.65    0.29 
  -5   3   4    1.33    0.31 
   5  -3  -4    1.74    0.33 
   5  -3  -4    1.27    0.29 
  -5  -3   3    3.42    0.36 
  -5   3   3    3.36    0.40 
  -5   3   3    3.76    0.43 
   5  -3  -3    3.75    0.41 
   5  -3  -3    3.59    0.41 
  -5  -3   2   -0.08    0.18 
  -5   3   2    0.02    0.22 
  -5   3   2    0.00    0.21 
   5  -3  -2   -0.05    0.25 
   5  -3  -2   -0.10    0.22 
  -5  -3   1    1.66    0.24 
  -5   3   1    1.16    0.28 
  -5   3   1    1.20    0.30 
   5  -3  -1    0.88    0.30 
  -5  -3   0  105.55    1.06 
  -5   3   0   98.30    1.35 
  -5   3   0  101.36    1.38 
   5  -3   0  105.41    1.40 
  -5  -3  -1   36.33    0.62 
  -5   3  -1   33.76    0.86 
  -5   3  -1   35.03    0.87 
   5  -3   1   35.86    0.87 
  -5  -3  -2   10.14    0.36 
  -5   3  -2   10.05    0.57 
  -5   3  -2   10.25    0.57 
   5  -3   2   10.06    0.57 
  -5  -3  -3    3.49    0.25 
  -5   3  -3    3.85    0.43 
  -5   3  -3    3.66    0.45 
   5  -3   3    4.19    0.46 
  -5  -3  -4    0.45    0.19 
  -5   3  -4    0.72    0.30 
  -5   3  -4    0.82    0.31 
   5  -3   4    0.95    0.31 
  -5   3  -5    5.27    0.52 
  -5   3  -5    4.69    0.49 
   5  -3   5    5.65    0.51 
   5  -3   5    4.87    0.54 
   5   3   5    4.93    0.49 
  -5   3  -6   53.38    1.15 
  -5   3  -6   56.11    1.15 
   5  -3   6   56.16    1.12 
   5  -3   6   55.84    1.17 
   5   3   6   52.40    1.11 
  -5  -3  -7   23.67    0.84 
  -5   3  -7   23.18    0.84 
  -5   3  -7   23.62    0.83 
   5  -3   7   23.59    0.82 
   5  -3   7   23.41    0.88 
   5  -3   7   25.07    0.83 
   5   3   7   23.24    0.84 
  -5  -3  -8   80.24    1.42 
  -5   3  -8   76.99    1.42 
  -5   3  -8   80.68    1.43 
  -5   3  -8   77.79    1.58 
   5  -3   8   83.95    1.40 
   5  -3   8   81.69    1.48 
   5  -3   8   85.17    1.41 
   5   3   8   80.60    1.47 
  -5  -3  -9    5.93    0.59 
  -5   3  -9    5.29    0.46 
  -5   3  -9    5.21    0.58 
  -5   3  -9    4.41    0.55 
  -5   3  -9    5.66    0.60 
   5  -3   9    6.54    0.62 
   5  -3   9    5.16    0.60 
   5  -3   9    5.76    0.63 
   5   3   9    5.27    0.60 
  -5  -3 -10   83.76    1.54 
  -5   3 -10   79.23    1.51 
  -5   3 -10   81.70    1.52 
  -5   3 -10   83.24    1.51 
  -5   3 -10   83.48    1.41 
  -5   3 -10   82.87    1.55 
   5  -3  10   84.92    1.45 
   5  -3  10   84.93    1.62 
   5  -3  10   88.00    1.49 
   5   3  10   77.13    1.51 
   5   3  10   70.09    1.41 
  -5  -3 -11  106.99    1.78 
  -5   3 -11  100.11    1.74 
  -5   3 -11  106.56    1.77 
  -5   3 -11  104.88    1.72 
  -5   3 -11  103.02    1.62 
  -5   3 -11  102.94    1.74 
   5  -3  11  111.02    1.67 
   5  -3  11  107.27    1.83 
   5  -3  11  109.94    1.68 
   5   3  11  106.77    1.83 
   5   3  11   92.26    1.64 
  -5  -3 -12    4.90    0.56 
  -5   3 -12    5.34    0.51 
  -5   3 -12    4.82    0.56 
  -5   3 -12    5.33    0.62 
  -5   3 -12    5.23    0.57 
  -5   3 -12    5.04    0.62 
   5  -3  12    5.09    0.58 
   5  -3  12    4.97    0.58 
   5  -3  12    5.13    0.62 
   5  -3  12    4.79    0.53 
   5   3  12    5.00    0.62 
   5   3  12    4.45    0.55 
  -5  -3 -13    2.28    0.48 
  -5   3 -13    2.75    0.46 
  -5   3 -13    2.30    0.48 
  -5   3 -13    2.94    0.50 
  -5   3 -13    2.97    0.47 
  -5   3 -13    2.07    0.46 
   5  -3  13    2.75    0.50 
   5  -3  13    2.70    0.46 
   5  -3  13    2.19    0.55 
   5  -3  13    2.63    0.47 
   5   3  13    2.21    0.52 
  -5  -3 -14   19.58    0.96 
  -5  -3 -14   19.72    0.96 
  -5   3 -14   18.96    0.94 
  -5   3 -14   20.22    0.94 
  -5   3 -14   19.32    0.90 
  -5   3 -14   19.66    0.93 
   5  -3  14   20.39    0.98 
   5  -3  14   20.92    1.07 
   5  -3  14   20.18    0.97 
   5  -3  14   19.83    0.92 
   5   3  14   18.73    1.01 
  -5  -3 -15   46.67    1.37 
  -5  -3 -15   47.34    1.39 
  -5   3 -15   43.65    1.33 
  -5   3 -15   46.63    1.33 
  -5   3 -15   45.32    1.31 
  -5   3 -15   46.52    1.34 
   5  -3  15   45.99    1.33 
   5  -3  15   48.86    1.50 
   5  -3  15   48.35    1.38 
   5  -3  15   50.51    1.31 
   5   3  15   46.92    1.45 
  -5  -3 -16    0.59    0.43 
  -5  -3 -16    0.52    0.43 
  -5   3 -16    0.36    0.33 
  -5   3 -16    0.43    0.41 
  -5   3 -16    0.18    0.38 
  -5   3 -16    0.22    0.41 
   5  -3  16    0.68    0.45 
   5  -3  16    0.56    0.54 
   5  -3  16    0.38    0.46 
   5   3  16    0.85    0.50 
  -5  -3 -17    1.52    0.49 
  -5  -3 -17    1.01    0.46 
  -5   3 -17    0.64    0.42 
  -5   3 -17    0.84    0.45 
  -5   3 -17    0.47    0.42 
  -5   3 -17    0.94    0.46 
   5  -3  17    0.60    0.47 
   5  -3  17    0.75    0.57 
   5  -3  17    0.57    0.47 
   5   3  17    1.03    0.53 
  -5  -3 -18   17.99    1.02 
  -5  -3 -18   17.15    1.03 
  -5   3 -18   16.87    1.00 
  -5   3 -18   18.19    1.03 
  -5   3 -18   16.60    1.00 
  -5   3 -18   17.57    1.03 
   5  -3  18   18.03    1.17 
   5  -3  18   18.22    1.13 
   5   3  18   16.85    1.11 
  -5  -4  21    5.76    0.79 
  -5  -4  21    5.79    0.73 
  -5  -4  21    6.12    0.80 
  -5   4  21    6.48    0.80 
   5  -4 -21    6.63    0.79 
   5  -4 -21    5.69    0.75 
   5  -4 -21    5.74    0.75 
   5   4 -21    4.89    0.71 
   5   4 -21    5.31    0.72 
  -5  -4  20   13.52    1.02 
  -5  -4  20   13.82    0.96 
  -5  -4  20   14.63    1.09 
  -5   4  20   12.27    0.88 
  -5   4  20   13.78    0.93 
   5  -4 -20   15.06    1.05 
   5  -4 -20   13.94    0.97 
   5  -4 -20   13.14    0.91 
   5   4 -20   14.46    1.06 
   5   4 -20   13.68    0.98 
  -5  -4  19    2.22    0.60 
  -5  -4  19    3.64    0.59 
  -5  -4  19    3.09    0.64 
  -5   4  19    3.18    0.59 
  -5   4  19    2.80    0.53 
   5  -4 -19    3.38    0.63 
   5  -4 -19    2.79    0.55 
   5  -4 -19    3.14    0.57 
   5   4 -19    2.91    0.59 
   5   4 -19    3.20    0.61 
   5   4 -19    3.32    0.63 
  -5  -4  18    2.32    0.60 
  -5  -4  18    1.98    0.53 
  -5  -4  18    2.02    0.56 
  -5   4  18    2.06    0.49 
  -5   4  18    1.94    0.48 
   5  -4 -18    2.11    0.54 
   5  -4 -18    2.22    0.51 
   5  -4 -18    1.99    0.50 
   5   4 -18    2.28    0.57 
   5   4 -18    2.35    0.57 
   5   4 -18    2.13    0.53 
  -5  -4  17    0.10    0.43 
  -5  -4  17    0.15    0.40 
  -5  -4  17    0.16    0.47 
  -5   4  17   -0.10    0.38 
  -5   4  17    0.22    0.37 
   5  -4 -17   -0.20    0.40 
   5  -4 -17   -0.21    0.38 
   5  -4 -17   -0.01    0.38 
   5   4 -17    0.06    0.44 
   5   4 -17   -0.01    0.42 
   5   4 -17    0.03    0.42 
  -5  -4  16   42.76    1.36 
  -5  -4  16   45.93    1.29 
  -5  -4  16   42.73    1.35 
  -5   4  16   40.48    1.26 
  -5   4  16   42.02    1.25 
   5  -4 -16   43.55    1.35 
   5  -4 -16   44.58    1.33 
   5  -4 -16   38.60    1.24 
   5   4 -16   42.92    1.34 
   5   4 -16   42.50    1.34 
   5   4 -16   42.24    1.33 
  -5  -4  15   23.99    1.07 
  -5  -4  15   26.24    0.99 
  -5  -4  15   23.67    1.05 
  -5   4  15   22.61    0.97 
  -5   4  15   23.21    0.95 
   5  -4 -15   24.09    1.06 
   5  -4 -15   24.21    1.00 
   5  -4 -15   22.39    0.96 
   5   4 -15   23.08    1.03 
   5   4 -15   23.32    1.04 
   5   4 -15   23.90    1.05 
  -5  -4  14   48.21    1.35 
  -5  -4  14   53.80    1.27 
  -5  -4  14   50.61    1.36 
  -5   4  14   47.34    1.28 
  -5   4  14   49.58    1.27 
   5  -4 -14   50.11    1.37 
   5  -4 -14   49.73    1.30 
   5  -4 -14   45.83    1.26 
   5   4 -14   51.86    1.36 
   5   4 -14   46.91    1.31 
   5   4 -14   46.76    1.29 
  -5  -4  13    1.28    0.44 
  -5  -4  13    1.75    0.40 
  -5  -4  13    1.17    0.41 
  -5   4  13    1.20    0.40 
  -5   4  13    1.59    0.41 
   5  -4 -13    1.41    0.44 
   5  -4 -13    1.83    0.43 
   5  -4 -13    1.40    0.41 
   5   4 -13    1.54    0.42 
   5   4 -13    1.39    0.44 
   5   4 -13    1.37    0.46 
  -5  -4  12   22.85    0.98 
  -5  -4  12   24.25    0.85 
  -5  -4  12   23.28    0.93 
  -5   4  12   20.01    0.82 
  -5   4  12   22.84    0.89 
   5  -4 -12   22.34    0.95 
   5  -4 -12   22.17    0.87 
   5  -4 -12   20.77    0.85 
   5   4 -12   22.54    0.92 
   5   4 -12   22.63    0.95 
   5   4 -12   22.42    0.95 
  -5  -4  11    4.37    0.53 
  -5  -4  11    5.69    0.53 
  -5  -4  11    5.38    0.60 
  -5   4  11    5.00    0.56 
   5  -4 -11    5.02    0.62 
   5  -4 -11    4.82    0.54 
   5  -4 -11    4.29    0.51 
   5   4 -11    5.01    0.59 
   5   4 -11    5.23    0.63 
   5   4 -11    5.26    0.60 
  -5  -4  10    0.50    0.35 
  -5  -4  10    0.05    0.27 
  -5  -4  10   -0.09    0.31 
  -5   4  10    0.38    0.25 
  -5   4  10    0.42    0.31 
   5  -4 -10   -0.02    0.34 
   5  -4 -10    0.16    0.33 
   5  -4 -10    0.30    0.30 
   5   4 -10    0.16    0.31 
   5   4 -10    0.28    0.35 
   5   4 -10    0.11    0.36 
  -5  -4   9    8.26    0.67 
  -5  -4   9    9.09    0.56 
  -5  -4   9    8.54    0.61 
  -5   4   9    8.88    0.52 
  -5   4   9    8.80    0.64 
   5  -4  -9    8.19    0.69 
   5  -4  -9    8.20    0.61 
   5  -4  -9    8.19    0.56 
   5   4  -9    8.85    0.62 
   5   4  -9    8.87    0.68 
   5   4  -9    9.40    0.68 
  -5  -4   8    1.46    0.38 
  -5  -4   8    1.15    0.30 
  -5  -4   8    1.27    0.33 
  -5   4   8    1.24    0.30 
  -5   4   8    1.31    0.38 
   5  -4  -8    1.41    0.40 
   5  -4  -8    0.93    0.35 
   5  -4  -8    0.93    0.31 
   5   4  -8    1.35    0.35 
   5   4  -8    1.06    0.38 
  -5  -4   7   11.40    0.65 
  -5  -4   7   12.00    0.56 
  -5   4   7   11.67    0.59 
  -5   4   7   12.01    0.67 
   5  -4  -7   11.40    0.71 
   5  -4  -7   11.64    0.69 
   5   4  -7   11.58    0.64 
   5   4  -7   11.67    0.70 
  -5  -4   6   20.51    0.78 
  -5  -4   6   21.20    0.65 
  -5   4   6   19.67    0.71 
  -5   4   6   20.92    0.81 
   5  -4  -6   21.67    0.86 
   5  -4  -6   21.93    0.83 
   5   4  -6   22.10    0.75 
   5   4  -6   20.08    0.83 
  -5  -4   5   49.15    1.04 
  -5  -4   5   52.54    0.93 
  -5   4   5   47.95    1.02 
  -5   4   5   47.95    1.12 
   5  -4  -5   49.13    1.16 
   5  -4  -5   48.55    1.10 
   5   4  -5   47.96    0.99 
  -5  -4   4   23.21    0.75 
  -5   4   4   22.83    0.76 
  -5   4   4   22.94    0.83 
   5  -4  -4   22.72    0.85 
   5  -4  -4   23.30    0.80 
   5   4  -4   22.57    0.73 
  -5  -4   3    1.79    0.31 
  -5   4   3    1.24    0.33 
  -5   4   3    1.66    0.35 
   5  -4  -3    1.85    0.40 
   5  -4  -3    1.64    0.36 
  -5  -4   2   12.59    0.56 
  -5   4   2   12.46    0.65 
  -5   4   2   12.20    0.67 
   5  -4  -2   12.79    0.69 
   5  -4  -2   12.32    0.63 
  -5  -4   1   75.70    1.11 
  -5   4   1   74.04    1.32 
  -5   4   1   73.68    1.36 
   5  -4  -1   74.14    1.35 
   5  -4  -1   75.14    1.22 
   5  -4  -1   76.83    1.37 
  -5  -4   0    6.18    0.43 
  -5   4   0    4.55    0.56 
  -5   4   0    5.62    0.52 
   5  -4   0    5.94    0.58 
   5  -4   0    6.24    0.48 
   5  -4   0    6.40    0.59 
  -5  -4  -1   10.36    0.47 
  -5   4  -1    9.76    0.64 
  -5   4  -1    9.98    0.65 
   5  -4   1    9.43    0.64 
   5  -4   1   10.74    0.55 
   5  -4   1   11.43    0.69 
  -5  -4  -2    0.45    0.21 
  -5   4  -2    0.28    0.28 
  -5   4  -2    0.16    0.33 
   5  -4   2    0.30    0.33 
   5  -4   2    0.48    0.26 
   5  -4   2    0.35    0.34 
   5   4   2    0.15    0.30 
  -5   4  -3    2.25    0.41 
  -5   4  -3    2.38    0.43 
   5  -4   3    1.98    0.41 
   5  -4   3    2.75    0.43 
   5   4   3    2.39    0.38 
  -5   4  -4    2.43    0.42 
  -5   4  -4    2.24    0.44 
  -5   4  -4    2.55    0.44 
   5  -4   4    2.52    0.44 
   5  -4   4    2.57    0.44 
   5   4   4    2.07    0.39 
  -5   4  -5   15.33    0.69 
  -5   4  -5   15.80    0.79 
  -5   4  -5   16.28    0.80 
  -5   4  -5   15.60    0.79 
   5  -4   5   16.95    0.79 
   5  -4   5   17.32    0.81 
   5   4   5   16.94    0.78 
  -5   4  -6    0.89    0.31 
  -5   4  -6    0.78    0.36 
  -5   4  -6    0.88    0.36 
  -5   4  -6    0.61    0.37 
   5  -4   6    0.94    0.37 
   5  -4   6    0.34    0.40 
   5  -4   6    0.91    0.38 
   5   4   6    1.04    0.38 
   5   4   6    0.69    0.32 
  -5  -4  -7   42.17    1.12 
  -5   4  -7   41.45    1.13 
  -5   4  -7   43.00    1.21 
  -5   4  -7   42.46    1.19 
  -5   4  -7   40.42    1.17 
   5  -4   7   43.09    1.12 
   5  -4   7   41.88    1.23 
   5  -4   7   44.91    1.14 
   5   4   7   41.98    1.17 
   5   4   7   38.58    1.11 
  -5  -4  -8    1.51    0.41 
  -5   4  -8    1.15    0.35 
  -5   4  -8    1.03    0.42 
  -5   4  -8    1.22    0.40 
  -5   4  -8    1.00    0.39 
   5  -4   8    2.36    0.44 
   5  -4   8    1.06    0.41 
   5  -4   8    1.49    0.41 
   5   4   8    1.72    0.45 
   5   4   8    1.33    0.37 
  -5  -4  -9    2.05    0.45 
  -5   4  -9    1.80    0.40 
  -5   4  -9    1.60    0.46 
  -5   4  -9    1.21    0.41 
  -5   4  -9    1.30    0.42 
   5  -4   9    1.89    0.45 
   5  -4   9    1.62    0.51 
   5  -4   9    1.61    0.42 
   5   4   9    1.32    0.42 
   5   4   9    1.12    0.43 
  -5  -4 -10    0.37    0.36 
  -5   4 -10    0.37    0.31 
  -5   4 -10   -0.09    0.39 
  -5   4 -10   -0.10    0.35 
  -5   4 -10   -0.01    0.30 
  -5   4 -10    0.08    0.38 
   5  -4  10   -0.04    0.36 
   5  -4  10    0.34    0.45 
   5  -4  10    0.28    0.38 
   5   4  10    0.31    0.39 
   5   4  10   -0.04    0.35 
  -5  -4 -11   24.03    0.99 
  -5   4 -11   22.69    0.97 
  -5   4 -11   21.95    1.03 
  -5   4 -11   23.25    1.02 
  -5   4 -11   22.90    0.90 
  -5   4 -11   21.70    1.01 
   5  -4  11   24.11    0.97 
   5  -4  11   23.26    1.11 
   5  -4  11   24.22    0.99 
   5   4  11   22.87    1.06 
   5   4  11   19.00    0.92 
  -5  -4 -12    2.55    0.51 
  -5   4 -12    1.83    0.45 
  -5   4 -12    1.77    0.52 
  -5   4 -12    1.96    0.47 
  -5   4 -12    2.09    0.45 
  -5   4 -12    2.02    0.50 
   5  -4  12    2.60    0.55 
   5  -4  12    1.96    0.47 
   5  -4  12    2.06    0.58 
   5  -4  12    2.94    0.50 
   5   4  12    1.92    0.51 
  -5  -4 -13   -0.01    0.37 
  -5   4 -13    0.48    0.39 
  -5   4 -13    0.49    0.44 
  -5   4 -13    0.15    0.40 
  -5   4 -13    0.16    0.37 
  -5   4 -13    0.23    0.41 
   5  -4  13    0.04    0.43 
   5  -4  13    0.06    0.37 
   5  -4  13    0.15    0.52 
   5  -4  13    0.06    0.40 
   5   4  13    0.38    0.45 
  -5  -4 -14   17.03    0.95 
  -5   4 -14   14.97    0.88 
  -5   4 -14   16.44    0.99 
  -5   4 -14   15.76    0.96 
  -5   4 -14   17.20    0.93 
  -5   4 -14   15.93    0.98 
   5  -4  14   16.02    0.98 
   5  -4  14   15.45    1.08 
   5   4  14   15.75    0.96 
  -5  -4 -15    3.60    0.64 
  -5  -4 -15    3.01    0.56 
  -5   4 -15    2.92    0.58 
  -5   4 -15    2.71    0.56 
  -5   4 -15    3.05    0.56 
  -5   4 -15    2.86    0.59 
   5  -4  15    3.28    0.61 
   5  -4  15    2.97    0.67 
   5  -4  15    3.05    0.61 
   5   4  15    3.28    0.64 
  -5  -4 -16    0.70    0.44 
  -5  -4 -16    1.32    0.51 
  -5   4 -16    1.13    0.49 
  -5   4 -16    0.86    0.47 
  -5   4 -16    0.73    0.46 
  -5   4 -16    0.88    0.49 
   5  -4  16    0.78    0.51 
   5  -4  16    1.32    0.62 
   5  -4  16    0.50    0.50 
   5   4  16    0.94    0.55 
  -5  -5  18    4.98    0.74 
  -5  -5  18    4.38    0.67 
  -5  -5  18    4.87    0.75 
  -5   5  18    3.95    0.66 
  -5   5  18    4.86    0.66 
   5  -5 -18    4.84    0.74 
   5  -5 -18    4.84    0.69 
   5  -5 -18    3.58    0.62 
   5   5 -18    5.24    0.77 
   5   5 -18    4.40    0.70 
   5   5 -18    4.30    0.69 
  -5  -5  17    5.99    0.75 
  -5  -5  17    6.76    0.80 
  -5  -5  17    6.85    0.80 
  -5   5  17    6.01    0.74 
  -5   5  17    6.81    0.80 
   5  -5 -17    7.75    0.90 
   5  -5 -17    6.88    0.80 
   5  -5 -17    6.20    0.74 
   5   5 -17    5.87    0.75 
   5   5 -17    7.13    0.86 
   5   5 -17    6.23    0.78 
  -5  -5  16   52.28    1.60 
  -5  -5  16   50.92    1.43 
  -5  -5  16   51.44    1.56 
  -5   5  16   44.00    1.42 
  -5   5  16   48.34    1.43 
   5  -5 -16   50.76    1.58 
   5  -5 -16   47.96    1.46 
   5  -5 -16   44.10    1.42 
   5   5 -16   49.90    1.54 
   5   5 -16   46.64    1.49 
   5   5 -16   46.42    1.47 
  -5  -5  15   25.11    1.18 
  -5  -5  15   26.62    1.11 
  -5  -5  15   26.04    1.18 
  -5   5  15   22.87    1.06 
  -5   5  15   26.71    1.12 
   5  -5 -15   25.89    1.20 
   5  -5 -15   25.35    1.11 
   5  -5 -15   22.79    1.05 
   5   5 -15   25.10    1.16 
   5   5 -15   24.98    1.14 
   5   5 -15   23.80    1.15 
  -5  -5  14    0.22    0.43 
  -5  -5  14    0.58    0.42 
  -5  -5  14    0.23    0.44 
  -5   5  14    0.34    0.40 
  -5   5  14    0.44    0.40 
   5  -5 -14    0.43    0.44 
   5  -5 -14    0.47    0.41 
   5  -5 -14    0.51    0.41 
   5   5 -14    0.58    0.43 
   5   5 -14   -0.08    0.41 
   5   5 -14    0.29    0.45 
  -5  -5  13    5.36    0.66 
  -5  -5  13    8.15    0.70 
  -5  -5  13    7.16    0.76 
  -5   5  13    5.23    0.63 
  -5   5  13    6.44    0.69 
   5  -5 -13    6.09    0.72 
   5  -5 -13    6.82    0.70 
   5  -5 -13    6.15    0.66 
   5   5 -13    6.36    0.75 
   5   5 -13    6.72    0.78 
   5   5 -13    6.47    0.77 
  -5  -5  12    1.04    0.45 
  -5  -5  12    0.65    0.39 
  -5  -5  12    0.28    0.40 
  -5   5  12    0.27    0.36 
  -5   5  12    0.65    0.40 
   5  -5 -12    0.55    0.46 
   5  -5 -12    0.45    0.45 
   5  -5 -12    0.86    0.39 
   5  -5 -12    0.31    0.37 
   5   5 -12    0.28    0.39 
   5   5 -12    0.51    0.43 
   5   5 -12    0.66    0.40 
  -5  -5  11    3.08    0.55 
  -5  -5  11    2.73    0.46 
  -5  -5  11    2.80    0.52 
  -5   5  11    3.12    0.50 
  -5   5  11    3.01    0.50 
   5  -5 -11    2.95    0.56 
   5  -5 -11    2.87    0.55 
   5  -5 -11    3.15    0.51 
   5  -5 -11    3.14    0.51 
   5   5 -11    3.03    0.52 
   5   5 -11    3.08    0.55 
   5   5 -11    2.86    0.51 
  -5  -5  10    2.52    0.50 
  -5  -5  10    2.77    0.45 
  -5  -5  10    3.11    0.51 
  -5   5  10    2.55    0.45 
  -5   5  10    3.12    0.52 
   5  -5 -10    3.23    0.57 
   5  -5 -10    2.75    0.52 
   5  -5 -10    2.72    0.47 
   5  -5 -10    2.98    0.48 
   5   5 -10    2.93    0.49 
   5   5 -10    3.31    0.55 
   5   5 -10    2.67    0.53 
  -5  -5   9    0.91    0.39 
  -5  -5   9    1.11    0.36 
  -5  -5   9    1.75    0.43 
  -5   5   9    1.03    0.40 
   5  -5  -9    1.38    0.47 
   5  -5  -9    1.48    0.45 
   5  -5  -9    0.96    0.36 
   5  -5  -9    1.08    0.38 
   5   5  -9    0.96    0.39 
   5   5  -9    1.34    0.46 
   5   5  -9    0.91    0.42 
  -5  -5   8   42.59    1.20 
  -5  -5   8   45.24    1.08 
  -5   5   8   41.40    1.03 
  -5   5   8   39.64    1.18 
   5  -5  -8   41.49    1.27 
   5  -5  -8   42.92    1.25 
   5  -5  -8   41.62    1.06 
   5  -5  -8   39.10    1.08 
   5   5  -8   41.63    1.16 
   5   5  -8   41.67    1.20 
   5   5  -8   42.49    1.23 
  -5  -5   7   28.85    1.00 
  -5  -5   7   26.86    0.86 
  -5   5   7   26.00    0.88 
  -5   5   7   25.87    0.99 
   5  -5  -7   25.67    1.08 
   5  -5  -7   26.60    1.02 
   5  -5  -7   25.51    0.85 
   5   5  -7   27.16    0.93 
   5   5  -7   26.37    1.00 
   5   5  -7   25.33    0.99 
  -5  -5   6    6.22    0.60 
  -5  -5   6    5.53    0.67 
  -5   5   6    5.61    0.58 
  -5   5   6    5.95    0.65 
   5  -5  -6    5.07    0.60 
   5  -5  -6    5.64    0.69 
   5   5  -6    5.59    0.60 
   5   5  -6    5.31    0.64 
   5   5  -6    5.08    0.58 
  -5  -5   5    5.34    0.58 
  -5   5   5    6.09    0.58 
  -5   5   5    5.63    0.63 
   5  -5  -5    5.63    0.68 
   5  -5  -5    6.34    0.68 
   5   5  -5    6.43    0.59 
   5   5  -5    5.99    0.63 
  -5  -5   4    4.55    0.54 
  -5   5   4    4.40    0.51 
  -5   5   4    4.97    0.62 
   5  -5  -4    5.17    0.61 
   5  -5  -4    5.13    0.56 
   5   5  -4    5.15    0.56 
   5   5  -4    4.80    0.59 
  -5  -5   3   12.36    0.68 
  -5   5   3   11.81    0.74 
  -5   5   3   10.97    0.75 
   5  -5  -3   11.79    0.80 
   5  -5  -3   11.82    0.72 
   5   5  -3   11.74    0.64 
  -5  -5   2    5.06    0.51 
  -5   5   2    5.31    0.63 
  -5   5   2    5.38    0.65 
  -5   5   2    4.92    0.61 
   5  -5  -2    5.47    0.60 
   5  -5  -2    4.62    0.56 
  -5  -5   1    0.49    0.28 
  -5   5   1    0.32    0.34 
  -5   5   1    0.54    0.35 
  -5   5   1    0.54    0.36 
   5  -5  -1    0.62    0.40 
   5  -5  -1    0.43    0.33 
   5  -5  -1    0.73    0.38 
  -5  -5   0    0.07    0.25 
  -5   5   0    0.46    0.36 
  -5   5   0    0.32    0.40 
  -5   5   0    0.10    0.34 
   5  -5   0    0.44    0.38 
   5  -5   0    0.50    0.32 
   5  -5   0    0.21    0.37 
   5   5   0    0.39    0.34 
  -5   5  -1    5.66    0.63 
  -5   5  -1    6.31    0.68 
  -5   5  -1    6.24    0.63 
   5  -5   1    6.47    0.68 
   5  -5   1    6.60    0.56 
   5  -5   1    6.89    0.68 
   5   5   1    5.67    0.55 
  -5   5  -2    4.69    0.57 
  -5   5  -2    4.21    0.54 
  -5   5  -2    4.54    0.56 
   5  -5   2    4.95    0.58 
   5  -5   2    4.88    0.56 
   5   5   2    4.38    0.53 
  -5   5  -3    0.34    0.39 
  -5   5  -3    0.41    0.39 
  -5   5  -3   -0.30    0.33 
   5  -5   3    0.24    0.37 
   5  -5   3    0.20    0.37 
   5   5   3   -0.33    0.29 
  -5   5  -4    7.34    0.73 
  -5   5  -4    7.99    0.74 
  -5   5  -4    7.14    0.71 
   5  -5   4    7.50    0.74 
   5  -5   4    7.11    0.69 
   5   5   4    7.55    0.67 
   5   5   4    6.82    0.61 
  -5   5  -5    2.29    0.45 
  -5   5  -5    2.11    0.48 
  -5   5  -5    1.89    0.45 
  -5   5  -5    1.92    0.48 
   5  -5   5    1.92    0.46 
   5  -5   5    2.42    0.48 
   5   5   5    2.14    0.48 
   5   5   5    1.79    0.44 
  -5   5  -6    8.92    0.70 
  -5   5  -6    9.37    0.80 
  -5   5  -6    9.27    0.80 
  -5   5  -6    9.31    0.78 
   5  -5   6   10.56    0.80 
   5  -5   6    9.94    0.85 
   5  -5   6    9.54    0.80 
   5   5   6    8.43    0.87 
   5   5   6    9.34    0.76 
   5   5   6    7.85    0.63 
  -5  -5  -7    0.56    0.36 
  -5   5  -7    0.17    0.37 
  -5   5  -7    0.37    0.42 
  -5   5  -7    0.56    0.42 
  -5   5  -7    0.55    0.41 
   5  -5   7    0.48    0.42 
   5  -5   7    0.53    0.42 
   5  -5   7    0.73    0.43 
   5   5   7    0.39    0.36 
   5   5   7    0.55    0.41 
   5   5   7    0.39    0.40 
  -5  -5  -8    2.82    0.49 
  -5   5  -8    2.12    0.45 
  -5   5  -8    2.71    0.58 
  -5   5  -8    2.63    0.56 
  -5   5  -8    2.27    0.51 
   5  -5   8    2.78    0.51 
   5  -5   8    1.94    0.54 
   5  -5   8    2.91    0.53 
   5   5   8    2.59    0.47 
   5   5   8    2.23    0.52 
   5   5   8    1.90    0.49 
  -5  -5  -9    0.99    0.42 
  -5   5  -9    0.67    0.42 
  -5   5  -9    0.67    0.45 
  -5   5  -9    1.04    0.47 
  -5   5  -9    0.58    0.44 
   5  -5   9    0.72    0.44 
   5  -5   9    1.04    0.53 
   5  -5   9    1.22    0.44 
   5   5   9    0.59    0.39 
   5   5   9    0.90    0.48 
   5   5   9    0.85    0.43 
  -5  -5 -10   -0.21    0.35 
  -5   5 -10   -0.20    0.37 
  -5   5 -10   -0.62    0.41 
  -5   5 -10    0.11    0.43 
  -5   5 -10    0.01    0.40 
   5  -5  10    0.38    0.42 
   5  -5  10    0.15    0.49 
   5  -5  10   -0.22    0.39 
   5   5  10   -0.27    0.43 
   5   5  10    0.10    0.40 
  -5  -5 -11    1.08    0.45 
  -5   5 -11    0.31    0.42 
  -5   5 -11    0.96    0.51 
  -5   5 -11    0.61    0.45 
  -5   5 -11    0.36    0.46 
   5  -5  11    0.18    0.47 
   5  -5  11    0.55    0.66 
   5  -5  11    0.65    0.56 
   5  -5  11    0.66    0.51 
   5   5  11    1.32    0.52 
  -5  -5 -12   17.56    0.97 
  -5   5 -12   16.48    0.98 
  -5   5 -12   17.55    1.07 
  -5   5 -12   16.64    1.05 
  -5   5 -12   15.17    1.03 
   5  -5  12   18.26    1.10 
   5  -5  12   17.91    1.16 
   5   5  12   19.40    1.16 
  -5  -5 -13    0.06    0.39 
  -5   5 -13   -0.07    0.41 
  -5   5 -13   -0.13    0.46 
  -5   5 -13    0.40    0.47 
  -5   5 -13    0.45    0.47 
   5  -5  13   -0.15    0.49 
   5  -5  13    0.03    0.56 
   5   5  13    0.50    0.49 
  -5  -6  14    5.22    0.75 
  -5  -6  14    4.45    0.66 
  -5  -6  13    9.31    0.92 
  -5  -6  13   10.62    0.90 
  -5  -6  13   10.27    0.96 
  -5   6  13    8.06    0.75 
  -5   6  13    8.40    0.86 
   5  -6 -13    8.87    0.94 
   5  -6 -13    9.06    0.95 
   5  -6 -13   10.18    0.83 
   5  -6 -13    8.87    0.82 
   5   6 -13    9.36    0.89 
   5   6 -13    8.64    0.90 
   5   6 -13    8.96    0.98 
  -5  -6  12   -0.14    0.44 
  -5  -6  12    0.25    0.63 
  -5  -6  12    0.18    0.44 
  -5   6  12    0.24    0.38 
  -5   6  12   -0.14    0.43 
   5  -6 -12   -0.20    0.45 
   5  -6 -12   -0.14    0.48 
   5  -6 -12    0.19    0.42 
   5  -6 -12   -0.19    0.40 
   5   6 -12    0.16    0.44 
   5   6 -12   -0.05    0.47 
   5   6 -12    0.26    0.47 
  -5  -6  11    8.66    0.90 
  -5  -6  11    7.27    0.81 
  -5   6  11    7.03    0.72 
  -5   6  11    7.26    0.78 
   5  -6 -11    8.03    0.95 
   5  -6 -11    7.86    0.88 
   5  -6 -11    7.75    0.72 
   5  -6 -11    7.07    0.70 
   5   6 -11    7.83    0.81 
   5   6 -11    6.70    0.75 
   5   6 -11    8.02    0.91 
  -5  -6  10    6.71    0.79 
  -5  -6  10    5.79    0.68 
  -5   6  10    5.41    0.64 
  -5   6  10    7.22    0.81 
   5  -6 -10    6.30    0.79 
   5  -6 -10    6.54    0.77 
   5  -6 -10    5.24    0.65 
   5  -6 -10    6.85    0.68 
   5   6 -10    5.28    0.66 
   5   6 -10    5.69    0.71 
   5   6 -10    6.53    0.81 
  -5  -6   9    6.15    0.73 
  -5  -6   9    5.22    0.64 
  -5   6   9    5.62    0.67 
   5  -6  -9    4.62    0.69 
   5  -6  -9    5.45    0.69 
   5  -6  -9    6.10    0.64 
   5   6  -9    4.48    0.61 
   5   6  -9    5.61    0.68 
   5   6  -9    4.95    0.67 
  -5  -6   8    2.51    0.51 
  -5   6   8    2.66    0.54 
   5  -6  -8    2.21    0.56 
   5  -6  -8    1.94    0.55 
   5  -6  -8    1.88    0.45 
   5   6  -8    2.69    0.53 
   5   6  -8    2.54    0.54 
   5   6  -8    2.17    0.53 
  -5  -6   7    0.99    0.41 
  -5   6   7    0.94    0.45 
   5  -6  -7    0.38    0.48 
   5  -6  -7    1.02    0.48 
   5  -6  -7    0.29    0.36 
   5   6  -7    1.23    0.44 
   5   6  -7    0.56    0.43 
  -5  -6   6    0.22    0.36 
  -5   6   6    0.31    0.37 
  -5   6   6   -0.33    0.38 
   5  -6  -6    0.01    0.47 
   5  -6  -6   -0.18    0.42 
   5   6  -6    0.36    0.40 
   5   6  -6    0.14    0.41 
  -5  -6   5   28.24    1.05 
  -5   6   5   26.91    1.03 
  -5   6   5   26.36    1.12 
   5  -6  -5   27.08    1.19 
   5  -6  -5   28.19    1.15 
   5   6  -5   26.96    1.02 
   5   6  -5   27.71    1.08 
  -5  -6   4    4.99    0.56 
  -5   6   4    4.02    0.56 
  -5   6   4    4.19    0.60 
   5  -6  -4    4.37    0.65 
   5  -6  -4    5.43    0.65 
   5   6  -4    4.49    0.60 
   5   6  -4    4.64    0.54 
  -5  -6   3    0.26    0.34 
  -5   6   3    0.59    0.40 
  -5   6   3    0.27    0.44 
  -5   6   3    0.43    0.38 
   5  -6  -3    0.15    0.45 
   5  -6  -3    0.35    0.41 
   5   6  -3    0.49    0.41 
   5   6  -3    0.34    0.36 
  -5   6   2   11.36    0.84 
  -5   6   2   11.78    0.88 
  -5   6   2   11.34    0.80 
   5  -6  -2   11.65    0.93 
   5  -6  -2   12.23    0.79 
   5  -6  -2   11.77    0.91 
   5   6  -2   10.30    0.69 
  -5   6   1   26.17    1.07 
  -5   6   1   24.77    1.13 
  -5   6   1   24.37    1.03 
   5  -6  -1   24.80    1.10 
   5  -6  -1   26.79    1.01 
   5  -6  -1   25.34    1.16 
   5   6  -1   23.40    0.96 
  -5   6   0    0.89    0.46 
  -5   6   0    0.72    0.45 
  -5   6   0    1.31    0.45 
   5  -6   0    1.45    0.51 
   5  -6   0    1.46    0.49 
   5   6   0    1.18    0.41 
  -5   6  -1    0.40    0.43 
  -5   6  -1    0.06    0.43 
  -5   6  -1    0.22    0.41 
   5  -6   1    0.50    0.45 
   5  -6   1   -0.07    0.44 
   5   6   1    0.27    0.37 
  -5   6  -2    5.20    0.67 
  -5   6  -2    4.66    0.66 
  -5   6  -2    5.30    0.64 
   5  -6   2    5.03    0.65 
   5  -6   2    4.62    0.64 
   5   6   2    4.21    0.56 
  -5   6  -3    6.02    0.72 
  -5   6  -3    6.77    0.83 
  -5   6  -3    6.53    0.75 
   5  -6   3    7.13    0.78 
   5  -6   3    7.87    0.80 
   5   6   3    6.29    0.67 
  -5   6  -4    0.96    0.48 
  -5   6  -4    0.76    0.51 
  -5   6  -4    0.60    0.42 
   5  -6   4    0.63    0.44 
   5  -6   4    0.66    0.47 
   5   6   4    0.69    0.42 
  -5   6  -5    5.24    0.70 
  -5   6  -5    5.60    0.73 
  -5   6  -5    5.36    0.69 
   5  -6   5    5.57    0.68 
   5  -6   5    5.82    0.68 
   5   6   5    4.86    0.58 
   5   6   5    4.93    0.65 
  -5   6  -6   20.77    1.13 
  -5   6  -6   20.24    1.13 
  -5   6  -6   20.70    1.09 
   5  -6   6   23.67    1.10 
   5  -6   6   20.16    1.10 
   5  -6   6   21.88    1.06 
   5   6   6   18.90    0.90 
   5   6   6   17.39    0.96 
  -5  -6  -7    0.08    0.39 
  -5   6  -7    0.11    0.47 
  -5   6  -7   -0.09    0.45 
  -5   6  -7    0.52    0.48 
   5  -6   7    0.41    0.46 
   5  -6   7    0.09    0.53 
   5  -6   7    0.46    0.48 
   5   6   7    0.23    0.39 
   5   6   7    0.50    0.45 
  -5  -6  -8   22.02    1.05 
  -5   6  -8   20.70    1.17 
  -5   6  -8   21.58    1.19 
  -5   6  -8   19.70    1.13 
   5  -6   8   24.38    1.13 
   5  -6   8   22.68    1.24 
   5  -6   8   24.14    1.12 
   5   6   8   20.25    1.00 
  -5  -6  -9   10.67    0.87 
  -5   6  -9    9.59    0.86 
  -5   6  -9    8.57    0.95 
  -5   6  -9    8.48    0.94 
  -5   6  -9    8.92    0.92 
   5  -6   9   10.03    0.98 
   5  -6   9    9.95    1.05 
   5  -6   9   10.39    1.00 
   5   6   9    7.60    0.72 
  -6   0  25    0.06    0.46 
   6   0 -25   -0.02    0.39 
   6   0 -25   -0.59    0.37 
   6   0 -25    0.34    0.46 
  -6   0  24    1.38    0.50 
   6   0 -24    1.70    0.46 
   6   0 -24    1.65    0.49 
   6   0 -24    1.57    0.49 
   6   0 -24    1.36    0.43 
  -6   0  23    0.11    0.37 
  -6   0  23    0.34    0.43 
   6   0 -23   -0.24    0.34 
   6   0 -23    0.00    0.38 
   6   0 -23   -0.44    0.37 
   6   0 -23    0.20    0.33 
  -6   0  22   17.35    0.89 
  -6   0  22   17.23    0.99 
   6   0 -22   17.64    0.91 
   6   0 -22   16.92    0.94 
   6   0 -22   16.43    0.79 
  -6   0  21    0.17    0.34 
  -6   0  21    0.21    0.38 
   6   0 -21   -0.12    0.33 
   6   0 -21    0.02    0.35 
   6   0 -21    0.24    0.30 
  -6   0  20   24.85    0.95 
  -6   0  20   24.02    1.03 
   6   0 -20   24.79    0.97 
   6   0 -20   23.95    0.95 
   6   0 -20   22.48    0.86 
  -6   0  19    0.27    0.32 
  -6   0  19   -0.01    0.36 
   6   0 -19    0.04    0.31 
   6   0 -19    0.03    0.33 
  -6   0  18   77.08    1.42 
  -6   0  18   78.22    1.54 
   6   0 -18   76.43    1.47 
   6   0 -18   77.32    1.42 
  -6   0  17    0.14    0.30 
  -6   0  17    0.04    0.33 
   6   0 -17    0.20    0.25 
   6   0 -17    0.18    0.30 
   6   0 -17    0.25    0.30 
  -6   0  16  210.91    2.17 
  -6   0  16  218.69    2.32 
   6   0 -16  220.82    1.89 
   6   0 -16  212.71    2.24 
  -6   0  15   -0.21    0.26 
  -6   0  15   -0.16    0.24 
   6   0 -15   -0.21    0.22 
   6   0 -15   -0.15    0.22 
  -6   0  14   36.91    0.93 
  -6   0  14   36.62    0.93 
   6   0 -14   36.36    0.71 
   6   0 -14   37.97    0.82 
  -6   0  13    0.07    0.24 
  -6   0  13   -0.04    0.25 
   6   0 -13    0.15    0.15 
  -6   0  12    1.62    0.31 
  -6   0  12    1.54    0.31 
   6   0 -12    1.55    0.19 
  -6   0  11    0.18    0.22 
  -6   0  11   -0.19    0.23 
   6   0 -11    0.05    0.14 
  -6   0  10    9.37    0.50 
   6   0 -10    9.17    0.32 
  -6   0   9    0.00    0.21 
   6   0  -9    0.15    0.15 
  -6   0   8 1289.52    9.23 
   6   0  -8 1333.65    5.86 
  -6   0   7   -0.10    0.18 
   6   0  -7    0.05    0.15 
  -6   0   6   19.82    0.58 
   6   0  -6   19.40    0.43 
  -6   0   5    0.02    0.19 
   6   0  -5    0.06    0.16 
  -6   0   4  302.39    1.81 
   6   0  -4  315.24    1.61 
  -6   0   3    0.12    0.18 
   6   0  -3    0.05    0.17 
  -6   0   2   61.34    0.81 
   6   0  -2   62.71    0.82 
  -6   0   1   -0.10    0.16 
   6   0  -1    0.05    0.19 
  -6   0   0   12.94    0.42 
   6   0   0   12.45    0.47 
   6   0   1    0.06    0.20 
   6   0   2   11.95    0.50 
  -6   0  -3   -0.10    0.15 
   6   0   3   -0.01    0.22 
  -6   0  -4   86.16    0.98 
  -6   0  -5   -0.04    0.16 
  -6   0  -6   21.19    0.54 
  -6   0  -7   -0.18    0.15 
  -6   0  -8    7.73    0.38 
   6   0   8    8.46    0.49 
  -6   0  -9    0.00    0.18 
   6   0   9    0.09    0.24 
   6   0   9   -0.05    0.28 
  -6   0 -10    1.27    0.25 
  -6   0 -10    1.46    0.35 
   6   0  10    1.24    0.24 
   6   0  10    1.35    0.32 
   6   0  10    1.25    0.35 
  -6   0 -11    0.02    0.29 
   6   0  11   -0.14    0.27 
   6   0  11    0.32    0.31 
  -6   0 -12    4.58    0.56 
   6   0  12    4.44    0.49 
   6   0  12    4.72    0.53 
  -6   0 -13    0.20    0.29 
  -6   0 -13   -0.13    0.29 
   6   0  13    0.53    0.37 
  -6   0 -14    0.48    0.30 
  -6   0 -14    0.61    0.36 
   6   0  14    0.60    0.39 
  -6   0 -15   -0.01    0.29 
  -6   0 -15   -0.33    0.30 
   6   0  15   -0.28    0.37 
  -6   0 -16    2.62    0.48 
  -6   0 -16    2.12    0.48 
   6   0  16    3.22    0.55 
  -6   0 -17   -0.23    0.36 
  -6   0 -17   -0.47    0.35 
   6   0  17   -0.10    0.41 
  -6   0 -18   -0.09    0.33 
  -6   0 -18   -0.36    0.39 
   6   0  18   -0.08    0.41 
  -6   0 -19    0.27    0.43 
  -6   0 -19    0.25    0.43 
   6   0  19    0.31    0.47 
  -6  -1  25    0.30    0.43 
  -6  -1  25    0.30    0.50 
  -6   1  25   -0.16    0.43 
   6  -1 -25   -0.50    0.40 
   6  -1 -25    0.29    0.43 
   6  -1 -25    0.21    0.39 
   6   1 -25    0.39    0.40 
   6   1 -25    0.17    0.47 
  -6  -1  24   16.28    0.96 
  -6  -1  24   17.27    1.10 
  -6   1  24   15.02    1.03 
   6  -1 -24   16.27    0.98 
   6  -1 -24   16.68    0.98 
   6  -1 -24   15.54    0.86 
   6   1 -24   16.40    0.88 
   6   1 -24   16.47    0.93 
   6   1 -24   16.76    1.03 
  -6  -1  23    4.14    0.59 
  -6  -1  23    4.30    0.68 
  -6   1  23    4.82    0.64 
   6  -1 -23    3.52    0.57 
   6  -1 -23    4.40    0.61 
   6  -1 -23    4.66    0.58 
   6   1 -23    4.57    0.57 
   6   1 -23    5.46    0.64 
   6   1 -23    3.92    0.62 
  -6  -1  22    1.01    0.42 
  -6  -1  22    1.81    0.54 
  -6   1  22    1.22    0.61 
  -6   1  22    1.30    0.47 
   6  -1 -22    0.57    0.42 
   6  -1 -22    1.22    0.43 
   6  -1 -22    1.04    0.39 
   6   1 -22    1.12    0.37 
   6   1 -22    1.12    0.41 
   6   1 -22    1.01    0.45 
  -6  -1  21   50.02    1.33 
  -6  -1  21   49.84    1.45 
  -6   1  21   51.83    1.25 
  -6   1  21   48.31    1.36 
   6  -1 -21   47.97    1.36 
   6  -1 -21   50.87    1.30 
   6  -1 -21   47.56    1.27 
   6   1 -21   51.26    1.26 
   6   1 -21   49.11    1.29 
   6   1 -21   49.00    1.37 
  -6  -1  20    0.41    0.37 
  -6  -1  20    0.56    0.43 
  -6   1  20    0.56    0.34 
  -6   1  20    0.38    0.39 
   6  -1 -20    0.52    0.34 
   6  -1 -20    0.51    0.39 
   6  -1 -20    0.72    0.36 
   6  -1 -20    0.55    0.35 
   6   1 -20    0.30    0.30 
   6   1 -20    0.56    0.33 
   6   1 -20    0.54    0.38 
   6   1 -20    0.64    0.39 
  -6  -1  19    4.06    0.52 
  -6  -1  19    4.45    0.59 
  -6   1  19    4.50    0.50 
  -6   1  19    4.13    0.53 
   6  -1 -19    4.38    0.49 
   6  -1 -19    3.63    0.49 
   6  -1 -19    4.58    0.52 
   6  -1 -19    3.93    0.49 
   6   1 -19    3.56    0.47 
   6   1 -19    4.69    0.58 
  -6  -1  18    1.55    0.40 
  -6  -1  18    1.63    0.46 
  -6   1  18    1.99    0.39 
  -6   1  18    2.24    0.44 
   6  -1 -18    2.08    0.38 
   6  -1 -18    1.51    0.38 
   6  -1 -18    2.21    0.41 
   6  -1 -18    1.95    0.43 
   6   1 -18    1.97    0.39 
   6   1 -18    1.95    0.44 
  -6  -1  17  101.15    1.64 
  -6  -1  17  102.16    1.71 
  -6   1  17  101.50    1.54 
  -6   1  17   97.18    1.63 
   6  -1 -17  104.79    1.51 
   6  -1 -17   97.86    1.64 
   6   1 -17  100.38    1.58 
   6   1 -17   99.92    1.63 
  -6  -1  16   22.93    0.85 
  -6  -1  16   23.72    0.91 
  -6   1  16   23.08    0.79 
  -6   1  16   23.08    0.87 
   6  -1 -16   22.99    0.76 
   6   1 -16   22.19    0.79 
   6   1 -16   22.27    0.84 
  -6  -1  15   59.80    1.23 
  -6  -1  15   60.90    1.24 
  -6   1  15   61.07    1.16 
  -6   1  15   58.87    1.23 
   6  -1 -15   62.14    1.13 
   6  -1 -15   58.37    1.21 
   6   1 -15   60.62    1.18 
  -6  -1  14   61.92    1.20 
  -6  -1  14   63.10    1.23 
  -6   1  14   62.44    1.14 
  -6   1  14   61.93    1.21 
   6  -1 -14   62.70    1.11 
   6  -1 -14   60.48    1.18 
   6   1 -14   65.30    1.75 
  -6  -1  13    8.86    0.57 
  -6   1  13    8.70    0.54 
  -6   1  13    9.19    0.56 
   6  -1 -13    8.60    0.50 
  -6  -1  12  123.01    1.55 
  -6  -1  12  127.03    1.56 
  -6   1  12  120.75    1.47 
  -6   1  12  126.26    1.56 
   6  -1 -12  125.18    1.27 
   6  -1 -12  127.67    1.47 
  -6  -1  11    7.16    0.50 
  -6  -1  11    7.90    0.50 
  -6   1  11    7.07    0.46 
  -6   1  11    6.84    0.48 
   6  -1 -11    7.38    0.40 
   6  -1 -11    7.79    0.47 
  -6  -1  10    1.24    0.29 
  -6   1  10    1.15    0.27 
   6  -1 -10    0.90    0.22 
   6  -1 -10    1.09    0.27 
  -6  -1   9   19.16    0.63 
  -6   1   9   19.18    0.62 
   6  -1  -9   20.03    0.54 
  -6  -1   8   73.34    1.07 
  -6   1   8   70.34    1.04 
   6  -1  -8   73.16    0.92 
  -6  -1   7   27.76    0.68 
  -6   1   7   27.30    0.68 
   6  -1  -7   29.17    0.62 
  -6  -1   6  183.17    1.54 
  -6   1   6  179.81    1.55 
   6  -1  -6  183.64    1.42 
  -6  -1   5   80.14    1.01 
  -6   1   5   80.30    1.05 
   6  -1  -5   82.30    0.97 
  -6  -1   4  145.78    1.27 
  -6   1   4  142.53    1.35 
   6  -1  -4  144.36    1.28 
  -6  -1   3    3.28    0.33 
  -6   1   3    2.95    0.35 
   6  -1  -3    3.09    0.35 
  -6  -1   2   32.09    0.59 
   6  -1  -2   32.23    0.68 
  -6  -1   1  269.46    1.51 
   6  -1  -1  272.40    1.83 
  -6  -1   0    6.50    0.31 
  -6   1   0    6.54    0.40 
   6  -1   0    6.27    0.42 
  -6  -1  -1   11.20    0.34 
  -6   1  -1   10.80    0.46 
   6  -1   1   10.59    0.46 
  -6  -1  -2    0.47    0.14 
  -6   1  -2    0.33    0.20 
   6  -1   2    0.31    0.24 
  -6   1  -3   -0.04    0.17 
   6  -1   3   -0.11    0.21 
  -6   1  -4   19.54    0.58 
   6  -1   4   20.42    0.66 
  -6  -1  -5   36.21    0.57 
  -6   1  -5   35.72    0.77 
   6  -1   5   35.88    0.84 
  -6  -1  -6   -0.01    0.13 
  -6   1  -6    0.10    0.20 
   6  -1   6    0.29    0.26 
   6  -1   6    0.14    0.24 
  -6  -1  -7  220.20    1.33 
  -6   1  -7  212.71    1.82 
   6  -1   7  219.27    2.05 
   6  -1   7  226.29    1.96 
  -6   1  -8    8.05    0.48 
   6  -1   8    8.40    0.57 
   6  -1   8    8.34    0.54 
  -6  -1  -9   -0.01    0.26 
  -6   1  -9    0.03    0.22 
   6  -1   9   -0.15    0.29 
   6  -1   9    0.25    0.30 
   6   1   9    0.31    0.27 
  -6  -1 -10    1.19    0.34 
  -6   1 -10    1.11    0.28 
  -6   1 -10    1.33    0.29 
  -6   1 -10    1.08    0.31 
   6  -1  10    1.00    0.34 
   6  -1  10    0.94    0.29 
   6  -1  10    1.27    0.37 
   6   1  10    1.18    0.35 
  -6  -1 -11   86.46    1.54 
  -6   1 -11   86.44    1.29 
  -6   1 -11   91.05    1.30 
  -6   1 -11   87.62    1.50 
   6  -1  11   87.79    1.26 
   6  -1  11   88.84    1.50 
   6  -1  11   90.28    1.31 
   6  -1  11   89.17    1.51 
   6   1  11   88.37    1.55 
  -6  -1 -12    7.77    0.64 
  -6   1 -12    6.91    0.54 
  -6   1 -12    7.60    0.52 
  -6   1 -12    7.92    0.53 
  -6   1 -12    7.84    0.62 
   6  -1  12    7.56    0.54 
   6  -1  12    7.74    0.67 
   6  -1  12    7.68    0.57 
   6  -1  12    7.69    0.67 
   6   1  12    7.20    0.61 
  -6  -1 -13    0.00    0.31 
  -6  -1 -13    0.35    0.31 
  -6  -1 -13    0.49    0.34 
  -6   1 -13    0.30    0.33 
  -6   1 -13    0.28    0.28 
  -6   1 -13    0.24    0.31 
   6  -1  13    0.49    0.38 
   6  -1  13    0.35    0.42 
   6  -1  13    0.17    0.35 
   6   1  13    0.05    0.34 
  -6  -1 -14   19.36    0.87 
  -6  -1 -14   20.21    0.82 
  -6  -1 -14   19.98    0.93 
  -6   1 -14   19.98    0.90 
  -6   1 -14   20.05    0.91 
   6  -1  14   20.13    0.94 
   6  -1  14   20.38    0.92 
   6   1  14   20.27    0.95 
  -6  -1 -15    4.69    0.57 
  -6  -1 -15    4.62    0.55 
  -6  -1 -15    4.47    0.58 
  -6   1 -15    4.68    0.58 
  -6   1 -15    5.03    0.62 
   6  -1  15    4.29    0.59 
   6  -1  15    5.02    0.59 
   6   1  15    4.88    0.60 
  -6  -1 -16    0.94    0.41 
  -6  -1 -16    0.64    0.35 
  -6  -1 -16    0.78    0.42 
  -6   1 -16    0.33    0.34 
  -6   1 -16    0.49    0.42 
   6  -1  16    0.73    0.45 
   6  -1  16    0.53    0.42 
   6   1  16    0.27    0.44 
  -6  -1 -17    3.56    0.57 
  -6  -1 -17    4.19    0.57 
  -6  -1 -17    3.15    0.56 
  -6   1 -17    3.80    0.59 
  -6   1 -17    3.25    0.60 
   6  -1  17    4.29    0.65 
   6  -1  17    3.23    0.57 
   6   1  17    3.85    0.61 
  -6  -1 -18   21.25    1.05 
  -6  -1 -18   21.81    1.11 
  -6   1 -18   20.28    1.04 
  -6   1 -18   20.94    1.09 
   6  -1  18   22.30    1.09 
   6   1  18   22.04    1.15 
  -6  -1 -19   14.55    0.95 
  -6  -1 -19   12.41    0.97 
  -6   1 -19   13.19    0.93 
  -6   1 -19   13.03    0.98 
   6  -1  19   14.29    1.00 
   6   1  19   13.33    0.99 
  -6  -2  24    1.51    0.51 
  -6  -2  24    1.26    0.57 
  -6   2  24    1.64    0.53 
   6  -2 -24    2.13    0.57 
   6  -2 -24    1.35    0.46 
   6   2 -24    1.92    0.49 
   6   2 -24    0.94    0.52 
  -6  -2  23    0.67    0.44 
  -6  -2  23    0.45    0.52 
  -6   2  23    0.79    0.44 
   6  -2 -23    0.94    0.44 
   6  -2 -23    0.82    0.48 
   6  -2 -23    0.97    0.43 
   6   2 -23    0.43    0.38 
   6   2 -23    0.64    0.47 
   6   2 -23    1.14    0.47 
  -6  -2  22   12.25    0.87 
  -6  -2  22   12.54    0.98 
  -6   2  22   13.22    0.89 
   6  -2 -22   13.96    0.87 
   6  -2 -22   12.99    0.90 
   6  -2 -22   11.78    0.80 
   6   2 -22   11.80    0.79 
   6   2 -22   12.65    0.93 
   6   2 -22   13.95    0.89 
  -6  -2  21   -0.02    0.38 
  -6  -2  21    0.74    0.48 
  -6   2  21    0.17    0.38 
   6  -2 -21    0.48    0.39 
   6  -2 -21    0.49    0.41 
   6  -2 -21    0.42    0.37 
   6   2 -21    0.14    0.34 
   6   2 -21    0.28    0.43 
   6   2 -21    0.50    0.41 
  -6  -2  20    1.33    0.46 
  -6  -2  20    1.94    0.51 
  -6   2  20    2.21    0.48 
   6  -2 -20    1.75    0.44 
   6  -2 -20    1.51    0.44 
   6  -2 -20    1.88    0.44 
   6   2 -20    1.86    0.41 
   6   2 -20    2.40    0.51 
   6   2 -20    2.25    0.48 
  -6  -2  19   11.64    0.82 
  -6  -2  19   10.26    0.82 
  -6   2  19   10.22    0.65 
  -6   2  19   11.43    0.77 
   6  -2 -19   10.06    0.71 
   6  -2 -19    9.99    0.74 
   6  -2 -19    9.94    0.69 
   6   2 -19    9.52    0.65 
   6   2 -19   10.50    0.78 
   6   2 -19    9.64    0.76 
  -6  -2  18    7.67    0.72 
  -6  -2  18    6.80    0.71 
  -6   2  18    7.41    0.58 
  -6   2  18    7.34    0.65 
   6  -2 -18    7.53    0.65 
   6  -2 -18    7.31    0.66 
   6  -2 -18    6.25    0.60 
   6   2 -18    7.44    0.59 
   6   2 -18    7.40    0.70 
   6   2 -18    7.72    0.67 
  -6  -2  17    8.88    0.71 
  -6  -2  17    9.46    0.74 
  -6   2  17    9.46    0.60 
  -6   2  17    8.29    0.65 
   6  -2 -17    9.90    0.67 
   6  -2 -17    8.66    0.67 
   6  -2 -17    9.12    0.64 
   6   2 -17   10.32    0.62 
   6   2 -17    8.55    0.70 
   6   2 -17    9.69    0.69 
  -6  -2  16    0.33    0.34 
  -6  -2  16    0.52    0.38 
  -6   2  16    0.27    0.28 
  -6   2  16    0.06    0.31 
   6  -2 -16    0.25    0.31 
   6  -2 -16    0.25    0.32 
   6  -2 -16   -0.11    0.32 
   6   2 -16    0.43    0.30 
   6   2 -16    0.21    0.33 
   6   2 -16    0.16    0.32 
  -6  -2  15   42.47    1.13 
  -6  -2  15   41.78    1.12 
  -6   2  15   40.46    0.97 
  -6   2  15   41.16    1.08 
   6  -2 -15   41.58    1.06 
   6  -2 -15   40.30    1.08 
   6   2 -15   41.43    1.01 
   6   2 -15   41.08    1.10 
  -6  -2  14    1.40    0.37 
  -6  -2  14    1.24    0.32 
  -6  -2  14    1.56    0.38 
  -6   2  14    1.32    0.31 
  -6   2  14    1.12    0.34 
   6  -2 -14    1.47    0.36 
   6  -2 -14    1.13    0.32 
   6   2 -14    1.60    0.33 
   6   2 -14    1.19    0.36 
  -6  -2  13   24.87    0.86 
  -6  -2  13   27.30    0.78 
  -6  -2  13   27.33    0.88 
  -6   2  13   26.30    0.78 
   6  -2 -13   27.75    0.85 
   6  -2 -13   26.63    0.84 
  -6  -2  12    9.05    0.60 
  -6  -2  12    9.44    0.51 
  -6  -2  12    9.17    0.59 
  -6   2  12    8.57    0.53 
  -6   2  12    8.22    0.51 
   6  -2 -12    8.91    0.57 
   6  -2 -12    9.00    0.55 
  -6  -2  11    6.87    0.56 
  -6  -2  11    6.94    0.52 
  -6   2  11    6.85    0.49 
   6  -2 -11    7.15    0.50 
   6  -2 -11    6.47    0.51 
  -6  -2  10   11.66    0.60 
  -6  -2  10   12.02    0.58 
  -6   2  10   13.14    0.58 
  -6   2  10   12.12    0.57 
   6  -2 -10   12.69    0.55 
   6  -2 -10   12.51    0.61 
  -6  -2   9    5.81    0.48 
  -6   2   9    6.13    0.44 
  -6   2   9    5.41    0.44 
   6  -2  -9    5.64    0.45 
   6  -2  -9    5.92    0.48 
  -6  -2   8    1.86    0.31 
  -6   2   8    1.89    0.30 
  -6   2   8    1.81    0.30 
   6  -2  -8    2.01    0.30 
   6  -2  -8    1.77    0.31 
  -6  -2   7   74.03    1.11 
   6  -2  -7   73.88    1.09 
   6  -2  -7   76.79    1.15 
  -6  -2   6    3.10    0.37 
   6  -2  -6    2.41    0.30 
   6  -2  -6    2.51    0.31 
  -6  -2   5    0.19    0.21 
   6  -2  -5    0.37    0.24 
   6  -2  -5    0.41    0.25 
  -6  -2   4   43.53    0.77 
  -6   2   4   41.45    0.82 
   6  -2  -4   42.65    0.83 
  -6  -2   3   46.98    0.77 
  -6   2   3   44.18    0.85 
   6  -2  -3   46.09    0.87 
  -6  -2   2   80.08    0.93 
  -6   2   2   75.98    1.10 
   6  -2  -2   79.29    1.13 
  -6  -2   1    0.64    0.18 
  -6   2   1    0.32    0.22 
   6  -2  -1    0.22    0.25 
  -6  -2   0   38.22    0.60 
  -6   2   0   36.75    0.81 
   6  -2   0   36.53    0.80 
  -6  -2  -1    5.71    0.28 
  -6   2  -1    5.20    0.39 
   6  -2   1    6.06    0.46 
  -6  -2  -2    1.04    0.16 
  -6   2  -2    0.91    0.26 
   6  -2   2    0.79    0.28 
  -6  -2  -3    0.10    0.11 
  -6   2  -3    0.00    0.22 
   6  -2   3    0.02    0.24 
  -6   2  -4    1.52    0.28 
   6  -2   4    2.46    0.35 
   6  -2   4    2.36    0.34 
  -6   2  -5   14.65    0.62 
  -6   2  -5   14.39    0.68 
   6  -2   5   14.57    0.64 
   6  -2   5   15.96    0.65 
  -6   2  -6    0.43    0.26 
  -6   2  -6    0.49    0.26 
   6  -2   6    0.36    0.28 
   6  -2   6    0.17    0.29 
   6   2   6    0.54    0.35 
  -6   2  -7    4.32    0.46 
  -6   2  -7    4.20    0.43 
   6  -2   7    5.01    0.52 
   6  -2   7    4.96    0.53 
   6  -2   7    5.34    0.60 
   6   2   7    4.42    0.53 
  -6  -2  -8  191.25    2.11 
  -6   2  -8  185.62    1.98 
  -6   2  -8  194.21    1.93 
   6  -2   8  196.20    2.06 
   6  -2   8  200.24    2.11 
   6  -2   8  200.64    2.09 
   6   2   8  194.13    2.14 
  -6  -2  -9    5.82    0.53 
  -6   2  -9    5.89    0.52 
  -6   2  -9    5.64    0.50 
   6  -2   9    6.03    0.58 
   6  -2   9    6.11    0.62 
   6  -2   9    6.07    0.58 
   6   2   9    6.06    0.61 
  -6  -2 -10    4.74    0.57 
  -6   2 -10    5.52    0.85 
  -6   2 -10    4.74    0.50 
  -6   2 -10    5.61    0.50 
  -6   2 -10    5.15    0.53 
   6  -2  10    4.79    0.59 
   6  -2  10    6.08    0.63 
   6  -2  10    5.56    0.58 
   6   2  10    5.29    0.62 
  -6  -2 -11   11.79    0.73 
  -6   2 -11   10.78    0.67 
  -6   2 -11   11.58    0.66 
  -6   2 -11   12.18    0.67 
  -6   2 -11   11.31    0.67 
  -6   2 -11   10.81    0.67 
   6  -2  11   12.49    0.71 
   6  -2  11   12.04    0.77 
   6  -2  11   11.94    0.72 
   6   2  11   10.77    0.75 
  -6  -2 -12    3.53    0.51 
  -6   2 -12    2.97    0.44 
  -6   2 -12    3.03    0.43 
  -6   2 -12    2.85    0.44 
  -6   2 -12    3.11    0.47 
  -6   2 -12    2.89    0.46 
   6  -2  12    3.35    0.46 
   6  -2  12    2.82    0.50 
   6  -2  12    2.93    0.47 
   6   2  12    2.48    0.48 
  -6  -2 -13    1.17    0.41 
  -6   2 -13    1.47    0.38 
  -6   2 -13    1.47    0.38 
  -6   2 -13    1.59    0.39 
  -6   2 -13    1.38    0.41 
  -6   2 -13    1.16    0.39 
   6  -2  13    1.80    0.41 
   6  -2  13    1.21    0.46 
   6  -2  13    2.21    0.44 
   6  -2  13    1.79    0.44 
   6   2  13    1.30    0.45 
  -6  -2 -14   82.39    1.61 
  -6  -2 -14   79.08    1.69 
  -6   2 -14   79.00    1.66 
  -6   2 -14   80.87    1.52 
  -6   2 -14   84.28    1.53 
  -6   2 -14   78.54    1.62 
  -6   2 -14   81.45    1.58 
   6  -2  14   82.22    1.51 
   6  -2  14   81.81    1.72 
   6  -2  14   81.21    1.55 
   6  -2  14   84.10    1.62 
   6   2  14   82.67    1.74 
  -6  -2 -15    1.89    0.45 
  -6  -2 -15    1.36    0.45 
  -6   2 -15    1.36    0.44 
  -6   2 -15    1.53    0.41 
  -6   2 -15    1.65    0.43 
  -6   2 -15    1.71    0.45 
  -6   2 -15    1.55    0.42 
   6  -2  15    1.56    0.53 
   6  -2  15    1.50    0.45 
   6  -2  15    1.52    0.47 
   6   2  15    1.54    0.48 
  -6  -2 -16    3.77    0.54 
  -6  -2 -16    3.41    0.54 
  -6   2 -16    4.80    0.63 
  -6   2 -16    3.96    0.55 
  -6   2 -16    3.26    0.54 
  -6   2 -16    3.51    0.54 
   6  -2  16    3.75    0.64 
   6  -2  16    4.15    0.58 
   6  -2  16    4.22    0.60 
   6   2  16    3.77    0.61 
  -6  -2 -17    0.77    0.42 
  -6  -2 -17    0.88    0.42 
  -6  -2 -17    0.77    0.45 
  -6   2 -17    0.42    0.41 
  -6   2 -17    1.01    0.44 
  -6   2 -17    1.23    0.45 
  -6   2 -17    1.28    0.49 
   6  -2  17    0.75    0.51 
   6  -2  17    1.05    0.49 
   6  -2  17    0.81    0.47 
   6   2  17    0.87    0.51 
  -6  -2 -18   38.98    1.36 
  -6  -2 -18   40.39    1.30 
  -6  -2 -18   38.82    1.41 
  -6   2 -18   40.84    1.41 
  -6   2 -18   41.71    1.42 
   6  -2  18   40.51    1.49 
   6  -2  18   42.27    1.37 
   6   2  18   41.04    1.46 
  -6  -3  23    0.32    0.51 
  -6  -3  23    0.56    0.55 
  -6   3  23    0.50    0.45 
   6  -3 -23    0.53    0.48 
   6   3 -23    0.59    0.50 
   6   3 -23    0.29    0.46 
  -6  -3  22    4.44    0.70 
  -6  -3  22    3.31    0.67 
  -6   3  22    2.78    0.57 
   6  -3 -22    3.36    0.60 
   6  -3 -22    3.86    0.65 
   6  -3 -22    3.19    0.57 
   6   3 -22    3.63    0.66 
   6   3 -22    3.37    0.61 
  -6  -3  21    0.55    0.49 
  -6  -3  21    0.58    0.51 
  -6   3  21    0.46    0.42 
   6  -3 -21    0.76    0.47 
   6  -3 -21    0.18    0.43 
   6  -3 -21    0.45    0.40 
   6   3 -21    0.76    0.48 
   6   3 -21    0.68    0.46 
  -6  -3  20    3.75    0.63 
  -6  -3  20    4.04    0.68 
  -6   3  20    4.12    0.60 
   6  -3 -20    3.78    0.58 
   6  -3 -20    4.06    0.61 
   6  -3 -20    3.92    0.59 
   6   3 -20    3.14    0.57 
   6   3 -20    3.38    0.56 
  -6  -3  19    0.95    0.49 
  -6  -3  19    0.73    0.44 
  -6  -3  19    1.30    0.53 
  -6   3  19    1.53    0.46 
  -6   3  19    1.28    0.44 
   6  -3 -19    0.65    0.44 
   6  -3 -19    1.27    0.42 
   6  -3 -19    0.84    0.40 
   6   3 -19    1.35    0.39 
   6   3 -19    1.32    0.49 
   6   3 -19    0.84    0.46 
  -6  -3  18    1.18    0.46 
  -6  -3  18    1.08    0.43 
  -6  -3  18    1.34    0.49 
  -6   3  18    1.31    0.43 
  -6   3  18    1.15    0.42 
   6  -3 -18    1.00    0.43 
   6  -3 -18    1.27    0.43 
   6  -3 -18    1.24    0.44 
   6   3 -18    1.37    0.37 
   6   3 -18    0.70    0.42 
   6   3 -18    1.45    0.48 
  -6  -3  17    0.89    0.45 
  -6  -3  17    1.63    0.42 
  -6  -3  17    1.02    0.44 
  -6   3  17    1.17    0.41 
  -6   3  17    1.09    0.39 
   6  -3 -17    0.64    0.40 
   6  -3 -17    1.63    0.44 
   6  -3 -17    1.26    0.38 
   6   3 -17    1.11    0.36 
   6   3 -17    1.07    0.44 
   6   3 -17    0.74    0.43 
  -6  -3  16    1.06    0.43 
  -6  -3  16    1.82    0.41 
  -6  -3  16    0.69    0.42 
  -6   3  16    1.34    0.39 
  -6   3  16    0.78    0.38 
   6  -3 -16    1.11    0.42 
   6  -3 -16    0.81    0.39 
   6  -3 -16    1.38    0.40 
   6   3 -16    1.04    0.34 
   6   3 -16    1.13    0.40 
   6   3 -16    1.75    0.46 
  -6  -3  15   20.28    0.92 
  -6  -3  15   22.66    0.84 
  -6  -3  15   21.99    0.96 
  -6   3  15   19.09    0.84 
   6  -3 -15   20.68    0.90 
   6  -3 -15   20.53    0.84 
   6  -3 -15   19.26    0.84 
   6   3 -15   21.50    0.93 
   6   3 -15   19.32    0.76 
   6   3 -15   20.61    0.92 
   6   3 -15   20.04    0.90 
  -6  -3  14   19.29    0.90 
  -6  -3  14   20.11    0.77 
  -6  -3  14   19.16    0.88 
  -6   3  14   18.03    1.01 
  -6   3  14   19.76    0.83 
   6  -3 -14   18.78    0.86 
   6  -3 -14   18.92    0.82 
   6  -3 -14   18.01    0.79 
   6   3 -14   19.11    0.86 
   6   3 -14   20.20    0.75 
   6   3 -14   18.07    0.86 
   6   3 -14   19.54    0.88 
  -6  -3  13    0.65    0.38 
  -6  -3  13    0.63    0.30 
  -6  -3  13    0.63    0.36 
  -6   3  13    0.44    0.24 
  -6   3  13    0.54    0.32 
   6  -3 -13    0.66    0.36 
   6  -3 -13    0.56    0.31 
   6   3 -13    0.86    0.36 
   6   3 -13    0.82    0.30 
   6   3 -13    0.98    0.38 
   6   3 -13    0.91    0.40 
  -6  -3  12   45.43    1.15 
  -6  -3  12   46.48    0.97 
  -6  -3  12   45.65    1.11 
  -6   3  12   45.08    0.90 
  -6   3  12   45.00    1.10 
   6  -3 -12   44.38    1.08 
   6  -3 -12   44.97    1.11 
   6  -3 -12   44.32    1.07 
   6   3 -12   46.46    1.13 
   6   3 -12   43.32    0.99 
   6   3 -12   43.36    1.12 
   6   3 -12   45.23    1.20 
  -6  -3  11   17.50    0.79 
  -6  -3  11   19.33    0.66 
  -6  -3  11   18.38    0.75 
  -6   3  11   17.62    0.62 
  -6   3  11   17.45    0.74 
   6  -3 -11   17.62    0.75 
   6  -3 -11   18.63    0.79 
   6  -3 -11   18.76    0.72 
   6   3 -11   18.09    0.74 
   6   3 -11   17.25    0.78 
  -6  -3  10    3.24    0.43 
  -6  -3  10    3.81    0.41 
  -6  -3  10    4.15    0.50 
  -6   3  10    3.36    0.40 
  -6   3  10    3.56    0.42 
   6  -3 -10    3.76    0.44 
   6  -3 -10    4.15    0.48 
   6  -3 -10    3.62    0.66 
   6   3 -10    4.08    0.44 
   6   3 -10    4.13    0.55 
  -6  -3   9    0.99    0.32 
  -6  -3   9    1.36    0.32 
  -6   3   9    1.07    0.27 
  -6   3   9    1.03    0.32 
   6  -3  -9    0.79    0.32 
   6  -3  -9    0.74    0.31 
   6   3  -9    1.19    0.32 
  -6  -3   8    0.15    0.27 
  -6  -3   8    0.05    0.24 
  -6   3   8    0.07    0.22 
  -6   3   8    0.03    0.27 
   6  -3  -8    0.13    0.28 
   6  -3  -8    0.24    0.26 
   6   3  -8    0.09    0.25 
  -6  -3   7    1.86    0.33 
  -6   3   7    1.84    0.30 
  -6   3   7    1.86    0.35 
   6  -3  -7    1.32    0.32 
   6  -3  -7    1.55    0.35 
  -6  -3   6    6.62    0.50 
  -6   3   6    6.29    0.45 
  -6   3   6    6.85    0.48 
   6  -3  -6    6.54    0.53 
   6  -3  -6    6.96    0.53 
  -6  -3   5    0.06    0.22 
  -6   3   5   -0.04    0.21 
  -6   3   5    0.00    0.21 
   6  -3  -5    0.31    0.27 
   6  -3  -5   -0.05    0.25 
  -6  -3   4   18.93    0.60 
  -6   3   4   18.07    0.64 
  -6   3   4   19.10    0.70 
   6  -3  -4   19.19    0.71 
   6  -3  -4   20.67    0.69 
  -6  -3   3    1.01    0.24 
  -6   3   3    0.84    0.28 
  -6   3   3    0.90    0.28 
   6  -3  -3    0.90    0.28 
   6  -3  -3    1.38    0.31 
  -6  -3   2   11.61    0.47 
  -6   3   2   10.47    0.56 
  -6   3   2   11.11    0.57 
   6  -3  -2   11.36    0.60 
   6  -3  -2   11.97    0.55 
  -6  -3   1   31.14    0.65 
  -6   3   1   29.91    0.82 
  -6   3   1   30.92    0.84 
   6  -3  -1   31.49    0.84 
   6  -3  -1   32.39    0.77 
  -6  -3   0   45.73    0.73 
  -6   3   0   44.21    0.99 
  -6   3   0   44.56    0.96 
   6  -3   0   46.87    1.02 
   6  -3   0   46.67    0.89 
  -6  -3  -1    1.19    0.21 
  -6   3  -1    1.47    0.33 
  -6   3  -1    1.50    0.34 
   6  -3   1    1.09    0.32 
  -6  -3  -2    0.35    0.16 
  -6   3  -2    0.03    0.27 
  -6   3  -2    0.28    0.26 
   6  -3   2    0.40    0.30 
  -6  -3  -3    3.32    0.34 
  -6   3  -3    3.95    0.45 
  -6   3  -3    4.08    0.47 
   6  -3   3    3.39    0.42 
   6  -3   3    4.22    0.51 
  -6   3  -4    3.64    0.46 
  -6   3  -4    3.16    0.41 
   6  -3   4    3.46    0.43 
   6  -3   4    3.68    0.44 
   6   3   4    3.92    0.44 
  -6   3  -5    3.54    0.46 
  -6   3  -5    3.02    0.40 
   6  -3   5    3.50    0.44 
   6  -3   5    3.32    0.47 
   6  -3   5    3.79    0.46 
   6   3   5    3.30    0.42 
  -6  -3  -6    7.61    0.59 
  -6   3  -6    8.54    0.63 
  -6   3  -6    8.16    0.58 
   6  -3   6    8.56    0.62 
   6  -3   6    8.96    0.68 
   6  -3   6    9.15    0.63 
   6   3   6    8.22    0.60 
  -6  -3  -7   20.84    0.83 
  -6   3  -7   20.59    0.83 
  -6   3  -7   20.40    0.80 
  -6   3  -7   20.88    0.85 
   6  -3   7   21.57    0.84 
   6  -3   7   21.96    0.89 
   6  -3   7   22.52    0.86 
   6   3   7   22.11    0.85 
  -6  -3  -8    0.37    0.34 
  -6   3  -8    0.34    0.29 
  -6   3  -8    0.20    0.32 
  -6   3  -8    0.59    0.31 
  -6   3  -8    0.09    0.32 
   6  -3   8    0.58    0.35 
   6  -3   8    0.46    0.36 
   6  -3   8    0.85    0.37 
   6   3   8    0.44    0.35 
  -6  -3  -9   14.42    0.78 
  -6   3  -9   13.35    0.71 
  -6   3  -9   13.05    0.75 
  -6   3  -9   13.75    0.73 
  -6   3  -9   13.16    0.76 
   6  -3   9   14.78    0.80 
   6  -3   9   14.06    0.84 
   6  -3   9   15.44    0.80 
   6   3   9   13.12    0.73 
   6   3   9   12.26    0.69 
  -6  -3 -10    0.25    0.35 
  -6   3 -10    0.18    0.29 
  -6   3 -10    0.16    0.33 
  -6   3 -10   -0.10    0.31 
  -6   3 -10    0.20    0.29 
  -6   3 -10    0.19    0.32 
   6  -3  10    0.25    0.37 
   6  -3  10    0.08    0.40 
   6  -3  10    0.24    0.34 
   6   3  10    0.11    0.36 
   6   3  10    0.36    0.36 
  -6  -3 -11    1.17    0.41 
  -6   3 -11    0.74    0.33 
  -6   3 -11    0.86    0.38 
  -6   3 -11    0.66    0.35 
  -6   3 -11    0.66    0.34 
  -6   3 -11    0.83    0.39 
   6  -3  11    0.71    0.39 
   6  -3  11    1.04    0.48 
   6  -3  11    1.44    0.42 
   6   3  11    0.77    0.42 
   6   3  11    1.20    0.40 
  -6  -3 -12    1.06    0.42 
  -6   3 -12    0.89    0.35 
  -6   3 -12    0.57    0.40 
  -6   3 -12    1.14    0.39 
  -6   3 -12    0.97    0.36 
  -6   3 -12    0.65    0.41 
   6  -3  12    0.64    0.41 
   6  -3  12    0.81    0.41 
   6  -3  12    1.01    0.49 
   6  -3  12    0.76    0.38 
   6   3  12    1.14    0.45 
   6   3  12    0.47    0.35 
  -6  -3 -13   27.04    1.08 
  -6   3 -13   25.67    1.03 
  -6   3 -13   27.82    1.08 
  -6   3 -13   28.70    1.07 
  -6   3 -13   26.16    0.99 
  -6   3 -13   27.49    1.07 
   6  -3  13   27.21    1.05 
   6  -3  13   28.26    1.02 
   6  -3  13   27.96    1.12 
   6  -3  13   28.24    1.07 
   6   3  13   25.26    1.06 
  -6  -3 -14    2.08    0.52 
  -6   3 -14    1.55    0.42 
  -6   3 -14    1.82    0.47 
  -6   3 -14    1.80    0.46 
  -6   3 -14    2.02    0.46 
  -6   3 -14    1.80    0.48 
   6  -3  14    1.69    0.48 
   6  -3  14    2.01    0.59 
   6  -3  14    2.12    0.50 
   6  -3  14    1.86    0.47 
   6   3  14    2.34    0.56 
  -6  -3 -15   23.91    1.07 
  -6  -3 -15   23.81    1.10 
  -6   3 -15   22.19    1.04 
  -6   3 -15   24.14    1.06 
  -6   3 -15   23.71    1.02 
  -6   3 -15   23.45    1.02 
  -6   3 -15   24.62    1.07 
   6  -3  15   25.05    1.08 
   6  -3  15   24.57    1.20 
   6  -3  15   24.63    1.08 
   6  -3  15   23.77    1.02 
   6   3  15   22.89    1.18 
  -6  -3 -16    9.60    0.82 
  -6  -3 -16   10.65    0.88 
  -6   3 -16   10.97    0.83 
  -6   3 -16   10.48    0.84 
  -6   3 -16    9.65    0.85 
  -6   3 -16   10.39    0.84 
   6  -3  16   10.16    0.88 
   6  -3  16   10.25    0.98 
   6  -3  16   11.16    0.94 
   6  -3  16   11.23    0.89 
   6   3  16   11.29    0.97 
  -6  -3 -17    1.10    0.49 
  -6  -3 -17    0.60    0.47 
  -6   3 -17    0.85    0.40 
  -6   3 -17    0.82    0.46 
  -6   3 -17    0.75    0.46 
  -6   3 -17    0.73    0.47 
   6  -3  17    1.27    0.60 
   6  -3  17    1.14    0.52 
   6   3  17    1.07    0.56 
  -6  -4  21    6.79    0.82 
  -6  -4  21    8.60    0.91 
  -6  -4  21    7.29    0.87 
  -6   4  21    7.52    0.80 
   6  -4 -21    8.15    0.95 
   6  -4 -21    7.61    0.86 
   6  -4 -21    7.39    0.78 
   6   4 -21    7.41    0.91 
   6   4 -21    6.56    0.77 
  -6  -4  20    0.95    0.53 
  -6  -4  20    0.53    0.47 
  -6  -4  20    0.62    0.54 
  -6   4  20    0.62    0.45 
  -6   4  20    0.58    0.44 
   6  -4 -20    0.52    0.52 
   6  -4 -20    0.76    0.49 
   6  -4 -20    0.27    0.41 
   6   4 -20    0.59    0.52 
   6   4 -20    1.14    0.55 
  -6  -4  19   15.76    1.03 
  -6  -4  19   16.92    1.00 
  -6  -4  19   17.23    1.10 
  -6   4  19   14.69    0.91 
  -6   4  19   16.48    0.95 
   6  -4 -19   15.78    1.02 
   6  -4 -19   15.69    0.98 
   6  -4 -19   14.30    0.91 
   6   4 -19   15.97    1.03 
   6   4 -19   16.14    1.02 
  -6  -4  18   11.96    0.98 
  -6  -4  18   13.31    0.90 
  -6  -4  18   12.78    0.98 
  -6   4  18   11.59    0.82 
  -6   4  18   12.36    0.84 
   6  -4 -18   12.32    0.92 
   6  -4 -18   12.51    0.83 
   6  -4 -18   10.52    0.81 
   6   4 -18   11.91    0.93 
   6   4 -18   12.99    0.95 
   6   4 -18   11.86    0.91 
  -6  -4  17   12.86    0.93 
  -6  -4  17   13.76    0.88 
  -6  -4  17   13.02    0.95 
  -6   4  17   12.25    0.81 
  -6   4  17   13.01    0.85 
   6  -4 -17   12.30    0.90 
   6  -4 -17   12.61    0.86 
   6  -4 -17   12.29    0.82 
   6   4 -17   13.56    0.92 
   6   4 -17   13.65    0.95 
   6   4 -17   12.57    0.90 
  -6  -4  16   66.61    1.63 
  -6  -4  16   70.18    1.48 
  -6  -4  16   68.72    1.64 
  -6   4  16   62.24    1.49 
  -6   4  16   66.82    1.54 
   6  -4 -16   68.35    1.64 
   6  -4 -16   68.17    1.59 
   6  -4 -16   63.05    1.54 
   6   4 -16   66.50    1.60 
   6   4 -16   63.10    1.58 
   6   4 -16   65.73    1.61 
  -6  -4  15   29.53    1.14 
  -6  -4  15   31.99    1.05 
  -6  -4  15   30.93    1.15 
  -6   4  15   26.65    1.02 
  -6   4  15   29.66    1.07 
   6  -4 -15   30.88    1.17 
   6  -4 -15   29.10    1.07 
   6  -4 -15   26.51    1.04 
   6   4 -15   29.21    1.14 
   6   4 -15   28.77    1.13 
   6   4 -15   29.72    1.15 
  -6  -4  14    0.72    0.42 
  -6  -4  14    1.13    0.37 
  -6  -4  14    0.18    0.39 
  -6   4  14    0.43    0.37 
  -6   4  14    0.80    0.40 
   6  -4 -14    0.65    0.43 
   6  -4 -14    0.33    0.34 
   6  -4 -14    0.20    0.36 
   6   4 -14    0.37    0.39 
   6   4 -14    0.51    0.42 
   6   4 -14    0.32    0.40 
  -6  -4  13    9.57    0.77 
  -6  -4  13    9.80    0.64 
  -6  -4  13   10.22    0.78 
  -6   4  13    8.85    0.66 
  -6   4  13    8.60    0.70 
   6  -4 -13    9.47    0.76 
   6  -4 -13    9.59    0.77 
   6  -4 -13    9.97    0.69 
   6  -4 -13    9.45    0.67 
   6   4 -13    9.41    0.72 
   6   4 -13    8.71    0.75 
   6   4 -13    9.20    0.70 
  -6  -4  12    6.48    0.68 
  -6  -4  12    6.19    0.58 
  -6  -4  12    6.74    0.68 
  -6   4  12    5.52    0.53 
  -6   4  12    6.44    0.63 
   6  -4 -12    5.77    0.70 
   6  -4 -12    6.73    0.70 
   6  -4 -12    6.74    0.59 
   6  -4 -12    5.22    0.56 
   6   4 -12    7.04    0.65 
   6   4 -12    5.47    0.67 
   6   4 -12    6.04    0.68 
  -6  -4  11    4.92    0.57 
  -6  -4  11    4.08    0.51 
  -6  -4  11    4.21    0.50 
  -6   4  11    4.35    0.47 
  -6   4  11    4.18    0.53 
   6  -4 -11    3.24    0.49 
   6  -4 -11    3.20    0.47 
   6  -4 -11    3.94    0.47 
   6  -4 -11    3.63    0.48 
   6   4 -11    3.88    0.50 
   6   4 -11    4.59    0.58 
   6   4 -11    4.94    0.58 
  -6  -4  10    2.11    0.43 
  -6  -4  10    2.42    0.37 
  -6  -4  10    2.56    0.42 
  -6   4  10    2.15    0.34 
  -6   4  10    2.41    0.45 
   6  -4 -10    1.67    0.41 
   6  -4 -10    2.45    0.46 
   6  -4 -10    2.56    0.42 
   6   4 -10    2.43    0.43 
   6   4 -10    2.30    0.48 
   6   4 -10    2.79    0.49 
  -6  -4   9    0.37    0.33 
  -6  -4   9    0.27    0.28 
  -6  -4   9    0.45    0.31 
  -6   4   9    0.58    0.28 
  -6   4   9    0.50    0.32 
   6  -4  -9    0.53    0.38 
   6  -4  -9    0.16    0.31 
   6  -4  -9    0.54    0.31 
   6   4  -9    0.46    0.32 
   6   4  -9    0.51    0.38 
   6   4  -9    0.55    0.39 
  -6  -4   8   66.37    1.32 
  -6  -4   8   68.35    1.25 
  -6   4   8   63.63    1.17 
  -6   4   8   64.08    1.34 
   6  -4  -8   65.57    1.38 
   6  -4  -8   67.13    1.38 
   6  -4  -8   66.96    1.29 
   6   4  -8   66.12    1.23 
   6   4  -8   64.94    1.36 
   6   4  -8   65.45    1.35 
  -6  -4   7   93.17    1.50 
  -6  -4   7   97.30    1.42 
  -6   4   7   91.02    1.40 
  -6   4   7   90.61    1.55 
   6  -4  -7   95.09    1.62 
   6  -4  -7   95.76    1.59 
   6   4  -7   94.37    1.41 
   6   4  -7   91.48    1.55 
  -6  -4   6    2.98    0.40 
  -6  -4   6    3.24    0.39 
  -6   4   6    2.99    0.40 
  -6   4   6    3.24    0.46 
   6  -4  -6    2.51    0.43 
   6  -4  -6    2.85    0.44 
   6   4  -6    2.89    0.38 
   6   4  -6    3.92    0.52 
  -6  -4   5    1.49    0.33 
  -6  -4   5    1.93    0.32 
  -6   4   5    1.50    0.35 
  -6   4   5    1.49    0.38 
   6  -4  -5    1.43    0.40 
   6  -4  -5    1.61    0.39 
   6   4  -5    1.87    0.33 
   6   4  -5    1.79    0.43 
  -6  -4   4    1.90    0.33 
  -6   4   4    1.71    0.36 
  -6   4   4    1.95    0.41 
   6  -4  -4    1.37    0.37 
   6  -4  -4    1.64    0.36 
  -6  -4   3   68.04    1.14 
  -6   4   3   65.76    1.27 
  -6   4   3   66.77    1.33 
   6  -4  -3   66.63    1.34 
   6  -4  -3   69.01    1.26 
  -6  -4   2    0.36    0.24 
  -6   4   2    0.05    0.30 
  -6   4   2   -0.01    0.30 
   6  -4  -2    0.35    0.35 
   6  -4  -2    0.73    0.32 
   6  -4  -2    0.14    0.30 
  -6  -4   1    0.69    0.25 
  -6   4   1    0.38    0.31 
  -6   4   1    0.54    0.35 
   6  -4  -1    0.93    0.39 
   6  -4  -1    0.77    0.32 
   6  -4  -1    0.97    0.36 
  -6  -4   0   25.18    0.66 
  -6   4   0   23.83    0.88 
  -6   4   0   24.62    0.90 
   6  -4   0   25.10    0.91 
   6  -4   0   26.51    0.80 
   6  -4   0   25.23    0.92 
  -6  -4  -1    7.91    0.43 
  -6   4  -1    8.32    0.63 
  -6   4  -1    7.82    0.63 
   6  -4   1    8.32    0.67 
   6  -4   1    8.76    0.54 
   6  -4   1    8.57    0.66 
   6   4   1    7.83    0.58 
  -6   4  -2    5.71    0.59 
  -6   4  -2    5.90    0.59 
  -6   4  -2    5.84    0.59 
   6  -4   2    5.71    0.65 
   6  -4   2    6.24    0.50 
   6  -4   2    5.91    0.62 
   6   4   2    4.99    0.52 
  -6   4  -3   -0.33    0.22 
  -6   4  -3   -0.10    0.32 
  -6   4  -3   -0.07    0.28 
  -6   4  -3    0.23    0.33 
   6  -4   3    0.23    0.35 
   6  -4   3   -0.05    0.33 
   6   4   3    0.06    0.31 
  -6   4  -4   27.26    0.91 
  -6   4  -4   28.12    0.99 
  -6   4  -4   28.11    0.98 
  -6   4  -4   27.79    0.97 
   6  -4   4   29.09    0.99 
   6  -4   4   31.31    1.01 
   6   4   4   28.63    0.94 
   6   4   4   24.52    0.89 
  -6   4  -5    0.85    0.33 
  -6   4  -5    0.80    0.37 
  -6   4  -5    0.89    0.38 
  -6   4  -5    0.65    0.34 
   6  -4   5    1.20    0.40 
   6  -4   5    1.00    0.43 
   6  -4   5    1.60    0.42 
   6   4   5    0.72    0.36 
   6   4   5    0.80    0.37 
  -6   4  -6    2.58    0.39 
  -6   4  -6    2.23    0.46 
  -6   4  -6    2.30    0.44 
  -6   4  -6    2.51    0.46 
   6  -4   6    2.99    0.48 
   6  -4   6    3.14    0.53 
   6  -4   6    3.43    0.50 
   6   4   6    2.63    0.45 
   6   4   6    2.39    0.42 
  -6  -4  -7    4.52    0.53 
  -6   4  -7    4.44    0.48 
  -6   4  -7    4.73    0.59 
  -6   4  -7    4.04    0.55 
  -6   4  -7    4.44    0.55 
   6  -4   7    4.90    0.56 
   6  -4   7    4.34    0.60 
   6  -4   7    4.44    0.55 
   6   4   7    4.58    0.54 
   6   4   7    3.34    0.50 
  -6  -4  -8   12.41    0.78 
  -6   4  -8   13.17    0.75 
  -6   4  -8   14.59    0.87 
  -6   4  -8   13.62    0.80 
  -6   4  -8   12.87    0.82 
   6  -4   8   14.02    0.81 
   6  -4   8   13.33    0.83 
   6  -4   8   13.81    0.83 
   6   4   8   12.73    0.82 
   6   4   8   12.41    0.76 
  -6  -4  -9    0.52    0.38 
  -6   4  -9    0.24    0.28 
  -6   4  -9    0.36    0.41 
  -6   4  -9    0.59    0.41 
  -6   4  -9    0.27    0.40 
   6  -4   9    0.27    0.39 
   6  -4   9    0.00    0.46 
   6  -4   9    0.73    0.42 
   6   4   9    0.47    0.41 
   6   4   9    0.02    0.36 
  -6  -4 -10   10.73    0.77 
  -6   4 -10   10.00    0.68 
  -6   4 -10    9.82    0.81 
  -6   4 -10    9.66    0.77 
  -6   4 -10   10.32    0.76 
   6  -4  10   11.97    0.83 
   6  -4  10   12.21    0.94 
   6  -4  10   10.37    0.82 
   6   4  10   10.18    0.83 
   6   4  10    8.86    0.72 
  -6  -4 -11    3.08    0.55 
  -6   4 -11    2.97    0.51 
  -6   4 -11    3.05    0.57 
  -6   4 -11    3.23    0.56 
  -6   4 -11    2.51    0.54 
   6  -4  11    3.55    0.56 
   6  -4  11    4.20    0.68 
   6  -4  11    3.46    0.55 
   6   4  11    3.15    0.59 
   6   4  11    2.11    0.46 
  -6  -4 -12    0.26    0.40 
  -6   4 -12    0.15    0.34 
  -6   4 -12    0.13    0.42 
  -6   4 -12    0.16    0.41 
  -6   4 -12    0.33    0.36 
  -6   4 -12    0.36    0.43 
   6  -4  12    0.28    0.46 
   6  -4  12    0.96    0.44 
   6  -4  12    1.06    0.55 
   6  -4  12    0.40    0.40 
   6   4  12    0.84    0.45 
   6   4  12    0.26    0.42 
  -6  -4 -13   11.20    0.88 
  -6   4 -13    9.74    0.78 
  -6   4 -13    9.81    0.86 
  -6   4 -13   10.04    0.84 
  -6   4 -13   11.71    0.80 
  -6   4 -13   11.10    0.88 
   6  -4  13   10.10    0.91 
   6  -4  13   10.78    0.83 
   6  -4  13   11.65    1.00 
   6  -4  13   11.66    0.82 
   6   4  13   11.43    0.94 
  -6  -4 -14    5.33    0.69 
  -6   4 -14    3.93    0.61 
  -6   4 -14    4.72    0.67 
  -6   4 -14    4.06    0.62 
  -6   4 -14    4.44    0.60 
  -6   4 -14    4.18    0.63 
   6  -4  14    3.73    0.63 
   6  -4  14    5.25    0.77 
   6  -4  14    4.49    0.63 
   6   4  14    3.97    0.70 
  -6  -4 -15   11.58    0.94 
  -6  -4 -15   10.39    0.92 
  -6   4 -15    9.63    0.82 
  -6   4 -15   10.49    0.90 
  -6   4 -15   10.32    0.88 
  -6   4 -15   10.41    0.85 
  -6   4 -15   10.29    0.91 
   6  -4  15   11.80    0.98 
   6  -4  15   11.18    1.06 
   6  -4  15   11.05    0.95 
   6   4  15   11.36    1.00 
  -6  -5  18    0.13    0.52 
  -6  -5  18    0.45    0.47 
  -6  -5  18    0.54    0.54 
  -6   5  18    0.16    0.45 
  -6   5  18    0.89    0.48 
   6  -5 -18    0.71    0.52 
   6  -5 -18    0.04    0.53 
   6  -5 -18    0.15    0.46 
   6  -5 -18    0.48    0.47 
   6   5 -18    0.19    0.51 
   6   5 -18    0.96    0.55 
   6   5 -18    0.39    0.54 
  -6  -5  17   26.34    1.26 
  -6  -5  17   27.93    1.14 
  -6  -5  17   28.33    1.29 
  -6   5  17   23.11    1.12 
  -6   5  17   26.64    1.17 
   6  -5 -17   27.42    1.25 
   6  -5 -17   27.68    1.29 
   6  -5 -17   25.27    1.16 
   6  -5 -17   23.29    1.13 
   6   5 -17   25.99    1.24 
   6   5 -17   25.47    1.24 
   6   5 -17   26.23    1.27 
  -6  -5  16  115.73    2.24 
  -6  -5  16  116.79    2.01 
  -6  -5  16  115.67    2.21 
  -6   5  16  101.53    2.08 
  -6   5  16  111.44    2.09 
   6  -5 -16  115.20    2.21 
   6  -5 -16  110.75    2.22 
   6  -5 -16  113.10    2.13 
   6  -5 -16  102.10    2.07 
   6   5 -16  111.52    2.17 
   6   5 -16  111.13    2.21 
   6   5 -16  112.13    2.22 
  -6  -5  15    7.91    0.86 
  -6  -5  15    8.09    0.79 
  -6  -5  15    7.62    0.85 
  -6   5  15    7.19    0.69 
  -6   5  15    7.92    0.78 
   6  -5 -15    7.79    0.85 
   6  -5 -15    8.33    0.88 
   6  -5 -15    8.05    0.76 
   6  -5 -15    7.11    0.73 
   6   5 -15    7.91    0.84 
   6   5 -15    7.42    0.85 
   6   5 -15    7.42    0.85 
  -6  -5  14   11.69    0.92 
  -6  -5  14   11.79    0.82 
  -6  -5  14   10.96    0.87 
  -6   5  14    9.72    0.78 
  -6   5  14   10.67    0.83 
   6  -5 -14   10.82    0.90 
   6  -5 -14   11.78    0.94 
   6  -5 -14   10.60    0.79 
   6  -5 -14    9.82    0.77 
   6   5 -14   10.30    0.85 
   6   5 -14   11.66    0.92 
   6   5 -14   10.29    0.88 
  -6  -5  13    0.27    0.44 
  -6  -5  13    0.12    0.46 
  -6  -5  13    0.01    0.40 
  -6   5  13    0.18    0.37 
  -6   5  13    0.33    0.39 
   6  -5 -13    0.12    0.43 
   6  -5 -13    0.05    0.44 
   6  -5 -13    0.29    0.38 
   6  -5 -13    0.25    0.36 
   6   5 -13   -0.10    0.38 
   6   5 -13    0.19    0.44 
   6   5 -13   -0.16    0.42 
  -6  -5  12   -0.20    0.39 
  -6  -5  12    0.02    0.37 
  -6   5  12   -0.39    0.34 
  -6   5  12   -0.15    0.35 
   6  -5 -12   -0.48    0.40 
   6  -5 -12    0.08    0.45 
   6  -5 -12   -0.06    0.35 
   6  -5 -12   -0.05    0.35 
   6   5 -12    0.19    0.38 
   6   5 -12    0.26    0.44 
   6   5 -12   -0.12    0.40 
  -6  -5  11    0.15    0.40 
  -6  -5  11    0.00    0.35 
  -6   5  11    0.05    0.31 
  -6   5  11   -0.17    0.36 
   6  -5 -11   -0.18    0.40 
   6  -5 -11    0.12    0.39 
   6  -5 -11    0.11    0.35 
   6  -5 -11    0.24    0.36 
   6   5 -11   -0.60    0.35 
   6   5 -11   -0.59    0.37 
   6   5 -11   -0.02    0.40 
  -6  -5  10    2.29    0.50 
  -6  -5  10    1.63    0.43 
  -6   5  10    1.69    0.46 
   6  -5 -10    2.29    0.54 
   6  -5 -10    1.92    0.52 
   6  -5 -10    2.44    0.46 
   6  -5 -10    1.75    0.42 
   6   5 -10    1.36    0.43 
   6   5 -10    1.73    0.50 
   6   5 -10    1.82    0.48 
  -6  -5   9    9.30    0.76 
  -6  -5   9    9.91    0.73 
  -6   5   9    8.84    0.63 
  -6   5   9    9.00    0.73 
   6  -5  -9    9.22    0.81 
   6  -5  -9    9.05    0.79 
   6  -5  -9   10.58    0.66 
   6  -5  -9    9.74    0.68 
   6   5  -9    9.63    0.73 
   6   5  -9    9.40    0.78 
   6   5  -9    9.73    0.78 
  -6  -5   8    3.81    0.52 
  -6  -5   8    4.27    0.51 
  -6   5   8    4.29    0.49 
  -6   5   8    4.28    0.57 
   6  -5  -8    3.73    0.55 
   6  -5  -8    3.79    0.56 
   6  -5  -8    4.11    0.50 
   6  -5  -8    4.31    0.51 
   6   5  -8    4.10    0.52 
   6   5  -8    4.06    0.57 
   6   5  -8    3.88    0.56 
  -6  -5   7   18.03    0.83 
  -6  -5   7   18.06    0.80 
  -6   5   7   17.45    0.80 
  -6   5   7   16.39    0.87 
   6  -5  -7   19.06    0.97 
   6  -5  -7   18.06    0.91 
   6   5  -7   18.06    0.79 
   6   5  -7   17.17    0.89 
   6   5  -7   18.20    0.89 
  -6  -5   6   57.09    1.29 
  -6   5   6   55.90    1.25 
  -6   5   6   55.66    1.39 
   6  -5  -6   57.32    1.45 
   6  -5  -6   57.68    1.37 
   6   5  -6   57.60    1.23 
   6   5  -6   57.75    1.35 
  -6  -5   5    0.06    0.29 
  -6   5   5   -0.01    0.32 
  -6   5   5    0.12    0.36 
   6  -5  -5    0.04    0.39 
   6  -5  -5    0.15    0.36 
   6   5  -5    0.27    0.31 
   6   5  -5    0.16    0.35 
  -6  -5   4   17.61    0.76 
  -6   5   4   17.78    0.85 
  -6   5   4   16.82    0.88 
  -6   5   4   19.10    1.23 
   6  -5  -4   18.06    0.92 
   6  -5  -4   18.10    0.85 
   6   5  -4   18.03    0.83 
  -6  -5   3    5.33    0.54 
  -6   5   3    5.72    0.65 
  -6   5   3    5.04    0.61 
  -6   5   3    5.04    0.60 
   6  -5  -3    4.52    0.56 
   6  -5  -3    5.08    0.60 
   6   5  -3    4.94    0.58 
   6   5  -3    4.21    0.50 
  -6  -5   2    7.46    0.56 
  -6   5   2    7.09    0.66 
  -6   5   2    6.91    0.69 
  -6   5   2    7.77    0.64 
   6  -5  -2    7.15    0.76 
   6  -5  -2    7.47    0.66 
   6  -5  -2    7.12    0.73 
   6   5  -2    7.09    0.61 
  -6  -5   1    0.35    0.41 
  -6   5   1    0.07    0.34 
  -6   5   1    0.12    0.38 
  -6   5   1   -0.02    0.34 
   6  -5  -1    0.11    0.41 
   6  -5  -1    0.19    0.34 
   6  -5  -1    0.05    0.38 
   6   5  -1    0.31    0.34 
  -6   5   0    1.31    0.42 
  -6   5   0    0.77    0.41 
  -6   5   0    1.09    0.40 
   6  -5   0    1.13    0.44 
   6  -5   0    1.45    0.38 
   6  -5   0    0.98    0.43 
   6   5   0    1.19    0.39 
  -6   5  -1    3.75    0.52 
  -6   5  -1    4.03    0.57 
  -6   5  -1    3.82    0.52 
   6  -5   1    4.10    0.57 
   6  -5   1    4.69    0.59 
   6   5   1    3.47    0.51 
  -6   5  -2    1.13    0.41 
  -6   5  -2    1.28    0.45 
  -6   5  -2    1.29    0.45 
   6  -5   2    1.56    0.46 
   6  -5   2    1.25    0.46 
   6   5   2    0.98    0.37 
   6   5   2    1.42    0.42 
  -6   5  -3    1.27    0.44 
  -6   5  -3    1.29    0.45 
  -6   5  -3    1.37    0.45 
   6  -5   3    1.20    0.46 
   6  -5   3    1.37    0.44 
   6   5   3    1.33    0.41 
   6   5   3    0.99    0.36 
  -6   5  -4    0.88    0.43 
  -6   5  -4    1.43    0.47 
  -6   5  -4    1.34    0.45 
   6  -5   4    1.01    0.44 
   6  -5   4    1.01    0.42 
   6   5   4    0.77    0.40 
   6   5   4    0.29    0.36 
  -6   5  -5    4.18    0.54 
  -6   5  -5    3.65    0.56 
  -6   5  -5    4.77    0.63 
  -6   5  -5    4.66    0.62 
   6  -5   5    5.68    0.63 
   6  -5   5    6.11    0.72 
   6   5   5    5.00    0.59 
   6   5   5    4.59    0.59 
  -6   5  -6    0.54    0.33 
  -6   5  -6    0.89    0.43 
  -6   5  -6    0.27    0.40 
  -6   5  -6    0.65    0.43 
   6  -5   6    0.48    0.42 
   6  -5   6    0.82    0.47 
   6  -5   6    0.68    0.45 
   6   5   6    0.63    0.36 
   6   5   6    0.73    0.42 
   6   5   6    0.82    0.41 
  -6  -5  -7    1.49    0.44 
  -6   5  -7    1.57    0.43 
  -6   5  -7    0.80    0.48 
  -6   5  -7    1.42    0.50 
  -6   5  -7    0.96    0.45 
   6  -5   7    1.55    0.49 
   6  -5   7    1.50    0.50 
   6  -5   7    1.77    0.48 
   6   5   7    0.72    0.38 
   6   5   7    1.22    0.46 
   6   5   7    1.58    0.46 
  -6  -5  -8    0.93    0.41 
  -6   5  -8    0.50    0.39 
  -6   5  -8    0.35    0.46 
  -6   5  -8    0.08    0.41 
  -6   5  -8   -0.08    0.42 
   6  -5   8    0.81    0.45 
   6  -5   8    0.61    0.45 
   6  -5   8    1.02    0.45 
   6   5   8    0.13    0.41 
   6   5   8    0.34    0.36 
  -6  -5  -9    0.69    0.41 
  -6   5  -9    0.03    0.38 
  -6   5  -9    0.37    0.47 
  -6   5  -9    0.22    0.46 
  -6   5  -9    0.39    0.45 
   6  -5   9    0.68    0.45 
   6  -5   9    0.28    0.49 
   6  -5   9    0.30    0.44 
   6   5   9    0.22    0.43 
   6   5   9    0.69    0.44 
  -6  -5 -10    0.66    0.44 
  -6   5 -10    0.73    0.43 
  -6   5 -10    0.62    0.49 
  -6   5 -10    0.56    0.47 
  -6   5 -10    0.60    0.45 
   6  -5  10    0.91    0.47 
   6  -5  10    1.10    0.59 
   6  -5  10    0.69    0.49 
   6   5  10    0.99    0.52 
   6   5  10    0.68    0.46 
  -6  -5 -11    2.46    0.54 
  -6   5 -11    2.23    0.52 
  -6   5 -11    2.49    0.60 
  -6   5 -11    2.60    0.60 
  -6   5 -11    2.65    0.60 
   6  -5  11    2.50    0.62 
   6  -5  11    2.98    0.58 
   6  -5  11    2.83    0.68 
   6  -5  11    2.63    0.58 
   6   5  11    3.39    0.65 
  -6  -5 -12    4.59    0.67 
  -6   5 -12    4.68    0.67 
  -6   5 -12    5.11    0.73 
  -6   5 -12    3.43    0.62 
  -6   5 -12    4.64    0.72 
   6  -5  12    4.63    0.70 
   6  -5  12    4.63    0.76 
   6  -5  12    5.26    0.83 
   6   5  12    4.90    0.74 
  -6  -6  13   17.96    1.10 
  -6  -6  13   17.24    1.07 
  -6   6  13   13.14    0.90 
  -6   6  13   16.09    1.00 
   6  -6 -13   15.29    1.14 
   6  -6 -13   15.81    1.10 
   6  -6 -13   16.78    0.95 
   6  -6 -13   14.63    0.96 
   6   6 -13   16.77    1.06 
   6   6 -13   15.05    1.03 
   6   6 -13   15.12    1.06 
  -6  -6  12    0.28    0.47 
  -6  -6  12   -0.41    0.41 
  -6   6  12    0.08    0.39 
  -6   6  12   -0.09    0.43 
   6  -6 -12   -0.01    0.45 
   6  -6 -12   -0.17    0.48 
   6  -6 -12    0.06    0.42 
   6  -6 -12    0.60    0.43 
   6   6 -12    0.04    0.43 
   6   6 -12    0.27    0.49 
   6   6 -12   -0.40    0.45 
  -6  -6  11    3.91    0.63 
  -6  -6  11    3.61    0.59 
  -6   6  11    3.09    0.57 
  -6   6  11    3.06    0.59 
   6  -6 -11    3.24    0.65 
   6  -6 -11    4.51    0.71 
   6  -6 -11    3.54    0.57 
   6  -6 -11    3.37    0.57 
   6   6 -11    3.84    0.62 
   6   6 -11    3.62    0.64 
   6   6 -11    3.75    0.68 
  -6  -6  10    0.41    0.43 
  -6  -6  10    0.42    0.41 
  -6   6  10    0.43    0.37 
  -6   6  10    0.68    0.45 
   6  -6 -10    0.64    0.54 
   6  -6 -10    0.13    0.49 
   6  -6 -10    0.73    0.42 
   6   6 -10    0.62    0.45 
   6   6 -10    0.96    0.50 
   6   6 -10    0.07    0.45 
  -6  -6   9    0.57    0.42 
  -6  -6   9    0.14    0.38 
  -6   6   9    0.36    0.44 
   6  -6  -9    0.12    0.48 
   6  -6  -9   -0.15    0.47 
   6  -6  -9    0.29    0.39 
   6   6  -9    0.36    0.42 
   6   6  -9    0.58    0.46 
   6   6  -9    0.58    0.44 
  -6  -6   8   -0.13    0.38 
  -6  -6   8    0.02    0.37 
  -6   6   8    0.16    0.41 
   6  -6  -8   -0.33    0.44 
   6  -6  -8   -0.16    0.44 
   6  -6  -8    0.24    0.37 
   6   6  -8    0.47    0.41 
   6   6  -8    0.42    0.45 
  -6  -6   7   11.80    0.83 
  -6  -6   7   11.35    0.78 
  -6   6   7   10.82    0.78 
  -6   6   7   11.66    0.88 
   6  -6  -7   12.77    0.99 
   6  -6  -7   12.37    0.90 
   6   6  -7   10.76    0.76 
   6   6  -7   11.44    0.86 
  -6  -6   6    4.24    0.55 
  -6   6   6    4.61    0.58 
  -6   6   6    4.31    0.63 
   6  -6  -6    4.13    0.64 
   6  -6  -6    4.11    0.62 
   6   6  -6    3.59    0.59 
  -6  -6   5    6.24    0.68 
  -6   6   5    4.52    0.58 
  -6   6   5    4.79    0.64 
   6  -6  -5    5.49    0.72 
   6  -6  -5    5.89    0.68 
   6   6  -5    5.75    0.66 
   6   6  -5    5.44    0.56 
  -6  -6   4    8.38    0.68 
  -6   6   4    8.02    0.74 
  -6   6   4    9.51    0.84 
   6  -6  -4    8.73    0.86 
   6  -6  -4    8.60    0.82 
   6   6  -4    8.49    0.75 
   6   6  -4    7.70    0.65 
  -6   6   3   13.58    0.90 
  -6   6   3   13.07    0.94 
  -6   6   3   13.54    0.84 
   6  -6  -3   13.30    0.95 
   6  -6  -3   14.98    0.90 
   6  -6  -3   15.28    1.00 
   6   6  -3   14.50    0.88 
   6   6  -3   13.10    0.78 
  -6   6   2    5.53    0.65 
  -6   6   2    4.68    0.64 
  -6   6   2    5.69    0.67 
   6  -6  -2    6.21    0.73 
   6  -6  -2    6.55    0.69 
   6  -6  -2    6.44    0.73 
   6   6  -2    5.52    0.60 
  -6   6   1    1.10    0.48 
  -6   6   1    1.28    0.51 
  -6   6   1    0.91    0.43 
   6  -6  -1    0.74    0.49 
   6  -6  -1    1.68    0.52 
   6  -6  -1    1.05    0.48 
   6   6  -1    1.37    0.43 
  -6   6   0    0.61    0.45 
  -6   6   0    1.37    0.53 
  -6   6   0    1.56    0.48 
   6  -6   0    1.12    0.51 
   6  -6   0    1.31    0.52 
   6   6   0    0.80    0.41 
  -6   6  -1    1.16    0.48 
  -6   6  -1    1.25    0.49 
  -6   6  -1    1.04    0.46 
   6  -6   1    1.60    0.53 
   6  -6   1    0.91    0.49 
   6   6   1    0.81    0.40 
  -6   6  -2    1.51    0.52 
  -6   6  -2    1.32    0.51 
  -6   6  -2    1.94    0.52 
   6  -6   2    2.36    0.55 
   6  -6   2    2.07    0.55 
   6   6   2    1.14    0.44 
  -6   6  -3   -0.03    0.43 
  -6   6  -3    0.05    0.43 
  -6   6  -3    0.28    0.44 
   6  -6   3   -0.07    0.44 
   6  -6   3    0.16    0.46 
   6   6   3   -0.13    0.36 
  -6   6  -4   -0.18    0.44 
  -6   6  -4   -0.18    0.46 
  -6   6  -4   -0.30    0.40 
   6  -6   4   -0.14    0.44 
   6  -6   4   -0.12    0.46 
   6   6   4    0.20    0.40 
  -6   6  -5    3.03    0.62 
  -6   6  -5    2.94    0.64 
  -6   6  -5    2.92    0.61 
   6  -6   5    2.86    0.58 
   6  -6   5    2.70    0.64 
   6  -6   5    3.12    0.61 
   6   6   5    2.15    0.52 
  -6   6  -6    4.31    0.70 
  -6   6  -6    5.04    0.74 
  -6   6  -6    4.24    0.67 
   6  -6   6    5.48    0.71 
   6  -6   6    5.25    0.75 
   6  -6   6    4.80    0.68 
   6   6   6    3.43    0.58 
  -6  -6  -7    4.16    0.61 
  -6   6  -7    4.06    0.70 
  -6   6  -7    4.00    0.72 
  -6   6  -7    3.61    0.63 
   6  -6   7    4.40    0.67 
   6  -6   7    3.70    0.74 
   6  -6   7    4.56    0.69 
   6   6   7    3.44    0.86 
   6   6   7    3.44    0.62 
  -6  -6  -8    8.45    0.80 
  -6   6  -8    9.04    0.96 
  -6   6  -8    9.15    0.98 
  -6   6  -8    8.04    0.90 
   6  -6   8   10.21    0.94 
   6  -6   8    9.62    1.03 
   6  -6   8    9.12    0.90 
   6   6   8    7.70    0.82 
  -7   0  25   -0.26    0.45 
   7   0 -25   -0.26    0.36 
   7   0 -25    0.02    0.40 
   7   0 -25    0.12    0.44 
   7   0 -25   -0.11    0.35 
  -7   0  24   17.81    0.96 
  -7   0  24   17.58    1.07 
   7   0 -24   16.23    0.90 
   7   0 -24   16.38    0.97 
   7   0 -24   16.80    0.98 
   7   0 -24   17.60    0.88 
  -7   0  23    0.06    0.37 
  -7   0  23    0.02    0.41 
   7   0 -23    0.16    0.39 
   7   0 -23   -0.39    0.38 
   7   0 -23   -0.30    0.32 
  -7   0  22   36.06    1.19 
  -7   0  22   37.34    1.30 
   7   0 -22   35.06    1.20 
   7   0 -22   37.02    1.22 
   7   0 -22   33.82    1.08 
  -7   0  21   -0.15    0.33 
  -7   0  21    0.14    0.42 
   7   0 -21    0.34    0.37 
   7   0 -21   -0.06    0.36 
   7   0 -21   -0.02    0.29 
  -7   0  20   18.28    0.88 
  -7   0  20   18.48    0.95 
   7   0 -20   18.57    0.85 
   7   0 -20   19.68    0.88 
   7   0 -20   18.12    0.81 
  -7   0  19   -0.08    0.31 
  -7   0  19    0.12    0.37 
   7   0 -19   -0.05    0.31 
   7   0 -19    0.09    0.34 
   7   0 -19   -0.14    0.27 
  -7   0  18    0.14    0.32 
  -7   0  18    0.10    0.33 
   7   0 -18    0.06    0.27 
   7   0 -18    0.17    0.32 
   7   0 -18    0.14    0.31 
  -7   0  17   -0.07    0.31 
  -7   0  17   -0.17    0.32 
   7   0 -17    0.13    0.26 
   7   0 -17    0.11    0.26 
   7   0 -17   -0.02    0.30 
  -7   0  16  123.95    1.74 
  -7   0  16  121.54    1.78 
   7   0 -16  125.41    1.51 
   7   0 -16  117.90    1.72 
  -7   0  15   -0.09    0.28 
  -7   0  15    0.07    0.29 
   7   0 -15   -0.07    0.23 
   7   0 -15    0.10    0.27 
  -7   0  14    1.36    0.35 
  -7   0  14    1.14    0.30 
   7   0 -14    1.42    0.29 
   7   0 -14    1.22    0.29 
  -7   0  13   -0.01    0.25 
  -7   0  13    0.04    0.23 
   7   0 -13    0.03    0.16 
   7   0 -13    0.05    0.22 
  -7   0  12   13.13    0.61 
  -7   0  12   13.62    0.61 
   7   0 -12   13.93    0.40 
  -7   0  11   -0.08    0.22 
  -7   0  11    0.05    0.23 
   7   0 -11   -0.05    0.16 
   7   0 -10    6.03    0.30 
  -7   0   9    0.01    0.22 
   7   0  -9   -0.07    0.15 
  -7   0   8   91.36    1.21 
   7   0  -8   97.95    0.92 
  -7   0   7    0.09    0.22 
   7   0  -7   -0.02    0.16 
  -7   0   6  156.09    1.47 
   7   0  -6  163.62    1.22 
  -7   0   5    0.03    0.21 
   7   0  -5    0.05    0.18 
  -7   0   4  127.39    1.27 
   7   0  -4  135.14    1.19 
  -7   0   3    0.19    0.20 
   7   0  -3    0.09    0.19 
  -7   0   2   10.63    0.45 
   7   0  -2   10.89    0.45 
  -7   0   1    0.01    0.18 
   7   0  -1    0.02    0.19 
   7   0   0    1.22    0.26 
   7   0   1   -0.24    0.20 
   7   0   2   39.39    0.83 
  -7   0  -3    0.05    0.17 
   7   0   3    0.03    0.24 
  -7   0  -4    2.77    0.31 
  -7   0  -5   -0.10    0.17 
  -7   0  -6   32.67    0.69 
  -7   0  -7   -0.08    0.17 
   7   0   7    0.05    0.23 
   7   0   7   -0.09    0.28 
  -7   0  -8    2.76    0.34 
   7   0   8    2.72    0.36 
   7   0   8    2.72    0.43 
  -7   0  -9   -0.17    0.19 
  -7   0  -9    0.13    0.28 
   7   0   9   -0.02    0.26 
   7   0   9   -0.07    0.30 
  -7   0 -10   69.27    1.04 
  -7   0 -10   69.03    1.36 
   7   0  10   70.80    1.25 
   7   0  10   70.77    1.38 
  -7   0 -11    0.20    0.32 
   7   0  11   -0.12    0.29 
   7   0  11   -0.08    0.33 
  -7   0 -12   19.27    0.82 
  -7   0 -12   18.61    0.85 
   7   0  12   18.98    0.89 
  -7   0 -13    0.14    0.30 
  -7   0 -13   -0.18    0.33 
   7   0  13    0.14    0.38 
  -7   0 -14   18.79    0.88 
  -7   0 -14   19.00    0.94 
   7   0  14   18.44    0.94 
  -7   0 -15    0.10    0.35 
  -7   0 -15    0.43    0.39 
   7   0  15    0.09    0.40 
  -7   0 -16    3.34    0.55 
  -7   0 -16    2.70    0.55 
   7   0  16    3.58    0.60 
  -7   0 -17   -0.28    0.37 
  -7   0 -17   -0.25    0.39 
   7   0  17   -0.01    0.44 
  -7   0 -18   15.15    0.95 
  -7   0 -18   16.40    1.03 
   7   0  18   17.13    1.05 
  -7  -1  25    0.65    0.45 
  -7  -1  25    0.14    0.49 
  -7   1  25    0.19    0.47 
   7  -1 -25    0.21    0.42 
   7  -1 -25    0.43    0.43 
   7   1 -25    0.25    0.42 
   7   1 -25    0.14    0.46 
  -7  -1  24    1.07    0.47 
  -7  -1  24    0.26    0.49 
  -7   1  24    0.08    0.45 
   7  -1 -24    0.76    0.46 
   7  -1 -24    1.03    0.46 
   7  -1 -24    0.48    0.39 
   7   1 -24    0.48    0.42 
   7   1 -24    0.72    0.48 
  -7  -1  23    0.59    0.42 
  -7  -1  23    0.61    0.50 
  -7   1  23    1.20    0.57 
  -7   1  23    1.06    0.47 
   7  -1 -23    0.61    0.42 
   7  -1 -23    0.77    0.43 
   7  -1 -23    0.57    0.39 
   7   1 -23    1.25    0.44 
   7   1 -23    0.84    0.45 
  -7  -1  22    0.35    0.40 
  -7  -1  22    0.35    0.44 
  -7   1  22   -0.11    0.36 
  -7   1  22    0.34    0.42 
   7  -1 -22    0.21    0.39 
   7  -1 -22    0.71    0.40 
   7  -1 -22    0.09    0.33 
   7   1 -22    0.23    0.37 
   7   1 -22    0.22    0.41 
  -7  -1  21    2.06    0.48 
  -7  -1  21    1.84    0.50 
  -7   1  21    1.85    0.44 
  -7   1  21    2.04    0.49 
   7  -1 -21    2.64    0.48 
   7  -1 -21    1.88    0.48 
   7  -1 -21    1.91    0.44 
   7  -1 -21    2.24    0.46 
   7   1 -21    2.09    0.44 
   7   1 -21    1.82    0.47 
   7   1 -21    1.65    0.39 
  -7  -1  20    0.03    0.35 
  -7  -1  20   -0.46    0.38 
  -7   1  20    0.00    0.32 
  -7   1  20    0.00    0.37 
   7  -1 -20    0.08    0.33 
   7  -1 -20    0.14    0.35 
   7  -1 -20    0.34    0.34 
   7  -1 -20   -0.31    0.30 
   7   1 -20   -0.15    0.30 
   7   1 -20   -0.17    0.35 
   7   1 -20   -0.19    0.35 
   7   1 -20   -0.02    0.30 
  -7  -1  19    1.09    0.41 
  -7  -1  19    1.05    0.44 
  -7   1  19    0.85    0.37 
  -7   1  19    0.98    0.41 
   7  -1 -19    1.42    0.38 
   7  -1 -19    1.70    0.43 
   7  -1 -19    1.18    0.37 
   7  -1 -19    1.00    0.37 
   7   1 -19    0.71    0.35 
   7   1 -19    0.89    0.39 
   7   1 -19    0.94    0.39 
  -7  -1  18   37.26    1.11 
  -7  -1  18   36.80    1.16 
  -7   1  18   36.15    1.04 
  -7   1  18   35.95    1.12 
   7  -1 -18   37.56    1.03 
   7  -1 -18   34.72    1.09 
   7  -1 -18   35.44    1.16 
   7  -1 -18   34.29    1.03 
   7   1 -18   36.13    1.06 
   7   1 -18   37.24    1.10 
  -7  -1  17   29.19    0.99 
  -7  -1  17   28.89    1.01 
  -7   1  17   28.01    0.92 
  -7   1  17   29.15    0.99 
   7  -1 -17   30.10    0.90 
   7  -1 -17   27.91    0.96 
   7   1 -17   26.84    0.91 
   7   1 -17   28.37    0.95 
  -7  -1  16    9.76    0.66 
  -7  -1  16   10.13    0.66 
  -7   1  16    9.80    0.62 
  -7   1  16   10.30    0.67 
   7  -1 -16   10.64    0.53 
   7  -1 -16   10.27    0.61 
   7  -1 -16   10.40    0.66 
   7   1 -16    9.61    0.58 
   7   1 -16   10.31    0.66 
  -7  -1  15    0.50    0.32 
  -7  -1  15    0.56    0.34 
  -7   1  15    0.20    0.29 
  -7   1  15    0.50    0.31 
   7  -1 -15    0.36    0.23 
   7  -1 -15    0.49    0.30 
   7  -1 -15    0.55    0.30 
   7   1 -15    0.31    0.28 
  -7  -1  14   -0.11    0.26 
  -7  -1  14   -0.17    0.30 
  -7   1  14    0.21    0.27 
  -7   1  14    0.03    0.26 
   7  -1 -14   -0.11    0.21 
   7  -1 -14    0.26    0.27 
   7  -1 -14    0.06    0.25 
   7   1 -14   -0.10    0.22 
  -7  -1  13   43.34    1.02 
  -7  -1  13   44.14    1.02 
  -7   1  13   42.11    0.97 
  -7   1  13   43.22    1.01 
   7  -1 -13   43.66    0.82 
   7  -1 -13   44.78    0.97 
   7  -1 -13   42.05    0.99 
   7   1 -13   40.59    1.16 
  -7  -1  12   30.13    0.86 
  -7  -1  12   30.07    0.81 
  -7   1  12   30.54    0.83 
   7  -1 -12   29.72    0.68 
   7  -1 -12   30.41    0.81 
  -7  -1  11    1.34    0.30 
  -7  -1  11    1.36    0.31 
  -7   1  11    1.20    0.30 
  -7   1  11    0.87    0.27 
   7  -1 -11    1.07    0.24 
   7  -1 -11    1.36    0.29 
  -7  -1  10    5.72    0.47 
  -7   1  10    5.99    0.46 
  -7   1  10    6.49    0.46 
   7  -1 -10    6.33    0.39 
   7  -1 -10    6.44    0.47 
  -7  -1   9   33.01    0.82 
  -7   1   9   34.20    0.81 
   7  -1  -9   34.57    0.70 
   7  -1  -9   35.13    0.81 
  -7  -1   8   65.11    1.06 
  -7   1   8   66.67    1.07 
   7  -1  -8   66.29    0.93 
   7  -1  -8   67.04    1.06 
  -7  -1   7  261.84    1.97 
  -7   1   7  258.42    2.00 
   7  -1  -7  267.84    1.80 
   7  -1  -7  267.88    2.05 
  -7  -1   6   55.54    0.92 
  -7   1   6   53.41    0.94 
   7  -1  -6   56.65    0.88 
  -7  -1   5  100.80    1.17 
  -7   1   5   98.06    1.22 
   7  -1  -5  101.09    1.14 
  -7  -1   4   19.33    0.57 
  -7   1   4   18.72    0.61 
   7  -1  -4   19.63    0.58 
  -7  -1   3  463.80    2.27 
   7  -1  -3  469.54    2.47 
  -7  -1   2    0.84    0.21 
   7  -1  -2    0.64    0.25 
  -7  -1   1    8.95    0.38 
   7  -1  -1    9.39    0.48 
  -7  -1   0    5.00    0.31 
  -7   1   0    4.90    0.39 
   7  -1   0    4.97    0.42 
  -7  -1  -1   18.25    0.44 
  -7   1  -1   16.57    0.56 
   7  -1   1   18.55    0.62 
  -7   1  -2    6.69    0.42 
  -7   1  -3    1.08    0.24 
   7  -1   3    1.58    0.32 
  -7   1  -4    8.75    0.47 
   7  -1   4    8.85    0.54 
  -7  -1  -5    0.26    0.16 
  -7   1  -5    0.40    0.22 
   7  -1   5    0.05    0.26 
   7  -1   5    0.11    0.25 
  -7  -1  -6    2.40    0.27 
  -7   1  -6    2.15    0.31 
   7  -1   6    2.22    0.36 
   7  -1   6    2.54    0.35 
   7   1   6    2.43    0.45 
  -7  -1  -7   10.81    0.40 
  -7   1  -7   10.16    0.53 
   7  -1   7   10.09    0.62 
   7  -1   7   10.89    0.57 
   7  -1   7   10.98    0.64 
   7   1   7   10.83    0.64 
  -7  -1  -8   69.76    1.30 
  -7   1  -8   70.27    1.15 
   7  -1   8   73.80    1.35 
   7  -1   8   72.80    1.24 
   7  -1   8   73.50    1.35 
   7   1   8   73.03    1.36 
  -7  -1  -9    9.86    0.65 
  -7   1  -9    8.75    0.53 
  -7   1  -9    8.97    0.68 
   7  -1   9    8.44    0.60 
   7  -1   9    9.54    0.66 
   7   1   9    8.67    0.65 
  -7  -1 -10   23.87    0.87 
  -7   1 -10   23.77    0.76 
  -7   1 -10   22.82    0.84 
   7  -1  10   24.18    0.87 
   7  -1  10   24.68    1.14 
   7  -1  10   24.29    0.91 
   7   1  10   23.20    0.91 
  -7  -1 -11    1.52    0.41 
  -7   1 -11    1.58    0.39 
  -7   1 -11    1.42    0.33 
  -7   1 -11    1.60    0.38 
   7  -1  11    1.55    0.40 
   7  -1  11    2.10    0.46 
   7   1  11    1.88    0.43 
  -7  -1 -12    1.76    0.37 
  -7  -1 -12    2.10    0.44 
  -7   1 -12    1.97    0.42 
  -7   1 -12    2.54    0.38 
  -7   1 -12    1.68    0.41 
   7  -1  12    2.55    0.47 
   7  -1  12    2.44    0.49 
   7   1  12    1.96    0.45 
  -7  -1 -13    5.67    0.58 
  -7  -1 -13    5.62    0.57 
  -7  -1 -13    5.29    0.65 
  -7   1 -13    5.48    0.59 
  -7   1 -13    5.11    0.62 
  -7   1 -13    5.34    0.54 
   7  -1  13    6.19    0.69 
   7  -1  13    5.50    0.67 
   7   1  13    6.50    0.70 
  -7  -1 -14    4.68    0.58 
  -7  -1 -14    4.10    0.51 
  -7  -1 -14    4.19    0.60 
  -7   1 -14    3.66    0.50 
  -7   1 -14    3.96    0.55 
   7  -1  14    3.68    0.55 
   7  -1  14    3.92    0.57 
   7   1  14    3.61    0.55 
  -7  -1 -15    1.56    0.45 
  -7  -1 -15    1.29    0.39 
  -7  -1 -15    0.90    0.43 
  -7   1 -15    0.78    0.39 
  -7   1 -15    1.76    0.49 
   7  -1  15    0.86    0.46 
   7  -1  15    1.64    0.48 
   7   1  15    0.82    0.46 
  -7  -1 -16   13.41    0.85 
  -7  -1 -16   12.90    0.91 
  -7   1 -16   12.98    0.86 
  -7   1 -16   12.44    0.88 
   7  -1  16   12.78    0.92 
   7  -1  16   13.41    0.94 
   7   1  16   12.90    0.94 
  -7  -1 -17    9.44    0.79 
  -7  -1 -17    8.51    0.84 
  -7   1 -17    8.20    0.72 
  -7   1 -17    9.33    0.83 
   7  -1  17   10.52    0.91 
   7  -1  17    9.68    0.86 
   7   1  17    9.53    0.90 
  -7  -1 -18   -0.08    0.37 
  -7  -1 -18    0.04    0.44 
  -7   1 -18   -0.14    0.40 
  -7   1 -18    0.10    0.42 
   7  -1  18   -0.17    0.44 
   7   1  18   -0.17    0.45 
  -7  -2  24    2.63    0.58 
  -7  -2  24    3.07    0.67 
  -7   2  24    3.26    0.61 
   7  -2 -24    2.05    0.56 
   7  -2 -24    2.05    0.52 
   7   2 -24    2.49    0.53 
   7   2 -24    1.64    0.57 
   7   2 -24    3.41    0.60 
  -7  -2  23    1.28    0.49 
  -7  -2  23    1.11    0.53 
  -7   2  23    0.73    0.45 
   7  -2 -23    0.77    0.46 
   7  -2 -23    1.14    0.51 
   7  -2 -23    0.80    0.43 
   7   2 -23    1.32    0.46 
   7   2 -23    1.65    0.54 
   7   2 -23    1.14    0.48 
  -7  -2  22   19.49    1.04 
  -7  -2  22   20.70    1.13 
  -7   2  22   19.70    1.03 
   7  -2 -22   19.77    0.98 
   7  -2 -22   19.42    1.04 
   7  -2 -22   19.16    0.96 
   7   2 -22   19.80    0.93 
   7   2 -22   19.36    1.05 
   7   2 -22   21.61    1.04 
  -7  -2  21    0.01    0.39 
  -7  -2  21    0.61    0.48 
  -7   2  21    0.47    0.41 
   7  -2 -21    0.54    0.40 
   7  -2 -21    0.42    0.42 
   7  -2 -21    0.49    0.39 
   7   2 -21    0.60    0.38 
   7   2 -21    0.17    0.43 
   7   2 -21    0.65    0.42 
  -7  -2  20    3.73    0.57 
  -7  -2  20    3.74    0.59 
  -7   2  20    3.73    0.49 
  -7   2  20    3.63    0.57 
   7  -2 -20    3.51    0.53 
   7  -2 -20    2.99    0.51 
   7  -2 -20    3.37    0.53 
   7   2 -20    3.55    0.52 
   7   2 -20    3.93    0.60 
   7   2 -20    3.66    0.56 
  -7  -2  19    4.31    0.57 
  -7  -2  19    3.78    0.56 
  -7   2  19    4.34    0.51 
  -7   2  19    3.76    0.52 
   7  -2 -19    3.89    0.52 
   7  -2 -19    3.20    0.52 
   7  -2 -19    3.01    0.48 
   7   2 -19    3.85    0.51 
   7   2 -19    3.27    0.54 
   7   2 -19    3.56    0.54 
  -7  -2  18   -0.05    0.38 
  -7  -2  18   -0.04    0.36 
  -7   2  18   -0.04    0.29 
  -7   2  18    0.07    0.33 
   7  -2 -18    0.29    0.35 
   7  -2 -18   -0.09    0.34 
   7  -2 -18   -0.13    0.30 
   7   2 -18   -0.09    0.29 
   7   2 -18   -0.08    0.35 
   7   2 -18    0.30    0.38 
  -7  -2  17    0.79    0.41 
  -7  -2  17    1.35    0.41 
  -7   2  17    1.22    0.35 
  -7   2  17    0.44    0.33 
   7  -2 -17    0.83    0.37 
   7  -2 -17    0.97    0.37 
   7  -2 -17    0.65    0.32 
   7   2 -17    0.93    0.34 
   7   2 -17    0.76    0.40 
   7   2 -17    1.11    0.41 
  -7  -2  16   12.90    0.78 
  -7  -2  16   12.09    0.71 
  -7   2  16   12.05    0.67 
  -7   2  16   12.21    0.73 
   7  -2 -16   12.81    0.66 
   7  -2 -16   12.06    0.72 
   7  -2 -16   12.83    0.72 
   7  -2 -16   11.28    0.68 
   7   2 -16   12.95    0.68 
   7   2 -16   12.41    0.75 
   7   2 -16   14.28    0.77 
  -7  -2  15   13.86    0.77 
  -7  -2  15   14.03    0.76 
  -7   2  15   14.35    0.69 
  -7   2  15   14.03    0.74 
   7  -2 -15   14.46    0.68 
   7  -2 -15   13.60    0.73 
   7   2 -15   13.70    0.68 
   7   2 -15   12.93    0.74 
   7   2 -15   13.34    0.75 
  -7  -2  14    3.97    0.50 
  -7  -2  14    4.69    0.56 
  -7   2  14    3.98    0.47 
  -7   2  14    4.20    0.49 
   7  -2 -14    4.01    0.49 
   7  -2 -14    3.75    0.46 
   7  -2 -14    4.06    0.50 
   7   2 -14    4.03    0.47 
   7   2 -14    3.73    0.47 
  -7  -2  13    1.37    0.37 
  -7  -2  13    1.57    0.34 
  -7   2  13    1.40    0.33 
  -7   2  13    1.48    0.35 
   7  -2 -13    1.63    0.33 
   7  -2 -13    1.52    0.34 
   7   2 -13    1.49    0.33 
   7   2 -13    1.55    0.37 
  -7  -2  12    7.40    0.59 
  -7  -2  12    7.04    0.56 
  -7   2  12    6.54    0.50 
  -7   2  12    6.56    0.53 
   7  -2 -12    7.07    0.51 
   7  -2 -12    6.90    0.51 
   7  -2 -12    6.92    0.51 
   7   2 -12    6.98    0.53 
  -7  -2  11   -0.17    0.26 
  -7  -2  11   -0.09    0.26 
  -7   2  11   -0.17    0.24 
  -7   2  11    0.09    0.25 
   7  -2 -11    0.12    0.24 
   7  -2 -11    0.15    0.28 
  -7  -2  10    0.29    0.27 
  -7  -2  10    0.14    0.25 
  -7   2  10    0.35    0.25 
  -7   2  10    0.12    0.22 
   7  -2 -10    0.21    0.25 
   7  -2 -10    0.42    0.28 
  -7  -2   9   23.05    0.75 
  -7   2   9   22.40    0.72 
  -7   2   9   22.47    0.73 
   7  -2  -9   23.30    0.70 
   7  -2  -9   23.34    0.76 
  -7  -2   8   75.06    1.19 
  -7   2   8   74.18    1.19 
  -7   2   8   72.91    1.17 
   7  -2  -8   75.58    1.15 
   7  -2  -8   77.73    1.23 
  -7  -2   7   12.56    0.56 
  -7   2   7   12.73    0.57 
   7  -2  -7   12.65    0.56 
   7  -2  -7   12.21    0.55 
  -7  -2   6  115.00    1.35 
  -7   2   6  111.48    1.42 
   7  -2  -6  112.51    1.38 
   7  -2  -6  115.37    1.41 
  -7  -2   5   56.04    0.94 
   7  -2  -5   56.09    1.00 
   7  -2  -5   57.92    1.02 
  -7  -2   4   85.95    1.10 
  -7   2   4   80.78    1.17 
   7  -2  -4   85.91    1.22 
   7  -2  -4   86.55    1.20 
  -7  -2   3    0.70    0.22 
  -7   2   3    0.49    0.24 
   7  -2  -3    0.54    0.26 
   7  -2  -3    0.93    0.27 
  -7  -2   2   19.36    0.53 
  -7   2   2   18.45    0.64 
   7  -2  -2   18.19    0.65 
   7  -2  -2   19.17    0.63 
  -7  -2   1   20.80    0.52 
  -7   2   1   19.32    0.63 
   7  -2  -1   20.90    0.67 
  -7  -2   0  103.78    0.99 
  -7   2   0  100.37    1.35 
   7  -2   0  103.51    1.38 
  -7  -2  -1    4.53    0.29 
  -7   2  -1    4.20    0.44 
   7  -2   1    4.16    0.42 
  -7  -2  -2    5.00    0.27 
  -7   2  -2    4.46    0.43 
   7  -2   2    5.11    0.49 
  -7  -2  -3    5.23    0.24 
  -7   2  -3    4.84    0.45 
   7  -2   3    5.42    0.51 
   7  -2   3    5.26    0.47 
  -7   2  -4    7.49    0.51 
  -7   2  -4    7.20    0.48 
   7  -2   4    8.27    0.58 
   7  -2   4    8.05    0.54 
  -7   2  -5    5.66    0.50 
  -7   2  -5    5.98    0.47 
   7  -2   5    6.28    0.56 
   7  -2   5    6.03    0.53 
   7  -2   5    6.29    0.53 
   7   2   5    6.12    0.54 
  -7  -2  -6    4.82    0.52 
  -7   2  -6    5.37    0.53 
  -7   2  -6    4.98    0.45 
   7  -2   6    5.06    0.55 
   7  -2   6    5.07    0.54 
   7  -2   6    5.52    0.58 
   7   2   6    4.46    0.54 
  -7  -2  -7   58.51    1.24 
  -7   2  -7   57.75    1.17 
  -7   2  -7   59.25    1.11 
   7  -2   7   59.02    1.23 
   7  -2   7   60.99    1.23 
   7  -2   7   59.55    1.24 
   7   2   7   59.35    1.26 
  -7  -2  -8   45.61    1.15 
  -7   2  -8   41.68    1.04 
  -7   2  -8   43.80    0.99 
   7  -2   8   43.19    1.10 
   7  -2   8   44.51    1.11 
   7  -2   8   46.88    1.15 
   7   2   8   43.88    1.15 
  -7  -2  -9    7.99    0.64 
  -7   2  -9    7.52    0.69 
  -7   2  -9    7.94    0.58 
  -7   2  -9    8.03    0.57 
  -7   2  -9    7.81    0.69 
  -7   2  -9    7.85    0.61 
   7  -2   9    8.64    0.66 
   7  -2   9    8.74    0.68 
   7  -2   9    8.34    0.66 
   7   2   9    8.42    0.69 
  -7  -2 -10    8.37    0.68 
  -7   2 -10    8.05    0.57 
  -7   2 -10    7.94    0.59 
  -7   2 -10    8.54    0.59 
  -7   2 -10    8.68    0.64 
  -7   2 -10    7.78    0.61 
   7  -2  10    8.83    0.68 
   7  -2  10    9.06    0.71 
   7  -2  10    9.64    0.73 
   7   2  10    8.71    0.72 
  -7  -2 -11   16.62    0.85 
  -7   2 -11   17.10    0.78 
  -7   2 -11   17.05    0.78 
  -7   2 -11   19.02    0.78 
  -7   2 -11   17.45    0.82 
  -7   2 -11   17.45    0.80 
   7  -2  11   18.72    0.87 
   7  -2  11   18.44    0.89 
   7  -2  11   17.90    0.90 
   7   2  11   17.44    0.90 
  -7  -2 -12    2.97    0.51 
  -7   2 -12    3.13    0.51 
  -7   2 -12    2.41    0.42 
  -7   2 -12    3.07    0.44 
  -7   2 -12    3.13    0.49 
  -7   2 -12    2.76    0.47 
   7  -2  12    3.13    0.54 
   7  -2  12    2.58    0.48 
   7   2  12    2.91    0.55 
   7   2  12    2.30    0.43 
  -7  -2 -13    0.27    0.37 
  -7   2 -13    0.12    0.34 
  -7   2 -13   -0.01    0.31 
  -7   2 -13    0.25    0.34 
  -7   2 -13    0.03    0.34 
  -7   2 -13    0.23    0.34 
   7  -2  13   -0.13    0.35 
   7  -2  13    0.43    0.43 
   7  -2  13    0.49    0.37 
   7  -2  13   -0.15    0.37 
   7   2  13   -0.01    0.41 
   7   2  13    0.25    0.33 
  -7  -2 -14    2.72    0.47 
  -7  -2 -14    3.07    0.57 
  -7   2 -14    2.55    0.50 
  -7   2 -14    3.23    0.50 
  -7   2 -14    3.73    0.50 
  -7   2 -14    2.86    0.51 
  -7   2 -14    2.66    0.49 
   7  -2  14    2.45    0.53 
   7  -2  14    3.66    0.53 
   7  -2  14    3.31    0.56 
   7   2  14    2.67    0.52 
  -7  -2 -15   13.33    0.82 
  -7  -2 -15   12.35    0.79 
  -7  -2 -15   13.63    0.92 
  -7   2 -15   11.84    0.82 
  -7   2 -15   12.23    0.77 
  -7   2 -15   13.60    0.87 
  -7   2 -15   14.10    0.85 
   7  -2  15   14.10    0.97 
   7  -2  15   12.68    1.37 
   7  -2  15   13.53    0.90 
   7   2  15   12.89    0.95 
  -7  -2 -16    2.24    0.50 
  -7  -2 -16    2.39    0.50 
  -7  -2 -16    2.44    0.54 
  -7   2 -16    2.46    0.52 
  -7   2 -16    1.88    0.49 
  -7   2 -16    3.32    0.53 
   7  -2  16    3.15    0.63 
   7  -2  16    2.55    0.56 
   7   2  16    1.94    0.55 
  -7  -2 -17    2.19    0.52 
  -7  -2 -17    2.26    0.50 
  -7  -2 -17    1.32    0.52 
  -7   2 -17    2.40    0.53 
  -7   2 -17    2.12    0.54 
   7  -2  17    2.51    0.63 
   7  -2  17    1.85    0.54 
   7   2  17    2.04    0.60 
  -7  -3  22    7.48    0.93 
  -7  -3  22    8.24    0.95 
  -7   3  22    8.29    0.86 
   7  -3 -22    8.52    0.88 
   7  -3 -22    7.47    0.76 
   7  -3 -22    7.13    0.75 
   7   3 -22    7.82    0.89 
   7   3 -22    7.86    0.88 
  -7  -3  21   19.20    1.13 
  -7  -3  21   17.90    1.12 
  -7   3  21   18.61    1.01 
   7  -3 -21   18.64    1.02 
   7  -3 -21   19.03    1.04 
   7  -3 -21   17.38    0.96 
   7   3 -21   17.68    0.90 
   7   3 -21   17.27    1.06 
   7   3 -21   18.15    1.02 
  -7  -3  20    0.09    0.44 
  -7  -3  20    0.08    0.46 
  -7   3  20    0.00    0.37 
  -7   3  20    0.26    0.41 
   7  -3 -20    0.05    0.42 
   7  -3 -20   -0.14    0.39 
   7  -3 -20   -0.13    0.36 
   7   3 -20    0.18    0.36 
   7   3 -20    0.14    0.43 
   7   3 -20   -0.04    0.40 
  -7  -3  19    0.70    0.47 
  -7  -3  19    1.01    0.49 
  -7   3  19    0.99    0.43 
  -7   3  19    0.79    0.41 
   7  -3 -19    0.57    0.41 
   7  -3 -19    0.96    0.43 
   7  -3 -19    1.03    0.44 
   7   3 -19    0.94    0.38 
   7   3 -19    0.65    0.42 
   7   3 -19    0.93    0.45 
  -7  -3  18    0.01    0.40 
  -7  -3  18   -0.34    0.34 
  -7  -3  18    0.26    0.43 
  -7   3  18   -0.11    0.35 
  -7   3  18    0.34    0.36 
   7  -3 -18   -0.04    0.36 
   7  -3 -18   -0.02    0.32 
   7  -3 -18   -0.26    0.34 
   7   3 -18    0.14    0.34 
   7   3 -18    0.01    0.40 
   7   3 -18   -0.13    0.40 
  -7  -3  17    7.15    0.80 
  -7  -3  17    7.81    0.69 
  -7  -3  17    7.98    0.77 
  -7   3  17    7.14    0.61 
  -7   3  17    6.86    0.68 
   7  -3 -17    9.49    0.76 
   7  -3 -17    7.67    0.70 
   7  -3 -17    6.89    0.63 
   7   3 -17    7.73    0.64 
   7   3 -17    7.43    0.74 
   7   3 -17    7.70    0.74 
  -7  -3  16    0.09    0.39 
  -7  -3  16    0.43    0.34 
  -7  -3  16    0.64    0.41 
  -7   3  16    0.23    0.33 
  -7   3  16    0.10    0.34 
   7  -3 -16    0.33    0.34 
   7  -3 -16    0.02    0.35 
   7  -3 -16    0.33    0.35 
   7  -3 -16    0.25    0.35 
   7   3 -16    0.16    0.31 
   7   3 -16    0.11    0.37 
   7   3 -16    0.36    0.40 
  -7  -3  15    2.82    0.49 
  -7  -3  15    3.07    0.43 
  -7  -3  15    3.67    0.54 
  -7   3  15    2.60    0.44 
   7  -3 -15    3.17    0.49 
   7  -3 -15    2.78    0.49 
   7  -3 -15    2.84    0.44 
   7  -3 -15    3.24    0.49 
   7   3 -15    3.22    0.45 
   7   3 -15    3.09    0.53 
   7   3 -15    2.98    0.52 
  -7  -3  14   11.84    0.77 
  -7  -3  14   11.16    0.64 
  -7  -3  14   10.86    0.74 
  -7   3  14   10.61    0.70 
   7  -3 -14   11.58    0.73 
   7  -3 -14   11.05    0.74 
   7  -3 -14   10.41    0.68 
   7  -3 -14   10.18    0.65 
   7   3 -14   10.86    0.63 
   7   3 -14   11.11    0.75 
   7   3 -14   11.52    0.77 
  -7  -3  13   60.48    1.35 
  -7  -3  13   63.24    1.14 
  -7  -3  13   62.30    1.32 
  -7   3  13   60.31    1.10 
  -7   3  13   57.54    1.29 
   7  -3 -13   59.76    1.27 
   7  -3 -13   60.39    1.34 
   7  -3 -13   58.57    1.26 
   7  -3 -13   56.51    1.97 
   7   3 -13   59.46    1.21 
   7   3 -13   60.63    1.35 
   7   3 -13   61.71    1.36 
  -7  -3  12   -0.23    0.32 
  -7  -3  12    0.26    0.27 
  -7  -3  12   -0.02    0.32 
  -7   3  12   -0.04    0.23 
  -7   3  12   -0.22    0.27 
   7  -3 -12   -0.12    0.30 
   7  -3 -12   -0.19    0.31 
   7  -3 -12    0.15    0.28 
   7   3 -12   -0.18    0.30 
   7   3 -12   -0.08    0.26 
   7   3 -12   -0.19    0.29 
   7   3 -12    0.12    0.35 
  -7  -3  11    7.15    0.64 
  -7  -3  11    7.56    0.49 
  -7  -3  11    7.54    0.59 
  -7   3  11    6.31    0.48 
  -7   3  11    6.53    0.53 
   7  -3 -11    6.92    0.61 
   7  -3 -11    6.90    0.61 
   7  -3 -11    6.62    0.53 
   7   3 -11    6.50    0.57 
   7   3 -11    6.86    0.52 
   7   3 -11    6.60    0.62 
   7   3 -11    6.88    0.76 
  -7  -3  10    3.75    0.47 
  -7  -3  10    4.13    0.45 
  -7   3  10    3.69    0.43 
  -7   3  10    3.37    0.45 
   7  -3 -10    3.02    0.42 
   7  -3 -10    3.49    0.46 
   7  -3 -10    3.58    0.43 
   7   3 -10    4.41    0.47 
   7   3 -10    3.50    0.44 
   7   3 -10    3.10    0.45 
  -7  -3   9    6.19    0.55 
  -7  -3   9    6.85    0.51 
  -7   3   9    5.93    0.46 
  -7   3   9    6.10    0.55 
   7  -3  -9    6.59    0.59 
   7  -3  -9    6.08    0.52 
   7   3  -9    6.56    0.51 
   7   3  -9    6.61    0.59 
  -7  -3   8   15.45    0.70 
  -7  -3   8   16.61    0.64 
  -7   3   8   15.21    0.62 
  -7   3   8   15.15    0.70 
   7  -3  -8   14.74    0.70 
   7  -3  -8   16.04    0.72 
   7   3  -8   15.17    0.63 
  -7  -3   7   17.12    0.68 
  -7   3   7   16.45    0.64 
  -7   3   7   16.66    0.72 
   7  -3  -7   15.99    0.71 
   7  -3  -7   15.96    0.67 
  -7  -3   6    0.98    0.29 
  -7   3   6    0.43    0.27 
  -7   3   6    0.77    0.28 
   7  -3  -6    0.72    0.29 
   7  -3  -6    1.13    0.33 
  -7  -3   5    0.30    0.24 
  -7   3   5    0.15    0.24 
  -7   3   5    0.20    0.27 
   7  -3  -5    0.23    0.29 
   7  -3  -5    0.29    0.26 
   7  -3  -5    0.36    0.37 
  -7  -3   4    0.78    0.25 
  -7   3   4    0.44    0.27 
  -7   3   4    0.56    0.29 
   7  -3  -4    0.76    0.34 
   7  -3  -4    0.64    0.30 
   7  -3  -4    0.66    0.39 
  -7  -3   3   74.92    1.08 
  -7   3   3   72.76    1.25 
  -7   3   3   76.09    1.28 
   7  -3  -3   76.12    1.31 
   7  -3  -3   76.99    1.22 
   7  -3  -3   76.74    1.49 
  -7  -3   2    6.64    0.41 
  -7   3   2    6.42    0.52 
  -7   3   2    6.57    0.52 
   7  -3  -2    6.55    0.57 
   7  -3  -2    6.86    0.49 
   7  -3  -2    5.85    0.56 
  -7  -3   1   14.07    0.49 
  -7   3   1   13.92    0.65 
  -7   3   1   14.17    0.65 
   7  -3  -1   13.87    0.68 
   7  -3  -1   14.13    0.61 
   7  -3  -1   15.04    0.70 
  -7  -3   0    2.08    0.25 
  -7   3   0    2.11    0.37 
  -7   3   0    2.51    0.38 
   7  -3   0    1.86    0.38 
   7  -3   0    2.09    0.35 
   7  -3   0    1.81    0.37 
  -7  -3  -1    4.99    0.33 
  -7   3  -1    4.44    0.51 
  -7   3  -1    4.79    0.50 
   7  -3   1    4.38    0.54 
   7  -3   1    4.69    0.50 
  -7  -3  -2    0.73    0.22 
  -7   3  -2    1.11    0.34 
  -7   3  -2    0.41    0.28 
   7  -3   2    0.75    0.35 
   7  -3   2    0.32    0.30 
  -7   3  -3    2.10    0.41 
  -7   3  -3    2.68    0.40 
   7  -3   3    2.64    0.44 
   7  -3   3    2.61    0.40 
   7   3   3    2.65    0.38 
  -7   3  -4    0.80    0.36 
  -7   3  -4    1.25    0.34 
   7  -3   4    1.43    0.40 
   7  -3   4    1.11    0.37 
   7  -3   4    0.66    0.32 
   7   3   4    1.01    0.31 
  -7   3  -5    0.48    0.33 
  -7   3  -5    0.33    0.29 
  -7   3  -5    0.25    0.29 
   7  -3   5    0.59    0.36 
   7  -3   5    0.15    0.35 
   7  -3   5    0.33    0.34 
   7   3   5    0.62    0.32 
  -7  -3  -6    8.19    0.64 
  -7   3  -6    8.16    0.65 
  -7   3  -6    7.66    0.59 
  -7   3  -6    8.15    0.64 
   7  -3   6    7.91    0.66 
   7  -3   6    7.89    0.67 
   7  -3   6    8.35    0.68 
   7   3   6    8.05    0.64 
  -7  -3  -7   11.77    0.72 
  -7   3  -7   12.04    0.65 
  -7   3  -7   12.05    0.72 
  -7   3  -7   11.78    0.68 
  -7   3  -7   12.05    0.73 
   7  -3   7   12.36    0.75 
   7  -3   7   11.66    0.78 
   7  -3   7   12.31    0.76 
   7   3   7   12.40    0.74 
   7   3   7    9.24    0.68 
  -7  -3  -8   60.55    1.38 
  -7   3  -8   57.98    1.33 
  -7   3  -8   59.05    1.34 
  -7   3  -8   60.38    1.29 
  -7   3  -8   57.96    1.35 
   7  -3   8   61.10    1.37 
   7  -3   8   62.36    1.42 
   7  -3   8   63.39    1.38 
   7   3   8   58.40    1.37 
   7   3   8   51.96    1.24 
  -7  -3  -9    2.07    0.43 
  -7   3  -9    2.87    0.47 
  -7   3  -9    1.66    0.41 
  -7   3  -9    2.55    0.44 
  -7   3  -9    2.37    0.39 
  -7   3  -9    2.40    0.46 
   7  -3   9    2.19    0.47 
   7  -3   9    2.02    0.46 
   7  -3   9    2.67    0.49 
   7   3   9    1.99    0.44 
   7   3   9    1.81    0.40 
  -7  -3 -10   -0.08    0.35 
  -7   3 -10    0.21    0.33 
  -7   3 -10    0.36    0.35 
  -7   3 -10    0.52    0.33 
  -7   3 -10   -0.29    0.27 
  -7   3 -10    0.17    0.34 
   7  -3  10   -0.11    0.35 
   7  -3  10    0.10    0.40 
   7  -3  10   -0.07    0.37 
   7   3  10    0.05    0.36 
   7   3  10    0.17    0.36 
  -7  -3 -11    0.60    0.39 
  -7   3 -11    0.34    0.35 
  -7   3 -11    0.49    0.36 
  -7   3 -11    0.77    0.36 
  -7   3 -11    0.70    0.33 
  -7   3 -11    0.55    0.39 
   7  -3  11    0.74    0.41 
   7  -3  11    0.54    0.46 
   7  -3  11    0.63    0.42 
   7   3  11    0.86    0.42 
   7   3  11    0.50    0.38 
  -7  -3 -12    0.65    0.41 
  -7   3 -12    0.53    0.38 
  -7   3 -12    0.81    0.41 
  -7   3 -12    0.63    0.38 
  -7   3 -12    0.59    0.36 
  -7   3 -12    0.58    0.41 
   7  -3  12    0.63    0.43 
   7  -3  12    0.33    0.46 
   7  -3  12    0.03    0.38 
   7   3  12    0.37    0.43 
   7   3  12    0.32    0.37 
  -7  -3 -13   23.40    1.07
[truncated: 380,649 more chars]
