# Supplementary material for: Rapid functionalization of multiple C–H bonds in unprotected alicyclic amines
Source: Springer Nature journal article supplement (doi:10.1038/s41557-020-0438-z), 2020-03-30
Supplement: 41557_2020_438_MOESM130_ESM.mol [file 41557_2020_438_MOESM130_ESM.mol]

nchem.19081579B-comp13a.mol
  ChemDraw02072011162D

 19 21  0  0  1  0  0  0  0  0999 V2000
   -1.7862   -0.2062    0.0000 C   0  0  0  0  0  0  0  0  0  0  0  0
   -1.7862   -1.0313    0.0000 C   0  0  0  0  0  0  0  0  0  0  0  0
   -1.0717   -1.4437    0.0000 N   0  0  0  0  0  0  0  0  0  0  0  0
   -0.3572   -1.0313    0.0000 C   0  0  0  0  0  0  0  0  0  0  0  0
   -0.3572   -0.2062    0.0000 C   0  0  0  0  0  0  0  0  0  0  0  0
   -1.0717    0.2062    0.0000 C   0  0  0  0  0  0  0  0  0  0  0  0
    0.3572   -1.4437    0.0000 C   0  0  0  0  0  0  0  0  0  0  0  0
    0.3572    0.2062    0.0000 C   0  0  0  0  0  0  0  0  0  0  0  0
    0.3572    1.0313    0.0000 C   0  0  0  0  0  0  0  0  0  0  0  0
    0.3572   -2.2687    0.0000 C   0  0  0  0  0  0  0  0  0  0  0  0
    1.0717   -2.6812    0.0000 C   0  0  0  0  0  0  0  0  0  0  0  0
    1.7862   -2.2687    0.0000 C   0  0  0  0  0  0  0  0  0  0  0  0
    1.7862   -1.4437    0.0000 C   0  0  0  0  0  0  0  0  0  0  0  0
    1.0717   -1.0313    0.0000 C   0  0  0  0  0  0  0  0  0  0  0  0
    1.0717    1.4437    0.0000 C   0  0  0  0  0  0  0  0  0  0  0  0
    1.0717    2.2687    0.0000 C   0  0  0  0  0  0  0  0  0  0  0  0
    0.3572    2.6812    0.0000 C   0  0  0  0  0  0  0  0  0  0  0  0
   -0.3572    2.2687    0.0000 C   0  0  0  0  0  0  0  0  0  0  0  0
   -0.3572    1.4437    0.0000 C   0  0  0  0  0  0  0  0  0  0  0  0
  1  2  1  0      
  2  3  1  0      
  3  4  1  0      
  4  5  1  0      
  5  6  1  0      
  6  1  1  0      
  4  7  1  1      
  5  8  1  6      
  8  9  1  0      
  7 10  2  0      
 10 11  1  0      
 11 12  2  0      
 12 13  1  0      
 13 14  2  0      
 14  7  1  0      
  9 15  2  0      
 15 16  1  0      
 16 17  2  0      
 17 18  1  0      
 18 19  2  0      
 19  9  1  0      
M  END
