# Supplementary material for: Rapid functionalization of multiple C–H bonds in unprotected alicyclic amines
Source: Springer Nature journal article supplement (doi:10.1038/s41557-020-0438-z), 2020-03-30
Supplement: 41557_2020_438_MOESM186_ESM.cif [file 41557_2020_438_MOESM186_ESM.cif]

data_weij3

# start Validation Reply Form 
_vrf_PLAT934_weij3 
; 
PROBLEM: Number of (Iobs-Icalc)/SigmaW > 10 Outliers .... 
         5 Check 
RESPONSE: Everything about the data looks very nice. Checked for any twinning
 but none was found.
; 
# end Validation Reply Form


_audit_update_record
;
2019-05-13 # Formatted by publCIF

;

# publcif _publ_body_element loop start
loop_
_publ_body_element
_publ_body_title
_publ_body_contents

 section 
;
Introduction
; 
;

;
 section 
;
Experimental
; 
;

;
 subsection 
;
Synthesis and crystallization
; 
;

;
 subsection 
;
Refinement
;
;
Crystal data, data collection and structure refinement details are summarized
in Table 1.
;

 section 
;
Results and discussion
; 
;

;
# publcif _publ_body_element loop end
 
_audit_creation_method            'SHELXL-2014/7'
_shelx_SHELXL_version_number      '2014/7'
_chemical_name_systematic         ?
_chemical_name_common             ?
_chemical_melting_point           ?
_chemical_formula_moiety          ?
_chemical_formula_sum
 'C20 H25 N' 
_chemical_formula_weight          279.41

loop_
 _atom_type_symbol
 _atom_type_description
 _atom_type_scat_dispersion_real
 _atom_type_scat_dispersion_imag
 _atom_type_scat_source
 'C'  'C'   0.0033   0.0016
 'International Tables Vol C Tables 4.2.6.8 and 6.1.1.4'
 'H'  'H'   0.0000   0.0000
 'International Tables Vol C Tables 4.2.6.8 and 6.1.1.4'
 'N'  'N'   0.0061   0.0033
 'International Tables Vol C Tables 4.2.6.8 and 6.1.1.4'
 
_space_group_crystal_system       orthorhombic
_space_group_IT_number            19
_space_group_name_H-M_alt         'P 21 21 21'
_space_group_name_Hall            'P 2ac 2ab'
 
_shelx_space_group_comment
;
The symmetry employed for this shelxl refinement is uniquely defined
by the following loop, which should always be used as a source of
symmetry information in preference to the above space-group names.
They are only intended as comments.
;
 
loop_
 _space_group_symop_operation_xyz
 'x, y, z'
 'x+1/2, -y+1/2, -z'
 '-x, y+1/2, -z+1/2'
 '-x+1/2, -y, z+1/2'
 
_cell_length_a                    5.3984(14)
_cell_length_b                    14.114(4)
_cell_length_c                    20.889(7)
_cell_angle_alpha                 90
_cell_angle_beta                  90
_cell_angle_gamma                 90
_cell_volume                      1591.6(8)
_cell_formula_units_Z             4
_cell_measurement_temperature     100(2)
_cell_measurement_reflns_used     9348 
_cell_measurement_theta_min       2.0 
_cell_measurement_theta_max       28.0 
 
_exptl_crystal_description        needle 
_exptl_crystal_colour             colourless 
_exptl_crystal_density_meas       .
_exptl_crystal_density_method     ?
_exptl_crystal_density_diffrn     1.166          
_exptl_crystal_F_000              608
_exptl_transmission_factor_min    0.6826  
_exptl_transmission_factor_max    0.7466
_exptl_crystal_size_max           0.318
_exptl_crystal_size_mid           0.089
_exptl_crystal_size_min           0.042
_exptl_absorpt_coefficient_mu     0.067
_shelx_estimated_absorpt_T_min    0.979
_shelx_estimated_absorpt_T_max    0.997
_exptl_absorpt_correction_type    multi-scan
_exptl_absorpt_correction_T_min  0.9883
_exptl_absorpt_correction_T_max  0.9974
_exptl_absorpt_process_details   
'Sheldrick, G. M., sadabs (2014). Acta Cryst. C71, 3--8.'

_diffrn_ambient_temperature       100(2) 
_diffrn_radiation_wavelength      0.71073 
_diffrn_radiation_type            MoK\a 
_diffrn_source               'I\mS microsource 3.0'  
_diffrn_measurement_device_type   'Bruker D8 Venture' 
_diffrn_measurement_method        'phi and omega scans'
_diffrn_detector_area_resol_mean  ? 
_diffrn_reflns_number             38352
_diffrn_reflns_av_unetI/netI      0.0424
_diffrn_reflns_av_R_equivalents   0.1059
_diffrn_reflns_limit_h_min        -6
_diffrn_reflns_limit_h_max        7
_diffrn_reflns_limit_k_min        -18
_diffrn_reflns_limit_k_max        18
_diffrn_reflns_limit_l_min        -27
_diffrn_reflns_limit_l_max        27
_diffrn_reflns_theta_min          2.426
_diffrn_reflns_theta_max          27.494
_diffrn_reflns_theta_full         25.000
_diffrn_measured_fraction_theta_max   0.997
_diffrn_measured_fraction_theta_full  0.996
_diffrn_reflns_Laue_measured_fraction_max    0.997
_diffrn_reflns_Laue_measured_fraction_full   0.996
_diffrn_reflns_point_group_measured_fraction_max   0.998
_diffrn_reflns_point_group_measured_fraction_full  0.998
_reflns_number_total              3629
_reflns_number_gt                 3168
_reflns_threshold_expression      'I > 2\s(I)'
_reflns_Friedel_coverage          0.713
_reflns_Friedel_fraction_max      1.000
_reflns_Friedel_fraction_full     1.000
 
_reflns_special_details
;
 Reflections were merged by SHELXL according to the crystal
 class for the calculation of statistics and refinement.
 
 _reflns_Friedel_fraction is defined as the number of unique
 Friedel pairs measured divided by the number that would be
 possible theoretically, ignoring centric projections and
 systematic absences.
;
 
_computing_data_collection        'Bruker APEX3 (Bruker, 2014)' 
_computing_cell_refinement        'Bruker APEX3 (Bruker, 2014)' 
_computing_data_reduction         'Bruker Apex3 SAINT (Bruker, 2014)' 
_computing_structure_solution     'SHELXL2014/7, Sheldrick G. M. 2014' 
_computing_structure_refinement   'SHELXL2014/7, Sheldrick G. M. 2014'
_computing_molecular_graphics     'XP in SHELXTL-plus, Bruker 2014' 
_computing_publication_material   'SHELXL2014/7, Sheldrick, G. M. 2014'
_refine_special_details           
;
All H atoms were positioned geometrically ( C---H = 0.93/1.00 \%A) and   
allowed to ride with <i>U</i>~iso~(H)= 1.2/1.5<i>U</i>~eq~(C).
Methyl ones were allowed to rotate around the corresponding C---C.

The N1 proton, H1, was obtained from a Difference Fourier map and refined
 freely.  
;
_refine_ls_structure_factor_coef  Fsqd
_refine_ls_matrix_type            full
_refine_ls_weighting_scheme       calc
_refine_ls_weighting_details
'w=1/[\s^2^(Fo^2^)+(0.0723P)^2^] where P=(Fo^2^+2Fc^2^)/3'
_atom_sites_solution_primary      direct
_atom_sites_solution_secondary    difmap
_atom_sites_solution_hydrogens    mixed
_refine_ls_hydrogen_treatment     mixed
_refine_ls_extinction_method      none
_refine_ls_extinction_coef        .
_refine_ls_abs_structure_details
;
 Flack x determined using 1204 quotients [(I+)-(I-)]/[(I+)+(I-)]
 (Parsons, Flack and Wagner, Acta Cryst. B69 (2013) 249-259).
;
_refine_ls_abs_structure_Flack    -1.3(10)
_chemical_absolute_configuration  rm
_refine_ls_number_reflns          3629
_refine_ls_number_parameters      194
_refine_ls_number_restraints      0
_refine_ls_R_factor_all           0.0581
_refine_ls_R_factor_gt            0.0479
_refine_ls_wR_factor_ref          0.1356
_refine_ls_wR_factor_gt           0.1277
_refine_ls_goodness_of_fit_ref    1.193
_refine_ls_restrained_S_all       1.193
_refine_ls_shift/su_max           0.025
_refine_ls_shift/su_mean          0.002
 
loop_
 _atom_site_label
 _atom_site_type_symbol
 _atom_site_fract_x
 _atom_site_fract_y
 _atom_site_fract_z
 _atom_site_U_iso_or_equiv
 _atom_site_adp_type
 _atom_site_occupancy
 _atom_site_site_symmetry_order  
 _atom_site_calc_flag
 _atom_site_refinement_flags_posn
 _atom_site_refinement_flags_adp
 _atom_site_refinement_flags_occupancy
 _atom_site_disorder_assembly
 _atom_site_disorder_group
N1 N 0.3610(4) 0.26988(16) 0.25777(10) 0.0220(5) Uani 1 1 d . . . . .
H1 H 0.286(7) 0.218(3) 0.274(2) 0.051(11) Uiso 1 1 d . . . . .
C2 C 0.5867(4) 0.28638(17) 0.29706(12) 0.0191(5) Uani 1 1 d . . . . .
H2A H 0.7349 0.2742 0.2695 0.023 Uiso 1 1 calc R U . . .
C3 C 0.5982(4) 0.38997(17) 0.32024(12) 0.0178(5) Uani 1 1 d . . . . .
H3A H 0.4648 0.3970 0.3531 0.021 Uiso 1 1 calc R U . . .
C4 C 0.5440(5) 0.46411(17) 0.26807(12) 0.0205(5) Uani 1 1 d . . . . .
H4A H 0.3750 0.4519 0.2516 0.025 Uiso 1 1 calc R U . . .
H4B H 0.5408 0.5271 0.2889 0.025 Uiso 1 1 calc R U . . .
C5 C 0.7182(5) 0.47058(18) 0.21040(13) 0.0241(6) Uani 1 1 d . . . . .
H5A H 0.8886 0.4803 0.2267 0.029 Uiso 1 1 calc R U . . .
H5B H 0.6729 0.5278 0.1856 0.029 Uiso 1 1 calc R U . . .
C6 C 0.7227(5) 0.38552(19) 0.16394(13) 0.0255(6) Uani 1 1 d . . . . .
H6A H 0.7953 0.4069 0.1229 0.031 Uiso 1 1 calc R U . . .
H6B H 0.8344 0.3366 0.1819 0.031 Uiso 1 1 calc R U . . .
C7 C 0.4709(5) 0.3392(2) 0.14992(13) 0.0265(6) Uani 1 1 d . . . . .
H7A H 0.3397 0.3871 0.1569 0.032 Uiso 1 1 calc R U . . .
H7B H 0.4665 0.3213 0.1041 0.032 Uiso 1 1 calc R U . . .
C8 C 0.4088(5) 0.25171(18) 0.18979(13) 0.0255(6) Uani 1 1 d . . . . .
H8A H 0.2607 0.2209 0.1711 0.031 Uiso 1 1 calc R U . . .
H8B H 0.5480 0.2063 0.1864 0.031 Uiso 1 1 calc R U . . .
C9 C 0.5942(4) 0.21733(16) 0.35303(12) 0.0197(5) Uani 1 1 d . . . . .
C10 C 0.7791(5) 0.14864(18) 0.35681(14) 0.0245(6) Uani 1 1 d . . . . .
H10A H 0.9020 0.1455 0.3243 0.029 Uiso 1 1 calc R U . . .
C11 C 0.7866(5) 0.08450(19) 0.40749(15) 0.0289(6) Uani 1 1 d . . . . .
H11A H 0.9153 0.0387 0.4096 0.035 Uiso 1 1 calc R U . . .
C12 C 0.6071(5) 0.0873(2) 0.45481(14) 0.0301(6) Uani 1 1 d . . . . .
H12A H 0.6108 0.0432 0.4891 0.036 Uiso 1 1 calc R U . . .
C13 C 0.4217(5) 0.1553(2) 0.45158(14) 0.0310(6) Uani 1 1 d . . . . .
H13A H 0.2982 0.1579 0.4839 0.037 Uiso 1 1 calc R U . . .
C14 C 0.4161(5) 0.21948(19) 0.40134(13) 0.0260(6) Uani 1 1 d . . . . .
H14A H 0.2885 0.2658 0.3998 0.031 Uiso 1 1 calc R U . . .
C15 C 0.8446(4) 0.40834(16) 0.35506(13) 0.0193(5) Uani 1 1 d . . . . .
H15A H 0.8775 0.3549 0.3846 0.023 Uiso 1 1 calc R U . . .
H15B H 0.9798 0.4097 0.3231 0.023 Uiso 1 1 calc R U . . .
C16 C 0.8497(4) 0.49990(16) 0.39289(12) 0.0182(5) Uani 1 1 d . . . . .
C17 C 0.6672(5) 0.51907(18) 0.43889(12) 0.0210(5) Uani 1 1 d . . . . .
H17A H 0.5362 0.4751 0.4453 0.025 Uiso 1 1 calc R U . . .
C18 C 0.6753(5) 0.60126(19) 0.47516(13) 0.0229(5) Uani 1 1 d . . . . .
H18A H 0.5497 0.6132 0.5060 0.028 Uiso 1 1 calc R U . . .
C19 C 0.8654(5) 0.66609(18) 0.46679(13) 0.0243(6) Uani 1 1 d . . . . .
H19A H 0.8711 0.7221 0.4920 0.029 Uiso 1 1 calc R U . . .
C20 C 1.0470(5) 0.64867(18) 0.42143(13) 0.0232(5) Uani 1 1 d . . . . .
H20A H 1.1775 0.6929 0.4153 0.028 Uiso 1 1 calc R U . . .
C21 C 1.0382(4) 0.56600(18) 0.38467(13) 0.0208(5) Uani 1 1 d . . . . .
H21A H 1.1631 0.5547 0.3535 0.025 Uiso 1 1 calc R U . . .
 
loop_
 _atom_site_aniso_label
 _atom_site_aniso_U_11
 _atom_site_aniso_U_22
 _atom_site_aniso_U_33
 _atom_site_aniso_U_23
 _atom_site_aniso_U_13
 _atom_site_aniso_U_12
N1 0.0222(11) 0.0230(11) 0.0206(11) 0.0005(9) -0.0018(9) -0.0048(8)
C2 0.0186(11) 0.0196(11) 0.0191(11) 0.0004(9) 0.0013(9) -0.0003(9)
C3 0.0158(10) 0.0195(11) 0.0180(11) -0.0003(9) 0.0005(9) 0.0005(9)
C4 0.0217(12) 0.0197(12) 0.0200(12) -0.0021(10) -0.0013(10) 0.0009(9)
C5 0.0255(13) 0.0217(12) 0.0250(13) 0.0016(10) -0.0001(11) -0.0032(10)
C6 0.0281(13) 0.0260(13) 0.0225(13) 0.0014(11) 0.0075(11) -0.0015(11)
C7 0.0345(14) 0.0275(13) 0.0174(13) -0.0016(10) 0.0010(11) -0.0029(11)
C8 0.0318(14) 0.0238(12) 0.0208(12) -0.0026(10) -0.0025(11) -0.0044(11)
C9 0.0192(11) 0.0180(10) 0.0219(12) 0.0010(9) -0.0012(10) -0.0037(9)
C10 0.0219(12) 0.0226(12) 0.0290(14) 0.0024(11) 0.0018(11) -0.0006(10)
C11 0.0237(12) 0.0240(13) 0.0390(16) 0.0070(12) -0.0023(12) 0.0018(11)
C12 0.0276(13) 0.0316(14) 0.0310(15) 0.0129(12) -0.0037(12) -0.0033(11)
C13 0.0268(13) 0.0382(15) 0.0278(14) 0.0082(12) 0.0054(12) -0.0033(12)
C14 0.0223(12) 0.0286(13) 0.0270(13) 0.0035(11) 0.0026(11) 0.0023(10)
C15 0.0170(11) 0.0184(11) 0.0226(12) -0.0014(10) -0.0015(9) 0.0013(9)
C16 0.0188(11) 0.0179(11) 0.0178(11) 0.0009(9) -0.0035(9) 0.0017(9)
C17 0.0200(12) 0.0222(12) 0.0209(12) 0.0003(10) -0.0005(9) -0.0001(9)
C18 0.0253(12) 0.0259(12) 0.0176(12) -0.0009(10) -0.0004(10) 0.0051(10)
C19 0.0304(13) 0.0219(12) 0.0206(12) -0.0040(10) -0.0059(11) 0.0030(10)
C20 0.0242(13) 0.0222(12) 0.0231(13) 0.0006(10) -0.0040(10) -0.0041(10)
C21 0.0193(12) 0.0233(12) 0.0200(12) -0.0007(10) -0.0005(9) 0.0017(9)
 
_geom_special_details
;
 All esds (except the esd in the dihedral angle between two l.s. planes)
 are estimated using the full covariance matrix.  The cell esds are taken
 into account individually in the estimation of esds in distances, angles
 and torsion angles; correlations between esds in cell parameters are only
 used when they are defined by crystal symmetry.  An approximate (isotropic)
 treatment of cell esds is used for estimating esds involving l.s. planes.
;
 
loop_
 _geom_bond_atom_site_label_1
 _geom_bond_atom_site_label_2
 _geom_bond_distance
 _geom_bond_site_symmetry_2
 _geom_bond_publ_flag
N1 C8 1.466(3) . ?
N1 C2 1.488(3) . ?
N1 H1 0.91(4) . ?
C2 C9 1.523(3) . ?
C2 C3 1.541(3) . ?
C2 H2A 1.0000 . ?
C3 C15 1.538(3) . ?
C3 C4 1.539(3) . ?
C3 H3A 1.0000 . ?
C4 C5 1.531(4) . ?
C4 H4A 0.9900 . ?
C4 H4B 0.9900 . ?
C5 C6 1.544(4) . ?
C5 H5A 0.9900 . ?
C5 H5B 0.9900 . ?
C6 C7 1.536(4) . ?
C6 H6A 0.9900 . ?
C6 H6B 0.9900 . ?
C7 C8 1.527(4) . ?
C7 H7A 0.9900 . ?
C7 H7B 0.9900 . ?
C8 H8A 0.9900 . ?
C8 H8B 0.9900 . ?
C9 C10 1.394(4) . ?
C9 C14 1.394(4) . ?
C10 C11 1.394(4) . ?
C10 H10A 0.9500 . ?
C11 C12 1.385(4) . ?
C11 H11A 0.9500 . ?
C12 C13 1.388(4) . ?
C12 H12A 0.9500 . ?
C13 C14 1.387(4) . ?
C13 H13A 0.9500 . ?
C14 H14A 0.9500 . ?
C15 C16 1.515(3) . ?
C15 H15A 0.9900 . ?
C15 H15B 0.9900 . ?
C16 C21 1.391(3) . ?
C16 C17 1.403(3) . ?
C17 C18 1.386(4) . ?
C17 H17A 0.9500 . ?
C18 C19 1.386(4) . ?
C18 H18A 0.9500 . ?
C19 C20 1.386(4) . ?
C19 H19A 0.9500 . ?
C20 C21 1.398(4) . ?
C20 H20A 0.9500 . ?
C21 H21A 0.9500 . ?
 
loop_
 _geom_angle_atom_site_label_1
 _geom_angle_atom_site_label_2
 _geom_angle_atom_site_label_3
 _geom_angle
 _geom_angle_site_symmetry_1
 _geom_angle_site_symmetry_3
 _geom_angle_publ_flag
C8 N1 C2 114.7(2) . . ?
C8 N1 H1 107(3) . . ?
C2 N1 H1 107(3) . . ?
N1 C2 C9 110.19(19) . . ?
N1 C2 C3 110.8(2) . . ?
C9 C2 C3 111.4(2) . . ?
N1 C2 H2A 108.1 . . ?
C9 C2 H2A 108.1 . . ?
C3 C2 H2A 108.1 . . ?
C15 C3 C4 112.6(2) . . ?
C15 C3 C2 110.07(19) . . ?
C4 C3 C2 114.5(2) . . ?
C15 C3 H3A 106.3 . . ?
C4 C3 H3A 106.3 . . ?
C2 C3 H3A 106.3 . . ?
C5 C4 C3 118.7(2) . . ?
C5 C4 H4A 107.6 . . ?
C3 C4 H4A 107.6 . . ?
C5 C4 H4B 107.6 . . ?
C3 C4 H4B 107.6 . . ?
H4A C4 H4B 107.1 . . ?
C4 C5 C6 117.2(2) . . ?
C4 C5 H5A 108.0 . . ?
C6 C5 H5A 108.0 . . ?
C4 C5 H5B 108.0 . . ?
C6 C5 H5B 108.0 . . ?
H5A C5 H5B 107.2 . . ?
C7 C6 C5 115.9(2) . . ?
C7 C6 H6A 108.3 . . ?
C5 C6 H6A 108.3 . . ?
C7 C6 H6B 108.3 . . ?
C5 C6 H6B 108.3 . . ?
H6A C6 H6B 107.4 . . ?
C8 C7 C6 115.7(2) . . ?
C8 C7 H7A 108.3 . . ?
C6 C7 H7A 108.3 . . ?
C8 C7 H7B 108.3 . . ?
C6 C7 H7B 108.3 . . ?
H7A C7 H7B 107.4 . . ?
N1 C8 C7 115.2(2) . . ?
N1 C8 H8A 108.5 . . ?
C7 C8 H8A 108.5 . . ?
N1 C8 H8B 108.5 . . ?
C7 C8 H8B 108.5 . . ?
H8A C8 H8B 107.5 . . ?
C10 C9 C14 117.9(2) . . ?
C10 C9 C2 120.5(2) . . ?
C14 C9 C2 121.6(2) . . ?
C9 C10 C11 121.0(2) . . ?
C9 C10 H10A 119.5 . . ?
C11 C10 H10A 119.5 . . ?
C12 C11 C10 120.2(2) . . ?
C12 C11 H11A 119.9 . . ?
C10 C11 H11A 119.9 . . ?
C11 C12 C13 119.3(2) . . ?
C11 C12 H12A 120.3 . . ?
C13 C12 H12A 120.3 . . ?
C14 C13 C12 120.3(3) . . ?
C14 C13 H13A 119.9 . . ?
C12 C13 H13A 119.9 . . ?
C13 C14 C9 121.2(2) . . ?
C13 C14 H14A 119.4 . . ?
C9 C14 H14A 119.4 . . ?
C16 C15 C3 113.97(18) . . ?
C16 C15 H15A 108.8 . . ?
C3 C15 H15A 108.8 . . ?
C16 C15 H15B 108.8 . . ?
C3 C15 H15B 108.8 . . ?
H15A C15 H15B 107.7 . . ?
C21 C16 C17 118.0(2) . . ?
C21 C16 C15 121.4(2) . . ?
C17 C16 C15 120.6(2) . . ?
C18 C17 C16 120.9(2) . . ?
C18 C17 H17A 119.5 . . ?
C16 C17 H17A 119.5 . . ?
C19 C18 C17 120.5(2) . . ?
C19 C18 H18A 119.8 . . ?
C17 C18 H18A 119.8 . . ?
C18 C19 C20 119.5(2) . . ?
C18 C19 H19A 120.2 . . ?
C20 C19 H19A 120.2 . . ?
C19 C20 C21 120.0(2) . . ?
C19 C20 H20A 120.0 . . ?
C21 C20 H20A 120.0 . . ?
C16 C21 C20 121.1(2) . . ?
C16 C21 H21A 119.4 . . ?
C20 C21 H21A 119.4 . . ?
 
_refine_diff_density_max    0.408
_refine_diff_density_min   -0.340
_refine_diff_density_rms    0.113

_shelx_res_file
;

    weij3.res created by SHELXL-2014/7


TITL hkl_a.res in P2(1)2(1)2(1)
CELL 0.71073 5.3984 14.1143 20.8891 90.000 90.000 90.000
ZERR 4.00 0.0014 0.0043 0.0068 0.000 0.000 0.000
LATT -1
SYMM x+1/2, -y+1/2, -z
SYMM -x, y+1/2, -z+1/2
SYMM -x+1/2, -y, z+1/2
SFAC C H N
UNIT 80 100 4
TEMP -173.150
SIZE 0.042 0.089 0.318
omit -3 55

plan 20
acta 50
FMAP 2
Bond $H
L.S. 4

WGHT    0.072300
FVAR       0.23806
N1    3    0.360951    0.269879    0.257770    11.00000    0.02219    0.02303 =
         0.02065    0.00046   -0.00176   -0.00485
H1    2    0.285546    0.217580    0.273954    11.00000    0.05125
C2    1    0.586739    0.286378    0.297062    11.00000    0.01856    0.01959 =
         0.01913    0.00044    0.00128   -0.00027
AFIX  13
H2A   2    0.734891    0.274245    0.269519    11.00000   -1.20000
AFIX   0
C3    1    0.598205    0.389970    0.320239    11.00000    0.01576    0.01946 =
         0.01803   -0.00033    0.00051    0.00052
AFIX  13
H3A   2    0.464787    0.397034    0.353104    11.00000   -1.20000
AFIX   0
C4    1    0.543963    0.464108    0.268070    11.00000    0.02175    0.01973 =
         0.01997   -0.00214   -0.00134    0.00094
AFIX  23
H4A   2    0.375016    0.451874    0.251594    11.00000   -1.20000
H4B   2    0.540760    0.527104    0.288894    11.00000   -1.20000
AFIX   0
C5    1    0.718237    0.470577    0.210396    11.00000    0.02545    0.02169 =
         0.02505    0.00160   -0.00011   -0.00316
AFIX  23
H5A   2    0.888593    0.480286    0.226669    11.00000   -1.20000
H5B   2    0.672941    0.527769    0.185581    11.00000   -1.20000
AFIX   0
C6    1    0.722746    0.385516    0.163938    11.00000    0.02810    0.02598 =
         0.02245    0.00135    0.00750   -0.00147
AFIX  23
H6A   2    0.795277    0.406869    0.122870    11.00000   -1.20000
H6B   2    0.834397    0.336601    0.181861    11.00000   -1.20000
AFIX   0
C7    1    0.470944    0.339221    0.149915    11.00000    0.03452    0.02746 =
         0.01743   -0.00158    0.00097   -0.00291
AFIX  23
H7A   2    0.339703    0.387114    0.156888    11.00000   -1.20000
H7B   2    0.466465    0.321264    0.104116    11.00000   -1.20000
AFIX   0
C8    1    0.408784    0.251714    0.189794    11.00000    0.03180    0.02378 =
         0.02078   -0.00261   -0.00254   -0.00443
AFIX  23
H8A   2    0.260734    0.220943    0.171087    11.00000   -1.20000
H8B   2    0.548017    0.206346    0.186370    11.00000   -1.20000
AFIX   0
C9    1    0.594202    0.217332    0.353029    11.00000    0.01915    0.01803 =
         0.02189    0.00098   -0.00117   -0.00375
C10   1    0.779125    0.148638    0.356811    11.00000    0.02193    0.02262 =
         0.02904    0.00240    0.00175   -0.00064
AFIX  43
H10A  2    0.902001    0.145494    0.324325    11.00000   -1.20000
AFIX   0
C11   1    0.786609    0.084496    0.407494    11.00000    0.02366    0.02401 =
         0.03899    0.00700   -0.00226    0.00176
AFIX  43
H11A  2    0.915278    0.038684    0.409592    11.00000   -1.20000
AFIX   0
C12   1    0.607088    0.087326    0.454810    11.00000    0.02757    0.03161 =
         0.03100    0.01286   -0.00369   -0.00329
AFIX  43
H12A  2    0.610754    0.043183    0.489129    11.00000   -1.20000
AFIX   0
C13   1    0.421711    0.155326    0.451581    11.00000    0.02682    0.03823 =
         0.02781    0.00820    0.00540   -0.00326
AFIX  43
H13A  2    0.298195    0.157911    0.483928    11.00000   -1.20000
AFIX   0
C14   1    0.416104    0.219483    0.401339    11.00000    0.02230    0.02863 =
         0.02703    0.00347    0.00258    0.00227
AFIX  43
H14A  2    0.288503    0.265779    0.399804    11.00000   -1.20000
AFIX   0
C15   1    0.844555    0.408336    0.355064    11.00000    0.01703    0.01840 =
         0.02257   -0.00136   -0.00153    0.00132
AFIX  23
H15A  2    0.877507    0.354920    0.384576    11.00000   -1.20000
H15B  2    0.979772    0.409740    0.323062    11.00000   -1.20000
AFIX   0
C16   1    0.849694    0.499899    0.392888    11.00000    0.01883    0.01787 =
         0.01780    0.00090   -0.00349    0.00171
C17   1    0.667168    0.519075    0.438891    11.00000    0.02002    0.02215 =
         0.02089    0.00031   -0.00053   -0.00015
AFIX  43
H17A  2    0.536183    0.475130    0.445277    11.00000   -1.20000
AFIX   0
C18   1    0.675276    0.601258    0.475162    11.00000    0.02533    0.02588 =
         0.01757   -0.00093   -0.00037    0.00507
AFIX  43
H18A  2    0.549669    0.613223    0.505971    11.00000   -1.20000
AFIX   0
C19   1    0.865355    0.666095    0.466793    11.00000    0.03039    0.02191 =
         0.02062   -0.00403   -0.00589    0.00298
AFIX  43
H19A  2    0.871060    0.722094    0.491982    11.00000   -1.20000
AFIX   0
C20   1    1.047000    0.648671    0.421433    11.00000    0.02424    0.02221 =
         0.02312    0.00064   -0.00398   -0.00412
AFIX  43
H20A  2    1.177492    0.692914    0.415320    11.00000   -1.20000
AFIX   0
C21   1    1.038234    0.565999    0.384672    11.00000    0.01929    0.02330 =
         0.01996   -0.00069   -0.00049    0.00174
AFIX  43
H21A  2    1.163128    0.554749    0.353547    11.00000   -1.20000

AFIX   0
HKLF 4

REM  hkl_a.res in P2(1)2(1)2(1)
REM R1 =  0.0479 for    3168 Fo > 4sig(Fo)  and  0.0581 for all    3629 data
REM    194 parameters refined using      0 restraints

END

WGHT      0.0695      0.0000

REM Highest difference peak  0.408,  deepest hole -0.340,  1-sigma level  0.113
Q1    1   0.4448  0.6074  0.4772  11.00000  0.05    0.41
Q2    1   0.4862  0.6522  0.4689  11.00000  0.05    0.40
Q3    1   0.4750  0.3959  0.3347  11.00000  0.05    0.37
Q4    1   0.7200  0.3983  0.3416  11.00000  0.05    0.35
Q5    1   0.3408  0.3860  0.3481  11.00000  0.05    0.35
Q6    1   1.1924  0.3970  0.3482  11.00000  0.05    0.35
Q7    1   0.5719  0.3388  0.3159  11.00000  0.05    0.34
Q8    1   0.2415  0.3407  0.3209  11.00000  0.05    0.34
Q9    1   0.3614  0.6514  0.4865  11.00000  0.05    0.34
Q10   1   0.3709  0.3429  0.3397  11.00000  0.05    0.33
Q11   1   1.0197  0.1242  0.2611  11.00000  0.05    0.32
Q12   1   0.8787  0.7810  0.5012  11.00000  0.05    0.31
Q13   1   0.7108  0.6542  0.4542  11.00000  0.05    0.31
Q14   1   0.1225  0.2357  0.3511  11.00000  0.05    0.31
Q15   1   0.2390  0.2582  0.3317  11.00000  0.05    0.31
Q16   1   1.0935  0.7724  0.4947  11.00000  0.05    0.29
Q17   1   1.0877  0.1063  0.2700  11.00000  0.05    0.29
Q18   1   0.6160  0.5832  0.4399  11.00000  0.05    0.29
Q19   1   0.6569  0.7728  0.5020  11.00000  0.05    0.28
Q20   1   0.7003  0.5107  0.4009  11.00000  0.05    0.27
;
_shelx_res_checksum   20684

_shelx_hkl_file
;
  -1   0   0   -0.06    0.07
   1   0   0   -0.01    0.16
  -1   0   0   -0.13    0.16
   1   0   0   -0.14    0.14
  -1   0   0   -0.67    2.83
  -1   0   0    0.03    0.10
   1   0   0    0.00    0.15
   1   0   0   -0.59    2.84
  -1   0   0    0.10    0.17
  -1   0   0   -0.02    0.14
  -1   0   0   -0.56    0.93
  -1   0   0    0.08    0.09
  -2   0   0    2.05    0.21
  -2   0   0    1.82    0.36
  -2   0   0    1.41    0.33
   2   0   0    2.86    0.52
  -2   0   0    2.11    0.40
   2   0   0    2.08    0.40
   2   0   0    0.13    3.44
  -2   0   0    1.44    3.05
  -2   0   0    1.90    0.22
  -2   0   0    1.97    0.24
   2   0   0    1.33    0.37
   3   0   0    0.08    0.20
  -3   0   0   -3.07    2.77
  -3   0   0    0.02    0.09
   3   0   0    0.10    0.28
  -3   0   0   -0.22    0.16
  -3   0   0   -0.13    0.11
  -3   0   0    0.10    0.18
  -3   0   0   -0.01    0.18
  -3   0   0    0.62    1.19
  -3   0   0   -0.03    0.11
   3   0   0    2.39    4.30
   3   0   0   -0.39    0.18
   4   0   0   43.79    2.15
  -4   0   0   43.68    1.72
  -4   0   0   43.33    1.30
   4   0   0   42.18    2.08
  -4   0   0   43.37    1.24
   4   0   0   45.34    2.29
  -5   0   0    0.05    0.80
   5   0   0    0.02    0.35
  -5   0   0    0.15    0.16
  -5   0   0   -0.29    0.61
  -5   0   0    0.12    0.27
   5   0   0    0.09    0.43
  -5   0   0   -0.04    0.16
   5   0   0   -0.28    1.54
  -5   0   0   -0.18    0.11
   5   0   0    0.04    0.40
   6   0   0    8.04    1.32
   6   0   0    6.88    1.41
   6   0   0    6.80    1.21
   7   0   0    0.84    5.89
   7   0   0    1.52    0.72
   7   0   0    0.18    0.61
   7   0   0    1.73    0.80
   1  -1   0  293.88    4.52
  -1  -1   0  290.14    4.57
   1  -1   0  296.31    4.28
  -1   1   0  288.88    4.22
   1   1   0  291.44    4.28
   1  -1   0  287.85    4.13
  -1   1   0  287.33    4.13
   1  -1   0  291.22    4.63
  -1  -1   0  288.36    4.29
   1  -1   0  304.32   15.51
  -1   1   0  281.55   15.08
   1   1   0  291.21    4.35
   1   1   0  285.18    4.56
  -1   1   0  295.01    4.52
  -1  -1   0  295.69    4.52
  -1   1   0  295.50    4.64
  -1  -1   0  292.83    4.38
   1   1   0  303.65    4.62
   2  -1   0   84.58    2.10
  -2   1   0   89.94    2.31
  -2  -1   0   84.28    2.28
  -2  -1   0   87.65    2.28
  -2   1   0   87.06    1.73
  -2   1   0   87.72    2.09
   2  -1   0   84.87    2.36
  -2  -1   0   86.94    2.21
  -2   1   0   86.20    1.79
  -2  -1   0   86.20    1.34
   2   1   0   82.93    2.28
  -2   1   0   85.53    1.39
  -2  -1   0   85.92    1.86
   2  -1   0   88.31    2.35
   2   1   0   86.83    2.39
   2  -1   0   88.62    1.67
  -2   1   0   87.05    2.37
   2   1   0   86.45    2.21
  -3  -1   0    3.03    3.33
  -3  -1   0    0.40    0.24
  -3  -1   0    0.63    0.19
  -3  -1   0    0.61    0.24
   3  -1   0    0.19    0.24
   3   1   0    1.45    4.21
   3  -1   0    0.90    0.32
  -3   1   0    3.03    4.60
  -3   1   0    0.34    0.22
  -3  -1   0    0.33    0.10
  -3   1   0    0.36    0.11
  -3   1   0    0.63    0.25
  -3   1   0    0.24    0.17
  -3   1   0    0.39    0.33
   3  -1   0   -0.08    0.22
  -3  -1   0    0.24    0.19
   3   1   0    0.36    0.29
   3   1   0    0.21    0.27
  -3  -1   0    0.23    0.27
   3  -1   0    2.38    4.22
  -3   1   0    0.45    0.19
   3   1   0    0.58    0.34
  -4   1   0    0.86    0.84
  -4   1   0    1.03    0.94
  -4  -1   0    1.09    0.26
  -4  -1   0    0.70    0.14
   4   1   0   -0.25    1.36
  -4  -1   0    2.50    1.30
   4   1   0    0.63    0.40
   4  -1   0   -0.19    1.47
   4   1   0    1.38    0.59
  -4  -1   0    0.83    0.26
   4  -1   0    0.67    0.39
  -4   1   0    0.74    0.16
   4  -1   0    0.97    0.43
  -4   1   0    1.12    0.27
  -4   1   0    1.07    0.18
  -4  -1   0    0.56    0.13
   4   1   0    0.93    0.49
   4  -1   0    0.59    0.42
   5  -1   0   15.88    1.38
  -5  -1   0   14.30    0.76
   5  -1   0   17.10    1.56
   5   1   0   15.98    1.45
  -5  -1   0   16.15    0.85
   5   1   0   14.91    1.40
   5  -1   0   14.99    1.47
  -5  -1   0   16.20    0.91
  -5   1   0   14.40    0.81
   5   1   0   15.61    1.52
   6   1   0    5.71    1.31
   6   1   0    6.44    1.30
   6  -1   0    1.08    3.17
  -6  -1   0    6.04    0.56
   6  -1   0    7.23    1.32
   6  -1   0    6.62    1.39
   6  -1   0    9.14    1.44
  -6   1   0    7.09    0.52
   7   1   0    0.87    0.97
   7   1   0   -0.11    0.62
   7  -1   0    1.43    0.77
   7  -1   0    0.68    0.70
   7  -1   0    0.20    0.65
   7   1   0   -1.02    3.73
   7   1   0   -0.62    0.55
   0   2   0    8.11    1.59
   0   2   0    8.44    1.77
   0  -2   0    8.15    1.76
   1   2   0   92.27    2.06
  -1   2   0   97.89   10.01
  -1   2   0   92.13    1.56
  -1  -2   0   93.60    1.84
  -1  -2   0   93.54    1.94
   1  -2   0   91.32    1.79
   1   2   0   91.34    1.63
  -1   2   0   91.61    1.40
   1  -2   0   92.04    2.09
   1   2   0   88.18    1.89
   1   2   0   92.42    2.00
  -1  -2   0   91.32    1.93
  -1   2   0   92.50    1.97
  -1   2   0   89.72    1.84
  -1   2   0   91.47    2.05
   1  -2   0   93.27    1.41
   1  -2   0   91.94    1.60
  -1   2   0   89.99    1.77
  -1  -2   0   91.96    1.66
  -1  -2   0   91.74    2.05
   2   2   0   46.38    1.69
  -2  -2   0   45.70    1.40
   2  -2   0   44.38    1.21
  -2   2   0   43.78    1.66
  -2  -2   0   45.67    1.67
   2   2   0   46.97    1.47
  -2   2   0   49.99    1.39
  -2   2   0   46.11    1.24
   2  -2   0   45.29    1.72
  -2  -2   0   47.05    1.60
  -2   2   0   45.81    1.59
   2  -2   0   45.63    1.62
  -2   2   0   47.46    1.34
  -2  -2   0   46.23    1.46
   2   2   0   45.88    1.67
   2   2   0   45.42    1.38
   2  -2   0   47.64    1.62
  -3   2   0   10.75    0.70
   3  -2   0   12.77    1.03
  -3   2   0   12.87    0.67
  -3   2   0   11.69    0.82
   3  -2   0   11.15    1.01
   3   2   0   11.82    0.90
   3  -2   0   13.39    0.64
   3  -2   0   12.67    0.89
  -3  -2   0   12.12    0.66
  -3  -2   0   13.16    0.79
   3   2   0   13.58    1.10
   3   2   0   11.42    0.99
  -3  -2   0   12.41    0.91
  -3   2   0   12.98    0.99
  -4  -2   0    9.92    2.15
  -4  -2   0   14.73    0.83
   4  -2   0   14.10    1.30
   4   2   0   13.99    1.22
  -4   2   0   14.36    0.91
  -4   2   0   12.38    1.79
  -4   2   0   15.58    0.89
   4  -2   0   15.17    1.15
   4   2   0   13.31    1.14
  -4  -2   0   14.63    0.80
  -4   2   0   11.69    1.59
  -4  -2   0   14.52    0.92
  -4  -2   0   14.69    4.88
   4  -2   0   12.02    1.21
   4   2   0   16.95    1.42
  -5  -2   0    5.16    1.08
   5   2   0    7.72    1.24
   5   2   0    9.44    1.09
  -5   2   0    7.54    0.68
  -5  -2   0    8.34    0.68
  -5  -2   0    4.34    1.70
   5  -2   0    9.35    1.05
  -5  -2   0    7.80    0.64
  -5  -2   0    7.72    0.74
   5  -2   0    8.92    1.35
   5  -2   0    7.65    1.26
   5   2   0    8.29    1.29
   6  -2   0   19.98    1.65
   6  -2   0   16.11    2.35
  -6  -2   0   18.85    0.90
  -6   2   0   21.49    1.06
   6   2   0   19.51    1.81
   6   2   0   19.83    1.99
   6   2   0   20.30    1.74
  -6  -2   0   20.95    1.18
   6  -2   0   21.81    1.98
   7  -2   0    5.43    1.37
   7   2   0    6.56    1.27
   7  -2   0    6.59    1.50
   7  -2   0    7.80    1.42
   7   2   0    6.52    1.25
   7   2   0    6.15    1.50
   7   2   0    2.82    3.35
   0  -3   0    0.54    1.29
   0  -3   0    0.03    0.12
   0   3   0    0.62    1.28
   0   3   0    0.04    0.15
   0  -3   0    0.09    0.20
   0  -3   0   -0.08    0.13
   0   3   0   -0.04    0.16
   0   3   0    0.23    0.86
   0  -3   0    0.28    0.70
   0   3   0   -0.11    0.10
   1   3   0   31.55    1.12
  -1  -3   0   34.64    1.09
  -1  -3   0   32.77    0.73
   1   3   0   31.18    1.17
  -1  -3   0   30.32    1.15
   1  -3   0   31.80    0.81
  -1  -3   0   30.78    1.08
   1   3   0   31.40    1.10
  -1   3   0   29.98    1.02
  -1   3   0   32.86    1.16
  -1   3   0   22.00    7.48
  -1  -3   0   31.83    1.13
   1  -3   0   33.47    1.08
   1  -3   0   31.93    0.74
  -1   3   0   31.76    0.91
  -1   3   0   32.05    1.09
   1  -3   0   30.95    1.16
  -2  -3   0    2.95    2.21
  -2   3   0    0.74    3.72
  -2   3   0    1.01    0.54
  -2  -3   0    1.38    0.29
  -2  -3   0    0.92    0.30
  -2  -3   0    1.42    0.42
  -2  -3   0    1.38    0.40
  -2   3   0    0.88    0.30
   2  -3   0    1.20    0.28
  -2   3   0    1.43    0.43
   2  -3   0    0.88    0.37
   2  -3   0    0.95    0.24
  -2  -3   0    5.02    2.37
  -2   3   0    1.02    0.24
  -2   3   0    1.17    0.31
   2  -3   0    1.49    1.26
  -2   3   0    1.86    1.44
  -2   3   0    1.49    0.30
   2   3   0    2.14    0.48
   2   3   0    0.91    2.74
  -2  -3   0    1.65    0.32
  -2  -3   0    1.50    1.12
   2  -3   0    1.84    3.78
   2   3   0    1.29    1.94
   2   3   0    1.05    0.29
   2   3   0    1.35    0.39
   3   3   0    7.08    0.83
  -3  -3   0    6.02    0.53
  -3  -3   0    6.28    0.64
   3   3   0    7.02    0.68
  -3  -3   0    6.85    0.63
  -3   3   0    6.63    0.71
   3  -3   0    5.27    0.80
  -3   3   0    6.78    0.62
   3   3   0    7.92    0.87
   3  -3   0    7.31    0.84
   3  -3   0    6.36    0.51
   3  -3   0   -0.30    3.47
  -3   3   0    6.80    0.58
   3  -3   0    6.43    0.62
  -3   3   0    6.99    0.53
  -4  -3   0   11.72    2.34
   4   3   0    7.03    1.12
  -4  -3   0    7.70    0.65
   4   3   0    6.41    1.02
  -4   3   0    7.44    0.56
   4  -3   0    7.72    0.79
   4  -3   0    5.91    1.02
   4  -3   0    6.11    1.05
   4   3   0    7.27    0.85
  -4   3   0    7.44    0.71
   4  -3   0    7.37    0.52
  -4   3   0    6.61    0.77
  -4  -3   0    7.29    0.71
  -4  -3   0   10.42    2.74
  -4  -3   0    7.67    0.63
   5   3   0   -0.20    0.41
  -5  -3   0    0.56    0.28
   5   3   0    1.45    2.05
  -5   3   0    0.15    0.26
  -5  -3   0    0.69    0.28
  -5  -3   0    0.56    0.32
  -5   3   0    0.13    0.38
  -5  -3   0   -0.02    0.65
   5  -3   0    0.81    0.35
  -5  -3   0   -0.47    1.15
   5  -3   0    0.88    0.56
  -5   3   0    0.25    0.20
   5   3   0    0.47    0.45
   5   3   0    0.01    0.42
   5  -3   0   -1.31    1.66
   5  -3   0    0.71    0.43
  -6   3   0    4.85    0.71
   6  -3   0    5.37    1.05
   6   3   0    4.28    0.97
   6  -3   0    0.45    2.56
  -6  -3   0    6.55    0.79
  -6  -3   0    5.70    0.60
   6  -3   0    9.06    1.58
   6   3   0    5.28    1.30
   6   3   0    6.01    1.12
   7   3   0    7.66    1.54
   7   3   0    6.90    1.32
   7   3   0    5.17    1.32
   7   3   0   -0.65    4.16
   7  -3   0    6.39    1.12
   0   4   0    2.13    0.28
   0   4   0    2.04    1.75
   0  -4   0    2.96    1.91
   0   4   0    1.71    0.34
   0  -4   0    2.10    1.34
   0  -4   0    2.14    0.30
   0   4   0    4.85    1.86
   0  -4   0    1.95    0.37
   0  -4   0    2.05    0.25
   0   4   0    1.81    0.33
   0  -4   0    2.21    0.40
   1   4   0    8.86    3.52
  -1  -4   0    1.89    0.34
  -1  -4   0    1.91    0.38
  -1   4   0    2.21    0.38
   1   4   0    2.28    0.41
  -1  -4   0    1.87    0.39
   1  -4   0    2.32    0.31
  -1   4   0    1.70    0.34
  -1  -4   0    8.75    3.13
   1   4   0    1.82    0.36
   1  -4   0    2.49    0.41
   1  -4   0    2.22    0.42
   1   4   0    1.80    0.38
  -1   4   0    2.10    0.39
   1  -4   0    4.53    1.22
  -1   4   0    2.09    0.26
   1   4   0    1.65    0.34
  -1  -4   0    2.19    0.14
  -1   4   0    0.41    3.24
  -1   4   0    4.11    2.06
   2   4   0    2.84    0.24
  -2  -4   0    3.64    0.60
  -2  -4   0    2.60    0.52
  -2   4   0    3.58    0.63
   2   4   0    9.60    4.91
   2  -4   0    3.63    0.68
   2   4   0    3.61    0.25
   2   4   0    3.08    0.51
  -2   4   0    3.44    0.53
  -2   4   0    4.30    1.31
   2  -4   0    3.49    0.50
   2  -4   0    3.50    0.22
  -2   4   0    8.34    5.57
  -2   4   0    3.67    0.50
  -2  -4   0    3.14    0.52
   2  -4   0    3.15    0.34
  -2  -4   0    3.41    0.48
  -2   4   0    3.43    0.53
   2  -4   0   -1.22    3.70
   2   4   0    3.12    0.55
   2   4   0    2.98    0.33
  -2  -4   0    3.02    0.36
   2   4   0    3.13    0.59
  -2  -4   0   11.44    3.75
   3  -4   0   27.97    1.21
  -3  -4   0   27.87    1.27
  -3  -4   0   25.26    1.32
   3   4   0   25.90    1.55
  -3   4   0   25.59    1.11
   3  -4   0   25.39    1.58
  -3   4   0   24.47    1.39
  -3   4   0   25.95    1.27
  -3   4   0   26.56    1.08
  -3  -4   0   26.30    1.21
   3   4   0   24.82    1.18
   3  -4   0   26.78    1.14
   3   4   0   27.14    1.59
  -4  -4   0   18.31    1.05
   4  -4   0   19.23    1.22
  -4  -4   0   14.78    3.52
  -4   4   0   19.92    0.97
   4   4   0   22.37    4.71
  -4   4   0   19.33    1.10
  -4  -4   0   17.66    2.87
   4  -4   0   18.18    0.93
   4   4   0   20.40    1.29
   4  -4   0   21.41    1.67
   4   4   0   19.26    1.60
   4   4   0   18.48    1.50
  -4   4   0   20.27    1.22
  -4  -4   0   19.58    1.25
   5   4   0    1.26    1.95
   5  -4   0    0.73    2.55
  -5   4   0   -0.30    0.29
   5  -4   0    0.00    0.29
   5   4   0    0.11    0.34
  -5  -4   0    0.06    0.26
  -5  -4   0   -0.54    0.71
   5  -4   0    0.24    0.39
  -5  -4   0    1.12    1.46
   5   4   0    0.04    0.46
   5   4   0    0.43    0.33
  -5   4   0   -0.10    0.16
  -5  -4   0    0.18    0.28
  -6  -4   0    0.95    1.49
   6   4   0   -0.33    0.41
   6   4   0   -0.45    2.03
  -6  -4   0   -0.33    0.28
   6   4   0    0.85    0.55
  -6  -4   0    0.43    0.75
  -6   4   0   -0.08    0.30
  -6  -4   0   -0.15    0.34
   6  -4   0    0.71    0.48
   6   4   0    0.79    0.63
   6  -4   0    0.40    0.47
   7  -4   0   13.65    2.10
   0  -5   0   -0.05    0.10
   0  -5   0   -0.14    0.59
   0   5   0   -0.34    0.72
   0  -5   0    0.09    0.20
   0   5   0   -0.07    0.16
   0   5   0    1.27    1.76
   0   5   0    0.00    0.15
   0   5   0   -0.06    0.16
   0  -5   0    0.22    1.63
   0  -5   0   -0.04    0.12
   0   5   0   -0.02    0.09
   0  -5   0    0.33    0.21
   1   5   0   15.14    0.90
   1   5   0   14.27    0.87
  -1   5   0   15.25    0.86
  -1  -5   0   14.94    0.90
   1  -5   0   15.22    0.88
   1   5   0   14.57    0.91
   1  -5   0   14.27    0.87
   1  -5   0   15.48    0.75
   1   5   0   14.66    0.83
   1   5   0   14.92    0.71
  -1   5   0   14.87    0.87
  -1  -5   0   16.01    0.95
  -1  -5   0   15.37    0.92
  -1   5   0   13.79    0.70
   1  -5   0   14.45    2.04
  -1   5   0   14.89    0.89
  -2   5   0    3.54    3.64
   2   5   0    3.33    0.54
   2  -5   0    3.71    0.55
   2   5   0    3.36    0.30
   2  -5   0    2.94    0.59
  -2   5   0    3.54    0.53
  -2  -5   0    3.03    0.32
   2   5   0    2.81    0.54
  -2  -5   0   11.75    4.13
  -2   5   0    5.37    1.81
  -2  -5   0    3.49    0.65
  -2  -5   0    2.84    0.49
   2  -5   0    3.66    0.35
  -2   5   0    7.61    2.70
  -2   5   0    3.06    0.53
  -2  -5   0    2.63    0.56
  -2  -5   0    9.05    2.87
   2  -5   0    3.19    0.29
  -2  -5   0    3.84    0.57
   2   5   0   16.54    6.89
   2   5   0    2.99    0.56
  -2   5   0    3.73    0.59
  -2   5   0    3.35    0.60
   3   5   0    3.75    0.76
  -3   5   0    3.49    0.54
   3   5   0    8.17    4.08
   3  -5   0    4.43    0.88
  -3   5   0    2.71    1.18
   3  -5   0    2.63    5.56
   3  -5   0    4.44    0.49
  -3  -5   0    4.52    0.54
  -3   5   0    3.12    0.35
  -3  -5   0    3.15    2.80
  -3  -5   0    4.24    0.71
   3   5   0    3.75    0.44
  -3  -5   0    2.99    1.96
   3   5   0    0.39    3.34
   3  -5   0    4.55    0.62
  -3   5   0    5.58    0.80
  -3   5   0    4.70    0.72
   3   5   0    3.97    0.77
  -3  -5   0    3.84    0.45
  -3   5   0    1.56    1.78
   4   5   0   12.38    1.28
  -4   5   0   11.35    0.77
   4   5   0   13.03    1.31
   4  -5   0   12.50    1.34
   4   5   0   11.50    0.92
  -4  -5   0   10.63    1.14
   4   5   0    5.40    2.99
  -4   5   0   11.01    0.77
  -4  -5   0   10.60    0.93
  -4   5   0   12.03    0.99
   4  -5   0   10.73    0.90
   4  -5   0   12.87    0.85
  -4  -5   0   10.32    0.85
  -4  -5   0   12.89    2.23
  -5   5   0    2.45    0.47
   5  -5   0    2.35    0.39
  -5  -5   0    1.51    0.40
   5   5   0    2.21    0.78
   5   5   0    2.35    0.57
   5   5   0    1.66    0.66
  -5   5   0    3.14    0.67
   5  -5   0    3.12    0.89
   5  -5   0    2.83    0.72
   5   5   0    0.25    1.75
  -5  -5   0    2.42    1.36
  -5  -5   0    2.28    1.64
  -5  -5   0    2.24    0.60
   6   5   0   12.11    1.29
   6  -5   0   14.59    1.37
   6   5   0    8.90    1.55
   6   5   0   13.24    1.57
  -6   5   0   11.25    1.13
  -6  -5   0   12.94    1.21
   6  -5   0   12.85    1.57
  -6  -5   0   12.50    1.01
   7   5   0   -1.71    4.26
   7  -5   0    0.63    0.62
   7   5   0    1.15    0.74
   7  -5   0    0.49    0.67
   0   6   0   16.45    0.65
   0   6   0   16.34    1.01
   0  -6   0   17.17    0.71
   0  -6   0   15.38    0.92
   0  -6   0   17.69    1.21
   0  -6   0   16.35    0.80
   0   6   0   16.18    0.93
   1   6   0    2.29    0.48
  -1   6   0    1.21    0.30
  -1  -6   0    1.21    0.35
   1  -6   0    1.39    0.38
   1   6   0    1.77    0.43
  -1   6   0    6.66    3.28
  -1  -6   0    1.87    0.49
   1  -6   0    1.90    0.37
  -1   6   0    1.93    0.40
  -1   6   0    1.11    0.33
   1  -6   0    1.36    0.38
  -1   6   0   -3.07    3.78
  -1  -6   0    1.73    0.43
  -1   6   0    2.42    0.50
   1   6   0    1.94    0.37
   1   6   0    1.90    0.41
  -1  -6   0    7.19    2.53
  -2   6   0   -0.15    1.38
   2   6   0    1.29    1.49
   2  -6   0    2.55    0.48
   2  -6   0    2.33    0.53
   2  -6   0    1.74    2.12
   2   6   0    2.93    0.59
   2   6   0    2.18    0.33
  -2   6   0    2.66    0.55
   2   6   0    3.20    2.94
   2  -6   0    2.39    0.27
   2   6   0    2.71    0.56
   2  -6   0    2.58    0.32
  -2  -6   0    0.75    1.41
  -2   6   0    2.94    0.52
  -2   6   0    2.15    0.51
   2   6   0    6.20    3.15
  -2  -6   0    1.39    2.05
  -2  -6   0    2.58    0.57
  -2  -6   0    2.34    0.47
  -2   6   0    0.75    0.98
   3   6   0    0.82    0.43
   3   6   0    0.39    0.38
  -3  -6   0    0.52    0.30
  -3  -6   0    0.35    0.86
  -3  -6   0    1.62    1.32
  -3   6   0    0.28    0.26
   3  -6   0    0.80    1.08
  -3  -6   0    0.33    0.25
   3  -6   0    0.33    0.25
   3   6   0    0.23    0.12
  -3   6   0    0.45    0.35
   3  -6   0    0.24    0.20
  -3  -6   0    0.11    0.17
   3   6   0    0.30    0.10
   3  -6   0    0.58    0.34
  -3   6   0    0.85    1.12
  -3   6   0   -0.06    0.60
   3   6   0   -0.26    0.90
   4  -6   0    7.47    1.20
  -4  -6   0    5.68    0.66
   4   6   0    6.14    1.08
   4  -6   0    7.31    0.71
   4   6   0    6.75    1.15
  -4  -6   0    4.26    2.38
  -4  -6   0    4.52    1.81
  -4   6   0    6.39    0.67
  -4  -6   0    7.69    0.90
  -4   6   0    6.93    0.95
   4  -6   0    7.84    0.72
   5   6   0    1.36    0.70
  -5  -6   0    1.23    0.48
   5  -6   0    2.21    0.51
   5   6   0    1.25    1.19
  -5   6   0   -0.83    1.08
  -5  -6   0    0.40    0.87
   5   6   0   -0.33    1.89
  -5  -6   0    1.15    1.87
   5  -6   0    1.79    0.72
  -5   6   0    1.78    0.40
  -5   6   0    1.06    0.40
   5  -6   0    0.89    0.41
  -6  -6   0    2.33    2.13
   6   6   0    4.38    1.07
   6   6   0    2.10    0.99
  -6  -6   0    1.19    1.12
   6  -6   0    2.11    0.69
  -6  -6   0    2.99    0.77
   6  -6   0    3.05    0.88
  -6   6   0    3.68    0.82
   6   6   0    0.82    2.62
   7   6   0    1.52    0.94
   7  -6   0    2.06    0.87
   0   7   0    0.41    0.26
   0  -7   0    0.18    0.14
   0   7   0   -0.11    0.17
   0  -7   0    0.89    2.00
   0  -7   0   -0.16    0.15
   0   7   0   -0.13    0.14
   0  -7   0    0.31    0.83
   0   7   0    0.62    1.04
   0  -7   0    0.16    0.21
   0  -7   0   -0.13    0.15
   0   7   0   -0.23    1.78
  -1  -7   0   39.06    1.73
  -1  -7   0   41.66    1.76
  -1   7   0   38.26    1.49
  -1   7   0   38.11    1.68
   1   7   0   42.34    1.80
  -1   7   0   27.89    5.07
   1  -7   0   38.76    3.95
  -1   7   0   38.39    1.65
   1  -7   0   41.99    1.60
  -1  -7   0   53.88    5.93
   1  -7   0   38.64    1.47
  -1   7   0   38.15    1.45
  -1  -7   0   57.75    7.84
  -1  -7   0   40.50    1.66
   1   7   0   36.71    1.64
   1   7   0   40.02    1.46
   1   7   0   39.27    1.56
   1  -7   0   40.07    1.73
   2  -7   0   16.41    5.63
  -2  -7   0    7.46    0.83
  -2   7   0    6.81    0.73
   2   7   0   10.95    3.51
   2  -7   0    7.47    0.44
  -2  -7   0    7.31    2.66
   2  -7   0    7.17    0.76
  -2  -7   0   11.14    4.78
   2   7   0    7.27    0.83
   2   7   0    8.13    0.84
  -2   7   0    8.42    0.80
   2   7   0    7.13    0.54
  -2   7   0    3.57    2.37
   2  -7   0    8.49    0.88
   2  -7   0    6.81    0.54
   3   7   0    3.45    0.30
   3  -7   0    2.08    0.50
   3   7   0    4.61    1.28
   3  -7   0    3.17    1.82
  -3  -7   0    3.65    0.79
  -3  -7   0    2.60    0.38
  -3  -7   0    3.33    2.01
   3   7   0    1.28    1.39
   3   7   0    2.89    0.31
   3  -7   0    2.41    0.67
   3   7   0    3.82    0.77
   3   7   0    3.11    0.70
  -3   7   0    2.60    0.52
  -3   7   0    2.56    0.56
  -3  -7   0    3.24    1.60
   3  -7   0    3.29    0.39
   3  -7   0    2.98    0.27
   4   7   0    4.60    0.96
  -4  -7   0    1.51    1.45
  -4  -7   0    5.27    0.58
   4  -7   0    4.83    0.57
  -4   7   0    4.60    0.72
  -4  -7   0    3.98    0.84
   4  -7   0    5.33    1.08
   4   7   0    4.87    1.01
  -4   7   0    4.18    0.78
  -4   7   0    1.88    1.44
   4  -7   0    5.27    0.74
  -4  -7   0    2.54    1.95
   5  -7   0    8.90    0.88
   5   7   0    8.08    1.48
   5  -7   0    7.52    0.74
  -5   7   0    8.18    0.78
   5   7   0    8.30    1.36
  -5  -7   0    8.24    1.06
  -5   7   0    7.08    1.08
   5  -7   0    8.95    1.44
  -6  -7   0   -0.24    1.97
  -6   7   0   -0.60    0.42
   6   7   0   -0.78    2.76
   6  -7   0   -0.19    0.46
  -6  -7   0    0.39    0.89
  -6  -7   0    0.02    0.38
   6   7   0   -0.03    0.62
   6  -7   0    0.31    0.45
  -6  -7   0   -0.33    0.40
  -7  -7   0   -0.94    0.54
   7   7   0    0.71    0.71
   0  -8   0   44.11    1.52
   0   8   0   45.99    1.80
   0  -8   0   41.34    1.54
   0   8   0   48.07    2.03
   0   8   0   41.26    1.76
   0  -8   0   43.12    1.80
   0  -8   0   61.85    8.45
   0  -8   0   53.97    5.64
  -1   8   0   42.16    1.88
  -1   8   0   45.15    1.91
   1   8   0   46.01    2.02
   1  -8   0   38.12    4.24
   1  -8   0   45.54    1.75
   1  -8   0   45.81    1.75
   1   8   0   45.85    1.78
   1   8   0   44.91    1.68
  -1  -8   0   46.37    1.89
  -1  -8   0   52.73    6.13
  -1   8   0   63.52    8.20
  -1   8   0   44.34    1.64
  -1  -8   0   57.41    8.31
  -1   8   0   43.29    1.67
  -1  -8   0   43.42    1.95
   2  -8   0    9.16    2.97
  -2   8   0   11.35    1.01
   2   8   0   12.40    0.77
   2  -8   0   13.76    0.84
   2   8   0   10.73    3.15
  -2  -8   0   10.16    3.52
   2   8   0   11.97    1.07
  -2   8   0   12.77    1.05
   2  -8   0   12.63    0.58
   2  -8   0   10.23    0.97
   2   8   0   14.24    1.98
  -2  -8   0   12.22    1.08
  -3  -8   0    2.62    0.67
   3   8   0    2.81    1.64
   3  -8   0    1.92    0.60
   3  -8   0    1.78    0.33
  -3   8   0    1.85    0.47
   3   8   0    1.14    0.50
   3   8   0    0.27    0.89
   3   8   0    1.80    0.30
  -3   8   0   -0.14    1.05
   3   8   0    1.92    0.58
  -3  -8   0    2.44    1.80
   3   8   0    1.52    0.28
  -3   8   0    1.50    0.53
   3   8   0    0.97    0.91
  -3  -8   0    0.66    0.82
   3  -8   0    0.25    1.57
  -4   8   0    4.90    0.93
   4  -8   0    3.21    0.84
  -4  -8   0    5.31    0.53
   4   8   0    5.21    1.06
   4   8   0    5.06    1.03
  -4   8   0    4.81    0.77
  -4  -8   0    4.24    0.91
  -4  -8   0    1.64    1.52
   4  -8   0    5.03    0.53
  -4  -8   0    1.85    1.83
   5   8   0    1.38    0.70
  -5   8   0    0.49    0.37
  -5  -8   0    2.01    2.21
   5   8   0    0.40    2.01
   5  -8   0    1.50    0.49
  -5   8   0    0.89    1.98
  -5  -8   0    1.67    0.52
  -5   8   0    0.68    0.48
   5  -8   0    0.79    0.62
  -6  -8   0   -0.28    2.25
   6  -8   0    0.18    0.52
  -6  -8   0    0.38    0.39
   6   8   0   -0.96    0.45
  -6  -8   0    0.87    0.98
   6   8   0    2.22    3.55
  -7  -8   0   -0.31    0.61
   0  -9   0   -0.01    0.23
   0   9   0    0.13    0.22
   0   9   0    0.28    0.38
   0  -9   0    0.65    1.04
   0  -9   0   -0.14    0.11
   0  -9   0    0.12    2.13
   0  -9   0    0.00    0.13
  -1   9   0   32.59    1.70
  -1  -9   0   33.87    1.79
   1  -9   0   34.68    1.22
  -1   9   0   32.93    1.51
  -1   9   0   32.30    1.42
   1   9   0   32.03    1.54
   1   9   0   33.62    1.82
   1  -9   0   32.80    1.50
   1  -9   0   33.32    1.57
  -1  -9   0   27.38    7.45
   1  -9   0   23.82    3.60
   1   9   0   33.06    1.52
  -1   9   0   33.95    1.77
   1  -9   0   32.11    7.06
  -1  -9   0   25.56    5.08
  -2  -9   0   13.25    1.19
   2  -9   0   12.13    1.11
   2  -9   0   12.48    0.85
  -2   9   0   12.44    1.11
   2   9   0   13.41    1.15
   2  -9   0   14.35    0.93
   2   9   0   12.37    0.86
  -2   9   0   14.36    1.13
  -3  -9   0    1.81    1.59
   3   9   0    2.53    1.43
   3   9   0    0.28    0.26
   3  -9   0   -0.10    0.27
  -3  -9   0    0.37    0.37
  -3   9   0    0.45    0.39
   3   9   0    2.20    1.66
   3  -9   0    0.28    0.19
   3   9   0    0.26    0.14
   3  -9   0    3.55    2.02
   3   9   0    0.09    0.40
  -3  -9   0    3.31    2.62
   3   9   0    0.89    1.25
   4  -9   0    8.33    0.64
  -4   9   0    8.49    0.94
   4   9   0    9.39    1.42
  -4   9   0    8.89    1.06
  -4  -9   0    9.24    1.16
  -4  -9   0    5.10    2.83
   4  -9   0    8.69    1.35
   5  -9   0    2.66    0.52
   5   9   0    1.57    1.87
  -5  -9   0    1.12    2.36
  -5   9   0    3.63    0.74
  -5  -9   0    2.84    1.18
   5  -9   0    3.17    0.92
  -5   9   0    3.29    0.80
   5   9   0    3.20    0.93
  -6  -9   0    2.88    0.85
  -6  -9   0    3.21    2.75
  -6   9   0    5.35    1.10
  -6  -9   0    3.63    0.88
  -7   9   0    2.28    0.86
  -7  -9   0    2.68    0.86
   0 -10   0    3.20    1.56
   0 -10   0    8.12    3.55
   1 -10   0   -0.05    1.64
  -1  10   0    0.04    0.18
   1 -10   0    0.22    0.33
   1 -10   0   -0.12    0.16
  -1  10   0   -0.03    0.21
  -1 -10   0    0.01    1.26
   1  10   0   -0.09    0.24
   1 -10   0    0.04    0.57
  -1 -10   0    0.54    0.38
  -1  10   0   -0.10    0.25
   1  10   0   -0.04    0.22
   1  10   0   -0.29    0.23
   1 -10   0   -0.03    0.15
  -1 -10   0    0.31    0.80
  -2 -10   0   22.46    1.65
   2  10   0   22.37    1.55
  -2 -10   0   20.71    4.55
   2 -10   0   21.43    1.52
  -2  10   0   21.65    1.52
  -2 -10   0   21.33    3.74
   2 -10   0   21.09    0.85
  -2  10   0   19.76    1.44
   2  10   0   22.96    1.27
   2 -10   0   30.76    5.93
   2 -10   0   22.76    1.28
   3  10   0    2.30    0.75
  -3  10   0    3.36    0.81
  -3  10   0    2.89    0.73
  -3 -10   0    1.34    2.16
   3 -10   0    2.90    0.37
   3  10   0    4.12    0.58
   3 -10   0    2.30    3.62
   3  10   0    3.55    1.69
   3 -10   0    3.01    0.50
  -3 -10   0    2.78    1.82
   3 -10   0    2.68    0.78
  -3 -10   0    3.19    0.78
  -4 -10   0   12.08    3.54
  -4  10   0   15.26    1.46
  -4  10   0   13.49    1.25
   4  10   0   14.67    0.59
   4 -10   0   15.97    1.61
  -4 -10   0   16.54    1.61
   4  10   0   12.48    1.45
  -4 -10   0    7.11    3.64
   4  10   0   14.21    0.58
  -5  10   0    0.90    0.47
  -5 -10   0    1.62    1.59
  -5  10   0    0.89    0.58
   5  10   0    2.35    2.29
   5  10   0    1.17    0.79
   5 -10   0    0.62    0.32
  -5 -10   0    1.02    0.57
   5 -10   0    0.72    0.61
  -5 -10   0   -0.54    2.07
  -6 -10   0   -1.83    2.44
  -6 -10   0    0.86    0.64
   6 -10   0    2.45    1.00
  -6 -10   0    1.29    1.58
   6  10   0    0.87    0.78
  -6  10   0    2.77    0.87
  -7  10   0    0.53    0.67
   0 -11   0    2.25    1.99
   0 -11   0   -0.14    0.16
   0  11   0    0.15    0.19
   0 -11   0    0.08    0.70
   0 -11   0    0.31    0.29
   0  11   0   -0.05    0.34
   0 -11   0   -0.01    0.16
   1  11   0   10.05    0.94
  -1  11   0   11.50    1.18
   1 -11   0   10.18    0.98
  -1  11   0   12.46    1.17
  -1 -11   0   14.95    4.85
  -1 -11   0   11.71    3.20
   1 -11   0   12.38    0.96
  -1 -11   0   11.33    1.24
   1 -11   0   10.31    0.76
   1  11   0   11.18    1.02
   1 -11   0    8.41    2.34
   1 -11   0   19.40    5.73
   1  11   0   10.83    1.14
   2  11   0   22.20    1.59
   2 -11   0   22.89    0.95
   2  11   0   23.40    1.35
   2 -11   0   23.42    5.23
  -2 -11   0   22.57    1.74
   2 -11   0   23.18    1.59
  -2  11   0   22.78    1.66
   2 -11   0   21.44    0.84
  -2  11   0   25.04    1.71
   2 -11   0   24.97    1.43
  -3  11   0    0.50    0.41
   3  11   0    4.00    2.24
  -3  11   0    0.37    0.45
  -3 -11   0    1.17    0.60
  -3 -11   0    1.87    1.41
   3 -11   0    1.00    0.23
   3  11   0    2.31    1.44
   3  11   0    1.23    0.40
   3 -11   0    7.44    3.71
   3  11   0    0.51    0.48
   3 -11   0    1.62    0.55
   3  11   0    0.58    0.32
   3 -11   0    0.93    0.38
  -3 -11   0    0.79    1.77
   4 -11   0   25.16    0.78
   4  11   0   24.87    1.01
  -4  11   0   25.24    1.90
   4  11   0   25.39    0.97
  -4  11   0   23.36    1.67
   4 -11   0   29.67    2.21
   4  11   0   23.62    2.04
  -4 -11   0   27.97    2.14
   5  11   0   18.52    1.98
   5 -11   0   20.69    2.06
  -5 -11   0   20.67    1.92
  -5  11   0   19.84    1.83
  -5  11   0   17.10    1.42
  -6  11   0   13.29    1.53
  -6 -11   0   12.76    1.60
   6 -11   0   10.93    1.88
   6  11   0    9.08    1.82
  -7 -11   0    0.08    0.83
  -7  11   0    0.32    0.68
   0 -12   0   12.83    1.27
   0  12   0   13.05    1.32
   0 -12   0   12.58    0.75
   0 -12   0    8.14    2.54
   0 -12   0   12.26    4.74
   0  12   0   14.40    1.27
  -1 -12   0    5.85    1.09
   1 -12   0    2.74    2.66
  -1 -12   0    2.87    2.66
  -1  12   0    9.15    1.11
   1  12   0    7.66    1.24
  -1  12   0    7.54    1.13
   1 -12   0    7.90    0.94
   1  12   0    5.36    0.88
   1 -12   0    6.00    0.73
   1  12   0    7.03    0.86
   1 -12   0    7.48    0.77
   2 -12   0    0.97    0.26
   2 -12   0    2.50    2.46
  -2  12   0    0.83    0.51
  -2  12   0    0.19    0.36
   2 -12   0    1.22    0.29
   2 -12   0    0.64    0.39
  -2 -12   0    0.50    2.08
   2  12   0    0.69    0.41
   2 -12   0    1.16    0.47
  -2 -12   0    1.11    0.57
  -2 -12   0    0.75    1.28
   2  12   0    0.31    0.33
   3 -12   0   -0.16    1.40
   3  12   0    3.84    0.64
   3 -12   0    3.96    0.65
  -3 -12   0   -0.23    1.09
  -3 -12   0    4.38    1.28
  -3  12   0    4.09    0.93
   3  12   0    2.15    1.97
   3 -12   0    3.56    0.89
  -4  12   0    3.95    0.87
   4  12   0    3.99    1.04
   4  12   0    1.44    1.80
   4  12   0    4.24    0.47
  -4 -12   0   -0.56    2.11
  -4 -12   0    3.86    1.08
  -4  12   0    4.06    0.99
   4 -12   0    1.74    2.53
   4 -12   0    4.07    0.44
   4 -12   0    4.95    1.12
   5  12   0    4.51    1.08
   5 -12   0    6.05    1.29
  -5  12   0    4.17    1.04
  -5  12   0    5.99    1.06
  -5 -12   0    4.70    1.21
  -5 -12   0    5.44    3.55
  -6 -12   0   -1.23    3.03
  -6 -12   0   -1.36    1.62
   0 -13   0   -0.84    1.73
   0 -13   0   -0.15    0.26
   0 -13   0   -0.38    0.15
   0  13   0   -0.33    0.23
   0 -13   0   -0.12    0.81
   0  13   0    0.11    0.32
   1 -13   0   20.90    1.31
   1 -13   0   20.40    1.54
   1 -13   0    9.32    4.78
  -1  13   0   17.90    1.60
  -1 -13   0   20.41    1.70
   1 -13   0   21.13    1.19
   1  13   0   17.74    1.42
  -1  13   0   19.53    1.63
   1  13   0   20.46    1.50
   2 -13   0    2.67    3.03
  -2 -13   0    4.00    1.09
   2 -13   0    5.43    0.91
   2 -13   0    3.49    0.40
   2 -13   0    5.48    0.52
  -2  13   0    3.91    0.93
   2  13   0    5.49    1.08
   2 -13   0    4.61    0.89
  -2 -13   0    1.61    2.95
  -2  13   0    2.80    0.90
   2  13   0    3.54    0.77
  -3 -13   0   -0.85    1.75
  -3 -13   0    0.95    1.25
   3  13   0    0.16    0.30
  -3  13   0    0.02    0.35
   3 -13   0   -0.35    0.39
   3 -13   0    0.10    0.32
   3  13   0    0.06    0.35
   3 -13   0    1.25    2.81
   3  13   0   -0.14    1.41
  -3  13   0   -0.01    0.42
  -3 -13   0    0.12    0.43
  -4  13   0    1.02    0.54
   4  13   0    0.34    1.46
  -4 -13   0    1.38    0.70
   4  13   0    0.70    0.41
  -4 -13   0   -0.08    1.34
   4 -13   0    2.45    0.81
   4 -13   0   -0.13    2.29
   4 -13   0    1.39    0.42
  -4  13   0    1.63    0.63
   4  13   0    0.99    2.35
   4  13   0    1.58    0.67
  -4 -13   0    1.91    2.40
  -5  13   0   13.86    1.63
  -5  13   0   11.24    1.61
   5  13   0   11.74    1.95
   5 -13   0   13.59    2.06
  -5 -13   0   12.73    1.61
  -6 -13   0   -1.30    3.25
  -6 -13   0   -0.18    0.61
  -6 -13   0    0.78    1.53
  -6  13   0    0.09    0.64
   0 -14   0    1.49    1.10
   0 -14   0    0.29    2.24
   0  14   0    1.73    0.71
   0  14   0    2.76    0.76
   0 -14   0    2.07    0.74
   1 -14   0    0.76    2.74
   1 -14   0    1.37    0.58
  -1 -14   0   -0.08    0.99
   1 -14   0    0.90    0.36
   1  14   0    0.72    0.46
  -1  14   0    0.96    0.53
  -1 -14   0    0.51    0.60
   1 -14   0    2.20    0.39
   1  14   0    1.24    0.52
  -2 -14   0    2.93    0.93
   2 -14   0    2.43    0.69
   2 -14   0    1.99    0.36
   2 -14   0    3.96    3.17
   2  14   0    3.75    0.90
  -2  14   0    2.13    0.81
   2 -14   0    2.02    0.68
  -2 -14   0    0.89    2.21
  -2  14   0    1.76    0.71
   2  14   0    2.36    0.70
   2 -14   0    2.99    0.40
   3 -14   0    1.58    2.88
   3  14   0    1.26    0.49
   3 -14   0    0.49    0.42
  -3 -14   0   -0.32    1.12
   3  14   0    0.15    1.65
   3 -14   0    1.02    0.61
   3  14   0    0.96    0.51
  -3  14   0    1.97    0.63
  -3 -14   0    0.59    0.58
  -3 -14   0    0.12    2.27
  -3  14   0    1.67    0.64
   4 -14   0    0.60    0.65
  -4  14   0    0.85    0.52
   4  14   0    0.84    0.50
  -4 -14   0    3.96    3.44
  -4 -14   0   -0.42    0.31
  -4 -14   0   -0.23    1.30
   4 -14   0    0.48    3.13
   4  14   0    0.18    0.41
  -4  14   0   -0.01    0.47
   4  14   0   -0.55    2.13
  -5 -14   0    0.71    0.56
  -5  14   0    3.59    0.95
  -5  14   0    0.09    0.69
  -5 -14   0    0.50    1.49
   5  14   0    1.90    0.86
  -5 -14   0    2.57    4.28
   5 -14   0    0.38    0.65
  -6 -14   0   -5.62    3.48
  -6 -14   0   -2.07    1.87
   0  15   0   -0.42    0.27
   0 -15   0    3.73    3.73
   0  15   0    0.15    0.29
   0 -15   0   -0.58    0.66
   0  15   0    0.30    0.58
   1  15   0    5.94    1.07
   1 -15   0    8.52    0.89
   1  15   0    7.46    1.40
   1 -15   0    7.66    1.33
  -1  15   0    7.44    1.27
  -1 -15   0    7.18    1.31
  -1  15   0    6.86    1.24
  -2  15   0    4.00    0.96
   2  15   0    2.84    0.77
   2 -15   0    3.75    4.34
  -2  15   0    3.85    1.02
   2 -15   0    3.80    0.92
   2 -15   0    2.50    0.73
   2 -15   0    3.33    0.38
  -2 -15   0    2.32    0.74
   2  15   0    2.31    0.62
  -2 -15   0   -0.09    1.89
  -3  15   0    0.34    0.55
  -3  15   0   -0.13    0.39
   3  15   0   -0.18    0.36
  -3 -15   0   -0.23    1.05
  -3 -15   0    0.72    2.67
   3 -15   0   -0.03    0.47
   3 -15   0    0.19    0.42
  -3 -15   0   -0.66    0.47
   3  15   0   -0.86    1.60
   3  15   0   -0.39    0.46
  -4 -15   0    0.56    1.31
   4  15   0    2.61    1.10
  -4 -15   0    0.10    3.53
  -4  15   0    3.02    0.84
   4 -15   0    3.24    0.98
   5 -15   0    1.49    0.97
  -5 -15   0   -0.83    1.50
  -5  15   0    1.32    0.91
  -5 -15   0   -2.99    3.92
  -6 -15   0   -0.11    2.11
   0  16   0   62.75    2.85
   0 -16   0   66.37    3.37
   0  16   0   61.77    3.10
  -1 -16   0   -1.38    2.80
   1  16   0    5.33    1.07
  -1 -16   0    4.41    1.05
   1 -16   0    4.50    1.09
   1  16   0    5.27    0.99
  -1  16   0    4.97    1.08
   1 -16   0   -0.59    2.91
  -1  16   0    5.05    1.22
   2 -16   0    0.30    0.50
  -2  16   0   -0.60    0.42
  -2 -16   0   -0.27    1.28
  -2 -16   0   -0.07    0.59
  -2 -16   0   -0.31    3.03
   2  16   0    0.28    0.49
   2 -16   0    0.60    0.49
   2 -16   0   -0.45    3.38
   2  16   0    0.44    0.44
  -2  16   0   -0.46    0.42
  -3 -16   0    1.01    3.75
   3 -16   0    2.97    4.39
   3  16   0    2.23    0.62
  -3  16   0    2.22    0.88
  -3  16   0    2.24    0.85
   3 -16   0    2.31    0.72
   3  16   0    3.30    2.74
  -3 -16   0    4.47    1.18
   3  16   0    2.96    0.96
   3 -16   0    1.84    0.73
  -3 -16   0   -0.25    1.29
   4 -16   0    0.77    4.12
  -4 -16   0   -0.60    1.46
   4  16   0    1.12    0.65
  -4 -16   0   -4.63    4.32
  -4 -16   0   -0.19    0.64
   4 -16   0   -0.32    0.49
  -4  16   0    0.08    0.57
  -4  16   0    0.06    0.55
  -5 -16   0   -0.80    1.65
  -5 -16   0    4.17    4.10
   0 -17   0    1.05    0.60
   0  17   0    0.50    0.52
   0 -17   0    5.41    4.96
   0  17   0   -0.15    0.43
   1  17   0    1.11    0.63
   1 -17   0    2.13    3.69
  -1 -17   0   -0.10    0.92
   1  17   0   -0.04    0.49
  -1  17   0    1.16    0.70
  -1 -17   0   -2.44    2.93
   1 -17   0    1.24    0.50
  -1 -17   0    0.41    0.53
  -2  17   0    5.69    1.30
  -2  17   0    2.52    0.82
  -2 -17   0   -2.08    3.10
   2  17   0    3.13    0.86
   2 -17   0    2.78    0.86
   2 -17   0    4.43    1.09
   2 -17   0    1.88    3.35
  -2 -17   0    3.62    1.02
   2  17   0    3.41    0.95
  -3 -17   0    1.60    0.67
  -3 -17   0    1.01    4.44
   3 -17   0    0.75    0.66
   3 -17   0    0.72    0.66
  -3  17   0    2.14    0.89
   3  17   0    1.07    0.64
  -3 -17   0    0.49    1.73
   3 -17   0   -5.33    3.64
   3  17   0    1.18    0.85
  -3  17   0    0.66    0.77
   4 -17   0   -0.62    4.60
  -4 -17   0   -1.27    1.51
  -4 -17   0   -0.68    3.84
   0 -18   0   -0.19    3.69
   0  18   0    2.72    0.79
   0  18   0    5.18    1.19
   0 -18   0    3.92    1.06
   1 -18   0    0.65    0.74
   1 -18   0    2.03    4.19
  -1  18   0   -0.74    0.32
  -1  18   0    0.39    0.82
  -1 -18   0   -0.11    0.46
   1  18   0   -0.76    0.39
   1  18   0    0.13    0.56
  -2 -18   0   -0.66    1.17
  -2 -18   0    0.61    0.60
   2 -18   0    2.23    0.66
  -2 -18   0   -1.65    3.42
   2 -18   0   -1.23    3.79
   2  18   0    2.31    0.82
   2 -18   0    2.93    0.78
  -2  18   0    0.56    0.76
   3 -18   0   -1.28    4.44
  -3 -18   0    2.52    4.65
   3 -18   0    1.96    0.88
  -3 -18   0   -0.41    1.68
   3  18   0    3.23    1.07
   4 -18   0    1.91    0.95
   4 -18   0   -0.36    6.27
   0  19   0    0.17    0.71
   0 -19   0   -2.63    3.05
   1 -19   0   -2.17    3.99
   1  19   0    2.71    0.89
  -1 -19   0    4.60    1.19
  -1  19   0    4.98    1.18
  -1 -19   0    1.25    5.48
   1 -19   0    2.95    0.98
  -1  19   0    2.65    0.78
   2 -19   0    2.25    4.14
   2  19   0    2.23    0.93
   2 -19   0    1.57    0.86
   2  19   0    2.69    0.86
   3 -19   0   -0.57    5.33
   4 -19   0   -4.06    7.46
   0  20   0    1.74    0.71
   0  20   0    0.58    0.52
   0 -20   0    0.61    0.74
   1  20   0    0.90    0.81
  -1  20   0    0.55    0.64
   1  20   0    0.40    0.72
   1 -20   0    0.18    0.65
   2 -20   0    1.09    0.81
   2  20   0   -0.41    0.77
  -1  21   0    1.98    1.31
   2 -21   0    0.69    2.06
   1   0  -1  482.38    6.78
  -1   0   1  494.68    6.65
  -1   0  -1  500.30    6.70
   1   0  -1  495.72    7.13
  -1   0   1  503.93    7.11
  -1   0  -1  503.99    6.41
  -1   0   1  508.06    7.27
   1   0  -1  507.44    7.29
   1   0   1  505.90    7.16
   1   0   1  510.03    7.06
  -1   0   1  503.13    6.86
   1   0  -1  495.42    6.65
  -1   0  -1  501.39    7.16
  -1   0  -1  502.17    7.01
  -2   0  -1   -0.13    3.06
   2   0   1    2.60    0.25
   2   0   1    3.28    0.50
   2   0  -1    2.57    0.43
  -2   0  -1    3.67    0.29
  -2   0  -1    3.96    2.06
  -2   0   1    2.57    0.45
  -2   0   1    2.56    0.46
  -2   0   1    2.11    1.08
  -2   0  -1    3.24    0.51
  -2   0  -1    2.97    0.23
  -2   0   1    1.76    2.83
  -2   0  -1    2.90    0.48
  -2   0   1    3.19    0.27
  -2   0   1    3.50    0.34
  -2   0   1    2.80    0.23
   2   0   1    2.59    0.43
   2   0   1   -1.21    3.05
   2   0  -1   -0.05    3.41
  -2   0  -1    2.88    0.28
   2   0  -1    3.16    0.26
   2   0  -1    3.39    0.57
   2   0  -1    2.60    0.47
  -2   0   1    2.79    0.43
  -2   0  -1    3.35    0.41
   2   0   1    2.68    0.46
  -3   0   1    0.56    0.18
  -3   0   1    0.55    0.14
   3   0   1   -0.65    2.48
  -3   0   1    0.53    0.25
   3   0  -1    0.36    0.26
  -3   0  -1    0.07    0.20
  -3   0  -1    0.50    0.14
  -3   0   1    0.39    0.29
   3   0   1    0.66    0.29
  -3   0  -1    0.42    0.17
   3   0   1    0.49    0.33
  -3   0   1    0.81    0.33
   3   0  -1    0.89    0.33
  -3   0   1    2.24    3.96
  -3   0   1    0.53    0.21
  -3   0  -1    0.21    0.24
   3   0  -1   -1.17    2.96
   3   0  -1    0.19    0.28
  -3   0  -1    2.32    1.86
  -3   0   1    0.85    0.86
  -3   0  -1    0.37    0.16
   3   0   1    0.03    0.24
  -3   0  -1    0.39    0.23
  -4   0  -1   19.19    0.85
   4   0  -1   20.77    1.59
  -4   0  -1   15.79    2.81
  -4   0   1   19.78    0.94
   4   0   1   22.93    1.53
   4   0   1   17.53    1.39
  -4   0   1   20.10    0.77
   4   0  -1   21.57    1.50
  -4   0   1   22.48    1.03
   4   0  -1   18.84    1.35
  -4   0  -1   20.23    0.76
  -4   0  -1   21.63    1.09
  -5   0  -1   19.52    0.90
  -5   0   1   21.57    1.04
  -5   0   1   20.61    1.03
   5   0  -1   22.68    1.85
  -5   0  -1   21.14    2.83
   5   0   1   21.58    1.67
  -5   0   1   21.44    0.75
   5   0  -1   21.01    1.70
   5   0   1   18.91    1.55
   5   0  -1   22.83    1.67
  -5   0   1   19.81    0.74
   5   0   1   19.51    1.67
  -5   0  -1   19.56    0.87
   6   0   1    0.78    0.63
   6   0  -1    0.19    0.48
   6   0  -1   -0.16    2.23
   6   0   1   -0.51    0.53
   6   0   1    0.82    0.45
   6   0   1   -0.26    2.23
   6   0  -1    1.22    0.51
   6   0  -1    0.44    0.56
  -6   0   1    0.02    0.22
  -6   0  -1    0.07    0.14
   7   0  -1    5.97    1.48
   7   0  -1    6.10    1.20
   7   0   1    6.30    1.39
   7   0   1    6.35    1.31
   7   0   1    4.61    1.08
   1   1  -1  153.11    2.58
  -1   1   1  154.74    2.84
  -1   1   1  156.61    2.46
   1  -1   1  176.83   11.67
  -1  -1  -1  147.78    2.78
   1  -1   1  156.12    2.24
   1  -1   1  159.97    2.64
  -1   1   1  135.25   10.91
  -1  -1  -1  157.17    2.66
   1   1  -1  156.28    2.85
  -1  -1  -1  152.06    2.34
  -1   1   1  149.95    2.78
  -1  -1  -1  152.94    2.22
   1  -1   1  157.43    2.61
  -1   1   1  157.10    2.58
  -1  -1  -1  155.53    2.63
  -1  -1  -1  167.82    8.07
  -1   1   1  154.56    2.09
   1   1  -1  151.10    2.74
   1  -1   1  152.51    2.50
  -1  -1  -1  150.30    2.56
   1  -1   1  151.80    2.22
   1   1  -1  150.35    2.51
   1  -1   1  150.20    2.81
   1   1   1  158.61    2.72
   1   1   1  154.23    2.59
   1  -1  -1  150.05    2.81
  -1   1  -1  155.31    2.84
   1  -1  -1  154.21    2.85
  -1  -1   1  152.62    2.56
  -1   1  -1  153.34    2.22
  -1  -1   1  156.48    2.79
  -1   1  -1  153.10    2.52
  -1   1  -1  148.77    2.21
  -1   1  -1  155.01    2.62
  -1   1  -1  160.00    2.57
   1   1   1  153.19    2.22
   1  -1  -1  154.87    2.45
  -1   1  -1  124.88   10.26
  -1  -1   1  153.58    2.54
  -1  -1   1  157.07    2.81
   1  -1  -1  151.36    2.13
   1  -1  -1  134.41   11.20
   1   1   1  155.44    2.84
  -2   1   1   16.96    0.97
   2   1  -1   16.30    0.89
  -2  -1  -1   16.38    0.50
   2   1  -1   17.94    1.05
  -2   1   1   16.73    0.96
  -2   1   1   16.42    0.44
   2  -1   1   17.52    0.70
  -2   1   1   16.34    0.73
  -2   1   1   17.21    0.68
  -2   1   1   16.51    0.81
   2  -1   1   18.65    0.92
   2   1  -1   16.95    0.93
  -2  -1  -1   17.56    0.75
   2  -1   1   16.48    0.98
   2  -1   1   16.36    0.50
  -2  -1  -1   16.71    0.88
  -2  -1  -1   15.38    0.87
  -2  -1  -1   16.53    0.94
   2  -1   1   14.87    0.88
   2   1  -1   16.16    0.70
  -2  -1   1   15.70    0.87
   2  -1  -1   16.96    1.01
  -2  -1   1   16.96    0.40
  -2   1  -1   16.57    0.70
  -2  -1   1   16.27    0.69
   2  -1  -1   17.34    0.85
  -2   1  -1   16.26    0.51
  -2  -1   1   16.45    0.38
   2  -1  -1   16.89    0.69
   2   1   1   16.00    0.93
  -2   1  -1   16.50    0.97
  -2  -1   1   17.21    0.96
  -2   1  -1   16.71    0.88
   2   1   1   17.44    0.99
  -2  -1   1   17.81    0.96
  -2   1  -1   16.94    0.53
  -2  -1   1   16.41    0.71
   2  -1  -1   17.66    1.02
  -2   1  -1   16.76    0.53
   2   1   1   16.51    0.49
  -2   1  -1   17.88    0.87
   2   1   1   15.80    0.87
  -3  -1  -1    4.60    0.70
  -3   1   1    2.27    3.65
  -3  -1  -1    4.72    0.30
   3   1  -1    2.50    4.58
  -3  -1  -1    4.06    0.68
   3   1  -1    4.83    0.78
  -3   1   1    5.59    0.49
  -3  -1  -1    4.69    0.37
   3  -1   1    4.02    0.72
   3  -1   1    0.27    2.98
  -3   1   1    4.10    0.76
  -3  -1  -1    2.55    3.75
  -3   1   1    5.17    0.76
   3   1  -1    4.20    0.66
   3  -1   1    5.30    0.76
   3   1  -1    4.48    0.72
  -3  -1  -1    5.37    0.61
  -3   1   1    4.55    0.40
  -3  -1  -1   12.76    3.91
  -3   1   1    4.62    0.28
  -3   1   1    4.23    0.69
  -3  -1  -1    4.10    0.42
   3  -1   1    4.34    0.71
  -3  -1   1    9.04    2.43
  -3   1  -1    0.93    4.30
  -3   1  -1    4.72    0.69
  -3  -1   1    4.53    0.25
  -3  -1   1   14.69    7.32
  -3   1  -1    4.44    0.31
   3   1   1    0.13    2.91
   3  -1  -1    5.17    0.82
   3  -1  -1    5.37    0.86
  -3   1  -1    3.55    0.60
   3  -1  -1    0.87    4.10
  -3   1  -1    4.29    0.43
   3   1   1    4.88    0.71
  -3  -1   1    4.43    0.69
   3   1   1    4.58    0.78
  -3  -1   1    4.13    0.43
  -3  -1   1    4.39    0.46
  -3  -1   1    4.60    0.70
   3  -1  -1    4.73    0.55
  -3  -1   1    4.69    0.24
  -3   1  -1    4.79    0.34
   3   1   1    6.15    0.85
  -3   1  -1    4.64    0.34
  -4  -1  -1    6.20    0.45
  -4  -1  -1    6.53    0.58
  -4  -1  -1    6.15    0.46
   4  -1   1    7.13    1.07
  -4   1   1    6.37    0.34
   4   1  -1    6.53    1.00
   4   1  -1    7.29    1.05
  -4  -1  -1   10.92    2.43
  -4   1   1    5.96    0.49
  -4  -1  -1    5.81    0.35
   4   1  -1    7.09    1.18
   4  -1   1    7.34    0.88
  -4   1   1    6.78    0.58
  -4   1  -1    7.38    0.57
   4  -1  -1    5.52    0.91
  -4  -1   1    8.02    1.84
   4   1   1    5.56    0.91
  -4  -1   1    7.58    0.58
  -4   1  -1    6.69    0.41
  -4   1  -1    5.60    0.39
   4   1   1    5.30    0.90
   4  -1  -1    6.86    0.81
   4  -1  -1    6.09    1.03
  -4   1  -1    6.18    0.38
  -4  -1   1    5.31    0.53
   4  -1  -1    1.93    3.88
   4   1   1    6.11    0.99
  -5   1   1   12.10    0.81
   5   1  -1   13.50    1.44
  -5  -1  -1   13.80    0.84
  -5   1   1   11.79    0.72
   5  -1   1   14.11    1.48
  -5  -1  -1   12.20    0.62
  -5  -1  -1   13.31    0.61
   5  -1   1   12.86    1.31
   5  -1   1    8.60    1.30
   5   1  -1    9.93    1.21
   5   1  -1   11.35    1.29
  -5   1   1   12.87    0.77
   5   1   1   12.84    1.41
  -5  -1   1   12.60    0.85
  -5   1  -1   11.85    0.44
   5  -1  -1   11.66    1.60
   5  -1  -1   12.05    1.18
   5  -1  -1   14.08    1.44
  -5   1  -1   13.07    0.78
   5   1   1   13.09    1.32
  -5  -1   1   12.20    0.79
   5   1   1   14.89    1.38
   6  -1   1   26.88    2.10
  -6  -1  -1   27.45    1.16
   6   1  -1   29.56    2.51
   6   1  -1   25.66    2.32
   6   1  -1   27.40    2.31
   6  -1   1   26.77    1.98
   6  -1  -1   27.35    2.34
   6   1   1   30.54    2.16
   6  -1  -1   25.55    1.89
  -6  -1   1   26.19    1.10
  -6   1  -1   25.51    1.03
   6   1   1   24.89    2.00
  -6  -1   1   27.90    1.18
   6  -1  -1   27.74    2.19
   6   1   1   26.05    2.22
   7   1  -1    0.12    3.37
   7  -1   1   -0.02    0.70
   7   1  -1   -0.57    0.83
   7  -1   1    0.72    0.75
   7   1  -1    0.20    0.65
   7  -1   1    1.86    0.85
   7  -1  -1    2.01    0.87
   7  -1  -1    1.14    0.78
   7   1   1    1.14    0.66
   7  -1  -1    0.37    2.97
   7   1   1    1.29    0.67
   7   1   1    1.38    0.75
   0  -2   1   99.22    3.67
   0   2  -1  113.24    4.08
   1   2  -1  267.28    4.28
  -1   2   1  273.67    3.76
  -1  -2  -1  271.10    4.33
   1   2  -1  282.77    4.83
   1   2  -1  275.14    3.97
  -1   2   1  268.24    4.27
  -1   2   1  244.96   15.85
   1  -2   1  271.61    3.80
   1  -2   1  274.96    4.02
   1  -2   1  275.44    4.25
  -1  -2  -1  274.05    4.27
   1   2  -1  268.31    4.47
  -1   2   1  272.10    4.46
   1   2  -1  274.00    3.70
  -1  -2  -1  273.53    4.15
   1  -2   1  275.18    4.51
  -1  -2  -1  274.42    4.51
  -1  -2   1  276.92    4.34
  -1   2  -1  267.84    3.79
  -1   2  -1  272.77    4.27
  -1  -2   1  276.62    4.40
  -1   2  -1  269.29    4.01
   1  -2  -1  277.71    3.80
   1   2   1  265.50    4.52
  -1   2  -1  279.59   16.35
   1   2   1  269.73    4.14
   1   2   1  269.63    3.83
   1  -2  -1  275.07    3.70
  -1   2  -1  265.26    3.93
   1  -2  -1  273.63    4.54
  -1  -2   1  272.27    4.48
   1  -2  -1  268.92    4.26
  -1   2  -1  276.21    4.21
  -1  -2   1  270.75    3.92
  -1   2  -1  268.93    4.49
   1   2   1  269.55    4.33
  -2  -2  -1   12.31    0.36
   2  -2   1   12.51    0.79
   2   2  -1   11.80    0.73
   2  -2   1   12.51    0.54
   2  -2   1   11.30    0.70
  -2  -2  -1   12.38    0.60
   2   2  -1   10.65    0.65
  -2   2   1   12.98    0.67
  -2   2   1   12.05    0.86
  -2   2   1   12.28    0.65
  -2   2   1   11.53    0.81
   2  -2   1   12.87    0.90
  -2  -2  -1   11.30    0.81
  -2   2   1   11.80    0.65
  -2  -2  -1   12.64    0.76
  -2  -2  -1   12.38    0.78
  -2  -2  -1   12.48    0.72
   2   2  -1   12.20    0.84
   2   2  -1   11.26    0.84
  -2   2  -1   12.20    0.67
   2   2   1   11.97    0.72
  -2   2  -1   12.71    0.68
  -2   2  -1   12.31    0.77
  -2   2  -1   12.45    0.87
  -2  -2   1   13.28    0.75
   2  -2  -1   11.24    0.85
   2   2   1   11.67    0.84
  -2   2  -1   12.23    0.34
   2   2   1   12.30    0.35
  -2  -2   1   12.74    0.85
  -2  -2   1   13.02    0.86
   2  -2  -1   12.57    0.65
   2  -2  -1   12.87    0.91
  -2   2  -1   13.25    0.54
   2   2   1   10.95    0.80
  -2  -2   1   12.19    0.70
   2  -2  -1   12.22    0.67
  -3   2   1   54.83    1.62
   3   2  -1   51.26    2.21
  -3  -2  -1   56.13    1.75
  -3  -2  -1   54.47    1.47
   3   2  -1   53.62    2.11
   3  -2   1   56.12    2.13
   3  -2   1   55.14    1.27
   3  -2   1   54.37    2.23
  -3   2   1   53.79    2.13
   3  -2   1   54.35    1.94
  -3  -2  -1   54.72    2.00
   3   2  -1   56.13    2.00
  -3   2   1   55.34    1.62
  -3   2   1   54.67    1.81
  -3   2  -1   56.04    1.67
  -3  -2   1   54.42    1.71
  -3   2  -1   55.14    1.32
   3   2   1   52.48    2.16
  -3   2  -1   54.94    1.99
  -3  -2   1   61.99    5.42
   3  -2  -1   54.64    2.22
   3  -2  -1   54.13    2.25
  -3  -2   1   56.34    1.63
   3  -2  -1   54.91    1.54
   3  -2  -1   57.11    1.88
   3   2   1   53.94    1.96
   3   2   1   58.63    2.26
  -3  -2   1   54.63    1.95
   4  -2   1    0.59    0.42
   4  -2   1    1.46    0.44
   4   2  -1    1.92    0.55
  -4  -2  -1    0.10    1.36
  -4  -2  -1    1.06    0.34
  -4  -2  -1    1.39    0.30
   4  -2   1    1.38    0.54
  -4   2   1    2.01    0.37
   4   2  -1    0.74    0.46
  -4  -2  -1    4.14    1.98
   4   2  -1    0.74    0.41
  -4  -2  -1    1.52    0.30
  -4   2   1    2.05    0.44
   4  -2   1   -0.25    1.54
  -4   2   1    0.98    0.28
   4   2  -1    0.01    1.35
   4  -2  -1    1.08    0.46
  -4  -2   1    1.86    0.40
   4   2   1   -1.24    1.32
   4   2   1    1.78    0.59
  -4  -2   1    5.24    1.77
   4  -2  -1    1.43    0.55
   4  -2  -1    1.85    0.59
   4   2   1    1.56    0.52
  -4   2  -1    1.15    0.32
   4  -2  -1   -0.42    1.38
   4   2   1    0.37    0.44
  -4  -2   1    0.90    0.32
  -4   2  -1    1.35    0.24
  -5  -2  -1   24.86    0.99
  -5  -2  -1   24.25    1.28
   5   2  -1   24.29    1.98
   5  -2   1   25.35    1.90
  -5   2   1   27.05    1.24
   5  -2   1   24.32    1.70
   5  -2   1   25.29    1.90
   5   2  -1   26.32    1.87
   5   2  -1   26.66    1.81
  -5  -2  -1   25.32    1.05
  -5   2   1   26.39    1.16
   5  -2  -1   23.67    1.87
  -5  -2   1   25.53    1.29
  -5  -2   1   25.20    1.21
  -5   2  -1   27.14    1.29
   5   2   1   24.17    1.71
   5   2   1   26.68    2.01
   5  -2  -1   27.63    2.04
  -5  -2   1   26.78    1.27
   5  -2  -1   24.73    1.63
   5   2   1   24.54    1.82
   6  -2   1    0.99    0.55
  -6   2   1    0.10    0.26
  -6  -2  -1    0.79    0.80
   6   2  -1    0.49    2.24
   6   2  -1   -0.36    0.54
  -6  -2  -1   -0.47    0.26
   6   2  -1    0.27    0.50
   6  -2   1    0.61    0.63
   6  -2   1   -0.04    0.56
   6   2  -1   -0.74    0.29
  -6  -2  -1   -0.85    1.05
   6  -2  -1    0.15    0.52
   6   2   1   -0.20    0.41
  -6  -2   1    0.12    0.21
   6   2   1   -0.50    0.37
   6   2   1    0.26    2.31
  -6  -2   1   -0.69    0.78
   6   2   1    0.22    0.55
  -6  -2   1    0.38    0.37
   6  -2  -1    0.00    0.33
  -6   2  -1   -0.09    0.25
  -6  -2   1   -0.06    0.25
   6  -2  -1   -0.10    0.48
   7  -2   1    0.88    0.75
   7   2  -1   -2.34    3.51
   7   2  -1    2.43    0.83
   7  -2   1    2.71    0.88
   7  -2   1    1.79    0.84
   7   2  -1    1.24    0.73
   7   2   1    2.87    0.97
   7  -2  -1    2.78    5.26
   7   2   1    3.19    1.09
   7  -2  -1    1.38    0.85
   7   2   1    1.93    0.64
   1   3  -1  433.29    6.68
  -1  -3  -1  436.69    5.92
  -1  -3  -1  425.83    6.69
   1  -3   1  430.70    6.50
   1  -3   1  434.83    6.37
  -1   3   1  423.79    6.53
  -1   3   1  429.60    6.64
   1   3  -1  436.32    5.97
   1   3  -1  435.92    5.80
   1   3  -1  430.11    6.60
   1  -3   1  406.88    5.95
   1  -3   1  435.02    6.05
   1   3  -1  430.30    6.60
  -1  -3  -1  442.06    6.51
  -1  -3  -1  423.16    6.62
  -1  -3   1  438.51    6.52
   1  -3  -1  435.99    5.68
  -1   3  -1  428.19    6.34
  -1   3  -1  436.78    6.06
  -1  -3   1  433.84    6.58
  -1   3  -1  427.99    6.51
   1  -3  -1  429.44    5.97
   1   3   1  439.92    6.55
   1  -3  -1  434.90    6.57
   1   3   1  435.77    6.49
   1   3   1  425.15    6.71
  -1  -3   1  427.80    6.70
   1  -3  -1  427.62    6.70
  -1   3  -1  433.66    6.70
  -1  -3   1  427.52    6.61
  -2   3   1    1.91    0.41
   2  -3   1    2.07    0.46
   2   3  -1    8.39    4.21
   2  -3   1    2.12    0.16
   2  -3   1    2.59    0.39
  -2  -3  -1   10.89    4.05
  -2   3   1    3.04    5.61
   2  -3   1    0.75    4.10
   2   3  -1    1.94    0.38
  -2   3   1    1.92    0.36
  -2  -3  -1    1.51    0.33
  -2  -3  -1    2.26    0.42
  -2   3   1    2.48    0.28
  -2  -3  -1    1.70    0.34
  -2  -3  -1    7.64    2.98
  -2  -3  -1    2.64    0.39
   2  -3   1    2.32    0.33
   2   3  -1    1.64    0.42
   2   3  -1    2.70    0.51
  -2   3   1    2.33    0.39
  -2  -3   1    2.28    0.37
   2  -3  -1    2.30    0.50
   2   3   1    2.86    0.52
   2   3   1   -1.04    2.26
  -2   3  -1    1.99    0.37
   2  -3  -1    2.25    0.32
  -2   3  -1    2.26    4.54
   2   3   1    2.08    0.19
  -2   3  -1    1.90    0.31
   2  -3  -1    2.49    0.39
   2   3   1    2.19    0.36
   2   3   1    2.12    0.45
   2  -3  -1    5.90    4.73
  -2   3  -1    2.72    0.32
  -2   3  -1    2.69    0.45
  -2   3  -1    2.21    0.16
  -2  -3   1    7.62    3.04
  -2  -3   1    2.93    0.48
   3  -3   1    4.43    0.74
  -3   3   1    4.41    0.47
  -3  -3  -1    3.82    0.42
   3   3  -1    3.92    0.57
   3  -3   1    4.45    0.55
   3  -3   1    4.59    0.41
   3  -3   1    3.18    0.66
   3   3  -1    4.15    0.63
   3   3  -1    4.24    0.76
  -3   3   1    4.12    0.50
  -3   3   1    5.17    0.75
  -3   3   1    6.88    1.17
  -3  -3  -1    4.31    0.53
   3   3  -1    4.11    3.91
   3  -3   1    0.07    4.24
   3   3  -1    4.59    0.76
  -3  -3  -1   10.78    3.98
  -3   3   1    4.72    0.49
  -3   3  -1    3.81    0.56
  -3  -3   1    4.06    0.52
   3  -3  -1   -0.79    3.77
   3   3   1    4.77    0.81
   3  -3  -1    3.03    0.63
  -3   3  -1    4.63    0.39
  -3   3  -1    3.85    0.62
   3  -3  -1    5.11    0.54
  -3   3  -1    4.10    0.49
   3  -3  -1    3.98    0.73
  -3  -3   1   11.49    3.47
   3  -3  -1    3.74    0.44
   3   3   1   -0.57    2.96
  -3  -3   1    4.36    0.53
   3   3   1    3.27    0.54
   3   3   1    4.21    0.74
   4   3  -1   -0.02    1.37
  -4  -3  -1    2.48    1.62
  -4  -3  -1    2.05    0.36
  -4  -3  -1    1.59    0.32
   4  -3   1    2.13    0.69
   4  -3   1    2.39    0.67
  -4   3   1    1.87    0.37
  -4   3   1    2.11    0.47
  -4   3   1    2.02    0.50
   4   3  -1    2.10    0.63
   4  -3   1    1.83    0.52
   4  -3   1    1.26    1.46
   4   3  -1    0.40    1.80
  -4  -3  -1    1.71    0.74
   4   3  -1    1.62    0.50
   4   3  -1    0.93    0.51
  -4  -3  -1    1.96    0.46
  -4  -3  -1    1.02    1.09
   4  -3  -1    1.02    0.28
   4   3   1    1.37    0.50
   4  -3  -1    2.39    0.67
  -4  -3   1    1.40    0.37
  -4   3  -1    2.17    0.31
  -4  -3   1    1.66    0.70
   4   3   1   -0.31    1.51
   4  -3  -1    1.28    1.72
  -4  -3   1    2.41    0.50
  -4   3  -1    1.97    0.45
  -4   3  -1    1.86    0.88
   4   3   1    2.07    0.60
  -4  -3   1    0.18    0.90
  -4  -3   1    1.89    0.50
   4  -3  -1    2.14    0.66
   4   3   1    2.07    0.55
   4  -3  -1    2.46    0.56
  -5   3   1    3.10    0.57
   5   3  -1    3.40    0.86
   5   3  -1   -0.17    1.80
   5  -3   1    3.48    0.76
  -5  -3  -1    3.66    0.53
   5   3  -1    3.08    0.77
   5  -3   1    0.07    2.49
  -5   3   1    3.24    0.52
   5  -3   1    3.31    0.87
  -5  -3  -1    3.01    0.44
   5   3  -1    5.32    1.14
  -5  -3  -1    1.18    0.92
  -5  -3  -1    3.17    0.62
   5  -3   1    3.23    0.90
  -5   3  -1    3.90    0.65
   5  -3  -1    3.05    0.86
  -5   3  -1    3.08    0.26
   5   3   1    3.91    0.93
   5  -3  -1   -0.13    1.74
  -5  -3   1    3.31    0.55
  -5  -3   1    1.54    1.39
   5   3   1    3.54    0.82
  -5   3  -1    2.17    1.16
   5   3   1    4.21    1.00
   5  -3  -1    3.59    0.85
  -5  -3   1    2.92    0.53
  -5  -3   1    2.74    0.58
   5  -3  -1    4.38    0.79
   6  -3   1    0.66    0.59
  -6  -3  -1    0.37    0.75
   6  -3   1    0.96    0.51
   6   3  -1    0.79    0.56
   6   3  -1    0.83    0.60
  -6  -3  -1    0.52    0.36
  -6  -3  -1    1.07    0.45
   6   3  -1    0.17    2.75
   6  -3   1   -0.14    0.49
  -6  -3  -1   -0.42    1.38
   6   3  -1    0.07    0.59
  -6   3   1    0.20    0.36
   6  -3  -1   -1.12    2.12
   6   3   1    0.46    0.57
   6  -3  -1    0.55    0.47
   6   3   1    0.99    0.53
  -6  -3   1    0.58    0.34
  -6   3  -1    0.10    0.27
  -6  -3   1    0.92    1.12
   6   3   1    0.22    0.58
  -6  -3   1    1.05    0.42
  -6  -3   1   -0.09    0.39
   6   3   1    0.19    2.73
   6  -3  -1    1.35    0.60
   7   3  -1   -1.38    3.12
   7   3  -1   -0.17    0.72
   7  -3   1    0.29    0.62
   7  -3   1   -1.62    0.87
   7   3  -1    1.00    0.75
   7   3   1   -0.52    0.58
   7   3   1    0.01    0.60
   0  -4  -1   24.65    0.76
   0   4  -1   25.32    1.04
   0  -4   1   24.72    0.98
   0  -4  -1   24.25    1.04
   0   4  -1   26.16    0.96
   0   4  -1   25.05    0.82
   0   4   1   23.78    0.94
   0  -4  -1   25.66    0.99
   0  -4   1   24.46    1.02
   0  -4  -1   25.41    0.83
   0   4  -1   24.82    0.97
   0  -4   1   25.14    0.72
   0   4   1   22.88    1.02
  -1  -4  -1  133.81    2.93
   1  -4   1  136.40    2.51
   1   4  -1  135.78    2.44
  -1  -4  -1  138.89    2.10
  -1  -4  -1  135.08    2.95
   1   4  -1  133.27    2.90
  -1   4   1  136.82    2.88
  -1   4   1  134.73    2.90
   1  -4   1  136.67    2.81
   1   4  -1  139.75    2.87
   1  -4   1  137.72    2.91
  -1  -4  -1  139.56    2.92
   1   4   1  137.85    2.94
  -1  -4   1  139.37    2.75
   1  -4  -1  135.40    2.90
  -1  -4   1  137.69    2.97
  -1   4  -1  139.36    2.80
  -1  -4   1  135.51    2.91
   1   4   1  130.35    2.90
   1  -4  -1  134.85    2.47
   1  -4  -1  137.18    2.94
   1   4   1  135.95    2.80
  -1   4  -1  137.33    2.86
  -1   4  -1  138.99    2.93
   1   4   1  135.84    2.88
  -1  -4   1  135.00    2.96
  -1   4  -1  134.15    2.48
   2   4  -1    3.99    0.38
  -2  -4  -1    4.22    0.67
  -2  -4  -1    4.20    0.50
   2   4  -1   12.50    4.89
  -2   4   1    3.62    0.51
  -2   4   1    4.41    0.31
   2  -4   1    3.76    0.43
   2   4  -1    3.16    0.57
  -2   4   1    3.74    0.63
  -2  -4  -1    4.09    0.62
   2   4  -1    3.59    0.25
  -2  -4  -1    4.34    0.42
  -2  -4  -1    4.74    0.49
  -2   4   1    3.41    0.57
   2  -4   1    3.44    0.27
   2   4  -1    4.88    0.74
  -2   4   1    1.61    4.87
  -2   4   1    4.37    0.59
   2   4  -1    4.14    0.51
   2  -4   1    3.30    0.60
   2   4   1    4.23    0.31
   2  -4  -1    1.41    4.64
  -2   4  -1    3.89    0.31
  -2  -4   1    3.61    0.53
  -2   4  -1    3.94    0.65
  -2  -4   1    4.10    0.66
  -2  -4   1    4.41    0.39
  -2   4  -1    4.65    0.64
   2  -4  -1    4.32    0.24
  -2  -4   1    4.32    0.48
  -2   4  -1    7.14    1.43
  -2  -4   1    4.05    0.61
  -2   4  -1    5.87    5.35
   2   4   1    7.98    3.50
   2  -4  -1    4.19    0.46
   2   4   1    3.59    0.59
  -2   4  -1    3.61    0.53
  -2   4  -1    4.09    0.42
   2  -4  -1    4.59    0.71
   2   4   1    4.26    0.66
   2  -4  -1    4.25    0.36
   3  -4   1    8.60    0.62
  -3  -4  -1   11.32    3.99
  -3   4   1    8.60    2.17
   3   4  -1   18.94    5.82
   3   4  -1    9.01    0.77
   3   4  -1    8.59    0.72
   3  -4   1    2.39    4.52
  -3   4   1    8.33    0.59
  -3  -4  -1    8.93    0.81
   3   4  -1    8.78    0.93
  -3   4   1    5.34    1.69
  -3   4   1    7.60    0.83
   3  -4   1    8.69    0.72
  -3   4   1    9.14    0.75
  -3  -4  -1    8.16    0.71
  -3   4   1    9.26    0.72
  -3  -4  -1    8.96    0.68
   3   4  -1    9.23    0.93
   3  -4   1    9.74    0.98
   3   4   1    8.38    0.69
   3   4   1    8.56    0.94
   3  -4  -1    8.30    0.96
  -3  -4   1   11.95    4.08
   3  -4  -1    2.20    4.08
   3  -4  -1    8.49    0.64
  -3   4  -1    9.13    0.85
  -3   4  -1    8.96    0.60
  -3  -4   1    9.51    0.74
   3  -4  -1    9.52    0.70
  -3   4  -1    8.57    0.63
  -3   4  -1   10.50    3.20
  -3  -4   1    9.25    0.74
   3   4   1    9.02    0.92
  -3   4  -1    8.18    0.73
  -3  -4   1    9.80    0.84
   4   4  -1    1.00    1.56
  -4  -4  -1    2.46    1.49
   4   4  -1    2.67    0.69
  -4   4   1    1.89    0.84
   4  -4   1    3.66    0.69
  -4  -4  -1    3.63    0.65
   4  -4   1    3.88    0.83
   4  -4   1    3.28    0.38
  -4  -4  -1    3.30    0.51
  -4  -4  -1    4.12    1.92
  -4   4   1    2.98    0.56
   4   4  -1    3.21    0.80
  -4  -4  -1    3.10    1.47
  -4   4   1    3.52    0.53
  -4   4   1    3.61    0.53
   4   4  -1    3.37    0.67
  -4   4  -1    3.23    0.57
  -4   4  -1    2.50    0.39
  -4   4  -1    3.08    0.59
  -4  -4   1    3.59    0.69
   4   4   1    3.25    0.79
  -4  -4   1    2.84    0.45
   4   4   1    3.01    0.77
   4   4   1    1.53    2.20
  -4  -4   1    4.17    2.08
   4   4   1    2.56    0.59
   4  -4  -1    3.32    0.52
  -4  -4   1    2.92    1.43
   4  -4  -1    3.11    0.57
  -4   4  -1    1.95    1.24
   4   4   1    0.52    1.32
   4  -4  -1    3.73    0.87
   5   4  -1    1.97    0.81
   5  -4   1    1.13    0.57
  -5  -4  -1    0.95    1.55
   5   4  -1    1.78    0.62
   5   4  -1    2.81    0.75
  -5  -4  -1    0.49    0.90
  -5   4   1    1.75    0.49
   5  -4   1    1.52    0.55
  -5  -4  -1    1.67    0.42
   5   4  -1    0.88    2.22
  -5   4   1    2.49    0.44
  -5  -4  -1    1.92    0.54
   5  -4  -1    1.69    0.70
  -5   4  -1    1.43    0.48
  -5   4  -1    1.74    0.28
   5   4   1    1.37    0.69
  -5  -4   1    1.07    1.57
   5   4   1   -0.41    1.27
  -5   4  -1    0.40    0.79
   5   4   1    1.43    0.56
  -5   4  -1    0.15    1.03
  -5  -4   1    1.87    0.49
   5  -4  -1    0.83    2.26
  -5  -4   1    1.81    0.47
   5   4   1    1.34    0.52
  -6  -4  -1   -0.30    1.46
   6  -4   1    1.50    0.67
  -6  -4  -1    1.59    0.52
  -6   4   1    0.92    0.28
   6   4  -1    1.73    0.85
  -6   4   1    0.49    0.42
  -6  -4  -1    1.36    0.35
   6   4  -1   -0.36    2.59
   6  -4   1    1.95    0.78
  -6  -4  -1   -0.56    0.83
   6   4  -1    2.12    0.80
   6   4  -1    1.01    0.58
   6  -4  -1    1.28    0.67
  -6   4  -1    1.95    0.53
   6   4   1   -0.47    2.46
  -6  -4   1    1.36    0.51
   6  -4  -1   -0.19    2.20
  -6  -4   1    1.53    1.69
   6   4   1    1.78    0.64
  -6  -4   1    1.14    0.42
   6   4   1    0.54    0.48
   6   4   1    0.69    0.60
   6  -4  -1    1.04    0.54
   7   4  -1   -2.81    3.81
   7   4  -1    1.53    0.84
   7  -4   1    0.95    0.61
   7   4  -1    0.55    0.70
   7  -4   1    1.51    0.81
   7  -4  -1    0.36    0.70
   0   5  -1   18.76    0.91
   0  -5   1   19.63    0.96
   0  -5   1   18.90    0.67
   0  -5  -1   18.69    0.94
   0  -5  -1   18.62    1.00
   0  -5  -1   18.59    0.71
   0   5   1   17.99    0.89
   0  -5   1   18.61    0.98
   0   5  -1   17.79    0.65
   0  -5  -1   18.31    0.79
   0   5   1   17.19    0.96
   0  -5   1   21.26    2.72
   0   5  -1   19.78    0.95
   0   5  -1   18.70    0.99
   1  -5   1   20.35    0.87
   1  -5   1   17.83    0.95
  -1  -5  -1   19.70    1.03
   1   5  -1   28.38    4.05
  -1  -5  -1   18.66    1.00
   1   5  -1   17.83    0.97
  -1   5   1   25.71    4.24
   1   5  -1   18.90    0.95
   1   5  -1   20.78    0.83
  -1  -5  -1   19.46    1.07
   1  -5   1   18.06    0.96
  -1   5   1   19.73    0.97
  -1   5   1   17.69    0.99
  -1   5  -1   18.34    0.96
  -1   5  -1   19.30    0.84
  -1  -5   1   19.89    1.04
   1   5   1   18.98    1.03
   1   5   1   18.96    1.02
  -1   5  -1   22.48    2.96
  -1   5  -1   17.85    0.94
  -1   5  -1   18.17    3.57
  -1  -5   1   28.74    4.87
  -1   5  -1   18.54    0.98
  -1  -5   1   18.29    1.02
   1  -5  -1   18.10    1.00
   1  -5  -1   23.67    4.15
   1  -5  -1   19.32    1.00
  -1  -5   1   18.87    1.03
   1   5   1   18.82    0.94
  -1  -5   1   25.86    3.45
   1   5   1   18.60    1.00
   1  -5  -1   18.85    0.83
   1  -5  -1   18.80    2.50
   2   5  -1   10.76    0.89
  -2  -5  -1   11.43    0.79
  -2   5   1   13.24    3.54
  -2   5   1   14.01    2.75
  -2   5   1   12.28    1.07
  -2   5   1   12.23    0.92
   2  -5   1   10.04    0.73
  -2  -5  -1   10.04    0.76
  -2   5   1   10.58    0.80
   2  -5   1   10.30    0.53
  -2  -5  -1    9.22    0.82
   2   5  -1   10.17    0.90
   2  -5   1   11.29    0.94
   2   5  -1   10.80    0.51
   2   5  -1   10.79    0.51
  -2  -5  -1    9.88    0.86
  -2  -5  -1   10.30    0.58
   2   5  -1   10.77    0.83
  -2   5   1    4.07    4.90
  -2   5   1   10.69    0.81
  -2   5  -1   11.11    2.01
  -2  -5   1   19.95    5.18
  -2   5  -1   10.91    0.74
  -2  -5   1   10.78    0.51
  -2  -5   1   17.65    3.17
   2  -5  -1    9.49    0.47
   2   5   1   10.37    0.89
  -2  -5   1   10.34    0.87
   2  -5  -1    3.05    3.90
  -2   5  -1    3.74    5.26
  -2  -5   1    9.15    0.75
  -2   5  -1    8.94    0.84
   2  -5  -1   10.50    0.50
   2   5   1   10.61    0.57
  -2   5  -1    9.36    0.74
   2   5   1    9.40    0.82
   2  -5  -1   10.21    0.94
   2  -5  -1   10.76    0.80
  -2   5  -1   10.57    0.53
  -2  -5   1   10.46    0.89
  -2   5  -1    9.48    0.78
  -3   5   1    5.17    0.43
  -3   5   1    3.65    2.14
  -3   5   1    5.81    0.62
   3   5  -1    6.45    0.95
  -3   5   1    5.98    2.12
  -3  -5  -1    8.89    3.01
  -3   5   1    5.26    0.74
  -3  -5  -1   10.84    4.05
   3   5  -1    6.03    0.94
  -3  -5  -1    6.22    0.63
   3   5  -1   16.19    5.90
   3  -5   1    5.24    0.91
   3   5  -1    5.99    0.55
   3   5  -1    1.57    3.00
   3  -5   1    5.06    0.51
  -3  -5  -1    5.43    0.68
   3  -5   1    4.81    0.55
  -3  -5  -1    5.79    0.57
  -3   5  -1    4.30    0.67
  -3   5  -1    3.98    1.41
  -3   5  -1   11.17    3.64
  -3   5  -1    4.65    0.51
   3  -5  -1    4.97    0.57
   3   5   1    4.50    0.75
   3  -5  -1    5.33    0.94
   3  -5  -1    5.66    0.51
   3   5   1    7.18    4.64
   3   5   1    3.28    2.98
   3   5   1    5.29    0.87
  -3  -5   1    9.57    3.84
   3  -5  -1    2.08    3.44
  -3  -5   1    6.11    0.64
   3  -5  -1    8.61    2.84
  -3  -5   1    4.46    0.49
  -3   5  -1    5.70    0.82
  -3  -5   1    8.87    2.70
  -3  -5   1    5.45    0.67
   4   5  -1   -1.17    2.06
  -4   5   1    0.96    0.34
   4   5  -1    1.11    0.39
  -4   5   1    0.91    0.40
  -4  -5  -1    0.39    1.01
   4   5  -1    1.10    0.49
   4  -5   1    1.89    0.64
   4  -5   1    1.02    0.30
   4  -5   1    1.24    0.41
   4   5  -1    1.48    0.55
  -4   5   1    0.01    0.66
  -4  -5  -1    1.45    0.37
  -4  -5  -1   -1.10    0.91
  -4   5   1    0.86    0.81
  -4   5   1    0.90    0.35
   4   5  -1    1.62    1.64
  -4  -5   1    0.27    0.33
  -4   5  -1    0.82    0.38
  -4  -5   1    0.90    0.94
  -4   5  -1    0.91    0.61
   4   5   1    0.71    0.43
  -4   5  -1    0.58    0.93
  -4   5  -1    0.92    0.24
   4  -5  -1    1.65    0.55
   4  -5  -1    0.83    2.03
  -4  -5   1    0.68    1.07
   4   5   1    0.74    0.49
  -4  -5   1    0.18    0.93
   4   5   1    0.88    0.35
   4  -5  -1    1.11    0.36
  -4   5  -1    0.50    0.21
  -4  -5   1    0.91    0.37
   4   5   1    0.38    1.28
  -5  -5  -1    3.40    0.59
   5  -5   1    5.63    0.94
   5   5  -1    4.47    1.07
   5   5  -1    4.61    1.01
  -5   5   1    5.35    0.85
   5  -5   1    6.59    1.41
  -5   5   1    6.37    0.66
   5  -5   1    4.86    0.47
   5   5  -1    3.94    0.79
  -5  -5  -1    1.56    1.82
  -5  -5  -1    4.57    0.66
  -5  -5  -1    5.55    0.95
   5  -5  -1    5.45    0.82
   5   5   1    4.07    0.71
  -5   5  -1    5.17    0.47
   5   5   1    6.69    1.22
   5  -5  -1    6.06    0.93
  -5   5  -1    5.10    0.86
   5  -5  -1    4.65    1.12
  -5  -5   1    5.66    0.89
  -5  -5   1    6.57    0.74
   5   5   1    5.85    1.23
  -6   5   1   -0.05    0.37
   6   5  -1    0.86    2.37
  -6  -5  -1    0.29    0.41
   6   5  -1   -0.83    0.50
   6  -5   1    0.67    0.51
   6   5  -1   -0.20    0.47
  -6  -5  -1   -0.28    0.31
   6  -5   1    0.28    0.41
  -6   5   1    0.77    0.26
  -6  -5  -1    1.51    1.18
  -6  -5   1   -0.08    0.61
   6   5   1   -0.22    2.45
  -6  -5   1   -2.37    1.42
   6   5   1    0.33    0.67
  -6  -5   1    0.05    0.33
   6  -5  -1    0.34    0.44
   6   5   1    1.57    0.65
   6  -5  -1    0.76    0.54
  -6   5  -1   -0.15    0.38
  -6  -5   1    0.32    0.42
   7   5  -1    3.38    4.73
   7  -5   1    3.36    1.01
   7   5  -1    1.52    0.90
   7  -5   1    4.41    1.24
   7  -5  -1    0.64    0.75
   7   5   1    3.30    1.02
   7   5   1    3.22    1.11
   0   6  -1    6.93    3.08
   0   6   1    7.60    2.91
   0   6   1    1.81    3.41
   0   6   1   10.13    4.02
   1  -6   1   12.40    0.76
   1   6  -1   12.88    0.84
   1   6  -1   11.43    0.85
  -1  -6  -1   11.08    0.85
   1  -6   1   12.50    0.83
  -1  -6  -1   11.64    0.89
  -1   6   1   11.28    0.87
   1  -6   1   11.79    0.87
   1   6  -1   12.29    0.72
  -1  -6  -1   11.80    0.84
  -1   6   1   12.17    0.79
  -1  -6  -1   12.30    0.36
  -1   6  -1   11.75    0.78
  -1   6  -1   12.46    0.88
   1   6   1   11.58    0.85
  -1  -6   1   12.44    0.93
  -1  -6   1   11.39    0.86
   1   6   1   11.40    0.78
   1   6   1   12.90    0.93
  -1  -6   1   12.32    0.98
   1   6   1   12.04    0.85
   1  -6  -1   11.67    0.84
  -1   6  -1   12.47    0.74
  -1   6  -1   12.01    0.86
   1  -6  -1   13.96    1.50
   1  -6  -1   10.92    0.71
   2  -6   1   38.47    1.72
  -2  -6  -1   37.31    1.03
   2   6  -1   39.71    1.77
   2  -6   1   38.24    1.68
  -2  -6  -1   37.61    1.61
  -2   6   1   36.87    1.69
  -2   6   1   37.82    1.60
   2   6  -1   38.33    1.33
   2  -6   1   36.97    1.54
  -2   6   1   38.97    1.66
   2  -6   1   37.47    1.75
  -2  -6  -1   39.07    1.75
   2  -6  -1   38.30    0.96
   2  -6  -1   39.52    1.19
  -2   6  -1   37.88    1.52
   2   6   1   39.30    1.81
  -2   6  -1   37.91    1.18
  -2   6  -1   36.07    1.69
  -2  -6   1   35.98    1.62
   2  -6  -1   37.71    1.78
   2   6   1   37.83    1.69
  -2  -6   1   39.48    1.77
   2  -6  -1   39.61    1.67
  -2   6  -1   37.71    1.64
   3   6  -1   16.08    0.47
   3  -6   1   15.25    0.48
  -3  -6  -1   15.72    1.18
  -3  -6  -1   16.74    1.09
  -3   6   1   16.81    1.09
   3  -6   1   15.37    0.98
   3   6  -1   16.63    1.35
   3  -6   1   15.92    1.31
  -3   6   1   17.60    1.18
   3   6  -1   14.74    0.77
  -3  -6  -1    9.54    3.08
   3  -6   1   16.30    0.90
  -3  -6  -1   15.24    0.86
   3   6  -1   15.04    0.45
  -3  -6  -1   11.97    2.61
   3   6  -1   16.82    1.30
   3   6  -1   16.85    5.02
   3   6   1   15.21    1.29
  -3   6  -1   17.98    1.20
   3  -6  -1   17.06    1.39
  -3   6  -1   10.77    2.62
   3   6   1   16.06    0.58
  -3   6  -1   15.81    1.12
  -3   6  -1   16.39    0.97
   3  -6  -1   12.12    2.96
   3   6   1   15.04    1.25
  -3  -6   1   15.54    1.17
  -3  -6   1   14.46    0.78
   3   6   1   16.06    0.56
   3  -6  -1   16.09    0.83
  -3  -6   1   10.21    2.19
   3  -6  -1   15.57    1.05
   4   6  -1    2.48    0.78
   4  -6   1    1.58    0.37
  -4  -6  -1    0.91    1.18
  -4  -6  -1    1.12    1.69
   4   6  -1    3.60    0.60
  -4   6   1    1.91    1.18
  -4   6   1    2.22    0.57
   4   6  -1    3.08    0.72
   4   6  -1   -0.42    1.47
  -4  -6  -1    2.36    0.62
  -4   6   1    3.33    0.60
   4  -6   1    2.07    0.51
   4  -6   1    3.01    0.76
  -4  -6  -1    2.16    0.45
   4  -6  -1    1.44    0.52
  -4   6  -1    2.86    0.67
   4  -6  -1    0.96    2.16
  -4  -6   1    0.63    0.85
   4  -6  -1    2.53    0.42
  -4  -6   1    0.59    1.31
   4   6   1    2.98    0.75
   4   6   1    0.65    0.96
  -4  -6   1    1.81    0.53
  -4  -6   1    2.66    0.51
   4  -6  -1    2.30    0.49
  -4   6  -1    3.07    0.50
   4   6   1    2.61    0.71
  -5   6   1   13.41    0.96
   5   6  -1   11.28    1.04
   5   6  -1   13.17    1.56
  -5   6   1   12.68    1.15
  -5  -6  -1   14.03    1.26
   5  -6   1   12.21    0.78
   5  -6   1   13.57    1.53
   5  -6   1   12.20    1.14
   5   6  -1   11.36    1.85
   5  -6  -1   15.98    1.70
  -5  -6   1   13.11    1.21
  -5   6  -1   14.41    1.22
  -5  -6   1    7.69    3.31
   5  -6  -1   12.19    0.93
   5   6   1   11.58    1.69
  -5   6  -1   13.21    0.81
   5  -6  -1   13.73    1.05
  -5  -6   1   14.26    1.10
  -6   6   1    4.00    0.84
   6   6  -1   -0.72    2.35
  -6  -6  -1    6.23    0.88
   6   6  -1    4.07    1.05
  -6  -6  -1    0.48    1.88
  -6  -6  -1    3.83    0.80
   6  -6   1    3.76    1.03
   6  -6   1    4.22    0.84
  -6   6   1    3.95    0.59
   6  -6  -1    3.81    1.11
   6  -6  -1    5.27    0.87
   6   6   1    3.30    0.98
  -6  -6   1    5.31    0.83
  -6  -6   1    5.17    0.96
   6   6   1    4.44    1.19
  -6   6  -1    3.94    0.86
   7   6  -1    1.24    4.80
   7  -6   1   -0.10    0.71
   7  -6   1   -0.32    0.58
   7   6  -1    1.35    0.89
   7  -6  -1   -0.66    0.51
   7   6   1   -0.45    0.60
   0   7  -1   25.88    1.29
   0   7   1   25.48    1.26
   0  -7  -1   25.45    1.37
   0   7  -1   25.65    1.37
   0  -7   1   26.59    1.13
   0  -7   1   25.30    1.34
   0  -7  -1   25.30    0.98
   0   7   1   26.38    1.40
   0  -7  -1   26.14    1.10
   0   7  -1   24.83    1.22
   0  -7  -1   27.05    1.32
   0  -7   1   27.61    0.94
   0  -7   1   26.27    1.31
   0   7  -1   25.65    0.89
  -1  -7  -1    0.06    0.22
   1  -7   1   -0.22    2.19
   1   7  -1   -0.09    1.26
  -1  -7  -1    1.05    1.20
  -1   7   1   -0.28    0.14
   1   7  -1   -0.21    0.12
  -1   7   1   -0.23    0.14
   1  -7   1    0.08    0.21
   1  -7   1   -0.15    0.14
   1   7  -1    2.02    2.25
  -1   7   1   -0.10    2.06
  -1   7   1    0.79    1.08
   1   7  -1   -0.02    0.17
  -1  -7  -1   -0.14    0.17
   1  -7   1    0.40    0.24
   1   7  -1    0.02    0.16
  -1   7   1    0.03    0.22
  -1   7   1    1.19    4.81
  -1  -7  -1   -0.01    0.22
  -1  -7  -1   -0.70    1.53
  -1   7  -1    0.06    0.20
  -1   7  -1    1.22    2.04
   1  -7  -1    0.36    0.20
   1   7   1    0.21    0.24
   1   7   1    0.04    1.48
   1  -7  -1    0.19    0.12
   1  -7  -1   -0.01    0.15
  -1   7  -1   -0.06    0.18
  -1  -7   1   -0.16    0.17
   1  -7  -1   -0.13    0.18
  -1  -7   1    0.48    0.24
  -1  -7   1    0.20    0.76
   1  -7  -1    0.72    1.38
  -1   7  -1    0.51    0.94
   1  -7  -1    0.11    0.59
   1   7   1    0.04    0.18
  -1   7  -1   -1.23    3.81
   1   7   1    3.37    3.42
  -1  -7   1   -0.54    1.56
  -1   7  -1   -0.20    0.20
  -1   7  -1    0.12    0.18
   1   7   1    0.23    0.25
  -1  -7   1   -0.25    0.20
   2  -7   1    3.91    0.36
  -2  -7  -1    9.74    4.62
  -2  -7  -1    4.10    0.27
   2  -7   1    4.33    0.69
   2  -7   1   14.49    5.35
  -2  -7  -1    8.40    3.08
  -2  -7  -1    5.26    0.86
  -2   7   1    4.72    0.72
  -2   7   1    3.21    0.61
   2   7  -1    4.32    0.75
   2  -7   1    2.78    0.64
   2   7  -1   10.11    3.42
   2  -7   1    3.22    0.39
   2   7  -1    4.27    0.43
   2   7   1    8.50    3.12
  -2  -7   1    3.96    0.73
   2  -7  -1    4.38    0.69
   2   7   1    3.63    0.43
   2   7   1    2.77    0.58
  -2   7  -1    3.76    2.59
  -2   7  -1    4.22    0.65
   2  -7  -1   14.37    5.08
   2  -7  -1    3.68    0.28
  -2  -7   1   15.68    5.49
   2   7   1    4.27    0.72
  -2  -7   1    7.60    2.78
   2  -7  -1    3.09    0.64
   2  -7  -1    3.49    0.41
  -2   7  -1    3.85    0.67
  -2   7  -1    4.02    0.43
   3   7  -1    0.48    0.15
   3  -7   1    1.05    0.27
   3   7  -1    1.17    0.21
   3  -7   1    1.01    0.21
  -3   7   1    0.72    0.34
  -3  -7  -1    0.39    0.22
  -3  -7  -1    0.86    0.50
   3   7  -1    1.44    1.26
   3  -7   1   -0.05    1.21
  -3   7   1    0.53    0.93
   3  -7   1    0.76    0.31
   3   7  -1    0.48    0.36
  -3  -7  -1    1.08    1.08
  -3  -7  -1    0.38    1.43
  -3   7   1    0.86    0.42
   3  -7   1    0.52    0.40
   3   7  -1    0.83    0.79
   3   7   1    0.87    0.23
   3  -7  -1    2.05    1.56
   3   7   1    0.40    0.27
   3  -7  -1    0.79    0.22
  -3  -7   1    0.78    0.92
   3   7   1    1.30    1.02
  -3   7  -1    1.09    0.38
  -3  -7   1    1.62    1.57
  -3  -7   1    0.73    0.38
   3   7   1    0.74    0.44
  -3   7  -1    1.16    0.36
   3  -7  -1    0.08    0.27
   3   7   1    0.87    0.22
   3   7   1    0.62    0.80
   3  -7  -1    1.06    0.48
   3  -7  -1    0.81    0.15
  -3   7  -1    1.58    1.04
   4  -7   1    6.48    1.20
  -4   7   1    6.07    0.72
  -4  -7  -1    4.63    0.66
   4   7  -1    4.00    0.86
   4  -7   1    6.55    0.74
   4  -7   1    6.18    0.68
  -4  -7  -1    3.74    2.06
  -4  -7  -1    2.64    1.71
   4   7  -1    5.33    1.03
  -4   7   1    5.01    0.85
  -4  -7  -1    5.75    0.99
  -4  -7   1    6.76    0.73
  -4   7  -1    2.36    1.51
   4   7   1    5.20    1.03
   4  -7  -1    4.54    0.54
   4   7   1    6.48    1.17
  -4   7  -1    6.89    0.69
  -4  -7   1    2.54    2.10
  -4  -7   1    5.15    0.93
  -4  -7   1    2.33    1.40
   4  -7  -1    5.87    1.10
  -4   7  -1    4.02    0.81
  -5  -7  -1    2.69    1.52
   5  -7   1    2.35    0.55
   5  -7   1    2.10    0.77
  -5   7   1    1.36    0.45
  -5  -7  -1    2.47    0.71
   5   7  -1    3.63    1.11
  -5   7   1    2.12    1.28
   5  -7   1    3.10    0.68
   5   7  -1   -0.73    1.56
  -5  -7  -1    2.97    2.38
  -5   7   1    2.16    0.64
  -5  -7   1    1.82    1.02
   5  -7  -1    1.86    0.71
   5   7   1    2.39    0.83
   5  -7  -1    2.91    0.57
  -5   7  -1    1.19    1.44
  -5   7  -1    3.26    0.53
  -5  -7   1    2.61    2.34
   5   7   1    0.98    1.80
   5   7   1    3.24    0.91
  -5   7  -1    3.07    0.76
  -5  -7   1    1.90    0.64
   6   7  -1    0.27    0.51
   6  -7   1   -0.10    0.50
   6   7  -1    3.82    3.56
   6  -7   1    0.58    0.49
  -6  -7  -1    2.09    2.01
  -6  -7  -1    1.74    0.66
  -6  -7  -1    0.15    0.42
  -6  -7  -1    0.42    1.02
  -6   7   1    0.61    0.46
  -6  -7   1    0.10    0.79
   6   7   1    1.24    0.69
  -6   7  -1    0.39    0.46
   6  -7  -1    1.10    0.52
  -6  -7   1    0.39    0.50
   6   7   1    2.29    0.74
  -6  -7   1    0.28    0.35
   6  -7  -1    0.10    0.47
  -6  -7   1   -0.92    2.26
   7   7  -1   -0.08    0.68
  -7  -7  -1    0.06    0.53
   7   7   1    0.14    0.86
  -7  -7   1   -1.43    0.56
   0  -8  -1    5.98    0.67
   0   8  -1    4.78    0.60
   0  -8   1    5.80    0.67
   0   8  -1    5.51    0.43
   0   8  -1    5.10    0.82
   0   8   1    5.18    0.61
   0  -8  -1    5.04    0.49
   0   8  -1    4.63    0.69
   0   8   1    5.87    0.86
   0  -8   1    5.10    0.44
   0  -8  -1    5.17    0.52
   0  -8   1    4.82    0.52
  -1   8   1    9.32    0.85
  -1   8   1    7.89    0.77
  -1   8   1    8.28    0.84
  -1  -8  -1   23.19    6.45
   1   8  -1    9.64    0.82
   1   8  -1    8.17    0.71
  -1   8   1   10.14    4.59
  -1  -8  -1    9.00    0.80
   1  -8   1    9.15    0.78
   1  -8   1    8.16    0.75
  -1  -8  -1    9.43    0.92
  -1  -8  -1   19.23    4.99
   1  -8  -1    9.46    0.80
   1   8   1    9.46    0.76
   1   8   1    9.55    0.92
  -1   8  -1    9.10    0.73
   1   8   1    8.69    0.79
  -1   8  -1    7.92    0.79
   1  -8  -1    8.70    0.54
   1  -8  -1   14.85    2.80
  -1   8  -1    9.30    0.87
  -1  -8   1    7.63    0.83
   1  -8  -1    8.74    0.75
  -1  -8   1    8.90    0.83
  -1   8  -1    8.56    0.73
  -2   8   1    5.47    2.27
  -2   8   1    5.71    0.86
  -2  -8  -1   10.30    3.07
   2   8  -1    4.36    0.49
   2   8  -1    6.34    0.92
   2   8  -1    7.07    1.59
  -2  -8  -1    7.17    3.39
  -2  -8  -1    5.92    0.76
   2  -8   1    9.24    3.54
   2  -8   1    5.45    0.85
   2  -8   1    5.51    0.43
  -2   8   1    5.75    0.85
   2   8  -1   11.00    3.16
   2  -8   1    5.15    0.54
   2  -8  -1    5.56    0.56
  -2  -8   1    6.38    2.97
   2  -8  -1    5.85    0.91
  -2  -8   1    6.10    0.97
  -2   8  -1    5.70    0.53
  -2   8  -1    7.08    0.77
  -2   8  -1    5.73    2.30
  -2   8  -1    5.26    0.82
   2   8   1   12.24    3.54
   2  -8  -1   10.25    3.37
   2   8   1    4.19    0.72
   2   8   1    4.62    0.50
   2   8   1    7.57    1.40
  -2  -8   1    7.18    2.35
   2  -8  -1    5.53    0.34
   3   8  -1    2.63    0.37
   3  -8   1    3.35    0.77
  -3  -8  -1    3.57    0.77
   3   8  -1    0.61    1.22
   3  -8   1    3.09    0.45
   3   8  -1    3.27    0.74
   3  -8   1    1.27    1.45
  -3   8   1    3.78    0.73
  -3  -8  -1    1.87    1.93
  -3   8   1    3.41    0.66
   3   8  -1    3.02    0.40
   3  -8   1    3.21    0.35
  -3  -8  -1    3.60    0.37
   3  -8  -1    0.72    1.13
   3  -8  -1    2.80    0.57
   3   8   1    3.27    0.45
   3   8   1    2.77    0.67
   3  -8  -1    3.04    0.30
  -3  -8   1    4.13    0.80
  -3   8  -1    0.78    1.16
   3   8   1    3.20    0.77
  -3   8  -1    2.83    0.66
  -3   8  -1    3.36    0.66
   3  -8  -1    3.52    0.79
   3   8   1    3.19    0.36
   4  -8   1    8.68    0.79
  -4  -8  -1    6.02    3.09
  -4  -8  -1   10.24    1.18
  -4   8   1   12.34    1.05
  -4  -8  -1    5.62    2.33
   4   8  -1   12.36    1.39
  -4   8   1   11.38    1.15
  -4  -8  -1    9.30    0.76
   4  -8   1   12.27    1.37
   4  -8  -1    8.57    1.36
  -4   8  -1   10.29    1.09
   4   8   1   10.60    1.28
   4   8   1    9.77    1.47
  -4  -8   1    9.67    1.16
   4  -8  -1   11.18    0.71
  -4  -8   1    5.56    3.01
  -4   8  -1    9.35    0.88
  -5  -8  -1    1.03    1.75
   5   8  -1    5.43    1.22
  -5  -8  -1    5.42    1.08
   5  -8   1    4.52    0.78
  -5   8   1    4.84    0.80
  -5   8   1    5.38    1.00
   5  -8   1    3.51    0.94
  -5  -8   1    3.41    1.87
  -5   8  -1    0.44    2.33
   5   8   1    4.39    1.11
   5  -8  -1    5.33    0.70
   5   8   1    5.44    1.26
  -5   8  -1    4.38    0.92
  -5   8  -1    5.41    0.80
   5  -8  -1    4.91    1.18
  -5  -8   1    7.06    0.88
   6   8  -1   -0.25    3.09
  -6  -8  -1    0.59    0.55
  -6  -8  -1    1.77    1.36
   6  -8   1   -0.40    0.41
   6   8  -1    1.44    0.78
  -6  -8  -1    1.66    2.29
   6  -8   1    0.44    0.49
  -6  -8  -1    0.52    0.49
   6   8   1   -0.59    2.89
  -6  -8   1    1.39    0.63
  -6   8  -1    2.15    0.82
  -6  -8   1    0.28    0.46
  -6  -8   1   -0.25    2.23
   6   8   1    0.65    0.70
   6  -8  -1    0.99    0.73
  -6  -8   1    0.04    0.75
  -7  -8  -1    0.44    0.57
  -7  -8   1    0.19    0.59
   0  -9   1   25.02    3.84
   0  -9  -1   21.04    1.12
   0  -9  -1   37.47    7.05
   0   9  -1   20.53    1.62
   0  -9  -1   28.20    5.07
   0  -9   1   21.96    1.16
   0   9   1   20.77    1.29
   0  -9  -1   21.65    0.98
   0   9  -1   21.73    1.29
   0  -9   1   23.20    1.00
   0  -9   1   38.48    7.62
   0   9   1   20.77    1.98
   0  -9  -1   21.70    1.33
   0  -9   1   20.29    1.32
  -1  -9  -1   15.35    5.93
   1  -9   1   14.67    0.99
   1   9  -1   15.50    1.08
  -1  -9  -1   15.87    1.24
   1  -9   1   15.99    1.09
  -1   9   1   14.40    0.94
  -1   9   1   16.42    1.19
  -1   9   1   17.19    1.50
   1   9  -1   15.68    1.03
  -1  -9  -1   16.20    5.00
   1  -9  -1   15.61    0.77
  -1  -9   1   15.75    1.23
  -1   9  -1   14.35    1.00
  -1   9  -1   14.88    1.17
   1  -9  -1   15.30    1.06
  -1   9  -1   14.59    0.96
   1  -9  -1   25.60    7.50
   1  -9  -1   14.55    1.03
   1   9   1   14.32    1.20
  -1  -9   1   15.41    4.47
   1   9   1   15.36    1.03
  -1  -9   1   22.54    7.14
  -1   9  -1   14.69    1.15
   1  -9  -1   11.15    3.09
   2  -9   1    2.24    0.35
   2  -9   1    2.80    2.54
   2   9  -1    2.38    0.48
   2  -9   1    2.46    0.47
   2   9  -1    5.30    2.37
  -2  -9  -1    4.40    2.56
  -2   9   1    2.21    0.61
   2  -9   1    2.80    0.67
  -2   9   1    2.02    0.82
  -2  -9  -1    2.93    0.72
   2   9  -1    1.74    0.52
  -2   9  -1    2.00    0.43
   2  -9  -1    2.99    0.54
   2   9   1    2.55    0.65
   2  -9  -1    1.68    0.24
  -2   9  -1    2.01    0.57
   2   9   1    4.21    2.25
  -2  -9   1    2.36    1.80
   2  -9  -1    2.12    0.62
   2  -9  -1    2.26    0.23
  -2  -9   1    1.98    0.59
   2   9   1    2.16    0.47
   2  -9  -1    2.96    2.28
  -2   9  -1    1.28    0.53
  -3   9   1   14.05    1.23
   3  -9   1   11.91    0.74
   3   9  -1    9.56    2.71
   3   9  -1   12.18    2.77
  -3  -9  -1   11.36    1.19
   3   9  -1   13.54    0.76
  -3  -9  -1    9.08    3.93
  -3  -9  -1    7.21    2.72
   3  -9   1   11.98    4.05
   3   9  -1   13.51    1.31
   3  -9   1   13.65    1.30
   3  -9   1   11.85    0.72
   3   9  -1    8.17    2.46
  -3   9   1   11.61    1.07
  -3   9  -1   13.43    1.11
  -3   9  -1   12.28    1.17
   3  -9  -1   11.36    3.84
  -3  -9   1   13.56    1.32
   3  -9  -1   12.10    0.72
   3  -9  -1   12.61    0.51
   3   9   1   10.95    2.92
   3   9   1   11.51    1.27
   3  -9  -1   13.46    1.33
   3   9   1   12.05    1.23
   3   9   1   12.19    0.80
   3   9   1   11.72    0.73
  -4  -9  -1    0.43    1.55
  -4  -9  -1    4.23    0.95
   4  -9   1    2.05    0.68
   4   9  -1    1.03    1.73
  -4   9   1    3.12    0.70
   4  -9   1    2.34    0.45
   4   9  -1    2.49    0.76
  -4   9   1    2.75    1.73
  -4   9   1    1.27    0.52
  -4  -9  -1    2.15    1.58
   4   9   1    0.58    1.20
  -4  -9   1    1.60    1.73
  -4   9  -1    3.30    0.77
   4   9   1    1.99    0.75
  -4  -9   1    2.08    1.40
   4  -9  -1    2.59    0.46
  -4   9  -1    3.60    0.73
   4  -9  -1    1.05    1.67
  -4  -9   1    1.80    0.66
   4  -9  -1    1.79    0.59
   4   9   1    2.59    0.72
   5  -9   1    5.97    0.80
   5   9  -1    6.49    1.40
  -5   9   1    5.19    0.86
   5  -9   1    5.92    1.24
  -5   9   1    5.74    1.02
   5  -9  -1    7.36    1.46
   5  -9  -1    6.17    0.53
  -5  -9   1    6.40    1.63
   5   9   1    5.37    1.13
  -5   9  -1    5.64    0.83
  -5   9  -1    6.64    1.09
  -5  -9   1    2.64    2.67
  -6   9   1    1.13    0.63
  -6  -9  -1   -0.01    0.47
   6   9  -1    0.80    3.27
  -6  -9  -1   -1.30    2.09
  -6  -9  -1    1.30    1.40
  -6  -9   1    0.76    1.05
   6   9   1    0.54    0.80
  -6  -9   1    0.12    0.49
  -6   9  -1   -0.49    0.46
  -6  -9   1   -0.20    0.47
  -6  -9   1   -2.51    2.34
  -7  -9  -1   -0.46    0.66
  -7   9  -1   -0.60    0.61
  -7  -9   1    1.71    0.76
   0 -10  -1   30.54    1.43
   0 -10  -1   31.76    1.23
   0  10   1   31.25    1.67
   0 -10  -1   34.15    1.78
   0 -10   1   31.20    1.11
   0 -10   1   34.38    1.81
   0 -10   1   26.03    5.02
   0  10  -1   30.43    1.64
   0 -10  -1   26.12    4.76
   0  10  -1   32.22    1.83
   0 -10   1   31.51    1.48
   0  10   1   29.76    1.80
  -1 -10  -1    0.30    0.36
   1 -10   1    0.31    0.34
   1  10  -1    0.10    0.26
  -1 -10  -1    0.39    1.38
   1 -10   1    0.40    0.21
   1 -10   1    0.21    1.43
  -1  10   1   -0.04    0.24
   1  10  -1    0.88    0.38
  -1 -10  -1    0.01    0.86
   1 -10   1    0.00    0.25
  -1  10   1    0.32    0.34
   1  10   1    0.52    0.30
  -1 -10   1    0.08    0.70
   1 -10  -1    0.07    0.50
  -1 -10   1    0.15    0.27
   1 -10  -1   -0.01    0.17
   1 -10  -1    0.17    0.26
  -1  10  -1    0.59    0.26
   1  10   1    0.47    0.36
  -1  10  -1    0.44    0.38
   1 -10  -1    0.76    1.37
  -1  10  -1    0.17    0.29
   1  10   1   -0.16    0.23
  -1 -10   1    1.49    1.51
   1 -10  -1    0.23    0.27
   2 -10   1    3.66    0.75
   2  10  -1    4.25    0.68
  -2 -10  -1    2.21    2.18
  -2 -10  -1    4.11    0.85
  -2  10   1    4.96    0.89
   2 -10   1    3.78    0.40
  -2  10   1    5.09    0.91
   2 -10   1    4.02    2.93
  -2 -10  -1    1.30    1.50
   2  10  -1    3.92    0.79
   2 -10   1    4.40    0.72
  -2  10  -1    4.23    0.65
   2  10   1    4.74    0.70
   2  10   1    3.19    0.73
  -2  10  -1    3.99    0.83
  -2 -10   1    1.82    1.41
   2 -10  -1    4.36    0.70
  -2 -10   1    4.57    0.93
   2 -10  -1    3.61    0.83
   2 -10  -1    3.81    0.29
  -2 -10   1    2.39    2.23
  -2  10  -1    4.91    0.85
   2 -10  -1    3.93    0.35
   3 -10   1    1.91    0.70
   3 -10   1    1.44    0.41
  -3  10   1    1.29    0.58
   3  10  -1    1.08    1.47
   3 -10   1    1.94    0.36
  -3 -10  -1    1.02    1.39
  -3 -10  -1    1.85    0.70
   3 -10   1    0.87    2.10
  -3 -10  -1   -0.10    1.58
   3  10  -1    1.63    0.37
  -3  10   1    2.02    0.59
   3  10  -1    0.47    0.44
   3  10  -1   -0.05    1.10
  -3 -10   1    1.58    0.64
   3  10   1    1.64    1.32
  -3  10  -1    1.75    0.60
   3  10   1    1.46    0.55
  -3 -10   1    0.05    0.89
   3 -10  -1    1.24    0.35
   3  10   1    2.03    0.42
   3  10   1    1.20    0.36
   3 -10  -1    0.43    1.80
  -3  10  -1    2.20    0.61
  -3 -10   1    0.14    1.63
   3 -10  -1    0.58    0.52
  -4 -10  -1    0.48    1.47
   4  10  -1    0.24    1.71
   4 -10   1    0.85    0.69
  -4 -10  -1    0.15    1.07
  -4 -10  -1    0.44    0.59
   4  10  -1    1.10    0.58
   4 -10   1    0.61    0.29
  -4  10   1    1.38    0.59
   4  10   1    0.48    0.50
  -4 -10   1   -0.52    1.75
   4 -10  -1    0.89    0.46
  -4  10  -1    1.00    0.48
   4  10   1    0.98    0.23
   4 -10  -1   -0.67    1.64
  -4 -10   1    0.94    0.53
  -4  10  -1   -0.45    0.30
  -4 -10   1    0.66    1.12
   4  10   1    1.00    1.38
   4  10   1    0.71    0.23
   5 -10   1    0.23    0.38
  -5 -10  -1    1.40    2.38
  -5 -10  -1    0.01    1.60
   5 -10   1    0.04    0.41
  -5  10   1   -0.75    0.43
   5  10  -1    0.49    1.82
  -5 -10  -1    0.61    0.50
   5  10  -1   -0.28    0.45
  -5  10   1    0.01    0.50
  -5 -10   1   -0.51    1.24
   5  10   1   -0.93    2.05
  -5 -10   1    2.12    2.76
  -5  10  -1   -0.11    0.46
   5  10   1    0.44    0.51
  -5 -10   1    0.75    0.49
  -5  10  -1    0.04    0.36
   5 -10  -1   -0.03    0.50
  -6 -10  -1   -2.03    2.28
  -6 -10  -1    0.14    1.60
   6  10  -1    1.77    0.89
  -6 -10  -1    2.79    0.89
   6 -10   1    3.02    1.03
  -6  10   1    1.57    0.71
   6 -10  -1    0.98    0.77
  -6  10  -1    1.88    0.72
  -6 -10   1    0.38    0.60
   6  10   1    3.48    1.11
  -7 -10  -1    2.03    1.22
  -7  10   1    4.44    1.10
  -7  10  -1    3.12    1.01
   0  11  -1    0.84    0.46
   0 -11  -1    0.36    0.29
   0  11   1    0.52    0.38
   0 -11   1    1.30    1.86
   0 -11  -1    0.48    0.20
   0 -11   1    0.43    0.20
   0 -11  -1    0.01    0.75
   0  11   1    0.50    0.42
   0 -11  -1    0.38    0.34
   0  11  -1    0.17    0.24
   0 -11   1    0.87    0.42
   0 -11  -1    1.55    1.88
   0 -11   1    0.23    0.76
  -1  11   1   10.20    1.17
   1 -11   1   10.26    1.02
   1 -11   1    9.70    0.89
  -1 -11  -1    6.97    3.49
   1  11  -1   11.38    1.04
  -1 -11  -1   12.96    1.28
   1 -11   1    6.02    3.42
   1 -11   1   10.08    0.88
  -1  11   1    9.63    1.04
   1  11  -1    9.05    0.93
  -1 -11   1    9.62    1.15
   1 -11  -1   11.79    1.00
   1 -11  -1    9.30    3.81
   1 -11  -1   10.58    1.01
  -1  11  -1    8.99    0.80
  -1  11  -1   12.18    1.24
   1  11   1   10.43    0.99
   1  11   1   10.12    0.98
  -1  11  -1   10.88    1.13
   1  11   1   10.90    1.17
   1 -11  -1   10.49    0.74
   2  11  -1   31.36    1.90
   2 -11   1   31.67    1.13
   2 -11   1   31.98    1.84
  -2  11   1   33.07    1.98
   2 -11   1   20.94    6.31
   2 -11   1   32.15    1.63
   2  11  -1   30.04    1.54
  -2  11   1   34.49    2.01
  -2 -11  -1   34.11    2.13
  -2  11  -1   33.66    2.04
  -2  11  -1   31.96    1.93
   2  11   1   31.94    1.93
   2 -11  -1   35.12    1.70
   2 -11  -1   32.36    0.93
  -2 -11   1   32.30    2.07
   2  11   1   32.78    1.60
   2 -11  -1   31.39    0.99
   2 -11  -1   22.75    6.33
   2 -11  -1   34.18    1.92
  -3 -11  -1    6.07    2.64
   3 -11   1    9.85    0.86
  -3  11   1   11.31    1.28
   3 -11   1   10.71    1.24
   3  11  -1   11.07    3.13
   3  11  -1   10.94    0.87
   3  11  -1    7.90    2.73
  -3 -11  -1    9.49    1.44
  -3  11   1   10.63    1.15
   3  11  -1   10.52    1.25
   3 -11   1    9.76    0.64
   3 -11   1   11.09    4.49
   3 -11  -1    8.50    3.89
   3 -11  -1   10.36    1.47
  -3  11  -1   10.66    1.12
  -3 -11   1   11.33    1.34
   3  11   1   10.23    0.83
   3  11   1   10.51    3.21
   3  11   1    9.56    2.90
   3  11   1    9.53    0.86
  -3  11  -1    9.97    1.15
   3 -11  -1   10.70    0.84
   3  11   1    8.52    1.30
  -3 -11   1    8.18    4.15
  -4  11   1    1.51    0.47
   4  11  -1    0.43    1.76
   4  11  -1    0.85    0.34
   4 -11   1    1.79    0.67
  -4 -11  -1    1.59    0.71
   4  11  -1    0.61    0.35
   4 -11   1    1.34    0.26
  -4 -11  -1    0.99    1.84
   4 -11   1    1.26    0.34
   4  11  -1    1.01    0.58
  -4  11   1    0.66    0.50
  -4 -11  -1    1.83    1.36
  -4  11  -1    2.25    0.66
  -4  11  -1    0.62    0.44
   4  11   1    1.17    0.30
   4 -11  -1    1.35    0.57
  -4 -11   1    0.60    0.95
   4 -11  -1   -0.40    2.18
  -4 -11   1    2.01    0.73
   4  11   1   -1.41    1.42
  -4 -11   1   -0.35    1.99
   4  11   1    2.01    0.31
   4  11   1    1.22    0.63
   5  11  -1    0.43    2.36
  -5  11   1    1.54    0.65
   5  11  -1    0.90    0.64
  -5 -11  -1    1.00    0.68
  -5  11   1    0.73    0.53
  -5 -11  -1   -0.26    1.29
  -5 -11  -1    0.37    2.31
   5 -11   1    1.12    0.67
  -5 -11   1    1.48    0.72
  -5  11  -1    2.83    0.87
   5  11   1    2.71    0.80
  -5  11  -1    1.94    0.52
  -5 -11   1   -0.78    2.73
   5 -11  -1    2.26    0.87
  -5 -11   1    0.66    1.18
   6  11  -1    3.89    1.29
  -6 -11  -1    1.78    2.83
   6 -11   1    2.95    0.99
  -6 -11  -1    2.67    0.91
  -6  11   1    2.36    0.81
   6  11   1    4.22    1.25
  -6 -11   1    1.41    0.81
   6 -11  -1    2.77    1.13
  -6 -11   1    0.67    3.60
  -6 -11   1   -0.75    1.39
  -6  11  -1    1.96    0.81
  -7  11   1    2.02    0.92
  -7 -11  -1    2.69    0.95
  -7 -11   1    5.15    1.36
  -7  11  -1    3.25    1.03
   0  12   1   21.28    1.65
   0 -12  -1   21.45    1.04
   0 -12   1   22.13    1.63
   0  12   1   22.32    1.59
   0 -12  -1   20.60    1.59
   0  12  -1   25.59    1.84
   0  12  -1   18.73    1.46
   0 -12   1   19.59    6.28
   0 -12  -1   17.98    5.63
  -1 -12  -1   18.18    1.55
   1 -12   1   19.04    1.11
   1 -12   1   17.81    1.18
   1 -12   1   18.78    1.42
  -1  12   1   17.45    1.45
   1  12  -1   17.29    1.31
   1  12  -1   17.14    1.31
   1 -12   1   19.60    6.28
  -1 -12  -1   10.21    3.18
  -1  12   1   16.13    1.46
  -1 -12  -1   11.41    4.56
  -1  12  -1   18.62    1.50
   1 -12  -1   16.01    0.97
   1  12   1   17.14    1.56
  -1  12  -1   14.94    1.20
  -1 -12   1   16.83    5.66
   1 -12  -1   17.67    1.22
  -1 -12   1   16.02    1.47
   1 -12  -1   16.00    5.44
   1 -12  -1   18.69    1.43
  -1  12  -1   20.38    1.61
   1  12   1   15.56    1.29
   1  12   1   14.17    1.24
  -2 -12  -1    3.63    2.70
   2  12  -1    3.35    0.83
   2 -12   1    3.84    0.77
   2 -12   1   10.88    4.87
   2 -12   1    4.69    0.83
  -2 -12  -1    3.39    2.38
  -2  12   1    3.18    0.83
   2 -12   1    3.74    0.52
   2  12  -1    3.60    0.69
  -2  12   1    4.59    0.96
  -2 -12  -1    3.43    0.85
   2 -12  -1    6.23    3.87
   2 -12  -1    4.60    0.89
  -2 -12   1    4.37    0.98
  -2 -12   1    4.10    2.24
   2  12   1    3.12    0.67
  -2  12  -1    2.32    0.65
  -2 -12   1    5.93    3.27
   2  12   1    1.65    0.57
   2 -12  -1    3.10    0.36
   2 -12  -1    4.02    0.84
   2 -12  -1    2.71    0.30
  -2  12  -1    3.50    0.87
   3 -12   1    9.56    0.88
  -3 -12  -1    3.90    2.96
  -3 -12  -1    8.61    1.63
   3  12  -1    6.84    2.73
   3 -12   1    7.62    0.55
  -3  12   1   10.40    1.24
   3 -12   1    6.10    3.62
   3 -12   1    6.74    1.16
   3  12  -1    9.64    0.86
   3 -12  -1    9.21    0.84
  -3 -12   1    4.34    3.35
  -3  12  -1    6.47    1.94
   3 -12  -1    7.15    1.20
  -3 -12   1    7.11    1.63
  -3  12  -1    9.37    1.35
  -3 -12   1    4.36    2.07
   3 -12  -1    5.55    3.45
   3  12   1    8.97    0.85
   3  12   1    8.29    2.66
   3  12   1    9.14    1.46
  -4  12   1    5.01    1.04
   4  12  -1    4.00    1.07
   4 -12   1    3.49    0.90
  -4 -12  -1    1.13    1.54
  -4 -12  -1    3.89    1.08
   4  12  -1    5.12    0.47
   4  12  -1    1.46    2.15
   4  12  -1    3.78    1.94
   4 -12   1    1.07    2.14
  -4  12   1    4.10    0.94
   4 -12   1    4.47    0.49
  -4 -12   1    4.87    1.12
   4 -12  -1    3.91    2.96
  -4  12  -1    4.30    0.88
   4  12   1    5.39    1.25
   4  12   1    0.74    1.82
  -4 -12   1    0.96    3.92
   4  12   1    4.43    0.52
  -4 -12   1    1.73    1.47
   4  12   1    1.95    1.23
   4 -12  -1    5.12    1.11
  -4  12  -1    5.62    1.20
  -5  12   1    0.41    0.52
  -5 -12  -1   -0.47    0.55
   5  12  -1    0.08    0.62
  -5 -12  -1    0.17    2.63
   5 -12   1    1.54    0.63
  -5  12   1    0.60    0.63
  -5 -12   1   -0.21    0.60
   5  12   1    1.46    0.68
   5 -12  -1    0.68    0.54
  -5  12  -1    0.42    0.46
  -5 -12   1   -0.23    2.79
  -5  12  -1   -0.55    0.48
  -6 -12  -1    4.36    1.19
  -6 -12  -1    2.45    3.30
  -6 -12  -1    0.03    1.69
  -6 -12   1   -0.13    1.44
  -6 -12   1    3.68    1.10
  -6 -12   1    0.63    3.76
  -6  12  -1    4.75    1.36
   0  13  -1    6.72    1.09
   0 -13   1    1.67    2.83
   0  13  -1    6.45    1.18
   0  13   1    6.83    1.19
   0 -13  -1    6.46    1.13
   0 -13  -1    2.59    2.88
   0 -13   1    6.38    1.11
   0 -13  -1    6.61    0.58
   0  13   1    7.18    1.14
   1  13  -1   26.46    1.74
  -1  13   1   27.21    1.98
   1 -13   1   26.83    1.79
   1 -13   1   24.16    7.27
  -1  13   1   28.41    1.92
   1 -13   1   27.72    1.48
  -1 -13  -1   16.35    5.41
   1 -13   1   27.82    1.41
   1  13  -1   28.43    1.76
  -1 -13  -1   26.55    1.93
   1 -13  -1   30.11    1.59
  -1  13  -1   26.88    1.94
  -1  13  -1   24.09    1.82
   1 -13  -1   18.66    6.12
   1  13   1   26.59    1.73
  -1 -13   1   17.81    5.96
   1  13   1   29.14    1.77
   1  13   1   28.39    2.03
  -1 -13   1   29.46    2.04
   1 -13  -1   29.43    1.43
   1 -13  -1   28.40    1.81
   2  13  -1   12.48    1.14
  -2  13   1   15.69    1.51
   2  13  -1   15.09    1.39
   2 -13   1   14.14    1.30
  -2  13   1   11.43    2.18
   2 -13   1   13.50    0.88
   2 -13   1   14.39    5.95
  -2 -13  -1   13.72    2.59
  -2 -13  -1    9.58    3.25
  -2 -13  -1   12.22    4.78
   2 -13   1   14.02    1.25
  -2  13  -1   15.24    2.56
   2  13   1   12.60    1.34
   2 -13  -1   15.14    1.23
  -2 -13   1   13.95    5.19
   2  13   1   13.25    1.22
  -2 -13   1   16.37    2.85
   2 -13  -1   17.79    6.46
   2 -13  -1   13.51    0.70
   2 -13  -1   13.16    1.27
  -2  13  -1   13.56    1.39
   3 -13   1    6.68    0.59
  -3 -13  -1    2.47    2.93
   3  13  -1    7.66    1.36
   3  13  -1    6.75    0.80
   3  13  -1   10.33    3.34
  -3  13   1    7.59    1.24
   3 -13   1    6.57    1.19
  -3 -13  -1    7.01    1.33
   3 -13   1    6.70    0.83
  -3  13   1    6.70    1.19
   3 -13   1    3.41    3.62
   3  13   1    8.01    0.86
   3 -13  -1    6.76    0.82
  -3  13  -1    6.48    1.16
   3  13   1    7.37    2.75
   3  13   1    6.79    1.32
   3 -13  -1    7.53    1.24
  -3  13  -1    6.27    1.18
  -3 -13   1    6.27    1.28
  -3 -13   1    2.43    3.21
   3 -13  -1    3.41    3.17
   4  13  -1    1.89    0.44
   4  13  -1    1.52    1.68
  -4 -13  -1    2.31    0.84
  -4 -13  -1    1.06    1.94
  -4  13   1    1.99    0.71
   4 -13   1    2.04    0.70
   4 -13   1    1.77    0.42
   4  13  -1    2.61    0.87
   4 -13   1    2.22    2.78
   4  13  -1   -0.24    2.37
  -4  13   1    1.76    0.64
  -4 -13  -1   -0.57    1.43
  -4 -13   1    1.10    2.76
   4  13   1    0.49    1.66
  -4  13  -1    0.88    0.51
  -4 -13   1    1.49    0.71
  -4  13  -1    2.09    0.67
   4  13   1    1.92    0.74
   4  13   1    0.28    2.00
   4 -13  -1    1.30    0.37
   4 -13  -1   -0.37    2.78
   4  13   1    1.21    0.44
   4 -13  -1    2.69    0.98
  -4 -13   1   -0.49    1.07
   5  13  -1    9.06    1.74
  -5  13   1    4.45    1.16
   5 -13   1    7.95    1.45
  -5 -13  -1    1.99    3.00
  -5  13   1    7.58    1.96
  -5 -13  -1    5.79    1.31
   5 -13  -1    7.00    1.36
   5  13   1    6.01    1.31
  -5 -13   1    6.07    1.39
  -5  13  -1    5.24    1.16
  -5  13  -1    7.15    1.18
  -6 -13  -1    1.09    0.86
  -6 -13  -1    1.69    1.91
  -6 -13  -1   -4.91    3.67
  -6  13   1    0.29    0.71
  -6 -13   1   -2.76    3.47
  -6 -13   1    2.64    0.98
  -6 -13   1    0.97    1.50
  -6  13  -1   -0.95    0.56
   0  14  -1   -0.23    0.25
   0  14  -1   -0.30    0.30
   0 -14  -1   -0.09    2.43
   0  14   1   -0.48    0.30
   0 -14   1    0.24    0.80
   0 -14   1    0.41    0.42
   0 -14  -1    0.89    1.03
   0 -14   1    1.03    2.32
   0 -14  -1    0.50    0.52
   0  14   1   -0.09    0.37
   0 -14  -1    0.71    0.28
  -1  14   1   13.07    1.55
   1 -14   1   10.50    0.94
  -1 -14  -1    8.59    1.60
   1 -14   1   11.31    1.27
   1  14  -1   11.35    1.20
   1  14  -1    9.14    1.09
   1 -14   1   11.26    5.22
  -1 -14   1   11.78    1.84
   1 -14  -1   12.05    0.94
   1 -14  -1    8.50    4.43
   1  14   1   12.02    1.23
   1  14   1   13.81    1.53
   1  14   1   10.70    1.15
  -1  14  -1   10.67    1.25
   1 -14  -1   10.50    1.22
   1 -14  -1   11.56    1.03
   2 -14   1    2.17    3.08
  -2 -14  -1    1.04    1.51
   2  14  -1    0.81    0.50
   2 -14   1    0.76    0.61
  -2 -14  -1    0.09    2.10
  -2 -14  -1    1.42    0.61
   2  14  -1    2.16    0.71
  -2  14   1    1.31    0.70
   2 -14   1    1.87    0.66
   2 -14  -1    1.41    0.34
   2  14   1    1.19    0.55
  -2  14  -1    0.75    0.58
   2  14   1    0.52    0.46
  -2  14  -1    1.98    0.77
  -2 -14   1   -0.42    1.97
  -2 -14   1   -0.20    0.94
   2 -14  -1    1.68    0.61
   2 -14  -1    0.23    2.26
  -2 -14   1    1.42    0.73
   2 -14  -1    0.79    0.42
   3 -14   1    0.42    0.52
  -3  14   1   -0.51    0.45
   3 -14   1    0.29    3.13
   3 -14   1    0.29    0.46
   3  14  -1   -0.04    0.56
   3  14  -1   -0.14    0.30
  -3 -14  -1    0.61    1.45
  -3  14   1    0.43    0.50
   3 -14   1    0.35    0.26
  -3 -14  -1   -0.87    2.12
  -3 -14  -1    0.91    0.56
   3  14   1    1.14    0.49
   3  14   1    0.13    0.46
  -3 -14   1    0.21    2.91
   3 -14  -1   -1.26    2.56
  -3  14  -1   -0.29    0.37
  -3 -14   1    0.42    0.56
   3 -14  -1    0.25    0.38
   3 -14  -1    1.55    0.72
   3  14   1   -0.11    1.30
  -3 -14   1   -0.32    1.14
   4  14  -1    3.01    0.96
   4 -14   1    0.87    3.09
  -4  14   1    2.09    0.73
  -4 -14  -1    3.37    3.40
   4  14  -1   -1.09    2.09
   4  14  -1    2.10    3.18
  -4  14   1    2.01    0.69
   4  14  -1    3.22    1.05
  -4 -14  -1    4.02    1.04
   4 -14   1    3.02    0.95
   4  14   1    4.51    1.15
   4 -14  -1    2.31    0.89
  -4  14  -1    3.15    0.86
   4 -14  -1   -0.39    3.21
  -4 -14   1    3.78    1.06
  -4 -14   1    0.98    3.02
  -4  14  -1    2.90    0.81
   4  14   1    1.01    2.31
   4  14   1    2.26    0.59
  -5 -14  -1    6.81    1.34
   5  14  -1    5.84    1.36
  -5  14   1    3.91    1.06
  -5  14   1    5.57    1.21
   5 -14   1    5.90    1.31
  -5 -14   1    4.72    4.70
  -5 -14   1    4.76    1.04
  -5  14  -1    4.73    1.17
   5  14   1    5.25    1.36
   5 -14  -1    3.74    1.12
  -6 -14  -1   -1.72    3.73
  -6 -14  -1   -1.11    1.94
  -6 -14   1    4.12    4.53
  -6 -14   1   -0.85    1.68
   0  15   1   10.47    1.25
   0  15  -1    8.55    1.52
   0  15   1   11.11    1.67
   0  15  -1   11.65    1.20
   1 -15   1    3.33    0.64
  -1 -15  -1    1.99    0.83
  -1 -15  -1    0.63    1.18
   1 -15   1    4.22    4.04
  -1  15   1    3.07    0.84
   1 -15   1    2.90    0.86
  -1  15   1    3.02    0.84
   1  15  -1    2.39    0.71
  -1 -15  -1    1.29    2.94
   1 -15  -1    2.67    0.91
   1 -15  -1    2.84    3.43
  -1 -15   1    1.66    0.66
  -1 -15   1    1.35    1.39
   1  15   1    3.00    0.74
  -1 -15   1    0.44    2.71
  -1  15  -1    2.78    0.76
   1 -15  -1    1.76    0.57
  -1  15  -1    2.69    0.84
   1 -15  -1    2.65    0.76
   1  15   1    2.35    0.74
   2 -15   1   -0.09    3.40
  -2  15   1    2.03    0.78
   2 -15   1    1.12    0.35
  -2 -15  -1    4.87    3.54
   2  15  -1    0.71    0.63
  -2  15   1    1.38    0.79
   2 -15   1    1.41    0.64
  -2 -15  -1    1.22    1.46
   2  15  -1    1.00    0.48
   2 -15   1    1.35    0.62
  -2 -15  -1    1.48    0.70
  -2 -15   1    0.93    1.14
   2  15   1    1.66    0.47
   2 -15  -1    1.94    0.61
  -2 -15   1   -1.14    2.08
  -2 -15   1    0.04    0.51
  -2  15  -1    1.60    0.64
  -2  15  -1    0.51    0.60
   2 -15  -1    1.49    0.63
   2  15   1    1.45    0.61
   3 -15   1    0.24    0.58
  -3 -15  -1    0.57    0.61
  -3  15   1    0.36    0.54
   3  15  -1    0.14    0.44
   3 -15   1    0.36    0.48
  -3 -15  -1    1.79    1.69
  -3  15   1    1.07    0.64
   3  15  -1    0.59    0.46
   3 -15   1   -0.22    2.65
   3  15  -1    2.19    2.18
  -3 -15  -1    0.79    2.90
   3  15   1    0.05    1.95
  -3  15  -1    0.37    0.51
  -3 -15   1   -0.54    2.94
  -3  15  -1    1.34    0.61
  -3 -15   1    0.52    1.27
   3 -15  -1    0.46    0.53
   3 -15  -1    1.12    0.52
   3  15   1    1.13    0.50
  -3 -15   1    0.08    0.47
   3  15   1   -0.15    0.45
   3 -15  -1    0.18    2.87
   4 -15   1   -0.09    0.54
  -4 -15  -1    1.78    3.46
  -4 -15  -1   -0.20    1.16
  -4  15   1    0.03    0.68
   4  15  -1    1.05    0.95
   4 -15   1   -0.14    3.73
  -4 -15  -1   -0.58    1.02
   4 -15  -1    0.61    0.58
  -4 -15   1   -0.26    1.17
   4 -15  -1   -2.72    2.73
   4  15   1    0.63    0.61
  -4 -15   1   -1.15    3.32
  -4  15  -1    1.91    0.74
   5 -15   1    0.42    0.80
  -5  15   1    0.55    0.67
  -5  15   1    0.62    0.83
  -5 -15  -1   -0.13    3.42
  -5 -15  -1    1.50    1.98
  -5 -15   1    0.75    4.58
   5 -15  -1    0.71    0.93
  -5 -15   1   -1.45    1.37
  -5  15  -1    0.33    0.99
  -6 -15  -1   -3.42    2.16
   0  16   1   17.48    1.48
   0  16  -1   17.65    1.72
   0  16  -1   19.65    1.74
   0  16   1   19.80    1.77
   0 -16  -1   20.08    1.85
   0  16   1   23.53    2.10
   0 -16   1   20.07    1.85
  -1  16   1   10.02    1.63
  -1 -16  -1    4.59    4.10
   1 -16   1   10.10    1.30
   1  16  -1   10.90    1.29
   1 -16   1    3.67    3.90
  -1  16   1   10.82    1.59
  -1 -16  -1   10.83    1.70
   1  16  -1   10.52    1.21
   1 -16  -1    8.41    1.01
   1 -16  -1    8.87    1.39
   1  16   1   10.08    1.41
   1 -16  -1    6.08    4.44
   1  16   1    7.85    1.22
  -1 -16   1    8.32    4.90
  -1 -16   1    7.58    1.34
  -1  16  -1    8.79    1.46
   2  16  -1   -0.69    0.33
  -2  16   1    0.33    0.54
  -2  16   1   -1.04    0.35
   2 -16   1    0.06    0.33
  -2 -16  -1   -0.97    0.39
   2 -16   1   -0.31    0.60
   2  16  -1   -0.70    0.38
  -2 -16  -1    0.78    3.18
  -2 -16  -1    0.90    1.48
   2 -16   1    0.11    0.48
   2 -16   1   -0.74    2.69
  -2  16  -1    0.45    0.53
   2  16   1   -0.29    0.31
  -2  16  -1    1.27    0.65
  -2 -16   1   -0.41    1.19
   2 -16  -1   -1.66    2.38
   2  16   1    0.65    0.45
  -2 -16   1   -0.29    0.32
  -2 -16   1    0.11    2.62
   2 -16  -1   -0.42    0.44
   2 -16  -1    0.65    0.53
  -3  16   1   -0.28    0.50
   3  16  -1    1.41    0.56
   3 -16   1   -0.21    3.64
   3  16  -1    0.62    0.67
   3 -16   1    0.32    0.56
  -3  16   1    1.66    0.82
  -3 -16  -1    2.54    0.96
   3 -16   1    1.12    0.66
  -3 -16  -1    1.15    1.94
  -3 -16  -1    0.75    3.17
   3  16  -1   -0.11    2.64
  -3 -16   1   -0.11    3.12
   3  16   1    1.05    0.68
   3  16   1    1.31    0.59
  -3 -16   1   -0.86    1.02
   3 -16  -1   -2.96    2.90
  -3  16  -1    0.75    0.64
  -3 -16   1    0.17    0.47
   3 -16  -1    1.02    0.72
  -3  16  -1   -0.06    0.55
   3 -16  -1    0.60    0.57
   4 -16   1   -1.20    0.52
   4  16  -1   -0.83    0.48
  -4  16   1    0.15    0.60
  -4 -16  -1    0.54    3.77
  -4  16   1   -0.79    0.48
  -4 -16  -1   -1.11    1.45
  -4 -16  -1    0.97    0.90
   4 -16   1    2.31    3.39
   4 -16  -1    0.56    0.60
   4  16   1   -0.65    0.49
  -4  16  -1    0.18    0.53
  -4 -16   1   -1.33    0.56
  -4 -16   1   -1.53    1.32
   4 -16  -1   -0.14    3.21
  -4 -16   1    4.78    7.01
  -5  16   1    0.21    0.72
  -5 -16  -1   -0.63    6.31
  -5 -16  -1   -1.95    1.49
  -5 -16   1    0.39    1.68
  -5 -16   1   -6.72    4.09
   0  17   1    0.75    0.59
   0 -17  -1    0.97    0.62
   0 -17   1    2.70    4.52
   0 -17  -1   -0.76    2.80
   0 -17  -1    0.88    1.22
   0  17  -1    1.12    0.59
   0  17   1    1.44    0.64
   0  17  -1    1.59    0.76
   0 -17   1    1.69    0.68
  -1 -17  -1   -0.21    1.03
   1 -17   1    1.68    0.68
   1  17  -1    1.03    0.63
  -1  17   1    0.64    0.58
   1  17  -1    0.33    0.57
   1 -17   1   -1.06    3.06
  -1 -17  -1   -1.92    2.82
  -1 -17  -1    0.77    0.62
  -1  17   1    0.60    0.59
  -1 -17   1    0.22    3.31
  -1 -17   1    0.91    0.59
   1 -17  -1   -1.83    3.15
   1  17   1    1.29    0.57
   1  17   1    1.42    0.67
   1 -17  -1    0.91    0.50
   1 -17  -1    2.00    0.77
  -1  17  -1    1.82    0.80
  -2  17   1    4.48    1.08
   2 -17   1    5.31    1.01
  -2 -17  -1    4.78    1.12
   2  17  -1    4.84    1.05
   2 -17   1    2.70    3.60
  -2 -17  -1    2.67    3.89
   2 -17   1    4.60    1.05
   2  17  -1    3.90    1.03
  -2  17   1    3.54    0.87
   2  17   1    3.93    0.84
   2 -17  -1    4.28    1.00
   2 -17  -1    5.81    4.45
  -2 -17   1    1.22    4.35
  -2  17  -1    5.97    1.27
   2  17   1    2.47    0.82
   2 -17  -1    3.94    0.92
  -2 -17   1    3.96    1.05
  -3 -17  -1    0.58    1.78
  -3 -17  -1    0.00    3.09
   3  17  -1    4.46    1.21
   3 -17   1    2.74    0.88
  -3  17   1    3.96    1.16
  -3  17   1    1.39    0.86
   3  17  -1    3.16    0.83
  -3 -17  -1    3.16    0.94
   3 -17   1    3.99    0.94
   3 -17   1   -0.27    3.64
   3 -17  -1    3.82    1.02
  -3 -17   1    0.10    1.48
  -3  17  -1    2.31    0.97
   3  17   1    2.89    0.84
   3 -17  -1    1.80    0.84
  -3 -17   1    2.18    0.75
   3 -17  -1    0.96    4.14
  -3 -17   1    0.39    4.27
   3  17   1    3.19    1.04
  -4 -17  -1   -2.31    4.52
   4 -17   1    0.32    1.25
   4 -17   1    1.65    4.42
  -4 -17  -1   -1.74    1.24
  -4 -17   1   -0.42    1.30
   4 -17  -1   -0.67    5.21
  -4 -17   1   -1.00    4.03
   0 -18  -1   -0.06    0.63
   0  18   1   -0.53    0.36
   0 -18   1    0.29    0.65
   0 -18  -1    0.79    3.98
   0  18  -1   -0.49    0.47
   0  18   1   -0.01    0.63
   0  18  -1    0.29    0.57
   0 -18   1    0.20    3.33
  -1 -18  -1    1.95    0.78
   1  18  -1    1.56    0.62
   1  18  -1   -0.03    0.56
   1 -18   1    2.39    4.42
  -1  18   1    1.95    1.28
   1 -18   1    2.20    0.83
  -1  18   1    1.11    0.74
   1  18   1    1.02    0.73
  -1  18  -1    1.11    0.75
  -1 -18   1    1.59    0.77
   1 -18  -1    3.20    1.09
  -1  18  -1    1.14    0.61
   1 -18  -1    1.00    3.98
   1  18   1    1.02    0.59
   2  18  -1    4.12    0.97
  -2 -18  -1   -1.32    1.43
   2 -18   1    2.59    0.83
   2 -18   1    2.73    4.75
  -2 -18  -1   -3.17    2.95
   2  18  -1    3.51    1.14
  -2 -18  -1    3.91    1.00
  -2  18   1    1.22    0.80
  -2  18   1    1.74    0.91
   2 -18  -1    2.67    0.84
   2 -18  -1    0.76    4.32
   2 -18  -1    4.71    1.05
   2  18   1    3.17    0.83
  -2 -18   1   -0.19    1.29
   2  18   1    2.82    1.05
  -2 -18   1    0.29    3.57
  -2 -18   1    0.52    0.75
  -2  18  -1    0.96    0.90
   3 -18   1   -0.80    1.34
  -3  18   1   -0.18    0.58
  -3 -18  -1    0.84    1.55
   3  18  -1    0.92    0.69
   3  18  -1    0.97    0.57
   3 -18   1    0.74    0.66
  -3 -18  -1    2.60    3.92
   3 -18   1   -1.09    3.63
  -3 -18   1   -3.62    3.93
  -3 -18   1   -0.05    1.35
   3  18   1    0.78    0.67
   3 -18  -1    0.78    0.68
   3 -18  -1   -1.20    4.78
   4 -18   1   -0.56    0.63
   4 -18   1    1.43    5.45
   4 -18  -1   -1.11    5.91
   4 -18  -1   -1.14    0.67
   0  19  -1    1.81    0.65
   0  19  -1    1.92    0.96
   0  19   1    2.09    0.76
   0  19   1    1.41    0.71
   0 -19  -1    0.90    3.72
   0 -19   1   -0.11    4.08
  -1  19   1    1.09    0.77
  -1 -19  -1    1.29    3.93
  -1 -19  -1   -0.04    1.24
   1  19  -1    1.24    1.24
  -1  19   1    1.98    0.83
   1 -19   1    2.75    0.95
   1 -19   1    2.91    5.76
   1  19  -1    2.70    0.86
  -1 -19  -1    1.77    0.86
   1 -19  -1    3.68    1.18
   1  19   1    2.65    0.90
  -1  19  -1    0.64    0.59
  -1  19  -1    1.60    0.77
  -1 -19   1    3.99    1.12
   1  19   1    1.29    0.70
  -1 -19   1    3.61    4.64
   1 -19  -1    3.48    5.33
   2 -19   1   -1.30    5.01
   2  19  -1    0.98    0.66
   2 -19   1    1.10    0.74
   2  19  -1    1.40    0.66
   2 -19  -1   -4.12    4.15
   2  19   1    1.46    0.80
   2  19   1    1.98    0.74
   2 -19  -1   -0.41    0.73
   3  19  -1    2.41    4.30
   3 -19   1    1.95    5.18
   3 -19  -1   -1.78    4.94
   4 -19   1   -2.96    6.93
   4 -19  -1    2.42    7.22
   0 -20   1    1.54    0.91
   0  20  -1    0.47    0.59
   0  20   1    0.27    0.54
   0  20   1   -1.07    0.47
   0  20  -1    2.34    0.76
   0 -20  -1   -0.11    0.69
   1 -20   1   -0.42    0.73
   1  20  -1   -1.28    0.65
   1  20  -1    0.98    0.70
  -1  20   1   -0.85    0.48
   1 -20  -1    0.78    0.67
   1  20   1    0.53    0.60
   1  20   1    0.99    0.76
   2  20  -1    0.44    0.78
   2 -20   1    2.01    0.94
   2 -20  -1    0.89    0.92
   2  20   1   -0.70    0.80
   2 -20  -1   -0.29    6.96
   3  20  -1    0.12    5.48
  -1  21  -1    0.15    0.67
   2 -21   1   -0.22    1.26
   1   0   2  296.35    4.65
   1   0  -2  303.26    4.68
  -1   0  -2  311.04    4.43
  -1   0  -2  306.00    4.70
  -1   0   2  305.39    4.87
   1   0  -2  298.71    4.30
   1   0  -2  303.17    4.89
  -1   0   2  304.39    4.58
   1   0   2  306.01    4.48
  -1   0   2  302.05    4.29
  -1   0   2  293.98    4.30
   1   0  -2  300.41    4.51
   1   0   2  309.68    4.75
  -1   0  -2  296.80    4.37
  -1   0  -2  301.86    4.67
  -1   0   2  309.10    4.64
  -1   0   2  309.30    4.56
  -2   0  -2    0.25    0.14
   2   0  -2    0.75    0.26
  -2   0   2    3.08    3.36
   2   0   2    0.47    0.26
   2   0  -2    0.52    0.26
  -2   0  -2    3.49    3.82
   2   0   2    5.40    4.17
  -2   0   2    0.68    0.24
   2   0   2    0.26    0.14
  -2   0   2    0.38    0.19
  -2   0   2    0.35    0.14
   2   0  -2    0.43    0.14
  -2   0   2    0.48    0.23
   2   0   2    0.22    0.20
  -2   0   2    0.35    0.15
  -2   0   2    0.33    0.21
   2   0  -2   -0.65    3.14
   2   0   2    0.45    0.28
  -2   0  -2    0.06    0.17
  -2   0  -2    0.45    0.21
   2   0  -2    0.78    0.31
  -2   0  -2    0.23    0.21
  -3   0   2   17.19    0.65
  -3   0  -2   15.08    0.98
  -3   0   2   19.76    1.79
   3   0   2   14.63    1.06
   3   0   2   16.76    1.13
  -3   0   2   17.67    0.91
   3   0   2   16.49    0.71
  -3   0   2   26.41    9.06
   3   0  -2   16.29    1.03
  -3   0  -2   16.53    1.12
  -3   0   2   17.00    1.07
  -3   0   2   16.30    1.09
  -3   0   2   16.95    0.71
   3   0   2   16.34    1.13
   3   0  -2   14.86    1.16
   3   0  -2   17.49    0.71
  -3   0   2   15.54    0.67
   3   0  -2   16.61    1.18
  -3   0  -2   16.73    0.49
  -3   0  -2   16.39    0.47
  -3   0  -2   15.46    1.10
  -3   0  -2   17.70    0.87
  -3   0  -2   15.90    1.06
   4   0  -2    3.60    0.76
   4   0   2    1.90    0.57
   4   0  -2    2.74    0.72
  -4   0  -2    2.53    0.37
  -4   0   2    2.29    0.31
  -4   0   2    2.64    0.48
  -4   0  -2    2.43    0.40
   4   0   2    2.15    0.58
  -4   0   2    2.75    0.34
  -4   0   2    2.37    0.34
   4   0  -2    3.17    0.69
   4   0  -2    0.56    1.45
  -4   0  -2    0.48    1.20
   5   0   2   20.83    1.62
  -5   0  -2   19.35    0.92
   5   0   2   19.14    1.62
  -5   0   2   20.88    0.73
  -5   0  -2   20.85    0.89
   5   0   2   20.61    1.76
   5   0  -2   18.23    1.67
  -5   0   2   20.49    1.06
   5   0  -2   20.92    1.74
  -5   0   2   21.12    0.74
  -5   0   2   21.72    1.16
   5   0  -2   20.49    1.58
  -5   0  -2   19.96    0.95
   6   0  -2    6.46    1.33
  -6   0   2    5.76    0.61
   6   0   2    6.22    1.20
  -6   0  -2    2.99    1.31
   6   0  -2    7.48    1.35
   6   0   2    4.81    1.22
   6   0  -2    3.50    3.51
   6   0  -2    6.31    1.15
   7   0   2    0.18    0.53
   7   0   2    0.12    0.60
   7   0  -2   -1.33    3.16
   7   0   2    2.07    0.92
   7   0  -2    0.17    0.82
   7   0  -2    1.25    0.71
   8   0   2    1.26    0.80
   0   1   2   76.56    6.07
   0  -1  -2   67.96    4.54
  -1   1   2   90.61    1.91
  -1  -1  -2   93.10    1.79
  -1  -1  -2   90.92    1.57
  -1   1   2   93.41    1.66
  -1   1   2   90.93    2.08
  -1   1   2   92.51    1.97
   1  -1   2   92.75    2.00
   1   1  -2   92.83    1.82
  -1   1   2   92.05    1.53
   1   1  -2   93.48    1.50
   1   1  -2   92.97    1.80
  -1   1   2   95.64    9.53
   1  -1   2   92.42    1.65
   1  -1   2   90.33    1.40
  -1  -1  -2   92.07    1.63
   1   1  -2   90.62    2.06
   1  -1   2   94.68    1.72
   1  -1   2   91.75    1.85
   1  -1   2   93.28    1.80
  -1  -1  -2   92.95    2.01
  -1  -1  -2   90.02    1.83
   1   1   2   94.85    1.57
   1  -1  -2   91.31    1.88
  -1  -1   2   88.90    1.78
  -1  -1   2   92.46    1.49
  -1   1  -2   93.98    1.82
   1  -1  -2   94.42    2.13
  -1   1  -2  112.09    9.39
  -1   1  -2   92.89    1.64
  -1   1  -2   94.37    1.69
  -1  -1   2   92.47    1.94
  -1  -1   2   93.28    2.04
   1   1   2   94.56    1.84
   1  -1  -2   90.94    1.51
   1  -1  -2   88.87    9.46
  -1   1  -2   92.04    2.01
  -1   1  -2   89.75    1.79
   1   1   2   90.92    1.62
   1  -1  -2   89.93    2.01
   1   1   2   92.45    2.03
   2   1  -2   52.46    1.67
  -2   1   2   53.10    1.83
  -2   1   2   52.30    1.04
  -2   1   2   53.90    1.54
   2  -1   2   55.32    1.70
  -2   1   2   53.82    1.55
  -2  -1  -2   51.58    1.72
   2  -1   2   54.13    1.38
  -2  -1  -2   52.40    1.17
   2  -1   2   54.53    1.67
  -2  -1  -2   53.47    1.71
   2   1  -2   51.89    1.37
   2   1  -2   54.27    1.71
   2  -1   2   49.52    1.74
   2   1  -2   54.51    1.90
  -2  -1  -2   53.16    1.60
  -2   1   2   53.71    1.77
  -2  -1  -2   53.64    1.10
  -2   1  -2   54.64    1.60
  -2  -1   2   52.47    1.71
  -2   1  -2   52.60    1.56
   2   1   2   53.64    1.82
  -2  -1   2   51.71    1.44
   2  -1  -2   52.30    1.43
   2  -1  -2   51.41    1.02
  -2  -1   2   52.29    1.79
  -2  -1   2   52.58    1.62
   2   1   2   52.53    1.65
  -2  -1   2   50.99    1.38
   2   1   2   52.27    1.69
  -2   1  -2   52.30    1.20
   2  -1  -2   55.28    1.90
  -2   1  -2   51.61    1.81
   2  -1  -2   51.66    1.80
   2  -1  -2   53.78    1.52
   2   1   2   53.50    1.15
  -2  -1   2   53.70    0.99
  -2   1  -2   52.07    1.59
  -3  -1  -2    4.25    0.30
  -3  -1  -2    4.94    0.61
  -3  -1  -2    4.49    0.45
   3  -1   2    3.77    0.64
  -3   1   2    4.18    0.63
   3   1  -2    3.64    0.40
  -3  -1  -2    4.47    0.34
  -3   1   2    3.56    0.37
  -3   1   2    4.71    0.76
  -3  -1  -2    4.37    0.31
  -3  -1  -2    3.91    0.65
  -3  -1  -2    2.11    3.04
   3  -1   2    4.51    0.72
   3   1  -2    4.52    0.71
   3   1  -2    3.13    0.68
   3   1  -2    1.73    3.16
  -3   1   2    4.51    0.49
   3   1  -2    4.06    0.65
  -3  -1  -2    4.05    0.61
   3  -1   2    3.86    0.64
  -3   1   2    3.26    3.48
  -3   1   2    3.86    0.27
   3  -1  -2    3.71    0.68
  -3  -1   2    4.35    0.26
  -3   1  -2    3.82    0.42
  -3  -1   2    3.89    0.53
  -3   1  -2    4.07    0.34
  -3  -1   2    7.50    1.89
  -3   1  -2    0.39    3.62
   3   1   2    4.19    0.71
  -3   1  -2    4.69    0.56
   3   1   2    5.16    0.78
   3   1   2    4.75    0.33
  -3  -1   2    3.67    0.41
   3  -1  -2    2.30    5.20
   3  -1  -2    4.74    0.56
  -3  -1   2    4.51    0.24
   3  -1  -2    4.90    0.78
  -3  -1   2    5.38    0.65
   3   1   2    5.49    0.63
  -3  -1   2    4.50    0.69
  -3  -1   2   17.17    7.30
  -3   1  -2    3.91    0.34
   3  -1  -2    3.97    0.41
  -3   1  -2    4.44    0.53
  -4   1   2   24.88    1.20
  -4   1   2   24.38    1.00
  -4  -1  -2   23.73    1.09
  -4  -1  -2   24.45    0.82
  -4  -1  -2   24.60    0.76
   4  -1   2   24.69    1.63
   4   1  -2   21.12    1.64
  -4  -1  -2   24.67    0.80
   4   1  -2   26.67    1.66
   4   1  -2   25.27    1.58
   4  -1   2   23.41    1.54
   4  -1   2   25.26    1.64
  -4   1   2   24.19    0.72
  -4  -1  -2   20.96    3.63
  -4  -1   2   24.77    1.09
   4  -1  -2   25.79    1.71
  -4   1  -2   25.96    1.12
   4   1   2   26.88    1.63
  -4   1  -2   22.70    3.38
   4   1   2   25.43    1.69
  -4  -1   2   25.23    1.22
   4  -1  -2   25.25    1.46
  -4   1  -2   24.56    0.89
   4  -1  -2   23.61    1.67
   4   1   2   24.78    1.64
  -4   1  -2   24.44    0.85
  -5   1   2   47.05    1.47
   5   1  -2   43.35    2.40
   5  -1   2   49.83    2.64
   5   1  -2   47.65    2.77
  -5   1   2   47.81    1.52
  -5  -1  -2   47.16    1.67
   5  -1   2   43.07    2.36
   5  -1   2   45.48    2.51
  -5   1   2   49.40    1.75
   5   1  -2   47.53    2.40
   5   1   2   46.91    2.56
  -5  -1   2   46.64    1.59
  -5   1  -2   45.12    1.16
   5   1   2   47.71    2.42
   5  -1  -2   44.47    2.54
   5  -1  -2   50.59    2.79
   5   1   2   43.66    2.53
   5  -1  -2   47.20    2.29
  -5   1  -2   45.76    1.15
  -5   1  -2   46.46    1.59
  -5  -1   2   48.05    1.82
   6  -1   2   17.56    1.74
   6  -1   2   18.09    1.64
   6   1  -2   20.29    2.09
  -6  -1  -2   17.73    0.95
  -6   1   2   17.57    1.00
   6   1  -2   17.34    1.62
   6   1  -2   19.54    1.93
   6  -1   2   19.64    1.84
  -6   1  -2   17.26    0.89
   6   1   2   18.41    1.64
  -6  -1   2   19.29    1.12
   6  -1  -2   13.71    1.62
   6   1   2   17.29    1.71
   6  -1  -2   17.38    1.89
   6  -1  -2   19.01    1.59
   6   1   2   14.73    1.60
  -6  -1   2   17.81    0.90
   7   1  -2    1.87    0.89
   7  -1   2    1.63    0.83
   7  -1   2    0.83    0.75
   7  -1   2    4.11    1.16
   7   1  -2    2.34    4.15
   7   1  -2    0.68    0.82
   7   1   2    2.41    1.00
   7  -1  -2    0.29    3.60
   7   1   2    0.69    0.76
   7   1   2    2.27    0.78
   7  -1  -2    1.19    0.87
   7  -1  -2    0.89    0.77
   8  -1   2    2.13    0.97
   0  -2   2   58.50    1.34
   0  -2  -2   59.92    1.15
   0  -2   2   60.35    1.31
   0   2  -2   59.41    1.31
   0  -2  -2   59.90    1.43
   0   2  -2   60.04    1.09
   0   2   2   59.15    1.42
   0   2   2   59.97    1.16
  -1   2   2  353.13   10.39
   1   2  -2  317.63    8.73
   1   2  -2  311.35   10.92
   1   2  -2  360.69   14.72
  -1  -2  -2  361.88    7.34
  -1  -2   2  398.97   13.47
  -1  -2   2  348.70   11.92
  -2   2   2    2.55    0.48
   2   2  -2    2.01    0.39
  -2  -2  -2    2.02    0.43
  -2  -2  -2    3.17    2.63
  -2   2   2    3.16    0.45
  -2   2   2    3.97    1.11
  -2  -2  -2    2.73    0.44
  -2  -2  -2    2.47    0.43
   2   2  -2    2.46    0.47
  -2   2   2   -1.22    3.15
  -2  -2  -2    2.57    0.33
   2   2  -2    1.89    2.79
  -2   2   2    2.47    0.86
  -2   2   2    2.27    0.48
   2   2  -2    2.50    0.39
   2  -2   2    2.35    0.38
   2   2  -2    1.85    0.45
   2  -2   2    2.67    0.44
  -2   2   2    2.72    0.34
  -2  -2  -2    2.26    0.39
   2  -2   2    2.69    0.53
   2  -2   2    2.49    0.43
  -2  -2  -2    3.81    2.76
   2   2  -2    3.91    2.23
  -2  -2  -2    2.39    0.24
   2  -2   2    2.46    0.23
  -2  -2  -2    4.11    1.36
   2   2   2    1.71    0.41
  -2  -2   2    1.60    0.40
   2  -2  -2    1.79    0.45
  -2  -2   2    2.44    0.47
  -2  -2   2    2.26    0.39
  -2  -2   2    3.15    1.53
   2  -2  -2    1.62    0.43
  -2   2  -2    2.43    0.40
   2  -2  -2    2.62    0.32
  -2  -2   2    2.34    0.38
  -2   2  -2    2.11    0.37
  -2   2  -2    4.69    2.13
   2  -2  -2    2.32    0.39
   2   2   2    2.09    0.44
   2   2   2    2.26    0.41
  -2   2  -2    2.18    0.39
  -2  -2   2    5.17    3.68
  -2   2  -2   -0.50    3.49
   2  -2  -2   -1.68    3.17
  -2   2  -2    1.95    0.43
  -2   2  -2    2.41    0.22
  -2   2  -2    2.31    0.21
   2   2   2    5.39    2.98
   2   2   2    2.41    0.26
  -2  -2   2    3.66    1.50
  -2  -2   2    2.46    0.91
  -3   2   2    6.74    0.60
  -3  -2  -2    7.64    0.71
  -3  -2  -2    7.20    0.36
   3   2  -2    7.25    0.58
  -3  -2  -2    6.69    0.46
  -3  -2  -2    6.62    0.67
   3  -2   2    7.01    0.81
  -3   2   2    7.27    0.57
  -3  -2  -2   16.20    5.18
   3  -2   2    7.16    0.72
  -3  -2  -2   13.64    5.53
   3   2  -2    7.04    0.73
   3   2  -2    6.98    0.75
  -3  -2  -2    7.58    0.64
  -3   2   2    6.86    1.01
   3  -2   2    2.23    3.72
  -3   2   2    7.10    0.62
   3   2  -2    7.30    0.83
   3  -2   2    7.72    0.77
  -3   2   2    8.02    1.21
   3  -2   2    6.45    0.31
   3  -2  -2    5.92    0.59
  -3  -2   2   21.08    7.89
  -3   2  -2    6.89    0.33
   3  -2  -2    6.38    0.53
  -3   2  -2    7.34    0.68
  -3   2  -2    6.53    0.34
   3   2   2    7.49    0.72
  -3   2  -2    7.48    0.61
   3  -2  -2    6.50    0.95
  -3  -2   2    9.81    3.52
   3   2   2    7.11    0.81
  -3   2  -2    7.78    0.65
  -3   2  -2    3.05    4.90
  -3   2  -2    7.01    0.51
  -3  -2   2    7.46    0.61
   3  -2  -2    2.49    4.19
  -3  -2   2    7.80    0.63
   3  -2  -2    7.13    0.83
   3   2   2    3.74    3.97
   3   2   2    7.34    0.82
  -3  -2   2    7.71    0.71
   3   2   2    6.74    0.48
   4   2  -2   16.42    1.26
  -4  -2  -2   12.62    2.76
  -4  -2  -2   20.63    3.57
   4  -2   2   16.20    1.35
  -4   2   2   12.92    1.35
  -4   2   2   18.73    0.96
  -4   2   2   18.03    1.02
  -4  -2  -2   17.66    1.03
   4   2  -2   16.78    1.45
   4  -2   2   18.22    1.38
   4   2  -2   16.15    1.28
   4  -2   2   17.69    1.27
  -4  -2  -2   16.78    0.74
  -4  -2  -2   15.50    0.73
   4  -2  -2   15.63    1.35
   4   2   2   15.67    1.40
  -4   2  -2   16.54    0.49
  -4   2  -2   22.30    3.31
  -4  -2   2   14.99    1.47
   4  -2  -2   17.30    1.17
   4   2   2   15.72    1.36
  -4   2  -2   15.74    0.95
  -4  -2   2   17.83    1.05
  -4   2  -2   16.82    0.48
  -4  -2   2   11.87    2.01
  -4  -2   2   16.77    1.00
   4  -2  -2   17.22    1.45
   4   2   2   16.46    1.35
  -4   2  -2   19.47    3.00
   5   2  -2   10.77    1.56
  -5   2   2   13.06    1.00
   5   2  -2   11.71    1.24
   5  -2   2   12.57    1.27
  -5  -2  -2    6.34    2.56
  -5   2   2   13.20    0.86
  -5  -2  -2   11.78    0.60
  -5  -2  -2   10.94    0.55
   5   2  -2   10.85    1.23
  -5  -2  -2   13.88    0.95
  -5  -2  -2   11.39    1.84
   5  -2   2   13.17    1.38
   5  -2   2   12.66    1.29
  -5   2   2   12.80    0.87
   5   2   2   11.88    1.34
   5  -2  -2   13.18    1.48
   5   2   2   13.10    1.29
  -5   2  -2   10.38    2.72
  -5   2  -2   12.55    3.10
  -5  -2   2   12.62    0.97
  -5   2  -2   12.24    0.90
   5  -2  -2   12.49    1.40
  -5  -2   2   11.88    0.90
   5  -2  -2   13.19    1.15
   5   2   2   12.66    1.35
  -5  -2   2   11.56    1.72
   6  -2   2   -0.30    0.53
   6  -2   2   -0.12    0.51
   6   2  -2    1.04    2.47
  -6  -2  -2   -0.24    1.19
  -6  -2  -2   -0.56    0.88
  -6  -2  -2    0.12    0.30
   6   2  -2   -0.22    0.50
  -6   2   2    0.19    0.23
   6   2  -2   -0.47    0.48
   6   2  -2    0.73    0.48
  -6   2   2    0.54    0.27
   6  -2   2   -0.15    0.52
  -6  -2   2    0.08    0.28
  -6  -2   2    0.67    0.28
   6   2   2    0.12    0.69
   6   2   2   -0.20    0.42
   6  -2  -2    0.22    0.56
   6  -2  -2    1.04    0.49
   6  -2  -2    1.20    2.69
   6   2   2   -0.34    2.35
   6  -2  -2    0.29    0.70
   6   2   2    0.15    0.56
  -6   2  -2    0.42    0.28
   7   2  -2    3.41    1.12
   7  -2   2    3.21    1.00
   7   2  -2   -0.93    2.90
   7  -2   2    3.37    1.15
   7  -2   2    2.17    0.92
   7   2  -2    4.04    1.00
   7   2   2    4.90    1.15
   7  -2  -2   -1.30    2.22
   7  -2  -2    2.51    0.91
   7   2   2    4.00    0.93
   8  -2   2    4.31    1.09
   8   2  -2   -2.14    6.91
   0   3  -2  215.42    3.67
   0   3   2  215.35    3.82
   0   3  -2  217.86    3.63
   0   3  -2  225.60    3.32
   0   3   2  221.14    3.38
   0  -3  -2  215.98    3.82
   0  -3   2  226.50    3.64
   0  -3   2  226.05    3.73
   0  -3   2  220.10    3.74
   0   3  -2  224.35    3.31
  -1   3   2   30.26    7.02
   1  -3   2   37.09    1.20
   1  -3   2   35.76    1.25
  -1  -3  -2   35.94    1.27
  -1   3   2   38.10    1.26
  -1  -3  -2   38.21    1.28
   1   3  -2   36.92    0.83
  -1   3   2   36.00    1.25
   1   3  -2   37.74    1.24
   1  -3   2   36.02    1.00
  -1  -3  -2   37.00    1.18
   1   3  -2   37.28    0.94
   1  -3   2   37.93    1.09
   1   3   2   36.36    1.17
  -1  -3   2   36.37    0.90
  -1   3  -2   36.07    1.20
  -1   3  -2   35.54    1.06
   1  -3  -2   37.06    1.30
  -1  -3   2   36.84    1.26
  -1  -3   2   36.26    1.26
  -1   3  -2   36.13    0.98
  -1   3  -2   35.21    1.25
   1   3   2   35.94    1.16
  -1  -3   2   38.39    1.21
   1   3   2   38.67    1.05
   1  -3  -2   35.54    1.24
   1   3   2   35.75    1.28
   2  -3   2   32.83    0.84
  -2  -3  -2   32.07    1.11
  -2   3   2   30.27    0.93
   2   3  -2   31.90    0.61
   2   3  -2   32.72    1.41
  -2   3   2   32.62    1.44
   2   3  -2   33.74    1.51
  -2   3   2   29.19    1.59
   2  -3   2   31.91    1.22
   2  -3   2   31.44    1.45
  -2  -3  -2   32.43    1.29
   2   3  -2   32.01    1.31
   2  -3   2   33.16    1.01
  -2  -3  -2   30.07    1.42
  -2   3   2   31.06    1.24
  -2  -3  -2   31.95    1.18
   2  -3   2   32.42    1.19
  -2  -3  -2   31.92    1.30
   2   3  -2   32.14    1.27
   2  -3  -2   30.52    0.58
   2   3   2   33.39    1.50
   2  -3  -2   31.56    0.97
  -2  -3   2   32.21    1.09
   2   3   2   31.00    1.36
  -2   3  -2   31.51    1.21
  -2   3  -2   30.56    0.95
  -2   3  -2   31.26    0.89
  -2  -3   2   30.61    1.50
  -2   3  -2   31.45    1.08
   2  -3  -2   33.84    1.28
   2  -3  -2   29.64    1.46
  -2   3  -2   31.22    1.23
  -2   3  -2   28.04    1.63
  -2  -3   2   31.19    1.27
   2  -3  -2   31.94    0.59
   2   3   2   32.71    0.90
   3  -3   2   54.22    2.27
  -3  -3  -2   59.03    1.96
  -3  -3  -2   55.91    1.59
   3  -3   2   54.73    1.34
  -3  -3  -2   58.21    2.06
   3   3  -2   57.12    2.12
  -3   3   2   57.20    1.72
   3  -3   2   54.73    1.95
   3   3  -2   55.16    2.36
  -3   3   2   55.09    1.78
  -3   3   2   58.14    1.86
   3  -3   2   55.19    2.09
   3   3  -2   56.51    2.20
   3   3  -2   54.95    1.94
  -3  -3   2   53.98    1.88
   3   3   2   59.75    2.38
   3  -3  -2   55.19    1.73
  -3   3  -2   54.34    1.31
  -3   3  -2   59.50    2.07
   3   3   2   55.13    2.21
  -3   3  -2   56.41    1.85
   3  -3  -2   55.79    2.36
   3  -3  -2   53.84    1.74
   3   3   2   56.02    1.01
   3   3   2   56.14    1.90
  -3  -3   2   56.51    1.90
  -4   3   2    5.78    0.77
   4  -3   2    5.11    0.89
  -4  -3  -2    5.33    0.66
  -4  -3  -2    2.58    1.82
   4   3  -2    5.68    1.10
  -4   3   2    4.99    0.59
  -4   3   2    5.76    0.62
   4   3  -2    2.97    2.11
   4  -3   2    5.31    0.86
   4   3  -2    5.80    0.95
   4  -3   2    5.41    1.02
  -4  -3  -2    4.98    0.46
  -4  -3  -2    5.43    0.49
   4   3  -2    6.74    0.82
  -4  -3  -2    4.74    2.12
   4  -3  -2    4.99    0.92
  -4  -3   2    6.22    0.66
   4   3   2    6.15    0.75
  -4  -3   2    5.75    0.63
  -4   3  -2    3.10    1.76
   4   3   2    5.36    0.91
  -4   3  -2    6.77    0.66
   4  -3  -2    5.59    0.78
   4  -3  -2    5.77    1.07
   4  -3  -2    4.44    0.52
   4   3   2    6.22    1.04
  -4   3  -2    5.27    0.34
   5  -3   2    3.99    0.86
   5  -3   2    4.28    0.97
  -5   3   2    4.31    0.65
   5   3  -2    4.68    1.02
  -5  -3  -2    4.56    0.47
  -5  -3  -2    4.82    0.48
   5   3  -2    4.62    0.90
   5   3  -2    4.77    0.92
   5  -3   2    4.15    0.95
  -5  -3  -2    4.87    0.76
  -5   3   2    3.89    0.62
   5  -3  -2    6.35    1.22
  -5  -3   2    5.05    0.79
  -5   3  -2    5.02    0.76
  -5  -3   2    5.21    0.75
   5   3   2    4.31    1.01
  -5  -3   2    5.55    0.76
   5   3   2    4.66    0.98
   5  -3  -2    1.00    2.42
   5  -3  -2    4.36    0.84
   5  -3  -2    6.32    1.19
   5   3   2    4.30    0.83
  -6   3   2    1.42    0.36
   6  -3   2    2.79    0.73
  -6   3   2    1.72    0.47
  -6  -3  -2   -0.32    1.00
   6   3  -2   -1.37    2.06
   6  -3   2    2.44    0.85
   6   3  -2    2.68    0.97
  -6  -3  -2    0.01    1.30
   6  -3   2    1.93    0.73
   6   3  -2    2.33    0.74
  -6  -3   2    1.88    0.50
   6   3   2    1.18    0.68
   6  -3  -2    1.86    0.69
   6   3   2    1.76    0.72
  -6  -3   2    3.14    0.60
   6   3   2    1.53    0.70
  -6   3  -2    3.25    0.62
   6   3   2    2.75    2.52
   6  -3  -2    1.50    3.33
   6  -3  -2    2.93    0.71
   7  -3   2    0.27    0.86
   7   3  -2    0.21    0.57
   7   3  -2    1.05    3.44
   7  -3   2    2.28    0.84
   7  -3  -2    0.87    3.30
   7   3   2    0.18    0.55
   7   3   2    0.62    0.78
   8  -3   2   -0.26    0.82
   8   3  -2    0.06    0.68
   0  -4  -2  289.08    4.76
   0  -4  -2  280.42    4.34
   0   4  -2  278.30    4.70
   0  -4   2  282.47    4.76
   0   4  -2  284.20    4.66
   0  -4  -2  284.54    4.92
   0   4  -2  281.04    4.23
   0  -4   2  278.51    4.82
   0   4   2  281.64    4.32
   0  -4   2  291.59    4.67
   1   4  -2   16.13    3.27
  -1   4   2   19.92    3.60
  -1  -4  -2   12.51    0.74
  -1  -4  -2   20.63    5.25
  -1   4   2   11.14    0.70
  -1  -4  -2   11.88    0.75
   1  -4   2   12.64    0.70
   1  -4   2   11.61    0.62
   1   4  -2   12.36    0.75
  -1   4   2   12.31    0.80
   1   4  -2   11.81    0.74
  -1  -4  -2   11.89    0.78
   1  -4   2   12.28    0.77
   1  -4   2   12.29    0.73
   1   4  -2   11.65    0.36
   1   4  -2   12.61    0.60
  -1  -4   2   12.52    0.71
  -1   4  -2   11.80    0.69
  -1  -4   2   11.55    0.75
  -1   4  -2   11.23    1.71
  -1  -4   2   11.46    0.76
  -1   4  -2   13.20    0.79
  -1  -4   2   15.78    2.27
   1  -4  -2   11.38    0.74
   1  -4  -2   12.57    0.60
  -1   4  -2   12.67    0.62
  -1  -4   2   17.68    3.65
  -1  -4   2   12.15    0.57
   1   4   2   12.23    0.78
   1  -4  -2   15.02    2.32
   1   4   2   11.40    0.72
   1  -4  -2   11.99    0.77
  -1  -4   2   12.34    0.77
   1   4   2   13.26    0.73
  -1   4  -2   11.69    0.73
   2   4  -2   51.48    1.42
  -2  -4  -2   53.94    1.74
   2   4  -2   53.35    1.10
   2   4  -2   52.37    1.77
  -2   4   2   51.26    1.90
  -2  -4  -2   49.71    1.91
   2  -4   2   53.04    1.24
   2   4  -2   56.10    2.03
   2  -4   2   51.93    1.50
  -2  -4  -2   51.74    1.62
  -2   4   2   52.77    1.14
   2  -4   2   53.28    1.98
   2  -4   2   53.68    1.55
  -2  -4  -2   55.04    1.89
  -2   4   2   53.03    1.77
  -2   4   2   55.66    2.02
  -2  -4  -2   51.99    1.50
   2   4   2   53.45    1.88
  -2  -4   2   51.41    1.81
  -2   4  -2   53.76    2.01
  -2  -4   2   51.64    1.81
  -2   4  -2   53.87    1.49
   2  -4  -2   55.33    1.22
  -2   4  -2   55.14    1.69
  -2  -4   2   51.16    1.95
   2  -4  -2   55.60    2.09
   2  -4  -2   53.92    1.77
  -2   4  -2   53.40    1.23
   2   4   2   53.95    1.29
   2   4   2   52.14    2.00
   2  -4  -2   52.13    1.06
  -2   4  -2   52.82    1.76
  -3  -4  -2   13.21    0.80
  -3  -4  -2   13.21    0.91
  -3   4   2   13.74    0.73
   3   4  -2   12.79    0.87
   3  -4   2   13.63    1.15
  -3   4   2   12.26    0.88
   3   4  -2   13.06    1.12
  -3   4   2   14.86    0.95
  -3  -4  -2   14.00    1.01
  -3  -4  -2   23.69    6.60
   3  -4   2   13.53    0.71
   3   4  -2   11.95    0.90
   3  -4   2   12.75    0.89
   3   4  -2   12.16    1.04
  -3   4   2   16.60    2.77
  -3   4   2   16.61    2.75
   3   4   2   13.20    0.42
  -3   4  -2   21.36    4.27
  -3   4  -2   12.43    0.95
  -3  -4   2   16.94    4.52
   3   4   2   14.03    1.17
   3  -4  -2   13.44    1.20
   3  -4  -2   11.24    0.81
   3   4   2   13.18    1.09
   3  -4  -2   11.51    0.72
   3   4   2   26.96    7.19
  -3   4  -2   12.88    0.80
  -3  -4   2   12.95    0.83
  -3  -4   2   15.23    2.53
  -3  -4   2   11.62    0.92
  -3   4  -2   13.18    0.92
  -4   4   2    4.87    0.56
  -4  -4  -2    5.19    0.82
   4  -4   2    4.04    0.89
  -4  -4  -2    3.99    0.47
   4   4  -2    3.75    0.68
  -4   4   2    4.72    0.69
  -4  -4  -2    3.81    1.77
   4  -4   2    3.98    0.38
  -4   4   2    5.03    0.73
   4  -4   2    3.75    0.69
  -4  -4  -2    2.27    1.92
   4   4  -2    3.72    0.86
  -4  -4  -2    2.23    1.22
   4   4  -2    3.52    0.78
   4   4  -2    1.02    1.90
  -4  -4   2    4.99    0.60
   4  -4  -2    3.55    0.80
   4   4   2    4.67    0.71
  -4  -4   2    3.03    1.51
  -4  -4   2    4.44    0.72
  -4  -4   2    3.70    0.64
  -4   4  -2    2.41    1.48
  -4   4  -2    3.31    0.62
   4   4   2    4.12    0.93
   4  -4  -2    4.82    0.70
  -4   4  -2    4.25    0.38
   4  -4  -2    1.77    2.24
   4   4   2    3.14    0.80
  -5  -4  -2    0.65    0.24
  -5   4   2    0.93    0.94
  -5  -4  -2    2.33    1.31
   5   4  -2    0.08    0.35
   5  -4   2    0.83    0.46
  -5   4   2    0.53    0.28
   5   4  -2    1.02    0.53
  -5   4   2    0.13    0.32
   5   4  -2   -0.83    1.60
   5   4  -2    0.58    0.40
   5  -4   2    0.81    0.62
  -5  -4  -2    1.08    0.29
  -5  -4  -2    1.02    0.43
  -5  -4  -2    0.18    1.40
   5   4   2   -0.40    1.53
   5   4   2    1.07    0.47
  -5  -4   2    0.81    0.37
  -5  -4   2    0.78    0.64
   5  -4  -2    1.11    0.60
   5  -4  -2    1.32    0.49
   5  -4  -2   -1.01    2.08
  -5   4  -2    3.12    1.62
   5   4   2    0.91    0.55
   5   4   2    0.33    0.50
  -5  -4   2    0.13    1.40
  -5   4  -2    0.77    1.08
   6  -4   2    1.75    0.82
  -6  -4  -2   -0.53    1.69
   6   4  -2    1.57    0.72
  -6  -4  -2    1.84    0.58
   6   4  -2    1.04    0.57
  -6   4   2    1.19    0.35
  -6  -4  -2    0.90    1.10
  -6   4   2    0.93    0.40
   6  -4   2    1.08    0.61
  -6  -4  -2    1.27    0.33
   6   4  -2   -0.39    2.42
   6  -4  -2    1.19    0.56
   6  -4  -2    1.64    2.84
  -6  -4   2    1.50    1.71
   6   4   2    0.15    2.26
  -6  -4   2    1.19    0.48
   6   4   2    1.28    0.70
   6   4   2    0.83    0.72
  -6  -4   2    0.93    0.44
  -6   4  -2    1.09    0.44
  -6  -4   2    0.25    0.53
   6  -4  -2    3.01    0.96
   7   4  -2    0.53    0.70
   7  -4   2   -0.02    0.65
   7  -4   2    0.29    0.55
   7   4  -2    0.33    0.65
   7   4  -2   -1.61    3.72
   7  -4  -2    0.65    0.77
   7   4   2    0.96    0.83
   0   5   2    0.15    0.23
   0   5  -2    0.04    0.16
   0  -5   2    0.09    0.12
   0  -5  -2    0.73    1.27
   0   5  -2    0.07    0.19
   0   5  -2    0.03    0.15
   0  -5  -2    0.10    0.14
   0  -5   2   -0.01    0.51
   0  -5   2    0.12    0.13
   0  -5   2    1.28    1.95
   0   5  -2    0.43    0.77
   0  -5  -2   -0.76    1.37
   0  -5  -2    0.10    0.15
   0  -5   2    0.09    0.20
   0   5  -2    0.58    1.40
   0  -5  -2    0.08    0.16
   0   5   2    0.24    1.99
   0  -5  -2   -0.10    0.15
   0   5   2   -0.77    2.48
   0   5  -2    0.16    0.15
   0   5   2    0.45    1.22
   0  -5   2    0.12    0.16
   0   5   2    0.12    0.13
  -1   5   2   26.21    1.12
  -1  -5  -2   27.34    1.27
   1   5  -2   28.61    1.20
  -1  -5  -2   25.00    1.20
   1  -5   2   26.51    1.04
   1  -5   2   27.46    1.17
   1  -5   2   27.34    1.18
  -1  -5  -2   26.23    1.19
   1   5  -2   27.78    1.01
   1  -5   2   27.53    1.19
   1   5  -2   27.39    1.23
  -1   5   2   26.18    1.26
  -1   5  -2   25.24    1.14
   1   5   2   25.71    1.19
   1  -5  -2   27.31    0.58
  -1   5  -2   26.88    1.16
   1  -5  -2   27.22    1.22
   1   5   2   28.18    1.25
  -1   5  -2   27.17    1.21
  -1   5  -2   26.94    1.03
   1  -5  -2   27.88    1.29
   1  -5  -2   27.10    1.01
  -1  -5   2   27.38    1.25
  -1  -5   2   28.41    1.30
  -1  -5   2   26.05    1.21
  -2  -5  -2   64.67    1.62
  -2   5   2   61.43    2.04
  -2  -5  -2   63.56    1.97
   2   5  -2   63.50    1.45
   2   5  -2   59.59    2.04
   2   5  -2   63.35    1.42
   2  -5   2   59.76    1.49
  -2  -5  -2   61.18    2.24
   2  -5   2   64.17    1.87
  -2   5   2   59.73    2.13
   2  -5   2   61.72    1.66
  -2  -5  -2   64.86    2.17
   2  -5   2   64.80    2.28
   2   5  -2   63.99    2.25
  -2  -5   2   64.42    2.17
  -2   5  -2   61.86    1.48
   2   5   2   62.93    2.29
  -2  -5   2   61.77    2.25
  -2   5  -2   63.22    1.93
   2  -5  -2   63.48    1.40
   2   5   2   63.44    2.14
  -2  -5   2   61.89    2.05
   2  -5  -2   64.58    1.22
   2  -5  -2   62.09    2.04
  -2   5  -2   60.69    2.22
  -2   5  -2   63.55    1.82
  -2  -5   2   62.91    2.06
   2  -5  -2   62.68    2.31
  -2   5  -2   64.01    2.09
   2   5   2   65.18    1.58
   2   5   2   60.94    1.94
  -3  -5  -2   13.24    0.88
  -3   5   2   14.29    3.13
   3   5  -2   14.00    0.84
   3  -5   2   13.94    0.82
  -3  -5  -2   13.26    1.03
  -3   5   2   15.28    0.68
   3   5  -2   13.19    1.19
  -3   5   2   15.34    1.02
   3  -5   2   16.52    1.31
   3   5  -2   23.01    6.49
  -3   5   2   15.09    1.05
  -3  -5  -2   27.68    7.11
   3  -5   2   14.70    0.93
   3   5  -2    7.37    4.61
   3   5  -2   15.33    1.22
  -3  -5  -2   18.89    3.81
  -3   5  -2   14.79    0.44
   3  -5  -2    3.37    5.13
   3  -5  -2    6.33    3.62
  -3  -5   2   14.80    1.08
  -3  -5   2   13.07    0.78
  -3   5  -2   21.43    4.55
  -3   5  -2   14.25    1.04
  -3  -5   2   16.46    2.91
   3   5   2   11.96    1.11
   3  -5  -2   14.95    1.28
   3   5   2   15.44    1.29
  -3   5  -2   14.45    1.02
   3   5   2   14.31    0.74
  -3  -5   2   13.97    0.97
  -3  -5   2   15.91    4.76
  -3   5  -2   13.11    0.76
   3   5   2   25.98    7.92
   3  -5  -2   14.28    0.74
   3  -5  -2   13.53    0.95
   4  -5   2    4.48    0.48
  -4   5   2    5.22    0.82
  -4  -5  -2    2.82    1.71
   4   5  -2    4.29    0.89
   4   5  -2    4.31    0.69
  -4   5   2    3.07    1.44
   4   5  -2    3.36    2.68
  -4  -5  -2    4.60    0.80
  -4  -5  -2    4.22    1.54
   4  -5   2    4.53    0.76
   4   5  -2    4.33    0.96
  -4  -5  -2    4.37    0.54
  -4   5   2    4.58    0.66
   4  -5   2    3.98    0.87
  -4   5   2    4.01    0.55
  -4  -5  -2    1.17    2.18
  -4   5  -2    4.73    0.46
   4  -5  -2    3.72    0.89
  -4  -5   2    3.35    0.59
   4  -5  -2    3.61    0.61
   4   5   2    4.65    0.95
   4  -5  -2    4.83    0.58
  -4  -5   2    2.51    1.20
  -4  -5   2    2.74    1.94
  -4   5  -2    3.64    0.78
  -4   5  -2    2.26    1.57
   4   5   2    3.44    0.82
   5  -5   2    4.58    1.23
  -5  -5  -2    3.22    1.73
  -5  -5  -2    3.81    0.62
   5  -5   2    3.90    0.73
   5   5  -2    5.09    0.90
  -5  -5  -2    3.77    0.59
  -5  -5  -2   -0.54    1.96
  -5  -5  -2    3.60    0.73
  -5   5   2    4.07    0.76
   5   5  -2    1.52    1.85
   5   5  -2    1.06    3.45
  -5   5   2    4.13    0.68
  -5  -5  -2    1.68    1.40
   5   5  -2    2.53    0.85
   5  -5  -2    3.46    0.60
  -5  -5   2    3.41    0.66
   5   5   2    4.25    1.08
   5   5   2    0.11    1.71
   5  -5  -2    3.43    1.12
  -5   5  -2    3.42    0.75
  -5  -5   2    3.50    0.74
   5  -5  -2    4.36    0.73
  -5   5  -2    1.28    1.53
   5   5   2    3.73    0.98
   6   5  -2    3.92    0.90
   6   5  -2    1.60    2.93
  -6   5   2    4.59    0.63
   6  -5   2    5.47    1.01
   6  -5   2    5.98    1.21
  -6  -5  -2    5.15    0.94
  -6  -5  -2    3.74    0.57
   6   5  -2    4.73    1.22
  -6  -5  -2    0.74    1.79
  -6   5   2    3.79    0.78
  -6   5  -2    4.53    0.85
  -6  -5   2    5.15    0.91
   6   5   2    5.40    1.12
   6   5   2    3.19    0.99
  -6  -5   2    3.16    2.06
  -6  -5   2    4.51    0.85
   6   5   2   -0.09    2.15
   6  -5  -2    0.78    2.30
   6  -5  -2    5.98    1.35
   7   5  -2    2.43    1.01
   7  -5   2    2.01    0.84
   7   5  -2    1.26    0.81
   7  -5   2    1.75    0.82
   7   5   2    0.64    0.90
   7   5   2    0.48    0.89
   7  -5  -2    2.75    1.08
   0  -6  -2   44.77    1.36
   0   6  -2   45.12    1.61
   0   6  -2   46.01    1.23
   0  -6   2   54.93    4.51
   0   6  -2   45.88    1.73
   0  -6  -2   47.50    1.34
   0   6   2   45.62    1.76
   0  -6   2   44.72    1.16
   0  -6  -2   40.94    1.75
   0  -6  -2   45.00    1.64
   0  -6   2   45.47    1.67
   0   6  -2   44.75    1.58
   1   6  -2    8.02    0.61
  -1  -6  -2    8.98    0.79
   1  -6   2    9.33    0.75
   1  -6   2    9.42    0.72
  -1   6   2    9.19    0.82
  -1  -6  -2    9.12    0.75
  -1   6   2    8.14    0.66
   1   6  -2    7.43    0.69
  -1  -6  -2    9.79    0.81
   1  -6   2    8.87    0.68
   1   6  -2    8.95    0.71
   1   6   2    9.90    0.77
  -1   6  -2    8.19    0.71
   1  -6  -2    9.41    0.39
   1  -6  -2    8.26    0.63
  -1   6  -2    8.17    0.62
  -1   6  -2    8.43    0.69
   1  -6  -2    8.77    0.76
  -1  -6   2    9.12    0.80
   1   6   2    8.70    0.78
  -1   6  -2    8.69    0.76
  -1  -6   2    8.79    0.77
   1  -6  -2    9.03    0.75
  -1  -6   2    8.46    0.79
   2  -6   2    4.15    0.41
   2  -6   2    4.23    0.70
   2   6  -2   10.73    3.43
   2   6  -2   13.31    4.84
  -2   6   2    4.07    0.65
  -2  -6  -2    3.74    0.61
  -2  -6  -2    7.91    3.09
  -2   6   2    7.02    2.93
   2  -6   2    4.25    0.51
   2   6  -2    3.60    0.64
  -2   6   2    4.02    0.64
   2   6  -2    3.81    0.26
   2   6  -2    3.92    0.38
  -2  -6  -2    3.85    0.68
  -2   6   2    5.98    2.55
   2   6  -2    7.17    4.26
   2  -6   2    4.40    0.43
   2  -6   2   14.24    5.12
   2   6  -2    6.74    2.61
  -2  -6  -2   10.83    5.15
  -2  -6  -2    3.53    0.35
   2   6   2    3.92    0.64
   2  -6  -2    4.00    0.65
   2  -6  -2    6.41    3.06
   2   6   2    4.39    0.42
   2  -6  -2    3.86    0.65
  -2  -6   2    7.42    3.68
  -2   6  -2    3.43    1.44
  -2  -6   2    3.96    0.60
   2  -6  -2    3.77    0.68
   2   6   2   14.96    5.54
   2   6   2    9.93    3.36
  -2   6  -2    5.93    3.39
  -2   6  -2    3.73    0.63
   2   6   2    3.57    0.59
  -2   6  -2    3.77    0.40
   2  -6  -2    0.95    3.02
  -2  -6   2    6.06    2.13
  -2   6  -2    4.94    0.66
   2   6   2    3.96    0.73
  -2  -6   2    3.76    0.69
  -2   6  -2    3.59    0.64
  -3   6   2    6.59    2.07
   3  -6   2    2.60    0.68
   3  -6   2    3.66    0.57
  -3  -6  -2    3.66    0.44
  -3  -6  -2    8.35    3.21
   3  -6   2    3.28    0.54
  -3   6   2    3.33    0.61
   3   6  -2    3.07    0.21
  -3  -6  -2    3.17    0.66
  -3   6   2    5.03    1.70
  -3   6   2    2.91    0.60
   3   6  -2    2.62    0.63
   3   6  -2    3.24    0.39
   3   6  -2    3.24    0.21
   3   6  -2    9.07    3.46
  -3  -6  -2    3.18    0.58
   3  -6   2    3.37    0.28
   3   6  -2    3.12    1.97
   3  -6  -2    3.12    0.55
   3  -6  -2    3.45    0.76
  -3   6  -2    3.16    0.61
  -3   6  -2    3.14    0.27
  -3   6  -2    2.74    1.01
   3  -6  -2    2.73    0.32
  -3   6  -2    3.05    0.59
  -3   6  -2    2.99    0.51
   3  -6  -2    1.06    1.89
   3   6   2    4.09    0.84
  -3  -6   2    3.28    0.65
   3   6   2    2.96    0.29
  -3  -6   2    4.99    1.63
   3   6   2    3.18    0.69
  -3  -6   2    7.33    2.77
  -4  -6  -2   12.34    1.03
   4   6  -2   15.29    1.48
  -4   6   2   14.21    0.77
   4   6  -2   12.78    0.93
  -4  -6  -2   13.09    1.02
   4  -6   2   13.67    1.03
  -4   6   2   12.31    0.97
  -4   6   2   11.91    1.06
   4  -6   2   13.66    0.88
   4  -6   2   15.43    1.45
  -4  -6  -2   15.43    1.26
  -4  -6   2    7.86    2.86
  -4  -6   2   14.23    1.22
  -4   6  -2   13.56    0.85
  -4   6  -2   14.95    1.17
   4   6   2   16.13    1.47
   4  -6  -2   12.82    1.01
   4   6   2   14.09    1.37
   4  -6  -2   13.42    0.84
   4  -6  -2   15.13    1.47
   5   6  -2   -0.27    0.33
  -5  -6  -2    0.15    0.29
   5   6  -2    0.16    0.45
  -5   6   2    0.26    0.32
  -5  -6  -2    0.70    0.96
  -5   6   2    0.43    0.31
  -5  -6  -2    1.01    1.21
   5  -6   2   -0.50    0.34
   5  -6   2   -0.33    0.21
   5  -6   2    0.04    0.38
   5   6  -2    0.98    2.42
  -5   6   2    0.13    0.30
   5   6   2   -0.29    0.37
  -5   6  -2   -0.06    0.30
   5  -6  -2    0.33    2.88
  -5  -6   2    0.41    0.33
  -5   6  -2    0.26    0.17
   5  -6  -2   -0.05    0.23
  -5  -6   2   -1.05    1.50
  -5  -6   2   -0.57    0.24
  -5   6  -2   -1.46    1.07
   5   6   2    0.23    1.73
  -5  -6   2   -0.08    0.61
   5  -6  -2   -0.82    0.27
  -6  -6  -2   -0.88    1.50
   6   6  -2   -0.87    2.73
  -6  -6  -2    0.11    0.38
   6   6  -2   -0.58    0.49
  -6   6   2    0.51    0.45
  -6   6   2   -0.28    0.26
   6   6  -2   -0.35    0.43
   6  -6   2    0.36    0.42
  -6  -6  -2    0.31    0.35
   6  -6   2    0.36    0.47
  -6  -6  -2   -0.96    1.07
  -6  -6   2   -0.20    0.44
  -6  -6   2   -0.33    0.50
   6   6   2    0.31    0.56
  -6  -6   2    1.85    2.34
   6  -6  -2   -0.90    0.47
  -6   6  -2   -0.06    0.40
  -6  -6   2   -0.19    0.38
   6   6   2   -1.35    2.59
   6   6   2   -0.58    0.45
   7  -6   2    3.46    1.03
   7   6  -2    2.89    5.34
   7   6  -2    3.21    1.12
   7  -6   2    2.35    0.97
   7   6   2    2.03    0.86
   7  -6  -2    1.16    0.76
   7   6   2    3.21    1.12
   0  -7   2    0.97    0.35
   0  -7  -2    1.86    1.51
   0   7  -2    0.89    0.31
   0  -7  -2    1.37    2.25
   0   7  -2    0.66    0.31
   0  -7   2    0.47    0.30
   0   7  -2    0.72    0.20
   0  -7  -2    1.12    0.29
   0  -7   2    0.87    0.75
   0   7  -2    0.77    0.32
   0   7   2    2.07    1.86
   0  -7   2    1.57    2.08
   0   7  -2    0.56    1.98
   0  -7   2    0.86    0.21
   0  -7  -2    0.41    0.29
   0  -7  -2    0.90    0.31
   0   7   2    1.05    0.38
   0   7  -2    1.55    1.23
   0   7   2    3.54    3.21
   0  -7  -2    0.66    0.25
   0   7   2    1.87    3.35
  -1  -7  -2   10.05    3.52
  -1   7   2   10.94    4.27
   1   7  -2   12.56    4.74
   1  -7   2    7.13    0.71
  -1   7   2    1.32    3.63
  -1  -7  -2    7.16    0.74
  -1   7   2    7.38    0.65
   1   7  -2    8.60    0.73
   1  -7   2    9.39    0.74
  -1  -7  -2    8.44    0.74
  -1  -7  -2   11.58    4.70
   1  -7   2   17.84    5.83
  -1  -7  -2    7.67    0.38
   1   7  -2    6.67    0.60
   1  -7   2    8.52    0.69
  -1   7   2   11.99    3.72
   1   7  -2    9.46    3.23
  -1  -7  -2    7.46    0.79
  -1   7   2    7.58    0.78
  -1  -7   2    8.55    0.80
   1   7   2    7.98    0.72
  -1  -7   2    8.43    0.82
   1  -7  -2    4.17    1.84
   1   7   2    9.82    3.75
  -1   7  -2    6.41    2.32
  -1  -7   2    6.38    2.14
  -1   7  -2    7.39    0.68
  -1   7  -2    8.16    0.78
  -1  -7   2    8.43    4.02
   1  -7  -2    7.22    0.75
   1  -7  -2    8.10    0.43
  -1  -7   2    7.57    0.73
   1   7   2   17.05    5.99
   1   7   2    7.65    0.78
  -1   7  -2    9.42    0.83
  -1   7  -2    8.32    0.67
  -1   7  -2   11.39    4.00
   1  -7  -2    8.25    0.75
   1  -7  -2    8.31    0.69
   1  -7  -2    9.91    3.89
   2   7  -2   10.12    4.51
  -2   7   2    4.32    0.71
  -2  -7  -2    5.66    3.59
   2   7  -2    3.35    0.39
  -2   7   2    4.94    3.16
  -2  -7  -2    3.56    0.70
   2  -7   2    7.76    4.27
  -2  -7  -2    7.86    3.37
   2   7  -2    5.50    2.53
   2  -7   2    3.61    0.62
   2  -7   2    4.01    0.45
  -2  -7  -2    3.75    0.32
   2  -7   2    3.14    0.37
   2   7  -2    3.34    0.65
   2  -7   2    4.62    0.78
  -2   7   2    3.60    0.64
  -2  -7   2    3.68    0.68
  -2   7  -2    4.02    0.43
   2  -7  -2    5.01    0.81
  -2   7  -2    3.56    0.62
   2   7   2    3.47    0.50
  -2  -7   2    3.55    1.92
   2   7   2    2.75    0.58
  -2  -7   2    6.01    3.90
   2  -7  -2    3.62    0.41
   2   7   2    7.52    3.22
   2  -7  -2    5.17    0.81
  -2   7  -2    2.48    2.72
  -2   7  -2    3.28    0.60
   2   7   2    3.92    0.71
   2  -7  -2    6.88    3.59
   2   7   2    3.70    0.67
   3   7  -2    3.94    0.82
  -3   7   2    3.64    0.67
   3   7  -2    2.93    1.94
  -3  -7  -2    3.84    0.77
   3  -7   2    4.39    0.39
   3  -7   2    4.22    0.85
  -3   7   2    1.88    0.94
  -3   7   2    4.68    0.77
   3   7  -2    3.69    0.32
   3  -7   2    3.73    0.56
   3  -7   2    4.69    0.70
  -3  -7  -2    1.72    1.31
  -3  -7  -2    4.49    0.47
   3   7   2    3.52    0.75
   3  -7  -2    4.14    0.30
   3   7   2    4.07    0.37
   3  -7  -2    4.52    0.32
  -3  -7   2    3.33    0.72
  -3   7  -2    3.83    0.66
  -3   7  -2    2.70    0.32
   3  -7  -2    2.87    1.53
   3   7   2    3.66    0.38
  -3   7  -2    4.75    0.58
   3   7   2    3.21    0.75
  -3   7  -2    4.86    0.82
   3  -7  -2    3.93    0.82
  -4  -7  -2    9.73    3.06
  -4   7   2   16.10    1.28
  -4  -7  -2   14.92    1.34
   4  -7   2   12.99    0.97
   4  -7   2   16.33    1.12
   4  -7   2   14.04    1.44
   4   7  -2   14.94    0.91
  -4  -7  -2    8.19    3.19
   4   7  -2   16.24    1.57
  -4   7   2   15.73    1.16
  -4  -7  -2   14.28    1.01
  -4  -7   2   15.31    1.32
  -4   7  -2   14.92    0.97
   4  -7  -2   17.14    1.61
   4  -7  -2   15.25    0.81
   4   7   2   15.43    1.51
   4   7   2   13.74    1.41
  -4   7  -2   14.74    1.25
   5   7  -2    1.15    0.67
   5   7  -2    0.97    0.38
  -5   7   2    0.58    0.34
  -5  -7  -2    0.62    1.70
   5  -7   2   -0.34    0.63
   5  -7   2    1.64    0.78
  -5  -7  -2    1.78    1.55
   5   7  -2   -2.10    1.87
  -5   7   2    0.20    0.40
  -5  -7  -2    1.34    0.59
   5   7   2   -0.19    1.77
   5   7   2    1.18    0.63
  -5   7  -2    0.86    0.51
   5  -7  -2    1.12    2.51
  -5   7  -2   -1.20    1.33
  -5  -7   2    0.53    0.42
   5  -7  -2    0.55    0.52
  -5  -7   2    0.83    0.94
  -5  -7   2    0.68    2.02
   5  -7  -2    0.73    0.34
  -5   7  -2    1.40    0.31
   5   7   2    1.54    0.66
   6   7  -2    1.23    2.49
  -6  -7  -2    0.57    0.56
  -6   7   2    0.38    0.49
   6  -7   2    0.91    0.49
  -6  -7  -2    0.77    1.22
  -6  -7  -2    0.44    2.00
   6  -7   2   -0.37    0.55
  -6   7   2    0.49    0.33
   6   7  -2    0.39    0.57
   6   7   2    0.27    0.55
  -6   7  -2    1.00    0.51
  -6  -7   2    0.80    0.80
   6  -7  -2   -0.33    0.54
   6   7   2   -0.14    2.84
  -6  -7   2   -0.04    0.43
  -6  -7   2    0.54    2.04
   6   7   2    1.33    0.74
  -7  -7  -2   -0.39    0.52
   7   7   2    1.55    1.05
  -7  -7   2   -0.41    0.75
   0  -8  -2    5.43    2.55
   0  -8  -2   11.59    0.70
   0  -8   2    9.93    0.88
   0  -8   2   11.12    0.60
   0  -8  -2    7.34    4.07
   0   8  -2   10.59    0.61
   0  -8  -2   11.12    0.74
   0   8  -2   10.67    0.98
   0  -8   2    6.82    3.88
   0   8  -2   10.97    0.89
   0   8   2   10.58    0.96
   0   8  -2   10.49    0.93
   0  -8  -2   10.96    0.91
   1   8  -2   11.07    0.86
   1   8  -2   11.11    0.83
  -1   8   2   17.10    5.72
  -1  -8  -2   12.00    1.03
   1  -8   2   11.48    0.86
  -1  -8  -2   12.56    0.94
  -1  -8  -2   11.30    0.48
  -1   8   2   13.18    1.08
   1  -8   2   11.78    0.89
  -1   8   2   -0.78    7.16
  -1  -8   2   12.07    1.11
  -1   8  -2   10.31    0.79
   1  -8  -2   11.65    0.58
  -1  -8   2   14.81    2.99
   1  -8  -2   10.79    0.88
   1  -8  -2   11.82    0.87
   1  -8  -2   16.90    3.17
   1   8   2   11.35    0.90
  -1   8  -2   11.52    0.85
  -1   8  -2   10.77    0.96
  -1   8  -2   10.64    0.93
   1   8   2   11.50    1.02
  -1  -8   2   11.47    1.01
   2  -8   2    5.35    0.47
   2   8  -2    4.81    0.81
  -2   8   2    3.79    0.71
  -2  -8  -2    4.54    2.19
   2  -8   2    5.77    0.88
  -2   8   2    4.21    0.76
   2   8  -2    6.16    2.18
   2   8  -2    4.92    0.53
   2  -8   2    5.53    0.56
   2   8  -2    6.85    1.97
  -2  -8  -2    5.02    0.29
  -2  -8  -2    4.87    0.83
   2  -8   2    7.11    3.06
  -2   8   2    3.81    2.03
   2   8   2    6.22    1.24
  -2   8  -2    5.21    0.85
  -2  -8   2    4.56    2.36
  -2  -8   2    4.12    1.67
  -2  -8   2    5.23    0.87
   2   8   2    5.99    2.33
  -2   8  -2    5.08    0.53
   2  -8  -2    4.36    0.52
  -2   8  -2    5.30    0.78
   2  -8  -2    5.07    0.83
   2   8   2    4.90    1.21
   2  -8  -2    7.00    2.74
   2   8   2    6.32    0.92
   2   8   2    5.44    0.85
   3  -8   2    7.87    3.16
   3  -8   2   15.10    1.33
  -3   8   2   10.59    1.03
   3   8  -2   12.71    0.66
  -3  -8  -2   12.45    0.67
   3   8  -2    9.64    2.42
  -3  -8  -2    7.31    3.27
   3   8  -2   12.57    3.50
   3   8  -2   11.26    1.19
   3  -8   2   11.46    0.79
   3  -8   2   11.09    0.67
  -3  -8  -2    8.43    2.88
  -3   8   2   10.72    1.02
   3   8  -2   12.61    2.39
  -3  -8  -2   13.35    1.19
  -3   8  -2   11.93    0.98
   3   8   2   11.41    0.72
   3   8   2   11.58    0.69
  -3  -8   2    9.20    3.35
  -3  -8   2   12.46    1.20
   3  -8  -2   13.15    1.29
   3  -8  -2   12.82    3.72
   3   8   2   11.09    1.17
   3   8   2    9.96    1.12
  -3   8  -2   11.54    1.10
   3  -8  -2   10.84    0.90
   3   8   2    9.80    2.53
   4   8  -2    2.99    0.80
   4   8  -2    0.39    1.38
   4  -8   2    2.77    0.53
  -4  -8  -2    1.72    2.13
   4  -8   2    3.27    0.90
  -4   8   2    1.87    0.60
  -4   8   2    3.38    0.86
  -4   8   2    3.28    2.14
  -4  -8  -2    2.41    0.68
  -4  -8  -2    1.78    1.58
   4  -8   2    2.59    0.55
   4  -8  -2    2.39    0.45
   4   8   2    1.74    0.69
  -4  -8   2    0.54    0.92
  -4  -8   2    2.50    0.72
  -4   8  -2    3.57    0.64
  -4  -8   2    1.08    1.85
   4   8   2   -0.02    1.21
   4  -8  -2    2.95    0.89
  -4   8  -2    2.00    0.59
   4   8   2    2.44    0.75
  -5  -8  -2    9.26    1.19
   5  -8   2    7.70    1.42
   5  -8   2    8.92    0.92
   5   8  -2    9.00    1.57
  -5   8   2    9.09    1.03
  -5   8   2   11.42    1.22
  -5   8  -2    7.97    0.75
  -5   8  -2   11.35    1.16
   5   8   2    8.00    1.47
  -5  -8   2   10.28    1.11
   5   8   2    9.84    1.62
   5  -8  -2    8.26    1.49
   6   8  -2    1.43    0.76
   6  -8   2    0.96    0.59
  -6  -8  -2    1.02    1.96
   6   8  -2    0.38    2.90
  -6  -8  -2    1.44    0.66
  -6  -8  -2    0.53    1.41
  -6   8   2    1.12    0.68
  -6  -8  -2    1.60    0.62
   6  -8   2    2.02    0.76
  -6  -8   2    2.21    2.71
   6   8   2    2.18    0.80
  -6  -8   2    1.10    0.99
   6  -8  -2    1.58    0.91
   6   8   2    1.01    0.71
  -6   8  -2    3.09    0.90
  -6  -8   2    2.13    0.68
  -6  -8   2    2.55    0.65
  -7  -8  -2    3.27    0.91
  -7  -8   2    1.26    0.72
  -7   8  -2    0.06    0.79
   0  -9   2    2.35    3.31
   0   9  -2    2.61    0.60
   0  -9   2    3.56    0.69
   0   9   2    2.98    3.29
   0  -9  -2    2.23    0.40
   0  -9   2    3.07    0.52
   0  -9  -2    1.25    2.24
   0   9  -2    2.50    0.37
   0  -9  -2    2.89    0.50
   0  -9  -2    3.36    0.63
   0  -9  -2    3.33    3.22
  -1  -9  -2    3.77    0.80
   1  -9   2    3.37    0.60
  -1  -9  -2    2.87    0.26
  -1  -9  -2    3.15    0.68
  -1  -9  -2    6.82    4.31
   1  -9   2    5.41    4.40
  -1   9   2    3.75    0.91
   1   9  -2    3.53    0.62
   1   9  -2    3.94    0.65
   1  -9   2    3.47    0.64
   1  -9  -2    2.06    1.45
  -1   9  -2    2.74    0.62
   1  -9  -2    4.32    3.43
   1  -9  -2    2.54    0.54
   1   9   2    4.30    0.82
  -1  -9   2    3.75    0.76
  -1   9  -2    3.12    0.54
  -1   9  -2    3.74    0.75
   1  -9  -2    3.03    0.41
  -1   9  -2    3.67    0.73
   1   9   2    0.96    1.22
   1  -9  -2    2.42    0.52
  -1  -9   2    5.80    4.27
   2   9  -2    3.74    1.83
   2  -9   2    1.76    0.53
   2  -9   2    1.43    0.30
  -2   9   2    1.20    0.42
   2  -9   2    1.88    0.45
  -2  -9  -2    2.94    2.16
   2  -9   2    6.49    3.00
   2   9  -2    2.92    0.69
   2   9  -2    2.62    0.51
  -2  -9  -2    1.94    0.62
  -2   9   2    2.12    0.60
   2   9   2    2.04    0.59
   2   9   2    2.40    0.59
   2   9   2    4.65    2.39
   2   9   2    1.16    0.43
   2   9   2    1.59    0.39
  -2   9  -2    1.65    0.43
  -2   9  -2    1.94    0.61
   2  -9  -2    1.97    0.46
  -2  -9   2    3.07    2.49
  -2   9  -2    1.89    0.51
  -2  -9   2    2.29    0.62
   2  -9  -2    2.45    0.68
   2  -9  -2    3.65    2.00
   3  -9   2    0.07    1.33
   3   9  -2    0.43    0.51
  -3  -9  -2    1.10    2.23
  -3   9   2    1.33    0.51
   3  -9   2    0.50    0.24
  -3   9   2    1.22    0.48
  -3  -9  -2    0.97    0.51
  -3  -9  -2    0.59    0.18
   3   9  -2    0.06    1.46
   3   9  -2    0.54    0.24
   3   9  -2   -0.02    1.18
  -3  -9  -2   -0.08    0.73
   3  -9   2    0.46    0.26
  -3   9   2   -0.62    2.50
   3  -9   2   -0.06    0.33
   3   9  -2    0.10    0.93
   3  -9  -2    0.96    1.49
   3  -9  -2    0.77    0.24
  -3  -9   2    0.51    0.74
  -3   9  -2    0.83    0.38
  -3  -9   2   -0.22    1.68
  -3   9  -2    0.60    0.36
  -3  -9   2    1.07    0.49
   3   9   2    0.61    0.44
   3  -9  -2    0.74    0.41
   3   9   2    0.63    0.25
   3   9   2   -0.79    0.76
   3   9   2    1.17    0.30
   3   9   2    0.09    1.34
   3   9   2    0.94    0.40
  -4   9   2    1.35    1.95
  -4  -9  -2    1.03    0.32
  -4  -9  -2    1.16    0.57
   4   9  -2   -0.11    1.80
   4   9  -2    0.47    0.46
   4  -9   2    1.30    0.65
  -4  -9  -2    5.33    2.50
  -4   9   2    1.17    0.57
  -4   9   2    1.73    0.54
   4  -9   2    1.94    0.46
  -4  -9  -2    1.11    1.32
   4   9   2    1.55    0.22
  -4  -9   2    1.90    0.66
   4   9   2    1.77    0.24
   4  -9  -2    1.61    0.71
  -4  -9   2    1.88    2.14
   4   9   2    0.46    1.22
   4  -9  -2   -0.80    1.36
   4   9   2    2.15    0.66
  -4   9  -2    1.99    0.52
  -4   9  -2    1.52    0.56
   4   9   2    1.58    0.61
   5  -9   2    3.79    0.99
  -5  -9  -2    0.54    2.18
  -5   9   2    1.20    0.54
   5   9  -2    2.61    0.98
  -5   9   2    3.89    0.78
   5  -9   2    2.57    0.61
  -5  -9  -2    0.33    1.15
   5   9  -2    2.39    2.39
  -5  -9   2    1.29    2.32
   5   9   2    2.15    0.84
  -5  -9   2    0.12    0.82
   5   9   2    2.45    0.75
   5   9   2    1.30    1.57
   5  -9  -2    1.84    0.81
  -5   9  -2    2.68    0.78
  -5   9  -2    1.32    0.44
  -6   9   2    6.07    1.22
  -6  -9  -2    2.86    3.22
   6   9  -2    2.31    3.35
  -6  -9  -2    6.20    1.21
  -6  -9   2    7.01    1.22
  -6   9  -2    4.45    0.94
  -6  -9   2    5.76    0.99
   6   9   2    3.80    1.27
  -7  -9  -2    4.52    1.05
  -7  -9   2    2.57    0.87
  -7   9  -2    2.54    0.90
   0  10  -2    3.70    0.39
   0 -10  -2    4.71    0.76
   0  10  -2    3.90    0.80
   0 -10   2    4.39    0.84
   0 -10  -2    1.42    1.12
   0 -10  -2    4.26    0.58
   0 -10   2    4.15    0.66
   0 -10   2    0.26    1.64
   0  10  -2    3.66    0.68
   0 -10  -2    4.26    0.82
   0  10   2    3.50    0.79
   0 -10  -2    2.43    1.96
   1 -10   2   29.09    5.49
   1  10  -2   25.20    1.46
   1 -10   2   25.50    1.49
   1 -10   2   26.94    1.37
  -1 -10  -2   22.78    4.56
  -1  10   2   25.67    1.59
  -1  10   2   29.93    1.80
  -1 -10  -2   27.92    1.73
  -1 -10  -2   25.04    4.10
  -1 -10  -2   27.04    0.73
   1  10  -2   28.12    1.50
  -1  10  -2   27.87    1.66
   1  10   2   25.66    1.68
   1 -10  -2   27.40    1.52
  -1  10  -2   25.17    1.30
   1  10   2   28.45    1.53
  -1 -10   2   24.48    5.07
   1 -10  -2   26.68    1.05
   1 -10  -2   26.99    1.45
   1 -10  -2   31.23    5.02
   1  10   2   26.39    1.47
   1 -10  -2   19.48    2.99
  -1  10  -2   28.07    1.68
  -1 -10   2   28.93    1.79
   2 -10   2    1.79    1.37
  -2 -10  -2   -0.65    1.62
  -2  10   2    2.14    0.63
   2 -10   2    3.07    0.61
  -2 -10  -2    2.03    0.64
  -2  10   2    2.04    0.63
   2 -10   2    2.48    0.63
   2  10  -2    2.16    0.60
   2 -10   2    2.28    0.39
   2  10  -2    2.43    0.53
  -2 -10  -2    0.33    0.99
   2 -10  -2    2.84    0.73
   2  10   2    2.32    0.60
  -2 -10   2    0.61    0.86
   2 -10  -2    2.63    0.54
  -2  10  -2    3.29    0.73
  -2 -10   2    0.07    1.83
  -2  10  -2    2.25    0.64
   2  10   2    2.48    0.54
  -2 -10   2    1.63    0.57
  -2  10  -2    3.14    0.58
   2  10   2    1.82    0.61
   3  10  -2   19.46    1.03
  -3 -10  -2   11.12    4.31
   3  10  -2   12.48    3.64
  -3 -10  -2   22.16    1.76
  -3  10   2   22.17    1.64
   3  10  -2   19.84    1.64
   3 -10   2   20.50    1.66
  -3  10   2   23.48    1.64
   3 -10   2   20.34    1.02
   3 -10   2   14.37    4.97
   3  10  -2   13.52    3.70
   3 -10   2   21.81    1.13
   3  10  -2   17.38    3.35
  -3 -10  -2   12.59    3.85
  -3 -10   2   12.36    4.46
   3 -10  -2   21.43    1.71
  -3 -10   2   22.65    1.75
   3  10   2   19.95    1.11
   3  10   2   20.36    1.06
   3  10   2   18.43    1.55
   3  10   2   21.08    1.67
   3 -10  -2   14.78    4.54
   3 -10  -2   20.72    1.04
  -3  10  -2   19.98    1.57
   3  10   2   15.04    4.08
  -3  10  -2   22.00    1.47
  -4  10   2    8.98    1.08
   4 -10   2    7.66    0.72
   4 -10   2    7.93    1.39
  -4 -10  -2    5.72    2.97
   4 -10   2    7.99    0.42
  -4  10   2    8.17    1.21
  -4 -10  -2    7.39    1.19
   4  10  -2    7.70    1.37
  -4  10  -2    8.49    1.28
   4 -10  -2    6.02    1.41
   4  10   2    7.73    0.54
   4  10   2    6.23    1.22
  -4  10  -2    9.71    0.99
   4  10   2    8.26    0.59
  -4 -10   2    8.45    1.34
   4  10   2    6.45    1.17
  -4 -10   2    4.03    2.90
   5 -10   2    3.15    0.86
   5 -10   2    2.63    0.65
  -5 -10  -2    4.11    0.98
  -5 -10  -2    0.55    2.06
   5  10  -2   -1.02    2.50
  -5  10   2    4.61    0.95
  -5 -10  -2    0.18    1.96
  -5  10   2    2.32    0.68
   5  10  -2    3.64    0.99
  -5 -10   2    3.06    0.95
   5 -10  -2    4.86    1.13
   5  10   2    4.37    1.03
  -5 -10   2    2.05    3.00
  -5  10  -2    4.09    1.01
   6 -10   2    2.39    0.84
   6  10  -2    1.98    0.97
  -6 -10  -2    3.66    1.00
  -6  10   2    2.15    0.79
  -6 -10  -2   -0.96    1.49
  -6 -10  -2   -0.38    2.73
  -6  10  -2    2.06    0.78
  -6 -10   2    1.91    3.40
  -6 -10   2    2.19    0.75
   6  10   2    3.84    1.11
  -6 -10   2    0.12    1.16
  -6 -10   2    2.15    0.66
   6 -10  -2    1.27    0.89
  -7 -10  -2   -1.04    0.58
  -7  10   2    1.46    1.01
  -7  10  -2   -0.92    0.77
   0 -11  -2    7.80    2.65
   0  11   2   14.54    1.32
   0 -11  -2   13.61    4.42
   0 -11  -2   14.21    1.22
   0 -11   2   20.22    5.91
   0  11  -2   12.38    1.14
   0 -11  -2   14.80    0.87
   0 -11  -2   15.01    1.01
   0  11   2   12.23    1.12
   0 -11   2   13.47    1.21
   0 -11   2    8.20    2.37
   0  11  -2   15.73    1.33
  -1  11   2    1.15    0.49
   1 -11   2    1.50    0.45
   1  11  -2    1.24    0.49
   1  11  -2    1.37    0.50
   1 -11   2    1.23    0.51
  -1  11   2    1.94    0.59
  -1 -11  -2    1.78    1.56
  -1 -11  -2    0.81    0.49
  -1 -11  -2    3.48    2.53
   1 -11   2    0.57    1.63
   1 -11  -2    1.51    0.35
   1  11   2    1.54    0.53
   1 -11  -2    1.70    0.51
  -1 -11   2    0.53    0.79
   1 -11  -2    1.30    0.43
  -1 -11   2    0.26    2.06
   1 -11  -2    1.93    2.07
   1  11   2    1.17    0.47
  -1 -11   2    1.23    0.57
   1  11   2    0.56    0.44
  -1  11  -2    0.54    0.39
   1  11   2    0.10    1.35
   1 -11  -2    1.35    1.10
  -1  11  -2    1.12    0.38
  -1  11  -2    0.96    0.41
   2  11  -2   30.54    1.56
  -2  11   2   32.87    1.99
  -2 -11  -2   33.47    2.10
  -2  11   2   31.92    1.97
  -2 -11  -2   21.22    6.03
   2 -11   2   25.56    6.92
   2  11  -2   30.03    1.89
   2 -11   2   35.18    1.72
   2 -11   2   32.58    1.82
   2 -11  -2   23.12    4.97
   2 -11  -2   33.47    1.66
   2  11   2   34.77    1.67
  -2  11  -2   30.49    1.92
  -2  11  -2   32.65    1.94
   2  11   2   33.10    1.94
   2 -11  -2   31.12    1.86
  -2 -11   2   35.45    2.16
  -2 -11   2   22.26    6.13
  -3  11   2    0.92    0.52
   3  11  -2    0.53    1.76
   3  11  -2    0.55    0.37
   3 -11   2    0.97    0.30
   3 -11   2    1.10    0.45
   3  11  -2    0.33    1.38
  -3  11   2    1.15    0.55
  -3 -11  -2    0.78    0.42
   3  11  -2   -0.14    1.40
   3 -11   2    1.11    0.61
   3 -11   2    5.34    3.07
  -3 -11  -2   -2.67    1.80
   3  11  -2    1.31    0.66
  -3 -11  -2    0.46    1.04
  -3 -11   2    0.97    0.61
   3  11   2    0.99    0.47
  -3  11  -2    0.47    0.43
  -3  11  -2    0.78    0.41
   3  11   2    0.17    2.06
   3  11   2    0.48    1.28
  -3 -11   2    1.00    1.08
  -3 -11   2    1.42    2.16
   3  11   2    0.60    0.36
   3 -11  -2    0.53    0.53
   3 -11  -2    1.30    0.39
   3 -11  -2    1.40    2.05
  -4 -11  -2    4.23    3.01
   4  11  -2    6.78    0.58
   4  11  -2    5.42    1.13
   4 -11   2    6.41    1.20
  -4  11   2    7.11    1.16
  -4 -11  -2    5.65    1.22
  -4  11   2    7.35    1.16
   4 -11   2    2.48    2.39
   4 -11   2    7.03    0.67
  -4 -11  -2    4.60    2.33
   4  11   2    8.15    0.62
   4  11   2    6.99    1.31
   4 -11  -2    7.94    1.49
  -4 -11   2    4.12    3.51
  -4 -11   2    7.45    1.36
  -4  11  -2    6.73    1.15
  -4  11  -2    5.38    0.92
   4  11   2    6.10    0.53
  -5 -11  -2    2.26    2.04
  -5 -11  -2    6.07    1.26
   5  11  -2   -0.88    3.70
   5  11  -2    5.85    1.29
   5 -11   2    5.26    1.19
  -5 -11  -2    1.61    2.68
  -5  11   2    6.82    1.08
  -5  11   2    5.15    1.13
   5 -11  -2    3.98    1.03
  -5  11  -2    6.76    1.29
   5  11   2    7.14    1.35
  -5 -11   2    5.49    1.15
  -6  11   2   -0.62    0.49
   6 -11   2   -1.05    0.59
  -6 -11  -2    1.20    3.06
   6  11  -2    0.49    0.64
  -6 -11  -2    0.64    0.63
  -6 -11   2   -0.85    0.57
  -6 -11   2    3.83    3.52
  -6  11  -2    0.23    0.53
   6  11   2    0.17    0.58
   6 -11  -2    1.47    0.83
  -7  11   2    2.34    1.13
  -7 -11  -2    0.66    0.84
  -7  11  -2    1.61    1.03
  -7 -11   2    2.58    1.04
   0  12  -2   36.22    1.75
   0 -12  -2   40.66    2.17
   0  12   2   34.51    2.15
   0  12   2   37.23    2.02
   0 -12   2   22.48    6.56
   0 -12   2   36.84    2.12
   0 -12  -2   34.48    1.68
   0 -12  -2   25.94    5.43
   0  12  -2   38.02    2.05
   0 -12  -2   37.07    1.43
   1 -12   2   17.37    5.95
   1 -12   2   21.73    1.24
  -1 -12  -2   13.85    4.80
   1  12  -2   21.04    1.48
   1  12  -2   20.05    1.42
  -1 -12  -2   20.65    1.64
  -1  12   2   22.38    1.64
   1 -12   2   20.57    1.25
   1 -12   2   19.92    1.47
  -1  12   2   22.22    1.73
  -1  12  -2   20.03    1.31
  -1  12  -2   23.07    1.68
   1  12   2   19.51    1.44
   1  12   2   21.31    1.70
  -1 -12   2   20.75    1.67
  -1 -12   2   13.10    4.83
   1 -12  -2   19.95    1.47
   1 -12  -2   22.25    1.05
   1 -12  -2   22.28    1.39
  -1  12  -2   20.94    1.63
   1  12   2   23.16    1.53
   1 -12  -2   15.19    5.24
  -2  12   2    1.36    0.55
  -2  12   2    1.03    0.48
   2  12  -2    1.98    0.56
  -2 -12  -2    1.56    0.55
   2 -12   2    1.74    0.51
   2 -12   2   -1.39    1.84
  -2 -12  -2    2.10    2.58
  -2 -12  -2   -0.19    1.24
   2 -12   2    1.33    0.51
   2  12  -2    1.32    0.54
   2 -12  -2    1.60    0.60
  -2 -12   2    0.66    2.02
  -2 -12   2    0.58    1.09
   2  12   2    0.21    1.67
   2 -12  -2    1.74    0.53
   2  12   2    1.42    0.59
  -2  12  -2    1.50    0.63
  -2 -12   2    1.65    0.63
   2  12   2    0.49    0.38
   2 -12  -2    1.50    2.36
  -2  12  -2    2.52    0.72
  -3 -12  -2    1.68    1.58
   3 -12   2    1.80    0.69
   3  12  -2    2.36    1.93
   3 -12   2    2.01    3.21
   3 -12   2    1.77    0.36
   3  12  -2    1.60    0.44
  -3  12   2    0.37    0.53
  -3 -12  -2    1.89    2.29
  -3  12   2    1.07    0.58
  -3 -12  -2    1.25    0.59
   3  12  -2    1.68    2.06
   3 -12   2    1.22    0.42
   3  12   2    1.98    0.54
   3 -12  -2    2.16    0.49
  -3  12  -2    0.96    0.56
   3 -12  -2    1.54    0.60
  -3  12  -2    1.32    0.70
   3 -12  -2    2.70    2.62
   3  12   2    0.79    0.49
  -3 -12   2    0.23    2.14
   3  12   2    2.15    1.60
  -3 -12   2    0.78    1.14
  -3 -12   2    2.87    0.92
   4 -12   2    9.29    1.51
  -4 -12  -2   11.73    1.75
   4 -12   2   13.28    0.81
   4  12  -2   14.04    1.64
   4 -12   2   12.83    0.77
  -4  12   2   13.75    1.35
  -4  12   2   11.70    1.41
   4  12  -2   12.44    0.73
  -4  12  -2   11.39    1.17
  -4 -12   2   12.92    1.51
   4  12   2   14.36    1.69
  -4  12  -2   11.84    1.40
   4 -12  -2   12.14    1.76
   4  12   2   12.06    0.84
   4 -12  -2    5.98    3.46
   5 -12   2    5.57    1.08
   5  12  -2    2.59    1.03
  -5  12   2    2.92    0.93
   5  12  -2   -0.19    4.83
  -5 -12  -2   -0.28    2.50
  -5  12   2    6.13    1.10
  -5 -12  -2    4.94    1.12
   5 -12  -2    4.25    1.10
  -5  12  -2    4.58    1.14
  -5 -12   2   -0.63    2.77
   5  12   2    4.06    1.20
  -5 -12   2    2.61    1.00
  -6 -12  -2    0.09    0.52
  -6 -12  -2    0.76    1.92
  -6 -12  -2    1.70    3.42
  -6 -12   2   -0.26    0.61
  -6  12  -2    1.18    0.86
  -6 -12   2   -0.23    1.20
  -6 -12   2   -1.37    3.55
   0  13   2    1.21    0.62
   0 -13  -2    1.65    1.34
   0  13  -2    1.26    0.56
   0 -13  -2   -0.66    2.27
   0 -13   2   -0.89    1.73
   0 -13   2    2.57    0.78
   0 -13  -2    0.42    0.26
   0 -13  -2    1.28    0.56
   0  13  -2    1.03    0.46
   0  13   2    1.22    0.53
  -1 -13  -2   29.05    2.04
   1  13  -2   30.64    1.83
   1  13  -2   33.25    1.91
   1 -13   2   29.77    1.90
  -1  13   2   31.43    2.03
   1 -13   2   31.78    1.55
  -1  13   2   30.76    2.14
   1  13   2   28.18    2.02
  -1 -13   2   32.05    2.13
   1 -13  -2   27.93    1.30
   1 -13  -2   30.14    1.65
   1 -13  -2   30.39    1.89
  -1  13  -2   27.42    1.89
  -1  13  -2   29.15    2.04
  -1 -13   2   17.71    6.23
   1  13   2   31.59    1.86
   1  13   2   26.19    1.76
   2 -13   2    3.98    0.85
   2  13  -2    2.76    0.65
   2 -13   2   -1.56    2.88
   2 -13   2    3.44    0.57
  -2  13   2    2.57    0.80
   2 -13   2    2.72    0.71
   2  13  -2    2.70    0.74
  -2 -13  -2    2.07    2.64
  -2  13  -2    1.78    0.64
   2 -13  -2    4.32    0.78
   2  13   2    0.30    2.31
   2 -13  -2    3.26    0.82
   2  13   2    3.35    0.73
  -2 -13   2   -0.15    2.42
   2  13   2    1.59    0.55
   2 -13  -2    0.74    2.55
  -3 -13  -2    4.40    2.57
  -3 -13  -2    3.91    1.03
  -3  13   2    4.19    0.95
   3  13  -2    4.48    2.61
  -3 -13  -2    1.64    2.82
   3 -13   2    2.15    0.75
   3  13  -2    3.25    0.67
   3  13  -2    5.51    2.45
  -3  13   2    3.01    0.81
   3 -13   2    4.02    3.87
   3  13  -2    3.55    0.97
   3 -13   2    2.73    0.48
  -3  13  -2    3.71    1.00
   3  13   2   -1.39    2.04
  -3 -13   2    1.65    1.35
  -3 -13   2    4.18    3.10
   3 -13  -2    1.66    0.65
   3 -13  -2    5.61    3.72
   3  13   2    3.16    0.66
   3  13   2    2.61    1.74
   3  13   2    3.63    0.94
  -3 -13   2    3.74    1.03
   3 -13  -2    2.54    0.65
  -3  13  -2    2.17    0.63
   4  13  -2    9.44    1.65
   4 -13   2   12.82    1.56
  -4  13   2   10.38    1.55
   4  13  -2    3.55    3.38
  -4 -13  -2    9.07    1.56
   4 -13   2    9.87    0.82
   4  13  -2   10.45    0.79
  -4  13   2   12.52    1.98
   4 -13  -2    9.40    0.84
   4  13   2    8.01    0.83
  -4 -13   2    9.33    1.65
   4 -13  -2    3.38    3.27
  -4  13  -2   11.80    1.29
   4  13   2    7.89    1.49
  -4  13  -2   12.22    1.74
   4 -13  -2   10.22    1.67
   5  13  -2    0.30    0.76
  -5 -13  -2   -0.58    1.68
  -5  13   2    0.45    0.56
   5 -13   2   -0.02    0.61
  -5 -13  -2    0.97    0.61
  -5 -13  -2    1.43    2.55
  -5  13   2    1.09    0.66
  -5 -13   2    0.65    1.42
   5  13   2   -0.08    0.62
   5 -13  -2   -0.12    0.64
  -5 -13   2    4.09    3.41
  -5 -13   2   -0.23    0.49
  -5  13  -2   -0.18    0.41
  -6 -13  -2   -0.33    3.14
  -6 -13  -2    3.81    1.27
  -6 -13  -2    1.43    2.20
  -6  13   2    4.26    1.17
  -6 -13   2    5.91    1.19
  -6 -13   2    0.64    4.57
  -6  13  -2    1.44    0.96
   0  14   2    6.69    1.15
   0 -14  -2    6.02    0.60
   0 -14   2    7.20    1.19
   0  14  -2    5.62    0.93
   0  14  -2    6.43    1.16
   0 -14  -2    4.05    3.32
   0 -14  -2    6.44    1.20
   0  14   2    7.30    1.88
   0 -14   2    1.00    2.62
  -1  14   2    5.16    1.71
   1  14  -2    5.02    0.92
   1 -14   2    6.58    0.76
   1 -14   2    1.14    3.64
  -1 -14  -2    5.83    1.76
   1  14  -2    4.53    0.93
   1 -14   2    6.18    1.16
   1 -14  -2    1.56    2.28
   1  14   2    6.13    1.24
   1  14   2    5.69    0.98
   1 -14  -2    6.70    0.79
   1  14   2    4.95    0.96
   1 -14  -2    7.27    1.24
   2 -14   2    0.51    2.79
   2 -14   2    0.96    0.48
   2  14  -2    1.38    0.58
  -2  14   2    2.15    0.82
  -2 -14  -2    4.19    3.37
   2 -14   2    1.76    0.62
  -2 -14  -2    0.53    1.58
   2  14  -2    1.36    0.69
  -2  14   2    1.47    0.70
   2 -14   2    0.90    0.47
  -2 -14  -2    1.52    0.69
   2  14   2    1.36    0.59
  -2  14  -2    0.55    0.52
   2 -14  -2   -0.05    2.48
  -2 -14   2    5.28    3.86
  -2  14  -2    2.32    0.71
  -2 -14   2    1.34    0.76
  -2 -14   2    1.09    1.42
   2 -14  -2    1.43    0.60
   2  14   2    1.30    0.53
   2 -14  -2    1.80    0.57
   3  14  -2   15.02    3.25
   3 -14   2   12.36    0.79
  -3 -14  -2   14.46    1.66
   3 -14   2   14.69    1.23
  -3  14   2   13.56    1.56
   3  14  -2   12.93    1.52
  -3  14   2   12.18    1.44
   3  14  -2   12.94    1.12
   3 -14   2   13.04    1.35
   3 -14  -2   15.20    1.25
   3  14   2   11.37    1.65
  -3 -14   2   13.86    1.61
   3  14   2   11.86    1.13
   3 -14  -2   11.86    1.70
  -3  14  -2   11.38    1.78
   3  14   2    8.90    2.52
  -3  14  -2   14.35    1.54
   4  14  -2    0.65    2.90
   4 -14   2    2.38    3.39
   4 -14   2    0.68    0.65
  -4  14   2    1.92    0.72
  -4 -14  -2    2.37    0.86
  -4 -14  -2    0.14    1.36
   4  14  -2   -0.63    2.06
  -4 -14  -2   -0.33    2.39
  -4  14   2    2.88    0.81
   4  14  -2    1.04    0.75
   4  14   2    0.17    2.33
  -4 -14   2    1.40    3.60
   4  14   2    1.01    0.54
   4  14   2    2.12    0.98
  -4 -14   2    0.23    1.14
  -4 -14   2    0.78    0.76
  -4  14  -2    1.55    0.68
   4 -14  -2    1.64    3.36
   4 -14  -2    1.38    0.65
  -5 -14  -2   -1.59    1.57
  -5 -14  -2    0.89    0.78
   5 -14   2   -0.46    0.56
   5  14  -2   -0.42    0.60
  -5 -14  -2    0.33    3.34
  -5  14   2    0.21    0.66
  -5  14   2   -1.02    0.53
  -5  14  -2   -0.16    0.61
   5  14   2    1.09    0.64
  -5 -14   2   -0.40    1.18
  -5 -14   2    0.43    0.50
  -5 -14   2   -1.92    3.15
   5 -14  -2    0.64    0.69
  -6 -14  -2    1.20    2.59
  -6 -14  -2    1.80    4.06
  -6 -14   2   -1.67    4.45
   0  15  -2    3.58    0.82
   0 -15   2    4.84    4.21
   0  15  -2    4.33    0.97
   0 -15  -2    5.59    4.05
   0 -15   2    2.52    1.30
   0  15   2    2.06    0.67
   0 -15  -2    1.81    1.49
   0 -15  -2    2.65    0.45
   0  15   2    2.74    0.85
  -1  15   2    2.93    0.94
   1  15  -2    3.23    0.73
  -1  15   2    4.18    1.00
   1 -15   2   -0.39    2.16
  -1 -15  -2    3.51    0.98
   1 -15   2    4.89    1.02
   1  15  -2    3.35    0.73
  -1 -15  -2    3.92    3.38
  -1 -15  -2    0.85    1.41
  -1  15  -2    2.80    0.79
   1 -15  -2    3.90    0.97
   1 -15  -2    2.38    3.22
  -1 -15   2    3.08    3.24
   1  15   2    2.79    0.71
   1  15   2    4.25    0.99
   1 -15  -2    0.99    1.13
  -1 -15   2    3.41    0.92
   1 -15  -2    2.53    0.72
   1  15   2    2.46    0.74
   2  15  -2    3.16    0.84
  -2 -15  -2    1.16    1.49
   2 -15   2    2.99    0.77
   2 -15   2    1.49    3.26
   2  15  -2    2.84    0.85
  -2 -15  -2    3.11    0.90
  -2  15   2    2.92    0.85
  -2  15   2    3.47    0.98
   2 -15   2    2.69    0.77
  -2 -15   2   -2.02    2.90
   2 -15  -2    3.12    0.79
  -2 -15   2    2.32    0.89
   2 -15  -2    4.18    0.87
   2  15   2    4.03    0.75
  -2  15  -2    3.59    0.94
   2  15   2    3.19    0.82
   3  15  -2    4.93    0.87
  -3  15   2    2.83    0.94
  -3 -15  -2    2.04    1.93
   3  15  -2    4.72    1.21
   3 -15   2   -1.37    2.49
  -3  15   2    4.39    1.15
   3  15  -2    1.92    2.93
   3  15  -2    2.44    2.37
   3 -15   2    4.55    0.84
   3 -15   2    5.38    1.17
  -3 -15  -2    3.68    1.10
  -3 -15  -2    1.63    2.82
   3  15   2    3.06    2.37
  -3  15  -2    4.22    1.06
  -3 -15   2    1.03    0.70
   3 -15  -2    2.95    0.94
   3 -15  -2   -0.07    3.26
   3  15   2    4.82    0.88
   3 -15  -2    4.07    0.86
   3  15   2    2.52    0.86
  -3 -15   2    2.61    3.88
  -3 -15   2    1.60    1.68
  -4 -15  -2    1.72    1.11
   4 -15   2    0.96    3.27
  -4 -15  -2   -0.07    2.66
   4 -15   2    2.25    0.88
  -4  15   2    1.52    0.61
   4 -15  -2    1.16    0.74
   4 -15  -2   -0.02    3.52
  -4 -15   2   -0.24    3.92
  -4 -15   2   -0.07    1.14
   4  15   2    2.21    0.93
  -4 -15   2    2.78    1.01
  -5 -15  -2   -1.50    4.06
  -5 -15  -2    1.14    2.15
   5 -15   2   11.98    1.98
  -5 -15   2   -2.59    5.03
   5 -15  -2    9.44    1.66
  -6 -15  -2    1.27    2.82
   0 -16  -2    0.10    0.46
   0  16  -2    0.13    0.42
   0  16   2   -0.15    0.40
   0 -16   2   -1.35    3.21
   0 -16  -2    1.30    3.32
   0  16   2    0.19    0.50
   0  16  -2   -0.41    0.39
   0 -16   2    0.13    0.53
   0 -16  -2   -0.01    1.02
  -1 -16  -2    3.97    3.39
   1 -16   2   -0.52    3.43
   1 -16   2    4.33    0.92
   1  16  -2    2.72    0.76
  -1  16   2    3.31    0.96
   1  16  -2    2.08    0.71
  -1 -16  -2    3.98    1.01
  -1 -16  -2    1.16    1.31
  -1  16   2    3.40    0.97
   1  16   2    4.23    0.92
   1 -16  -2    3.99    0.71
   1 -16  -2    4.97    1.03
   1  16   2    4.00    0.92
  -1 -16   2    3.49    0.99
  -1  16  -2    3.23    0.92
  -1 -16   2    3.27    3.55
   1 -16  -2    2.86    3.29
  -2  16   2    1.53    0.78
   2  16  -2    2.33    0.69
   2 -16   2    1.62    0.84
  -2 -16  -2    1.84    0.91
   2 -16   2    2.94    3.97
  -2  16   2    1.32    0.70
  -2 -16  -2    4.04    3.78
   2 -16   2    2.77    0.75
   2  16  -2    1.78    0.76
  -2 -16  -2    1.21    1.62
   2 -16   2    2.48    0.47
   2 -16  -2    2.22    0.78
  -2  16  -2    2.93    0.84
  -2 -16   2    0.34    1.22
   2  16   2    1.50    0.66
   2 -16  -2    1.45    3.21
   2 -16  -2    2.17    0.70
  -2 -16   2    0.10    2.94
   2  16   2    1.24    0.61
  -2 -16   2    1.72    0.69
   3 -16   2    1.09    0.59
  -3  16   2    0.28    0.55
  -3 -16  -2    0.28    2.57
   3  16  -2   -0.60    2.05
  -3 -16  -2   -0.40    0.42
   3 -16   2   -2.45    2.80
   3  16  -2    0.06    0.47
  -3  16   2   -0.24    0.54
   3  16  -2    1.05    0.62
   3 -16   2   -0.62    0.56
  -3 -16  -2   -0.66    1.53
  -3 -16   2   -0.11    0.44
   3 -16  -2    0.55    0.51
   3  16   2    1.31    0.61
   3 -16  -2   -1.01    2.87
  -3 -16   2    0.01    1.13
  -3  16  -2    0.26    0.56
  -3 -16   2    3.98    4.39
   3 -16  -2   -0.48    0.54
  -4  16   2    2.64    0.89
   4  16  -2    2.94    1.08
  -4  16   2    2.91    0.83
  -4 -16  -2    1.73    3.58
  -4 -16  -2    3.84    1.13
   4 -16   2    1.48    3.97
   4 -16   2    0.70    0.77
  -4 -16   2    1.78    0.84
   4 -16  -2    2.39    1.05
   4 -16  -2    3.00    4.35
  -4  16  -2    3.69    0.98
   4  16   2    3.18    1.05
  -5  16   2    0.75    0.86
  -5 -16  -2    1.43    2.21
  -5 -16   2    1.30    4.20
   0  17  -2    4.74    0.95
   0  17   2    3.99    1.10
   0 -17  -2    0.46    2.77
   0 -17  -2    3.89    0.99
   0 -17   2   -1.50    2.76
   0  17   2    3.95    1.05
   0  17  -2    2.97    0.91
   0 -17   2    5.63    1.15
   0  17   2    4.84    1.03
  -1  17   2    6.45    1.28
  -1 -17  -2    7.16    1.49
  -1 -17  -2    1.15    2.76
   1  17  -2    6.33    1.24
  -1  17   2    6.25    1.41
   1  17  -2    6.85    1.26
   1 -17   2    4.30    4.31
   1 -17   2    8.70    1.46
  -1 -17   2    6.53    1.28
   1  17   2    5.65    1.14
   1 -17  -2    6.15    0.90
  -1 -17   2    3.32    4.25
   1 -17  -2    7.44    1.33
   1 -17  -2    3.04    3.97
  -1  17  -2    7.04    1.08
  -1  17  -2    5.27    1.30
   1  17   2    4.78    1.12
  -2 -17  -2    2.06    0.86
  -2  17   2    1.86    0.79
  -2 -17  -2   -0.05    1.57
   2 -17   2    1.25    0.64
   2  17  -2    1.51    0.70
   2 -17   2    3.46    4.74
   2  17  -2    0.09    0.61
  -2 -17  -2   -0.28    2.76
  -2  17   2    1.18    0.74
   2 -17  -2    3.35    0.90
  -2 -17   2    1.65    3.71
   2 -17  -2    0.36    3.23
   2  17   2    1.78    0.71
  -2  17  -2    1.40    0.66
   2  17   2    1.95    0.80
   2 -17  -2    2.06    0.71
  -2 -17   2    2.06    0.83
   3  17  -2    2.18    0.85
  -3 -17  -2    1.91    0.91
   3  17  -2    3.21    5.50
  -3 -17  -2   -0.25    4.05
  -3  17   2    1.79    0.94
   3  17  -2    0.49    2.62
   3 -17   2   -1.56    3.63
   3 -17   2    2.02    0.82
  -3  17   2    2.09    0.91
   3  17  -2    3.34    0.69
   3 -17   2    4.40    0.99
   3 -17  -2    2.85    0.90
   3  17   2    4.29    1.07
  -3  17  -2    2.79    0.90
  -3 -17   2    2.35    0.90
   3 -17  -2    3.63    0.97
   3 -17  -2   -0.50    3.25
  -3 -17   2   -1.65    3.31
  -4 -17  -2    0.11    1.71
  -4 -17  -2    0.04    3.89
  -4  17   2    3.31    1.14
   4 -17   2   -0.26    4.13
  -4 -17   2   -1.29    4.71
   4 -17  -2    0.71    4.78
  -5  17   2    1.87    1.64
   0  18   2   -0.91    0.39
   0  18  -2   -0.65    0.46
   0 -18  -2   -0.06    0.94
   0 -18   2   -1.34    3.49
   0 -18   2   -0.32    0.56
   0 -18  -2   -0.35    0.54
   0  18  -2   -0.68    0.45
   0 -18  -2    1.68    2.97
   0  18   2    0.61    0.61
   1 -18   2    4.56    5.69
  -1 -18  -2    1.48    0.79
   1 -18   2    0.59    0.50
   1  18  -2   -0.05    0.68
   1  18  -2   -0.73    0.44
  -1 -18   2    0.79    0.71
   1 -18  -2    0.68    0.66
  -1  18  -2    1.02    0.60
   1  18   2    1.84    0.77
   1  18   2    0.77    0.69
   1 -18  -2   -3.91    2.96
  -1  18  -2    0.53    0.79
   2 -18   2    0.71    0.62
  -2  18   2   -0.66    0.45
  -2 -18  -2    3.23    3.84
   2  18  -2    1.29    0.63
  -2  18   2    0.45    0.64
   2  18  -2   -0.64    0.58
  -2 -18  -2   -0.95    1.47
   2 -18   2   -0.94    3.82
  -2 -18  -2    1.46    0.67
   2 -18  -2    0.52    0.56
   2  18   2   -0.26    0.49
   2  18   2   -0.21    0.47
   2 -18  -2   -3.81    3.35
  -2 -18   2   -0.73    0.46
   2 -18  -2   -0.49    0.45
  -2 -18   2   -2.22    2.98
  -2  18  -2   -0.01    0.50
  -3  18   2    2.77    0.84
   3 -18   2    3.22    0.95
  -3 -18  -2    1.28    3.66
   3  18  -2   -0.59    3.29
  -3 -18  -2    0.87    1.74
   3 -18   2   -1.24    3.61
   3  18  -2    2.00    0.85
   3  18  -2    2.21    0.83
  -3 -18   2    0.03    4.20
   3 -18  -2    3.43    0.91
   3  18   2    4.89    0.82
   3 -18  -2   -0.91    3.63
   4 -18   2   -2.81    5.31
  -4  18   2   -1.03    0.67
   4 -18  -2   -0.70    6.24
   4 -18  -2   -0.33    0.67
   0  19  -2    0.89    0.75
   0 -19   2   -3.84    3.64
   0 -19   2    1.14    0.84
   0  19  -2    0.78    0.54
   0  19   2    2.14    0.81
   0 -19  -2    0.24    4.51
   0  19   2    0.50    0.67
   1 -19   2    1.71    5.53
   1  19  -2    3.77    1.01
  -1 -19  -2    1.07    1.54
   1  19  -2    4.11    1.05
  -1  19   2    5.15    1.27
  -1 -19  -2    3.77    1.06
  -1  19   2    4.89    1.19
   1 -19   2    4.25    1.06
  -1 -19  -2   -3.91    3.54
   1 -19  -2    4.11    1.08
   1  19   2    3.93    0.95
  -1 -19   2   -1.29    4.14
  -1  19  -2    2.47    0.96
  -1 -19   2    3.14    0.98
   1 -19  -2    2.87    5.73
   1  19   2    2.65    0.96
  -1  19  -2    4.20    0.94
   2 -19   2    0.09    0.64
   2  19  -2    0.65    0.69
   2 -19   2   -1.86    5.79
  -2  19   2   -0.40    0.74
   2  19  -2    0.65    0.57
   2  19   2    0.25    0.63
  -2  19  -2    0.74    0.41
   2  19   2    0.02    0.64
   2 -19  -2    0.52    5.00
   2 -19  -2    0.30    0.69
   3  19  -2   -0.12    3.91
   3 -19   2   -2.00    5.74
   3 -19  -2   -2.89    5.71
   4 -19   2   -0.54    7.58
   0 -20   2    0.62    0.79
   0  20   2    0.81    0.50
   0  20  -2    0.71    0.67
   0  20   2    1.47    0.82
   0 -20  -2    1.84    0.89
   1 -20   2    2.73    1.11
   1  20  -2    1.57    1.05
   1  20  -2    2.16    0.77
  -1  20   2    3.09    0.96
   1 -20  -2    1.53    0.74
   1  20   2    1.65    0.79
  -1  20  -2    1.60    0.75
   2  20  -2    0.94    0.79
   2  20   2    0.13    0.71
   2 -20  -2   -5.30    6.95
  -2  20  -2    0.45    0.59
   2 -20  -2    1.17    0.98
   3  20  -2   -4.79    4.74
   0  21  -2    0.94    0.75
  -1  21  -2    1.14    0.77
   2 -21   2   -0.69    1.41
   0   0   3    0.83    1.02
   0   0   3   -0.02    0.12
   0   0   3   -0.01    0.11
   0   0  -3   -0.45    0.71
   0   0  -3   -0.09    0.09
   0   0  -3    0.03    0.12
   0   0  -3    0.64    1.11
   0   0   3   -0.03    0.09
   0   0  -3   -0.04    0.10
  -1   0  -3  154.43    2.40
   1   0  -3  151.36    2.52
   1   0   3  149.06    2.20
  -1   0  -3  147.11    2.73
   1   0   3  147.81    2.56
  -1   0   3  149.89    2.76
  -1   0   3  150.73    2.94
  -1   0  -3  147.74    2.63
  -1   0   3  144.42    2.50
  -1   0   3  151.43    2.51
   1   0  -3  151.40    2.76
   1   0  -3  147.95    2.95
  -1   0  -3  153.39    2.76
   1   0  -3  153.54    2.72
  -1   0  -3  153.05    2.18
  -1   0  -3  145.71    2.57
   1   0  -3  147.07    2.51
   1   0   3  149.86    2.45
   1   0   3  147.44    2.80
  -2   0   3    8.13    0.75
  -2   0   3    7.88    0.59
   2   0   3    7.68    0.48
  -2   0   3   19.76    7.15
  -2   0  -3    8.63    0.59
  -2   0   3    8.12    0.66
   2   0  -3    8.23    0.55
   2   0   3    8.72    0.64
  -2   0  -3   12.36    3.83
   2   0  -3    7.78    0.45
   2   0   3    8.30    0.69
   2   0  -3    7.80    0.59
   2   0   3    7.90    0.66
  -2   0  -3    7.76    0.50
   2   0  -3   -0.35    4.12
  -2   0   3    7.99    0.46
   2   0  -3    8.80    0.78
  -2   0  -3    8.61    0.71
  -2   0  -3    8.50    0.67
   2   0  -3    7.94    0.70
  -2   0   3    9.09    0.47
  -2   0   3    8.83    0.65
  -3   0   3   10.28    0.82
   3   0   3   12.22    0.99
   3   0  -3   11.26    0.84
  -3   0   3   19.55    8.42
  -3   0  -3   10.86    0.79
  -3   0  -3    9.46    0.60
   3   0  -3   11.39    0.98
   3   0  -3   10.10    0.57
  -3   0  -3   10.09    0.61
  -3   0  -3    9.30    0.82
  -3   0   3    9.52    0.57
  -3   0   3    8.97    0.80
   3   0   3   11.96    0.95
   3   0   3   10.11    0.59
  -3   0  -3   10.11    0.88
   3   0  -3   11.72    1.06
  -3   0   3   10.02    0.75
   3   0   3   10.20    0.89
  -3   0   3    9.84    0.54
  -4   0   3  114.99    2.31
  -4   0   3  104.68    3.80
  -4   0  -3  118.61    2.63
   4   0  -3  117.99    3.77
  -4   0  -3  104.16    7.88
  -4   0   3  113.98    2.43
   4   0  -3  116.54    3.36
   4   0  -3  115.27    3.98
  -4   0   3  117.75    2.35
   4   0   3  115.84    3.73
  -4   0   3  120.17    3.06
  -4   0  -3  119.16    2.57
   4   0   3  118.17    3.64
  -4   0  -3  112.97    2.65
   4   0   3  113.91    3.66
   5   0  -3    2.92    0.86
   5   0   3    4.89    0.99
   5   0   3    4.85    0.98
  -5   0  -3    4.18    0.49
  -5   0  -3    4.08    0.57
  -5   0   3    5.41    0.38
  -5   0   3    4.97    0.44
  -5   0   3    5.46    0.39
   5   0   3    4.92    1.01
  -5   0   3    5.66    0.69
  -5   0  -3    8.11    2.86
  -5   0  -3    5.02    0.50
   5   0  -3    5.90    1.13
   5   0  -3    4.58    0.88
  -6   0  -3    2.25    0.35
   6   0   3    2.05    0.74
   6   0   3    0.60    0.48
  -6   0   3    1.53    0.48
   6   0  -3    1.77    0.73
   6   0  -3    2.05    0.87
   6   0   3    3.02    1.02
  -6   0  -3    1.31    0.95
   6   0  -3    1.46    3.32
   7   0  -3   -0.02    0.66
   7   0  -3   -0.19    0.57
   7   0   3   -0.54    0.52
   7   0   3   -0.19    0.66
   7   0  -3   -0.86    2.68
   8   0  -3   -2.08    5.81
   0   1  -3  290.83   10.90
   0  -1   3  343.84   11.36
   0   1   3  343.04   11.26
   0  -1  -3  338.90   11.16
   0   1  -3  366.51   11.69
  -1   1   3   15.24    0.57
  -1   1   3   27.06    6.15
  -1   1   3   15.77    0.68
   1  -1   3   15.32    0.52
  -1   1   3   14.92    0.75
  -1  -1  -3   15.41    0.74
  -1   1   3   15.39    0.83
   1  -1   3   15.71    0.68
   1   1  -3   15.53    0.66
  -1  -1  -3   15.35    0.62
   1   1  -3   15.15    0.81
   1  -1   3   14.60    0.67
   1  -1   3   15.04    0.63
   1   1  -3   15.27    0.54
  -1  -1  -3   15.24    0.54
  -1   1  -3   15.73    0.66
   1   1   3   15.23    0.53
  -1  -1   3   14.59    0.66
   1  -1  -3   15.95    0.74
   1   1   3   15.22    0.61
  -1  -1   3   15.59    0.78
   1   1   3   15.00    0.61
  -1  -1   3   15.21    0.68
  -1   1  -3   14.85    0.61
  -1   1  -3   14.34    0.65
  -1   1  -3   14.68    0.73
  -1   1  -3   15.40    0.49
   2   1  -3    7.27    0.63
  -2   1   3    7.34    0.65
  -2  -1  -3    3.79    2.93
   2   1  -3    5.58    0.65
  -2   1   3   14.20    5.91
  -2   1   3    6.33    0.55
   2   1  -3    6.98    4.36
   2  -1   3    6.28    0.54
   2  -1   3    6.42    0.63
  -2   1   3    6.44    0.51
   2  -1   3    7.15    0.63
  -2   1   3    7.09    0.38
  -2  -1  -3    7.45    0.45
  -2   1   3    6.64    0.67
  -2  -1  -3    6.69    0.53
  -2  -1  -3    6.97    0.61
   2   1  -3    6.95    0.49
   2  -1   3    7.31    0.51
  -2  -1  -3    6.57    0.61
  -2  -1  -3    6.57    0.32
  -2  -1   3    7.23    0.63
   2   1   3    3.86    3.71
   2   1   3    6.98    0.59
   2  -1  -3    6.02    0.67
  -2   1  -3    7.21    0.53
  -2  -1   3    6.43    0.39
   2  -1  -3    6.96    0.51
   2  -1  -3    6.84    0.54
  -2  -1   3    6.61    0.64
   2   1   3    7.04    0.61
   2  -1  -3    0.94    4.09
  -2   1  -3    6.88    0.65
   2  -1  -3    7.01    0.41
  -2   1  -3    2.18    3.46
  -2  -1   3    6.89    0.55
   2   1   3    7.44    0.68
   2  -1  -3    6.11    0.65
  -2   1  -3    7.73    0.55
  -2   1  -3    6.59    0.56
  -2  -1   3    6.85    0.58
   2   1   3    6.70    0.42
  -2   1  -3    7.29    0.45
  -3  -1  -3   12.57    0.62
  -3  -1  -3    3.77    3.84
   3   1  -3   11.80    0.91
  -3  -1  -3   12.31    0.43
  -3  -1  -3   10.28    0.82
  -3  -1  -3   12.32    0.76
  -3  -1  -3   12.41    0.97
   3  -1   3   12.22    1.02
   3   1  -3   11.71    0.67
   3   1  -3   12.83    1.09
  -3   1   3   12.27    0.84
  -3   1   3   11.22    0.84
   3  -1   3   10.94    0.92
   3  -1   3   12.65    0.96
  -3   1   3   12.61    0.53
   3  -1   3   11.09    0.67
  -3   1   3   15.17    7.84
  -3  -1  -3   12.66    0.43
   3   1  -3   12.67    1.00
  -3   1   3   11.76    0.69
  -3  -1   3   12.42    1.11
   3   1   3   12.53    0.94
  -3   1  -3   12.36    0.86
   3  -1  -3   12.97    0.76
  -3  -1   3   12.12    0.93
   3  -1  -3   12.25    1.07
  -3  -1   3   11.28    0.69
   3  -1  -3   12.09    1.09
  -3   1  -3   12.98    0.76
  -3   1  -3   12.30    0.64
  -3  -1   3   11.72    0.89
  -3  -1   3   12.29    0.82
   3  -1  -3   12.64    0.86
   3  -1  -3   11.92    0.51
   3   1   3   12.16    0.96
   3   1   3   13.17    1.07
  -3   1  -3   12.11    0.89
  -3  -1   3   11.87    0.45
   3   1   3   12.01    0.59
  -4   1   3   16.14    0.85
  -4  -1  -3   22.68    3.88
   4   1  -3   16.38    1.26
  -4   1   3   17.05    0.83
   4  -1   3   17.88    1.35
   4   1  -3   15.67    1.41
  -4  -1  -3   16.62    0.95
  -4   1   3   18.88    1.73
   4  -1   3   15.99    1.32
  -4   1   3   16.91    0.64
   4   1  -3   15.32    1.29
  -4   1   3   15.82    1.03
   4  -1   3   17.32    1.37
  -4   1  -3   17.24    0.80
   4  -1  -3   16.66    1.40
  -4  -1   3   17.20    0.51
   4  -1  -3   16.55    1.43
  -4   1  -3   16.51    0.85
  -4   1  -3   22.47    3.75
   4   1   3   17.70    1.33
   4   1   3   16.85    1.39
  -4  -1   3   20.59    1.97
  -4  -1   3   15.74    1.03
   4   1   3   19.76    1.46
  -4  -1   3   17.29    0.50
  -4  -1   3   17.73    0.92
  -4   1  -3   16.94    0.93
   4  -1  -3   16.46    1.15
   5   1  -3   15.39    1.38
  -5   1   3   14.82    0.81
  -5   1   3   17.08    1.12
   5   1  -3   14.02    1.53
  -5  -1  -3   15.42    0.66
  -5   1   3   16.69    0.86
   5  -1   3   16.84    1.47
  -5  -1  -3   11.24    1.81
   5  -1   3   15.29    1.48
   5  -1   3   15.90    1.47
  -5   1   3   12.12    1.68
  -5  -1  -3   16.64    0.99
   5   1  -3   15.37    1.48
  -5  -1  -3    7.88    3.21
   5   1   3   17.42    1.44
  -5   1  -3   15.02    0.93
   5   1   3   17.34    1.57
   5   1   3   16.25    1.60
   5  -1  -3   15.41    1.52
   5  -1  -3   16.43    1.61
  -5  -1   3   15.69    1.10
  -5  -1   3   14.39    0.87
   5  -1  -3   16.51    1.33
  -5  -1   3   12.05    1.75
  -5   1  -3   12.21    3.22
  -5   1  -3   15.74    0.71
   6  -1   3    4.34    1.02
  -6   1   3    3.47    0.60
   6   1  -3    2.88    1.09
  -6  -1  -3    4.33    0.51
   6   1  -3    4.66    0.96
   6  -1   3    4.63    1.18
   6   1  -3   -0.53    2.50
   6  -1   3    5.96    1.30
  -6  -1   3    3.26    0.47
   6  -1  -3    6.75    1.35
  -6  -1   3    4.19    0.71
   6   1   3    4.22    1.04
   6  -1  -3    6.15    1.37
   6   1   3    2.49    0.95
   6   1   3    2.39    0.80
  -6   1  -3    3.97    0.47
   7  -1   3    1.85    0.93
   7   1  -3    2.16    0.97
   7  -1   3    2.40    1.05
   7   1  -3    1.07    0.74
   7  -1   3    0.84    0.79
   7   1  -3   -2.22    3.09
   7  -1  -3   -2.53    2.96
   7  -1  -3   -0.18    0.62
   7   1   3    1.90    0.73
   7   1   3    1.98    0.86
   7  -1  -3    2.64    1.00
   8  -1   3    1.03    0.88
   8  -1   3   -1.04    0.98
   8   1  -3   -7.79    5.72
   8  -1  -3    2.35    5.87
   1   2  -3   21.78    0.95
  -1  -2  -3   22.00    0.80
  -1  -2  -3   23.13    0.80
  -1   2   3   23.01    0.57
   1   2  -3   23.35    0.91
   1  -2   3   22.53    0.72
   1  -2   3   23.40    0.90
   1  -2   3   23.59    0.79
   1  -2   3   23.53    0.83
   1   2  -3   22.62    0.69
  -1  -2  -3   23.78    0.99
   1  -2   3   25.19    0.99
  -1  -2   3   23.24    0.95
  -1  -2   3   24.24    0.72
   1   2   3   24.03    0.80
   1  -2  -3   14.99    5.59
   1  -2  -3   23.52    0.73
  -1   2  -3   23.06    0.77
  -1   2  -3   22.78    0.91
  -1   2  -3   22.81    0.62
   1   2   3   24.68    1.03
   1  -2  -3   24.37    1.00
  -1   2  -3   21.77    0.95
   1  -2  -3   23.15    0.97
   1   2   3   23.45    0.81
  -2   2   3  149.80    2.82
  -2  -2  -3  149.47    3.46
   2  -2   3  149.24    3.00
  -2  -2  -3  150.90    3.17
   2  -2   3  150.80    3.19
   2   2  -3  147.72    2.99
   2   2  -3  148.97    3.60
   2  -2   3  151.84    3.26
  -2   2   3  150.54    3.19
  -2  -2  -3  148.45    3.08
   2  -2   3  155.93    3.52
   2   2  -3  152.82    2.30
  -2   2   3  153.19    3.58
   2   2  -3  144.26    3.08
  -2  -2  -3  148.73    2.64
  -2  -2  -3  151.93    2.63
  -2   2   3  151.76    3.44
   2  -2   3  149.28    2.33
   2  -2  -3  149.50    3.53
  -2  -2   3  150.19    3.41
  -2   2  -3  148.78    2.94
  -2  -2   3  151.07    2.28
  -2  -2   3  149.38    3.48
  -2  -2   3  148.70    2.98
  -2  -2   3  145.84    3.04
   2   2   3  149.46    2.59
  -2   2  -3  147.31    2.57
   2  -2  -3  149.22    2.74
   2   2   3  152.78    3.28
   2  -2  -3  148.44    2.32
  -2   2  -3  151.83    3.56
   2  -2  -3  151.80    3.12
  -2   2  -3  154.13    3.06
  -2   2  -3  149.51    3.04
   2   2   3  149.37    3.53
   3   2  -3   92.80    2.79
   3   2  -3   89.36    2.69
  -3  -2  -3   92.41    2.60
   3   2  -3   87.72    2.29
  -3  -2  -3   90.21    2.43
   3  -2   3   93.73    2.32
  -3   2   3   88.10    2.45
   3  -2   3   89.82    2.66
  -3   2   3   88.56    2.38
  -3  -2  -3   89.87    2.72
   3  -2   3   93.18    2.96
   3  -2   3   89.50    2.69
   3   2  -3   84.39    3.01
  -3  -2  -3   88.04    1.84
  -3  -2  -3   90.63    1.82
   3   2   3   89.00    2.80
  -3   2  -3   90.17    2.54
  -3  -2   3   90.06    2.35
  -3   2  -3   92.96    2.55
   3   2   3   90.01    1.78
   3  -2  -3   89.92    2.33
   3   2   3   94.69    2.65
  -3   2  -3   91.07    1.83
   3  -2  -3   91.75    2.38
   3   2   3   94.02    3.03
   3  -2  -3   89.99    3.06
   3  -2  -3   90.05    3.03
  -3  -2   3   92.21    4.05
  -3  -2   3   95.33    2.45
  -3   2  -3   89.96    2.34
  -3  -2   3   90.24    2.56
   4   2  -3    0.84    0.58
   4   2  -3    1.11    0.47
   4   2  -3   -1.00    1.38
   4  -2   3    0.89    0.44
  -4  -2  -3    1.07    0.21
   4  -2   3    1.03    0.46
  -4  -2  -3    0.53    1.56
  -4   2   3    0.48    0.27
  -4  -2  -3   -0.60    1.30
  -4   2   3    0.59    0.44
   4   2  -3    0.73    0.40
  -4  -2  -3    0.04    0.66
  -4   2   3    1.07    0.34
  -4  -2  -3    0.62    0.20
   4  -2   3    1.91    0.57
  -4  -2  -3    1.12    0.38
  -4   2   3    1.19    0.31
  -4  -2  -3    0.32    0.18
  -4   2  -3    1.08    0.33
  -4  -2   3    0.72    0.71
   4  -2  -3    0.53    0.39
  -4  -2   3    1.12    0.34
  -4   2  -3    0.45    1.01
   4   2   3    0.81    0.42
  -4   2  -3   -0.02    1.35
  -4   2  -3    0.72    0.19
  -4   2  -3    1.19    0.21
   4  -2  -3    1.09    0.50
   4   2   3   -0.79    1.22
   4  -2  -3    1.15    0.35
   4   2   3    0.77    0.50
  -4  -2   3    1.81    0.46
   4  -2  -3   -0.04    1.63
  -4  -2   3    0.24    1.23
  -4  -2   3    0.12    0.28
   4   2   3    1.39    0.55
   5   2  -3   11.86    1.43
   5   2  -3   11.42    1.23
  -5   2   3   10.16    0.81
   5  -2   3   12.90    1.24
  -5  -2  -3   10.63    0.88
  -5   2   3   10.59    0.76
   5  -2   3   12.21    1.33
  -5  -2  -3    9.86    3.25
   5  -2   3    9.92    1.42
  -5  -2  -3    9.19    1.85
  -5   2   3   10.42    0.91
  -5   2   3    7.51    1.61
   5  -2  -3    9.43    1.51
  -5  -2   3    7.62    1.82
   5  -2  -3   10.71    1.07
   5   2   3   11.27    1.34
  -5  -2   3    7.46    1.88
   5   2   3   12.82    1.25
  -5  -2   3   10.79    0.94
  -5  -2   3   11.39    0.89
  -5   2  -3   10.69    0.84
   5  -2  -3   10.41    1.53
   5   2   3    9.30    1.38
   6   2  -3    4.79    1.07
   6  -2   3    4.05    1.13
   6  -2   3    4.73    1.07
  -6  -2  -3    2.54    1.66
   6   2  -3    0.71    2.62
   6   2  -3    5.39    1.26
   6  -2   3    4.87    1.18
  -6  -2  -3    5.35    0.75
  -6   2   3    6.08    0.70
  -6   2   3    5.76    0.57
  -6  -2   3    5.22    0.63
  -6  -2   3    5.30    0.83
   6   2   3    4.43    1.03
   6   2   3    5.24    1.21
   6  -2  -3    6.38    1.39
   6  -2  -3    5.01    1.23
  -6   2  -3    4.84    0.70
   7  -2   3    3.59    1.11
   7  -2   3    3.08    1.22
   7   2  -3    3.73    1.06
   7  -2   3    3.51    1.20
   7   2  -3    0.28    3.75
   7   2   3    3.15    1.04
   7  -2  -3    0.26    3.54
   7   2   3    5.67    1.40
   7  -2  -3    5.33    1.27
   8  -2   3    3.73    1.05
   0   3   3    0.12    2.75
   0   3   3    1.31    1.25
   0   3   3   -0.44    1.75
   0  -3   3    1.72    2.06
   0  -3  -3    1.98    3.23
   0   3  -3    1.13    1.74
   0  -3  -3    1.12    1.31
   1   3  -3   18.35    0.88
   1  -3   3   18.53    0.74
   1  -3   3   18.50    0.75
  -1  -3  -3   19.73    0.86
   1  -3   3   20.32    0.92
  -1   3   3   18.79    0.94
   1   3  -3   18.63    0.90
   1  -3   3   19.44    0.88
   1   3  -3   18.61    0.69
  -1  -3  -3   19.65    0.94
  -1   3  -3   19.64    0.90
   1   3   3   19.18    0.99
  -1  -3   3   18.71    0.68
   1   3   3   17.82    0.92
  -1   3  -3   18.45    0.91
  -1  -3   3   18.96    0.90
   1  -3  -3   17.81    0.91
  -1  -3   3   18.09    0.84
   1  -3  -3    8.50    4.66
  -1   3  -3   18.29    0.73
   1  -3  -3   18.86    0.93
   1   3   3   18.83    0.76
   2  -3   3   10.99    0.54
   2   3  -3   10.59    0.87
  -2   3   3   11.28    1.04
  -2  -3  -3   11.15    0.73
  -2  -3  -3   10.64    0.54
   2  -3   3   10.88    0.87
  -2   3   3   10.14    0.74
  -2   3   3   10.39    0.82
   2  -3   3   10.78    0.71
   2   3  -3   10.86    0.68
  -2  -3  -3   11.02    0.65
  -2  -3  -3   11.98    0.74
   2  -3   3   10.41    0.70
  -2  -3  -3   11.00    0.87
  -2   3   3   10.79    0.52
  -2  -3  -3   10.53    0.77
   2   3  -3   11.14    0.74
   2   3  -3   11.01    0.41
   2  -3   3   11.60    0.55
   2   3   3   11.02    0.76
  -2   3  -3    5.86    4.86
   2   3   3   11.77    0.92
   2  -3  -3   10.84    0.42
  -2   3  -3    9.84    0.84
  -2  -3   3   10.05    0.74
  -2   3  -3   10.92    0.67
  -2  -3   3   10.30    0.80
  -2   3  -3   11.51    0.66
   2   3   3   11.53    0.81
  -2  -3   3   10.26    0.82
   2  -3  -3   11.72    0.93
  -2   3  -3   10.68    0.51
  -2   3  -3   11.37    0.53
  -2  -3   3   11.33    0.40
  -2   3  -3   10.37    0.73
   2  -3  -3   12.83    0.82
   2   3   3   10.37    0.52
  -3  -3  -3   26.66    1.02
  -3  -3  -3   25.47    1.29
   3   3  -3   25.84    1.62
   3  -3   3   27.19    0.98
   3  -3   3   26.15    1.55
   3  -3   3   28.03    1.41
   3   3  -3   25.92    1.32
  -3   3   3   27.91    1.32
  -3   3   3   27.51    1.14
   3   3  -3   26.49    1.45
   3  -3   3   25.57    1.21
   3  -3   3   25.48    1.33
  -3  -3  -3   27.71    1.39
  -3  -3  -3   26.98    0.82
   3  -3  -3   27.21    1.13
  -3   3  -3   24.15    1.22
   3   3   3   24.54    1.53
  -3   3  -3   26.36    0.77
  -3  -3   3   28.04    1.31
   3  -3  -3   25.74    1.21
   3   3   3   28.07    1.53
   3  -3  -3   25.16    1.58
  -3   3  -3   27.67    0.76
  -3   3  -3   26.27    1.26
   3   3   3   26.93    0.79
  -3   3  -3   25.65    1.22
   4   3  -3    3.87    0.79
   4   3  -3    2.85    0.55
   4  -3   3    3.17    0.79
   4   3  -3    0.13    1.60
   4   3  -3    2.18    0.60
  -4   3   3    1.19    0.85
   4   3  -3    2.45    0.73
   4  -3   3    3.33    0.69
  -4   3   3    3.57    0.57
  -4  -3  -3    1.52    1.94
  -4  -3  -3    2.64    0.55
  -4  -3  -3    3.21    0.38
  -4   3   3    3.15    0.63
   4  -3   3    3.68    0.75
  -4  -3  -3    2.36    1.51
  -4   3   3    3.47    0.57
   4   3  -3    1.05    1.94
  -4  -3  -3    2.01    1.16
  -4  -3   3    1.90    1.12
  -4  -3   3    2.93    0.55
   4   3   3    2.86    0.69
   4   3   3    4.04    0.88
  -4   3  -3    2.85    0.57
  -4  -3   3    2.43    1.37
   4  -3  -3    4.24    0.91
   4  -3  -3    3.61    0.64
   4   3   3    2.63    0.60
   4  -3  -3   -0.06    2.08
  -4  -3   3    3.52    0.61
  -4   3  -3    0.88    1.44
   4  -3  -3    3.10    0.49
  -5   3   3    7.23    0.72
   5  -3   3    5.23    0.91
   5  -3   3    6.24    1.20
   5   3  -3    6.04    1.23
  -5  -3  -3    5.12    0.45
   5  -3   3    7.71    1.24
  -5   3   3    5.90    0.66
  -5  -3  -3    4.96    0.45
  -5  -3  -3    2.25    2.07
   5   3  -3    6.23    1.01
  -5  -3  -3    5.84    0.69
  -5  -3   3    5.70    0.82
  -5  -3   3    6.04    0.86
  -5   3  -3    5.98    0.83
   5   3   3    5.79    0.95
   5  -3  -3    7.21    1.00
  -5   3  -3    2.29    1.69
   5  -3  -3    5.78    1.16
  -5  -3   3    2.14    1.58
   5   3   3    7.72    1.29
   5   3   3    5.01    1.04
  -6  -3  -3    6.93    0.87
  -6   3   3    8.45    0.78
   6  -3   3   10.60    1.62
   6  -3   3   10.31    1.20
   6   3  -3    8.43    1.32
   6  -3   3    9.48    1.47
   6   3  -3    8.39    1.57
   6   3  -3    3.36    3.39
  -6   3   3    7.55    0.78
   6   3   3    7.58    1.41
   6  -3  -3    9.69    1.69
  -6   3  -3    3.87    2.38
  -6  -3   3    9.19    0.95
  -6  -3   3    8.76    0.86
   6   3   3    8.94    1.52
  -6   3  -3    8.74    0.92
   7   3  -3    0.02    0.54
   7   3  -3    0.27    3.59
   7   3  -3   -1.41    0.51
   7  -3   3   -0.57    0.61
   7  -3   3   -0.65    0.48
   7  -3  -3   -1.30    3.09
   7   3   3    0.12    0.66
   7   3   3    1.45    0.84
   7  -3  -3   -0.58    0.44
   8   3  -3   -0.13    0.76
   8  -3   3   -0.21    0.91
   8   3  -3   -0.14    6.32
   0   4  -3    0.80    1.68
   0   4  -3    0.87    0.74
   0   4   3   -1.79    2.24
   0  -4  -3   -1.03    2.38
   0   4   3   -0.36    1.07
   0  -4   3    1.94    2.05
   0  -4  -3    0.04    1.61
   0  -4  -3    1.33    1.26
   0   4   3    0.69    2.18
  -1  -4  -3   36.83    1.41
   1   4  -3   39.18    1.14
   1   4  -3   38.26    1.39
   1  -4   3   36.30    1.23
  -1   4   3   35.02    1.40
   1  -4   3   36.61    1.31
  -1  -4  -3   37.50    1.36
   1  -4   3   37.29    1.37
  -1  -4  -3   39.86    1.41
  -1   4  -3   38.43    1.38
  -1  -4   3   42.13    3.34
  -1  -4   3   38.49    1.43
   1  -4  -3   35.88    1.41
   1   4   3   36.36    1.34
   1  -4  -3   36.64    1.39
   1   4   3   37.47    1.21
  -1  -4   3   36.44    1.24
  -1  -4   3   36.91    1.09
   1   4   3   36.38    1.39
  -1   4  -3   35.51    1.15
  -1   4  -3   36.07    1.35
  -2  -4  -3    8.59    0.75
  -2   4   3    3.47    4.27
   2  -4   3    8.02    0.77
  -2   4   3    8.49    0.76
  -2  -4  -3    8.70    0.65
  -2   4   3    7.99    0.74
  -2   4   3   14.24    3.01
  -2  -4  -3   22.62    6.60
  -2   4   3    8.61    0.81
   2  -4   3    8.53    0.50
   2   4  -3    8.13    0.55
   2  -4   3    8.32    0.62
   2   4  -3    8.06    0.41
  -2  -4  -3    8.93    0.81
  -2  -4  -3    8.27    0.59
  -2   4   3    8.68    0.38
   2   4  -3   18.73    4.69
   2  -4   3    8.24    0.55
   2   4  -3    8.60    0.85
   2  -4   3    8.68    0.82
  -2   4  -3    8.09    0.62
   2  -4  -3    9.08    0.44
  -2   4  -3    8.31    0.71
  -2  -4   3    7.48    0.72
   2  -4  -3    0.69    4.23
  -2  -4   3    8.79    0.41
   2  -4  -3    8.88    0.72
  -2  -4   3    8.74    0.74
   2   4   3    7.95    0.61
  -2   4  -3    8.72    0.82
   2   4   3    8.30    0.82
   2   4   3    8.07    0.51
  -2   4  -3   18.57    5.18
  -2   4  -3    8.13    0.49
  -2   4  -3    2.59    4.70
   2  -4  -3    8.47    0.42
  -2  -4   3    8.18    1.71
   2   4   3    7.43    0.70
   2  -4  -3    8.42    0.82
  -2  -4   3    8.44    0.72
  -3   4   3    7.31    0.74
  -3   4   3    7.32    0.54
   3  -4   3    7.01    0.48
  -3  -4  -3    7.03    0.78
  -3  -4  -3    7.80    0.62
   3   4  -3    5.03    0.60
   3   4  -3    6.84    4.52
   3   4  -3    6.58    0.65
   3  -4   3    7.83    0.73
  -3   4   3   11.69    3.04
  -3  -4  -3    7.88    0.78
  -3  -4   3   16.55    4.63
  -3   4  -3    7.28    0.41
   3   4   3    6.52    0.39
   3  -4  -3   -1.45    4.29
  -3   4  -3   14.55    4.66
   3   4   3    6.92    0.80
  -3   4  -3    5.12    0.56
  -3  -4   3    7.54    0.75
   3   4   3    2.55    3.17
  -3   4  -3    7.77    0.71
  -3   4  -3    7.77    0.48
   3  -4  -3    7.38    0.53
  -3   4  -3    7.36    0.71
  -3  -4   3    7.96    1.70
   4  -4   3   12.81    1.33
  -4  -4  -3   13.69    1.08
  -4   4   3   13.87    0.98
   4  -4   3   13.57    1.11
  -4  -4  -3   12.25    3.91
  -4   4   3   12.52    0.86
   4   4  -3   14.07    3.75
  -4  -4  -3   15.31    2.73
  -4   4   3   11.06    2.10
  -4   4   3   13.05    1.00
  -4  -4  -3   13.23    2.38
  -4  -4  -3   13.53    0.81
   4   4  -3   12.89    1.38
   4  -4   3   13.42    0.54
   4   4  -3   13.81    1.10
  -4   4  -3   14.28    1.05
   4  -4  -3   13.85    0.93
  -4  -4   3   14.87    1.05
   4  -4  -3   10.95    0.85
   4  -4  -3   12.90    1.36
   4   4   3   15.08    1.35
  -4   4  -3    9.95    2.86
  -4  -4   3   14.86    1.10
  -4  -4   3   12.56    2.72
   4   4   3   13.77    1.35
  -5   4   3    2.06    0.50
  -5   4   3    3.19    0.61
  -5   4   3    1.66    1.33
   5   4  -3    1.20    0.52
  -5  -4  -3    1.66    0.37
  -5  -4  -3    2.46    0.61
   5  -4   3    2.31    0.76
  -5  -4  -3    2.16    1.86
   5   4  -3   -0.49    1.90
   5  -4   3    1.86    0.61
  -5  -4  -3    1.93    0.41
  -5  -4  -3    2.45    1.49
   5   4  -3    2.24    0.80
  -5  -4  -3    2.04    1.86
   5   4   3    0.09    1.48
   5   4   3    1.65    0.59
   5  -4  -3    1.71    0.45
  -5   4  -3    2.40    1.77
  -5  -4   3    2.18    0.58
  -5   4  -3    1.75    0.57
   5  -4  -3    1.50    0.71
  -5  -4   3    2.79    1.50
   5  -4  -3    1.85    0.55
   5  -4  -3    0.13    2.11
  -5  -4   3    1.89    0.70
  -5  -4   3    0.62    0.63
  -5   4  -3    1.47    1.54
   5   4   3    2.13    0.83
  -6  -4  -3    3.05    1.51
   6  -4   3    3.05    0.88
   6   4  -3    2.30    0.72
   6  -4   3    1.52    0.82
  -6   4   3    2.21    0.51
   6   4  -3    0.80    2.99
  -6   4   3    2.66    0.57
  -6  -4  -3    1.96    0.60
   6   4  -3    1.38    0.82
  -6  -4  -3   -0.01    1.96
  -6   4  -3    1.52    0.51
  -6  -4   3    1.59    0.51
   6  -4  -3    2.22    2.66
   6  -4  -3    2.40    0.89
  -6  -4   3    1.35    1.57
  -6  -4   3    2.18    0.61
   6   4   3    4.08    1.05
   6   4   3    2.01    0.81
   7   4  -3    1.96    0.74
   7  -4   3    0.53    0.71
   7   4  -3    0.97    0.56
   7   4  -3    1.00    3.46
   7  -4   3   -0.09    0.40
   7   4   3    1.89    1.05
   7   4   3    0.24    0.69
   7  -4  -3   -1.52    3.56
   7  -4  -3    0.06    0.52
   8   4  -3    0.24    0.94
   0   5  -3    0.81    1.39
   0  -5  -3    2.30    0.44
   0  -5  -3    3.18    0.51
   0   5   3    0.87    1.17
   0   5   3   -0.49    2.27
   0   5   3    1.88    2.69
   0  -5  -3    1.11    2.17
   0  -5  -3    2.87    0.32
   0  -5   3    2.38    0.42
   0   5  -3    2.29    0.42
   0  -5   3    2.70    2.84
   0   5  -3    2.89    0.31
   0  -5   3    2.32    0.44
   0   5  -3    2.53    0.31
   0   5  -3    1.46    0.92
   0  -5   3    2.98    0.43
   0  -5  -3    1.02    1.30
   0   5   3    2.74    0.47
   0   5  -3    2.59    0.44
   0   5   3    2.89    0.32
  -1   5   3    2.88    0.55
  -1  -5  -3    4.08    2.23
  -1   5   3   -0.17    3.59
  -1  -5  -3    1.53    0.36
   1   5  -3    2.91    0.55
  -1  -5  -3    3.40    0.56
   1  -5   3    2.24    0.40
   1  -5   3    2.87    0.44
  -1   5   3    2.43    2.24
  -1   5   3    2.85    1.91
  -1  -5  -3    2.74    0.47
   1   5  -3    3.16    2.00
   1  -5   3    3.27    2.94
   1   5  -3    2.45    0.47
   1   5  -3    2.33    1.49
  -1  -5  -3    3.98    3.10
   1  -5   3    3.22    0.39
   1   5  -3    2.98    0.43
   1  -5   3    2.92    0.54
   1  -5  -3    3.03    0.51
   1   5   3    2.92    0.44
   1   5   3    2.66    0.49
   1  -5  -3    3.46    0.57
   1  -5  -3    1.27    1.57
   1   5   3    3.42    2.24
  -1   5  -3    3.71    2.26
  -1   5  -3    2.94    0.50
   1   5   3    1.50    1.93
  -1   5  -3    2.56    0.41
  -1  -5   3    3.14    0.50
  -1   5  -3    2.89    0.45
  -1  -5   3    2.59    0.46
  -1  -5   3    2.76    2.44
   1  -5  -3    3.04    0.37
  -1   5  -3    3.23    0.50
   1   5   3    3.50    0.55
   1   5   3    3.38    3.28
  -1  -5   3    3.52    0.48
  -1  -5   3    3.04    0.36
   1  -5  -3   -3.46    3.60
  -1  -5   3    2.75    0.52
   1  -5  -3    2.15    1.18
  -2  -5  -3    7.87    0.56
   2  -5   3    8.78    0.66
   2   5  -3    7.75    0.73
   2   5  -3    8.79    0.49
   2   5  -3    8.04    0.50
   2  -5   3    8.15    0.80
  -2  -5  -3    8.54    0.80
  -2   5   3    7.78    0.75
   2  -5   3    8.52    0.61
  -2  -5  -3    8.06    0.69
  -2   5   3    8.08    0.77
   2  -5   3    7.19    0.70
  -2  -5  -3    6.90    0.75
   2   5  -3    8.35    0.86
   2   5   3    7.92    0.82
  -2   5  -3    7.45    0.60
  -2   5  -3    7.78    0.80
  -2   5  -3    4.75    4.83
  -2   5  -3    7.79    0.52
   2   5   3    7.42    0.54
  -2  -5   3   12.48    2.26
  -2  -5   3    7.58    0.69
   2  -5  -3   10.74    1.72
   2  -5  -3    8.26    0.47
  -2   5  -3    8.81    0.63
  -2   5  -3    8.37    0.76
   2  -5  -3    2.15    3.72
  -2  -5   3    8.53    0.82
   2  -5  -3    8.98    0.87
  -2  -5   3    7.98    0.77
   2   5   3    7.78    0.76
   2   5   3    8.83    0.70
   2  -5  -3    8.37    0.94
   3  -5   3   12.30    1.13
  -3   5   3   11.60    2.11
   3  -5   3   10.71    0.68
   3  -5   3   10.73    0.50
  -3  -5  -3   10.90    0.78
  -3  -5  -3   12.60    3.98
   3  -5   3   10.48    0.82
   3   5  -3   13.75    3.86
  -3  -5  -3   10.82    0.80
  -3   5   3   10.93    0.56
  -3   5   3    9.32    2.39
   3   5  -3   10.56    0.75
  -3  -5  -3   12.07    1.00
  -3   5   3   11.79    0.95
  -3  -5  -3   11.63    2.96
  -3   5   3   10.82    0.90
   3   5  -3   11.08    1.09
  -3   5  -3   11.17    0.68
  -3  -5   3    8.25    1.54
  -3   5  -3   10.56    2.92
   3  -5  -3    9.88    1.88
  -3  -5   3   11.76    0.98
   3   5   3   10.61    1.08
   3   5   3   11.72    4.08
   3   5   3   10.32    1.00
   3  -5  -3   11.83    1.17
   3  -5  -3   10.24    0.86
   3   5   3   10.28    0.53
  -3  -5   3   11.12    3.08
  -3   5  -3   10.98    0.49
   3  -5  -3    9.47    0.55
  -3   5  -3   10.58    0.89
  -4   5   3   -0.01    0.27
  -4   5   3    0.10    0.28
  -4   5   3    0.83    1.16
   4   5  -3    0.58    0.37
   4  -5   3    0.34    0.28
   4   5  -3    2.10    2.56
   4   5  -3    1.26    0.51
  -4  -5  -3    0.52    0.67
  -4  -5  -3    0.10    0.91
  -4  -5  -3    1.91    2.03
  -4   5   3    0.39    0.23
   4  -5   3    0.60    0.52
  -4  -5  -3    0.59    0.26
  -4  -5  -3    0.31    0.32
   4  -5   3    0.04    0.19
   4   5  -3   -0.14    1.22
   4   5   3   -0.17    0.25
  -4   5  -3    0.41    0.34
   4  -5  -3    0.32    0.24
   4  -5  -3    0.56    0.43
   4  -5  -3    0.60    0.33
  -4  -5   3    3.08    1.84
   4   5   3    0.80    0.45
   4   5   3   -0.30    0.94
   4  -5  -3   -1.42    1.63
  -4  -5   3    0.85    0.68
  -5   5   3   11.19    0.99
  -5   5   3   11.44    1.03
   5   5  -3    2.69    3.74
  -5  -5  -3   10.10    1.04
  -5  -5  -3    9.63    1.35
  -5  -5  -3    9.61    0.74
   5   5  -3   10.85    2.45
  -5  -5  -3    9.74    2.14
   5   5  -3    8.23    1.00
  -5  -5  -3    5.46    2.21
  -5  -5  -3    5.83    2.67
   5  -5   3   13.43    1.22
  -5  -5   3    7.64    2.54
  -5  -5   3    9.49    0.93
  -5  -5   3   10.57    1.09
   5   5   3   11.17    1.62
  -5   5  -3    8.45    0.94
   5   5   3    9.31    1.45
  -6   5   3    4.87    0.84
   6  -5   3    4.36    0.95
  -6  -5  -3    3.55    1.56
   6  -5   3    7.96    1.41
   6   5  -3    4.94    1.22
  -6   5   3    7.35    0.81
   6   5  -3    5.20    1.06
  -6  -5  -3    0.74    2.00
  -6  -5  -3    4.30    0.90
   6  -5  -3    4.77    1.20
   6  -5  -3    2.14    3.27
  -6   5  -3    5.80    0.90
  -6  -5   3    4.22    2.41
   6   5   3    5.76    1.29
  -6  -5   3    5.41    0.91
  -6  -5   3    4.76    0.88
   6   5   3    6.69    1.43
   7   5  -3    0.50    0.78
   7  -5   3    2.08    0.82
   7   5  -3   -1.81    3.54
   7   5  -3    2.26    1.05
   7  -5   3    0.60    0.71
   7   5   3    1.15    0.78
   7  -5  -3    1.80    0.86
   7   5   3    0.22    0.73
   0  -6   3  134.47    3.04
   0  -6   3  131.67    3.23
   0  -6   3  135.62    3.18
   0  -6  -3  133.11    3.34
   0  -6  -3  139.73    2.73
   0   6  -3  132.70    2.54
   0   6  -3  136.16    2.68
   0   6  -3  133.13    3.06
   0   6  -3  130.11    3.10
   0  -6  -3  133.95    2.71
   0   6   3  127.71    2.91
   0   6   3  132.18    3.31
   1  -6   3    1.24    0.38
   1   6  -3    0.36    1.69
  -1  -6  -3    1.54    0.39
  -1   6   3    1.50    0.45
  -1  -6  -3    1.88    0.46
   1   6  -3    1.66    0.43
  -1  -6  -3    0.15    1.39
   1  -6   3    1.58    0.39
   1   6  -3    2.11    0.39
  -1  -6  -3    1.67    0.42
  -1   6   3    0.11    1.07
   1   6  -3    0.42    1.17
   1  -6   3    1.48    0.36
   1  -6   3    1.04    2.30
  -1  -6  -3    1.38    2.34
  -1   6   3    1.16    2.05
   1   6  -3    1.66    0.39
   1  -6   3    2.02    0.42
   1   6   3    0.22    2.76
   1  -6  -3    0.97    1.55
  -1  -6   3    1.36    0.41
   1   6   3    1.99    0.45
  -1  -6   3    1.61    0.45
   1  -6  -3    1.64    0.15
   1   6   3    1.09    0.36
  -1   6  -3    1.69    0.41
  -1  -6   3    1.95    0.49
  -1   6  -3    1.78    0.41
   1  -6  -3    1.53    0.40
   1  -6  -3    1.90    0.46
  -1  -6   3    3.50    2.77
  -1   6  -3    1.54    0.38
   1  -6  -3    0.39    0.95
   1   6   3   -1.12    2.19
   1   6   3    0.53    1.64
   1  -6  -3    1.71    0.36
  -1   6  -3    0.49    1.51
   1  -6  -3    1.72    3.71
  -1   6  -3    1.25    0.31
   2   6  -3   13.63    3.97
   2   6  -3    4.76    0.74
   2  -6   3    4.42    0.44
   2  -6   3    4.69    0.53
   2  -6   3    5.05    0.48
   2   6  -3    4.65    0.33
  -2  -6  -3    4.81    0.43
  -2   6   3    9.98    3.46
  -2   6   3    5.56    0.78
  -2   6   3   12.47    3.99
  -2  -6  -3    9.59    3.46
  -2  -6  -3    5.32    0.74
  -2  -6  -3    9.63    4.48
   2  -6   3    4.57    0.71
   2  -6   3    8.35    4.07
   2   6  -3    4.68    0.42
   2   6  -3    8.76    2.87
   2   6  -3   13.96    4.67
  -2  -6  -3    4.43    0.71
  -2   6  -3    3.58    1.53
   2  -6  -3    4.54    0.42
   2  -6  -3    4.25    0.66
   2  -6  -3   -0.73    3.97
   2   6   3    4.33    0.46
  -2  -6   3   12.12    4.49
  -2   6  -3    4.98    0.53
   2   6   3    4.51    0.68
  -2   6  -3    4.02    0.41
   2   6   3    5.22    0.60
   2  -6  -3    4.99    0.85
   2   6   3    9.26    2.53
  -2   6  -3    9.30    3.78
  -2   6  -3    4.92    0.53
  -2   6  -3    5.52    0.82
  -2  -6   3    4.20    0.72
   2   6   3    4.62    0.76
   2   6   3   13.27    5.85
  -2   6  -3    5.09    0.75
   2  -6  -3    3.81    1.43
  -2  -6   3    5.50    1.96
  -2  -6   3    4.38    0.65
   2  -6  -3   13.41    4.00
  -3  -6  -3    1.83    0.42
   3   6  -3    1.42    0.31
   3  -6   3    1.77    0.27
   3  -6   3    1.98    0.59
  -3  -6  -3    1.43    0.36
   3  -6   3    1.23    0.37
  -3   6   3    1.45    0.45
  -3  -6  -3    5.48    2.75
   3   6  -3    5.96    2.84
  -3   6   3    3.79    1.58
   3  -6   3    1.88    0.43
  -3   6   3    1.36    0.44
   3   6  -3    1.48    0.18
  -3  -6  -3    5.11    2.04
   3   6  -3    2.28    1.68
   3   6  -3    1.13    0.49
  -3   6   3    3.63    1.87
   3   6   3    1.94    0.54
  -3   6  -3    1.19    0.68
  -3   6  -3    1.27    0.35
  -3   6  -3    4.77    2.04
   3   6   3    0.04    0.78
  -3   6  -3    1.76    0.39
  -3  -6   3    1.92    0.94
   3  -6  -3    1.74    0.61
  -3   6  -3    1.97    0.57
   3  -6  -3    4.12    1.74
  -3  -6   3    1.68    0.49
   3   6   3    1.68    0.26
   3  -6  -3    1.23    2.28
  -3   6  -3    1.62    0.26
   3  -6  -3    1.87    0.42
  -3  -6   3    4.26    2.10
   3   6   3    2.01    0.56
  -4  -6  -3    6.67    2.45
   4   6  -3    4.24    0.93
  -4   6   3    5.20    0.81
   4  -6   3    4.71    0.98
   4  -6   3    6.18    0.88
   4  -6   3    4.59    0.49
  -4   6   3    4.23    0.44
   4   6  -3    4.27    0.62
  -4   6   3    3.66    0.70
  -4  -6  -3    7.97    3.43
  -4  -6  -3    4.43    0.85
  -4  -6  -3    4.87    0.72
   4   6  -3    0.75    1.77
  -4  -6   3    6.08    0.99
  -4  -6   3    5.98    2.89
  -4  -6   3    2.94    1.24
   4   6   3    2.76    0.80
   4  -6  -3    4.32    1.01
  -4   6  -3    4.21    0.44
  -4   6  -3    3.93    0.77
   4   6   3    5.53    1.08
  -4   6  -3    2.80    2.08
   5  -6   3    3.25    0.36
  -5  -6  -3    2.94    0.57
  -5   6   3    4.69    0.84
   5   6  -3    3.99    0.73
  -5   6   3    4.61    0.54
   5   6  -3    5.18    1.22
   5  -6   3    3.12    0.87
   5  -6   3    5.19    0.90
   5   6  -3    1.04    1.99
  -5  -6  -3    3.17    0.74
  -5  -6  -3    2.26    1.55
  -5  -6  -3    0.11    1.85
  -5   6   3    4.21    0.75
   5  -6  -3    3.75    0.98
   5   6   3    0.86    1.56
  -5  -6   3    6.19    1.01
   5   6   3    3.16    1.07
   5   6   3    3.96    1.05
  -5  -6   3    3.53    0.74
  -5   6  -3    1.03    1.57
  -5   6  -3    4.63    0.83
  -6  -6  -3    0.05    0.46
   6  -6   3   -0.08    0.55
  -6   6   3   -0.12    0.35
   6  -6   3    0.81    0.48
  -6  -6  -3    0.25    0.38
  -6   6   3    0.26    0.34
   6   6  -3    0.38    0.46
   6   6  -3    0.53    0.53
   6   6  -3   -0.25    2.61
  -6  -6   3   -0.35    0.44
   6   6   3    0.46    0.59
   6  -6  -3   -0.18    0.47
  -6  -6   3   -0.53    0.40
   6   6   3   -0.01    0.47
  -6  -6   3   -0.16    2.01
  -6   6  -3    0.01    0.46
   6  -6  -3    2.32    3.98
   7   6  -3   -0.25    0.60
   7  -6   3   -0.37    0.53
   7  -6   3    0.49    0.73
   7   6  -3   -5.12    4.96
   7   6  -3   -0.74    0.63
   7  -6  -3   -0.01    0.63
   7   6   3    0.33    0.66
   7   6   3    0.35    0.65
   0   7  -3   16.55    0.76
   0  -7  -3   15.91    1.10
   0  -7   3   16.52    1.10
   0  -7  -3   14.38    4.18
   0   7   3   22.62    7.24
   0  -7   3   19.34    6.29
   0   7  -3   16.68    1.03
   0   7  -3   13.58    3.54
   0  -7  -3   16.49    0.85
   0  -7  -3   16.88    0.84
   0   7   3   16.34    1.14
   0   7  -3   16.80    1.03
   0  -7   3   16.78    1.07
   0   7  -3   14.86    4.48
   0   7   3   19.70    4.31
   0  -7  -3   14.88    4.91
   0   7  -3   17.27    0.86
   0  -7  -3   16.31    1.06
   1   7  -3   47.47    1.64
   1  -7   3   46.82    1.71
  -1  -7  -3   44.35    1.90
   1  -7   3   47.17    1.67
   1   7  -3   42.89    1.67
  -1  -7  -3   45.44    1.77
   1  -7   3   43.63    1.76
  -1   7   3   45.74    1.94
  -1  -7  -3   42.95    1.85
  -1  -7   3   46.37    1.95
   1  -7  -3   45.75    1.77
  -1   7  -3   45.34    1.81
  -1   7  -3   59.56    5.58
   1  -7  -3   45.56    1.02
   1   7   3   43.51    1.73
  -1   7  -3   47.51    1.92
  -1  -7   3   44.71    1.80
  -1   7  -3   45.27    1.69
   1  -7  -3   46.30    1.64
   1  -7  -3   45.26    1.95
  -1   7  -3   43.14    1.80
   1   7   3   46.53    1.92
   2   7  -3   14.30    5.16
   2  -7   3    2.72    0.42
   2   7  -3   11.67    3.34
   2  -7   3    3.68    0.60
   2   7  -3    3.88    0.72
   2   7  -3    4.45    0.45
   2  -7   3    4.47    0.72
  -2  -7  -3    5.28    0.85
  -2  -7  -3    9.82    3.85
  -2   7   3   12.98    4.36
  -2  -7  -3    4.74    0.38
  -2  -7  -3   11.10    5.16
  -2   7   3    2.93    0.60
   2  -7   3    4.61    0.49
   2  -7  -3   -0.57    4.58
   2   7   3    3.84    0.73
   2  -7  -3    4.05    0.73
   2   7   3    3.88    0.47
   2  -7  -3   11.16    4.02
  -2  -7   3   13.55    5.59
   2   7   3    3.85    0.75
   2  -7  -3    5.52    1.87
  -2   7  -3    4.18    0.44
   2   7   3    3.82    0.66
  -2  -7   3    5.87    2.15
  -2  -7   3    3.39    0.68
  -2   7  -3    2.61    0.58
   2  -7  -3    3.81    0.43
  -2   7  -3   10.99    4.24
  -2   7  -3    4.78    0.58
   3   7  -3    5.79    2.48
   3   7  -3    4.20    0.33
  -3  -7  -3    5.27    2.08
   3   7  -3    3.89    0.61
   3  -7   3    4.15    0.58
  -3  -7  -3    3.76    0.45
   3  -7   3    4.41    0.43
   3  -7   3    3.66    0.59
   3   7  -3    5.93    1.58
  -3   7   3    4.26    0.74
   3  -7   3    5.04    0.91
  -3   7   3    5.17    2.27
  -3  -7  -3    2.97    0.72
  -3   7   3    4.04    0.75
   3   7  -3    3.75    0.80
   3  -7   3    5.82    2.43
  -3  -7  -3    6.29    3.01
  -3   7  -3    3.15    0.37
   3  -7  -3    4.47    0.93
   3  -7  -3    3.83    0.31
   3   7   3    6.96    1.74
  -3   7  -3    2.75    1.81
   3  -7  -3    0.12    1.99
   3  -7  -3    5.80    2.46
  -3  -7   3    3.97    1.40
  -3   7  -3    3.95    0.61
   3  -7  -3    3.83    0.32
  -3   7  -3    3.99    0.68
  -3  -7   3    3.84    2.16
  -3   7  -3    4.66    0.83
   3   7   3    3.46    0.75
  -3  -7   3    3.95    0.82
   3   7   3    3.45    0.40
   3   7   3    2.95    0.77
  -4  -7  -3    3.43    1.96
   4   7  -3    2.70    0.82
   4   7  -3    3.45    0.55
  -4   7   3    4.41    0.76
  -4   7   3    2.84    0.68
  -4   7   3    2.04    1.82
  -4  -7  -3    1.64    1.72
   4  -7   3    4.05    1.00
  -4  -7  -3    3.10    0.58
  -4  -7  -3    3.82    0.80
   4  -7   3    3.17    0.64
  -4  -7   3    2.23    1.19
  -4   7  -3    3.54    0.54
  -4   7  -3    4.39    0.84
  -4  -7   3    3.20    3.85
   4  -7  -3    0.25    2.24
  -4   7  -3    1.24    1.34
   4   7   3    2.73    0.78
   4   7   3    3.53    0.85
  -4  -7   3    2.92    0.70
   4  -7  -3    4.74    1.07
  -5   7   3    0.71    0.46
  -5  -7  -3    0.58    0.33
   5   7  -3   -0.81    1.67
  -5   7   3    0.56    0.38
   5   7  -3    0.65    0.50
   5  -7   3   -0.02    0.43
  -5  -7  -3    0.63    1.33
   5  -7   3    0.09    0.40
   5   7  -3    0.82    0.33
   5  -7   3    0.66    0.24
  -5  -7  -3   -1.15    1.34
  -5  -7   3    1.01    1.81
   5  -7  -3    0.58    0.50
  -5   7  -3   -1.49    1.59
   5   7   3   -0.74    1.40
  -5   7  -3   -0.47    0.27
   5   7   3    0.33    0.40
  -5  -7   3   -0.10    0.34
  -5  -7   3    0.37    0.70
   5   7   3    0.22    0.33
  -5  -7   3    0.47    0.40
   5  -7  -3    1.05    2.04
   6   7  -3    1.02    0.46
  -6  -7  -3    0.52    0.36
  -6  -7  -3   -0.59    2.18
  -6  -7  -3   -0.34    1.48
   6  -7   3    1.16    0.70
   6   7  -3    1.68    2.90
   6  -7   3    0.65    0.48
  -6   7   3   -0.04    0.41
   6   7  -3   -0.37    0.64
  -6   7   3    0.16    0.39
  -6  -7  -3    0.29    0.49
  -6  -7   3   -3.22    2.23
   6   7   3    1.49    0.67
  -6   7  -3    0.38    0.52
   6  -7  -3    0.19    0.59
  -6  -7   3    0.48    0.44
  -6  -7   3    1.14    0.66
   6   7   3    0.13    0.61
  -7  -7  -3   -0.12    0.57
   7   7   3   -0.09    0.65
   0   8  -3    0.42    0.24
   0  -8  -3   -0.12    0.17
   0  -8   3   -0.13    0.15
   0   8  -3    0.20    0.15
   0   8   3   -0.26    0.15
   0   8  -3    0.06    0.15
   0  -8  -3   -0.69    0.91
   0   8   3    1.35    3.89
   0  -8  -3   -0.13    0.13
   0  -8  -3    0.12    0.15
   0  -8  -3   -0.16    1.46
   0  -8   3    0.92    2.20
  -1   8   3   21.95    1.40
  -1  -8  -3   36.84    6.86
  -1  -8  -3   22.42    0.79
  -1  -8  -3   36.60    6.02
  -1  -8  -3   21.73    1.25
   1  -8   3   22.85    1.25
   1   8  -3   24.89    1.32
   1   8  -3   23.31    1.22
  -1  -8  -3   22.03    1.40
   1  -8   3   24.03    1.21
  -1   8  -3   22.69    1.35
   1  -8  -3   22.42    1.22
   1  -8  -3   23.98    1.30
  -1   8  -3   24.65    1.45
  -1  -8   3   23.42    1.45
   1  -8  -3   22.62    0.76
   1  -8  -3   31.48    4.57
   1   8   3   22.75    1.42
  -1  -8   3   21.85    3.41
   1   8   3   22.83    1.26
  -1   8  -3   22.28    1.20
  -1   8  -3   23.65    1.39
   2   8  -3    1.54    0.36
  -2   8   3    1.47    0.45
   2  -8   3    1.50    1.39
  -2   8   3    1.31    1.41
   2  -8   3    1.78    0.55
   2   8  -3    2.72    1.57
   2  -8   3    1.35    0.37
  -2  -8  -3    1.17    1.14
   2   8  -3    1.42    0.53
   2   8  -3    2.00    1.35
  -2  -8  -3    0.32    1.25
   2  -8   3    2.21    0.39
  -2  -8  -3    2.33    0.66
  -2  -8  -3    1.71    0.26
  -2  -8   3    0.10    1.11
   2   8   3    1.56    0.79
   2  -8  -3    1.87    0.40
  -2   8  -3    1.03    0.41
  -2  -8   3    1.66    0.53
  -2   8  -3    1.60    0.39
   2  -8  -3    0.49    0.63
   2   8   3    0.52    1.32
   2  -8  -3    1.32    0.53
  -2   8  -3    1.32    0.43
   2   8   3    1.94    0.47
  -2  -8   3    1.01    0.82
   2   8   3    1.40    0.36
   2   8   3    1.43    0.45
   2  -8  -3    2.08    1.87
   3  -8   3    2.46    0.42
  -3  -8  -3    2.06    0.37
   3  -8   3    0.63    1.70
   3  -8   3    2.08    0.52
   3  -8   3    2.10    0.43
   3   8  -3    4.28    1.76
   3   8  -3    2.47    0.37
  -3  -8  -3    4.52    2.31
   3  -8   3    2.73    0.70
  -3  -8  -3    2.13    1.95
   3   8  -3    1.27    0.54
  -3  -8  -3    2.73    0.69
  -3   8   3    1.43    0.50
   3   8  -3    6.35    2.02
  -3   8   3    3.31    1.95
   3   8  -3    3.21    2.06
   3   8   3    1.85    0.65
   3   8   3    4.83    1.96
   3  -8  -3    1.74    0.67
  -3  -8   3    6.64    2.96
  -3   8  -3    2.71    0.63
   3   8   3    2.43    0.44
  -3  -8   3    2.45    1.27
   3   8   3    2.23    0.67
  -3   8  -3    1.95    0.47
   3  -8  -3    2.97    2.03
   3  -8  -3    1.45    1.77
  -3   8  -3    2.00    0.48
  -3  -8   3    2.18    0.59
  -3   8  -3    2.52    0.42
  -4   8   3    5.16    2.53
  -4  -8  -3    5.13    3.01
  -4  -8  -3   11.76    1.25
  -4  -8  -3    7.88    2.98
   4  -8   3    9.77    1.46
   4  -8   3    9.87    0.87
   4   8  -3    9.48    1.49
  -4   8   3   11.32    1.03
   4  -8   3    8.26    0.81
  -4   8   3    9.71    1.07
  -4  -8  -3   10.03    0.84
   4  -8  -3   11.32    1.34
   4   8   3   10.39    0.49
   4   8   3    9.67    1.48
  -4  -8   3    4.35    3.00
   4   8   3    8.96    0.42
  -4  -8   3    9.69    1.16
   4   8   3    8.84    1.35
  -4   8  -3    9.67    1.09
  -4   8  -3   11.24    0.88
  -5  -8  -3   -2.19    1.90
   5   8  -3    1.28    2.32
  -5   8   3    1.80    0.60
   5   8  -3    2.15    0.88
   5  -8   3    3.75    0.88
  -5  -8  -3    0.98    1.18
  -5   8   3    2.62    0.68
   5  -8   3    4.04    0.98
  -5  -8  -3    1.91    0.69
  -5  -8   3    1.32    0.89
  -5  -8   3   -0.77    2.06
  -5  -8   3    3.50    0.69
   5   8   3    1.47    0.71
  -5   8  -3    2.85    0.64
   5   8   3    2.35    0.80
   5   8   3   -0.31    1.48
   5  -8  -3    2.12    0.82
   6  -8   3    2.45    0.92
  -6  -8  -3   -0.39    2.09
  -6  -8  -3    3.05    0.86
  -6   8   3    4.24    0.79
   6   8  -3    3.85    1.22
   6   8  -3   -0.64    2.87
  -6  -8  -3    2.19    1.86
   6  -8   3    4.51    0.94
  -6  -8  -3    2.84    0.67
  -6   8  -3    4.37    0.96
   6   8   3    2.20    0.76
  -6  -8   3   -2.01    2.56
   6   8   3    5.72    1.20
  -6  -8   3    3.80    0.79
  -6  -8   3    4.51    0.97
   6  -8  -3    2.58    0.91
  -7  -8  -3    1.02    0.64
  -7  -8   3   -0.16    0.57
  -7   8  -3    1.22    0.74
   0  -9  -3   14.33    0.84
   0   9  -3   13.35    1.05
   0   9  -3   11.93    0.68
   0   9   3   11.97    1.11
   0  -9  -3   19.95    6.40
   0  -9  -3   14.23    1.11
   0  -9   3   12.19    1.04
   0  -9  -3   12.37    0.84
   0   9  -3   12.95    0.86
   1  -9   3   22.40    5.89
   1  -9   3   15.13    1.09
  -1  -9  -3   14.82    1.07
  -1  -9  -3   14.66    4.32
   1   9  -3   15.59    1.06
   1   9  -3   15.67    1.09
  -1   9   3   14.36    1.22
  -1  -9  -3   15.29    0.66
  -1  -9  -3   15.68    1.25
   1  -9   3   15.85    1.00
  -1  -9  -3   12.18    3.85
  -1   9  -3   15.56    1.19
   1  -9  -3   14.77    0.67
  -1  -9   3   16.17    1.26
   1  -9  -3   15.25    1.08
  -1  -9   3   21.83    4.39
   1  -9  -3   14.21    1.04
  -1  -9   3   10.08    2.61
  -1   9  -3   14.00    1.13
   1   9   3   14.76    1.20
   1  -9  -3   15.99    3.48
   1   9   3   15.54    1.09
  -1   9  -3   15.02    1.01
  -2  -9  -3   -0.36    0.28
  -2   9   3   -0.07    0.19
  -2  -9  -3   -0.22    1.38
   2  -9   3   -0.25    0.11
   2  -9   3   -0.14    1.50
  -2  -9  -3    0.35    1.14
   2   9  -3    0.00    0.23
   2  -9   3    0.00    0.31
   2   9  -3    0.05    1.14
   2   9  -3    0.38    0.65
   2  -9   3   -0.04    0.21
   2   9  -3    0.16    0.30
   2  -9  -3   -0.11    0.31
   2   9   3    0.20    0.25
  -2   9  -3   -0.24    0.27
  -2   9  -3   -0.13    0.20
   2   9   3    0.26    0.26
  -2  -9   3   -0.11    0.55
   2   9   3    0.19    0.25
   2   9   3   -0.96    1.10
   2  -9  -3   -0.25    0.35
  -2  -9   3   -0.25    0.16
   2   9   3   -0.13    0.60
   2   9   3    0.07    0.31
   2   9   3   -1.06    0.81
   2  -9  -3    0.58    1.16
  -2   9  -3    0.19    0.24
   2  -9  -3    0.17    0.20
  -2  -9   3   -0.24    1.38
  -3   9   3   14.79    4.12
  -3   9   3   26.78    1.72
   3   9  -3   27.21    4.24
   3  -9   3   26.40    1.77
  -3   9   3   24.40    1.61
  -3  -9  -3   15.51    4.61
   3  -9   3   26.92    1.25
   3   9  -3   19.22    3.36
   3   9  -3   24.59    1.08
   3   9  -3   22.78    1.75
  -3  -9  -3   25.85    0.96
  -3  -9  -3   19.18    3.97
   3  -9   3   24.83    1.13
   3   9  -3   22.37    3.71
  -3  -9  -3   25.01    1.77
  -3   9  -3   25.89    1.48
   3  -9  -3   16.07    4.22
   3  -9  -3   25.30    1.82
  -3   9  -3   25.11    1.15
  -3  -9   3   28.05    1.87
   3   9   3   25.40    1.15
   3   9   3   22.42    1.66
   3   9   3   23.47    1.37
  -3   9  -3   25.51    1.70
  -3  -9   3   19.63    5.53
   3   9   3   21.72    3.74
   3  -9  -3   25.37    1.07
   3   9   3   24.02    1.76
   4   9  -3    2.88    0.80
  -4  -9  -3    4.67    0.98
  -4  -9  -3    4.07    0.57
  -4  -9  -3    3.22    2.49
  -4  -9  -3    2.90    1.86
  -4   9   3    3.38    0.78
   4  -9   3    3.95    0.68
  -4   9   3    1.52    2.35
  -4   9   3    4.15    0.81
   4  -9   3    4.10    0.98
  -4  -9   3    3.14    2.29
   4   9   3    3.58    0.92
  -4   9  -3    4.10    0.70
  -4   9  -3    4.16    0.89
   4  -9  -3    1.91    1.61
   4  -9  -3    3.69    0.97
   4   9   3    4.27    0.96
   4   9   3    4.77    0.42
  -4  -9   3    5.20    0.99
  -5   9   3    0.87    0.48
   5   9  -3    2.79    2.70
  -5  -9  -3    1.00    0.74
   5  -9   3   -0.34    0.41
   5   9  -3    1.50    0.73
  -5   9   3    1.60    0.61
   5  -9   3    1.29    0.50
  -5  -9  -3    1.63    2.34
  -5  -9  -3    0.56    1.57
   5   9   3    0.23    0.46
   5   9   3    0.53    0.64
  -5  -9   3    1.19    1.03
  -5  -9   3    3.96    2.88
   5  -9  -3    0.88    0.61
  -6   9   3    0.63    0.61
  -6   9   3    0.47    0.47
  -6  -9  -3    0.17    1.82
   6   9  -3    0.86    0.87
   6   9  -3   -0.78    3.16
   6  -9   3    0.52    0.56
   6  -9   3    2.38    1.16
  -6  -9   3   -0.15    0.48
   6   9   3    0.24    0.58
  -6   9  -3    0.86    0.58
  -6  -9   3    0.08    0.54
  -6  -9   3    0.83    3.40
   6  -9  -3    1.30    0.86
   6   9   3   -0.08    0.83
  -7  -9  -3    0.30    0.73
  -7  -9   3    1.10    0.74
  -7   9  -3    0.78    0.63
   0  10  -3   23.95    1.26
   0 -10   3   23.21    1.51
   0 -10  -3   23.66    1.52
   0 -10   3   29.44    5.61
   0  10  -3   26.64    1.55
   0 -10  -3   23.67    1.15
   0 -10  -3   22.11    1.32
   0  10  -3   20.81    0.92
   0 -10  -3   20.89    3.62
   0  10   3   21.15    1.55
   0 -10  -3   23.44    4.45
  -1 -10  -3   15.79    0.68
  -1 -10  -3   19.02    1.43
   1 -10   3   16.90    1.08
   1 -10   3   16.16    1.21
  -1  10   3   16.25    1.38
   1  10  -3   15.22    1.13
   1  10  -3   16.85    1.21
  -1 -10  -3    9.11    3.08
  -1  10  -3   15.80    1.27
   1 -10  -3   16.50    1.18
   1 -10  -3   11.04    3.76
   1  10   3   16.52    1.37
   1 -10  -3   16.44    1.17
  -1 -10   3   15.67    1.31
  -1 -10   3    9.82    4.33
   1 -10  -3   16.68    0.78
  -1  10  -3   15.70    1.03
  -1  10  -3   15.41    1.25
  -2  10   3   14.81    1.27
   2  10  -3   13.57    1.24
   2 -10   3   13.98    1.07
  -2  10   3   13.92    1.28
  -2 -10  -3   14.75    1.34
   2 -10   3   14.78    1.19
   2 -10   3    9.67    4.30
   2  10  -3   15.02    1.03
   2 -10  -3   15.34    1.04
  -2 -10   3   14.66    1.35
   2  10   3   13.90    1.26
   2 -10  -3   15.87    1.33
  -2  10  -3   12.59    1.15
   2  10   3   12.72    1.15
  -2  10  -3   12.86    1.21
   2  10   3   13.79    1.21
  -2 -10   3    8.94    4.15
   3  10  -3    0.90    0.56
   3  10  -3    7.84    2.88
   3 -10   3    0.90    0.54
  -3  10   3    1.47    0.54
  -3 -10  -3    2.21    0.74
   3 -10   3    2.16    0.47
  -3 -10  -3    3.07    2.34
   3  10  -3    1.34    0.33
   3  10  -3    2.88    2.03
   3 -10   3    1.42    0.38
   3  10  -3    6.03    2.55
  -3  10   3    2.49    0.74
   3 -10   3    4.90    3.06
  -3 -10  -3    5.11    2.66
   3  10   3    1.32    0.36
   3 -10  -3    0.85    0.53
  -3  10  -3    1.63    0.40
  -3 -10   3    2.51    2.68
   3  10   3    1.17    0.45
  -3  10  -3    1.36    0.54
  -3 -10   3    3.89    1.73
  -3 -10   3    0.97    0.56
   3  10   3   -0.35    0.84
   3  10   3    0.92    0.53
   3 -10  -3    6.19    3.04
   3  10   3    4.07    2.68
   3  10   3    1.56    0.61
   3 -10  -3    2.23    0.40
  -3  10  -3    1.54    0.50
   4 -10   3    3.06    0.92
   4 -10   3    2.79    0.55
  -4 -10  -3    2.94    0.40
   4  10  -3    2.63    0.85
  -4  10   3    2.68    0.69
  -4 -10  -3    3.07    2.28
  -4 -10  -3    2.75    2.07
  -4  10   3    4.15    0.93
  -4 -10  -3    2.89    0.80
   4 -10   3    3.54    0.59
   4  10   3    3.15    0.41
  -4  10  -3    2.44    0.69
   4  10   3    3.65    0.97
   4  10   3    3.10    0.82
  -4 -10   3    6.46    3.55
  -4 -10   3    2.76    1.44
   4 -10  -3    5.47    2.97
   4  10   3    2.87    0.42
  -4 -10   3    1.50    0.66
  -4  10  -3    2.73    0.66
   5 -10   3    0.75    0.47
   5  10  -3    0.08    0.45
  -5 -10  -3    0.32    0.53
   5  10  -3    0.03    2.52
  -5  10   3    0.85    0.45
  -5  10   3   -0.05    0.42
   5 -10   3    0.09    0.35
  -5 -10  -3    1.04    2.33
  -5 -10  -3    0.84    1.99
   5 -10  -3   -0.01    0.41
  -5 -10   3   -0.27    0.97
  -5 -10   3    2.02    2.64
  -5  10  -3   -0.04    0.44
  -5 -10   3    0.07    0.50
   5  10   3    0.54    0.58
   5  10   3    0.10    0.39
  -6 -10  -3   -1.93    1.61
   6  10  -3    0.53    0.82
  -6  10   3    0.63    0.57
   6  10  -3    1.48    4.62
   6 -10   3   -1.29    0.45
  -6 -10  -3    1.67    2.83
  -6 -10  -3    0.19    0.53
   6  10   3    0.01    0.53
  -6 -10   3   -0.48    0.49
  -6  10  -3    0.01    0.42
  -6 -10   3   -0.77    0.41
   6 -10  -3    0.11    0.68
  -6 -10   3   -1.21    3.37
  -7 -10  -3   -0.68    0.64
  -7 -10   3    0.01    0.80
   0  11   3   20.47    1.59
   0 -11   3   17.76    5.73
   0  11  -3   22.46    1.51
   0 -11  -3   22.29    1.22
   0 -11  -3   21.81    1.52
   0  11  -3   22.47    0.94
   0  11  -3   21.69    1.49
   0 -11   3   20.72    1.51
   0 -11  -3   22.77    1.15
  -1 -11  -3   18.07    0.72
   1 -11   3   14.00    5.42
  -1 -11  -3   10.05    4.25
   1 -11   3   17.33    1.10
   1  11  -3   17.46    1.29
  -1  11   3   18.40    1.52
   1  11  -3   17.68    1.30
   1 -11   3   19.49    1.40
  -1  11   3   16.62    1.35
  -1 -11  -3   18.53    1.49
  -1  11  -3   17.58    1.44
   1 -11  -3   18.59    0.86
  -1 -11   3   10.35    4.41
  -1  11  -3   17.15    1.39
  -1  11  -3   17.20    1.10
   1 -11  -3   18.02    1.26
   1 -11  -3   11.07    4.05
   1 -11  -3   17.87    1.31
   1  11   3   17.40    1.46
  -1 -11   3   16.26    1.46
  -2  11   3   42.69    2.32
   2 -11   3   43.02    1.93
  -2  11   3   44.53    2.32
   2 -11   3   41.48    7.06
   2 -11   3   45.63    2.13
  -2 -11  -3   44.99    2.45
   2  11  -3   41.13    2.19
  -2 -11  -3   29.67    5.77
   2  11  -3   45.06    1.89
   2 -11  -3   42.62    2.22
  -2  11  -3   42.67    2.22
  -2  11  -3   44.84    2.33
   2  11   3   43.27    2.33
   2  11   3   41.50    2.21
  -2 -11   3   41.75    2.37
   2 -11  -3   31.41    5.77
  -2 -11   3   28.70    6.07
   2 -11  -3   45.22    1.96
   3  11  -3    3.14    2.54
  -3 -11  -3    2.33    1.94
   3 -11   3    3.94    0.68
   3 -11   3    3.43    0.92
   3  11  -3    4.13    0.65
  -3  11   3    2.41    0.67
   3 -11   3    3.68    0.59
   3  11  -3    3.73    2.07
   3 -11   3    3.91    2.68
   3  11  -3    4.19    0.92
  -3 -11  -3    3.81    0.95
  -3 -11  -3    2.97    2.02
  -3  11   3    2.64    0.76
   3 -11  -3    3.19    2.44
  -3 -11   3    4.54    1.03
   3 -11  -3    3.45    0.90
   3  11   3    3.36    0.79
  -3  11  -3    3.15    0.58
   3  11   3    4.86    0.97
  -3  11  -3    3.14    0.78
   3 -11  -3    3.33    0.60
  -3  11  -3    4.73    0.99
  -3 -11   3   -0.06    2.72
   3  11   3    3.56    0.63
  -4  11   3   10.66    1.26
   4 -11   3    8.22    0.59
  -4 -11  -3    8.24    1.42
   4 -11   3    6.31    0.74
   4 -11   3    9.15    1.49
  -4  11   3    8.17    1.20
   4  11  -3    6.76    1.29
  -4 -11  -3    4.27    3.00
   4  11  -3    7.67    0.60
   4 -11  -3    8.11    1.45
   4  11   3    8.15    1.44
   4  11   3    5.50    1.16
  -4 -11   3    8.79    1.43
   4  11   3    6.84    0.79
   4  11   3    7.82    0.63
  -4  11  -3    7.18    1.23
  -5 -11  -3    5.14    1.14
  -5  11   3    6.64    1.11
   5  11  -3    0.75    2.64
  -5 -11  -3    2.32    2.46
  -5  11   3    5.44    1.08
   5  11  -3    5.88    1.33
   5 -11   3    4.92    1.15
  -5 -11  -3    4.49    3.36
   5 -11   3    4.08    0.76
  -5  11  -3    8.08    1.39
   5  11   3    3.68    0.99
  -5 -11   3    6.14    1.31
  -5 -11   3    4.44    5.00
  -5 -11   3    2.48    1.56
   5 -11  -3    4.74    1.34
   6  11  -3    4.37    1.24
   6 -11   3    4.35    1.10
  -6  11   3    6.49    1.31
  -6 -11  -3    3.71    1.04
  -6 -11  -3    2.49    3.21
  -6 -11   3    3.66    0.94
  -6 -11   3   -0.62    3.26
   6 -11  -3    4.57    1.26
   6  11   3    4.97    1.26
  -6  11  -3    5.13    1.00
  -6 -11   3    4.07    1.07
  -7 -11  -3    1.67    0.98
  -7 -11   3    0.57    0.89
  -7  11  -3    1.85    0.94
   0 -12   3   11.19    1.17
   0 -12   3    4.28    2.87
   0 -12  -3    9.06    0.87
   0  12  -3   11.15    1.11
   0  12  -3   10.02    0.93
   0  12   3   10.75    1.27
   0 -12  -3   11.43    0.82
   0 -12  -3    9.04    1.06
   0  12   3   11.11    1.13
   1 -12   3    7.66    1.13
  -1 -12  -3    6.92    0.40
   1  12  -3    7.28    0.88
  -1 -12  -3    2.32    1.92
   1  12  -3    5.29    0.87
  -1 -12  -3    8.22    1.29
  -1  12   3    6.84    1.10
   1 -12   3    7.36    0.76
   1 -12   3    3.15    2.68
  -1  12   3    5.22    1.05
  -1 -12  -3    8.18    3.87
   1  12   3    6.13    0.95
   1 -12  -3    6.34    0.93
   1 -12  -3    7.51    0.62
   1 -12  -3    5.01    2.70
   1 -12  -3    7.53    1.13
   1  12   3    5.91    0.96
  -1  12  -3    5.94    1.03
  -1  12  -3    6.26    1.23
   1  12   3    4.64    1.03
  -1 -12   3    5.51    3.46
  -1 -12   3    7.38    1.24
  -2 -12  -3    6.61    3.87
  -2 -12  -3   10.11    1.25
   2  12  -3    9.50    1.16
   2 -12   3    9.94    1.01
  -2 -12  -3    7.58    3.22
  -2  12   3    9.33    1.40
  -2  12   3   10.60    1.25
   2  12  -3    9.61    0.98
   2 -12   3    9.66    1.03
   2 -12   3   12.65    5.49
  -2  12  -3   11.38    1.25
   2 -12  -3   11.20    4.36
   2  12   3   10.39    1.00
  -2  12  -3    9.10    1.11
  -2 -12   3    6.13    2.26
   2 -12  -3    9.85    1.10
  -2 -12   3   11.36    4.96
   2 -12  -3    9.72    1.00
  -2 -12   3    9.84    1.22
   2  12   3    8.72    1.31
   2  12   3    9.12    1.30
   3 -12   3    5.60    4.13
  -3  12   3    7.76    1.26
   3  12  -3    6.96    1.89
  -3  12   3    5.19    1.01
   3  12  -3    6.57    0.75
   3 -12   3    6.86    1.19
   3 -12   3    6.47    0.80
   3  12  -3    4.76    2.44
   3  12  -3    4.95    2.69
  -3 -12  -3    7.76    1.32
   3 -12   3    6.98    0.67
  -3 -12  -3    2.59    3.06
   3  12   3    4.73    0.73
   3  12   3    5.65    2.19
  -3 -12   3    3.79    2.59
  -3  12  -3    5.35    1.05
  -3  12  -3    6.49    1.05
   3  12   3    6.42    1.16
   3 -12  -3    4.44    2.83
   3 -12  -3    6.41    1.17
   3 -12  -3    7.35    0.75
  -3 -12   3    7.15    1.31
   4 -12   3    0.27    0.25
   4  12  -3    0.59    0.26
   4 -12   3    0.56    0.35
   4 -12   3    0.81    0.61
  -4 -12  -3    0.45    0.57
  -4 -12  -3   -0.47    1.63
  -4 -12  -3   -0.49    2.38
   4 -12   3    2.42    2.75
  -4  12   3    0.81    0.53
   4  12  -3    0.48    0.64
   4  12  -3    1.26    2.12
  -4  12   3    1.27    0.62
   4  12  -3   -0.05    1.00
   4  12   3    0.67    1.11
  -4 -12   3   -0.08    0.99
   4  12   3    0.21    0.34
   4 -12  -3    1.74    2.19
   4 -12  -3    1.41    0.71
   4  12   3    1.22    0.70
  -4 -12   3   -0.20    0.53
  -4  12  -3    0.28    0.43
  -5 -12  -3    3.03    0.77
   5  12  -3    2.32    0.81
   5 -12   3    1.71    0.72
   5  12  -3   -0.27    3.45
  -5 -12  -3    1.37    2.35
  -5 -12  -3    0.05    2.39
  -5  12   3    1.63    0.67
  -5  12   3    2.04    0.76
  -5 -12   3    1.68    3.44
  -5 -12   3    0.09    2.19
   5 -12  -3    1.16    0.81
  -5  12  -3    2.88    0.97
  -5 -12   3    4.18    1.08
   5  12   3    1.66    0.70
  -6 -12  -3   -0.29    3.37
  -6 -12  -3   -0.77    1.70
  -6 -12  -3    0.93    0.91
  -6  12  -3    2.73    0.90
  -6 -12   3   -0.98    4.04
  -6 -12   3    3.66    1.06
   0 -13   3    0.12    2.33
   0 -13  -3    1.01    0.34
   0 -13  -3    0.62    1.04
   0  13   3    2.31    0.72
   0 -13   3    1.04    0.47
   0  13  -3    0.48    0.46
   0 -13  -3    0.88    0.47
   0  13   3    0.50    0.36
   0  13  -3    0.61    0.38
   0 -13  -3    0.78    1.64
   1  13  -3    2.58    0.73
  -1 -13  -3    3.99    0.91
   1  13  -3    2.04    0.61
   1 -13   3   14.88    5.87
  -1 -13  -3    4.37    2.32
   1 -13   3    4.06    0.90
  -1  13   3    3.04    0.80
  -1 -13  -3    7.46    3.82
  -1  13   3    2.78    0.91
   1  13   3    3.03    0.73
  -1  13  -3    1.32    0.56
   1 -13  -3    7.10    3.71
   1 -13  -3    3.62    0.71
   1 -13  -3    3.00    0.48
   1  13   3    2.80    0.70
   1 -13  -3    4.67    2.28
   1 -13  -3    2.76    0.77
  -1 -13   3    1.85    0.60
   1  13   3    2.76    0.84
  -1 -13   3    8.37    4.49
  -1 -13   3    3.35    1.59
  -2  13   3    4.72    0.96
   2 -13   3    6.07    1.01
   2  13  -3    5.79    0.94
   2 -13   3    7.35    1.14
   2 -13   3    3.95    3.74
   2  13  -3    4.91    0.98
  -2  13   3    5.06    1.16
  -2 -13  -3    0.69    2.28
   2  13   3    5.51    1.13
   2 -13  -3    6.23    1.12
   2 -13  -3    7.05    0.89
   2  13   3    6.05    0.94
  -2  13  -3    4.80    1.14
   2  13   3    6.22    1.27
   2 -13  -3    2.69    3.11
  -2 -13   3    7.66    1.62
  -2 -13   3    0.19    2.69
   3 -13   3    5.58    1.12
  -3  13   3    4.83    1.01
  -3 -13  -3    1.08    2.54
  -3 -13  -3    3.85    1.03
   3 -13   3    4.40    0.81
   3  13  -3    0.27    2.16
   3  13  -3    4.80    1.09
   3  13  -3    3.90    2.31
   3  13  -3    4.80    0.80
   3 -13   3    2.93    3.62
  -3  13   3    5.13    1.05
   3 -13   3    4.02    0.59
   3  13   3    2.79    1.66
  -3  13  -3    4.85    1.08
   3  13   3    3.92    0.93
  -3 -13   3    5.62    1.34
   3  13   3    1.47    1.54
   3 -13  -3   -0.10    2.19
   3  13   3    3.45    0.71
   3 -13  -3    5.43    0.84
   3 -13  -3    5.21    1.06
  -3 -13   3   -0.26    3.15
   4 -13   3    4.97    1.13
  -4 -13  -3    0.14    1.80
   4  13  -3    4.15    1.00
   4 -13   3   -0.46    2.59
  -4 -13  -3    1.65    2.81
   4 -13   3    3.57    0.53
   4  13  -3    3.31    0.57
  -4 -13  -3    2.98    0.93
   4  13  -3    4.35    2.12
   4 -13   3    4.28    0.68
   4  13  -3    2.46    2.65
  -4  13   3    3.41    0.84
  -4  13   3    3.41    0.90
   4  13   3    2.95    0.58
  -4 -13   3    3.83    1.12
   4  13   3    3.66    0.87
   4 -13  -3    3.87    1.04
  -4 -13   3    1.18    1.44
  -4 -13   3    4.25    3.95
   4 -13  -3    3.44    3.18
  -4  13  -3    4.17    1.08
   4  13   3    3.88    2.12
  -5  13   3    1.65    0.77
   5  13  -3    1.34    0.84
  -5 -13  -3    0.51    3.14
  -5 -13  -3    2.07    0.88
  -5  13   3    1.75    0.76
   5 -13   3    3.80    1.16
  -5 -13  -3   -1.12    1.85
  -5 -13   3    1.88    0.75
  -5 -13   3    1.08    1.40
   5  13   3    1.87    0.87
  -5  13  -3    1.87    0.78
   5 -13  -3    1.67    1.35
  -5 -13   3    2.57    3.88
  -6 -13   3   13.79    2.24
  -6  13  -3   12.94    1.81
   0 -14  -3   29.26    1.34
   0 -14   3   32.39    2.13
   0 -14  -3   20.58    6.40
   0 -14  -3   28.83    2.03
   0  14  -3   32.03    1.81
   0  14   3   27.93    1.95
   0 -14   3   18.18    6.74
   0  14  -3   30.84    2.05
  -1  14   3    1.50    0.76
  -1  14   3    1.29    0.74
   1  14  -3    2.41    0.73
   1  14  -3    2.36    0.62
   1 -14   3    0.68    2.49
   1 -14   3    3.28    0.82
   1 -14  -3    1.99    2.40
   1  14   3    1.84    0.67
  -1 -14   3    0.18    2.59
   1 -14  -3    0.61    0.91
   1 -14  -3    2.55    0.74
   1  14   3    2.06    0.62
  -1  14  -3    2.30    1.19
   1  14   3    2.54    0.73
   1 -14  -3    4.03    0.45
   2  14  -3    1.69    0.58
  -2  14   3    1.75    0.68
  -2 -14  -3    1.00    2.88
  -2  14   3    1.69    0.79
   2 -14   3   -0.64    2.51
  -2 -14  -3    0.91    1.82
   2 -14   3    2.01    0.61
   2 -14   3    1.87    0.63
  -2 -14  -3    1.02    0.61
   2 -14  -3    3.00    0.78
   2 -14  -3    2.50    0.65
  -2 -14   3    2.71    0.88
   2  14   3    1.41    0.61
  -2 -14   3    0.23    0.97
   2  14   3    3.15    0.81
  -2  14  -3    2.16    0.74
   2  14   3   -0.95    2.70
  -2 -14   3    0.16    2.50
   2 -14  -3   -0.11    2.32
  -3 -14  -3    0.04    2.29
   3  14  -3   -0.01    0.34
   3  14  -3   -0.51    1.71
  -3  14   3    0.00    0.50
   3 -14   3    1.32    0.42
   3  14  -3    0.82    1.87
  -3 -14  -3    0.67    0.70
  -3 -14  -3    1.26    1.66
   3  14  -3    0.14    0.53
   3 -14   3    0.92    0.33
  -3  14   3    0.52    0.49
   3 -14   3    1.01    3.53
   3 -14   3    0.17    0.37
   3 -14  -3   -0.44    2.87
   3  14   3    0.96    0.56
  -3 -14   3   -0.75    1.93
  -3 -14   3    0.33    0.47
  -3  14  -3    0.55    0.51
  -3 -14   3    0.34    0.96
   3  14   3    0.86    0.47
   3 -14  -3   -0.26    0.38
   3  14   3    0.96    1.69
  -4 -14  -3    0.06    1.40
   4  14  -3    0.17    2.01
   4 -14   3    1.40    0.70
   4  14  -3    1.73    0.83
   4 -14   3   -1.00    2.80
  -4 -14  -3    0.95    0.75
  -4 -14  -3    0.42    3.01
   4  14  -3    4.18    3.06
  -4  14   3    3.12    0.91
  -4  14   3    3.48    0.97
   4  14   3    2.80    0.88
  -4 -14   3   -0.35    2.35
  -4 -14   3    2.25    1.05
   4  14   3    3.57    0.99
  -4 -14   3    0.45    1.09
   4 -14  -3    1.72    0.68
  -4  14  -3    2.52    0.89
   4  14   3    2.09    2.36
   4 -14  -3    0.91    3.05
   5  14  -3    5.85    1.34
  -5  14   3    4.81    1.11
  -5  14   3    6.70    1.29
  -5 -14  -3    4.63    1.30
   5 -14   3    2.94    1.03
  -5 -14   3    4.24    1.03
  -5  14  -3    5.83    1.23
  -5 -14   3    1.03    4.19
   5  14   3    4.80    1.20
   5 -14  -3    4.66    1.31
  -6 -14  -3    3.15    3.87
  -6 -14   3   -4.39    4.66
   0 -15   3   10.79    5.78
   0  15  -3   13.18    1.23
   0 -15  -3   12.68    5.44
   0 -15   3   11.74    1.45
   0  15  -3   13.59    1.47
   0  15   3   12.04    1.32
   0  15   3   11.53    1.71
   0 -15  -3   12.62    0.85
   1  15  -3    1.15    0.52
  -1 -15  -3    1.22    0.65
  -1  15   3    0.12    0.45
   1  15  -3   -0.10    0.40
  -1 -15  -3    0.45    2.37
   1 -15   3   -2.54    2.14
  -1  15   3    0.66    0.59
   1 -15   3    1.42    0.61
   1 -15  -3   -0.21    0.40
   1  15   3    0.69    0.52
   1 -15  -3    0.53    0.47
   1  15   3   -0.06    0.35
   1 -15  -3   -0.27    2.54
  -1 -15   3    0.55    2.27
   1 -15  -3    0.48    1.09
  -1 -15   3    0.57    0.59
  -1  15  -3    1.52    0.65
   1  15   3   -0.18    0.38
  -2 -15  -3    0.42    1.56
   2  15  -3    2.88    0.84
  -2  15   3    2.24    0.76
   2 -15   3    2.33    0.69
   2 -15   3   -1.70    2.67
   2  15  -3    1.61    0.65
  -2  15   3    3.50    0.96
   2 -15   3    3.20    0.83
  -2 -15  -3    0.63    2.67
  -2 -15  -3    2.94    0.91
  -2 -15   3    1.16    3.59
   2 -15  -3    3.17    0.78
  -2 -15   3    1.93    0.76
  -2  15  -3    1.99    0.77
   2  15   3    1.35    0.58
   2  15   3    3.16    0.71
   2 -15  -3    2.12    0.74
  -2 -15   3    1.02    1.17
   3  15  -3    0.65    0.49
   3 -15   3    1.36    0.45
  -3  15   3    0.77    0.60
   3  15  -3   -1.09    2.01
   3  15  -3    0.83    0.45
  -3  15   3    1.84    0.83
   3 -15   3    1.24    0.62
   3  15  -3    0.62    1.87
  -3 -15  -3    0.71    0.62
  -3 -15  -3    2.08    3.31
   3 -15   3    0.31    3.33
  -3 -15  -3    0.29    1.52
   3 -15   3    1.49    0.59
   3  15   3    0.71    0.50
  -3 -15   3   -0.61    0.98
  -3 -15   3   -1.20    2.62
  -3 -15   3    1.51    0.78
   3 -15  -3    0.97    0.60
   3  15   3    1.50    0.57
  -3  15  -3    1.23    0.66
   3 -15  -3    0.40    2.66
   3 -15  -3    0.86    0.49
   4 -15   3    2.42    0.91
  -4 -15  -3    1.27    3.27
  -4  15   3    0.94    0.66
  -4 -15  -3   -1.12    1.27
  -4 -15  -3    1.87    0.84
  -4  15   3    2.35    1.10
   4  15  -3    3.89    3.24
   4 -15   3   -1.52    3.01
   4 -15  -3    1.92    0.90
  -4  15  -3    1.37    0.88
  -4 -15   3    1.85    0.80
   4  15   3    1.55    0.59
  -4 -15   3   -0.12    1.09
   4 -15  -3   -1.01    3.00
  -4 -15   3    1.91    3.61
  -5 -15  -3   -2.32    1.89
  -5 -15  -3   -0.91    3.60
  -5  15   3    2.28    0.83
   5 -15   3    2.50    0.91
   5 -15  -3    2.17    1.00
  -5 -15   3   -1.49    5.39
  -6 -15  -3   -0.97    2.70
   0 -16  -3   -1.28    2.21
   0 -16  -3   -0.50    1.08
   0  16  -3    1.92    0.61
   0  16   3    1.00    0.67
   0 -16  -3    1.51    0.75
   0 -16   3    1.99    0.87
   0  16  -3    1.86    0.70
   0 -16   3    0.28    2.25
   0 -16  -3    1.29    0.35
   0  16   3    1.22    0.63
   1  16  -3    1.97    0.64
  -1 -16  -3    2.08    0.69
  -1  16   3    1.26    0.70
   1 -16   3    1.51    0.70
   1  16  -3    0.96    0.57
   1 -16   3   -1.10    3.18
  -1  16   3    0.74    0.61
  -1 -16  -3    0.45    2.12
  -1 -16  -3    1.13    1.28
  -1  16  -3    0.95    0.55
   1  16   3    2.19    0.76
  -1  16  -3    1.23    0.53
   1 -16  -3    0.96    0.52
   1 -16  -3    0.92    0.51
   1  16   3    0.36    0.60
   1 -16  -3   -0.25    0.78
  -1 -16   3    1.58    0.74
  -1 -16   3    0.07    3.55
   1 -16  -3    1.17    2.61
   1  16   3    1.66    0.65
   2  16  -3   -0.12    0.47
  -2 -16  -3   -0.42    1.31
   2  16  -3    1.18    0.59
   2 -16   3    0.50    0.52
  -2 -16  -3    0.05    2.75
  -2  16   3    0.31    0.49
   2 -16   3   -0.60    2.83
  -2  16   3    0.61    0.55
   2  16   3    1.51    0.59
  -2  16  -3    0.41    0.44
   2 -16  -3   -0.04    0.56
   2 -16  -3    0.04    0.47
  -2 -16   3    0.35    0.54
  -2 -16   3    0.71    2.69
   2 -16  -3   -1.63    2.19
   3  16  -3    1.27    0.66
   3 -16   3   -1.50    2.85
  -3 -16  -3   -1.45    1.19
  -3 -16  -3    0.31    0.54
  -3  16   3    0.52    0.77
  -3  16   3    0.61    0.63
   3 -16   3    0.30    0.50
   3  16  -3    0.37    0.46
  -3 -16  -3    0.78    2.90
   3 -16   3    0.87    0.54
   3  16  -3   -1.16    2.43
   3 -16  -3    1.22    0.67
  -3 -16   3    0.70    0.75
   3 -16  -3    0.98    0.61
  -3  16  -3    0.77    0.58
   3  16   3    0.02    0.59
   3 -16  -3    0.15    3.07
   3  16   3    0.34    0.47
  -3 -16   3   -0.37    3.78
   4  16  -3    2.46    0.87
  -4 -16  -3    4.78    1.31
  -4  16   3    5.75    1.23
   4 -16   3   -0.44    3.41
  -4 -16  -3   -0.19    1.83
  -4  16   3    4.60    1.10
   4 -16   3    3.48    1.00
  -4 -16  -3    0.79    3.32
   4  16   3    4.46    1.15
   4 -16  -3    4.81    1.23
  -4 -16   3   -2.37    6.27
  -4  16  -3    4.08    0.91
  -4 -16   3    3.10    0.98
   4 -16  -3    1.17    4.49
  -5 -16  -3    0.14    2.25
  -5 -16   3    1.66    5.03
   0  17   3   15.24    1.74
   0 -17   3   16.89    1.75
   0 -17  -3   13.53    1.64
   0  17  -3   15.20    1.65
   0 -17  -3    5.15    4.03
   0  17  -3   12.97    1.35
   0  17   3   12.80    1.47
  -1 -17  -3   -2.64    2.52
  -1 -17  -3    0.56    0.65
   1 -17   3    0.89    0.62
  -1  17   3    0.46    0.74
   1 -17   3    0.30    3.05
  -1  17   3    0.67    0.68
  -1 -17  -3   -0.15    1.21
   1  17  -3    1.17    0.71
   1  17  -3    1.42    0.69
  -1  17  -3    0.35    0.56
   1 -17  -3    0.83    1.17
   1 -17  -3    0.82    0.55
   1 -17  -3   -0.29    3.28
  -1 -17   3   -1.71    3.81
  -1 -17   3    0.60    0.53
   1 -17  -3    0.88    0.54
   1  17   3    0.93    0.60
  -1  17  -3    0.21    0.47
   1  17   3    0.47    0.55
   2 -17   3   -2.56    3.27
   2  17  -3    0.87    0.65
  -2 -17  -3   -0.83    1.33
   2 -17   3   -0.26    0.52
  -2 -17  -3    0.48    3.41
  -2 -17  -3    0.13    0.51
   2  17  -3   -0.32    0.51
  -2  17   3    1.68    0.86
  -2  17   3    0.45    0.46
   2 -17  -3   -0.09    0.49
   2  17   3   -0.75    0.47
   2 -17  -3   -0.97    0.48
  -2 -17   3    1.09    3.87
  -2  17  -3    0.23    0.50
   2 -17  -3    0.01    2.83
   2  17   3   -0.45    0.47
  -2 -17   3    0.51    0.65
  -3 -17  -3    2.75    0.99
   3  17  -3    4.38    0.83
  -3  17   3    1.80    0.84
  -3  17   3    3.44    1.06
   3 -17   3    4.41    1.09
  -3 -17  -3   -1.45    2.84
   3  17  -3    2.20    3.44
   3  17  -3    1.18    2.71
   3 -17   3    0.45    4.34
   3  17  -3    3.08    1.17
   3 -17  -3    3.92    1.07
   3 -17  -3    4.20    0.97
   3 -17  -3    2.23    3.83
  -3 -17   3    3.43    1.03
  -3 -17   3   -1.67    3.93
  -3  17  -3    2.93    0.91
   3  17   3    5.67    1.01
   3  17   3    4.77    1.10
  -4 -17  -3   -0.35    2.03
   4 -17   3    2.16    4.17
  -4  17   3    5.73    1.35
  -4 -17  -3   -1.84    3.97
   4 -17  -3    5.93    1.34
   4 -17  -3    0.88    5.16
  -4 -17   3    0.17    4.50
  -5  17   3    2.44    0.89
   0 -18  -3    0.66    1.53
   0 -18  -3    1.94    0.94
   0  18   3    1.54    0.70
   0  18   3    2.40    1.11
   0  18   3    0.88    0.70
   0  18  -3    1.44    0.75
   0  18  -3    1.25    0.65
   0 -18  -3    2.07    3.62
   0 -18   3   -2.45    4.32
   0 -18   3    1.91    0.85
   1 -18   3   -0.37    0.47
   1  18  -3   -0.22    0.46
   1 -18   3   -0.49    3.74
  -1 -18  -3   -0.64    0.70
  -1  18   3   -0.12    0.43
   1 -18  -3    0.26    4.48
   1  18   3   -0.41    0.45
  -1  18  -3    0.50    0.52
   1  18   3    0.52    0.61
   1 -18  -3    0.30    0.57
  -2  18   3    5.74    1.38
  -2 -18  -3    3.35    4.28
   2 -18   3    2.17    4.60
   2  18  -3    5.97    1.37
  -2 -18  -3    6.02    1.37
   2  18  -3    6.04    1.19
   2 -18   3    5.54    1.19
  -2  18   3    3.27    1.04
   2  18   3    4.73    1.09
  -2  18  -3    3.28    0.84
   2 -18  -3    5.96    1.16
   2  18   3    4.12    0.94
  -2 -18   3    1.68    4.84
   2 -18  -3    5.18    1.08
   2 -18  -3    2.96    3.56
  -2  18  -3    4.42    1.15
  -2 -18   3    3.90    1.12
  -3 -18  -3    0.40    1.87
   3  18  -3    1.09    0.76
   3  18  -3    1.14    0.78
   3 -18   3    1.42    0.91
   3 -18   3    0.63    5.09
  -3 -18  -3    1.27    6.74
  -3  18   3    1.36    0.76
   3  18  -3    3.29    3.53
   3 -18  -3    1.59    0.70
  -3 -18   3   -6.03    4.27
   3 -18  -3    0.27    5.31
   3  18   3    0.99    0.83
   4 -18  -3    1.40    0.88
   4 -18  -3   -0.44    6.75
   0  19   3   -0.36    0.66
   0 -19   3    5.92    5.24
   0 -19  -3   -0.57    3.51
   0  19  -3   -0.04    0.63
   0 -19  -3    1.09    1.60
   0 -19   3   -0.11    0.45
   0 -19  -3   -0.32    0.65
   0  19   3    0.01    0.70
   0  19  -3   -1.10    0.60
   1 -19   3    1.91    0.95
  -1 -19  -3   -0.30    1.43
   1 -19   3    0.24    4.73
   1  19  -3    0.55    0.68
   1  19  -3    3.25    0.85
  -1  19   3    0.22    0.72
  -1  19   3    1.41    0.92
  -1 -19  -3    0.55    4.74
  -1 -19  -3    1.59    0.81
   1 -19  -3    1.24    4.17
  -1 -19   3    2.69    1.11
   1  19   3    0.21    0.79
  -1  19  -3    0.33    0.64
  -1  19  -3    1.11    0.67
   1  19   3    1.35    0.63
   1 -19  -3    2.01    0.85
  -1 -19   3    2.08    4.49
   2  19  -3    2.59    0.92
   2 -19   3    1.47    0.80
   2 -19   3   -2.80    3.13
   2  19  -3    2.99    0.93
  -2  19  -3    1.47    0.72
   2 -19  -3    1.09    0.86
   2 -19  -3   -0.96    4.41
   2  19   3    0.50    0.76
   3  19  -3    0.33    3.71
   3 -19   3    1.29    5.22
   3 -19  -3   -2.25    4.73
   4 -19   3    2.34    7.47
   0  20   3   -0.47    0.42
   0 -20   3    0.89    0.76
   0  20  -3    0.84    0.68
   0  20  -3   -0.48    0.63
   0 -20  -3    0.61    0.77
   1  20  -3   -0.43    0.79
   1 -20   3   -0.16    0.66
  -1  20   3    1.39    0.75
   1  20  -3    0.19    0.68
   1 -20  -3    0.55    0.63
   1  20   3   -0.30    0.57
  -1  20  -3    0.13    0.68
   2  20  -3    0.82    0.73
   2 -20  -3    2.48    8.46
   2 -20  -3    1.59    1.16
   2  20   3    2.11    0.89
   3  20  -3   -1.03    5.77
   0  21  -3   -0.04    0.61
  -1  21  -3    0.04    0.62
   2 -21   3    2.76    1.41
   0   0  -4  152.72    2.70
   0   0  -4  147.32    2.61
   0   0  -4  146.24    2.63
   0   0   4  148.56    2.63
   0   0   4  145.02    2.63
   0   0   4  146.73    2.68
  -1   0   4  108.27    9.87
   1   0  -4  105.12   10.40
  -2   0  -4    0.19    0.16
  -2   0   4    0.16    0.15
   2   0  -4    0.08    0.22
  -2   0  -4    0.43    0.21
   2   0   4    0.54    0.26
  -2   0   4    0.28    0.16
   2   0   4    0.24    0.21
   2   0  -4    0.26    0.16
  -2   0   4    0.53    0.20
  -2   0   4    0.24    0.25
   2   0   4    0.21    0.22
  -2   0   4   -0.02    0.15
  -2   0  -4   -0.04    2.39
   2   0  -4    0.10    0.26
   2   0   4    0.23    0.16
  -2   0  -4    1.77    1.24
   2   0  -4    0.02    3.28
  -2   0  -4   -0.04    0.18
   2   0  -4    1.24    0.69
  -2   0  -4    0.16    0.14
  -2   0   4    1.69    1.13
  -2   0  -4    0.30    0.18
  -2   0   4   -0.35    2.77
   2   0  -4    0.33    0.21
   3   0  -4  173.44    4.53
   3   0   4  168.21    4.21
   3   0   4  174.87    4.03
   3   0   4  179.81    4.18
  -3   0   4  173.16    3.94
  -3   0   4  170.45    4.33
   3   0  -4  171.72    3.16
  -3   0   4  174.44    3.81
   3   0  -4  174.67    4.27
   3   0   4  171.14    3.27
  -3   0   4  173.65    3.14
  -3   0  -4  175.78    3.37
  -3   0  -4  171.01    3.70
  -3   0   4  170.33    3.20
  -3   0  -4  167.43    3.42
  -4   0   4   12.32    0.97
   4   0   4   11.01    0.68
  -4   0   4   14.13    1.88
   4   0  -4   12.06    1.28
   4   0  -4   10.45    1.11
   4   0   4   11.27    1.09
  -4   0  -4   12.29    0.75
  -4   0   4   11.15    0.69
   4   0   4    9.99    1.03
   4   0  -4   11.56    0.66
  -4   0   4   11.75    0.68
  -4   0  -4   11.05    3.21
  -4   0  -4   10.97    0.74
  -4   0   4   11.84    0.65
   4   0   4   11.80    1.13
  -4   0  -4   11.48    0.76
   5   0   4   32.14    2.08
   5   0  -4   31.72    2.13
   5   0   4   32.39    2.02
  -5   0   4   32.80    1.67
   5   0   4   32.11    2.12
  -5   0  -4   31.39    1.33
  -5   0  -4   31.80    1.27
   5   0  -4   34.13    2.37
  -5   0   4   31.69    0.96
  -5   0   4   32.07    1.13
  -5   0  -4   20.47    4.36
  -5   0  -4   26.18    2.89
  -5   0   4   31.93    0.99
  -5   0  -4   30.88    1.25
  -6   0   4    0.57    0.40
   6   0  -4    0.35    0.57
  -6   0  -4    1.65    1.57
   6   0   4   -0.43    0.47
   6   0   4    0.50    0.43
   6   0   4    0.87    0.52
   6   0  -4   -0.84    0.57
  -6   0  -4    0.36    0.96
  -6   0  -4    0.48    0.21
  -6   0  -4    0.41    0.24
   7   0  -4    2.42    1.00
   7   0   4    1.06    0.81
   7   0  -4    0.77    0.63
   7   0  -4   -1.23    4.06
   7   0   4    1.47    0.74
   8   0  -4    0.60    4.42
   8   0   4   -0.28    1.10
   0  -1   4   37.69    1.05
   0  -1  -4   36.13    1.11
   0   1   4   37.52    1.15
   0  -1  -4   35.85    1.09
   0   1   4   36.54    1.10
   0   1  -4   36.80    0.89
   0   1  -4   36.42    1.08
   0  -1   4   38.30    1.10
   0  -1   4   36.64    1.11
   0   1  -4   39.06    1.11
   0  -1   4   37.24    0.88
   0  -1  -4   36.18    1.11
   0   1   4   35.67    0.91
  -1   1   4  117.47    2.55
   1  -1   4  121.23    1.89
   1   1  -4  115.34    2.58
   1  -1   4  118.60    2.37
  -1   1   4  114.05    2.31
  -1  -1  -4  115.59    2.10
   1  -1   4  113.82    2.31
  -1  -1  -4  116.98    2.29
   1   1  -4  111.73    2.29
  -1   1   4  121.03    2.67
  -1   1   4  115.67    2.21
  -1  -1  -4  114.28    2.42
   1   1  -4  117.13    2.15
   1  -1   4  115.19    2.36
  -1  -1  -4  103.04    8.93
   1  -1   4  116.80    1.93
  -1   1  -4  115.96    2.29
   1  -1  -4  115.06    2.18
   1   1   4  115.66    2.11
   1   1   4  121.31    2.54
   1   1   4  116.21    2.27
  -1  -1   4  117.47    2.56
   1   1   4  116.56    2.12
  -1  -1   4  114.49    2.34
  -1   1  -4  116.21    2.44
  -1  -1   4  113.67    2.40
  -1   1  -4  117.89    2.30
  -1  -1   4  117.48    2.16
  -1   1  -4  120.09    1.80
   1  -1  -4  117.97    2.36
   1  -1  -4  115.97    2.49
  -2  -1  -4   61.54    1.66
  -2  -1  -4   60.00    1.54
  -2   1   4   59.83    1.67
  -2  -1  -4   60.97    1.90
   2  -1   4   60.42    1.64
  -2   1   4   62.82    2.16
   2  -1   4   60.26    1.94
  -2   1   4   62.72    1.43
   2   1  -4   64.29    2.18
   2   1  -4   60.38    1.62
   2   1  -4   60.55    1.87
  -2   1   4   60.67    1.87
   2  -1   4   60.01    1.92
  -2  -1  -4   60.38    1.19
  -2  -1  -4   61.39    1.96
  -2   1   4   59.54    1.60
   2  -1   4   62.61    1.73
   2   1   4   62.52    1.80
  -2  -1   4   60.23    1.79
  -2   1  -4   60.17    1.56
   2  -1  -4   60.57    2.01
  -2   1  -4   59.36    1.80
  -2   1  -4   60.84    1.69
   2  -1  -4   60.90    1.78
  -2  -1   4   57.71    2.04
   2   1   4   60.86    1.52
  -2   1  -4   60.63    1.57
   2   1   4   60.89    2.03
   2   1   4   59.02    1.14
  -2   1  -4   57.13    1.95
  -2  -1   4   58.78    1.63
  -2  -1   4   60.87    1.87
   2  -1  -4   57.61    1.37
  -2  -1   4   60.67    1.36
   3  -1   4    2.65    0.58
  -3  -1  -4    1.95    0.34
  -3   1   4    2.08    0.45
  -3   1   4    2.31    0.27
   3   1  -4    2.27    0.38
   3   1  -4    1.51    0.52
   3   1  -4    2.22    0.57
   3  -1   4    2.30    0.39
  -3  -1  -4    2.67    0.50
   3   1  -4   -0.82    3.78
  -3  -1  -4    1.50    0.45
  -3   1   4    1.95    0.46
  -3  -1  -4    0.01    3.35
   3  -1   4    2.44    0.57
  -3   1   4    2.64    0.39
   3  -1   4    1.61    0.40
  -3  -1   4    2.46    0.49
  -3  -1   4    2.19    0.28
  -3  -1   4   13.14    6.89
  -3   1  -4    2.50    0.52
   3  -1  -4    1.58    0.36
   3  -1  -4   -0.34    3.64
  -3   1  -4    2.97    0.54
  -3   1  -4    4.35    3.72
   3  -1  -4    3.16    0.71
   3   1   4    1.95    0.54
   3   1   4    2.16    0.50
   3   1   4    2.25    0.50
  -3   1  -4    3.05    0.47
   3  -1  -4    3.78    0.72
   3   1   4    2.48    0.34
  -3  -1   4    2.65    0.43
  -3   1  -4    3.19    0.37
  -3  -1   4    2.11    0.47
   3  -1  -4    2.62    0.28
  -3  -1   4    1.85    0.43
  -4  -1  -4    6.73    1.43
  -4   1   4    5.70    1.24
  -4  -1  -4    3.83    2.20
  -4  -1  -4    6.95    0.52
  -4   1   4    6.28    0.53
   4  -1   4    7.11    0.63
   4   1  -4    7.16    1.08
  -4   1   4    7.72    0.57
   4  -1   4    8.87    1.24
   4  -1   4    8.35    0.97
   4  -1   4    6.75    1.03
  -4   1   4    7.29    0.45
  -4   1   4    8.57    0.83
  -4  -1  -4    7.73    0.68
   4   1  -4    7.63    0.63
   4   1  -4    5.85    1.08
  -4   1  -4    8.87    2.83
  -4   1  -4    6.89    0.53
  -4  -1   4    7.96    0.44
   4  -1  -4    8.34    1.29
  -4   1  -4    7.35    0.64
   4   1   4    7.08    0.51
  -4  -1   4    6.61    1.59
   4   1   4    7.71    1.07
  -4  -1   4    7.58    0.77
   4   1   4    6.91    1.02
   4  -1  -4    7.29    1.15
  -4   1  -4    7.49    0.56
   4   1   4    7.43    1.27
  -4  -1   4    6.80    0.36
  -4  -1   4    7.36    0.62
   5  -1   4   23.59    1.76
  -5  -1  -4   22.45    1.20
  -5  -1  -4   24.08    0.95
  -5   1   4   23.72    1.06
  -5  -1  -4   17.41    4.52
   5   1  -4   24.22    1.97
   5   1  -4   22.15    1.79
  -5  -1  -4   20.15    2.62
  -5   1   4   23.86    1.41
   5  -1   4   24.51    1.83
  -5  -1  -4   21.82    1.22
   5  -1   4   28.10    1.96
  -5   1   4   23.87    1.03
  -5  -1   4   22.67    1.40
   5  -1  -4   23.70    1.87
  -5   1  -4   17.77    3.92
   5   1   4   23.96    1.85
  -5   1  -4   22.72    0.94
  -5  -1   4   19.99    2.52
   5  -1  -4   22.20    1.91
   5   1   4   23.97    1.82
  -5  -1   4   24.34    1.12
  -5   1  -4   22.23    1.15
   5   1   4   25.05    1.78
  -5   1  -4   22.88    0.96
   6   1  -4   11.50    1.39
   6  -1   4   10.40    1.61
  -6  -1  -4   11.57    0.84
   6  -1   4    8.75    1.39
  -6   1   4   11.37    1.04
  -6  -1  -4    6.92    2.15
   6   1  -4    7.39    1.48
  -6   1  -4   11.37    0.78
  -6  -1   4   10.91    1.05
  -6   1  -4    6.08    2.56
   6  -1  -4   12.67    1.54
  -6   1  -4    8.84    2.31
   6  -1  -4   10.85    1.78
   6   1   4    9.65    1.57
  -6  -1   4   10.54    0.72
   7   1  -4    0.95    0.71
   7  -1   4    3.65    1.18
   7  -1   4    3.45    0.95
   7   1  -4    1.12    4.11
   7  -1  -4    2.79    0.90
   7  -1  -4   -1.75    2.98
   7   1   4    3.72    1.09
   7   1   4    2.58    0.88
   7  -1  -4    4.97    1.40
   8  -1   4    0.91    0.87
   8  -1   4    0.03    0.95
   8   1  -4    1.84    5.87
   8  -1  -4   -2.67    5.85
   0  -2  -4    2.01    1.72
   0  -2  -4    3.35    2.50
   0   2  -4    1.00    0.26
   0   2  -4    1.01    0.19
   0   2  -4    1.10    0.25
   0  -2   4    1.02    0.26
   0   2  -4    2.74    1.86
   0   2   4    0.97    0.20
   0   2   4    1.42    0.31
   0  -2   4    2.18    2.04
   0  -2  -4    0.12    2.16
   0  -2  -4    1.12    0.20
   0   2   4    1.86    1.57
   0  -2   4    1.12    0.17
   0   2   4    4.51    2.94
   0  -2  -4    1.26    0.31
   0  -2  -4    1.21    0.29
   0   2  -4    3.08    2.17
   0  -2   4    1.62    0.31
   0   2   4    2.83    2.49
   0   2   4    1.05    0.28
  -1   2   4  300.16    5.04
   1  -2   4  310.81    4.89
  -1  -2  -4  306.39    4.88
   1   2  -4  306.36    4.68
  -1  -2  -4  320.71    4.90
   1  -2   4  318.70    4.91
   1  -2   4  308.13    5.04
  -1   2   4  308.47    5.28
   1   2  -4  310.19    5.06
  -1  -2  -4  307.70    5.14
   1   2  -4  310.04    5.24
  -1   2  -4  309.62    4.17
   1  -2  -4  307.05    4.75
   1   2   4  315.08    4.87
  -1  -2   4  314.28    5.14
  -1   2  -4  312.47    4.85
  -1   2  -4  307.41    5.12
  -1   2  -4  305.01    5.08
   1   2   4  310.15    4.84
   1  -2  -4  308.99    5.25
  -1  -2   4  310.69    4.69
   1  -2  -4  322.81    5.23
  -1  -2   4  313.97    5.11
   1   2   4  313.38    5.23
  -2   2   4   28.75    1.16
   2  -2   4   28.98    1.09
  -2   2   4   30.01    1.32
  -2   2   4   30.63    1.04
   2   2  -4   30.40    0.85
  -2   2   4   27.92    1.31
   2  -2   4   31.01    1.04
   2  -2   4   31.68    1.41
   2  -2   4   29.26    0.70
   2  -2   4   31.13    1.29
  -2  -2  -4   30.08    1.01
  -2  -2  -4   28.20    1.20
   2   2  -4   28.07    1.18
  -2  -2  -4   28.67    1.36
  -2  -2  -4   30.42    0.96
   2   2  -4   28.98    1.16
   2  -2   4   31.15    1.19
  -2   2   4   30.30    0.88
   2   2  -4   29.16    1.46
  -2  -2  -4   31.48    1.16
   2  -2  -4   29.88    0.86
  -2   2  -4   29.75    1.22
   2   2   4   29.65    1.43
  -2   2  -4   29.88    0.99
   2   2   4   28.39    0.90
  -2   2  -4   30.53    1.18
  -2  -2   4   29.31    1.33
  -2  -2   4   27.60    1.55
  -2  -2   4   30.11    1.23
   2   2   4   31.64    1.28
   2  -2  -4   30.66    1.27
  -2  -2   4   29.60    0.82
   2  -2  -4   31.79    1.47
  -2   2  -4   29.08    1.01
  -2  -2   4   29.28    1.18
   2   2   4   28.48    0.97
  -2   2  -4   27.64    1.38
  -3   2   4   15.13    1.02
  -3   2   4   16.00    0.89
  -3   2   4   16.49    0.58
   3  -2   4   18.28    1.12
  -3  -2  -4   15.67    0.64
   3  -2   4   17.32    1.22
   3   2  -4   16.54    1.12
  -3  -2  -4   17.11    1.01
  -3  -2  -4   16.97    1.14
  -3  -2  -4   17.51    1.02
   3   2  -4   13.73    1.19
  -3   2   4   15.70    0.92
  -3  -2  -4   16.82    0.85
   3   2  -4   16.69    0.92
   3  -2   4   18.52    0.96
   3  -2   4   16.98    1.15
   3  -2  -4   18.79    1.38
  -3  -2   4   17.13    0.50
   3  -2  -4   16.67    0.95
   3   2   4   16.00    0.71
  -3   2  -4   17.56    1.05
  -3   2  -4   16.29    0.73
   3   2   4   18.72    1.31
  -3   2  -4   16.50    0.95
   3   2   4   17.78    1.19
   3  -2  -4   16.75    1.26
  -3  -2   4   17.12    1.02
  -3  -2   4   16.57    0.95
  -3   2  -4   16.60    0.99
   4  -2   4   15.19    1.32
   4  -2   4   14.45    1.25
  -4   2   4   12.86    2.04
  -4  -2  -4   16.51    0.81
  -4   2   4   16.51    1.11
  -4  -2  -4   15.05    4.31
  -4  -2  -4   17.80    2.46
  -4   2   4   17.97    1.15
   4   2  -4   15.96    0.96
  -4  -2  -4   16.39    0.54
  -4   2   4   16.51    1.13
  -4  -2  -4   18.44    1.12
  -4   2   4   15.85    0.92
   4   2  -4   16.80    1.50
   4  -2   4   17.39    1.30
   4   2   4   16.54    1.25
  -4  -2   4   12.30    2.16
   4  -2  -4   15.89    1.44
   4   2   4   16.46    0.69
   4  -2  -4   16.39    0.98
   4  -2  -4   16.99    1.51
  -4  -2   4   16.45    1.01
  -4   2  -4   16.16    0.73
   4   2   4   16.40    1.35
  -4   2  -4   16.99    0.80
  -4  -2   4   16.03    1.09
   4   2   4   17.83    1.47
  -4   2  -4   18.07    1.08
  -4  -2   4   16.49    2.33
   5  -2   4    9.71    1.17
   5  -2   4    8.66    1.31
  -5   2   4   11.42    0.98
  -5  -2  -4    6.07    1.96
  -5  -2  -4   10.48    0.45
  -5   2   4    9.63    0.81
   5  -2   4    9.63    1.39
   5   2  -4   12.41    1.75
  -5  -2  -4   10.60    0.88
  -5  -2  -4    4.27    2.74
  -5   2   4   11.26    0.79
   5   2  -4    9.17    1.32
   5  -2  -4   11.28    1.37
  -5   2  -4   10.26    0.47
   5   2   4   12.41    1.39
  -5   2  -4   11.37    0.89
   5   2   4    8.93    1.38
  -5  -2   4    6.50    1.84
  -5  -2   4    9.04    0.93
  -5  -2   4   10.69    0.86
   5  -2  -4    8.96    1.42
  -5   2  -4    9.83    0.46
  -6  -2  -4    2.24    1.97
  -6   2   4    7.01    0.93
   6  -2   4    7.89    1.33
   6   2  -4    5.37    1.27
  -6   2   4    6.91    0.61
   6   2  -4    5.37    1.23
   6  -2   4    7.30    1.28
  -6  -2  -4    5.64    0.71
   6   2  -4    2.97    3.16
   6  -2   4    8.31    1.42
   6  -2  -4    9.12    1.67
   6  -2  -4    6.39    1.32
  -6   2  -4    6.49    0.74
  -6  -2   4    6.21    0.68
  -6   2  -4    2.39    1.86
   6   2   4    6.67    1.40
  -6  -2   4    6.69    0.95
   6   2   4    5.73    1.25
   7   2  -4    5.07    1.70
   7   2  -4    6.03    1.34
   7   2  -4    2.12    3.97
   7  -2   4    4.27    1.26
   7  -2   4    5.25    1.24
   7   2   4    4.55    1.22
   7  -2  -4    4.77    1.38
   7   2   4    5.33    1.25
   8   2  -4    1.19    5.20
   8  -2   4    0.26    0.88
   0  -3   4    7.63    0.54
   0   3  -4    7.56    0.55
   0  -3  -4    7.79    0.62
   0   3   4    4.63    2.99
   0  -3   4    7.61    0.36
   0   3   4    8.17    0.59
   0   3  -4    8.14    0.56
   0  -3  -4    7.53    0.43
   0   3   4    7.30    0.61
   0   3  -4    7.77    0.41
   0  -3   4    7.22    0.56
   0   3   4    7.71    0.46
   1  -3   4   33.97    1.23
   1  -3   4   33.58    1.06
  -1  -3  -4   32.12    1.24
  -1  -3  -4   32.08    1.14
   1   3  -4   32.12    1.25
   1   3  -4   33.33    1.04
  -1  -3  -4   33.05    1.19
   1   3  -4   32.36    1.23
  -1   3   4   31.96    1.31
  -1   3  -4   33.25    0.76
  -1  -3   4   32.90    1.19
  -1   3  -4   33.42    1.25
  -1  -3   4   32.99    1.26
   1  -3  -4   36.42    1.32
   1   3   4   34.67    1.14
   1   3   4   33.23    1.18
   1   3   4   33.49    1.29
   1  -3  -4   34.30    1.34
  -1   3  -4   33.61    1.25
  -1  -3   4   33.63    1.02
  -1   3  -4   33.36    1.10
   2  -3   4   58.45    1.80
  -2  -3  -4   57.56    2.04
  -2   3   4   54.61    1.89
   2   3  -4   56.79    1.26
   2  -3   4   59.33    1.36
  -2   3   4   54.72    2.07
  -2  -3  -4   53.63    1.69
   2  -3   4   57.50    1.49
   2   3  -4   55.04    1.65
   2  -3   4   57.51    1.78
   2   3  -4   55.56    2.08
  -2  -3  -4   56.43    1.52
  -2   3   4   59.35    1.37
  -2  -3  -4   55.04    1.55
  -2   3   4   57.81    1.99
   2   3  -4   55.52    1.79
   2  -3   4   57.16    2.01
  -2  -3   4   58.09    1.99
   2   3   4   58.39    1.49
  -2  -3   4   61.38    2.08
   2   3   4   57.36    1.85
  -2   3  -4   54.17    2.00
  -2  -3   4   56.69    1.24
  -2   3  -4   56.05    1.44
  -2   3  -4   59.39    1.85
  -2   3  -4   57.06    1.52
   2  -3  -4   54.24    2.06
   2   3   4   55.95    2.08
   2   3   4   57.65    1.60
  -2  -3   4   54.29    1.81
   2  -3  -4   55.31    1.27
   2  -3  -4   59.07    1.91
   2  -3  -4   68.52    3.22
  -3  -3  -4    0.11    1.69
   3  -3   4    1.81    0.50
   3   3  -4    0.16    1.97
   3   3  -4    1.44    0.53
  -3  -3  -4    1.98    0.48
  -3  -3  -4    1.89    0.34
   3  -3   4    2.35    0.46
   3   3  -4    1.60    0.43
  -3   3   4    1.70    1.28
   3   3  -4    0.66    3.74
   3  -3   4    1.95    0.47
   3  -3   4    1.58    0.17
  -3  -3  -4    1.82    0.29
   3  -3   4    1.89    0.53
  -3   3   4    2.00    0.39
   3   3  -4    2.19    0.47
  -3   3   4    2.18    0.49
  -3  -3  -4    2.93    2.85
  -3  -3  -4    2.51    0.56
  -3   3  -4    1.33    0.37
   3  -3  -4   -1.64    3.85
   3   3   4    1.84    0.52
   3   3   4    2.08    0.30
   3  -3  -4    1.81    0.57
   3   3   4    2.41    0.54
  -3   3  -4    2.24    0.27
  -3  -3   4    1.34    1.38
  -3  -3   4    1.70    0.42
   3  -3  -4    2.35    0.54
  -3  -3   4    4.10    3.34
  -3   3  -4    2.37    0.47
   3   3   4    0.47    2.50
  -3   3  -4    2.18    0.42
  -3  -3   4    0.39    1.31
  -3  -3   4    1.44    0.39
  -3   3  -4    1.39    2.27
  -4  -3  -4   13.64    4.31
  -4   3   4    7.96    0.70
   4   3  -4    8.74    0.96
  -4   3   4    7.55    0.72
   4   3  -4    7.29    1.17
  -4  -3  -4    7.73    0.80
   4   3  -4    6.81    0.72
  -4   3   4   10.51    2.06
   4   3  -4   12.48    3.20
  -4  -3  -4   13.20    2.58
  -4  -3  -4    8.00    0.54
   4  -3   4    6.47    1.14
  -4   3   4    7.89    0.84
   4  -3   4    9.43    1.01
   4  -3   4    7.51    1.10
  -4  -3  -4    7.31    2.41
  -4  -3  -4    7.43    0.44
   4   3   4    7.69    0.42
  -4   3  -4    7.14    0.42
   4   3   4    9.32    1.09
   4  -3  -4    7.75    0.73
  -4  -3   4    8.62    0.83
   4  -3  -4    7.31    1.17
  -4   3  -4    7.56    0.77
  -4  -3   4    7.86    0.80
  -4   3  -4    6.97    0.41
   4   3   4    8.61    1.03
  -4  -3   4   10.78    2.70
  -5  -3  -4    1.67    1.94
  -5   3   4    0.71    0.30
   5  -3   4    1.36    0.57
   5  -3   4    0.62    0.52
  -5   3   4    1.68    0.49
   5   3  -4    0.21    1.88
   5   3  -4    1.06    0.50
  -5  -3  -4    0.29    0.36
  -5  -3  -4    1.25    1.28
   5  -3   4    0.74    0.42
   5   3  -4    1.05    0.59
  -5  -3   4    0.76    1.15
  -5   3  -4    0.57    0.37
  -5   3  -4    2.80    2.11
   5  -3  -4    0.98    0.53
   5   3   4    1.38    0.59
  -5   3  -4    2.69    1.70
   5  -3  -4   -1.21    2.02
  -5  -3   4    0.77    0.41
  -5  -3   4    1.63    0.50
   5   3   4    0.71    0.51
  -6  -3  -4    0.47    0.35
  -6   3   4    0.10    0.31
   6  -3   4    0.32    0.68
  -6   3   4    0.76    0.43
   6  -3   4    1.17    0.71
   6  -3   4   -0.40    0.39
   6   3  -4    1.30    0.62
  -6  -3  -4    1.23    1.34
   6   3  -4    0.39    0.57
   6   3  -4    1.32    2.83
  -6  -3   4    0.68    0.47
   6   3   4    0.49    0.46
  -6  -3   4    0.43    0.34
  -6   3  -4    0.27    1.68
   6  -3  -4    1.26    3.15
   6  -3  -4    0.27    0.49
   6   3   4    0.53    0.56
  -6   3  -4   -0.29    0.35
   7  -3   4   -0.60    0.45
   7   3  -4   -0.44    0.61
   7   3  -4   -1.00    3.57
   7   3  -4    0.62    0.65
   7  -3   4   -1.10    0.47
   7  -3  -4   -0.46    0.58
   7   3   4    0.99    0.82
   7   3   4   -0.61    0.97
   7  -3  -4   -3.08    2.91
   8   3  -4    3.63    8.10
   8   3  -4    0.94    0.98
   8  -3   4    0.98    1.05
   0  -4  -4   95.64    2.47
   0   4  -4  100.50    2.32
   0  -4   4  101.47    2.30
   0  -4   4   94.70    2.34
   0   4   4   95.27    2.35
   0   4  -4   97.59    1.91
   0   4  -4   95.05    2.31
   0  -4  -4  100.72    1.98
   0   4   4   95.51    2.00
   0   4   4   96.94    2.49
   1   4  -4   26.33    1.15
   1  -4   4   25.03    1.11
  -1  -4  -4   25.63    1.13
   1   4  -4   24.12    1.13
   1  -4   4   24.00    1.01
  -1   4   4   23.26    1.20
   1  -4   4   23.54    1.05
   1  -4   4   24.39    1.02
   1   4  -4   25.25    0.96
  -1  -4  -4   23.52    1.09
  -1   4  -4   24.78    1.14
   1  -4  -4   24.39    1.19
   1   4   4   24.22    1.15
  -1  -4   4   25.61    1.18
   1   4   4   21.72    1.05
   1   4   4   25.27    1.03
   1  -4  -4   24.18    1.14
  -1  -4   4   25.79    0.94
  -1  -4   4   26.07    1.05
  -1   4  -4   25.09    1.11
  -1   4  -4   25.65    1.00
   2   4  -4   16.97    0.67
   2   4  -4   16.73    0.82
  -2  -4  -4   17.41    0.91
  -2   4   4   18.58    1.12
  -2  -4  -4   16.64    0.85
   2   4  -4   16.62    1.14
  -2  -4  -4   15.19    1.04
  -2  -4  -4   18.58    1.09
  -2   4   4   15.33    1.11
   2  -4   4   17.81    0.93
   2  -4   4   16.75    0.78
   2   4  -4   25.01    4.18
   2  -4   4   17.87    1.12
  -2   4   4   17.34    0.54
   2   4  -4   17.10    1.00
   2  -4   4   17.38    1.00
  -2   4   4   16.23    1.03
   2   4   4   16.70    1.01
  -2  -4   4   17.22    1.12
  -2   4  -4   17.00    0.76
  -2   4  -4   18.17    0.83
  -2   4  -4   17.48    1.15
   2   4   4   17.26    0.79
  -2  -4   4   18.45    1.10
  -2  -4   4   17.86    0.66
   2   4   4   17.43    1.17
  -2  -4   4   16.38    1.03
   2  -4  -4   15.97    1.12
   2  -4  -4   18.09    2.07
  -2   4  -4   17.46    1.05
  -2  -4   4   14.98    2.11
   2  -4  -4   14.91    1.01
   2  -4  -4   15.94    0.67
   2   4   4   17.01    0.90
   3   4  -4   11.45    4.17
   3  -4   4    7.51    0.88
   3   4  -4    5.97    4.71
  -3  -4  -4   13.58    5.86
  -3   4   4    7.09    0.52
  -3  -4  -4    7.17    0.77
  -3  -4  -4    7.48    0.60
   3  -4   4    8.41    0.79
   3   4  -4    7.89    0.95
  -3  -4  -4    6.96    0.69
   3   4  -4    7.26    0.71
   3   4  -4    6.27    0.66
   3  -4   4    7.33    0.48
  -3  -4  -4   11.31    3.72
   3  -4   4    8.09    0.74
  -3   4   4    7.32    0.76
  -3   4   4   11.32    2.38
  -3   4   4    8.03    2.51
  -3  -4   4   12.68    4.04
   3  -4  -4    8.18    0.76
   3  -4  -4    5.58    8.41
  -3   4  -4    6.57    0.59
  -3   4  -4    7.01    0.73
  -3   4  -4    7.08    0.45
  -3  -4   4    7.21    0.74
   3   4   4    8.39    4.88
   3   4   4    8.47    1.16
   3   4   4    8.33    0.49
   3  -4  -4    7.31    1.09
  -3   4  -4   13.42    4.44
  -3   4  -4    8.13    0.69
   3   4   4    7.10    0.80
  -4  -4  -4   13.44    4.48
  -4   4   4   13.59    0.98
   4  -4   4   12.32    1.28
  -4  -4  -4   10.87    2.09
  -4  -4  -4   14.82    2.86
   4   4  -4   12.54    1.34
  -4   4   4   13.14    1.06
   4   4  -4   14.30    1.15
  -4  -4  -4   12.99    1.07
   4  -4   4   13.31    1.16
  -4  -4  -4   12.41    0.78
   4   4  -4    7.62    2.89
  -4   4   4    9.23    2.48
   4  -4  -4   11.40    0.94
  -4  -4   4   13.01    1.02
  -4  -4   4   12.63    2.78
  -4  -4   4   12.69    1.04
  -4   4  -4   11.34    3.24
   4  -4  -4   13.28    1.36
  -4   4  -4   13.36    0.43
  -4   4  -4   14.26    1.08
   4   4   4   13.27    1.27
   4   4   4   13.57    1.34
   5   4  -4    5.19    1.18
   5   4  -4    6.07    1.02
   5  -4   4    6.54    1.22
  -5  -4  -4    6.57    2.18
  -5  -4  -4    6.70    0.84
  -5  -4  -4    2.94    3.30
  -5  -4  -4    5.54    2.15
  -5   4   4    5.11    1.91
   5  -4   4    6.51    1.05
  -5  -4  -4    6.62    0.55
  -5  -4  -4    5.56    0.47
  -5   4   4    6.91    0.93
  -5   4   4    6.41    0.75
  -5   4  -4    2.63    2.24
  -5  -4   4    6.13    0.94
  -5  -4   4    6.47    0.97
   5   4   4    5.23    1.10
  -5   4  -4    2.60    2.12
   5  -4  -4    6.81    1.31
   5   4   4    7.72    1.37
  -5   4  -4    6.04    0.89
  -5  -4   4    3.75    1.85
   6  -4   4    4.55    0.90
   6   4  -4    7.42    1.51
   6   4  -4    6.46    1.09
  -6   4   4    4.61    0.74
  -6  -4  -4    1.38    1.82
   6  -4   4    4.66    1.12
  -6  -4  -4    5.01    0.92
  -6   4   4    5.49    0.85
   6  -4  -4    3.93    1.17
  -6   4  -4    0.72    1.95
  -6  -4   4    6.83    1.00
  -6   4  -4    5.89    0.90
   6   4   4    5.63    1.23
  -6  -4   4    2.12    1.55
  -6  -4   4    4.51    0.79
   6   4   4    5.87    1.27
   7  -4   4    1.66    0.76
   7   4  -4    1.91    3.72
   7  -4   4    2.23    0.87
   7   4  -4    4.42    1.00
   7   4  -4    1.58    0.86
   7  -4  -4    6.61    5.05
   7   4   4    2.22    1.00
   7  -4  -4    1.40    0.79
   7   4   4    4.53    1.30
   8   4  -4   -1.46    0.96
   0  -5  -4   67.38    1.63
   0   5  -4   67.23    1.98
   0   5  -4   67.39    1.96
   0  -5  -4   64.14    2.11
   0  -5   4   69.03    2.05
   0   5   4   65.51    2.12
   0  -5   4   68.22    1.92
   0   5   4   67.67    1.66
   0   5  -4   69.36    1.61
   0  -5   4   66.16    2.01
  -1  -5  -4   30.66    1.42
   1   5  -4   32.34    1.34
  -1  -5  -4   33.28    1.42
   1   5  -4   34.39    1.45
   1  -5   4   35.85    1.35
  -1  -5  -4   36.14    1.42
   1   5  -4   36.07    1.24
   1  -5   4   33.50    1.31
  -1   5   4   33.89    1.52
   1  -5   4   34.12    1.30
   1  -5   4   35.33    1.42
  -1   5  -4   36.35    1.48
   1   5   4   35.50    1.45
   1  -5  -4   34.08    1.43
   1   5   4   33.20    1.30
   1   5   4   35.48    1.45
   1  -5  -4   35.36    1.77
  -1   5  -4   31.95    1.24
  -1  -5   4   33.33    1.46
  -1   5  -4   34.57    1.38
  -1  -5   4   35.03    1.28
  -1  -5   4   34.75    1.19
   2   5  -4   18.58    6.52
  -2  -5  -4    5.01    0.64
  -2   5   4    4.88    0.75
   2  -5   4    5.10    0.52
   2  -5   4    4.92    0.46
  -2  -5  -4    4.77    0.46
   2  -5   4    4.29    0.70
   2   5  -4    4.88    0.41
   2  -5   4    4.92    0.57
  -2  -5  -4    5.01    0.74
  -2  -5  -4    4.49    0.52
   2   5  -4    4.36    0.54
   2   5  -4    4.89    0.42
   2  -5   4    5.07    0.50
   2   5  -4    5.87    0.84
  -2   5   4    5.04    0.60
  -2   5  -4    4.36    0.71
  -2   5  -4    4.72    0.70
   2   5   4    4.87    0.48
   2   5   4    6.05    0.75
   2  -5  -4    0.69    4.09
   2   5   4    4.39    0.64
   2   5   4    4.94    0.57
  -2  -5   4    5.40    0.41
   2  -5  -4    4.77    0.41
   2  -5  -4    4.76    0.40
  -2   5  -4    4.70    0.46
  -2   5  -4    4.68    0.43
  -2  -5   4    5.41    0.65
  -2  -5   4    5.36    0.62
   2  -5  -4    4.66    0.70
   2  -5  -4    4.81    0.81
  -3  -5  -4    1.78    0.40
  -3  -5  -4    0.32    1.53
  -3  -5  -4    1.20    0.41
   3  -5   4    0.86    0.25
  -3   5   4    1.07    0.22
   3   5  -4    0.48    1.32
   3  -5   4    0.84    0.28
  -3   5   4    1.25    1.12
   3   5  -4    0.14    1.21
  -3  -5  -4    1.30    0.46
  -3   5   4    0.77    0.36
   3  -5   4    1.41    0.46
  -3  -5  -4    0.26    1.06
   3   5  -4    1.43    0.38
   3  -5   4    1.14    0.41
  -3   5   4    0.33    0.87
   3   5  -4    1.68    0.56
   3   5  -4    1.28    0.15
  -3   5  -4    1.70    1.49
  -3   5  -4    1.30    0.40
  -3   5  -4    1.58    0.35
  -3  -5   4    0.66    1.20
   3  -5  -4    0.97    0.89
   3  -5  -4    1.21    0.36
  -3  -5   4    1.06    0.38
   3   5   4    0.31    0.62
   3  -5  -4    1.35    0.54
   3   5   4    1.33    0.42
   3  -5  -4    1.10    1.76
  -3   5  -4    1.19    0.23
   3   5   4    1.58    0.53
   3   5   4    1.02    0.24
  -4   5   4    9.66    0.69
  -4  -5  -4    6.39    4.49
  -4  -5  -4    8.82    0.76
   4  -5   4    9.16    0.98
   4   5  -4    9.77    1.41
  -4   5   4    9.48    0.93
   4   5  -4    9.60    0.90
  -4  -5  -4   10.04    1.55
  -4   5   4    9.29    1.05
   4  -5   4    9.59    0.54
   4   5  -4   11.51    4.30
  -4   5   4    6.13    2.18
  -4  -5  -4    8.91    2.68
   4  -5   4    8.45    1.25
  -4  -5  -4   10.57    1.04
   4  -5  -4    8.92    1.41
  -4  -5   4    8.38    0.91
  -4  -5   4    9.95    3.00
   4   5   4    6.75    1.07
  -4   5  -4    5.47    2.25
   4   5   4    8.81    1.33
  -4   5  -4    9.50    0.95
  -4  -5   4   10.51    1.00
  -5  -5  -4    3.54    0.54
   5   5  -4    2.03    3.58
   5  -5   4    2.93    1.00
   5   5  -4    2.43    0.67
  -5  -5  -4    2.86    0.72
  -5  -5  -4    0.70    1.33
  -5   5   4    2.28    0.61
  -5  -5  -4    3.20    2.38
  -5  -5  -4    2.31    2.02
   5   5  -4    2.13    0.92
   5  -5   4    2.95    0.75
  -5   5   4    2.43    0.60
   5  -5  -4    4.05    1.25
  -5  -5   4    2.54    0.62
   5   5   4    3.19    0.94
   5  -5  -4    0.06    2.56
  -5  -5   4    1.06    1.94
  -5  -5   4    2.67    0.64
  -5   5  -4    2.12    0.63
   6  -5   4    3.56    1.03
  -6   5   4    3.60    0.72
   6  -5   4    4.76    1.08
  -6   5   4    4.84    0.85
   6   5  -4    2.43    3.13
   6   5  -4    4.53    1.03
  -6  -5  -4    4.77    0.94
  -6  -5  -4    1.36    1.53
   6   5  -4    4.89    1.26
   6  -5  -4   -0.19    3.08
  -6   5  -4    4.00    0.87
  -6  -5   4    1.96    2.07
   6   5   4    3.33    1.07
  -6  -5   4    5.19    0.95
   6   5   4    4.56    1.23
   6  -5  -4    3.32    0.85
  -6  -5   4    4.62    0.87
   7   5  -4   -0.21    3.32
   7  -5   4    1.35    0.83
   7   5  -4    1.32    0.99
   7   5  -4    3.44    0.98
   7  -5   4    0.92    0.82
   7   5   4    1.04    0.86
   7  -5  -4    1.12    0.74
   7   5   4    1.28    0.64
   7  -5  -4   -0.01    3.11
   0   6   4   11.59    4.92
   0   6  -4    5.58    1.90
   0  -6  -4    8.27    3.17
   0   6  -4   13.83    4.54
   0  -6   4   14.12    5.40
   0   6   4    4.04    3.32
   0  -6  -4   10.56    4.30
   0   6   4    9.17    3.43
   1   6  -4   75.96    2.38
   1  -6   4   78.76    2.18
   1  -6   4   78.54    2.30
  -1   6   4   77.53    2.53
   1   6  -4   76.97    2.09
  -1  -6  -4   76.72    2.46
  -1  -6  -4   73.82    2.38
   1   6  -4   75.02    2.23
   1  -6   4   75.46    2.17
  -1  -6  -4   77.59    2.28
   1  -6   4   78.03    2.36
  -1  -6   4   73.16    2.40
   1   6   4   77.73    2.20
  -1   6  -4   76.29    2.15
  -1   6  -4   88.46    5.84
  -1  -6   4   77.46    2.32
  -1   6  -4   79.09    2.27
   1  -6  -4   75.18    2.51
  -1  -6   4   78.33    2.48
   1  -6  -4   77.22    2.34
   1   6   4   78.43    2.44
  -1   6  -4   77.27    2.38
   1  -6  -4   77.46    2.13
  -1  -6   4   78.74    2.07
   1   6   4   79.48    2.35
   2   6  -4    1.27    0.28
  -2  -6  -4    3.12    2.94
   2   6  -4    3.82    1.97
   2   6  -4    3.80    2.37
   2  -6   4    4.68    2.84
  -2   6   4    1.91    2.01
   2   6  -4    1.93    0.52
  -2   6   4    2.15    0.54
   2   6  -4    1.56    0.27
  -2  -6  -4    2.12    0.54
   2  -6   4    2.32    0.56
  -2  -6  -4    2.17    0.35
   2   6  -4    2.91    2.03
  -2   6   4    2.47    2.96
   2  -6   4    1.95    0.43
   2  -6   4    1.75    0.37
   2  -6   4    2.38    0.42
   2   6  -4    4.48    2.94
  -2  -6  -4    3.56    2.37
  -2  -6  -4    1.01    0.32
   2   6   4    2.13    0.50
   2   6   4    1.11    0.45
   2  -6  -4    1.50    1.03
  -2  -6   4    2.66    2.93
   2  -6  -4    2.75    2.13
   2  -6  -4   -1.67    3.65
  -2   6  -4    1.20    0.42
  -2   6  -4    1.38    2.31
  -2   6  -4    1.93    0.35
   2  -6  -4    2.15    0.58
  -2  -6   4    1.97    0.52
  -2   6  -4    1.54    0.34
  -2  -6   4    1.55    1.13
   2  -6  -4    2.08    0.35
   2   6   4    1.91    0.49
   2   6   4    2.20    0.36
   2  -6  -4    2.45    0.54
   2   6   4    2.50    1.97
   3   6  -4   10.69    3.78
  -3  -6  -4    7.07    3.07
   3   6  -4   11.63    1.08
   3  -6   4    9.43    0.72
   3   6  -4   10.09    1.08
  -3   6   4   10.20    2.79
   3  -6   4   10.42    0.85
  -3   6   4   10.53    0.99
   3   6  -4    7.46    2.91
   3   6  -4    9.02    0.68
   3   6  -4    9.87    0.46
  -3  -6  -4   10.25    3.11
  -3  -6  -4    9.28    0.75
  -3  -6  -4    8.95    0.78
  -3  -6  -4    9.98    0.96
   3  -6   4    9.59    0.60
   3  -6   4    8.17    0.98
   3   6   4    9.81    1.07
  -3   6  -4    8.60    0.76
  -3   6  -4   10.46    3.32
   3  -6  -4   10.43    1.16
  -3   6  -4    9.85    0.58
  -3   6  -4   10.39    1.10
   3   6   4    9.31    0.97
   3  -6  -4   10.93    2.34
   3  -6  -4    9.34    0.43
  -3  -6   4   10.58    3.41
   3   6   4   10.00    0.62
   4   6  -4    0.81    0.52
  -4  -6  -4    0.49    1.11
  -4   6   4    1.82    0.54
  -4   6   4    1.57    0.30
  -4  -6  -4    0.58    1.96
   4  -6   4    2.08    0.79
   4   6  -4   -0.10    1.32
   4   6  -4    1.39    0.37
  -4   6   4    0.56    0.90
  -4  -6  -4    1.18    0.41
   4  -6   4    1.40    0.33
  -4   6   4    1.32    0.46
   4  -6   4    1.94    0.53
  -4  -6  -4    1.33    0.51
  -4   6  -4    0.80    1.49
   4  -6  -4   -0.84    1.22
  -4  -6   4    0.92    0.76
   4   6   4    2.07    0.75
  -4  -6   4    1.53    0.56
  -4  -6   4    1.07    1.76
   4   6   4    0.85    0.49
  -4   6  -4    0.78    0.34
   4  -6  -4    1.02    0.60
  -5   6   4    9.43    1.03
   5   6  -4    8.48    1.01
  -5  -6  -4    6.22    2.58
  -5   6   4    8.83    0.73
  -5   6   4    9.86    1.03
  -5  -6  -4    4.96    2.69
   5   6  -4    7.01    1.36
   5  -6   4   10.39    1.11
   5  -6   4   11.09    1.62
  -5  -6  -4    8.31    0.80
  -5  -6  -4   10.05    1.09
   5   6   4   10.53    1.88
   5  -6  -4   11.07    1.67
  -5  -6   4   11.29    1.18
  -5  -6   4    9.06    1.01
   5   6   4   11.23    1.36
  -5   6  -4    9.68    1.03
  -6  -6  -4   -0.65    1.31
  -6  -6  -4    1.99    0.68
   6   6  -4    0.29    0.67
  -6   6   4    0.81    0.52
  -6   6   4    1.37    0.50
   6  -6   4    0.54    0.59
   6   6  -4    0.79    2.94
   6   6  -4    0.55    0.51
  -6  -6  -4    1.16    2.25
   6  -6   4    1.36    0.68
   6  -6  -4    1.04    3.02
  -6  -6   4    1.77    0.71
  -6   6  -4    1.95    0.60
   6  -6  -4    1.77    0.67
   6   6   4    1.50    0.73
   6   6   4    0.80    0.74
  -6  -6   4    0.61    1.98
  -6  -6   4    2.39    0.68
  -6   6  -4    1.21    1.97
   7   6  -4    3.79    1.26
   7   6  -4    3.32    0.98
   7  -6   4    1.90    0.87
   7   6  -4    0.26    4.72
   7  -6   4    1.91    0.82
   7   6   4    3.61    1.18
   7   6   4    4.13    1.20
   7  -6  -4    2.94    1.22
   0  -7  -4  178.34    3.48
   0   7   4  183.81    4.37
   0  -7   4  184.65    4.25
   0   7  -4  182.33    4.04
   0  -7   4  185.88    4.00
   0  -7  -4  188.29    4.17
   0   7  -4  219.53   14.69
   0   7  -4  179.85    4.05
   0   7  -4  176.49    3.35
   0  -7  -4  180.60    4.40
   0  -7  -4  181.83    3.57
   0   7   4  180.81    3.48
   0  -7   4  181.17    4.15
   0   7  -4  184.28    3.52
   1  -7   4    9.43    4.76
  -1   7   4    2.15    0.51
   1   7  -4    2.12    0.19
  -1   7   4   12.58    5.48
   1  -7   4    2.42    0.47
  -1  -7  -4    6.69    3.43
  -1  -7  -4    2.48    0.57
   1   7  -4    2.27    0.44
  -1  -7  -4    2.94    0.54
  -1  -7  -4    2.13    0.56
   1   7  -4    2.83    0.54
  -1  -7  -4    6.26    3.53
  -1   7   4   -1.06    4.25
   1  -7   4    2.87    0.53
   1   7  -4    5.39    2.11
   1  -7   4    3.27    0.59
  -1   7  -4    4.12    3.32
   1  -7  -4    7.48    2.88
  -1   7  -4    2.24    0.43
   1  -7  -4    5.78    3.13
   1  -7  -4    2.20    0.18
  -1   7  -4    1.58    0.42
   1   7   4    2.41    0.53
  -1  -7   4    4.11    1.83
   1   7   4    8.40    3.46
   1  -7  -4    0.82    3.55
  -1  -7   4    2.30    0.49
  -1  -7   4   14.48    5.83
   1   7   4    2.88    0.55
  -1  -7   4    2.46    0.56
   1   7   4    0.40    2.26
   1  -7  -4    1.90    0.41
   1   7   4    2.48    0.49
   1  -7  -4    1.97    0.47
  -1   7  -4    2.18    0.43
   2  -7   4   17.50    0.98
   2   7  -4   22.44    4.07
   2  -7   4   16.75    1.16
   2   7  -4   16.70    0.88
  -2  -7  -4   29.41    5.53
  -2  -7  -4   16.17    1.46
   2   7  -4   17.30    1.23
  -2  -7  -4   24.41    7.60
   2   7  -4   17.17    0.54
  -2  -7  -4   17.45    0.79
   2  -7   4   15.77    1.05
  -2   7   4   17.44    1.26
   2  -7   4   15.78    0.87
   2  -7  -4   16.49    2.70
   2  -7  -4   19.75    5.12
   2   7   4   18.29    1.30
   2  -7  -4   16.59    1.26
  -2  -7   4   29.96    8.18
   2  -7  -4   15.90    0.85
  -2  -7   4   15.04    2.70
   2   7   4   16.68    1.15
  -2   7  -4   16.80    0.92
  -2   7  -4   15.32    1.30
  -2  -7   4   18.22    1.31
   2   7   4   27.40    5.02
  -2   7  -4   25.57    7.29
   2   7   4   16.47    0.96
   3   7  -4   -0.01    0.60
  -3   7   4    0.01    0.34
  -3  -7  -4    0.09    0.19
   3  -7   4   -0.04    0.36
  -3  -7  -4    0.26    0.28
   3  -7   4    0.22    0.18
  -3   7   4    1.02    1.28
   3   7  -4   -0.03    0.13
   3  -7   4    0.42    0.28
   3   7  -4    0.59    0.41
   3   7  -4   -0.37    0.63
   3   7  -4    1.06    1.41
  -3  -7  -4    0.46    1.62
  -3  -7  -4    0.88    0.95
   3   7  -4   -0.03    0.14
   3  -7   4    0.10    0.20
  -3  -7   4    0.13    0.35
   3   7   4    0.12    0.18
   3   7   4    0.92    0.82
  -3   7  -4    0.04    0.13
   3   7   4    0.51    0.41
  -3  -7   4    0.15    0.30
  -3  -7   4    1.08    1.58
   3  -7  -4    1.57    1.30
   3  -7  -4   -0.10    0.30
  -3   7  -4   -0.23    0.20
   3  -7  -4    0.07    0.13
   3  -7  -4    1.73    2.06
   3  -7  -4    0.13    0.15
   3   7   4    0.61    0.40
  -3   7  -4   -0.13    0.22
   4  -7   4    0.20    0.35
  -4  -7  -4   -0.13    1.05
   4   7  -4    0.36    0.37
  -4  -7  -4    0.78    0.45
   4  -7   4    0.38    0.35
   4  -7   4    0.58    0.29
   4   7  -4    0.35    0.28
  -4   7   4    1.97    1.27
  -4   7   4    0.78    0.38
  -4  -7  -4    0.41    1.88
  -4   7   4    0.23    0.39
  -4  -7  -4    0.13    0.35
   4   7   4    0.47    0.41
  -4  -7   4   -0.37    0.40
   4  -7  -4    0.06    0.32
  -4  -7   4    1.39    2.54
  -4   7  -4    1.15    0.50
   4  -7  -4   -0.62    1.63
  -4  -7   4    0.31    0.36
   4   7   4    0.21    0.15
   4   7   4    0.36    0.45
   4   7   4    0.44    0.17
  -5  -7  -4   -0.99    1.12
  -5   7   4   -0.06    0.27
  -5   7   4    0.15    0.38
  -5  -7  -4   -0.25    1.96
   5   7  -4    0.04    0.69
   5   7  -4    0.78    0.34
   5   7  -4   -0.31    1.82
   5  -7   4    0.76    0.58
   5  -7   4    0.25    0.27
   5  -7   4    0.42    0.45
  -5  -7  -4   -0.03    0.33
   5   7   4    0.31    0.47
  -5  -7   4   -0.14    0.51
   5   7   4    0.29    0.37
   5  -7  -4    0.08    1.77
   5  -7  -4    0.40    0.43
  -5   7  -4   -0.08    0.36
  -5  -7   4    0.15    0.37
  -5  -7   4    0.10    0.37
  -5  -7   4    0.28    2.15
  -6   7   4    1.89    0.61
  -6  -7  -4    1.48    0.84
   6   7  -4    0.35    3.57
   6  -7   4    0.49    0.65
  -6   7   4    1.56    0.61
   6   7  -4    2.00    0.72
   6   7  -4    0.36    0.64
   6  -7   4    2.18    0.71
  -6  -7  -4   -1.66    1.90
  -6   7  -4    1.65    0.62
   6   7   4    1.99    0.87
   6  -7  -4    1.08    3.26
  -6  -7   4    2.00    0.69
   6  -7  -4    0.46    0.61
  -6  -7   4    0.76    0.54
  -6  -7   4    1.96    2.33
   6   7   4    0.42    0.68
  -7  -7  -4   -0.69    0.53
   7   7  -4   -3.12    5.31
   7  -7   4    0.36    1.06
   7   7   4    1.46    0.86
   0   8  -4   -0.17    0.15
   0  -8   4   -0.02    0.19
   0   8  -4    0.24    0.17
   0  -8  -4    0.04    0.17
   0  -8  -4   -0.05    0.18
   0   8   4    6.44    4.66
   0   8   4    0.30    0.31
   0  -8  -4    0.09    0.22
   0  -8   4    0.43    3.01
   0  -8  -4    0.73    1.18
   0   8  -4    0.15    0.19
   0  -8  -4    1.94    2.10
   1  -8   4   17.10    1.11
  -1  -8  -4   26.70    5.47
   1   8  -4   15.03    0.99
   1  -8   4   16.59    0.99
  -1  -8  -4   14.80    1.17
   1  -8   4   32.21    8.95
  -1   8   4   15.90    1.21
  -1  -8  -4   31.26    8.11
  -1  -8  -4   15.69    1.07
   1   8  -4   16.97    1.08
  -1   8  -4   14.46    0.97
   1  -8  -4   16.69    1.07
   1  -8  -4   16.90    1.13
  -1   8  -4   16.34    1.17
  -1   8  -4   16.71    1.06
   1   8   4   14.91    1.05
   1  -8  -4   17.32    0.84
   1  -8  -4   19.01    3.87
  -1  -8   4   15.48    1.21
  -1  -8   4   13.10    2.64
   1   8   4   15.02    1.17
   1  -8  -4   26.58    6.87
   2  -8   4    9.83    3.66
  -2  -8  -4    8.09    2.95
  -2  -8  -4    6.75    3.23
   2   8  -4    5.44    0.86
  -2  -8  -4    5.34    0.93
   2   8  -4    5.97    2.30
   2   8  -4    9.48    3.21
   2   8  -4    4.35    0.61
  -2  -8  -4    4.68    0.40
   2   8  -4    8.59    2.51
   2  -8   4    4.95    0.59
   2  -8   4    4.49    0.79
  -2   8   4    5.03    1.04
   2  -8   4    4.49    0.49
  -2   8   4   10.58    3.63
   2  -8  -4    6.63    2.51
   2   8   4    4.87    0.89
  -2  -8   4    5.70    0.95
   2  -8  -4    5.54    0.56
  -2   8  -4    4.01    0.52
   2   8   4    5.38    0.83
   2   8   4    4.74    0.66
   2   8   4   10.67    3.29
   2   8   4    4.11    0.70
   2  -8  -4    3.13    1.27
  -2  -8   4    5.87    2.94
   2  -8  -4    4.29    0.83
  -2  -8   4    4.00    1.46
  -2   8  -4    3.33    0.68
   3   8  -4    5.61    1.98
   3   8  -4    9.46    1.11
   3  -8   4    8.11    0.63
   3  -8   4    7.26    0.78
  -3   8   4    8.94    0.99
   3   8  -4    5.00    1.81
   3  -8   4    8.27    1.21
  -3   8   4    6.54    2.71
   3   8  -4    7.46    0.45
  -3  -8  -4    4.89    2.58
   3   8  -4    8.61    0.57
  -3   8   4    7.44    0.90
   3  -8   4    8.27    0.77
  -3  -8  -4    8.90    1.05
  -3  -8  -4    6.22    3.12
  -3  -8  -4    6.97    0.62
   3   8  -4    6.74    2.86
  -3   8  -4    7.97    0.74
   3   8   4    7.28    1.08
   3   8   4    8.30    0.67
  -3   8  -4    7.42    0.59
   3   8   4    7.44    1.14
   3  -8  -4    5.70    2.39
  -3  -8   4    8.61    1.03
   3  -8  -4    8.13    1.28
   3  -8  -4    8.95    0.57
  -3  -8   4    5.85    2.98
   3   8   4    6.66    2.30
  -3   8  -4    8.52    0.97
   3  -8  -4    8.15    0.55
   4  -8   4    1.63    0.67
   4   8  -4    2.35    0.77
   4   8  -4    2.11    0.43
  -4  -8  -4    1.59    0.46
  -4  -8  -4    2.04    2.15
  -4  -8  -4    2.99    0.81
   4  -8   4    1.71    0.49
  -4   8   4    1.84    0.60
   4   8  -4   -0.62    1.43
  -4   8   4    0.91    0.43
   4  -8   4    2.29    0.53
  -4   8   4    3.18    1.89
  -4   8  -4    2.42    0.70
  -4  -8   4    2.35    2.62
   4   8   4    1.70    0.55
  -4  -8   4    2.05    0.65
   4  -8  -4    0.49    1.19
   4   8   4    1.89    0.68
   4  -8  -4    0.50    2.00
   4   8   4    2.40    0.29
   4  -8  -4    1.75    0.73
  -5  -8  -4    1.42    2.31
   5  -8   4    4.60    0.86
   5   8  -4    4.20    1.10
  -5  -8  -4    5.24    1.08
  -5   8   4    6.24    1.03
   5   8  -4    5.56    0.76
   5  -8   4    4.95    1.14
  -5  -8  -4    4.85    2.43
  -5   8   4    6.27    1.07
   5  -8  -4    1.40    2.18
   5   8   4    4.58    1.10
  -5   8  -4    3.42    0.74
   5  -8  -4    5.01    1.21
  -5  -8   4    6.42    1.09
   5   8   4    4.09    1.13
  -5  -8   4    1.32    2.30
   6  -8   4    5.67    1.29
   6   8  -4    3.54    1.20
  -6   8   4    4.11    0.97
   6  -8   4    4.48    0.97
  -6   8   4    5.36    0.92
  -6  -8  -4    0.06    2.59
  -6  -8  -4    5.88    1.14
  -6  -8   4    4.75    1.04
  -6   8  -4    5.06    0.99
   6   8   4    6.60    1.44
   6   8   4    4.74    1.11
  -6  -8   4    4.26    0.96
  -6  -8   4    2.16    2.46
  -7  -8  -4    1.89    0.73
  -7   8  -4    2.91    1.00
  -7  -8   4    1.58    0.81
   0  -9   4   26.99    8.71
   0  -9  -4   16.76    4.83
   0  -9   4   10.44    0.98
   0   9  -4   10.06    0.66
   0   9   4    9.57    1.01
   0  -9  -4    9.45    0.72
   0   9  -4    9.30    0.91
   0   9  -4   10.60    0.79
   0  -9  -4   11.32    0.79
   0  -9  -4   11.50    1.01
  -1  -9  -4   30.32    1.54
   1  -9   4   32.37    7.06
   1  -9   4   31.50    1.61
  -1  -9  -4   22.49    4.41
  -1  -9  -4   29.51    1.20
   1   9  -4   32.92    1.60
   1  -9   4   31.52    1.42
   1   9  -4   29.76    1.49
  -1   9   4   34.23    1.88
  -1  -9  -4   32.03    1.78
  -1  -9  -4   25.64    4.35
  -1   9  -4   31.53    1.71
   1   9   4   32.07    1.56
   1   9   4   34.52    1.84
   1  -9  -4   31.67    1.58
  -1   9  -4   30.13    1.46
  -1  -9   4   30.45    1.75
   1  -9  -4   21.12    3.79
   1  -9  -4   31.83    0.94
   1  -9  -4   31.12    1.57
  -1  -9   4   29.65    5.44
   1  -9  -4   24.20    4.25
   2  -9   4   11.37    4.30
  -2  -9  -4   13.32    1.24
  -2   9   4   13.00    1.19
   2  -9   4   13.01    1.31
   2  -9   4   13.85    1.01
  -2  -9  -4    8.00    3.20
  -2  -9  -4   12.66    0.63
   2   9  -4   14.79    0.99
   2   9  -4   14.89    2.57
   2   9  -4   15.06    1.24
  -2  -9  -4    7.21    3.35
   2   9   4   15.32    1.04
  -2   9  -4   13.76    0.96
  -2   9  -4   15.46    1.27
   2   9   4   12.35    1.12
   2   9   4   13.81    1.19
  -2  -9   4    7.24    3.66
   2   9   4   14.86    1.24
  -2  -9   4   13.55    1.26
   2   9   4   14.54    1.51
   2  -9  -4   13.33    0.93
   2  -9  -4   13.92    1.23
  -3  -9  -4    5.93    0.54
   3   9  -4    4.99    2.18
  -3   9   4    5.13    0.93
   3  -9   4    6.00    0.59
   3   9  -4    5.53    2.57
   3   9  -4    5.95    0.57
   3  -9   4    5.35    0.60
  -3   9   4    3.94    2.28
  -3  -9  -4    5.09    1.01
  -3  -9  -4    2.67    1.78
   3  -9   4    6.39    1.04
   3   9  -4    5.18    2.10
  -3  -9  -4    3.42    2.28
  -3   9   4    5.33    0.93
   3   9  -4    6.10    1.11
   3   9   4    5.09    0.95
   3  -9  -4    5.12    1.00
  -3  -9   4    5.16    1.02
  -3   9  -4    5.45    0.64
  -3  -9   4    2.68    2.25
   3   9   4    5.43    2.54
  -3   9  -4    5.85    0.95
   3  -9  -4    4.85    0.51
  -3   9  -4    5.77    0.83
   3   9   4    6.02    1.11
   3  -9  -4    5.11    3.88
   3   9   4    4.98    0.60
   3  -9  -4    4.10    2.53
  -4   9   4    2.69    2.25
  -4  -9  -4   -1.41    1.07
  -4   9   4    1.33    0.48
   4  -9   4    0.67    0.38
  -4   9   4    0.31    0.38
   4  -9   4    0.85    0.24
  -4  -9  -4    1.27    0.56
  -4  -9  -4    0.26    1.37
   4   9  -4   -0.55    0.32
   4   9  -4    0.58    1.81
  -4  -9  -4    0.74    0.41
   4  -9   4    1.65    0.58
  -4  -9   4   -1.15    1.87
   4  -9  -4    0.65    0.53
   4   9   4    1.09    0.28
   4  -9  -4   -0.82    1.12
   4  -9  -4    0.81    1.42
   4   9   4    0.58    0.49
  -4  -9   4    0.37    0.52
   4   9   4    1.33    0.57
  -4  -9   4    0.14    0.73
   4   9   4    0.77    0.23
  -4   9  -4    0.43    0.39
   5   9  -4    0.07    0.52
  -5  -9  -4    0.59    1.37
   5  -9   4   -0.17    0.36
  -5   9   4   -0.24    0.34
   5  -9   4   -0.19    0.36
  -5  -9  -4    1.33    2.12
   5   9  -4   -0.75    2.35
  -5   9   4    0.29    0.37
  -5  -9  -4    0.16    0.44
   5  -9  -4   -0.93    0.46
  -5  -9   4    0.60    0.42
  -5  -9   4   -0.12    0.68
  -5  -9   4    1.04    2.74
   5   9   4    0.09    0.43
   5   9   4    0.48    0.50
  -5   9  -4    1.33    0.59
   6   9  -4    2.06    0.94
  -6  -9  -4    0.51    1.93
   6  -9   4    3.84    1.19
  -6   9   4    4.28    0.76
  -6  -9  -4    2.79    0.96
  -6   9   4    6.29    1.16
  -6  -9  -4   -0.39    2.61
   6   9  -4   -0.65    3.62
   6  -9   4    4.70    0.98
   6   9   4    4.42    1.18
  -6  -9   4    1.17    3.25
  -6  -9   4    3.87    0.87
   6  -9  -4    4.83    1.28
  -6   9  -4    5.10    1.02
   6   9   4    3.79    1.43
  -6  -9   4    4.05    0.90
  -7  -9  -4    4.68    1.05
  -7  -9   4    6.17    1.20
  -7   9  -4    5.65    1.19
   0  10  -4    5.40    0.86
   0 -10   4    1.31    1.87
   0  10  -4    4.54    0.46
   0  10   4    6.28    0.99
   0 -10  -4    7.14    0.66
   0  10  -4    6.52    0.66
   0 -10  -4    1.90    2.22
   0 -10   4    5.73    0.93
   0 -10  -4    4.97    0.86
   0 -10  -4    5.03    0.58
  -1 -10  -4   30.03    5.29
  -1 -10  -4   41.35    2.16
   1 -10   4   39.85    1.98
  -1 -10  -4   37.78    5.48
   1  10  -4   42.21    1.88
  -1 -10  -4   40.01    1.43
   1 -10   4   43.67    1.72
  -1  10   4   43.96    2.26
   1 -10   4   43.86    7.14
  -1  10  -4   40.05    2.05
  -1 -10   4   46.01    7.00
  -1  10  -4   39.37    1.70
   1 -10  -4   43.45    1.95
   1 -10  -4   41.06    1.17
   1  10   4   42.62    2.19
   1 -10  -4   41.81    1.90
  -1 -10   4   42.49    2.20
   1 -10  -4   30.35    4.94
   2 -10   4    5.73    0.73
   2 -10   4    7.70    3.60
   2  10  -4    2.88    0.67
  -2 -10  -4    8.44    3.53
  -2 -10  -4    4.52    0.93
  -2 -10  -4    4.80    2.92
   2 -10   4    3.39    0.71
  -2  10   4    5.25    0.96
  -2 -10  -4    4.14    0.34
   2  10  -4    4.27    0.68
  -2 -10   4    4.37    0.92
   2  10   4    4.73    0.91
  -2  10  -4    4.36    0.90
   2  10   4    4.28    0.85
   2 -10  -4    3.87    1.56
   2 -10  -4    4.79    0.90
  -2 -10   4    2.88    1.48
   2  10   4    3.46    0.78
   2 -10  -4    6.25    2.96
  -2 -10   4    7.36    3.78
   2 -10  -4    5.04    0.75
   3 -10   4   -0.07    1.63
  -3  10   4    0.80    0.42
  -3 -10  -4    1.62    2.17
   3  10  -4    1.06    0.32
  -3 -10  -4    1.24    0.26
  -3  10   4    1.62    0.55
   3 -10   4    1.19    0.51
   3  10  -4    1.29    0.57
   3  10  -4    0.73    1.89
   3 -10   4    1.69    0.46
  -3 -10  -4    0.53    0.46
   3  10  -4    2.80    1.81
  -3 -10  -4    4.11    2.46
   3  10  -4    1.55    1.70
   3 -10   4    1.24    0.37
  -3 -10   4    1.45    1.05
  -3  10  -4    0.88    0.46
   3  10   4    1.32    0.64
  -3  10  -4    1.24    0.41
   3  10   4    3.51    2.09
   3 -10  -4    0.75    0.28
   3 -10  -4    0.50    1.90
  -3 -10   4    1.93    2.67
   3 -10  -4    2.23    0.74
  -3 -10   4    0.89    0.62
   3  10   4    1.17    0.53
   3  10   4    1.14    0.39
  -4 -10  -4    6.74    0.63
   4  10  -4    7.31    0.39
   4 -10   4    6.67    0.53
   4  10  -4    5.69    1.25
  -4 -10  -4    8.86    1.38
  -4  10   4    6.61    1.13
  -4  10   4    6.22    1.03
   4 -10   4    7.19    0.81
   4  10   4    7.07    1.23
   4  10   4    7.43    0.63
  -4  10  -4    7.06    1.15
   4  10   4    6.13    1.17
   4  10   4    8.47    0.63
   4 -10  -4    7.84    1.37
  -4 -10   4    6.97    1.23
  -5  10   4    2.74    0.73
   5 -10   4    2.28    0.92
   5  10  -4    2.67    0.99
  -5 -10  -4    1.76    3.54
   5  10  -4    0.94    2.12
  -5 -10  -4    3.51    0.99
   5 -10   4    2.58    0.66
  -5 -10  -4   -0.07    1.73
  -5  10   4    3.00    0.85
   5  10   4    2.80    1.01
  -5  10  -4    3.80    0.98
  -5 -10   4    5.11    3.53
   5 -10  -4    3.33    0.99
  -5 -10   4    2.74    0.80
   5  10   4    2.67    0.95
   6 -10   4    0.07    0.66
  -6 -10  -4    1.17    0.63
  -6 -10  -4   -0.33    2.46
   6  10  -4   -1.11    4.29
   6  10  -4    0.02    0.70
  -6  10   4    0.09    0.46
  -6  10   4   -0.63    0.43
  -6 -10  -4   -1.48    2.00
  -6 -10   4    1.97    0.77
   6 -10  -4    0.69    0.93
  -6  10  -4    0.90    0.66
  -6 -10   4    1.15    0.69
   6  10   4    0.39    0.62
   6  10   4   -0.22    0.53
  -6 -10   4   -2.05    3.05
  -7 -10  -4    2.95    0.95
  -7 -10   4    1.21    0.87
  -7  10  -4   -0.37    0.73
   0 -11   4    1.42    0.53
   0 -11   4    0.77    2.01
   0 -11  -4    1.22    1.20
   0  11   4    0.88    0.41
   0  11  -4    0.81    0.27
   0 -11  -4    0.76    0.37
   0 -11  -4    2.25    1.93
   0  11  -4    1.64    0.54
   0 -11  -4    1.44    0.55
   0  11  -4    1.14    0.39
   0 -11  -4    0.87    0.33
  -1 -11  -4   40.91    5.73
   1  11  -4   51.27    2.21
  -1 -11  -4   51.78    2.54
  -1  11   4   58.20    2.76
   1 -11   4   57.91    8.46
   1  11  -4   49.70    2.18
   1 -11   4   56.32    2.42
   1 -11  -4   54.06    2.25
  -1  11  -4   50.31    2.42
  -1 -11   4   49.71    7.72
  -1  11  -4   48.53    1.96
  -1 -11   4   50.85    2.53
   1  11   4   54.23    2.61
   1 -11  -4   52.60    1.46
   1 -11  -4   53.98    2.32
   2  11  -4    4.45    0.90
  -2  11   4    3.38    0.78
   2  11  -4    4.97    0.77
   2 -11   4    2.51    2.67
  -2 -11  -4    5.42    1.09
  -2 -11  -4    1.94    2.23
   2 -11   4    5.35    0.85
  -2  11   4    5.53    1.00
   2 -11   4    4.00    0.76
   2  11   4    4.93    1.00
  -2 -11   4    4.72    0.99
   2  11   4    4.29    0.87
  -2 -11   4    3.97    3.55
   2 -11  -4    5.03    0.80
   2 -11  -4    2.00    2.11
   2  11   4    3.18    0.74
  -2  11  -4    4.31    0.84
   2 -11  -4    5.52    0.99
   3  11  -4    1.20    1.63
  -3  11   4    1.52    0.60
   3 -11   4    1.11    0.40
  -3  11   4    0.81    0.50
  -3 -11  -4   -0.70    1.72
  -3 -11  -4    2.21    1.52
   3  11  -4    0.15    0.48
   3 -11   4    0.17    2.07
   3 -11   4    1.52    0.43
  -3 -11  -4    1.35    0.66
   3  11  -4    1.68    0.45
   3 -11   4    1.06    0.59
   3  11   4    1.04    0.54
  -3  11  -4    1.56    0.59
   3 -11  -4    1.25    0.38
   3  11   4    1.50    0.52
  -3 -11   4    0.74    0.80
   3 -11  -4    2.00    0.70
  -3 -11   4    1.63    0.67
  -3 -11   4    0.67    2.20
   3  11   4    1.33    0.43
   3 -11  -4   -0.16    1.67
   4  11  -4    0.88    0.37
   4  11  -4    1.04    0.58
  -4 -11  -4    0.47    3.54
   4 -11   4    1.01    0.46
   4  11  -4    1.09    0.42
  -4  11   4    0.94    0.51
   4 -11   4    1.13    0.32
  -4  11   4    2.04    0.70
   4 -11   4    1.00    0.54
  -4 -11  -4    0.22    1.40
  -4 -11  -4    1.42    0.67
   4  11  -4    1.18    2.34
  -4 -11   4    2.10    0.74
  -4 -11   4   -0.84    2.49
  -4  11  -4    1.29    0.56
   4  11   4    1.24    0.58
  -4 -11   4    0.92    0.94
   4  11   4    0.99    0.35
   4  11   4    0.53    0.63
   4 -11  -4    2.16    0.81
   4 -11  -4    0.54    2.38
   5 -11   4    9.45    1.29
  -5  11   4    8.71    1.35
   5  11  -4    8.28    1.64
   5 -11   4    9.59    1.55
  -5  11   4    7.87    1.29
  -5 -11  -4    8.66    1.49
   5  11   4    9.92    1.69
   5  11   4    7.88    1.48
  -5  11  -4    9.46    1.48
   5 -11  -4    9.31    1.69
  -5 -11   4    9.85    1.52
  -6 -11  -4   -0.27    2.38
  -6 -11  -4   -0.17    2.91
  -6  11   4    0.98    0.65
  -6 -11  -4    2.41    0.82
   6  11  -4    1.73    1.15
   6 -11   4    2.37    1.00
  -6 -11   4   -0.61    3.62
  -6  11  -4    1.23    0.66
  -6 -11   4    2.30    0.82
   6  11   4    1.26    0.90
   6 -11  -4    2.22    1.16
  -6 -11   4    2.86    0.84
  -7 -11   4   -1.69    0.71
  -7  11  -4    0.32    0.70
   0 -12  -4   14.13    5.11
   0  12  -4    5.75    0.82
   0  12  -4    5.47    0.93
   0  12   4    5.77    1.05
   0 -12  -4   14.06    4.02
   0 -12  -4    5.80    1.03
   0  12  -4    6.00    0.53
   0 -12   4    6.34    1.11
   0 -12   4   19.91    6.46
   0 -12  -4    7.34    0.74
   0 -12  -4    6.48    0.76
  -1 -12  -4    2.12    0.71
   1 -12   4    1.61    2.77
  -1 -12  -4    1.34    1.79
   1 -12   4    3.39    0.81
  -1 -12  -4    1.35    2.32
   1  12  -4    2.70    0.71
   1  12  -4    2.11    0.55
  -1  12   4    1.04    0.49
   1 -12  -4    2.19    0.38
  -1 -12   4    2.34    0.75
  -1  12  -4    1.56    0.64
   1 -12  -4    4.93    3.07
   1  12   4    0.83    1.78
   1 -12  -4    1.31    1.34
   1 -12  -4    2.04    0.58
   1 -12  -4    1.98    0.66
  -1 -12   4    2.94    3.32
   1  12   4    1.95    0.70
  -2 -12  -4    5.53    2.91
  -2 -12  -4    4.07    0.98
  -2  12   4    3.45    0.90
   2  12  -4    3.17    0.83
   2 -12   4    4.57    0.83
   2  12  -4    3.11    0.72
   2 -12   4    2.16    0.67
  -2 -12  -4    5.90    3.32
   2 -12   4    4.98    3.48
  -2  12   4    3.52    0.83
  -2 -12   4    3.02    2.85
  -2 -12   4    1.34    1.12
   2  12   4    4.12    0.86
   2 -12  -4    2.99    2.53
   2  12   4    3.64    0.91
   2 -12  -4    2.19    1.25
  -2  12  -4    3.77    0.88
   2 -12  -4    4.63    0.87
  -2 -12   4    3.53    0.85
   2 -12  -4    3.66    0.90
   2  12   4    4.43    0.78
   3  12  -4    9.82    0.87
   3 -12   4    6.59    4.11
   3  12  -4    9.69    3.65
  -3  12   4    8.64    1.33
   3 -12   4    9.89    1.19
   3 -12   4   11.36    0.99
   3 -12   4   11.41    0.90
   3  12  -4   14.54    3.88
  -3 -12  -4    7.20    4.07
  -3  12   4   11.39    1.36
  -3 -12  -4   10.42    1.30
   3  12   4    9.54    1.45
   3 -12  -4   10.33    0.90
   3 -12  -4    7.90    3.90
  -3  12  -4   11.38    1.28
  -3 -12   4   12.39    1.44
  -3 -12   4    4.58    3.21
   3  12   4   10.31    0.97
   3 -12  -4    8.61    1.39
   4  12  -4    0.04    1.90
  -4  12   4    4.53    1.01
   4  12  -4    2.01    1.41
  -4 -12  -4    3.69    0.90
  -4 -12  -4    4.25    2.96
   4  12  -4    2.95    1.01
   4 -12   4    4.25    0.68
  -4 -12  -4    1.25    1.72
  -4  12   4    3.58    0.86
   4  12  -4    4.27    0.50
   4 -12   4    3.83    0.60
   4 -12   4    4.68    1.15
   4  12   4    4.76    0.68
   4  12   4    3.94    1.01
   4  12   4    2.03    1.44
  -4 -12   4    3.00    0.93
   4  12   4    3.39    0.95
   4 -12  -4    4.26    3.17
  -4  12  -4    1.82    0.69
   4 -12  -4    3.55    0.99
   4 -12  -4    4.92    0.72
  -5 -12  -4    1.74    3.02
   5  12  -4    5.63    1.40
  -5  12   4    4.17    1.00
  -5 -12  -4    1.41    2.44
   5 -12   4    6.14    1.32
  -5 -12  -4    6.40    1.38
  -5  12   4    5.54    1.13
  -5 -12   4    7.07    4.75
   5  12   4    6.51    1.33
   5 -12  -4    3.11    1.07
  -5 -12   4    5.42    1.19
  -5  12  -4    4.58    1.06
  -6 -12  -4    3.49    1.20
  -6 -12  -4   -1.34    3.09
  -6  12   4    6.95    1.44
  -6 -12   4    5.79    5.29
  -6  12  -4    5.31    1.10
  -6 -12   4    6.86    1.21
  -6 -12   4    4.64    1.13
   0  13  -4   -0.16    0.26
   0 -13  -4    2.69    2.73
   0  13   4   -0.43    0.31
   0 -13  -4    2.13    1.86
   0 -13  -4   -0.18    0.26
   0  13   4    0.94    0.45
   0  13  -4    0.42    0.34
   0 -13  -4    0.22    0.34
   0 -13   4    0.07    0.34
   0 -13   4    4.92    3.51
  -1 -13  -4    4.34    1.01
   1 -13   4    1.41    3.78
   1  13  -4    3.77    0.79
  -1 -13  -4    2.47    0.34
  -1 -13  -4    0.82    1.57
   1  13  -4    2.80    0.75
   1 -13   4    3.96    0.92
  -1 -13  -4    1.57    2.68
  -1  13   4    1.76    0.77
  -1  13   4    2.12    0.69
   1 -13  -4    2.56    0.67
   1  13   4    2.59    0.68
  -1  13  -4    2.59    0.77
   1 -13  -4    0.62    1.18
   1 -13  -4    2.75    0.74
   1 -13  -4    2.28    0.39
   1  13   4    1.67    0.56
   1 -13  -4   -0.18    1.77
  -1 -13   4    1.88    0.63
  -1 -13   4    3.06    3.12
   1  13   4    1.80    0.65
   2 -13   4   10.00    1.04
   2  13  -4    9.74    1.14
  -2  13   4   10.95    1.26
   2 -13   4   10.87    1.10
  -2 -13  -4    8.46    1.39
  -2  13   4   11.80    1.35
   2  13  -4    8.36    0.95
   2 -13   4    4.18    3.81
  -2 -13   4    3.69    3.11
  -2  13  -4    8.31    1.33
   2 -13  -4    5.12    3.18
   2 -13  -4    8.83    1.03
  -2 -13   4    8.76    1.47
   2  13   4    9.34    2.07
   2  13   4    8.99    1.01
   2 -13  -4    9.74    1.17
   2  13   4    8.31    1.31
   3 -13   4    1.70    0.62
   3 -13   4    1.63    0.59
  -3  13   4    1.20    0.68
   3  13  -4    0.91    0.47
   3  13  -4    1.18    0.47
   3 -13   4   -0.50    2.41
  -3 -13  -4    1.26    2.15
   3  13  -4    1.79    2.02
  -3 -13  -4    1.60    0.70
   3  13  -4   -0.55    1.69
  -3 -13  -4    1.71    2.39
   3 -13   4    0.79    0.36
  -3  13   4    0.93    0.63
  -3 -13   4    1.87    0.72
  -3 -13   4    2.18    2.92
   3  13   4    0.88    0.46
  -3  13  -4    1.21    0.56
  -3 -13   4    0.05    1.00
   3 -13  -4    1.60    0.67
   3 -13  -4    5.46    2.93
   3  13   4    1.44    0.51
   3 -13  -4    1.21    0.51
  -4 -13  -4    1.81    3.13
  -4 -13  -4    0.29    2.19
   4 -13   4    1.62    0.53
  -4  13   4    0.91    0.63
  -4  13   4    1.66    0.67
   4 -13   4    1.62    0.52
   4  13  -4    0.89    0.43
  -4 -13  -4    1.36    0.72
   4  13  -4    1.32    1.72
   4  13  -4    0.27    2.53
   4 -13   4    0.47    0.51
   4  13  -4    0.96    0.58
  -4  13  -4    1.08    0.58
   4  13   4    1.37    0.61
   4  13   4    0.98    0.49
   4 -13  -4    2.02    0.85
   4 -13  -4    2.85    2.90
  -4 -13   4    3.24    3.82
   4  13   4    1.46    1.66
  -4 -13   4    0.45    0.54
  -5 -13  -4   13.79    2.28
  -5  13   4    9.78    1.55
  -5  13   4    7.73    1.41
   5  13  -4    9.37    1.64
   5 -13   4   11.19    2.32
   5  13   4   12.09    1.99
  -5 -13   4    9.75    1.63
  -5  13  -4   11.09    1.66
  -6 -13  -4    2.47    4.29
  -6 -13  -4   -0.08    2.29
  -6  13   4    0.70    0.73
  -6  13  -4    1.02    0.75
  -6 -13   4    0.78    0.78
   0 -14   4   18.94    8.01
   0  14   4   33.67    2.12
   0  14  -4   36.28    1.93
   0 -14   4   36.99    2.31
   0 -14  -4   35.78    1.58
   0 -14  -4   36.22    2.29
   0  14   4   35.86    2.47
   0  14  -4   33.08    2.10
   1  14  -4    4.46    0.87
   1  14  -4    4.71    0.92
  -1 -14  -4    2.66    2.60
   1 -14   4    3.45    0.89
  -1 -14  -4    4.28    1.16
   1 -14   4    6.03    3.83
  -1  14   4    3.37    0.93
  -1  14   4    4.43    0.95
   1  14   4    4.59    0.92
   1 -14  -4    4.50    0.96
  -1  14  -4    5.06    0.81
  -1 -14   4    1.61    3.53
   1 -14  -4    5.35    0.53
   1 -14  -4    1.71    2.53
   1  14   4    5.72    1.12
   1 -14  -4    5.91    0.90
  -1 -14   4    3.40    0.90
  -1  14  -4    3.09    0.80
   2  14  -4    0.25    0.51
  -2 -14  -4    0.69    0.53
   2 -14   4    1.65    2.97
  -2  14   4    0.70    0.58
   2  14  -4    0.87    0.47
  -2 -14  -4    0.27    2.22
  -2 -14  -4    2.64    2.40
  -2  14   4    0.60    0.56
   2 -14   4   -0.11    0.33
   2  14   4    0.39    0.41
   2  14   4    0.60    0.47
   2  14   4    0.09    2.65
   2 -14  -4    1.80    2.65
  -2  14  -4   -0.02    0.39
   2  14   4   -0.02    0.35
  -2 -14   4    0.90    0.55
   2 -14  -4    0.08    0.82
   2 -14  -4    0.48    0.48
  -2 -14   4    2.95    4.23
   2 -14  -4    1.12    0.54
   3 -14   4    3.91    0.86
  -3 -14  -4    0.71    1.42
   3 -14   4   -0.56    3.14
   3  14  -4   -0.23    1.90
  -3 -14  -4    0.48    2.70
   3  14  -4    2.59    0.83
   3 -14   4    4.44    0.99
   3 -14   4    2.41    0.58
  -3  14   4    3.90    0.97
   3  14  -4    2.05    2.17
  -3 -14  -4    2.82    0.84
  -3  14   4    2.25    0.77
   3  14  -4    3.78    0.72
   3 -14  -4    1.74    0.72
   3 -14  -4    2.35    3.06
  -3  14  -4    3.31    0.83
   3 -14  -4    2.91    0.67
  -3 -14   4    2.52    3.21
   3  14   4    2.89    0.67
   3  14   4    4.12    0.96
  -3 -14   4    2.64    0.94
  -4  14   4   -0.11    0.49
  -4  14   4   -0.25    0.43
  -4 -14  -4   -0.11    0.61
   4 -14   4    0.69    3.33
   4  14  -4    0.83    3.40
   4  14  -4    1.29    2.14
   4  14  -4    0.39    0.61
  -4 -14  -4    0.83    2.44
   4 -14   4   -0.66    0.52
  -4 -14  -4    0.40    1.80
  -4 -14   4    1.70    3.57
  -4 -14   4   -0.01    0.59
   4  14   4   -0.82    0.44
   4 -14  -4    0.92    0.69
  -4  14  -4   -0.59    0.45
   4  14   4   -0.64    0.40
   4  14   4   -0.75    1.94
   4 -14  -4    0.45    2.88
  -5 -14  -4   -1.02    2.60
  -5 -14  -4    1.69    1.74
   5 -14   4    2.19    0.94
  -5  14   4    4.02    0.98
  -5 -14  -4    2.26    0.92
   5  14  -4    1.82    0.94
  -5  14   4    2.62    1.04
  -5 -14   4   -0.02    3.56
  -5 -14   4    4.45    1.18
  -5  14  -4    2.77    0.87
   5  14   4    2.49    1.18
   5 -14  -4    2.72    0.97
  -6 -14  -4   -4.52    3.80
  -6 -14   4   -7.39    5.61
   0 -15  -4    0.73    1.26
   0 -15  -4    0.76    2.32
   0 -15   4   -0.14    0.32
   0  15   4    0.02    0.36
   0  15   4    0.19    0.39
   0 -15  -4    0.38    0.30
   0 -15  -4    0.87    0.63
   0  15  -4   -0.49    0.23
   0 -15   4    1.36    2.88
   0  15  -4    0.43    0.44
   1  15  -4    1.70    0.66
  -1 -15  -4   -0.72    1.03
   1 -15   4    2.31    0.74
   1  15  -4    1.20    0.60
  -1 -15  -4    2.66    2.77
  -1  15   4    0.99    0.56
  -1 -15  -4    1.26    0.68
  -1  15   4    2.60    0.85
   1 -15   4    0.30    2.85
   1 -15  -4    1.74    1.49
   1  15   4    0.81    0.61
   1  15   4    1.52    0.61
  -1  15  -4    1.66    0.69
  -1  15  -4    1.20    0.49
   1 -15  -4    2.75    0.78
  -1 -15   4    1.79    0.74
   1 -15  -4    1.72    0.56
  -1 -15   4    4.70    3.83
   1  15   4    1.27    0.65
   1 -15  -4    0.87    2.92
   2  15  -4    4.06    1.06
   2 -15   4    5.30    1.07
  -2  15   4    5.28    1.11
  -2  15   4    6.25    1.33
   2  15  -4    5.41    1.01
  -2 -15  -4    0.77    2.51
  -2 -15  -4    5.43    1.25
   2 -15   4    2.36    3.43
   2  15   4    5.63    1.01
   2 -15  -4    4.61    0.93
  -2 -15   4    0.94    3.11
  -2  15  -4    5.18    1.18
   2  15   4    3.72    0.94
  -2 -15   4    4.08    1.11
   2 -15  -4    5.06    0.97
   3 -15   4   -1.89    2.77
   3 -15   4    0.55    0.55
  -3 -15  -4    1.34    0.77
   3  15  -4    2.65    2.24
   3  15  -4    2.17    0.64
  -3  15   4    0.24    0.44
  -3 -15  -4    0.36    1.55
  -3 -15  -4    0.50    3.21
   3  15  -4    3.15    0.97
   3 -15   4    1.94    0.53
   3  15  -4   -0.18    2.43
  -3  15   4    2.26    0.87
   3 -15   4    0.40    0.50
   3 -15  -4    1.59    0.59
  -3 -15   4    2.18    0.83
  -3 -15   4   -1.39    2.76
   3  15   4    1.27    0.62
   3 -15  -4   -3.22    2.58
   3  15   4    2.04    0.63
   3 -15  -4    1.62    0.60
  -3  15  -4    1.53    0.65
  -4 -15  -4    0.70    2.27
  -4 -15  -4   -1.34    2.58
  -4 -15  -4    0.53    0.70
  -4  15   4    1.56    0.71
   4 -15   4   -6.16    4.68
   4  15  -4    0.68    4.38
   4 -15   4    1.13    0.73
  -4  15   4    1.22    0.74
   4 -15  -4    0.63    0.72
  -4 -15   4   -1.15    4.11
  -4  15  -4    1.14    0.65
   4 -15  -4   -3.84    3.22
   4  15   4    1.72    0.88
  -4 -15   4    1.24    0.64
  -5 -15  -4   -0.87    2.43
  -5  15   4    0.40    0.76
   5 -15   4   -0.72    0.52
  -5 -15  -4   -1.13    2.77
   5 -15  -4    0.25    0.81
  -5 -15   4   -1.13    6.34
  -6 -15  -4   -1.52    2.55
  -6 -15   4   -1.48    8.05
   0  16   4    2.36    0.83
   0 -16  -4    2.51    2.95
   0  16  -4    1.39    0.62
   0  16  -4    1.09    0.56
   0 -16   4    1.00    0.58
   0 -16  -4    0.75    0.60
   0 -16   4    0.14    3.37
   0 -16  -4    1.23    0.41
   0  16   4    1.83    0.60
   0 -16  -4    0.22    1.24
   1  16  -4    1.02    0.54
  -1 -16  -4    0.48    0.51
  -1 -16  -4   -0.53    1.08
  -1  16   4    1.36    0.63
   1 -16   4    1.82    3.91
  -1 -16  -4    2.12    3.24
   1 -16   4    1.54    0.73
  -1  16   4    0.51    0.56
   1  16  -4    0.95    0.52
  -1  16  -4    0.80    0.48
   1  16   4    0.93    0.57
   1 -16  -4    1.03    0.66
   1 -16  -4    0.55    0.42
  -1  16  -4    0.38    0.40
   1  16   4    0.46    0.60
  -1 -16   4   -0.88    2.56
   1  16   4    1.05    0.47
  -1 -16   4    0.19    0.45
   1 -16  -4    0.33    1.20
   1 -16  -4   -1.77    2.50
  -2  16   4    0.63    0.49
   2  16  -4    0.45    0.55
  -2 -16  -4   -0.36    0.96
  -2  16   4    1.69    0.81
   2  16  -4    0.97    0.67
   2 -16   4    1.15    0.58
  -2 -16  -4    0.53    3.10
  -2 -16  -4    0.50    0.56
   2 -16   4   -1.90    2.78
   2  16   4    1.38    0.54
   2  16   4    0.64    0.58
  -2 -16   4   -0.71    2.69
  -2  16  -4    0.37    0.54
   2 -16  -4    3.71    3.43
   2 -16  -4    1.75    0.67
   2 -16  -4    0.09    0.51
  -2 -16   4    0.37    0.57
   3  16  -4    3.57    0.95
   3 -16   4    3.59    0.95
   3  16  -4    3.44    3.02
   3  16  -4    3.61    3.33
  -3 -16  -4   -0.36    3.36
  -3 -16  -4    2.44    2.17
   3  16  -4    2.89    0.79
   3 -16   4   -2.87    2.90
  -3  16   4    2.57    0.90
   3  16   4    2.97    1.10
   3 -16  -4    3.41    0.95
   3 -16  -4    0.75    3.44
   3  16   4    3.16    0.65
   3 -16  -4    4.84    0.96
  -3 -16   4   -0.82    3.60
  -4 -16  -4    0.51    3.12
   4 -16   4   -0.82    3.55
  -4 -16  -4   -0.78    1.75
   4  16  -4    0.31    0.66
  -4 -16  -4   -0.19    0.62
  -4  16   4    0.04    0.54
  -4  16   4   -0.26    0.68
   4 -16  -4   -0.59    0.55
   4  16   4   -0.87    0.52
  -4 -16   4   -1.42    4.57
  -4 -16   4    0.91    0.78
  -4  16  -4   -0.42    0.56
  -5 -16  -4   -1.54    2.03
  -5  16   4    1.12    0.73
  -5 -16   4   -1.32    4.82
   0 -17  -4    0.78    0.68
   0  17   4    1.24    0.68
   0  17  -4    1.35    0.59
   0 -17  -4   -1.57    2.60
   0 -17   4    2.92    3.93
   0 -17   4    0.70    0.68
   0  17  -4    0.36    0.52
   0 -17  -4    0.66    1.29
   0  17   4    1.58    0.74
  -1  17   4    8.42    1.44
   1  17  -4    6.12    1.23
  -1  17   4    7.76    1.51
  -1 -17  -4    9.11    1.51
   1  17  -4    7.67    1.29
   1 -17   4    9.45    1.64
  -1 -17  -4    1.18    3.89
   1 -17   4    3.25    3.82
  -1  17  -4    8.47    1.24
  -1 -17   4    8.22    1.52
   1  17   4    7.65    1.30
  -1  17  -4    6.39    1.24
   1 -17  -4    7.11    1.29
   1 -17  -4    7.04    1.08
   1  17   4    8.45    1.34
   1 -17  -4    3.54    4.15
   1  17   4    9.38    1.61
  -2  17   4   -0.43    0.53
  -2 -17  -4    0.91    1.58
  -2  17   4   -0.57    0.68
  -2 -17  -4   -0.80    2.89
   2  17  -4    0.02    0.57
   2 -17   4   -0.25    0.55
   2 -17   4    3.82    4.51
  -2  17  -4    0.15    0.46
   2 -17  -4    0.20    0.49
   2 -17  -4   -0.58    3.27
  -2 -17   4   -2.60    3.12
   2  17   4    0.66    0.58
  -2  17  -4   -0.49    0.31
   2 -17  -4    1.09    0.66
   2  17   4   -0.44    0.76
  -3 -17  -4   -2.29    3.04
  -3  17   4   -0.39    0.52
   3  17  -4   -0.65    3.08
  -3 -17  -4   -0.14    0.59
  -3  17   4    2.33    1.14
   3  17  -4    0.09    0.60
   3  17  -4    0.35    2.72
  -3 -17  -4   -3.48    2.17
   3 -17   4    1.43    4.09
   3  17  -4    0.26    0.99
   3 -17   4   -0.21    0.57
   3 -17  -4   -0.86    3.73
   3  17   4    1.29    0.75
   3 -17  -4    0.55    0.67
   3  17   4   -0.16    0.45
  -3 -17   4   -1.59    3.35
  -3  17  -4   -0.22    0.65
  -3 -17   4    0.20    0.57
   3 -17  -4   -0.02    0.57
  -4 -17  -4   -0.54    1.78
   4 -17   4    2.90    4.38
  -4  17   4   -0.02    0.66
  -4 -17   4    1.67    5.36
   4 -17  -4    1.43    0.78
   4 -17  -4   -1.11    5.29
   0 -18   4    0.05    4.22
   0  18  -4    0.82    0.50
   0 -18   4    1.82    0.95
   0  18   4    0.26    0.46
   0  18   4    1.17    0.81
   0  18   4    1.91    0.81
   0 -18  -4    1.39    0.78
   0 -18  -4   -0.06    1.42
   0 -18  -4   -2.85    3.28
   0  18  -4    0.73    0.68
  -1 -18  -4    0.15    1.63
   1  18  -4    1.21    0.66
   1 -18   4   -5.28    3.46
   1 -18   4    0.26    0.56
  -1  18   4    0.39    0.71
   1  18  -4   -0.10    0.55
  -1  18   4   -0.77    0.64
   1  18   4    0.32    0.52
   1 -18  -4    0.04    0.51
   1 -18  -4   -1.98    3.50
  -1  18  -4    0.16    0.51
   1  18   4   -0.77    0.60
   1 -18  -4    0.30    1.10
   2 -18   4    0.55    0.77
  -2  18   4    2.04    0.94
   2  18  -4    4.18    1.03
   2  18  -4    1.76    0.69
   2 -18   4   -0.11    3.60
  -2 -18  -4    1.94    4.87
  -2 -18  -4    0.18    1.73
  -2 -18  -4    3.22    1.07
  -2  18   4    1.72    1.03
   2  18   4    0.21    0.66
   2  18   4    2.10    0.84
  -2 -18   4    1.47    4.15
   2 -18  -4    1.55    0.79
   2 -18  -4   -2.50    5.72
  -2 -18   4    2.76    0.99
  -2  18  -4    0.68    0.68
  -2  18  -4    2.13    0.71
   2 -18  -4    1.09    0.91
  -3  18   4    2.04    0.94
   3 -18   4    1.21    0.88
   3  18  -4    1.45    3.44
   3  18  -4    1.90    0.92
  -3 -18  -4    0.21    1.67
   3 -18   4    1.53    8.34
  -3 -18   4    3.92    5.85
   3  18   4    1.11    0.70
   3 -18  -4   -4.05    4.20
   3 -18  -4    0.44    0.77
   4 -18   4    4.98    5.75
   4 -18  -4    1.56    7.34
   4 -18  -4   -0.29    0.68
   0 -19   4    1.01    4.55
   0  19   4   -0.03    0.58
   0  19   4    0.02    0.71
   0 -19  -4    0.46    1.46
   0 -19  -4   -1.09    0.50
   0  19  -4   -0.05    0.52
   0  19  -4   -0.78    0.47
   0 -19  -4   -0.59    4.79
   0 -19   4    0.77    0.72
   0  19   4   -0.48    0.62
  -1 -19  -4    1.65    0.88
  -1  19   4    2.18    0.88
   1  19  -4    4.54    0.93
   1  19  -4    2.41    0.82
  -1 -19  -4    0.11    3.29
  -1  19   4    1.98    1.01
   1 -19   4   -1.76    3.86
   1 -19   4    4.38    0.97
  -1 -19  -4   -0.29    1.34
   1 -19  -4    1.66    0.89
  -1 -19   4    4.16    6.00
   1 -19  -4   -0.65    4.21
   1  19   4    2.13    0.79
  -1  19  -4    1.51    0.80
  -1 -19   4    0.59    0.80
  -1  19  -4    1.80    0.73
   2 -19   4   -3.12    3.74
   2  19  -4    1.14    3.40
   2  19  -4    0.81    0.70
   2 -19   4    1.39    0.86
   2  19  -4    1.21    0.79
   2 -19  -4   -4.03    3.68
   2  19   4    1.82    0.84
  -2  19  -4    0.67    0.60
   2 -19  -4   -0.21    0.76
   3  19  -4    4.04    4.67
   3 -19   4   -1.67    5.20
   3 -19  -4    3.91    6.56
   0  20   4    1.48    1.14
   0  20  -4    1.16    0.62
   0 -20   4    2.06    1.41
   0 -20  -4    2.32    1.05
   1  20  -4    3.18    1.03
   1 -20   4    2.02    0.95
   1  20  -4    4.19    0.96
   1  20   4    3.10    0.99
   1 -20  -4    4.61    1.12
  -1  20  -4    2.89    0.86
   2 -20   4   -0.75    0.82
   2  20  -4    0.37    0.60
   2  20   4    0.26    0.72
   2 -20  -4   -4.04    7.79
   0  21  -4    1.08    0.80
   0   0  -5    0.21    0.17
   0   0   5    0.78    1.25
   0   0  -5    0.04    0.20
   0   0  -5   -0.04    0.18
   0   0   5    0.13    0.18
   0   0   5    0.06    0.19
   0   0  -5    1.32    1.79
   0   0  -5    0.84    1.48
   0   0   5    0.09    0.17
   1   0   5   44.69    1.41
   1   0  -5   47.65    1.45
  -1   0  -5   47.64    1.43
   1   0  -5   48.06    1.59
  -1   0  -5   45.79    1.37
  -1   0  -5   47.59    1.13
  -1   0   5   46.57    1.55
   1   0   5   48.13    1.05
  -1   0  -5   46.32    1.37
  -1   0   5   47.43    1.50
   1   0  -5   46.56    1.36
  -1   0   5   45.83    1.52
  -1   0   5   47.15    1.32
   1   0   5   47.23    1.18
   1   0   5   45.82    1.42
   1   0  -5   44.40    1.30
   1   0   5   45.33    1.36
  -2   0   5  100.69    2.90
  -2   0   5  101.95    2.63
   2   0  -5  105.93    2.72
   2   0  -5   98.58    2.19
   2   0  -5   99.45    2.45
  -2   0  -5  102.58    2.41
   2   0   5  100.52    1.53
  -2   0  -5  102.85    2.90
  -2   0   5  100.94    2.24
  -2   0   5  102.57    2.20
   2   0   5   97.47    2.71
  -2   0  -5  102.17    2.15
  -2   0  -5  104.41    2.36
   2   0   5  102.91    2.33
  -2   0   5  102.86    2.47
   2   0   5  102.75    2.32
   2   0  -5   98.41    2.89
   3   0  -5   57.55    1.61
  -3   0  -5   58.87    1.81
  -3   0   5   57.57    1.58
   3   0   5   56.83    1.68
   3   0  -5   57.25    2.26
  -3   0   5   57.76    2.06
  -3   0  -5   58.08    1.87
  -3   0  -5   55.33    1.72
   3   0   5   59.68    2.08
   3   0   5   55.30    2.25
  -3   0   5   57.08    1.62
   3   0  -5   53.93    2.38
  -3   0   5   59.25    2.08
  -4   0   5    6.44    1.79
  -4   0  -5    6.13    1.86
  -4   0   5    3.61    0.41
  -4   0   5    3.84    0.41
   4   0   5    4.98    0.84
   4   0   5    5.06    0.93
  -4   0  -5    4.01    0.50
   4   0   5    3.69    0.44
   4   0  -5    3.52    0.42
  -4   0  -5    6.25    2.81
   4   0  -5    4.60    0.97
  -4   0   5    3.60    0.37
  -4   0   5    3.93    0.69
  -4   0  -5    3.85    0.55
  -4   0  -5    3.92    0.48
   4   0  -5    2.89    0.74
   4   0   5    4.97    0.88
   5   0   5    1.68    0.66
  -5   0  -5    2.13    0.41
   5   0  -5    1.70    0.65
  -5   0   5    1.87    0.29
  -5   0  -5    2.35    2.23
   5   0   5    2.31    0.67
  -5   0   5    2.22    1.16
  -5   0  -5    1.68    0.39
   5   0   5    2.82    0.74
  -5   0   5    2.60    0.62
  -5   0   5    1.91    0.36
   5   0  -5    2.36    0.83
   5   0  -5    1.61    2.28
   6   0   5    3.84    0.97
   6   0  -5    3.45    1.02
  -6   0  -5    0.11    1.63
  -6   0  -5    3.28    0.48
   6   0  -5    4.46    1.02
   6   0  -5    0.92    2.82
  -6   0  -5    3.94    0.54
   6   0   5    2.66    0.90
   7   0  -5    0.94    3.74
   7   0   5    1.38    0.94
   7   0  -5    1.58    0.81
   7   0   5    2.11    0.87
   8   0   5    1.68    1.29
   8   0  -5    1.83    5.74
   0  -1  -5   66.04    6.68
   0   1   5   69.01    5.73
   1  -1   5  329.13    4.80
  -1  -1  -5  327.38    4.97
   1  -1   5  325.32    5.30
  -1   1   5  322.03    5.52
  -1   1   5  322.29    5.61
  -1  -1  -5  321.21    5.19
   1  -1   5  322.23    5.25
   1  -1   5  333.84    4.49
   1   1  -5  322.70    5.50
   1   1  -5  330.67    5.05
  -1   1   5  328.12    5.15
   1  -1   5  321.49    5.24
  -1   1   5  319.41    5.21
  -1  -1  -5  321.78    5.39
   1   1  -5  326.88    5.24
  -1  -1  -5  328.75    5.31
   1  -1  -5  321.24    5.24
   1  -1  -5  321.47    5.08
   1  -1  -5  333.96    5.47
   1   1   5  320.01    5.39
  -1  -1   5  321.27    5.36
  -1   1  -5  329.68    5.31
   1   1   5  324.29    5.19
  -1  -1   5  323.28    5.04
  -1   1  -5  327.24    5.23
   1   1   5  324.24    4.96
  -1  -1   5  319.05    5.24
  -1  -1   5  330.36    5.47
  -2   1   5   46.44    1.45
  -2   1   5   42.64    1.80
  -2   1   5   44.43    1.66
  -2  -1  -5   45.38    1.07
   2  -1   5   44.17    1.67
   2   1  -5   45.99    1.27
  -2  -1  -5   43.20    1.59
  -2  -1  -5   45.42    1.40
  -2  -1  -5   42.84    1.64
   2   1  -5   47.57    1.67
  -2   1   5   44.48    1.29
  -2  -1  -5   44.91    1.34
   2   1  -5   43.19    1.40
   2  -1   5   46.87    1.49
   2   1  -5   47.87    1.91
  -2   1   5   45.18    1.42
   2  -1   5   48.24    1.60
  -2   1  -5   46.68    1.26
   2   1   5   45.07    1.76
  -2  -1   5   45.31    1.46
   2   1   5   45.07    1.36
   2  -1  -5   46.71    1.28
   2  -1  -5   46.21    1.77
   2   1   5   44.88    1.02
  -2   1  -5   46.03    1.58
  -2  -1   5   44.33    1.78
  -2   1  -5   47.01    1.76
  -2  -1   5   46.92    1.64
   2   1   5   45.61    1.49
  -2  -1   5   44.38    1.23
  -2  -1   5   46.07    1.64
  -2   1  -5   46.31    1.51
   2  -1  -5   43.30    1.56
   2  -1  -5   45.32    1.90
  -2   1  -5   45.83    1.42
   3  -1   5   10.78    0.73
   3   1  -5   10.35    0.91
   3  -1   5   10.69    0.85
   3  -1   5    9.48    0.89
  -3   1   5   11.33    0.72
  -3  -1  -5   10.83    0.78
  -3   1   5   10.70    0.68
  -3  -1  -5   10.24    0.67
   3   1  -5    9.79    1.05
  -3   1   5    9.57    0.85
   3  -1   5    9.98    0.92
   3   1  -5    9.75    0.66
  -3   1   5   10.92    0.83
  -3  -1   5   10.28    0.83
   3   1   5   10.64    0.99
   3  -1  -5   10.54    0.78
  -3   1  -5   10.59    0.72
   3  -1  -5   10.57    0.99
  -3   1  -5   11.75    0.78
   3   1   5   10.79    0.90
  -3   1  -5   10.18    0.68
   3   1   5   10.66    0.65
  -3  -1   5   10.41    0.55
  -3  -1   5    9.98    0.88
   3  -1  -5   10.14    1.03
  -3  -1   5   10.12    0.71
   3  -1  -5   10.37    0.57
   4  -1   5    0.33    0.31
  -4   1   5    0.20    0.24
  -4  -1  -5    1.18    1.36
  -4   1   5    0.45    0.30
   4  -1   5    0.09    0.16
  -4  -1  -5    0.23    0.25
  -4  -1  -5    2.00    1.74
   4   1  -5    0.98    1.56
   4   1  -5    0.14    0.23
  -4  -1  -5    2.47    1.39
  -4   1   5    0.86    0.92
   4  -1   5    0.35    0.30
   4   1  -5    0.25    0.31
  -4   1   5    0.52    0.21
  -4   1   5    0.33    0.24
  -4  -1  -5    0.47    0.16
   4   1  -5    0.83    0.41
   4  -1   5    0.97    0.40
  -4   1  -5    0.37    0.30
  -4   1  -5    1.57    1.93
   4   1   5    0.24    0.37
   4   1   5    0.23    0.18
   4  -1  -5    0.93    0.54
  -4  -1   5    1.61    1.05
  -4  -1   5    0.45    0.23
  -4  -1   5    0.50    0.14
  -4  -1   5    0.35    0.16
   4  -1  -5    0.54    2.05
   4  -1  -5    0.51    0.18
  -4   1  -5    0.14    0.15
  -4  -1   5    0.23    0.30
  -4   1  -5    0.32    0.14
   4  -1  -5    0.46    0.49
  -5  -1  -5   12.74    0.76
  -5   1   5   11.22    0.51
   5   1  -5   13.20    1.48
   5  -1   5   12.90    1.32
   5  -1   5   13.30    1.35
  -5  -1  -5    6.13    2.84
  -5  -1  -5   11.70    0.93
  -5   1   5   12.39    0.75
   5   1  -5   11.66    1.33
  -5   1   5   12.33    1.10
  -5  -1  -5   11.64    0.92
  -5   1   5   11.25    0.79
   5  -1   5    9.77    1.41
  -5   1  -5   11.82    0.86
   5  -1  -5    9.86    1.54
  -5  -1   5   11.39    0.81
   5   1   5   12.90    1.39
   5   1   5   11.46    1.29
  -5   1  -5   12.30    0.77
  -5  -1   5   14.42    1.15
  -5   1  -5   11.06    0.72
   5  -1  -5   10.92    1.59
  -6   1   5    1.24    0.57
   6   1  -5    1.66    0.75
   6   1  -5    2.17    0.74
   6  -1   5    1.75    0.69
   6  -1   5    2.10    0.78
  -6  -1  -5   -0.24    1.28
  -6  -1  -5    2.00    0.49
  -6   1   5    2.59    0.42
   6  -1   5    1.10    0.61
  -6  -1  -5   -1.21    1.68
  -6  -1  -5    1.92    0.34
  -6  -1   5    0.41    0.55
  -6   1  -5    1.07    2.14
   6  -1  -5    2.17    0.93
   6   1   5    0.88    0.61
   6   1   5    1.70    0.69
  -6  -1   5    1.97    0.39
   6  -1  -5    1.74    0.92
   6  -1  -5   -1.10    2.96
  -6   1  -5    2.20    0.46
   7  -1   5    3.02    1.11
   7   1  -5   -0.92    3.22
   7   1  -5    2.09    1.09
   7  -1   5    1.60    0.73
   7   1  -5    3.31    1.03
   7  -1  -5   -3.32    3.70
   7   1   5    2.78    0.96
   7  -1  -5    3.13    1.15
   7   1   5    1.89    0.87
   8   1  -5    2.75    5.17
   8  -1   5    5.82    1.46
   0  -2  -5 1000.00   28.71
   1  -2   5  127.83    2.61
  -1  -2  -5  131.43    2.77
  -1  -2  -5  125.90    2.58
  -1  -2  -5  130.35    2.67
   1  -2   5  132.21    2.69
   1  -2   5  132.15    2.77
  -1   2   5  129.36    2.77
   1   2  -5  132.38    2.89
   1   2  -5  130.21    2.77
   1   2  -5  133.06    2.53
  -1  -2   5  129.26    2.50
  -1   2  -5  130.78    2.81
   1  -2  -5  129.52    2.92
  -1  -2   5  125.27    2.76
   1   2   5  128.78    2.64
  -1   2  -5  126.54    2.75
   1   2   5  131.16    2.61
   1   2   5  134.03    2.92
  -1   2  -5  142.13   10.14
   1  -2  -5  130.48    2.57
  -1   2  -5  130.98    2.64
  -1  -2   5  128.17    2.78
   2  -2   5    2.61    0.22
  -2  -2  -5    9.34    4.39
   2  -2   5    3.05    0.44
   2   2  -5    2.77    0.44
   2   2  -5    3.27    0.50
  -2   2   5    2.36    0.33
   2   2  -5    2.40    0.51
  -2  -2  -5    3.34    0.57
  -2   2   5    2.81    0.54
   2  -2   5    2.90    0.35
  -2   2   5    3.80    0.65
  -2   2   5    6.03    4.88
  -2  -2  -5   10.17    3.44
   2   2  -5    7.22    2.40
  -2   2   5    2.38    0.41
  -2  -2  -5    0.58    2.15
   2   2  -5    5.72    4.23
  -2   2   5    3.35    0.36
  -2  -2  -5    2.77    0.31
  -2  -2  -5    2.88    0.42
   2   2  -5    2.69    0.31
   2  -2   5    2.58    0.45
   2  -2   5    3.50    0.59
  -2  -2  -5    2.50    0.47
   2   2   5    3.04    0.43
   2  -2  -5    2.68    0.30
   2  -2  -5   -0.51    4.41
  -2  -2   5    2.78    0.47
  -2   2  -5    2.85    0.32
  -2   2  -5    3.77    4.71
   2   2   5    3.10    0.33
  -2   2  -5    3.43    0.40
  -2   2  -5    2.61    0.46
   2  -2  -5    2.28    0.52
  -2  -2   5    2.48    0.46
  -2   2  -5    2.84    0.45
   2   2   5    2.48    0.44
   2   2   5    2.91    0.58
  -2  -2   5   13.75    5.65
   2  -2  -5    5.31    1.31
  -2  -2   5    2.52    0.29
  -2   2  -5    2.41    0.52
   2  -2  -5    2.76    0.50
  -2  -2   5    3.18    0.57
   3  -2   5    2.35    0.53
  -3  -2  -5    0.67    2.71
   3   2  -5    1.96    0.41
  -3   2   5    3.52    1.56
   3  -2   5    2.27    0.44
   3   2  -5    2.29    0.53
  -3   2   5    2.39    0.50
  -3   2   5    2.26    0.27
  -3  -2  -5    1.62    0.46
  -3  -2  -5    0.28    2.42
   3   2  -5    3.10    0.72
  -3   2   5    2.76    0.46
   3  -2   5    2.27    0.55
   3   2  -5    1.12    3.91
   3   2  -5    2.65    1.78
   3  -2   5    2.56    0.57
  -3  -2  -5    2.12    0.36
  -3   2   5    2.37    0.43
  -3  -2  -5    2.68    0.26
  -3  -2  -5    2.36    0.45
  -3   2  -5    2.53    0.39
  -3  -2   5    2.72    0.48
  -3  -2   5    1.49    1.27
  -3   2  -5    2.32    0.43
   3  -2  -5    2.57    0.62
  -3   2  -5    2.34    4.46
   3   2   5    3.19    0.65
   3  -2  -5    2.44    0.25
   3  -2  -5    2.82    0.70
   3  -2  -5   -2.47    4.06
  -3  -2   5    2.76    0.26
  -3   2  -5    2.61    0.49
   3   2   5    2.40    0.58
   3  -2  -5    2.55    0.51
   3   2   5    3.14    0.36
  -3  -2   5    3.46    1.80
  -3  -2   5    2.97    0.60
  -4   2   5   19.62    2.69
  -4   2   5   15.84    0.94
   4   2  -5   15.31    1.48
   4   2  -5   16.19    1.34
   4   2  -5   17.08    2.64
   4  -2   5   15.98    1.25
  -4  -2  -5   14.95    0.78
  -4   2   5   15.56    1.16
   4  -2   5   14.72    1.32
   4  -2   5   16.20    1.00
  -4  -2  -5   16.92    3.01
  -4  -2  -5   14.49    1.04
   4  -2   5   15.20    1.30
  -4   2   5   12.56    1.02
   4   2  -5   16.24    1.00
  -4   2   5   14.42    0.94
  -4  -2  -5   20.66    4.48
  -4  -2   5   20.83    2.93
   4   2   5   13.39    1.36
  -4  -2   5   16.02    1.16
   4  -2  -5   15.39    1.49
   4  -2  -5   14.52    1.42
   4  -2  -5   13.80    0.97
   4   2   5   15.05    0.74
  -4  -2   5   15.25    2.27
   4   2   5   15.83    1.33
  -4   2  -5   14.30    0.76
  -4  -2   5   15.90    1.03
  -4   2  -5   16.51    1.07
  -5   2   5    0.19    0.25
  -5  -2  -5    1.47    1.82
  -5   2   5    0.03    0.24
   5   2  -5   -1.76    1.57
  -5  -2  -5   -0.62    0.21
   5  -2   5   -0.75    0.34
   5  -2   5    0.45    0.43
   5   2  -5   -0.03    0.31
  -5   2   5   -0.21    0.26
   5   2  -5   -0.29    0.35
   5  -2   5    0.24    0.35
  -5   2   5    1.50    1.06
  -5  -2  -5    0.27    1.03
   5   2   5    0.16    0.28
   5  -2  -5    0.72    2.26
  -5   2  -5    0.48    1.75
   5  -2  -5    0.06    0.39
   5   2   5    0.58    0.49
  -5  -2   5   -0.06    0.26
   5  -2  -5   -0.07    0.37
  -5   2  -5   -0.26    0.13
  -5   2  -5    0.67    1.89
  -5   2  -5    0.76    0.36
  -5  -2   5   -0.65    0.24
   6  -2   5    0.63    0.64
  -6   2   5    0.86    0.51
  -6   2   5    1.36    0.37
   6   2  -5    1.55    0.73
   6  -2   5    1.26    0.61
  -6  -2  -5   -0.73    1.25
   6   2  -5    1.65    3.20
  -6  -2  -5    1.86    0.45
   6  -2  -5    1.15    2.80
   6   2   5    1.79    0.68
   6  -2  -5    2.34    0.81
  -6   2  -5    0.32    2.07
  -6   2  -5    1.09    1.42
   6   2   5    0.97    0.54
  -6  -2   5    0.62    0.49
  -6  -2   5    0.83    0.38
  -6   2  -5    0.94    0.36
   7   2  -5   -0.52    3.71
   7  -2   5    2.84    1.03
   7  -2   5    1.67    0.77
   7   2  -5    1.78    0.88
   7   2  -5    0.93    0.78
   7   2   5    1.61    0.93
   7   2   5    2.78    0.95
   7  -2  -5    0.59    3.65
   8  -2   5    5.52    1.53
   8   2  -5   -2.47    6.32
   0  -3  -5    8.18    0.46
   0  -3   5    8.01    0.40
   0  -3   5    8.32    0.63
   0   3  -5    8.03    0.60
   0   3   5    7.90    0.51
   0  -3  -5    8.46    0.64
   0  -3  -5    8.15    0.65
   0   3  -5    8.02    0.44
   0   3   5    7.70    0.67
   0   3   5    7.53    0.59
   0  -3   5    8.20    0.59
   0   3  -5    8.40    0.61
   1  -3   5   33.23    1.21
   1   3  -5   36.54    1.18
  -1  -3  -5   34.71    1.25
   1   3  -5   35.13    2.86
  -1  -3  -5   34.89    1.31
   1   3  -5   36.06    1.36
   1  -3   5   34.68    1.30
  -1   3   5   34.80    1.43
  -1  -3  -5   34.92    1.27
  -1   3   5   32.67    1.30
   1   3  -5   35.26    1.34
   1   3   5   34.78    1.26
  -1  -3   5   35.41    1.27
  -1   3  -5   34.42    1.34
  -1  -3   5   35.59    1.13
  -1   3  -5   34.83    1.21
   1   3   5   35.80    1.25
  -1   3  -5   33.43    1.28
   1  -3  -5   35.32    1.44
   1   3   5   35.55    1.39
  -1  -3   5   34.27    1.34
   1  -3  -5   34.12    1.16
   2   3  -5  103.45    2.47
   2  -3   5  104.72    2.87
  -2   3   5  107.80    3.11
  -2   3   5  104.78    2.07
  -2   3   5  106.95    2.68
  -2   3   5  105.03    2.86
   2   3  -5  101.94    2.63
  -2  -3  -5  100.94    2.51
   2   3  -5  103.95    2.08
  -2  -3  -5  103.90    2.35
  -2  -3  -5  100.88    2.84
   2  -3   5  106.88    2.37
   2  -3   5  104.51    2.04
  -2  -3  -5  107.08    2.37
   2   3  -5  106.23    3.05
   2  -3   5  105.75    2.65
   2  -3  -5  102.02    2.10
   2  -3  -5  105.35    3.02
   2   3   5  105.09    3.01
   2   3   5  105.03    2.33
  -2   3  -5  107.46    2.98
  -2   3  -5  106.52   13.62
  -2   3  -5  106.25    2.72
   2   3   5  106.28    2.66
  -2   3  -5  103.55    2.09
  -2  -3   5  106.20    2.89
  -2  -3   5  106.96    2.90
   2   3   5  104.22    2.31
  -2   3  -5  105.49    2.30
  -2  -3   5  103.86    2.69
   2  -3  -5  106.82    2.80
  -2  -3   5  106.58    2.06
  -3   3   5   21.43    1.00
   3  -3   5   19.66    1.09
  -3  -3  -5   20.43    0.89
   3  -3   5   21.14    1.14
   3   3  -5   19.87    1.10
  -3   3   5   21.42    1.28
   3   3  -5   10.21    6.10
   3   3  -5   20.28    1.20
  -3  -3  -5   20.50    1.20
  -3  -3  -5   19.02    1.18
  -3   3   5   21.39    1.17
   3  -3   5   19.45    1.24
  -3  -3  -5   20.82    0.89
  -3   3  -5   21.00    1.13
  -3   3  -5   20.56    1.19
   3  -3  -5   22.10    1.72
   3  -3  -5   19.60    0.65
  -3   3  -5   20.15    0.87
   3   3   5   19.75    0.86
   3  -3  -5   19.76    1.15
  -3  -3   5   20.16    1.16
  -3  -3   5   19.25    1.15
  -3   3  -5   19.14    0.99
   3   3   5   21.05    1.29
   4  -3   5   24.01    1.59
  -4   3   5   26.20    1.29
  -4   3   5   24.89    1.31
   4  -3   5   25.67    1.73
  -4   3   5   23.16    1.24
   4   3  -5   23.38    1.50
   4   3  -5   18.58    3.44
  -4  -3  -5   26.66    1.48
  -4  -3  -5   17.91    3.09
  -4  -3  -5   25.57    0.92
  -4  -3  -5   18.99    4.99
   4   3  -5   25.65    1.92
  -4   3   5   24.20    1.46
   4  -3   5   24.89    1.53
   4   3  -5   26.10    1.61
  -4  -3  -5   25.96    1.06
   4   3   5   25.08    1.79
  -4   3  -5   25.86    1.42
   4  -3  -5   25.80    1.86
  -4  -3   5   17.19    2.93
   4   3   5   25.28    1.66
  -4   3  -5   25.58    0.92
   4   3   5   24.18    0.90
  -4  -3   5   25.43    1.46
  -4  -3   5   25.77    1.40
  -5  -3  -5    4.04    4.00
  -5  -3  -5    0.58    0.49
  -5   3   5    1.97    1.49
   5  -3   5    1.77    0.65
  -5  -3  -5    2.97    1.71
   5  -3   5    1.93    0.67
   5  -3   5    0.88    0.57
  -5   3   5    1.36    0.53
  -5   3   5    0.51    0.38
   5   3  -5    2.39    0.78
   5   3  -5    0.74    0.45
  -5  -3  -5    4.58    1.88
   5   3  -5   -0.40    1.77
  -5  -3   5    1.12    0.44
   5   3   5    1.40    0.63
   5   3   5    1.11    0.51
   5  -3  -5    1.87    0.73
  -5  -3   5    0.85    0.44
  -5  -3   5    2.80    1.71
  -5   3  -5    3.94    1.91
   5  -3  -5   -0.08    1.81
  -5   3  -5    2.02    2.01
  -5   3  -5    1.00    0.41
   6  -3   5    2.99    0.95
  -6   3   5    2.45    0.47
   6   3  -5    2.41    0.94
   6  -3   5    3.17    0.92
  -6  -3  -5   -0.28    1.64
   6  -3   5    2.27    0.75
  -6  -3  -5    2.79    0.67
   6   3  -5    1.34    0.71
   6  -3  -5    3.90    1.06
   6   3   5    2.66    0.90
   6  -3  -5    0.34    2.32
   6   3   5    3.92    1.05
  -6   3  -5   -0.21    1.98
  -6  -3   5    2.58    0.71
  -6   3  -5    3.14    0.65
   7  -3   5    4.57    1.16
   7   3  -5    5.76    1.47
   7   3  -5    4.70    1.11
   7   3   5    9.15    1.58
   7  -3  -5   -0.71    3.02
   7   3   5    4.09    1.42
   7  -3  -5    5.47    1.27
   8  -3   5    0.86    0.95
   8   3  -5    1.94    7.35
   8   3  -5   -0.37    0.87
   1  -4   5   15.56    0.81
  -1  -4  -5   16.61    0.93
  -1   4   5   15.25    0.92
   1   4  -5   16.08    0.92
   1  -4   5   15.77    0.86
   1   4  -5   16.57    0.81
  -1   4   5   16.49    1.05
  -1  -4  -5   16.19    0.94
   1  -4   5   15.89    0.91
  -1   4   5   15.99    0.46
   1   4  -5   15.97    0.93
  -1  -4   5   15.92    0.85
   1  -4  -5    7.49    5.38
   1   4   5   17.40    1.00
  -1   4  -5   16.84    0.92
  -1   4  -5   15.18    0.82
   1   4   5   16.06    0.91
   1   4   5   16.99    0.89
   1  -4  -5   17.45    0.99
  -1  -4   5   15.34    0.76
  -1  -4   5   15.40    0.95
  -1   4  -5   15.50    0.94
   1  -4  -5   16.31    1.01
  -2  -4  -5   64.81    1.86
  -2   4   5   65.41    2.29
   2   4  -5   66.68    2.39
   2  -4   5   66.18    1.99
  -2  -4  -5   68.34    1.86
  -2  -4  -5   66.35    2.30
   2   4  -5   67.34    1.61
   2   4  -5   66.70    1.80
  -2  -4  -5   68.07    1.96
   2  -4   5   66.95    2.26
   2   4  -5   66.54    2.14
   2  -4   5   66.59    1.80
   2  -4   5   64.95    1.67
   2  -4   5   65.89    2.10
  -2   4   5   65.40    1.31
  -2   4   5   65.68    2.43
  -2   4  -5   67.22    1.61
  -2  -4   5   67.75    1.58
   2  -4  -5   68.70    2.40
   2  -4  -5   65.45    1.62
  -2   4  -5   66.88    2.32
  -2   4  -5   67.06    1.76
  -2   4  -5   67.79    2.19
  -2  -4   5   67.24    2.21
   2   4   5   70.35    2.15
   2   4   5   69.59    1.94
   2   4   5   65.64    2.39
   2  -4  -5   64.80    2.21
  -2  -4   5   66.38    2.29
   2   4   5   67.56    1.82
  -3  -4  -5    0.72    0.25
  -3   4   5    0.69    0.34
  -3  -4  -5    0.80    0.25
   3   4  -5   -0.38    1.13
   3   4  -5    0.68    0.14
   3   4  -5    0.97    0.36
  -3  -4  -5    0.83    0.59
   3   4  -5    0.88    2.24
   3   4  -5    0.07    0.33
   3  -4   5    0.98    0.36
  -3  -4  -5    0.68    0.34
   3  -4   5    0.70    0.34
   3   4  -5    0.43    0.27
  -3   4   5    0.97    0.25
   3  -4   5    0.45    0.19
  -3  -4  -5    2.34    3.61
  -3  -4  -5    2.21    1.84
  -3  -4  -5    0.65    0.36
   3   4   5    0.77    0.39
  -3   4  -5    1.14    2.04
  -3   4  -5    0.99    0.40
   3   4   5    0.21    0.27
  -3   4  -5    0.57    0.24
   3  -4  -5    0.53    0.31
  -3   4  -5    0.85    0.22
   3  -4  -5    1.10    0.82
   3  -4  -5    0.88    1.86
   3  -4  -5    0.59    0.39
  -3  -4   5    1.08    0.35
  -3  -4   5    2.10    2.17
   3   4   5    1.05    0.24
   4   4  -5   28.44    1.65
   4   4  -5   26.05    4.42
  -4  -4  -5   28.11    2.32
  -4   4   5   30.02    1.50
  -4   4   5   29.98    1.53
  -4  -4  -5   24.15    3.69
  -4  -4  -5   28.51    1.15
  -4   4   5   23.51    3.51
  -4  -4  -5   19.85    5.49
   4   4  -5   33.06    2.17
   4  -4   5   29.42    1.74
  -4  -4  -5   29.68    3.14
  -4   4   5   30.46    1.68
   4  -4   5   29.51    1.91
   4  -4  -5   27.03    1.94
  -4  -4   5   30.12    1.60
  -4  -4   5   28.64    1.58
  -4   4  -5   29.09    0.92
  -4   4  -5   20.47    3.67
   4   4   5   31.26    2.02
  -4  -4   5   23.26    3.77
  -4   4  -5   29.68    1.60
   4   4   5   30.76    1.89
  -4   4  -5   30.49    1.50
   4   4   5   29.77    0.96
  -5  -4  -5    2.07    1.41
   5  -4   5    1.79    0.61
  -5  -4  -5    0.45    1.31
  -5  -4  -5    1.50    2.39
  -5  -4  -5    2.14    0.33
   5   4  -5    0.84    1.91
   5   4  -5    2.36    0.67
  -5   4   5    2.42    0.64
  -5  -4  -5    2.11    0.64
   5  -4   5    2.35    0.87
   5   4  -5    2.81    1.08
  -5  -4  -5    2.21    0.46
   5   4  -5   -1.88    2.40
  -5   4  -5    3.49    0.72
  -5  -4   5    1.84    0.48
   5  -4  -5    2.95    0.92
   5   4   5    3.74    0.97
  -5   4  -5    3.02    2.14
  -5   4  -5    0.23    2.26
  -5  -4   5    0.81    1.63
  -5  -4   5    1.30    0.56
   5   4   5    2.01    0.77
   5  -4  -5    1.52    2.54
   6   4  -5   -0.30    2.16
   6  -4   5    0.04    0.42
  -6  -4  -5    1.08    2.11
  -6   4   5   -0.25    0.30
  -6  -4  -5   -0.09    0.38
   6   4  -5    0.44    0.60
  -6   4   5   -0.64    0.38
  -6  -4  -5    0.62    1.45
   6   4  -5    0.57    0.52
   6  -4   5    1.09    0.45
  -6  -4   5   -0.26    0.42
  -6   4  -5   -0.88    0.37
  -6   4  -5   -0.03    1.85
  -6  -4   5   -1.20    0.44
   6   4   5    1.10    0.54
   6   4   5    0.34    0.45
   6  -4  -5   -1.59    1.62
   6  -4  -5    0.40    0.71
   7  -4   5    1.31    0.76
   7   4  -5    0.75    0.78
   7   4  -5   -0.33    3.91
   7   4  -5    1.08    0.90
   7   4   5   -0.04    0.80
   7   4   5    2.01    1.08
   7  -4  -5    1.02    0.82
   8   4  -5   -1.92    0.96
   8  -4   5   -0.26    1.12
   8   4  -5   -6.59   12.57
   0   5  -5   10.57    0.60
   0   5   5   10.91    0.75
   0   5   5   19.18    4.07
   0   5  -5   10.25    0.68
   0   5  -5   18.54    5.93
   0   5   5   11.21    0.88
   0  -5   5   10.71    0.81
   0   5   5   21.52    6.33
   0   5   5   10.55    0.77
   0  -5  -5   17.32    4.60
   0  -5   5    9.82    0.71
   0   5  -5    7.26    1.91
   0   5  -5   10.69    0.79
   0  -5   5   24.67    6.80
   0  -5  -5   23.26    6.33
   0   5  -5    9.58    0.73
   0  -5  -5   11.57    1.02
   0  -5  -5   10.03    0.59
   1  -5   5   22.83    1.18
  -1   5   5   36.51    6.04
  -1  -5  -5   24.56    1.24
   1  -5   5   24.79    1.14
  -1   5   5   23.81    0.53
   1   5  -5   19.39    2.86
   1   5  -5   23.24    1.22
   1  -5   5   23.58    1.11
  -1   5   5   23.92    1.34
   1   5  -5   27.08    5.60
  -1  -5  -5   38.82    7.48
  -1  -5  -5   23.33    1.16
   1  -5   5   36.69    6.48
   1   5  -5   23.15    1.15
   1   5  -5   21.79    1.02
  -1  -5   5   23.62    1.26
  -1   5  -5   23.63    1.24
  -1  -5   5   24.03    1.06
   1   5   5   23.98    1.21
   1   5   5   23.63    1.13
   1   5   5   23.52    1.21
   1  -5  -5   24.69    1.32
   1  -5  -5   34.80    5.54
  -1  -5   5   23.14    1.02
  -1   5  -5   23.25    1.08
  -1  -5   5   37.59    6.71
   1  -5  -5   23.55    1.21
  -1   5  -5   23.23    1.16
   2   5  -5    8.31    0.57
   2  -5   5    8.08    0.80
   2   5  -5    8.08    0.86
  -2   5   5   18.54    4.89
   2  -5   5    7.91    0.65
  -2  -5  -5    7.03    0.58
   2   5  -5    8.23    2.54
   2   5  -5   21.46    7.00
   2   5  -5   13.49    3.68
  -2  -5  -5    7.01    0.77
   2   5  -5    8.55    0.75
   2  -5   5    7.38    0.59
  -2  -5  -5    7.89    0.69
   2  -5   5    7.58    0.60
  -2   5   5    8.25    0.84
  -2   5   5   11.38    3.65
  -2  -5  -5   10.85    3.94
   2  -5   5    6.85    0.79
  -2  -5  -5   13.44    5.77
   2   5  -5    8.23    0.55
   2  -5  -5   10.77    3.39
   2  -5  -5    6.38    1.84
  -2  -5   5    8.12    0.53
  -2   5  -5    8.26    0.61
   2   5   5    6.31    0.78
  -2   5  -5   12.02    4.53
  -2   5  -5    8.26    0.55
  -2  -5   5    6.92    0.75
   2  -5  -5    7.43    0.75
  -2  -5   5   13.60    5.02
   2   5   5    8.01    0.63
  -2  -5   5    8.31    0.75
   2   5   5   17.99    4.51
   2   5   5   17.83    6.49
   2  -5  -5    7.77    0.55
  -2   5  -5    7.35    0.75
   2   5   5    7.80    0.73
   2  -5  -5    0.61    3.99
   2   5   5    7.44    0.68
   2  -5  -5    8.82    0.88
  -2   5  -5    7.55    0.91
   3  -5   5    3.36    0.64
  -3  -5  -5    8.23    2.70
  -3   5   5    3.04    0.64
   3   5  -5    3.20    0.28
   3   5  -5    4.31    2.50
  -3   5   5    5.85    2.21
  -3  -5  -5    3.16    0.66
   3  -5   5    3.22    0.39
  -3   5   5    2.66    0.29
  -3  -5  -5    3.14    0.52
   3   5  -5    6.53    2.73
   3   5  -5    3.91    0.81
   3   5  -5    2.87    0.52
  -3  -5  -5    3.12    0.52
   3  -5   5    2.90    0.70
   3  -5   5    2.59    0.41
  -3  -5  -5    9.39    3.88
   3  -5  -5    2.97    0.26
   3  -5  -5    3.32    0.78
  -3  -5   5    7.18    2.87
  -3   5  -5    3.57    0.66
  -3   5  -5    8.56    3.03
   3   5   5    3.69    0.76
   3   5   5    3.41    0.71
  -3   5  -5    3.06    0.36
   3  -5  -5    0.86    1.80
   3  -5  -5    3.42    0.26
   3  -5  -5    6.63    1.73
  -3  -5   5    2.90    0.65
  -3   5  -5    2.52    0.46
   3   5   5    2.68    0.40
  -4  -5  -5   10.28    4.14
   4  -5   5   11.93    0.52
   4   5  -5   13.27    1.40
  -4   5   5   12.77    1.22
   4   5  -5   11.68    3.90
  -4  -5  -5   14.19    1.19
   4   5  -5   11.97    1.04
  -4  -5  -5   12.83    1.55
  -4  -5  -5    9.03    2.95
  -4   5   5   11.59    0.75
  -4  -5  -5   11.10    0.83
  -4   5   5   11.96    1.11
   4  -5   5   15.21    1.42
   4  -5  -5   12.02    1.36
  -4  -5   5   11.34    1.05
  -4  -5   5    8.77    3.43
  -4   5  -5   12.44    3.72
  -4  -5   5   11.69    1.06
   4   5   5   11.72    0.56
   4   5   5   11.49    1.31
  -4   5  -5   11.82    1.04
  -4   5  -5   11.10    0.52
  -4   5  -5   11.73    0.92
   4   5   5   11.78    1.24
   5  -5   5    2.75    0.82
  -5  -5  -5    0.73    2.42
   5  -5   5    4.53    0.93
   5   5  -5   -0.17    3.55
  -5   5   5    3.76    0.74
  -5  -5  -5    4.09    1.96
   5   5  -5    4.56    1.11
   5   5  -5    2.79    0.79
  -5   5   5    2.78    0.55
   5   5  -5    0.82    2.18
  -5  -5  -5    3.83    0.78
  -5  -5  -5    4.21    1.55
  -5  -5  -5    3.34    0.53
  -5   5   5    3.87    0.74
  -5  -5   5    4.02    2.28
  -5  -5   5    4.08    0.84
   5   5   5    3.17    0.84
   5   5   5    3.30    0.94
   5  -5  -5    2.84    4.01
   5  -5  -5    3.08    0.93
  -5  -5   5    4.00    0.81
  -5   5  -5    3.86    0.78
  -6  -5  -5    0.45    1.37
  -6   5   5    3.76    0.75
  -6   5   5    3.02    0.73
  -6  -5  -5    3.78    0.84
  -6  -5  -5   -0.53    2.26
   6   5  -5    4.15    0.98
   6   5  -5    5.25    1.20
   6  -5   5    3.60    0.99
   6   5  -5   -0.90    3.50
   6  -5   5    2.84    0.92
  -6  -5   5    2.39    0.74
  -6   5  -5    3.18    0.79
  -6  -5   5    3.59    0.84
  -6   5  -5   -0.04    1.91
   6  -5  -5    6.02    1.13
   6  -5  -5    0.32    2.98
  -6  -5   5    0.93    1.72
   6   5   5    3.98    1.10
   6   5   5    2.78    0.89
   7  -5   5    2.30    0.89
   7   5  -5    3.25    4.54
   7  -5   5    3.94    1.02
   7   5  -5    1.39    1.00
   7   5  -5    4.11    1.06
   7  -5  -5    2.65    4.40
   7   5   5    3.21    1.10
   7  -5  -5    3.40    1.00
   7   5   5    4.79    1.56
   0  -6  -5  243.17    4.21
   0   6  -5  239.24    4.19
   0   6  -5  250.10    4.84
   0  -6   5  250.73    4.98
   0  -6   5  250.60    4.98
   0   6  -5  242.19    4.85
   0  -6  -5  240.94    5.13
   0   6   5  250.49    5.19
   0   6   5  250.64    4.31
   0   6  -5  248.19    4.22
   0  -6   5  245.16    4.74
  -1  -6  -5   28.34    5.32
   1   6  -5   19.96    1.19
   1   6  -5   21.92    1.08
  -1  -6  -5   36.37    7.34
  -1   6   5   30.49    5.48
   1   6  -5   24.14    4.83
   1   6  -5   21.33    3.85
   1  -6   5   22.29    1.15
  -1  -6  -5   19.11    1.23
  -1  -6  -5   21.43    1.27
  -1  -6  -5   20.31    1.21
  -1   6   5   21.32    1.32
   1   6  -5   19.10    1.08
  -1  -6   5   20.60    1.16
   1   6   5   20.84    1.22
  -1  -6   5   22.79    1.30
   1  -6  -5   25.81    4.90
  -1   6  -5   20.39    1.10
  -1   6  -5   20.85    1.09
  -1  -6   5   22.70    1.05
  -1   6  -5   31.22    6.16
   1  -6  -5   26.94    4.54
   1  -6  -5   20.27    1.18
   1   6   5   23.15    1.23
   2   6  -5   31.46    5.59
   2  -6   5   29.49    1.54
  -2  -6  -5   29.20    1.14
   2   6  -5   29.74    1.14
  -2  -6  -5   32.27    1.53
   2   6  -5   30.37    1.62
  -2  -6  -5   29.41    1.59
   2  -6   5   29.74    1.30
   2   6  -5   37.17    4.84
   2   6  -5   29.51    1.00
   2  -6   5   30.79    1.28
  -2   6   5   29.19    1.62
   2  -6   5   28.08    1.24
   2  -6  -5   30.96    3.76
  -2   6  -5   29.16    1.12
   2   6   5   27.88    1.44
  -2  -6   5   29.29    1.10
  -2  -6   5   30.55    1.62
  -2   6  -5   29.70    1.22
   2  -6  -5   29.72    1.14
  -2   6  -5   27.34    1.49
   2   6   5   28.76    1.25
   2  -6  -5   38.76    5.34
   2  -6  -5   30.31    1.69
   2   6   5   28.65    1.61
   2   6   5   29.86    1.44
   3   6  -5    1.23    0.52
  -3  -6  -5    2.72    1.85
  -3  -6  -5    0.72    0.35
  -3  -6  -5    1.20    0.39
  -3  -6  -5    0.85    0.39
   3  -6   5    0.66    0.40
   3   6  -5    2.65    0.99
   3   6  -5    1.42    1.89
   3  -6   5    1.20    0.29
  -3   6   5    3.08    1.63
   3   6  -5    3.25    1.04
   3   6  -5    0.69    0.17
   3   6  -5    0.53    0.26
   3  -6   5    0.65    0.27
   3   6  -5    1.23    1.83
   3  -6   5    0.86    0.36
  -3   6   5    0.62    0.40
  -3  -6   5    1.46    0.45
   3  -6  -5   -0.49    1.51
   3   6   5    0.77    0.47
  -3   6  -5    1.01    0.30
  -3   6  -5    1.70    0.49
   3  -6  -5    1.25    0.52
   3   6   5    1.23    0.46
   3  -6  -5    1.15    0.22
   3  -6  -5    3.19    1.49
   3  -6  -5    0.89    0.21
   3   6   5    0.87    0.24
  -3  -6   5    2.98    2.36
  -3   6  -5    1.10    0.24
  -4  -6  -5    1.75    0.57
   4   6  -5    1.32    0.42
   4   6  -5    0.14    1.90
  -4  -6  -5    2.60    2.68
  -4  -6  -5    1.27    0.39
   4  -6   5    1.59    0.62
  -4  -6  -5    0.87    1.40
   4  -6   5    1.13    0.44
  -4   6   5    1.12    0.58
  -4   6   5    0.94    0.27
  -4   6   5    1.89    0.55
   4  -6   5    1.28    0.33
   4   6  -5    0.73    0.53
  -4   6  -5    0.93    0.41
  -4   6  -5    1.26    0.48
  -4  -6   5    1.44    0.57
   4  -6  -5    1.34    2.22
  -4  -6   5    0.85    1.76
   4   6   5    1.15    0.51
  -4   6  -5    1.06    0.22
   4  -6  -5    0.73    0.54
   4   6   5    0.42    0.41
   4   6   5    1.05    0.25
  -5  -6  -5   -0.23    1.00
  -5   6   5   -0.26    0.23
  -5   6   5   -0.49    0.22
  -5  -6  -5    0.03    0.25
   5  -6   5    1.18    0.63
  -5  -6  -5    1.52    2.32
   5  -6   5   -0.11    0.36
  -5   6   5    0.14    0.45
   5   6  -5    2.48    2.71
   5   6  -5    0.00    0.38
   5   6  -5   -0.46    0.29
  -5  -6  -5    0.48    0.39
   5   6   5   -0.80    0.36
  -5   6  -5    0.23    0.37
   5  -6  -5    0.50    0.52
  -5  -6   5    1.24    1.81
   5  -6  -5   -0.01    1.75
  -5  -6   5    0.15    0.32
  -5  -6   5    0.37    0.35
   5   6   5    0.62    0.55
   6   6  -5    5.30    4.43
   6   6  -5    2.17    0.94
   6  -6   5    1.97    0.73
  -6  -6  -5   -0.12    1.51
   6   6  -5    2.52    0.75
  -6   6   5    1.79    0.59
  -6   6   5    1.72    0.62
  -6  -6  -5    3.05    0.82
   6  -6   5    3.03    0.99
   6  -6  -5    2.09    0.81
  -6  -6   5    0.57    2.34
   6  -6  -5    0.81    3.03
  -6   6  -5    1.86    0.66
  -6   6  -5   -0.70    2.25
   6   6   5    2.32    0.90
  -6  -6   5    1.74    0.59
   6   6   5    1.16    0.67
  -6  -6   5    2.20    0.68
   7  -6   5    8.97    1.34
   7   6  -5    3.21    5.00
  -7  -6  -5    9.25    2.12
   7   6  -5    8.53    1.41
   7   6   5    7.57    1.67
   7  -6  -5    1.81    4.38
   7   6   5   11.43    1.87
   1   7  -5   17.26    3.38
   1  -7   5   13.09    0.95
   1   7  -5   13.32    0.94
   1  -7   5   13.44    0.98
  -1  -7  -5   14.30    1.10
  -1   7   5   12.69    1.08
   1   7  -5   13.81    0.55
  -1  -7  -5   13.93    0.95
  -1  -7  -5   30.95    8.55
   1   7  -5   13.07    0.88
  -1  -7   5   33.62    9.13
   1   7   5   14.54    1.02
   1  -7  -5   14.58    0.94
  -1   7  -5   12.81    0.89
  -1  -7   5   13.86    0.87
  -1   7  -5   13.43    1.02
   1   7   5   14.27    0.99
   1  -7  -5   14.01    1.01
   1   7   5   14.02    1.07
   1  -7  -5   22.47    5.78
   1  -7  -5   23.94    4.48
   1  -7  -5   14.31    0.40
  -1  -7   5   13.74    1.08
   2  -7   5    4.04    0.56
  -2  -7  -5    4.81    0.84
  -2   7   5    4.17    0.77
   2  -7   5    4.30    0.54
   2  -7   5    8.36    4.83
  -2  -7  -5    5.28    2.58
   2   7  -5    4.96    2.76
  -2  -7  -5    5.20    5.34
   2   7  -5    2.40    0.60
   2  -7   5    3.24    0.56
   2  -7   5    4.11    0.72
  -2  -7  -5    3.23    0.38
   2   7  -5    4.50    0.50
   2   7  -5   10.58    5.02
   2   7  -5    3.55    0.32
  -2  -7   5    6.90    4.56
   2   7   5    3.07    0.69
  -2   7  -5    3.00    0.46
   2   7   5    2.15    0.52
  -2   7  -5    3.52    0.54
   2  -7  -5    4.29    2.28
   2  -7  -5    2.90    0.67
   2  -7  -5    4.49    0.50
  -2   7  -5    4.03    0.75
  -2  -7   5    3.86    0.87
   2   7   5    3.55    0.66
   2   7   5    3.77    0.69
   2  -7  -5    2.21    1.32
   3   7  -5    0.42    0.23
  -3   7   5    0.49    0.48
  -3  -7  -5    0.46    0.40
  -3   7   5    1.07    1.74
  -3  -7  -5    0.83    2.10
   3   7  -5    0.84    0.51
   3   7  -5    1.14    1.02
  -3  -7  -5    2.60    1.71
   3   7  -5    1.20    0.24
  -3  -7  -5    1.15    0.29
   3  -7   5    0.90    0.38
   3  -7   5    0.72    0.23
   3   7  -5    1.26    0.99
   3   7  -5    0.48    1.61
   3  -7   5    0.84    0.36
   3  -7   5    0.85    0.47
  -3  -7   5    2.14    1.66
  -3  -7   5    0.55    0.43
  -3  -7   5    0.55    0.55
   3  -7  -5    1.32    0.25
   3   7   5    1.58    0.59
   3  -7  -5   -0.37    1.71
   3   7   5    0.84    0.35
  -3   7  -5    0.85    0.25
   3  -7  -5    0.89    0.52
   3   7   5    0.76    0.23
   3   7   5    1.43    1.08
   3  -7  -5    1.10    1.32
  -3   7  -5    0.96    0.35
  -3   7  -5    0.71    0.38
   3   7   5    1.37    0.53
  -4  -7  -5    2.10    1.81
   4  -7   5    4.24    0.77
   4  -7   5    5.32    0.65
   4   7  -5    4.63    0.68
   4  -7   5    5.74    1.09
  -4   7   5    5.93    0.90
   4   7  -5    6.14    1.19
  -4   7   5    2.86    1.55
  -4   7   5    5.81    0.95
  -4  -7  -5    1.86    2.38
  -4  -7  -5    4.13    0.88
   4   7   5    5.04    1.08
  -4   7  -5    5.01    0.38
  -4   7  -5    4.12    0.81
  -4  -7   5    1.39    2.40
   4   7   5    5.26    0.44
  -4  -7   5    3.72    0.74
   4   7   5    4.91    0.97
   4  -7  -5    5.84    1.16
   4  -7  -5    0.98    2.30
   5  -7   5    2.89    0.68
  -5  -7  -5    2.80    0.64
  -5   7   5    2.83    0.69
   5   7  -5    3.21    0.84
   5   7  -5    0.53    1.95
  -5   7   5    2.80    0.66
   5  -7   5    2.09    0.77
  -5  -7  -5    0.12    1.47
  -5  -7  -5    2.48    2.31
  -5  -7   5    2.84    0.74
   5   7   5    3.49    0.93
   5   7   5    3.03    0.88
   5  -7  -5    1.02    2.07
  -5  -7   5    2.78    0.69
  -5   7  -5    3.00    0.79
   5  -7  -5    3.16    0.91
  -5  -7   5    2.97    1.96
  -6   7   5    0.08    0.48
  -6  -7  -5   -1.53    2.09
   6   7  -5    0.04    0.50
   6   7  -5   -1.51    3.02
   6  -7   5   -0.26    0.57
[truncated: 1,031,279 more chars]
