# Supplementary material for: Rapid functionalization of multiple C–H bonds in unprotected alicyclic amines
Source: Springer Nature journal article supplement (doi:10.1038/s41557-020-0438-z), 2020-03-30
Supplement: 41557_2020_438_MOESM187_ESM.mol [file 41557_2020_438_MOESM187_ESM.mol]

nchem.19081579B-comp13q.mol
  ChemDraw02072011162D

 21 23  0  0  1  0  0  0  0  0999 V2000
   -1.2375   -0.7867    0.0000 N   0  0  0  0  0  0  0  0  0  0  0  0
   -0.4753   -0.4710    0.0000 C   0  0  0  0  0  0  0  0  0  0  0  0
   -0.1596    0.2912    0.0000 C   0  0  0  0  0  0  0  0  0  0  0  0
   -0.4753    1.0534    0.0000 C   0  0  0  0  0  0  0  0  0  0  0  0
   -1.2375    1.3691    0.0000 C   0  0  0  0  0  0  0  0  0  0  0  0
   -1.9997    1.0534    0.0000 C   0  0  0  0  0  0  0  0  0  0  0  0
   -2.3154    0.2912    0.0000 C   0  0  0  0  0  0  0  0  0  0  0  0
   -1.9997   -0.4710    0.0000 C   0  0  0  0  0  0  0  0  0  0  0  0
    0.1081   -1.0544    0.0000 C   0  0  0  0  0  0  0  0  0  0  0  0
    0.6654    0.2912    0.0000 C   0  0  0  0  0  0  0  0  0  0  0  0
    1.0779    1.0057    0.0000 C   0  0  0  0  0  0  0  0  0  0  0  0
   -0.1055   -1.8513    0.0000 C   0  0  0  0  0  0  0  0  0  0  0  0
    0.4779   -2.4346    0.0000 C   0  0  0  0  0  0  0  0  0  0  0  0
    1.2748   -2.2211    0.0000 C   0  0  0  0  0  0  0  0  0  0  0  0
    1.4883   -1.4242    0.0000 C   0  0  0  0  0  0  0  0  0  0  0  0
    0.9050   -0.8408    0.0000 C   0  0  0  0  0  0  0  0  0  0  0  0
    1.9029    1.0057    0.0000 C   0  0  0  0  0  0  0  0  0  0  0  0
    2.3154    1.7201    0.0000 C   0  0  0  0  0  0  0  0  0  0  0  0
    1.9029    2.4346    0.0000 C   0  0  0  0  0  0  0  0  0  0  0  0
    1.0779    2.4346    0.0000 C   0  0  0  0  0  0  0  0  0  0  0  0
    0.6654    1.7201    0.0000 C   0  0  0  0  0  0  0  0  0  0  0  0
  1  2  1  0      
  2  3  1  0      
  3  4  1  0      
  4  5  1  0      
  5  6  1  0      
  6  7  1  0      
  7  8  1  0      
  8  1  1  0      
  2  9  1  1      
  3 10  1  6      
 10 11  1  0      
  9 12  2  0      
 12 13  1  0      
 13 14  2  0      
 14 15  1  0      
 15 16  2  0      
 16  9  1  0      
 11 17  2  0      
 17 18  1  0      
 18 19  2  0      
 19 20  1  0      
 20 21  2  0      
 21 11  1  0      
M  END
